# Supplementary material for: A peptide N-terminal protection strategy for comprehensive glycoproteome analysis using hydrazide chemistry based method
Source: PubMed Central journal article supplement (PMC4426672; doi:10.1038/srep10164), 2015-05-11
Supplement: srep10164-s1.pdf [file srep10164-s1.pdf]

## Supplementary Information

### **A peptide N-terminal protection strategy for comprehensive glycoproteome analysis using hydrazide chemistry based method**

Junfeng Huang<sup>1,2</sup>, Hongqiang Qin<sup>1</sup>, Zhen Sun<sup>1,2</sup>, Guang Huang<sup>1,2</sup>, Jiawei Mao<sup>1,2</sup>, Kai Cheng<sup>1,2</sup>, Zhang Zhang<sup>1,2</sup>, Hao Wan<sup>1,3</sup>, Yating Yao<sup>1,2</sup>, Jing Dong<sup>1</sup>, Jun Zhu<sup>1,2</sup>, Fangjun Wang<sup>1</sup>, Mingliang Ye<sup>1</sup> & Hanfa Zou<sup>1</sup>

<sup>1</sup>CAS Key Laboratory of Separation Sciences for Analytical Chemistry, National Chromatographic R&A Center, Dalian Institute of Chemical Physics, Chinese Academy of Sciences, Dalian, China; <sup>2</sup>University of Chinese Academy of Sciences, Beijing, China; <sup>3</sup>Shanghai Key Laboratory of Functional Materials Chemistry, East China University of Science and Technology. Correspondence should be addressed to H.F. Zou ([hanfazou@dicp.ac.cn](mailto:hanfazou@dicp.ac.cn)) or M.L. Ye ([mingliang@dicp.ac.cn](mailto:mingliang@dicp.ac.cn)).

Supplementary Information contains:

Supplementary Figures S1-S9

**Note: Table S1/ The percentages of peptides containing each amino acid residue overall.**

**Table S2/ The percentages of peptides containing each amino acid residue at C-terminus.**

**Table S3/ The percentages of peptides containing each amino acid residue at N-terminus.**

**Table S4 / The glycosites and glycoproteins identified in large scale studies using the conventional and improved HC method.**

**Table S5 / The de-glycopeptides identified in large-scale studies using the conventional and improved HC method.**

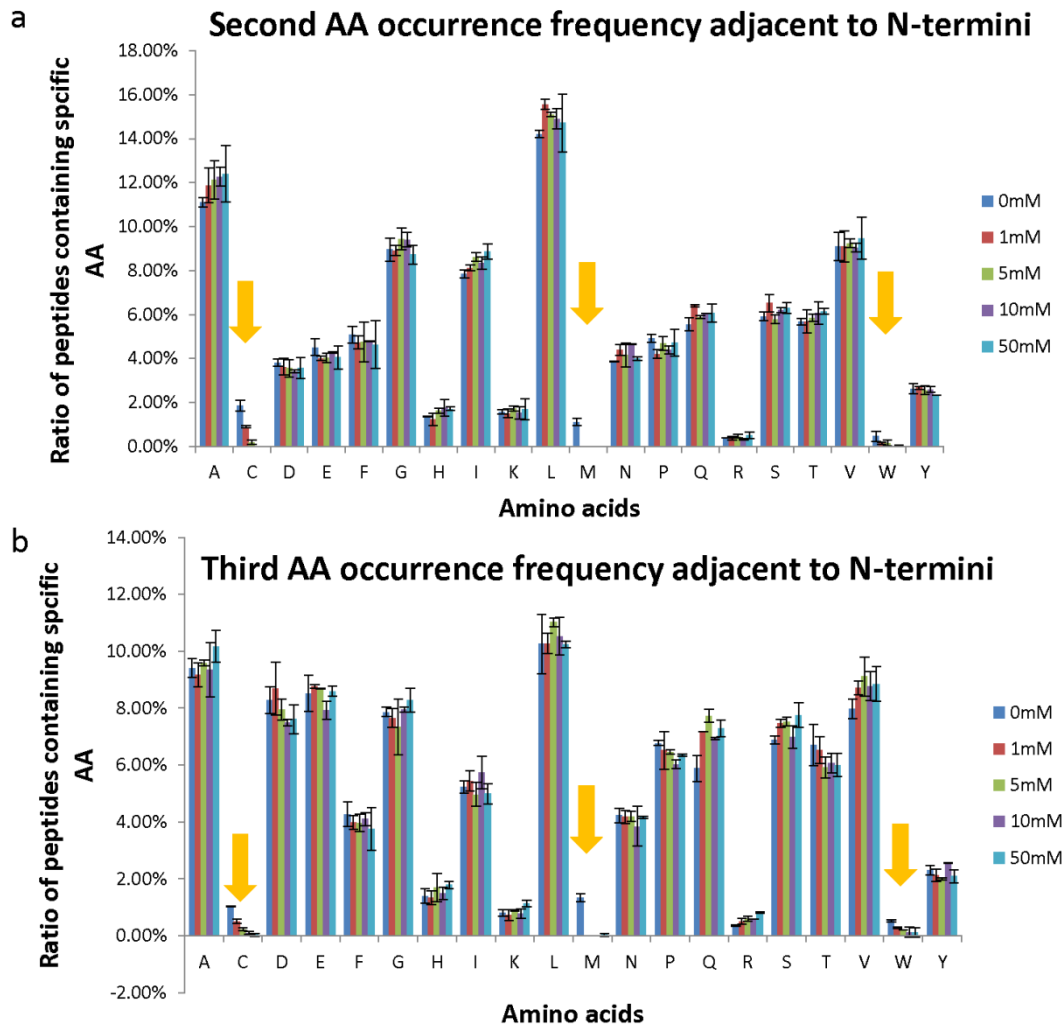

**Figure S1 |Proteome-wide amino acid frequency check approach to locate the possible side reaction sites. (a)** The percentage of peptides with the second residue from the N-termini with a specific type of amino acid residue in all peptides. **(b)** The percentage of peptides with the third residue from the N-termini with a specific type of amino acid residue in all peptides. Above data were averaged from 4 replicate experiments (error bars represent the standard deviation )

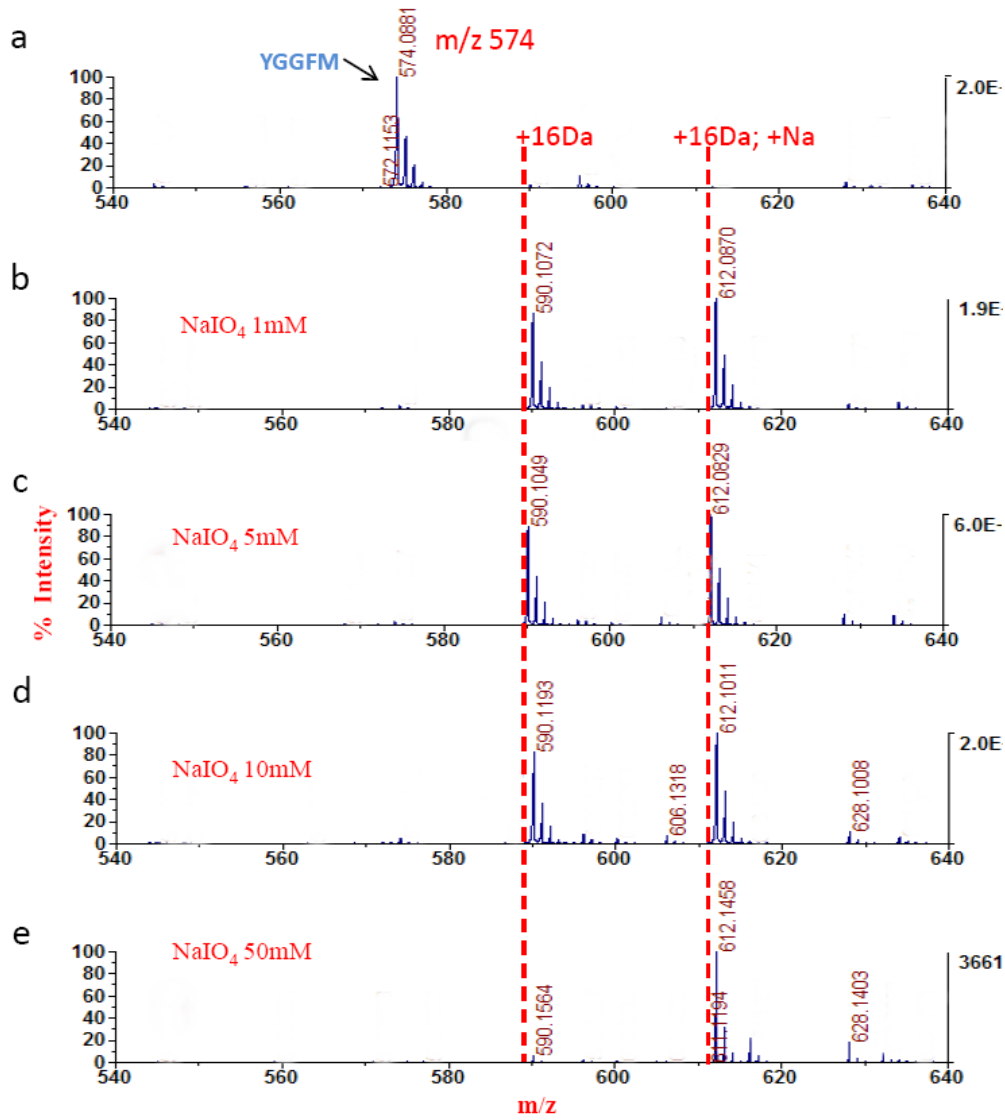

**Figure S2 | The side reactions on Met.** (a-e) MALDI mass spectra of the Met containing peptides YGGFM (0.01  $\mu\text{g}/\mu\text{L}$ , 0.5  $\mu\text{L}$ ) oxidized at 0, 1, 5, 10, 50 mM  $\text{NaIO}_4$ .

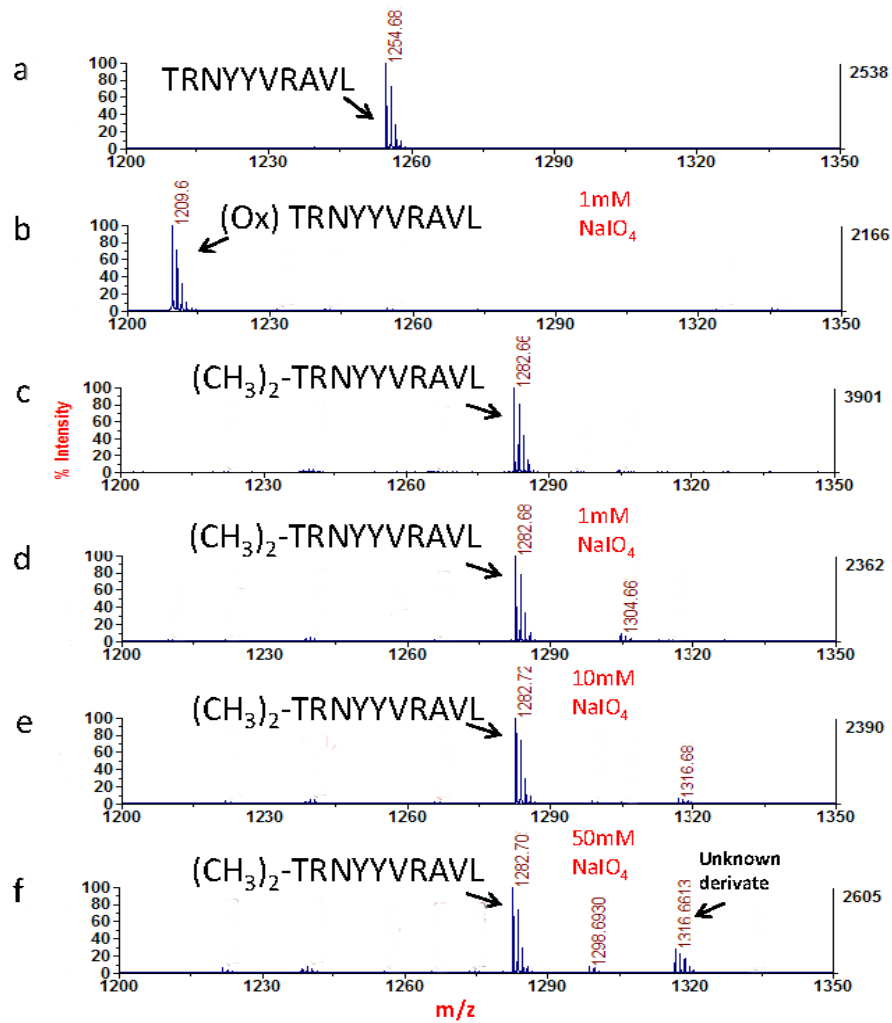

**Figure S3 | PNP strategy prevents the oxidation of peptides with N-terminal Thr.** MALDI mass spectra of the standard N-terminal Thr peptide TRNYYVRAVL (0.01 $\mu\text{g}/\mu\text{L}$ , 0.5 $\mu\text{L}$ ) with or without dimethyl protection oxidized in periodate solutions with different concentrations: (a) without protection, without oxidation; (b) without protection, with oxidation (1mM  $\text{NaIO}_4$ ); (c) with protection, without oxidation; (d) with protection, with oxidation (1mM  $\text{NaIO}_4$ ); (e) with protection, with oxidation (10mM  $\text{NaIO}_4$ ); (f) with protection, with oxidation (50mM  $\text{NaIO}_4$ ).

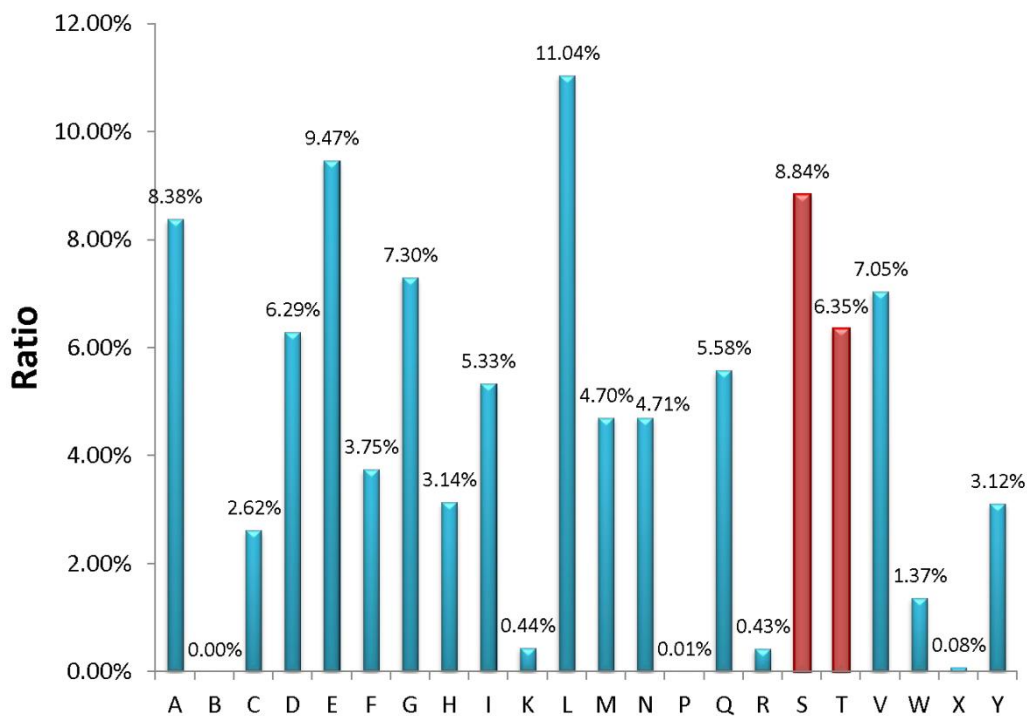

**Figure S4 | The N-terminal amino acid residue distribution of in silico tryptic peptides of mouse proteome (database: IPI mouse v3.87).**

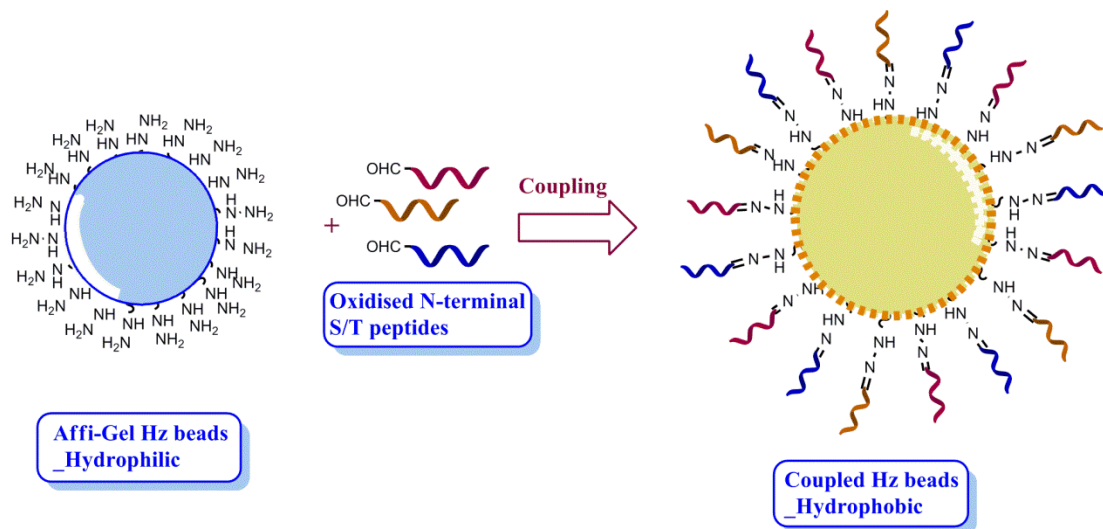

**Figure S5 | Surface property change of hydrazide beads during glycopeptide enrichment in the conventional HC method.** Enormous peptides with N-terminal Seri/Thr are also coupled onto the hydrazide beads in the conventional HC method because they are also oxidized. This makes the surface of the beads changing from hydrophilic to hydrophobic, from neutral to charged. While in the PNP strategy, the bead surface will not change significantly because these peptides will not be bound.

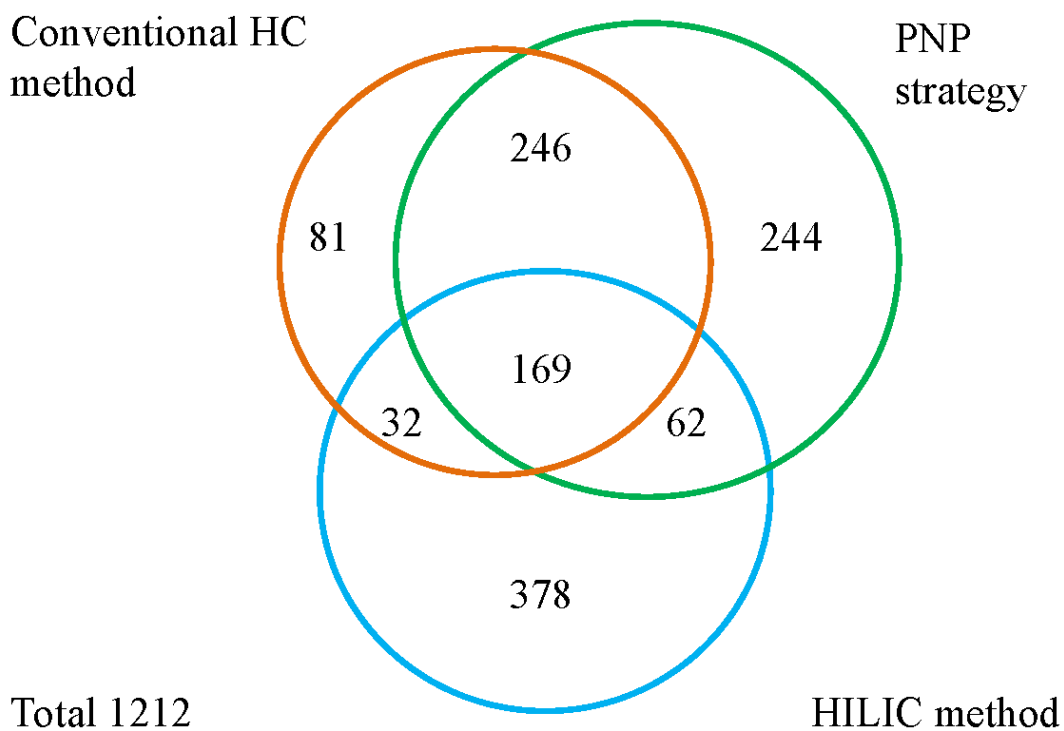

**Figure S6 | Performance of the PNP strategy.** Comparison of the overlaps of glycosites identifications for conventional HC method, PNP strategy and the HILIC method.

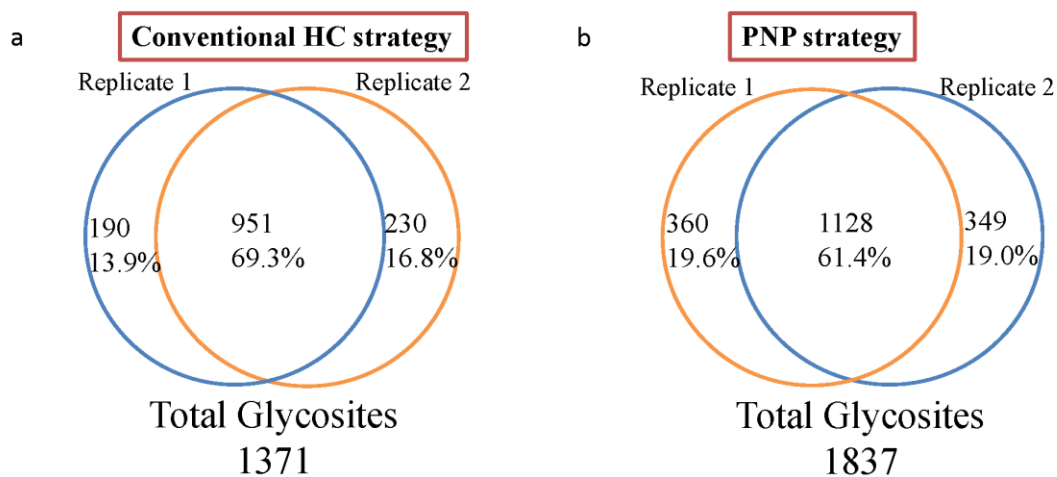

**Figure S7 | Comparison of replicate runs.** (a) Conventional HC method. (b) PNP strategy.

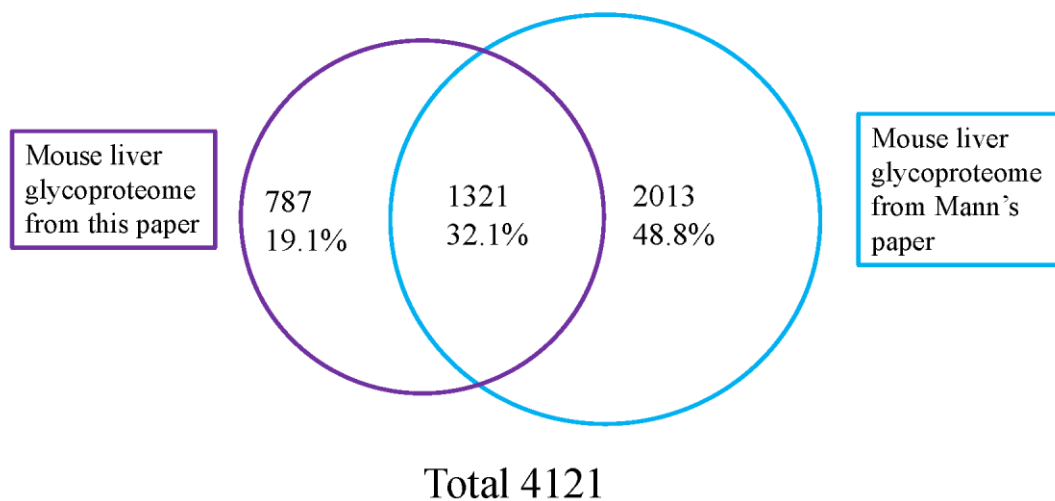

**Figure S8 | Comparison of large scale mouse liver glycoproteome dataset acquired in this paper with the dataset acquired from lectin affinity methods reported in literature.** Overlap of the glycosites identified in this work and in the work by using lectin affinity methods<sup>1</sup>.

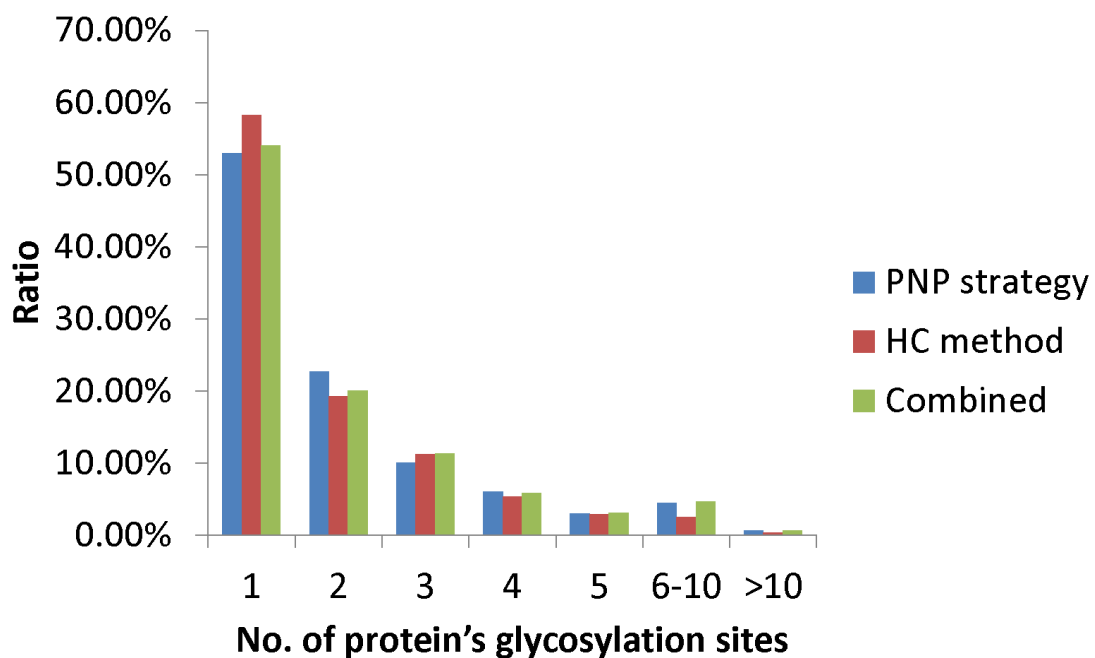

**Figure S9 | Distribution of singly and multiply glycosylated proteins.** The ratio of identified proteins with multi-glycosites in PNP strategy is higher than the conventional HC method.

1. Zielinska, D.F., Gnad, F., Wisniewski, J.R. & Mann, M. Precision Mapping of an In Vivo N-Glycoproteome Reveals Rigid Topological and Sequence Constraints. *Cell* **141**, 897-907

(2010).



Table S1| The percentages of peptides containing each amino acid residue overall

|          | NaIO <sub>4</sub> | 0mM_1         | 0mM_2         | 0mM_3         | 0mM_4         | 1mM_1         | 1mM_2         | 1mM_3         | 1mM_4        | 5mM_1        | 5mM_2        | 5mM_3        | 5mM_4        | 10mM_1       | 10mM_2       | 10mM_3       | 10mM_4       | 50mM_1       | 50mM_2       | 50mM_3       | 50mM_4 |
|----------|-------------------|---------------|---------------|---------------|---------------|---------------|---------------|---------------|--------------|--------------|--------------|--------------|--------------|--------------|--------------|--------------|--------------|--------------|--------------|--------------|--------|
| A        | 69.35%            | 69.21%        | 70.55%        | 71.93%        | 70.39%        | 71.30%        | 70.74%        | 71.35%        | 70.60%       | 69.56%       | 71.56%       | 68.98%       | 68.50%       | 69.11%       | 69.99%       | 70.58%       | 67.80%       | 68.87%       | 69.31%       | 69.53%       |        |
| R        | 45.46%            | 44.47%        | 44.59%        | 42.73%        | 45.13%        | 44.84%        | 44.33%        | 44.03%        | 45.72%       | 46.81%       | 44.72%       | 44.55%       | 47.77%       | 44.35%       | 45.72%       | 45.42%       | 47.03%       | 47.50%       | 48.71%       | 49.52%       |        |
| N        | 46.18%            | 43.74%        | 45.27%        | 44.34%        | 46.25%        | 45.27%        | 46.31%        | 45.76%        | 44.17%       | 46.61%       | 46.93%       | 42.53%       | 43.53%       | 45.55%       | 46.26%       | 46.13%       | 44.47%       | 42.34%       | 44.47%       | 45.57%       |        |
| D        | 62.95%            | 59.42%        | 62.81%        | 60.34%        | 59.80%        | 60.67%        | 59.45%        | 59.97%        | 60.28%       | 60.62%       | 62.11%       | 57.56%       | 58.97%       | 57.97%       | 62.50%       | 59.64%       | 60.20%       | 58.06%       | 61.65%       | 60.74%       |        |
| <b>C</b> | <b>17.28%</b>     | <b>16.03%</b> | <b>15.78%</b> | <b>16.92%</b> | <b>10.53%</b> | <b>10.82%</b> | <b>10.12%</b> | <b>10.36%</b> | <b>4.18%</b> | <b>4.27%</b> | <b>3.82%</b> | <b>3.87%</b> | <b>1.60%</b> | <b>1.57%</b> | <b>1.87%</b> | <b>1.78%</b> | <b>0.38%</b> | <b>0.08%</b> | <b>0.58%</b> | <b>0.70%</b> |        |
| Q        | 51.15%            | 50.83%        | 50.66%        | 50.05%        | 52.37%        | 51.82%        | 50.61%        | 50.63%        | 51.79%       | 51.48%       | 53.17%       | 50.26%       | 50.35%       | 50.34%       | 51.87%       | 50.04%       | 50.71%       | 48.47%       | 50.64%       | 52.20%       |        |
| E        | 66.55%            | 64.86%        | 66.73%        | 65.46%        | 67.89%        | 67.04%        | 67.25%        | 67.19%        | 65.95%       | 67.26%       | 67.34%       | 65.20%       | 66.76%       | 66.64%       | 68.72%       | 70.84%       | 65.09%       | 63.87%       | 67.05%       | 67.24%       |        |
| G        | 65.20%            | 63.35%        | 63.16%        | 66.27%        | 65.20%        | 65.92%        | 65.15%        | 66.48%        | 64.26%       | 64.50%       | 69.45%       | 65.73%       | 64.81%       | 66.42%       | 63.70%       | 64.44%       | 64.18%       | 64.68%       | 64.35%       | 64.56%       |        |
| H        | 21.56%            | 21.58%        | 23.27%        | 18.37%        | 20.46%        | 19.11%        | 19.60%        | 20.64%        | 21.31%       | 24.06%       | 21.31%       | 22.76%       | 23.92%       | 20.34%       | 23.26%       | 21.60%       | 28.44%       | 21.29%       | 25.80%       | 25.24%       |        |
| I        | 59.89%            | 56.42%        | 58.06%        | 59.48%        | 59.47%        | 59.55%        | 59.86%        | 60.60%        | 58.87%       | 60.36%       | 62.71%       | 58.79%       | 60.15%       | 58.71%       | 60.63%       | 61.42%       | 60.80%       | 57.18%       | 59.78%       | 60.93%       |        |
| L        | 67.78%            | 79.31%        | 79.32%        | 79.74%        | 82.37%        | 82.00%        | 81.91%        | 82.34%        | 81.59%       | 83.17%       | 87.94%       | 80.32%       | 82.27%       | 81.60%       | 83.22%       | 82.13%       | 82.39%       | 79.03%       | 83.20%       | 83.75%       |        |
| K        | 64.26%            | 64.39%        | 65.95%        | 65.68%        | 64.21%        | 64.25%        | 64.86%        | 65.38%        | 64.33%       | 64.76%       | 64.62%       | 65.91%       | 63.28%       | 64.40%       | 65.37%       | 65.60%       | 66.14%       | 62.98%       | 64.35%       | 64.18%       |        |
| <b>M</b> | <b>16.00%</b>     | <b>12.60%</b> | <b>12.40%</b> | <b>11.64%</b> | <b>0.26%</b>  | <b>0.25%</b>  | <b>0.35%</b>  | <b>0.24%</b>  | <b>0.27%</b> | <b>0.39%</b> | <b>0.20%</b> | <b>0.44%</b> | <b>0.21%</b> | <b>0.22%</b> | <b>0.27%</b> | <b>0.53%</b> | <b>0.23%</b> | <b>0.32%</b> | <b>0.19%</b> | <b>0.19%</b> |        |
| F        | 46.60%            | 41.12%        | 41.94%        | 40.79%        | 42.17%        | 41.13%        | 42.23%        | 41.99%        | 41.67%       | 42.67%       | 48.14%       | 41.56%       | 45.69%       | 41.74%       | 45.39%       | 45.16%       | 44.47%       | 38.79%       | 45.17%       | 46.21%       |        |
| P        | 62.56%            | 59.88%        | 59.58%        | 61.80%        | 58.95%        | 60.11%        | 61.20%        | 60.91%        | 58.53%       | 59.76%       | 62.01%       | 57.73%       | 57.79%       | 57.89%       | 59.02%       | 59.47%       | 59.52%       | 56.61%       | 58.62%       | 61.19%       |        |
| S        | 62.10%            | 59.81%        | 60.02%        | 60.02%        | 57.96%        | 58.69%        | 58.46%        | 60.36%        | 58.46%       | 56.80%       | 62.91%       | 57.64%       | 57.79%       | 56.62%       | 58.02%       | 59.29%       | 58.47%       | 55.40%       | 56.69%       | 58.00%       |        |
| T        | 59.97%            | 59.23%        | 61.54%        | 60.56%        | 56.51%        | 57.95%        | 55.21%        | 58.01%        | 56.04%       | 55.03%       | 59.60%       | 55.62%       | 55.63%       | 57.07%       | 57.09%       | 57.07%       | 54.85%       | 54.76%       | 54.57%       | 55.83%       |        |
| <b>W</b> | <b>8.62%</b>      | <b>7.90%</b>  | <b>7.74%</b>  | <b>7.38%</b>  | <b>6.45%</b>  | <b>5.57%</b>  | <b>5.35%</b>  | <b>4.95%</b>  | <b>5.33%</b> | <b>5.00%</b> | <b>5.03%</b> | <b>4.31%</b> | <b>3.96%</b> | <b>2.47%</b> | <b>3.81%</b> | <b>3.02%</b> | <b>3.91%</b> | <b>2.02%</b> | <b>3.80%</b> | <b>3.57%</b> |        |
| Y        | 32.34%            | 29.94%        | 29.25%        | 29.42%        | 30.20%        | 30.18%        | 30.60%        | 29.83%        | 29.40%       | 29.39%       | 31.96%       | 28.65%       | 29.97%       | 30.67%       | 30.82%       | 30.67%       | 29.65%       | 25.73%       | 29.67%       | 30.34%       |        |
| V        | 69.48%            | 75.72%        | 70.06%        | 71.77%        | 72.76%        | 69.88%        | 71.03%        | 71.59%        | 71.27%       | 71.66%       | 72.16%       | 70.47%       | 70.17%       | 69.78%       | 72.26%       | 71.64%       | 69.45%       | 70.73%       | 69.82%       | 69.34%       |        |

These data was based on the peptide identifications from the mouse tryptic peptide samples treated with different NaIO<sub>4</sub> concentration.

Table S2| The percentages of peptides containing each amino acid residue at the C-terminus

|          | NaIO4         | 0mM_1         | 0mM_2         | 0mM_3         | 0mM_4         | 1mM_1         | 1mM_2         | 1mM_3         | 1mM_4         | 5mM_1         | 5mM_2         | 5mM_3         | 5mM_4         | 10mM_1        | 10mM_2        | 10mM_3        | 10mM_4        | 50mM_1        | 50mM_2        | 50mM_3        | 50mM_4 |
|----------|---------------|---------------|---------------|---------------|---------------|---------------|---------------|---------------|---------------|---------------|---------------|---------------|---------------|---------------|---------------|---------------|---------------|---------------|---------------|---------------|--------|
| A        | 0.04%         | 0.12%         | 0.05%         | 0.05%         | 0.00%         | 0.06%         | 0.06%         | 0.08%         | 0.07%         | 0.07%         | 0.00%         | 0.09%         | 0.00%         | 0.22%         | 0.07%         | 0.09%         | 0.00%         | 0.00%         | 0.00%         | 0.00%         | 0.06%  |
| C        | 0.00%         | 0.00%         | 0.00%         | 0.00%         | 0.00%         | 0.00%         | 0.00%         | 0.00%         | 0.00%         | 0.00%         | 0.00%         | 0.00%         | 0.00%         | 0.00%         | 0.00%         | 0.00%         | 0.00%         | 0.00%         | 0.00%         | 0.00%         | 0.00%  |
| D        | 0.00%         | 0.00%         | 0.05%         | 0.05%         | 0.00%         | 0.00%         | 0.00%         | 0.00%         | 0.00%         | 0.00%         | 0.00%         | 0.00%         | 0.00%         | 0.00%         | 0.00%         | 0.00%         | 0.00%         | 0.00%         | 0.00%         | 0.06%         | 0.00%  |
| E        | 0.08%         | 0.08%         | 0.20%         | 0.11%         | 0.00%         | 0.00%         | 0.06%         | 0.08%         | 0.07%         | 0.13%         | 0.10%         | 0.09%         | 0.21%         | 0.15%         | 0.07%         | 0.09%         | 0.15%         | 0.08%         | 0.08%         | 0.06%         | 0.06%  |
| F        | 0.04%         | 0.04%         | 0.05%         | 0.05%         | 0.00%         | 0.06%         | 0.06%         | 0.08%         | 0.07%         | 0.07%         | 0.00%         | 0.09%         | 0.14%         | 0.15%         | 0.07%         | 0.00%         | 0.00%         | 0.08%         | 0.13%         | 0.06%         |        |
| G        | 0.00%         | 0.00%         | 0.00%         | 0.00%         | 0.00%         | 0.00%         | 0.00%         | 0.00%         | 0.00%         | 0.00%         | 0.00%         | 0.00%         | 0.00%         | 0.00%         | 0.00%         | 0.00%         | 0.00%         | 0.00%         | 0.00%         | 0.00%         | 0.00%  |
| H        | 0.04%         | 0.15%         | 0.10%         | 0.00%         | 0.13%         | 0.12%         | 0.12%         | 0.16%         | 0.07%         | 0.13%         | 0.20%         | 0.09%         | 0.07%         | 0.07%         | 0.13%         | 0.00%         | 0.08%         | 0.08%         | 0.13%         | 0.13%         |        |
| I        | 0.08%         | 0.12%         | 0.10%         | 0.00%         | 0.13%         | 0.06%         | 0.12%         | 0.08%         | 0.07%         | 0.20%         | 0.20%         | 0.09%         | 0.14%         | 0.07%         | 0.13%         | 0.09%         | 0.15%         | 0.08%         | 0.13%         | 0.06%         |        |
| <b>K</b> | <b>56.83%</b> | <b>57.65%</b> | <b>58.16%</b> | <b>58.94%</b> | <b>57.24%</b> | <b>57.14%</b> | <b>57.59%</b> | <b>57.54%</b> | <b>56.51%</b> | <b>55.42%</b> | <b>56.38%</b> | <b>56.59%</b> | <b>53.96%</b> | <b>56.69%</b> | <b>56.62%</b> | <b>56.00%</b> | <b>55.61%</b> | <b>55.24%</b> | <b>54.38%</b> | <b>53.35%</b> |        |
| L        | 0.25%         | 0.12%         | 0.20%         | 0.38%         | 0.26%         | 0.43%         | 0.35%         | 0.47%         | 0.34%         | 0.39%         | 0.50%         | 0.44%         | 0.35%         | 0.37%         | 0.13%         | 0.53%         | 0.45%         | 0.16%         | 0.32%         | 0.38%         |        |
| M        | 0.00%         | 0.00%         | 0.00%         | 0.00%         | 0.00%         | 0.00%         | 0.00%         | 0.00%         | 0.00%         | 0.00%         | 0.00%         | 0.00%         | 0.00%         | 0.00%         | 0.00%         | 0.00%         | 0.00%         | 0.00%         | 0.00%         | 0.00%         | 0.00%  |
| N        | 0.08%         | 0.04%         | 0.05%         | 0.11%         | 0.00%         | 0.06%         | 0.00%         | 0.00%         | 0.00%         | 0.00%         | 0.10%         | 0.00%         | 0.00%         | 0.00%         | 0.00%         | 0.00%         | 0.00%         | 0.00%         | 0.00%         | 0.00%         | 0.00%  |
| P        | 0.00%         | 0.08%         | 0.05%         | 0.11%         | 0.13%         | 0.12%         | 0.12%         | 0.16%         | 0.13%         | 0.13%         | 0.20%         | 0.18%         | 0.14%         | 0.15%         | 0.13%         | 0.18%         | 0.08%         | 0.00%         | 0.13%         | 0.13%         |        |
| Q        | 0.08%         | 0.12%         | 0.05%         | 0.16%         | 0.20%         | 0.06%         | 0.06%         | 0.16%         | 0.20%         | 0.20%         | 0.20%         | 0.00%         | 0.07%         | 0.15%         | 0.07%         | 0.00%         | 0.08%         | 0.08%         | 0.13%         | 0.13%         |        |
| <b>R</b> | <b>42.19%</b> | <b>41.23%</b> | <b>40.72%</b> | <b>39.66%</b> | <b>41.64%</b> | <b>41.62%</b> | <b>41.19%</b> | <b>40.89%</b> | <b>42.21%</b> | <b>43.13%</b> | <b>41.91%</b> | <b>41.83%</b> | <b>44.44%</b> | <b>41.59%</b> | <b>42.25%</b> | <b>42.67%</b> | <b>43.04%</b> | <b>43.87%</b> | <b>44.27%</b> | <b>45.19%</b> |        |
| S        | 0.08%         | 0.12%         | 0.10%         | 0.16%         | 0.13%         | 0.12%         | 0.17%         | 0.16%         | 0.13%         | 0.00%         | 0.00%         | 0.26%         | 0.21%         | 0.22%         | 0.13%         | 0.27%         | 0.15%         | 0.08%         | 0.13%         | 0.19%         |        |
| T        | 0.00%         | 0.04%         | 0.05%         | 0.05%         | 0.07%         | 0.00%         | 0.00%         | 0.08%         | 0.00%         | 0.00%         | 0.10%         | 0.09%         | 0.07%         | 0.07%         | 0.00%         | 0.00%         | 0.08%         | 0.16%         | 0.00%         | 0.06%         |        |
| V        | 0.08%         | 0.08%         | 0.05%         | 0.11%         | 0.07%         | 0.06%         | 0.06%         | 0.08%         | 0.13%         | 0.13%         | 0.10%         | 0.09%         | 0.07%         | 0.07%         | 0.07%         | 0.09%         | 0.08%         | 0.08%         | 0.06%         | 0.13%         |        |
| W        | 0.00%         | 0.00%         | 0.00%         | 0.00%         | 0.00%         | 0.00%         | 0.00%         | 0.00%         | 0.00%         | 0.00%         | 0.00%         | 0.00%         | 0.00%         | 0.00%         | 0.00%         | 0.00%         | 0.00%         | 0.00%         | 0.00%         | 0.00%         | 0.00%  |
| Y        | 0.08%         | 0.04%         | 0.05%         | 0.05%         | 0.00%         | 0.06%         | 0.06%         | 0.00%         | 0.00%         | 0.00%         | 0.00%         | 0.09%         | 0.14%         | 0.00%         | 0.13%         | 0.00%         | 0.08%         | 0.00%         | 0.06%         | 0.06%         |        |

These data was based on the peptide identifications from the mouse tryptic peptide samples treated with different NaIO4 concentration.

Table S3| The percentages of peptides containing each amino acid residue at the N-terminus

|          | NaIO <sub>4</sub> | 0mM_1        | 0mM_2        | 0mM_3        | 0mM_4        | 1mM_1        | 1mM_2        | 1mM_3        | 1mM_4        | 5mM_1        | 5mM_2        | 5mM_3        | 5mM_4        | 10mM_1       | 10mM_2       | 10mM_3       | 10mM_4       | 50mM_1       | 50mM_2       | 50mM_3       | 50mM_4       |
|----------|-------------------|--------------|--------------|--------------|--------------|--------------|--------------|--------------|--------------|--------------|--------------|--------------|--------------|--------------|--------------|--------------|--------------|--------------|--------------|--------------|--------------|
| A        | 12.31%            | 12.41%       | 13.52%       | 13.95%       | 14.74%       | 15.28%       | 15.36%       | 16.64%       | 15.85%       | 15.91%       | 15.38%       | 15.99%       | 14.95%       | 15.78%       | 14.97%       | 14.49%       | 15.05%       | 16.53%       | 15.70%       | 14.53%       |              |
| <b>C</b> | <b>0.34%</b>      | <b>0.35%</b> | <b>0.34%</b> | <b>0.32%</b> | <b>0.07%</b> | <b>0.12%</b> | <b>0.12%</b> | <b>0.24%</b> | <b>0.13%</b> | <b>0.07%</b> | <b>0.10%</b> | <b>0.09%</b> | <b>0.07%</b> | <b>0.00%</b> | <b>0.07%</b> | <b>0.00%</b> | <b>0.00%</b> | <b>0.00%</b> | <b>0.00%</b> | <b>0.00%</b> | <b>0.00%</b> |
| D        | 5.05%             | 5.55%        | 4.95%        | 5.60%        | 6.38%        | 6.86%        | 6.92%        | 6.20%        | 6.20%        | 6.57%        | 7.04%        | 6.33%        | 6.47%        | 5.91%        | 6.75%        | 7.73%        | 5.87%        | 6.29%        | 6.44%        | 6.88%        |              |
| E        | 6.66%             | 7.17%        | 6.32%        | 6.73%        | 7.63%        | 8.66%        | 8.20%        | 8.40%        | 7.42%        | 6.97%        | 7.74%        | 7.73%        | 7.86%        | 8.38%        | 7.95%        | 8.09%        | 7.90%        | 6.37%        | 7.72%        | 7.90%        |              |
| F        | 3.99%             | 3.85%        | 4.41%        | 3.56%        | 4.67%        | 4.39%        | 4.36%        | 4.40%        | 5.46%        | 4.60%        | 5.23%        | 5.45%        | 5.35%        | 4.71%        | 5.35%        | 5.33%        | 5.19%        | 5.32%        | 5.02%        | 5.10%        |              |
| G        | 8.79%             | 8.44%        | 7.74%        | 8.46%        | 10.33%       | 10.58%       | 9.95%        | 9.89%        | 10.32%       | 9.86%        | 10.65%       | 8.88%        | 9.60%        | 10.32%       | 9.69%        | 10.31%       | 9.10%        | 9.76%        | 9.52%        | 9.88%        |              |
| H        | 1.27%             | 1.54%        | 1.71%        | 1.08%        | 1.18%        | 1.67%        | 1.51%        | 1.26%        | 1.55%        | 2.04%        | 1.01%        | 2.02%        | 1.74%        | 2.02%        | 2.01%        | 1.60%        | 2.78%        | 1.77%        | 2.32%        | 2.55%        |              |
| I        | 8.32%             | 7.86%        | 8.38%        | 8.08%        | 9.93%        | 9.77%        | 10.01%       | 9.26%        | 9.51%        | 9.93%        | 10.15%       | 9.40%        | 9.67%        | 10.17%       | 9.69%        | 9.78%        | 10.61%       | 10.32%       | 9.97%        | 9.31%        |              |
| K        | 3.18%             | 3.01%        | 3.53%        | 2.32%        | 3.16%        | 3.15%        | 3.43%        | 2.90%        | 3.64%        | 4.60%        | 3.02%        | 4.31%        | 4.66%        | 3.89%        | 4.14%        | 4.27%        | 5.12%        | 4.68%        | 4.50%        | 4.53%        |              |
| L        | 11.38%            | 11.06%       | 10.63%       | 10.40%       | 14.01%       | 13.17%       | 13.21%       | 13.27%       | 13.42%       | 13.41%       | 13.57%       | 14.15%       | 14.39%       | 14.51%       | 14.17%       | 12.80%       | 13.77%       | 14.03%       | 13.19%       | 13.45%       |              |
| <b>M</b> | <b>2.04%</b>      | <b>1.73%</b> | <b>1.76%</b> | <b>1.67%</b> | <b>0.00%</b> | <b>0.00%</b> | <b>0.06%</b> | <b>0.08%</b> | <b>0.07%</b> | <b>0.07%</b> | <b>0.00%</b> | <b>0.00%</b> | <b>0.00%</b> | <b>0.00%</b> | <b>0.00%</b> | <b>0.00%</b> | <b>0.09%</b> | <b>0.00%</b> | <b>0.08%</b> | <b>0.06%</b> | <b>0.06%</b> |
| N        | 3.78%             | 3.74%        | 4.07%        | 3.66%        | 5.39%        | 5.13%        | 4.94%        | 4.32%        | 3.98%        | 5.00%        | 4.62%        | 3.95%        | 4.66%        | 4.19%        | 4.34%        | 4.71%        | 4.44%        | 3.87%        | 4.63%        | 4.72%        |              |
| P        | 0.55%             | 0.50%        | 0.34%        | 0.48%        | 0.53%        | 0.56%        | 0.41%        | 0.47%        | 0.47%        | 0.46%        | 0.60%        | 0.53%        | 0.42%        | 0.52%        | 0.47%        | 0.62%        | 0.53%        | 0.40%        | 0.45%        | 0.57%        |              |
| Q        | 1.99%             | 2.04%        | 1.47%        | 1.83%        | 1.97%        | 2.35%        | 1.80%        | 1.88%        | 2.29%        | 2.04%        | 2.31%        | 1.76%        | 1.81%        | 2.09%        | 1.67%        | 1.87%        | 1.88%        | 1.94%        | 1.87%        | 2.17%        |              |
| R        | 1.02%             | 1.31%        | 1.27%        | 0.97%        | 1.25%        | 1.30%        | 1.34%        | 1.18%        | 1.55%        | 1.25%        | 1.21%        | 1.58%        | 1.53%        | 0.90%        | 1.67%        | 1.51%        | 1.58%        | 1.69%        | 2.19%        | 1.91%        |              |
| <b>S</b> | <b>7.60%</b>      | <b>7.36%</b> | <b>7.50%</b> | <b>7.33%</b> | <b>1.32%</b> | <b>1.05%</b> | <b>1.16%</b> | <b>1.33%</b> | <b>1.35%</b> | <b>1.12%</b> | <b>1.01%</b> | <b>1.23%</b> | <b>0.83%</b> | <b>0.75%</b> | <b>0.87%</b> | <b>0.80%</b> | <b>0.75%</b> | <b>0.81%</b> | <b>0.90%</b> | <b>0.96%</b> |              |
| <b>T</b> | <b>7.39%</b>      | <b>7.86%</b> | <b>7.79%</b> | <b>7.92%</b> | <b>0.46%</b> | <b>0.37%</b> | <b>0.58%</b> | <b>0.39%</b> | <b>0.34%</b> | <b>0.13%</b> | <b>0.20%</b> | <b>0.18%</b> | <b>0.14%</b> | <b>0.15%</b> | <b>0.13%</b> | <b>0.36%</b> | <b>0.15%</b> | <b>0.24%</b> | <b>0.13%</b> | <b>0.19%</b> |              |
| V        | 10.78%            | 10.83%       | 10.83%       | 11.75%       | 13.49%       | 12.43%       | 13.44%       | 14.21%       | 13.22%       | 12.89%       | 13.47%       | 13.27%       | 12.24%       | 12.64%       | 12.83%       | 12.71%       | 12.72%       | 13.15%       | 12.29%       | 12.62%       |              |
| <b>W</b> | <b>0.72%</b>      | <b>0.77%</b> | <b>0.78%</b> | <b>0.70%</b> | <b>0.46%</b> | <b>0.25%</b> | <b>0.35%</b> | <b>0.55%</b> | <b>0.40%</b> | <b>0.46%</b> | <b>0.30%</b> | <b>0.44%</b> | <b>0.42%</b> | <b>0.22%</b> | <b>0.47%</b> | <b>0.18%</b> | <b>0.15%</b> | <b>0.24%</b> | <b>0.32%</b> | <b>0.06%</b> |              |
| Y        | 2.84%             | 2.62%        | 2.65%        | 3.18%        | 3.03%        | 2.91%        | 2.85%        | 3.14%        | 2.83%        | 2.63%        | 2.41%        | 2.72%        | 3.20%        | 2.84%        | 2.74%        | 2.76%        | 2.41%        | 2.50%        | 2.77%        | 2.61%        |              |

These data was based on the peptide identifications from the mouse tryptic peptide samples treated with different NaIO<sub>4</sub> concentration.

Table S4. Total identified glycosites and glycoproteins

| Protein     | Glycosite | Glycosite sequence window         | Localization  | probScore | diff Score | Score for localization | Modified sequence           | Deamidation (N) Probabilities          | Deamidation (N)        | Score diffs              | Position | Chargem/z | PNP  | strategy_1PNP | strategy_2Conventional | HC strategy_1Conventional | HC strategy_2 |
|-------------|-----------|-----------------------------------|---------------|-----------|------------|------------------------|-----------------------------|----------------------------------------|------------------------|--------------------------|----------|-----------|------|---------------|------------------------|---------------------------|---------------|
| IP100119299 | 385       | ISGKSAVFHRIEGITN                  | YRIGVQHMPGQEI |           | 1          | 126.485                | 126.48                      | SAVFHRIEGITN                           | (126.48)ETVYR          |                          | 12       | 3         | 632  | 1             | 1                      | 1                         | 1             |
| IP100856723 | 311       | ISGNLFINNINKTNGTYRCEASNIVGKAH     |               | 0.999989  | 48.8495    | 148.89                 | VDDQM(x)PQHAVISGPNFINN      | (de)IN(de)KTDN(de)GTYR                 |                        |                          | 26       | 3         | 1131 | 1             | 1                      | 1                         | 1             |
| IP100131143 | 604       | AAFTIDQREAITVGENETYPRAI           | IHWNRAS       |           | 1          | 60.1571                | 175.15                      | EATIVGEN                               | (de)ETVYR              |                          | 8        | 2         | 740  | 1             | 1                      | 1                         | 1             |
| IP100113039 | 90        | NANWRIISQQRISHYNDTYP              | ISPPQRTPGI    |           | 1          | 70.197                 | 165.34                      | ISHYN                                  | (de)DTYPISSPQR         |                          | 5        | 2         | 895  | 1             | 1                      | 1                         | 1             |
| IP100387318 | 297       | RDDIHPTIPAGQYFINI                 | TYNPVHISFDGRK |           | 1          | 56.4677                | 198.49                      | RDDIHPTIPAGQYFIN                       | (de)ITYN(de)YPVHISFDGR |                          | 16       | 3         | 1137 | 1             | 1                      | 1                         | 1             |
| IP100308971 | 740       | DRDAGVGFPEYQEDNSTYNFRWTSYACPE     |               | 0.99988   | 39.192     | 147.17                 | DAGVGFPEYQEDN               | (de)STYNFR                             |                        |                          | 14       | 3         | 780  | 1             | 1                      | 1                         | 1             |
| IP100266264 | 679       | IEQKAITDTGKNAVNTYKNEDECCVRFQY     |               | 0.997174  | 25.564     | 168.1                  | NAVNTYKNEDECCVVR            |                                        |                        |                          | 4        | 2         | 979  | 1             | 1                      | 1                         | 1             |
| IP100876541 | 254       | PGSIHKAENEQVIQNIHNTYKMDYNSFQGTSP  |               | 0.994056  | 22.2333    | 149                    | ANEQVIQNI                   | (de)HTYK                               |                        |                          | 10       | 2         | 837  | 1             | 1                      | 1                         | 1             |
| IP100411025 | 300       | VVSHTVAWSSGRGFNATYHVRGYPWDRP      |               |           | 90.6291    | 117.7                  | GFN                         | (de)ATYHVR                             |                        |                          | 3        | 2         | 533  | 1             | 1                      | 1                         | 1             |
| IP100876541 | 538       | GAESVIMTKSTREWNHTYHCIFRKYNSYSI    |               |           | 58.6993    | 93.839                 | EWN                         | (de)GTYHCIFR                           |                        |                          | 3        | 3         | 495  | 1             | 1                      | 1                         | 1             |
| IP100128249 | 176       | VHTVNTAAAFNTQNGTYFKIVEISRAQNV     |               | 0.981244  | 17.2149    | 141.48                 | CPIITPFFNTQNGTYFKIVEISRAQNV | (de)TAIAAFN(de)TQN(de)N(de)GTYFK       |                        |                          | 28       | 4         | 922  | 1             | 1                      | 1                         | 1             |
| IP100273133 | 582       | DPIEQSVRISCRADNNTYEHIRWRYNIST     |               |           | 85.8127    | 114.86                 | ADN                         | (de)TYEHIR                             |                        |                          | 3        | 2         | 642  | 1             | 1                      | 1                         | 1             |
| IP100858318 | 71        | ISVNAPTPYIKAFYNGTWYRHQPDPDPT      |               |           | 91.8667    | 91.867                 | AFYN                        | (de)GTWYRR                             |                        |                          | 4        | 2         | 668  | 1             | 1                      | 1                         | 1             |
| IP100121378 | 167       | KKIGDCISRSDSPDGNITWYRNGVILQPVEG   |               |           | 63.6623    | 164.15                 | DSYDPGN                     | (de)ITWYRN(de)GK                       |                        |                          | 7        | 3         | 597  | 1             | 1                      | 1                         | 1             |
| IP100122973 | 409       | HVIYGRIDEDTDCIGNWTEGSGQTIKQA      |               |           | 50.2259    | 175.52                 | IDETDCIGN                   | (de)WTEGSGQTIK                         |                        |                          | 9        | 3         | 837  | 1             | 1                      | 1                         | 1             |
| IP100118069 | 37        | IIVQIAGAGIPEKAFNITWISTDFKTIIEWQ   |               |           | 100.187    | 102.97                 | AFN                         | (de)ITWISTDFK                          |                        |                          | 3        | 2         | 722  | 1             | 1                      | 1                         | 1             |
| IP100110808 | 143       | NIIICFDIKFSPVYVNTWLRNGRPTVEGS     |               |           | 137.895    | 137.89                 | FSPVYN                      | (de)VTWIR                              |                        |                          | 7        | 3         | 473  | 1             | 1                      | 1                         | 1             |
| IP100128206 | 296       | PWTLIQHRKDGSDFNENWENYKGFGRIDG     |               |           | 76.0231    | 149.52                 | KDGSQDFN                    | (de)ETWENYK                            |                        |                          | 8        | 2         | 966  | 1             | 1                      | 1                         | 1             |
| IP100119299 | 164       | IIKWNDRGSAIHPHSNATWEIKVQNPRTPEP   |               |           | 71.2794    | 141.85                 | GSAIHPHSN                   | (de)ATWEIK                             |                        |                          | 9        | 2         | 805  | 1             | 1                      | 1                         | 1             |
| IP100314549 | 65        | KIMQDPQQAGGIYCNRTWDGVIOWNDVAAG    |               |           | 186.565    | 186.56                 | IM                          | (ox)QDPIQQAGGIYCN                      | (de)R                  |                          | 15       | 3         | 652  | 1             | 1                      | 1                         | 1             |
| IP100123342 | 862       | QVTFVEVMTTIEKVINDTWAWKNTAIEAQV    |               |           | 87.49      | 283.49                 | VIN                         | (de)DTWAWK                             | (de)ATIAEQ(de)AK       |                          | 3        | 2         | 1032 | 1             | 1                      | 1                         | 1             |
| IP100126253 | 19        | TYDYFWWERIWIYPNITWADIEDKDRGVA     |               |           | 75.9683    | 169.28                 | IWIYPN                      | (de)ITWADIEDKDRG                       |                        |                          | 6        | 3         | 715  | 1             | 1                      | 1                         | 1             |
| IP100111163 | 292       | GKFDVYDAIAGAHPIITVYKEEIPERWHY     |               |           | 154.187    | 203.89                 | FDEVYDAIAGAHPI              | (de)ITVYK                              |                        |                          | 14       | 2         | 1063 | 1             | 1                      | 1                         | 1             |
| IP100110264 | 491       | TWDPVIAERNGHITNYTVYVRDINSQIEIQ    |               |           | 73.4663    | 73.466                 | N                           | (de)GHITN                              | (de)YTVYVR             |                          | 6        | 2         | 720  | 1             | 1                      | 1                         | 1             |
| IP100119063 | 1512      | WRNTIILAKANKWGHNTVYVRTNQPTFDI     |               |           | 83.0451    | 162.48                 | WTGHN                       | (de)YTVYVR                             |                        |                          | 5        | 2         | 649  | 1             | 1                      | 1                         | 1             |
| IP100112032 | 258       | NDIKGSIKIKSAIQNIIVVQKQEQDILISNG   |               |           | 160.524    | 174.95                 | ISQAIQN                     | (de)ITVVQK                             |                        |                          | 7        | 3         | 458  | 1             | 1                      | 1                         | 1             |
| IP100469218 | 160       | NKAYRCVSDIRVYMNKNTVIRDAITQAYIS    |               |           | 73.8853    | 147.91                 | YMN                         | (ox)KN(de)VTVVIR                       |                        |                          | 5        | 3         | 447  | 1             | 1                      | 1                         | 1             |
| IP100331175 | 331       | ANRNFDTCAKMQVSVNGVTTAIVRIFCNGS    |               |           | 136.299    | 161.84                 | M                           | (ox)QVSVN(de)GTVTTAIVR                 |                        |                          | 6        | 3         | 561  | 1             | 1                      | 1                         | 1             |
| IP100123223 | 313       | IQSKKRYEYQIFHVNATVTEEGTIEFERS     |               |           | 79.4397    | 318.66                 | NEYVQIFHVN                  | (de)ATVTEEGTIEFSR                      |                        |                          | 10       | 3         | 914  | 1             | 1                      | 1                         | 1             |
| IP100323134 | 402       | FYGEVPEVRVDIVANIIVTDKQHPHTPAWN    |               |           | 71.5274    | 95.624                 | VDIVAN                      | (de)ITVTDKQHPHTPAWN                    | (de)AAYR               |                          | 7        | 3         | 966  | 1             | 1                      | 1                         | 1             |
| IP100114256 | 72        | KTEIQVNCPKVGNKQVTTATFGYPRIRNQ     |               |           | 69.3307    | 216.72                 | VGVN                        | (de)KN(de)QVTTATFGYPRIR                |                        |                          | 6        | 3         | 668  | 1             | 1                      | 1                         | 1             |
| IP100129677 | 78        | SQIREDIITAIHQVPSNIIVTSTEDQVKAISTQ |               |           | 48.8985    | 216.71                 | QN                          | (de)FSN(de)IVTSTEDQVK                  |                        |                          | 5        | 2         | 856  | 1             | 1                      | 1                         | 1             |
| IP100226932 | 917       | YSPDQVHAERFINYNQVSRMRGIYATPSG     |               |           | 122.691    | 122.69                 | FIN                         | (de)YN(de)QVSR                         |                        |                          | 5        | 2         | 622  | 1             | 1                      | 1                         | 1             |
| IP100320241 | 261       | VKHRIIPERRGDYITVNTVIVEIVGPFEMD    |               |           | 38.9248    | 165.13                 | RGGDIYTN                    | (de)VTVSIVEIVGPFEMD                    | (ox)DITHIDGHK          |                          | 8        | 4         | 866  | 1             | 1                      | 1                         | 1             |
| IP100127406 | 66        | ETEGYRFRFISQAEFFNYVTRIGIGQEWRRG   |               |           | 53.001     | 174.39                 | IISQAEFFN                   | (de)YTVR                               |                        |                          | 9        | 2         | 812  | 1             | 1                      | 1                         | 1             |
| IP100319509 | 106       | PYITPNNQGIYIFQNGNSTRVFTNQITDVI    |               |           | 72.5683    | 222.91                 | VIIRPYITPN                  | (de)N(de)QGIYIFQGN                     | (de)STVR               |                          | 20       | 4         | 692  | 1             | 1                      | 1                         | 1             |
| IP100330632 | 94        | NATKAIIQGIIPPEQNTVQIITAYIKDQESK   |               |           | 76.1546    | 161.35                 | AIIQGIIPPEQN                | (de)YTVQIITAYIKD                       |                        |                          | 13       | 3         | 895  | 1             | 1                      | 1                         | 1             |
| IP100134808 | 227       | GFRIVGSPFICTVNTKNTVPPVSSSPTCEK    |               |           | 62.528     | 191.79                 | IVGSPFICTVNTK               | (de)K                                  |                        |                          | 11       | 3         | 498  | 1             | 1                      | 1                         | 1             |
| IP100653675 | 647       | SCHGDSGGAFAPVNPVYKPYAGIVSWG       |               |           | 56.0552    | 84.946                 | GVDSCHGDSGGAFAPVNPV         | (de)YVTPK                              |                        |                          | 19       | 3         | 816  | 1             | 1                      | 1                         | 1             |
| IP100409148 | 256       | MIPVADQDKCVVHYENSTVPEKNIITSPVGV   |               |           | 103.263    | 235.73                 | YVMPVADQDKCVVHYEN           | (de)STVPEK                             |                        |                          | 18       | 3         | 989  | 1             | 1                      | 1                         | 1             |
| IP100125813 | 679       | YMGIPPEDNIDHRYNSTVMSRAEHFQVEY     |               |           | 54.3685    | 106.16                 | YMGIPPEDN                   | (de)IDHRYN                             | (de)STVM(ox)SR         |                          | 16       | 3         | 881  | 1             | 1                      | 1                         | 1             |
| IP100322463 | 183       | DTVWFKICPHFAMIGNDVMCTEGQNWTRIP    |               |           | 87.5088    | 136.68                 | CIPHAMIGN                   | (de)WTRIPCEIEVK                        |                        |                          | 10       | 4         | 936  | 1             | 1                      | 1                         | 1             |
| IP100123925 | 679       | FMGIPKDDNIIEHYKNSTMARAEIFRNVQY    |               | 0.999604  | 34.0229    | 94.057                 | FM                          | (ox)GIPKDDNIIEHYKN                     | (de)STVM(ox)AR         |                          | 16       | 3         | 867  | 1             | 1                      | 1                         | 1             |
| IP100658311 | 153       | FHVHPVTPQPIQVNTNITVKEIDSVTITCIS   |               |           | 193.19     | 199.01                 | FHVHPVTPQPIQVNTN            | (de)TTVK                               |                        |                          | 16       | 3         | 775  | 1             | 1                      | 1                         | 1             |
| IP100108535 | 333       | ITVIEPTQPIQVNTNITVKEIDSVTITCIS    |               |           | 69.98      | 192.27                 | ITVIEPTQPIQVNTN             | (de)TTVK                               |                        |                          | 21       | 4         | 694  | 1             | 1                      | 1                         | 1             |
| IP100134808 | 275       | KATYTHDRSRLACINGTIRGRHVEICQNG     |               |           | 104.523    | 180.07                 | IACIN                       | (de)GTVIR                              |                        |                          | 5        | 2         | 559  | 1             | 1                      | 1                         | 1             |
| IP100317356 | 324       | NIISSEPKIIVVYAENGTIQGTTVASVYK     |               |           | 67.3964    | 217.86                 | ITVYAEN                     | (de)GTVYK(de)GTTVASVYK                 |                        |                          | 8        | 3         | 772  | 1             | 1                      | 1                         | 1             |
| IP100320618 | 53        | CSHIKITHIPDDIPSNITVINITHNQIR      |               |           | 69.5832    | 153.25                 | ITHIPDDIPSN                 | (de)ITVIN                              | (de)ITHNQIR            |                          | 11       | 3         | 876  | 1             | 1                      | 1                         | 1             |
| IP100467600 | 2400      | HHTTNVNSFYDDIIVNGTIVIKRISQRIIT    |               |           | 71.1476    | 181.54                 | DIEHHTN                     | (de)VNFYDDIIVN                         | (de)GTVIK              |                          | 19       | 3         | 916  | 1             | 1                      | 1                         | 1             |
| IP100405742 | 1072      | VVIFISPAVPEPEAYNITVIRDMGHPCARIP   |               |           | 70.8373    | 171.98                 | VVIFISPAVPEPEAYN            | (de)ITVIR                              |                        |                          | 16       | 4         | 615  | 1             | 1                      | 1                         | 1             |
| IP100108535 | 317       | FVNSVGTISRTTVKNIIVIEPVTQPIQVT     |               |           | 69.98      | 192.27                 | ITVKN                       | (de)ITVIEPTQPIQVNTN                    | (de)TTVK               |                          | 5        | 4         | 694  | 1             | 1                      | 1                         | 1             |
| IP100228567 | 101       | KVIVFSEDEGYFIRAWNYVDTPHGMFVSGTP   |               |           | 55.3139    | 127.2                  | AWN                         | (de)YVDTPHGMVSGTPPEQSVMITDVGSGPYGHTVVK |                        |                          | 3        | 5         | 863  | 1             | 1                      | 1                         | 1             |
| IP100121550 | 266       | IQPKYIQPIIAYQFTNITVDTEIRVECKAYG   |               |           | 70.4517    | 288.25                 | YIQPIIAYQFTN                | (de)ITVDTEIRVECK                       |                        |                          | 12       | 3         | 951  | 1             | 1                      | 1                         | 1             |
| IP100119063 | 240       | PTSTRQTAMDFSYANETVWVHGSDSAAGT     |               |           | 36.483     | 48.759                 | QTTAM                       | (ox)DFSYAN                             | (de)ETVWVHGSDSAAGTQIK  |                          | 11       | 3         | 1092 | 1             | 1                      | 1                         | 1             |
| IP100128399 | 79        | RFAPPQAPAEPSWSSKNATTYPPMCSQDAAR   |               |           | 67.3255    | 124.16                 | N                           | (de)ATTYPPM(ox)CSQDAAR                 |                        |                          | 1        | 2         | 850  | 1             | 1                      | 1                         | 1             |
| IP100649186 | 187       | CFAIHASKGVIMVNETTYEDGHGARKNIT     |               |           | 55.8813    | 245.19                 | GVIM                        | (ox)VGN                                | (de)ETTYEDGHGARKN      | (de)ITDIIVEGAK           | 7        | 3         | 1031 | 1             | 1                      | 1                         | 1             |
| IP100225072 | 169       | FMNYSVSSVFKERIGNVTTWISSNPVYFA     |               |           | 48.1796    | 52.707                 | IGN                         | (de)VTTWISSN                           | (de)PPVFAAIYWEEDVDSGHK |                          | 3        | 3         | 1136 | 1             | 1                      | 1                         | 1             |
| IP100123342 | 515       | GIFGDPEDIRVFSQNIITVYKIGVGSFKK     |               |           | 81.9197    | 98.407                 | VFGSQN                      | (de)ITTVKIK                            |                        |                          | 6        | 3         | 479  | 1             | 1                      | 1                         | 1             |
| IP100467600 | 1750      | NIITVPGKASGRVILINITVAANHGVTFSK    |               |           | 66.0588    | 218.28                 | VILIN                       | (de)ITVAAN                             | (de)HGYTK              |                          | 4        | 3         | 573  | 1             | 1                      | 1                         | 1             |
| IP100108849 | 320       | GAFKTKVHDGDFEYNIITTTIAAINKIRIFK   |               |           | 98.0604    | 138.66                 | TGVDHGDFFEYN                | (de)ITTTIAAINK                         |                        |                          | 11       | 3         | 761  | 1             | 1                      | 1                         | 1             |
| IP100318175 | 413       | IDQDFVYSPTFQDIINRITGRTGWYKDIH     |               |           | 95.2051    | 97.32                  | M                           | (ox)PPFIDQDFVYSPTFQDIIN                | (de)R                  |                          | 14       | 3         | 854  | 1             | 1                      | 1                         | 1             |
| IP100322304 | 134       | TRYSNESQDISVNGYNTCTSSVSSAIR       |               |           | 120.33     | 120.33                 | YSN                         | (de)ESQDISVN                           | (de)GYN                | (de)CTSSVSSAIR           | 20       | 3         | 915  | 1             | 1                      | 1                         | 1             |
| IP100230319 | 140       | NDISSHNSTICTIENQNTSITGTSPEIMEK    |               |           | 50.4134    | 115.47                 | YATEN                       | (de)DISSHN                             | (de)STIICIVN           | (de)QTTSSITGTSPEIM(ox)EK | 10       | 4         | 969  | 1             | 1                      | 1                         | 1             |
| IP100130654 | 402       | RENPGCYRHVEDKFNETTQRSIAMVQJCEK    |               |           | 82.2607    | 176.18                 | HVEDKFN                     | (de)ETTTQ                              | (de)R                  |                          | 7        | 3         | 503  | 1             | 1                      | 1                         | 1             |
| IP100316469 | 613       | VMSWWDYGYGIAGMANRITVDNNWNSHI      |               |           | 121.188    | 220.21                 | VMSWWDYGYGIAGMAN            | (R)                                    |                        |                          | 16       | 2         | 1041 | 1             | 1                      | 1                         | 1             |
| IP100850413 | 234       | YMNWNYMILNARHINITTISVAGFRDYQV     |               |           | 82.5294    | 171.26                 | HIN                         | (de)ITTISVAGFR                         |                        |                          | 3        | 2         | 744  | 1             | 1                      | 1                         | 1             |
| IP100127447 | 105       | TYREIRNKANIQGGENGTTISAVTNKAYVFE   |               |           | 77.8819    | 263.55                 | N                           | (de)KANIQFGEN                          | (de)GTTISAVTNK         |                          | 10       | 2         | 1055 | 1             | 1                      | 1                         | 1             |
| IP100349830 | 235       | RINSAPVEGYSEHVNKTTIRMTYPEGAPIS    |               |           | 79.88      | 205.68                 | IN                          | (de)SAPVEGYSEHVN                       | (de)KTTIR              |                          | 15       | 3</       |      |               |                        |                           |               |

|             |      |                                    |          |         |        |         |                                                     |                                                                     |                                         |    |      |      |   |   |   |
|-------------|------|------------------------------------|----------|---------|--------|---------|-----------------------------------------------------|---------------------------------------------------------------------|-----------------------------------------|----|------|------|---|---|---|
| IPI00406901 | 74   | SQHRVIFVYKDDAMVYVNTSREHTESYVIPA    | 1        | 74.4284 | 74.769 | 74.428  | _VIFYKDDAM(ox) VYN(de) VTSR_                        | VIFYKDDAMVYN(1) VTSR                                                | VIFYKDDAMVYN(74.43) VTSR                | 12 | 2    | 969  | 1 | 1 | 1 |
| IPI00466652 | 197  | DFINHSSARGVSSSENFTSPVMEFWERRVIG    | 1        | 74.7718 | 188.04 | 74.772  | _GVSSSEN(de) FTSPVM(ox) EFWERR                      | GVSSSEN(1) FTSPVMEFWERR                                             | GVSSSEN(74.77) FTSPVMEFWERR             | 12 | 3    | 755  | 1 | 1 | 1 |
| IPI00409148 | 264  | KCVVHVENSTVPEKKNITSVPVGVQPI NEHT   | 1        | 68.2351 | 123.36 | 123.36  | _KN(de) ITSPVGVQPI NEHTFCAGITK_                     | KN(1) ITSPVGVQPI NEHTFCAGITK                                        | KN(68.24) ITSPVGVQPI IN(-68.24)         | 2  | 3    | 876  | 1 | 1 | 1 |
| IPI00132474 | 212  | STTPAKIRNPNCTSEQNCNTPSFPYKNVISITD  | 1        | 96.7715 | 168.08 | 152.32  | _NPCTSEQN(de) CTSPFSYK                              | NPCTSEQN(1) CTSPFSYK                                                | N(-96.77) NPCTSEQN(96.77) CTSPF         | 8  | 2    | 961  | 1 | 1 | 1 |
| IPI00125182 | 368  | CWWRISVTPGEKIIINFTSMDIYRSRIGWYD    | 1        | 80.5221 | 101.89 | 80.522  | _I IIN(de) FTSM(ox) DIYR                            | I IIN(1) FTSMDIYR                                                   | I IIN(80.52) FTSMDIYR                   | 4  | 2    | 752  | 1 | 1 | 1 |
| IPI00121776 | 61   | MYNNWNRIPSSJENATSISIMNITGTAI C     | 1        | 59.046  | 61.499 | 59.046  | _IPSSJEN(de) ATISISIMN(ox) N(de) ITGTAICHISDIPDPGIR | IPSSJEN(1) ATISISIMN(1) ITGTAICHISDIPDPGIR                          | IPSSJEN(59.05) ATISISIMN(59.05)         | 7  | 4    | 879  | 1 | 1 | 1 |
| IPI00228719 | 257  | SHAGMVQVAIQTFGNQTSIPAGGAGVYKI      | 1        | 56.7083 | 356.04 | 56.708  | _QVAIQTFGN(de) QTSIIPAGGAGYK                        | QVAIQTFGN(1) QTSIIPAGGAGYK                                          | QVAIQTFGN(56.71) QTSIIPAGGAGYK          | 9  | 3    | 741  | 1 | 1 | 1 |
| IPI00115793 | 117  | PPFGIFVDFRNTGEINITSIDREETPYFII     | 0.999901 | 40.0535 | 179.33 | 179.33  | _NTEGEIN(de) ITSIDREETPYFIITGYAIDSR                 | NTEGEIN(1) ITSIDREETPYFIITGYAIDSR                                   | N(-40.05) TGEIN(40.05) ITSIDIR          | 6  | 3    | 1102 | 1 | 1 | 1 |
| IPI00121190 | 444  | RTKQHQQFSIAVVGINITSIGRSIKEISDG     | 1        | 57.6158 | 107.03 | 57.616  | _QHQQFSIAVVGIN(de) ITSIGIR                          | QHQQFSIAVVGIN(1) ITSIGIR                                            | QHQQFSIAVVGIN(57.62) ITSIGIR            | 13 | 3    | 704  | 1 | 1 | 1 |
| IPI00137599 | 176  | EAIKIAYCEERCNCNITSIEDEDFCKTVTS     | 1        | 67.1935 | 280.7  | 280.7   | _CGNKN(de) ITSIEDEDFCK                              | CGNKN(1) ITSIEDEDFCK                                                | CGN(-67.19) CN(67.19) ITSIEDED          | 5  | 2    | 982  | 1 | 1 | 1 |
| IPI00410796 | 392  | IGHYKPDITAVVIENTSIRDRII IDIST      | 1        | 78.3239 | 88.396 | 78.324  | _KPIIGHYKPDITAVVIEN(de) GTSIDR                      | KPIIGHYKPDITAVVIEN(1) GTSIDR                                        | KPIIGHYKPDITAVVIEN(78.32) GTS           | 18 | 3    | 880  | 1 | 1 | 1 |
| IPI00876558 | 524  | MASGTWNPKGPDISNCTSHHVNQIAQKIRS     | 1        | 64.9411 | 182.02 | 182.02  | _GPDISN(de) CTSHHVNQIAQK                            | GPDISN(1) CTSHHVNQIAQK                                              | GPDISN(64.94) CTSHHVN(-64.94)           | 6  | 3    | 686  | 1 | 1 | 1 |
| IPI00321375 | 335  | IAQVATNPQGITGTGNITSEMDPSSHRRPKI    | 1        | 99.0645 | 186.96 | 99.064  | _GHIIIAQVATN(de) PQGITGTGN(de) TTSEM(ox) DPSHR      | GHIIIAQVATN(1) PQGITGTGN(1) TTSEGHIIIAQVATN(99.06) PQGITGTGN(99.06) | 20                                      | 3  | 1041 | 1    | 1 | 1 |   |
| IPI00122399 | 577  | KCQGDASRICHTHGWNETSEIMPPGAVFSCI    | 1        | 55.7342 | 55.734 | 55.734  | _ICHTHGWN(de) ETSEIM(ox) PPGAVFSCIYR                | ICHTHGWN(1) ETSEIMPPGAVFSCIYR                                       | ICHTHGWN(55.73) ETSEIMPPGAVFSCI         | 8  | 3    | 994  | 1 | 1 | 1 |
| IPI00113528 | 172  | KKIEIGFGNRIVDVNIITSEGGKVI VNPNTKI  | 1        | 96.8656 | 154.36 | 96.866  | _IVDVN(de) ITSEGGVK                                 | IVDVN(1) ITSEGGVK                                                   | IVDVN(96.87) ITSEGGVK                   | 5  | 2    | 702  | 1 | 1 | 1 |
| IPI01026704 | 1007 | GHPMPFELRIALISFPNITSDGVPYIYPTGWS   | 1        | 76.7951 | 164.31 | 164.31  | _LAISFPN(de) ITSDGVPYIYPTGWS                        | LAISFPN(1) ITSDGVPYIYPTGWS                                          | LAISFPN(76.8) ITSDGVPYIYPTGWS           | 7  | 3    | 1196 | 1 | 1 | 1 |
| IPI00330632 | 1389 | VDCKEVGQKAINASANITSDGVEVIGRMVRS    | 1        | 103.17  | 207.76 | 103.17  | _AIN(de) ASAN(de) ITSDGVEVIGR                       | AIN(1) ASAN(1) ITSDGVEVIGR                                          | AIN(103.17) ASAN(103.17) ITSDG          | 7  | 2    | 895  | 1 | 1 | 1 |
| IPI00131881 | 279  | SGIRNIFPMVKRIRINTTSEDEKPTNPRFRP    | 1        | 107.656 | 173.71 | 173.71  | _IN(de) TTSDEKPTNPRFRP                              | IN(1) TTSDEKPTNPRFRP                                                | IN(107.66) TTSDEKPTN(-107.66)           | 2  | 5    | 868  | 1 | 1 | 1 |
| IPI00124221 | 124  | DIESFIPKPYVVEEQKNITSCDPGAPFIQHGP   | 1        | 49.2085 | 97.312 | 49.209  | _IVEDIESFIPKPYVEEQKN(de) ITSCDPGAPFIQHGP            | IVEDIESFIPKPYVEEQKN(1) ITSCDPGAPFIQHGP                              | IVEDIESFIPKPYVEEQKN(49.21) IT           | 19 | 2    | 857  | 1 | 1 | 1 |
| IPI00387318 | 98   | TGTEPSSPCNKISPNVTSACTINFTIKQS      | 1        | 172.496 | 224.86 | 172.5   | _CISPN(de) VTSACTIN(de) FTIK                        | CISPN(1) VTSACTIN(1) FTIK                                           | CISPN(172.5) VTSACTIN(172.5)            | 5  | 2    | 1044 | 1 | 1 | 1 |
| IPI00467180 | 104  | VSHTVVIRPIKAGYFNFTSATIYYIAQEDGP    | 1        | 88.5435 | 138.88 | 88.544  | _AGYFN(de) FTSATIYYIAQEDGP                          | AGYFN(1) FTSATIYYIAQEDGP                                            | AGYFN(88.54) FTSATIYYIAQEDGP            | 5  | 4    | 965  | 1 | 1 | 1 |
| IPI00119039 | 153  | HKGKVVMDIPYEIWNETSIAEVADIKKQCV     | 1        | 72.1837 | 135.38 | 72.184  | _VVM(ox) DIPYEIWN(de) ETSAEVADIK                    | VVM(1) DIPYEIWN(1) ETSAEVADIK                                       | VVM(1) DIPYEIWN(72.18) ETSAEVADIK       | 11 | 4    | 643  | 1 | 1 | 1 |
| IPI00131216 | 276  | TRPIAEKIAVIGCKNNTSAAVHICIRKQTE     | 1        | 90.697  | 117.93 | 90.697  | _N(de) TTSAAM(ox) VHICIR                            | N(1) TTSAAMVHICIR                                                   | N(90.7) TTSAAMVHICIR                    | 1  | 2    | 689  | 1 | 1 | 1 |
| IPI00469218 | 102  | ITFGRGYIIITNFKNTRYSVQHMVFTYNI      | 1        | 65.0429 | 296.22 | 65.043  | _GYLIITIN(de) FTKN(de) TTR                          | GYLIITIN(1) FTKN(1) TTR                                             | GYLIITIN(65.04) FTKN(65.04) TTR         | 11 | 2    | 822  | 1 | 1 | 1 |
| IPI00321375 | 105  | GVQIIVFPEDGIHGFnFTRTSIPPFDMP       | 1        | 88.7296 | 160.43 | 88.73   | _GVQ(de) IIVFPEDGIHGFn(de) FTR                      | GVQIIVFPEDGIHGFn(1) FTR                                             | GVQIIVFPEDGIHGFn(88.73) FTR             | 16 | 3    | 717  | 1 | 1 | 1 |
| IPI00113750 | 290  | HWEIDIDIEKIIVHPNYTRSSDNDIATIRI     | 1        | 83.499  | 175.15 | 83.499  | _EIIVHPN(de) YTR                                    | EIIVHPN(1) YTR                                                      | EIIVHPN(83.5) YTR                       | 7  | 3    | 415  | 1 | 1 | 1 |
| IPI00120674 | 696  | DPRGRSIRAFDETKNTRRRTPVGMIGKQV      | 0.995914 | 23.8688 | 141.08 | 138.76  | _AFFDETKN(de) NTR                                   | AFFDETKN(0.996) N(0.004) TR                                         | AFFDETKN(23.87) N(-23.87) TR            | 8  | 2    | 672  | 1 | 1 | 1 |
| IPI00120245 | 704  | NNEAIARISCAFKNENQTRQVCDIGNPKA      | 1        | 134.562 | 134.56 | 134.56  | _ISCAFKNEN(de) QTR                                  | ISCAFKNEN(1) QTR                                                    | ISCAFKNEN(134.56) QTR                   | 9  | 2    | 728  | 1 | 1 | 1 |
| IPI00154056 | 167  | IKFPGCPRYEQINQTRQTPPEQNRSIQN       | 1        | 106.291 | 106.29 | 106.29  | _YEIQN(de) ETR                                      | YEIQN(1) ETR                                                        | YEIQN(106.29) ETR                       | 6  | 2    | 591  | 1 | 1 | 1 |
| IPI00133500 | 44   | NVIFPPHTTPKAEISNHTRPVIIVPGCIGNR    | 1        | 88.3601 | 133.45 | 88.3601 | _AETSN(de) HTRPVIIVPGCIGNR                          | AETSN(1) HTRPVIIVPGCIGNR                                            | AETSN(88.36) HTRPVIIVPGCIGNR(-)         | 5  | 3    | 735  | 1 | 1 | 1 |
| IPI00319509 | 573  | TGEISQKHFI LDKSNVTRPSEFNWIWIPI     | 1        | 109.717 | 137.14 | 109.72  | _SN(de) VTRPSEFN(de) YWIWIPI                        | SN(1) VTRPSEFN(1) YWIWIPI                                           | SN(109.72) VTRPSEFN(109.72) YI          | 2  | 2    | 1248 | 1 | 1 | 1 |
| IPI00108535 | 206  | DRKIRISEGNRTIITINVRNDITGPVVCETR    | 1        | 111.064 | 238.19 | 111.06  | _TIITIN(de) VTRN(de) DTGPVVCETR                     | TIITIN(1) VTRN(1) DTGPVVCETR                                        | TIITIN(111.06) VTRN(111.06) DT          | 6  | 3    | 776  | 1 | 1 | 1 |
| IPI00153468 | 117  | FTSHTPDHQI CIIHNSRMAIFAGKIRVH      | 1        | 68.4105 | 197.67 | 68.41   | _FTSHTPDHQI CIIHNSN(de) STR                         | FTSHTPDHQI CIIHNSN(1) STR                                           | FTSHTPDHQI CIIHNSN(68.41) STR           | 18 | 3    | 816  | 1 | 1 | 1 |
| IPI00404551 | 261  | GGTDSKYHGEISYINVTTRKAYVQHMDQTE     | 1        | 110.306 | 203.7  | 110.31  | _YHGEISYIN(de) VTRK                                 | YHGEISYIN(1) VTRK                                                   | YHGEISYIN(110.31) VTRK                  | 10 | 3    | 582  | 1 | 1 | 1 |
| IPI00130573 | 521  | PDMEIFRIRFANEYPNITRISYIGKSVESRE    | 0.999999 | 60.3787 | 134.99 | 134.99  | _RFANEYPN(de) ITR                                   | RFANEYPN(1) ITR                                                     | RFAN(-60.38) EYPN(60.38) ITR            | 8  | 2    | 691  | 1 | 1 | 1 |
| IPI00322463 | 193  | FAMILGNDVMTCEQGNWTRIPCEIYKCPPP     | 1        | 87.5088 | 136.68 | 87.509  | _CIPHFAM(ox) IGN(de) DTMV(ox) CTEQGN(de) WTRIPCEIYK | CIPHFAM(1) DTMVCEQGN(1) WTRIPCEIYK                                  | CIPHFAM(87.51) DTMVCEQGN(87.51)         | 24 | 4    | 936  | 1 | 1 | 1 |
| IPI00749655 | 700  | FCIIDVMSGSSVGNATRIAHQIHQRIRKS      | 1        | 90.9116 | 90.912 | 90.912  | _ICEGRFClDVMSTGSSVGN(de) ATR                        | ICEGRFClDVMSTGSSVGN(1) ATR                                          | ICEGRFClDVMSTGSSVGN(90.91)              | 22 | 3    | 917  | 1 | 1 | 1 |
| IPI00132189 | 117  | NTQADV INASWSVSNSTRHEIERSDFCCGI    | 1        | 113.21  | 263.55 | 141.6   | _NTQADV IN(de) ASWSVSN(de) STRHEIER                 | NTQADV IN(1) ASWSVSN(1) STRHEIER                                    | NTQADV IN(-104.43) TQADV IN(104.43) ASW | 16 | 3    | 910  | 1 | 1 | 1 |
| IPI00125813 | 614  | QDVQMPKSKIDFIVNETRWFYQMIIPPHFD     | 1        | 86.0142 | 129.37 | 86.014  | _KIDFIVIN(de) ETR                                   | KIDFIVIN(1) ETR                                                     | KIDFIVIN(86.01) ETR                     | 8  | 3    | 450  | 1 | 1 | 1 |
| IPI00134585 | 373  | YEGGTWDAIAEAISSNHRFSAADRSFIDD      | 1        | 85.0562 | 153.65 | 123.43  | _VNYEGGTWDAIAEAISSN(de) HTR                         | VNYEGGTWDAIAEAISSN(1) HTR                                           | VN(-85.06) YEGGTWDAIAEAISSN(8)          | 18 | 3    | 803  | 1 | 1 | 1 |
| IPI01026704 | 531  | GTEEEQKQVYVAVNQTREYQMSIEPIKQ       | 1        | 80.1016 | 94.692 | 80.102  | _VYVAVN(de) QTR                                     | VYVAVN(1) QTR                                                       | VYVAVN(80.1) QTR                        | 7  | 2    | 607  | 1 | 1 | 1 |
| IPI00307966 | 104  | IISTFKGAFVSKNPCNITREYAPIVIVTQ      | 0.998733 | 28.9665 | 174.87 | 139.48  | _GAFVSKNPCN(de) ITR                                 | GAFVSKN(0.001) PCN(0.999) ITR                                       | GAFVSKN(-28.97) PCN(28.97) ITR          | 10 | 2    | 733  | 1 | 1 | 1 |
| IPI00123040 | 415  | IQARRIADWESIGYNI TRCHTFNVTICYHY    | 1        | 151.994 | 170.66 | 151.99  | _RIADWESIGYN(de) ITR                                | RIADWESIGYN(1) ITR                                                  | RIADWESIGYN(151.99) ITR                 | 12 | 3    | 599  | 1 | 1 | 1 |
| IPI00129250 | 318  | ICRWIVANRNMFSQNDTRCAGPEAKGQRI      | 1        | 87.3076 | 138.4  | 87.308  | _M(ox) FSNQ(de) DTR                                 | M(1) DTR                                                            | MFSQN(87.31) DTR                        | 5  | 2    | 508  | 1 | 1 | 1 |
| IPI00123342 | 922  | NKAKFTKPRFRPKDKNGTAEPPINASAGDQ     | 1        | 112.549 | 112.55 | 112.55  | _DKN(de) GTRAEPPIIN(de) ASAGDQEEK                   | DKN(1) GTRAEPPIIN(1) ASAGDQEEK                                      | DKN(112.55) GTRAEPPIIN(112.55)          | 3  | 2    | 1115 | 1 | 1 | 1 |
| IPI00125813 | 144  | YDVNKRQIITEEKIPNNTQWITWSPGEGKIA    | 1        | 76.0266 | 257.73 | 76.027  | _QIITEEKIPN(de) N(de) TQWITWSPGEGK                  | QIITEEKIPN(1) N(1) TQWITWSPGEGK                                     | QIITEEKIPN(76.03) N(76.03) TQW          | 10 | 3    | 918  | 1 | 1 | 1 |
| IPI00469426 | 379  | ANTGEGPQRNKVFKTNSQVSDVRAMINASIS    | 1        | 150.111 | 150.11 | 150.11  | _VFKTN(de) STQVSDVR                                 | VFKTN(1) STQVSDVR                                                   | VFKTN(150.11) STQVSDVR                  | 5  | 2    | 741  | 1 | 1 | 1 |
| IPI00116744 | 300  | ISHLVDPKDI EPPRAANCTQVIVWHTREKPK   | 1        | 117.916 | 148.57 | 117.92  | _AAN(de) CTQVIVWHTR                                 | AAN(1) CTQVIVWHTR                                                   | AAN(117.92) CTQVIVWHTR                  | 3  | 3    | 520  | 1 | 1 | 1 |
| IPI00406302 | 101  | SKGDHITQIIEG IQFNITQTSIADIHKSFGH   | 1        | 40.81   | 193.42 | 40.81   | _GDHITQIIEG IQFN(de) ITQTSIADIHK                    | GDHITQIIEG IQFN(1) ITQTSIADIHK                                      | GDHITQIIEG IQFN(40.81) ITQTSIADIH       | 14 | 4    | 700  | 1 | 1 | 1 |
| IPI00625835 | 135  | SPTSNISSNFIC IENRTQIKPTQDPTECV     | 1        | 135.211 | 184.68 | 135.21  | _YKYETTISPTSIN(de) ISSN(de) SFICIEN(de) R           | YKYETTISPTSIN(1) ISSN(1) SFICIEN                                    | YKYETTISPTSIN(135.21) ISSN(135)         | 2  | 3    | 943  | 1 | 1 | 1 |
| IPI00110910 | 46   | ERHFVVQFKGGECCYNTGTQRRIRVTRYINR    | 1        | 107.166 | 197.07 | 107.17  | _GECYTN(de) GTQR                                    | GECYTN(1) GTQR                                                      | GECYTN(107.17) GTQR                     | 7  | 2    | 675  | 1 | 1 | 1 |
| IPI00123223 | 993  | NMIFANPNIYIKYINETQIQTKIKTKAIG      | 1        | 110.51  | 162.68 | 110.51  | _YIN(de) ETQQIQTKIK                                 | YIN(1) ETQQIQTKIK                                                   | YIN(110.51) ETQQIQTKIK                  | 3  | 2    | 804  | 1 | 1 | 1 |
| IPI00621027 | 155  | IRSFRRGFTDCAIANMTQIQIRHQVKGQVYN    | 1        | 123.023 | 279.44 | 123.02  | _RGTFTDCAIAN(de) M(ox) TQQIR                        | RGTFTDCAIAN(1) MTQQIR                                               | RGTFTDCAIAN(123.02) MTQQIR              | 11 | 3    | 667  | 1 | 1 | 1 |
| IPI00123704 | 238  | IDIMYPFYQKGFHVNTQPIVAVKFINVTP      | 1        | 80.2447 | 118.24 | 80.245  | _FHVN(de) YTPQIVAVK                                 | FHVN(1) YTPQIVAVK                                                   | FHVN(80.24) YTPQIVAVK                   | 4  | 3    | 506  | 1 | 1 | 1 |
| IPI00987886 | 409  | GTCIQVQPQDGHGKNQTNQIKSSGGQYIM      | 0.999995 | 52.5913 | 115.12 | 115.12  | _GHICN(de) QTNQIKSS                                 | GHICN(1) QTNQIKSS                                                   | GHICN(52.59) QTNQ(-52.59) IQSS          | 5  | 3    | 539  | 1 | 1 | 1 |
| IPI00894972 | 444  | QQVILFQAPAEAGGRWNQTKIEG TIIGSYFQ   | 1        | 93.6838 | 93.684 | 93.684  | _YQHVGQVILFQAPAEAGGRWN(de) QTKQ                     | YQHVGQVILFQAPAEAGGRWN(1) QTKQ                                       | YQHVGQVILFQAPAEAGGRWN(93.68) Q          | 20 | 4    | 690  | 1 | 1 | 1 |
| IPI00310090 | 201  | RFYEEFPI INKRTGEANIQT IYTQEAIDFIQT | 1        | 254.399 | 254.4  | 254.4   | _TGEAN(de) ITQIYTYQEAIDFIQTQHAR                     | TGEAN(1) ITQIYTYQEAIDFIQTQHAR                                       | TGEAN(254.4) ITQIYTYQEAIDFIQTQ          | 5  | 3    | 917  | 1 | 1 | 1 |
| IPI00310567 | 254  | IAHEIHVIEKQPMNIITQIKVIQIGTIVDN     | 1        | 54.5594 | 142.23 | 54.559  | _YVYVADIAHEIHVIEKQPMN(de) M(ox) N(de) ITQIK         | YVYVADIAHEIHVIEKQPMN(1) MN(1) YVYVADIAHEIHVIEKQPMN(54.56) M         | 22                                      | 4  | 800  | 1    | 1 | 1 |   |
| IPI00474580 | 46   | RPRFIEYVTSCECHFYNGTQHVRFRIFRYNR    | 1        | 111.659 | 115.8  | 111.66  | _FIEYVTSCECHFYN(de) GTQHR                           | FIEYVTSCECHFYN(1) GTQHR                                             | FIEYVTSCECHFYN(111.66) GTQHR            | 13 | 2    | 1195 | 1 | 1 | 1 |
| IPI00129526 | 817  | AFIVADKIVTSKHNDTQHIWESDNEFSV       | 1        | 62.6482 | 200.99 | 62.648  | _HN(de) N(de) DTQHIWESDNI(de) EFSVIADPR             | HN(1) N(1) DTQHIWESDNI(1) EFSVIADPR                                 | HN(62.65) N(62.65) DTQHIWESDNI          | 3  | 3    | 905  | 1 | 1 | 1 |
| IPI00312711 | 214  | IISIDDPQRGMILINDTQHFSNNVKGIEGQ     | 1        | 71.2794 | 94.02  | 71.279  | _GIM(ox) I IIN(de) DTQHFSN(de) N(de) VK             | GIMI IIN(1) DTQHFSN(1) N(1) VK                                      | GIMI IIN(71.28) DTQHFSN(71.28)          | 7  | 3    | 655  | 1 | 1 | 1 |
| IPI00121240 | 187  | IPPIDIVREFKASVNVVTHCTMESWESMNE     | 1        | 46.9529 | 143.04 | 46.953  | _ASVYN(de) VTQHCTM(ox) ESWESM(ox) N(de) EVAR        | ASVYN(1) VTQHCTMESWESM(1) EVAR                                      | ASVYN(46.95) VTQHCTMESWESM(4)           | 5  | 3    | 900  | 1 | 1 | 1 |
| IPI00131168 | 150  | SIMKTWANFAKYGHNPNGTGNSTWVPVFTST    | 1        | 108.18  | 108.18 | 108.18  | _YGHPN(de) GTQGN(de) STM(ox) WVPVFTSTEQK            | YGHPN(1) GTQGN(1) STMWVPVFTSTEQK                                    | YGHPN(108.18) GTQGN(108.18) ST          | 5  | 3    | 862  | 1 | 1 | 1 |
| IPI00135635 | 814  | QQPTEATKIINDYVSNQTMGMIKKI ISEIDD   | 1        | 107.15  | 211.7  | 211.7   | _IINDVSN(de) QTMGMI(ox) IK                          | IINDVSN(1) QTMGMIK                                                  | IIN(-107.15) DVSN(107.15) QTQ           | 8  | 2    | 871  | 1 | 1 | 1 |
| IPI00131830 | 185  | QQPTEAKNIINDYVSNQTMGMIKKI ISEI     | 1        | 124.458 | 250.52 | 124.46  | _N(de) I IIN(de) DVYSN(de) QTMGMI(ox) IK            | N(1) IIN(1) DVYSN(1) QTMGMIK                                        | N(124.46) IIN(124.46) DVYSN(124)        | 9  | 2    | 929  | 1 | 1 | 1 |
| IPI00116105 | 169  |                                    |          |         |        |         |                                                     |                                                                     |                                         |    |      |      |   |   |   |











|             |      |                                    |          |         |        |        |                                                          |                                                                           |                                 |   |      |     |   |   |   |   |
|-------------|------|------------------------------------|----------|---------|--------|--------|----------------------------------------------------------|---------------------------------------------------------------------------|---------------------------------|---|------|-----|---|---|---|---|
| IPI00129485 | 75   | EDTVTITCEGTHNPGNSSTQWFHNGRSIRSQ    | 1        | 66.1369 | 199.99 | 66.137 | EDTVTITCEGTHN (de) PGN (de) SSTQWFHN (de) GR             | EDTVTITCEGTHN (1) PGN (1) SSTQWFHN (de) EDTVTITCEGTHN (66.14) PGN (66.14) | 16                              | 3 | 983  | 1   | 1 | 1 | 1 |   |
| IPI00122257 | 335  | ATIKADINQRWIKIDNYSSTQEIIGRTIIVYIDG | 1        | 90.7928 | 190.85 | 90.793 | _IKIDN (de) YSTQEIGR                                     | IKIDN (1) YSTQEIGR                                                        | 5                               | 3 | 513  | 1   | 1 | 1 | 1 |   |
| IPI01023131 | 137  | F1YDFNSYWRVHSGNFSTIPQYFKNGYVT      | 1        | 54.0231 | 69.345 | 54.023 | _VHSGN (de) FSTIPQYFK                                    | VHSGN (54.02) FSTIPQYFK                                                   | 5                               | 1 | 543  | 1   | 1 | 1 | 1 |   |
| IPI00124666 | 55   | YEEISQIRHFQKQTYNSTIIEEASERIIV      | 1        | 110.769 | 252.05 | 110.77 | _HFQKQTN (de) YSTIIEEASER                                | HFQKQTN (110.77) YSTIIEEASER                                              | 8                               | 2 | 1177 | 1   | 1 | 1 | 1 |   |
| IPI00173181 | 184  | SPEVREIIVDEIISNSSTIASYKTEYVEDP     | 1        | 54.0044 | 181.34 | 54.004 | _EIIIVDEIISN (de) SSTIASYK                               | EIIIVDEIISN (54) SSTIASYK                                                 | 10                              | 3 | 662  | 1   | 1 | 1 | 1 |   |
| IPI01023214 | 290  | IINISRSKSDTQNIYVNSTGRAMVAGTSFYA    | 0.999999 | 62.6333 | 153.39 | 153.39 | _KSDTQNIYV (de) VSTGR                                    | KSDTQNIYV (1) VSTGR                                                       | 10                              | 3 | 566  | 1   | 1 | 1 | 1 |   |
| IPI00322497 | 250  | IKFRFIRNGIASGSGNCSGTGNGDGFHAW      | 1        | 166.653 | 166.65 | 166.65 | _N (de) GIASGSGN (de) CSTGPN (de) GDGSHAW                | N (1) GIASGSGN (1) CSTGPN (1) GDGSHAW (166.65) GIASGSGN (166.65) CST      | 9                               | 3 | 975  | 1   | 1 | 1 | 1 |   |
| IPI00322575 | 71   | FSSIPDVIDGRIDSFNDSFMIVYTPITPT      | 1        | 150.909 | 150.91 | 150.91 | _IDSFN (de) DSTFM (ox) IVYTPITPTTQR                      | IDSFN (1) DSTFMIVYTPITPTTQR                                               | 5                               | 1 | 1283 | 1   | 1 | 1 | 1 |   |
| IPI01026704 | 317  | IQRFSIATIGHYNRGNIISTEKFVEEIKIAS    | 1        | 68.8302 | 88.021 | 68.83  | _GN (de) ISTEKFVEEIK                                     | GN (68.83) ISTEKFVEEIK                                                    | 2                               | 2 | 748  | 1   | 1 | 1 | 1 |   |
| IPI01008227 | 330  | PPNEGFCPCRESGIQNVSTCRFGAPIFISHP    | 1        | 103.909 | 107.97 | 103.91 | _ESGIQN (de) VSTCR                                       | ESGIQN (1) VSTCR                                                          | 6                               | 2 | 626  | 1   | 1 | 1 | 1 |   |
| IPI00123428 | 85   | GVGRDNVSPKQEGPRNISTCFSSGDIFAAHN    | 1        | 84.3274 | 185.71 | 84.327 | _EGPRN (de) ISTCFSSGDIFAAHN (de) ISER                    | EGPRN (1) ISTCFSSGDIFAAHN (1) ISEFEGPRN (84.33) ISTCFSSGDIFAAHN (         | 5                               | 3 | 890  | 1   | 1 | 1 | 1 |   |
| IPI00654069 | 43   | AGDRVYIHPFHIIYHNKSTCAIENPSVETI     | 1        | 112.129 | 112.13 | 112.13 | _YIHPFHIIYHN (de) K                                      | YIHPFHIIYHN (1) K                                                         | 12                              | 3 | 561  | 1   | 1 | 1 | 1 |   |
| IPI00127100 | 102  | TSSGPPRVYSIPGRENYSVDANGIQSQMIS     | 1        | 111.377 | 149.85 | 111.38 | _VYSIPGREN (de) YSSVDAN (de) GIQSQM (ox) ISR             | VYSIPGREN (1) YSSVDAN (1) GIQSQM (1) VYSIPGREN (111.38) YSSVDAN (111      | 9                               | 3 | 930  | 1   | 1 | 1 | 1 |   |
| IPI00399798 | 395  | MEIDWAVTAGAKISENGSSVAGIISSPNMEK    | 1        | 93.6706 | 164.94 | 115.87 | _ISEN (de) GSSVAGIISSPNMEK (ox) EK                       | ISEN (1) GSSVAGIISSPNMEK                                                  | ISEN (93.67) GSSVAGIISSPN (-93. | 4 | 3    | 646 | 1 | 1 | 1 | 1 |
| IPI00131898 | 442  | PMPDSCQWPEKMRFINISSTGIRVYKTCIPQ    | 1        | 93.0578 | 93.058 | 93.058 | _FIN (de) ISSTGIR                                        | FIN (93.06) ISSTGIR                                                       | 3                               | 2 | 555  | 1   | 1 | 1 | 1 |   |
| IPI00111960 | 140  | PWCFPPSPYSYRIENISSTESGYTATITR      | 1        | 53.5041 | 271.64 | 53.504 | _IEN (de) ISSTESGYTATITR                                 | IEN (1) ISSTESGYTATITR                                                    | 3                               | 2 | 922  | 1   | 1 | 1 | 1 |   |
| IPI00338561 | 197  | IETDMQIMVRIINKFNSSSSIEEKVAIFD      | 1        | 87.5658 | 87.566 | 87.566 | _IIN (de) KFN (de) SSSSSIEEK                             | IIN (1) KFN (1) SSSSSIEEK                                                 | 6                               | 2 | 843  | 1   | 1 | 1 | 1 |   |
| IPI00856723 | 104  | FRDFRPIDKSRFQIINFSSSEIKVSNIVNSI    | 1        | 136.299 | 136.3  | 136.3  | _FQIIN (de) FSSSEIK                                      | FQIIN (1) FSSSEIK                                                         | 5                               | 2 | 707  | 1   | 1 | 1 | 1 |   |
| IPI00137792 | 333  | ESTPVNGFPFPPFKGNQSSQWLYEAMAKAW     | 1        | 148.027 | 148.03 | 148.03 | _GN (de) QSSQWLYEAMAK (ox) AK                            | GN (1) QSSQWLYEAMAK                                                       | 2                               | 2 | 815  | 1   | 1 | 1 | 1 |   |
| IPI00876541 | 819  | KSAINSEWEKIQQQSNQSSQFIHSVERFSQA    | 1        | 48.6226 | 111.34 | 48.623 | _IIQQSN (de) QSSQFIHSVER                                 | IIQQSN (1) QSSQFIHSVER                                                    | 7                               | 3 | 711  | 1   | 1 | 1 | 1 |   |
| IPI00677395 | 160  | QAFPSINKEITGRINISQEGSTDVAVARTQ     | 1        | 60.9487 | 226.57 | 60.949 | _EITGRIN (de) ISSQEGSTDVAVAR                             | EITGRIN (1) ISSQEGSTDVAVAR                                                | 7                               | 3 | 712  | 1   | 1 | 1 | 1 |   |
| IPI00625835 | 124  | IMGRYKYETTISPTSNISNSPFIENRNTQT     | 1        | 135.211 | 167.51 | 135.21 | _YKYETTISPTSN (de) ISSN (de) SFICIEN (de) R              | YKYETTISPTSN (1) ISSN (1) SFICIEN (1) YKYETTISPTSN (135.21) ISSN (135     | 12                              | 3 | 943  | 1   | 1 | 1 | 1 |   |
| IPI00405742 | 451  | VDINKKIQDIAISGNISSIYAMTDQKVFRI     | 1        | 282.718 | 282.72 | 282.72 | _QDIAISGN (de) ISSIYAMTDQK                               | QDIAISGN (1) ISSIYAMTDQK                                                  | 8                               | 2 | 1036 | 1   | 1 | 1 | 1 |   |
| IPI00330594 | 132  | SSCHKEVQIIVYQMDNVSIVQIIGSHIEDV     | 1        | 59.3587 | 176.9  | 59.359 | _YQMDN (de) VSSIVQIIGSHIEDVN (de) ADLIQTK                | YQMDN (1) VSSIVQIIGSHIEDVN (1) ADYVQMDN (59.36) VSSIVQIIGSHIEDVN          | 5                               | 3 | 1050 | 1   | 1 | 1 | 1 |   |
| IPI00115976 | 715  | APIEAYSGIVRHPGNFSSISCDYFAVNSQR     | 1        | 77.8708 | 126.07 | 77.871 | _HPGN (de) FSSISCDYFAVN (de) QSR                         | HPGN (1) FSSISCDYFAVN (1) QSR                                             | 4                               | 2 | 1094 | 1   | 1 | 1 | 1 |   |
| IPI00762812 | 814  | HPIDIQEDFNATINVASSIIPKEAGSKETP     | 1        | 82.5933 | 82.593 | 82.593 | _M (ox) SQHPIDIQEDFN (de) N (de) ATIVN (de) ASSIIPK      | MSQHPIDIQEDFN (1) N (1) ATIVN (1) ASMSQHPIDIQEDFN (82.59) N (82.59)       | 19                              | 3 | 968  | 1   | 1 | 1 | 1 |   |
| IPI00387282 | 281  | NQHVPMESHIIQFVNWSSIIIPERYKSPYF     | 1        | 55.994  | 153.24 | 55.994 | _AM (ox) IIN (de) QHVPM (ox) ESSHIIQFVN (de) WSSIIIPERYK | AM (1) QHVPMESHIIQFVN (1) WSSIIAM (55.99) QHVPMESHIIQFVN (                | 20                              | 4 | 933  | 1   | 1 | 1 | 1 |   |
| IPI00123342 | 830  | RRKWPERIASDNIINHSSIFIKGARIPEM      | 1        | 82.6513 | 227    | 82.651 | _ISAIDN (de) IIN (de) HSSIFIK                            | ISAIDN (1) IIN (1) HSSIFIK                                                | 9                               | 3 | 596  | 1   | 1 | 1 | 1 |   |
| IPI00119522 | 119  | ITGSPVSNISAHIFSNISSEIKITIDFDRIA    | 1        | 129.082 | 135.3  | 129.08 | _IQ (de) DIEITGSPVSN (de) ISAHIFSN (de) ISSIEK           | IQDIEITGSPVSN (1) ISAHIFSN (1) ISIQDIEITGSPVSN (129.08) ISAHIFSN          | 21                              | 3 | 968  | 1   | 1 | 1 | 1 |   |
| IPI00137987 | 123  | GSHTFQGMFGCEITNNSRSGAVWRYAYDGED    | 1        | 54.3685 | 162.77 | 54.368 | _DTTGSHTFQGM (ox) FGCEITN (de) N (de) R                  | DTTGSHTFQGMFGCEITN (1) N (1) R                                            | 19                              | 3 | 764  | 1   | 1 | 1 | 1 |   |
| IPI00108844 | 84   | SDTYSYIFRVCREANHSAGIVQINKSND       | 1        | 91.6567 | 182.15 | 91.657 | _EASN (de) HSSGAGIVQIN (de) K                            | EASN (1) HSSGAGIVQIN (1) K                                                | 4                               | 2 | 807  | 1   | 1 | 1 | 1 |   |
| IPI00315535 | 390  | RCVRRNPSANTFHIHINASSFRIVPGHTPSEP   | 1        | 67.5869 | 151.44 | 117.67 | _NPSANTFHIHIN (de) ASSFR                                 | NPSANTFHIHIN (1) ASSFR                                                    | 11                              | 2 | 889  | 1   | 1 | 1 | 1 |   |
| IPI00742377 | 287  | SDAQPHIQIKHVINGSGFADGFPYVQVI       | 1        | 90.3161 | 119.8  | 90.316 | _HVVIN (de) GSSFGADGFPYVQVIK                             | HVVIN (1) GSSFGADGFPYVQVIK                                                | 5                               | 2 | 1118 | 1   | 1 | 1 | 1 |   |
| IPI00122973 | 362  | GVEPRPPTQVQFTINASSEHHRSPFCSAA      | 1        | 53.4444 | 70.994 | 53.444 | _VVIISGVEPRPPTQVQFTIN (de) ASSEHHR                       | VVIISGVEPRPPTQVQFTIN (1) ASSEHHR                                          | 21                              | 5 | 641  | 1   | 1 | 1 | 1 |   |
| IPI00120769 | 48   | MTATKYFTNRIDVSNVSDTDQSCSTKAI       | 1        | 120.106 | 120.11 | 120.11 | _IDVSN (de) VSSDTDQSCSTK                                 | IDVSN (1) VSSDTDQSCSTK                                                    | 6                               | 2 | 1051 | 1   | 1 | 1 | 1 |   |
| IPI00330594 | 115  | TEMQVAVIRDRDYENSSCHKEVQIIVYQMDN    | 1        | 88.9922 | 94.122 | 88.992 | _IRDYEN (de) SSSCHKEVQIIVYQMDN                           | IRDYEN (1) SSSCHKEVQIIVYQMDN                                              | 7                               | 3 | 779  | 1   | 1 | 1 | 1 |   |
| IPI00129041 | 57   | IAGTPEHRCIRVPHTVNISSAWRNHSIPIETK   | 1        | 77.6441 | 129.77 | 77.644 | _CIVPHTVN (de) ISSAWR                                    | CIVPHTVN (1) ISSAWR                                                       | 8                               | 3 | 548  | 1   | 1 | 1 | 1 |   |
| IPI00123342 | 155  | PQIQFSPPEEIVGMVINYRSIAEDFAEQPIK    | 1        | 232.541 | 244.91 | 232.54 | _FQIQFSPPEEIVGMVIN (de) YSR                              | FQIQFSPPEEIVGMVIN (1) YSR                                                 | 20                              | 3 | 895  | 1   | 1 | 1 | 1 |   |
| IPI00463492 | 292  | ARVIEKDFDTHYHNSRRIQEFIRAQEPG       | 1        | 80.3353 | 142.39 | 142.39 | _VIENEKDFDTHYHN (de) ESR                                 | VIENEKDFDTHYHN (1) ESR                                                    | 14                              | 2 | 1074 | 1   | 1 | 1 | 1 |   |
| IPI00405742 | 530  | SREKSCVAITDAFPQMSRRAGQEVRSISVAP    | 1        | 61.1674 | 151.44 | 61.167 | _SCVAITDAFPQN (de) M (ox) SRR                            | SCVAITDAFPQN (1) MSRR                                                     | 12                              | 3 | 624  | 1   | 1 | 1 | 1 |   |
| IPI00115976 | 727  | HPGNFSSISCDYFAVNSQRIVCDIGNPMKA     | 1        | 77.8708 | 126.07 | 77.871 | _HPGN (de) FSSISCDYFAVN (de) QSR                         | HPGN (1) FSSISCDYFAVN (1) QSR                                             | 16                              | 2 | 1094 | 1   | 1 | 1 | 1 |   |
| IPI00113517 | 192  | VGCIPIYTIIPPEHHVNGSRPCTGEGDTPRC    | 1        | 44.9151 | 60.645 | 44.915 | _KGIVSGGVYN (de) SHVGCIPYTIIPPEHHVNGSRPCTGEGDTPR         | KGIVSGGVYN (1) SHVGCIPYTIIPPEHHVNGSRPCTGEGDTPR                            | 28                              | 5 | 913  | 1   | 1 | 1 | 1 |   |
| IPI00226790 | 331  | RKTYAVYDFIDTAMINNSRNINQIKWRP       | 1        | 170.113 | 188.41 | 170.11 | _KTYAVYDFIDTAMIN (ox) IN (de) N (de) SR                  | KTYAVYDFIDTAMIN (1) N (1) SR                                              | 15                              | 3 | 714  | 1   | 1 | 1 | 1 |   |
| IPI00121908 | 75   | KIVPCFVGVIPIAENFSLINKEESIQR        | 1        | 73.296  | 145.46 | 73.296 | _IVPCFVGVIPIAEN (de) FSR                                 | IVPCFVGVIPIAEN (1) FSR                                                    | 15                              | 3 | 705  | 1   | 1 | 1 | 1 |   |
| IPI0022429  | 610  | EFHQDNGPENGVYINISRGVNRFCISKPGV     | 1        | 134.465 | 134.47 | 134.47 | _CAISHAITIEFHQDGN (de) GPEN (de) VGIYN (de) ISR          | CAISHAITIEFHQDGN (1) GPEN (1) VGIYCAISHAITIEFHQDGN (134.47) GPEN          | 25                              | 3 | 1039 | 1   | 1 | 1 | 1 |   |
| IPI00121190 | 528  | EGCWGPEPRDCVSCQVNSRGRECVKCNIE      | 1        | 94.7673 | 99.752 | 94.767 | _DCVSCQN (de) VSR                                        | DCVSCQN (1) VSR                                                           | 7                               | 2 | 613  | 1   | 1 | 1 | 1 |   |
| IPI00119065 | 1500 | AEAEQQAQAAIDKANASRQGVQANQETRE      | 1        | 94.0232 | 94.023 | 94.023 | _AAQAAIDKAN (de) ASR                                     | AAQAAIDKAN (1) ASR                                                        | 9                               | 2 | 609  | 1   | 1 | 1 | 1 |   |
| IPI00115516 | 456  | PAPAPGRIEKEIIEGIANVSRREGGRMDIEE    | 1        | 96.8656 | 136.17 | 96.866 | _IEKEIIEGIAN (de) VSR                                    | IEKEIIEGIAN (1) VSR                                                       | 10                              | 3 | 482  | 1   | 1 | 1 | 1 |   |
| IPI00469123 | 58   | GSTAIKCGPSRASGNFQVDFIHKERQI        | 1        | 72.8979 | 178.14 | 72.898 | _ASGN (de) FSQVDFIHKER                                   | ASGN (1) FSQVDFIHKER                                                      | 4                               | 3 | 679  | 1   | 1 | 1 | 1 |   |
| IPI00122973 | 243  | QIFHSPDIAIRDYVNASQSIYSSPRVIGP      | 1        | 56.5333 | 202.18 | 56.533 | _GVTSVSIQIFHSPDIAIRDYVNASQSIYSSPR                        | GVTSVSIQIFHSPDIAIRDYVNASQSIYSSPR                                          | 22                              | 4 | 889  | 1   | 1 | 1 | 1 |   |
| IPI00114958 | 242  | ECRGNIFMDINNKIANFSDQCTIYSGDDIVE    | 1        | 42.8061 | 156.41 | 42.806 | _IAN (de) FSQCTIYSGDDIVEAIPKPCPGCPR                      | IAN (1) FSQCTIYSGDDIVEAIPKPCPGCPR                                         | 3                               | 3 | 1085 | 1   | 1 | 1 | 1 |   |
| IPI00123428 | 75   | IKSIDHIVGVRDNVSPKQEGPRNISTCF       | 1        | 59.8622 | 161.35 | 59.862 | _SIDHIVGVRDN (de) VSPKQ                                  | SIDHIVGVRDN (1) VSPKQ                                                     | 14                              | 3 | 691  | 1   | 1 | 1 | 1 |   |
| IPI00129526 | 62   | EVQREEEAIIQIDGINSQIREIREKSEKFA     | 1        | 185.873 | 204.47 | 185.87 | _TDDVEVQREEEAIIQIDGIN (de) ASQIR                         | TDDVEVQREEEAIIQIDGIN (1) ASQIR                                            | 19                              | 3 | 910  | 1   | 1 | 1 | 1 |   |
| IPI00471089 | 75   | VVSSVTTKAKGVAVTNTSQIGFRIDVADV      | 1        | 124.302 | 233.59 | 124.3  | _GVAVTN (de) TSQIGFR                                     | GVAVTN (1) TSQIGFR                                                        | 6                               | 2 | 676  | 1   | 1 | 1 | 1 |   |
| IPI00134585 | 754  | IIFGACKMDREAIIGNASQIFDWSIKGASIS    | 1        | 76.5863 | 198.95 | 76.586 | _M (ox) GDREAIIGN (de) ASQIFDWSIK                        | MGDREAIIGN (1) ASQIFDWSIK                                                 | 9                               | 3 | 719  | 1   | 1 | 1 | 1 |   |
| IPI00114044 | 93   | NISESVEDPGRGSPGNASQGSIIHSPQAI      | 1        | 42.3222 | 100.28 | 42.322 | _GSPGN (de) ASQGSIIHSPQAIQADPR                           | GSPGN (1) ASQGSIIHSPQAIQADPR                                              | 5                               | 4 | 636  | 1   | 1 | 1 | 1 |   |
| IPI00320675 | 514  | QKVVYIRWGEVDIIGNCSQFYPRDYKEMQ      | 1        | 62.2028 | 154.49 | 62.203 | _WGEVDIIGN (de) CSQFYPRDYKEMQ                            | WGEVDIIGN (1) CSQFYPRDYKEMQ                                               | 9                               | 3 | 881  | 1   | 1 | 1 | 1 |   |
| IPI00119522 | 520  | QISSRDGSDSAAVYNSQEWGTRSSCGTIR      | 1        | 296.733 | 296.73 | 296.73 | _DGSDSAAVYNSQEWGTR                                       | DGSDSAAVYNSQEWGTR                                                         | 11                              | 2 | 1045 | 1   | 1 | 1 | 1 |   |
| IPI00322304 | 123  | EIVTIGQCKVIATRYNSQDIISVNGYCTTS     | 1        | 120.33  | 120.33 | 120.33 | _YSN (de) ESQDYSVN (de) GYN (de) CTTSSVSSAIR             | YSN (1) ESQDYSVN (1) GYN (1) CTTSSVSSAIR                                  | 3                               | 3 | 915  | 1   | 1 | 1 | 1 |   |
| IPI00462465 | 180  | IEPKVFKPGSADAINDSQDFPFPETPAKVV     | 1        | 68.2915 | 192.27 | 68.291 | _VFKPGSADAIN (de) DSQDFPFPETPAK                          | VFKPGSADAIN (1) DSQDFPFPETPAK                                             | 12                              | 4 | 678  | 1   | 1 | 1 | 1 |   |
| IPI00987265 | 1627 | DGPFTVFPVHADIIISNMSQDEIARIRAHRI    | 1        | 158.516 | 158.52 | 158.52 | _DGPFTVFPVHADIIISN (de) M (ox) SQDEIAR                   | DGPFTVFPVHADIIISN (1) MSQDEIAR                                            | 17                              | 3 | 912  | 1   | 1 | 1 | 1 |   |
| IPI00131143 | 268  | QGTGIGFIYASGIGVNSQAKAIYVYTFGAI     | 1        | 150.984 | 196.78 | 150.98 | _QGTGIGFIYASGIGVNSQAKAI                                  | QGTGIGFIYASGIGVNSQAKAI                                                    | 16                              | 3 | 686  | 1   | 1 | 1 | 1 |   |
| IPI00130661 | 221  | QRNYITAKDVGSGTTNNSQACAFIEQYFHN     | 1        | 69.4348 | 205.13 | 69.435 | _DVSGGTTN (de) N (de) SQACAFIEQYFHN (de) SDITEFM (ox) R  | DVSGGTTN (1) N (1) SQACAFIEQYFHN (1) DVSGGTTN (69.43) N (69.43) SQACA     | 8                               | 3 | 1196 | 1   | 1 | 1 | 1 |   |
| IPI00108844 | 114  | KDETIVGRINETHIFNGSNWIMIIYKGDDEY    | 0.999963 | 44.2704 | 162.46 | 162.46 | _IN (de) ETHIFN (de) GSNWIM (ox) IYK                     | IN (1) ETHIFN (1) GSNWIM (1) IYK                                          | 8                               | 3 | 738  | 1   | 1 | 1 | 1 |   |
| IPI00119063 | 3090 | TDVTTQCSMRMHINGSNVQIHRGTISNP       | 1        | 69.8636 | 192.14 | 69.864 | _M (ox) HIN (de) GSN (de) VQVJHR                         | MHIN (1) GSN (1) VQVJHR                                                   | 4                               | 3 | 508  | 1   | 1 | 1 | 1 |   |
| IPI00605187 | 757  | PSARWEKEIHHIQEQVNSVNFIDKKEEFIGS    | 1        | 62.9993 | 186.82 | 62.999 | _EIIHHIQEQN (de) VSN (de) VFIKKEEFIGSK                   | EIIHHIQEQN (1) VSN (1) VFIKKEEFIGSK                                       | 9                               | 3 | 997  | 1   | 1 | 1 | 1 |   |
| IPI00114319 | 121  | RTEAYFSIEGFPAEQNASNRAIHHVFEFSDIS   | 1        | 95.2051 | 201.37 | 95.205 | _IEAYFSIEGFPAEQN (de) ASN (de) R                         | IEAYFSIEGFPAEQN (1) ASN (1) R                                             | 15                              | 2 | 1073 | 1   | 1 | 1 | 1 |   |
| IPI00421157 | 318  | SFTVQRGRKFIQKHINASNPSEPATIIFTAA    | 0.999996 | 53.9793 | 240.13 | 53.979 | _HIN (de) ASNPSEPATIIFTAAR                               | HIN (1) ASNPSEPATIIFTAAR                                                  | 3                               | 2 | 1006 | 1   | 1 | 1 | 1 |   |
| IPI00114364 | 37   | DPGSKVADRYAVYVNSNPRFRQGDYHIDV      | 0.999947 | 42.7281 | 122.42 | 42.728 | _YAVYVN (de) SSNPR                                       | YAVYVN (1) SSNPR                                                          | 6                               | 2 | 679  | 1   | 1 |   |   |   |

|             |                                      |          |         |         |         |                                                  |                                 |                                                                          |    |   |      |   |   |   |   |
|-------------|--------------------------------------|----------|---------|---------|---------|--------------------------------------------------|---------------------------------|--------------------------------------------------------------------------|----|---|------|---|---|---|---|
| IPI00187353 | 145 CEQANKIGAINSTISNESKEAFIDWARYDD   | 1        | 58.9802 | 140.63  | 58.98   | _IGAIN (de) STISN (de) ESKEAFIDWAR               | IGAIN (1) STISN (1) ESKEAFIDWAR | IGAIN (58.98) STISN (58.98) ESKE                                         | 10 | 3 | 775  | 1 | 1 | 1 | 1 |
| IPI00322463 | 162 VPKFAIKDYRPSAGNNSIYQDVTVFKCIPH   | 1        | 71.3759 | 199.15  | 71.376  | _DYRPSAGN (de) N (de) SIYQDVTVFK                 | DYRPSAGN (1) N (1) SIYQDVTVFK   | DYRPSAGN (71.38) N (71.38) SIYQD                                         | 8  | 2 | 1089 | 1 | 1 | 1 | 1 |
| IPI00848693 | 1320 FTRGVENDVFIYRPNNGSIVWGKVVDPVPI  | 1        | 58.2738 | 175.59  | 58.274  | _YPN (de) N (de) GSIWNGK                         | YPN (1) N (1) GSIWNGK           | YPN (58.27) N (58.27) GSIWNGK                                            | 4  | 2 | 619  | 1 | 1 | 1 | 1 |
| IPI00652675 | 300 YGNVTCVANKIGVTNASIVIFRPGSVRGIN   | 1        | 207.921 | 207.92  | 207.92  | _IGVTN (de) ASIVIFRPGSVR                         | IGVTN (1) ASIVIFRPGSVR          | IGVTN (207.92) ASIVIFRPGSVR                                              | 5  | 2 | 894  | 1 | 1 | 1 | 1 |
| IPI00134585 | 189 GDSVYRITMEFKGWINGSIVGFYKTYMEDG   | 1        | 138.936 | 194.24  | 138.94  | _GWIN (de) GSIWGFYK                              | GWIN (1) GSIWGFYK               | GWIN (138.94) GSIWGFYK                                                   | 4  | 2 | 671  | 1 | 1 | 1 | 1 |
| IPI00331318 | 233 KNIMAIKKFMVKFFNDSIVDPVDESEWGFYR  | 1        | 178.717 | 178.72  | 178.72  | _FFN (de) DSIVDPVDESEWGFYR                       | FFN (1) DSIVDPVDESEWGFYR        | FFN (178.72) DSIVDPVDESEWGFYR                                            | 3  | 2 | 1171 | 1 | 1 | 1 | 1 |
| IPI00894972 | 696 RSRGIFPDGSHEISGNSTIPDKSIDFHFH    | 1        | 109.872 | 109.87  | 109.87  | _GIFPDGSHEISGN (de) TSITPDK                      | GIFPDGSHEISGN (1) TSITPDK       | GIFPDGSHEISGN (109.87) TSITPDK                                           | 13 | 3 | 692  | 1 | 1 | 1 | 1 |
| IPI00123428 | 52 SATSFIEDIMDRYKNDSTITITQIKSIDHI    | 1        | 109.145 | 201.48  | 109.15  | _YGNK (de) DSITITQIK                             | YGNK (1) DSITITQIK              | YGNK (109.15) DSITITQIK                                                  | 4  | 1 | 495  | 1 | 1 | 1 | 1 |
| IPI01026704 | 1113 FSSNITIRGEIQSENSSITISSNRRKREIA  | 1        | 118.27  | 235.75  | 124.25  | _GEIQSEN (de) SSITISSNRR                         | GEIQSEN (1) SSITISSNRR          | GEIQSEN (118.27) SSITISSNRR (-11                                         | 7  | 3 | 604  | 1 | 1 | 1 | 1 |
| IPI00321634 | 185 ETTERVFPYISVMVNGSISYDHSKDGWRSE   | 1        | 89.8461 | 232.15  | 89.846  | _VFPYISVM (ox) VN (de) N (de) GSIYDHSKDGWR       | 89.846                          | VFPYISVM (89.85) N (89.85) GSI                                           | 11 | 4 | 652  | 1 | 1 | 1 | 1 |
| IPI00830356 | 191 PGVQRVFPYISAMVNGSISYDHERDGRPTE   | 1        | 56.8514 | 136.2   | 56.851  | _VFPYISAM (ox) VN (de) N (de) GSIYDHER           | 56.851                          | VFPYISAM (56.85) N (56.85) GSI                                           | 11 | 4 | 580  | 1 | 1 | 1 | 1 |
| IPI00123194 | 271 IYRIGIGHNQIRMIENGSIIFPTIREIHD    | 1        | 96.2471 | 163.51  | 96.247  | _M (ox) IEN (de) GSIISFIPTIR                     | 96.247                          | MIEN (96.25) GSIISFIPTIR                                                 | 4  | 2 | 798  | 1 | 1 | 1 | 1 |
| IPI00856723 | 116 QIINFSSSEIKVSTNVSISDEGRYFCQIYT   | 1        | 128.951 | 133.47  | 128.95  | _VSITN (de) VSISDEGR                             | VSITN (1) VSISDEGR              | VSITN (128.95) VSISDEGR                                                  | 5  | 2 | 689  | 1 | 1 | 1 | 1 |
| IPI00309230 | 416 DECPGVGIVIPQSPGNESIRHHIEVMEIYR   | 1        | 109.059 | 149.41  | 109.06  | _YGVIVDECPGVGIVIPQSPGN (de) ESIR                 | YGVIVDECPGVGIVIPQSPGN (1) ESIR  | YGVIVDECPGVGIVIPQSPGN (109.0                                             | 22 | 2 | 1410 | 1 | 1 | 1 | 1 |
| IPI00130117 | 855 EMPQVQDMVVSQKNCISQRNPCCIPIQ      | 1        | 76.0486 | 76.049  | 76.049  | _ISPPGAE (ox) FQVQDM (ox) VVSQKGN (de) CSIQR     | 76.049                          | ISPPGAE (76.05) FQVQDM (76.05) VVSQKGN (76.05                            | 22 | 4 | 758  | 1 | 1 | 1 | 1 |
| IPI00112614 | 161 DFIVDNETFSGFIQHNSIIPRSTVDSIQAN   | 1        | 148.889 | 149.85  | 148.89  | _IQDFIVDN (de) ETFSGFIQHN (de) ISIPR             | 148.89                          | IQDFIVDN (1) ETFSGFIQHN (1) ISIPR                                        | 18 | 3 | 898  | 1 | 1 | 1 | 1 |
| IPI00115482 | 11 _____MEAHNVSAFPNFSIPPFGHRRATDA    | 1        | 73.9176 | 192.16  | 73.918  | _M (ox) EAHN (de) VSAPFN (de) FSIPPPGHR          | 73.918                          | MEAHN (73.92) VSAPFN (73.92) FSI                                         | 11 | 3 | 777  | 1 | 1 | 1 | 1 |
| IPI01026704 | 100 GRERSMPCVKIDIPVNTSIPNVEIKEMFT    | 1        | 111.643 | 168.41  | 111.64  | _IDIPVN (de) TSIPN (de) VTEIK                    | 111.64                          | IDIPVN (111.64) TSIPN (111.64) V                                         | 6  | 3 | 586  | 1 | 1 | 1 | 1 |
| IPI00135560 | 245 IDMEFRGAFFPIKEDNWSIPNRAVEPQIEDD  | 0.999999 | 60.1786 | 128.22  | 128.22  | _GAFPPKEDN (de) WSIPNR                           | 128.22                          | GAFPPKEDN (60.18) WSIPN (-60.1                                           | 10 | 2 | 946  | 1 | 1 | 1 | 1 |
| IPI00129485 | 176 FFHNEKSVRYHHYSSNFSIPKANSHSGDY    | 1        | 158.3   | 187.85  | 158.3   | _YHYSSN (de) FSIIPK                              | 158.3                           | YHYSSN (158.3) FSIIPK                                                    | 7  | 3 | 494  | 1 | 1 | 1 | 1 |
| IPI00138180 | 59 KRDWIWNQMHIDEKNESIPHYVGGIKSNVN    | 1        | 143.714 | 143.71  | 143.71  | _DWIWN (de) QM (ox) HIDEKN (de) ESIPHYVGK        | 143.71                          | DWIWN (143.71) QMHIDEKN (143.7                                           | 14 | 3 | 963  | 1 | 1 | 1 | 1 |
| IPI00108811 | 165 RVYTYADTPNDPQISNFSIPEEDTKIKPII   | 1        | 50.2553 | 180.63  | 50.255  | _VYTYADTPN (de) DFQISN (de) FSIPEEDTKIK          | 50.255                          | VYTYADTPN (50.26) DFQISN (50.26                                          | 15 | 4 | 760  | 1 | 1 | 1 | 1 |
| IPI00480532 | 48 FVGEGRVLIETIPANYSINSSKIKITVIPS    | 1        | 103.387 | 160.48  | 103.39  | _VIETIPAN (de) YSIN (de) SSK                     | 103.39                          | VIETIPAN (103.39) YSIN (103.39)                                          | 8  | 2 | 819  | 1 | 1 | 1 | 1 |
| IPI00858152 | 129 YGNVTCVANSKIHTNASIMIFEVKTAAIP    | 1        | 129.537 | 129.54  | 129.54  | _IGHN (de) ASIM (ox) IFEVK                       | 129.54                          | IGHN (129.54) ASIMIFEVK                                                  | 5  | 3 | 526  | 1 | 1 | 1 | 1 |
| IPI00312711 | 577 SASGAEIEAIEAQVINISIKYFNVTPIIHMV  | 1        | 167.239 | 231.83  | 167.24  | _ISASGAEIEAIEAQVIN (de) ISIK                     | 167.24                          | ISASGAEIEAIEAQVIN (167.24) ISI                                           | 17 | 2 | 1079 | 1 | 1 | 1 | 1 |
| IPI00123040 | 461 PKAPQHVHNIIPYTNVSIKMIITNPEGRKE   | 1        | 65.467  | 78.326  | 65.467  | _APQHVVN (de) HIPPYTN (de) VSIK                  | 65.467                          | APQHVVN (65.47) HIPPYTN (65.47)                                          | 14 | 3 | 673  | 1 | 1 | 1 | 1 |
| IPI00469218 | 312 NMTIPDAIVPTFISINSHKAIQATVGNYSK   | 1        | 92.4736 | 100.39  | 92.474  | _IN (de) M (ox) TIPDAIVPTFISIN (de) HSIK         | 92.474                          | IN (92.47) MTIPDAIVPTFISIN (92.                                          | 17 | 3 | 773  | 1 | 1 | 1 | 1 |
| IPI00221706 | 234 KNYSEVCRNCKEAYKNISIIYSQMQKINGIE  | 1        | 68.9439 | 162.48  | 68.944  | _EAYKN (de) ISIIYSQMQK (ox) QK                   | 68.944                          | EAYKN (68.94) ISIIYSQMQK                                                 | 5  | 2 | 917  | 1 | 1 | 1 | 1 |
| IPI00317488 | 157 ERAACRIEYKGFEGFNYSIIVQHASSGANIK  | 1        | 60.7641 | 218.25  | 60.764  | _FGFEGN (de) YSIIVQHASSGAN (de) K                | 60.764                          | FGFEGN (60.76) YSIIVQHASSGAN (6                                          | 6  | 3 | 710  | 1 | 1 | 1 | 1 |
| IPI00323134 | 692 EPTIITDSGNPPKNSIIRVVKVQCDSNG     | 1        | 114.498 | 167.59  | 114.5   | _SN (de) ISIIR                                   | 114.5                           | SN (114.5) ISIIR                                                         | 2  | 2 | 402  | 1 | 1 | 1 | 1 |
| IPI00108535 | 375 NSQSIQITERMTISQNSIIRIDPKREDAG    | 1        | 156.362 | 160.52  | 156.36  | _M (ox) TISQN (de) N (de) SIIR                   | 156.36                          | MTISQN (156.36) N (156.36) SIIR                                          | 6  | 2 | 648  | 1 | 1 | 1 | 1 |
| IPI00123442 | 47 FIEFKWISYDQCHHNSIIPPTIEVCNRT      | 1        | 99.4091 | 99.409  | 99.409  | _IYSDQCHHN (de) ISIIIPPTIEVCN (de) R             | 99.409                          | IYSDQCHHN (99.41) ISIIIPPTIEVC                                           | 9  | 3 | 922  | 1 | 1 | 1 | 1 |
| IPI00115516 | 795 IIGGQAGIGRRIGAINNSIIEEDRIQOISI   | 1        | 93.4784 | 125.03  | 93.478  | _RIGAIN (de) N (de) SIIIEEDR                     | 93.478                          | RIGAIN (93.48) N (93.48) SIIIEED                                         | 6  | 3 | 567  | 1 | 1 | 1 | 1 |
| IPI00406603 | 1049 IRGHNSPPFDRRIINHSIIHKSNETAISP   | 1        | 91.9373 | 158.05  | 91.937  | _IIN (de) HSIIHK                                 | 91.937                          | IIN (91.94) HSIIHK                                                       | 3  | 2 | 595  | 1 | 1 | 1 | 1 |
| IPI00108535 | 104 NFTGQAYSGREIYSNGSIIFQMIMKDMGV    | 1        | 78.1909 | 269.49  | 78.191  | _EIIYSN (de) GSIIFQMIMK                          | 78.191                          | EIIYSN (78.19) GSIIFQMIMK                                                | 6  | 3 | 675  | 1 | 1 | 1 | 1 |
| IPI00130486 | 397 CSVISKGGYIKVHYNASIIDGTIIDSTWNI   | 1        | 101.423 | 135.09  | 101.423 | _YHYN (de) ASIIDGTIIDSTWNI                       | 101.423                         | YHYN (101.42) ASIIDGTIIDSTWNI (-                                         | 4  | 3 | 795  | 1 | 1 | 1 | 1 |
| IPI00330481 | 171 QVQVMKAVGVSYTTNVSIIAPRSEHIVNFT   | 1        | 157.233 | 179.14  | 157.23  | _AVVGSYTTN (de) VSIIAPR                          | 157.23                          | AVVGSYTTN (157.23) VSIIAPR                                               | 10 | 3 | 584  | 1 | 1 | 1 | 1 |
| IPI00808345 | 114 MEEMIRNKSSECKAINDSIHYINREQRNCR   | 1        | 107.37  | 162.68  | 107.37  | _AIN (de) DSIHYINR                               | 107.37                          | AIN (107.37) DSIHYINR (-107.37) R                                        | 3  | 2 | 659  | 1 | 1 | 1 | 1 |
| IPI00116945 | 124 PDSIEDDIIFKISQNASIGPHVRPIPIQYE   | 1        | 65.2717 | 95.409  | 65.272  | _ISQN (de) ASIGPHVRPIPIQYEDKEVEPGTICD            | 65.272                          | ISQN (65.27) ASIGPHVRPIPIQYEDK                                           | 4  | 4 | 1139 | 1 | 1 | 1 | 1 |
| IPI00314673 | 131 ECRRCVVNGHRIRNNSIGGVINIKYDVIIR   | 1        | 122.955 | 165.58  | 122.955 | _IRN (de) SSIIGGVINK                             | 122.955                         | IRN (122.95) SSIIGGVINK (-122.95)                                        | 3  | 2 | 630  | 1 | 1 | 1 | 1 |
| IPI00405543 | 141 SKHFAKIEIVPIIYDNDISFVQDKSVYTPQ   | 1        | 63.337  | 173.28  | 63.337  | _IEIVPIIYDN (de) DSIFVQDK                        | 63.337                          | IEIVPIIYDN (63.34) DSIFVQDK                                              | 10 | 3 | 742  | 1 | 1 | 1 | 1 |
| IPI00459432 | 228 VCQIEVAIVGASPRGNHSIFGEVATIGQGP   | 1        | 117.404 | 236.38  | 117.404 | _GN (de) HSIFGEVATIGQGPCDPCSVNER                 | 117.404                         | GN (117.4) HSIFGEVATIGQGPCDPC                                            | 2  | 3 | 886  | 1 | 1 | 1 | 1 |
| IPI00130754 | 139 IEFKHYDYITSTNSGIEGIEINREGGVCR    | 1        | 67.1895 | 129.46  | 67.1895 | _KYHYDYITSTN (de) GIEGIEINR                      | 67.1895                         | KYHYDYITSTN (67.19) GIEGIEINR                                            | 12 | 3 | 817  | 1 | 1 | 1 | 1 |
| IPI00621027 | 969 HAEISFVITDGVGTGNDIEEVSIMRQNV     | 1        | 50.202  | 175.773 | 50.202  | _HAEISFVITDGVGTGN (de) DSIEEVSIMRQNV             | 50.202                          | HAEISFVITDGVGTGN (50.2) DSIEE                                            | 16 | 4 | 749  | 1 | 1 | 1 | 1 |
| IPI00856861 | 382 DDQKQAFRAVYEAIRNCSIEDDSVRSIIKPI  | 1        | 123.079 | 123.08  | 123.08  | _AVYEAIRN (de) CSIEDDSVR                         | 123.08                          | AVYEAIRN (123.08) CSIEDDSVR                                              | 8  | 2 | 999  | 1 | 1 | 1 | 1 |
| IPI00221669 | 598 NSIWNIEEHNPKIPNISIDVIQSPFPEII    | 1        | 37.2277 | 65.425  | 37.228  | _IPN (de) ISIDVIQSPFPEIIIESHM (ox) VM (ox) IR    | 37.228                          | IPN (37.23) ISIDVIQSPFPEIIIESH                                           | 3  | 4 | 757  | 1 | 1 | 1 | 1 |
| IPI00115976 | 612 ESEFRDKISPIHAIINFSIDPKAPMDSHGIR  | 1        | 62.1618 | 124.51  | 62.162  | _ISPIHAIIN (de) FSIIDPK                          | 62.162                          | ISPIHAIIN (62.16) FSIIDPK                                                | 9  | 3 | 556  | 1 | 1 | 1 | 1 |
| IPI00127407 | 198 FYTKIFINPEKREQINISIDHRCRIFQINDG  | 1        | 68.5357 | 95.094  | 68.536  | _EQIN (de) ISIDHR                                | 68.536                          | EQIN (68.54) ISIDHR                                                      | 4  | 2 | 613  | 1 | 1 | 1 | 1 |
| IPI00411145 | 1467 IEASRIDGSCRKVINNSIDEPRAIIVFPPK  | 1        | 79.492  | 93.345  | 79.492  | _KVIN (de) N (de) SDEPR                          | 79.492                          | KVIN (79.49) N (79.49) SDEPR                                             | 5  | 2 | 700  | 1 | 1 | 1 | 1 |
| IPI00315535 | 103 RFDAAAGTSVHGVPQNGSICAHIPMIKESVE  | 1        | 67.8637 | 131.33  | 67.864  | _FDAAGTSVHGVPQNG (de) GSICAHIPM (ox) IK          | 67.864                          | FDAAGTSVHGVPQNG (67.86) GSICAH                                           | 15 | 3 | 894  | 1 | 1 | 1 | 1 |
| IPI00115599 | 162 VYVMSTAIPMIKQSNNGSIAVSSIAAGMTQ   | 1        | 55.8644 | 176.21  | 55.864  | _QSN (de) GSIAVSSIAAGK                           | 55.864                          | QSN (55.86) GSIAVSSIAAGK                                                 | 3  | 2 | 717  | 1 | 1 | 1 | 1 |
| IPI00121627 | 295 YFNDYWNKQDYYPINESIASIRVVSFCPI    | 1        | 95.5698 | 211.57  | 95.57   | _DYYPIN (de) ESIAVIPR                            | 95.57                           | DYYPIN (95.57) ESIAVIPR                                                  | 6  | 2 | 876  | 1 | 1 | 1 | 1 |
| IPI00123196 | 257 ISKIGISFNSITVMENGSIANVPHIREIHD   | 1        | 54.15   | 172.57  | 54.15   | _IGISFN (de) SITVM (ox) EN (de) GSIAN (de) VPHIR | 54.15                           | IGISFN (1) SITVMEN (1) GSIAN (1) VPH                                     | 13 | 3 | 830  | 1 | 1 | 1 | 1 |
| IPI00116913 | 2211 GINASSAAWARIHRINASTADIQSKIRSPPG | 1        | 85.5541 | 128.95  | 85.554  | _IN (de) ASIADIQSK                               | 85.554                          | IN (85.55) ASIADIQSK                                                     | 2  | 2 | 581  | 1 | 1 | 1 | 1 |
| IPI00850413 | 558 SSTDISIKIHVAQPENDSHVAIKMYSDDC    | 1        | 49.3332 | 210.14  | 49.333  | _IHVAQPEN (de) DSHVAIIK                          | 49.333                          | IHVAQPEN (49.33) DSHVAIIK                                                | 8  | 4 | 444  | 1 | 1 | 1 | 1 |
| IPI00467180 | 88 SGMLNVKWRDRIAPASNSVHTVIRPIKAGYF   | 1        | 133.862 | 239.58  | 133.86  | _IAPASN (de) VSHTVIRPIK                          | 133.86                          | IAPASN (133.86) VSHTVIRPIK                                               | 6  | 2 | 902  | 1 | 1 | 1 | 1 |
| IPI00133365 | 212 RGHAAIAIVNHDNSYNSHRIDHISFGEIYP   | 1        | 76.3411 | 140.22  | 76.341  | _GHAHAAIAIVN (de) HDSYN (de) FSHR                | 76.341                          | GHAHAAIAIVN (76.34) HDSYN (76.34                                         | 15 | 3 | 717  | 1 | 1 | 1 | 1 |
| IPI00318595 | 403 YFFGKCFNAMEVDAINSSHPVSTPVENPAQIR | 1        | 67.4923 | 218.44  | 67.492  | _CFNAMEVDAIN (de) SSSHPVSTPVENPAQIR              | 67.492                          | CFNAMEVDAIN (1) SSSHPVSTPVENPAQIR                                        | 11 | 3 | 1001 | 1 | 1 | 1 | 1 |
| IPI00331032 | 113 QSTIDCVDPISIIAANRSHIPISPECHGWY   | 1        | 131.329 | 142.23  | 131.33  | _YEVDMN (de) QSTIDCVDPISIIAAN (de) R             | 131.33                          | YEVDMN (131.33) QSTIDCVDPISIIA                                           | 22 | 2 | 1328 | 1 | 1 | 1 | 1 |
| IPI00108811 | 289 HQRDIFSRDIPGAIANSNDHVKIIMIDDQRI  | 1        | 79.6139 | 198.16  | 79.614  | _DIGPAIAN (de) SSSHDVK                           | 79.614                          | DIGPAIAN (79.61) SSSHDVK                                                 | 6  | 2 | 713  | 1 | 1 | 1 | 1 |
| IPI00223446 | 574 DGAKNEIQKISNINSIHDIVQEATHAYN     | 0.734619 | 4.42192 | 125     | 125     | _ISN (de) ISN (de) ISHDIVQEATHAYN                | 125                             | ISN (0.265) ISN (0.735) ISHDIVQEATHAYN (-4.42) ISN (4.42) ISHDIVQEATHAYN | 8  | 3 | 1171 | 1 | 1 | 1 | 1 |
| IPI00128260 | 143 SMNPDGVEVAAAQPNMSGYIVGRNANGVD    | 1        | 80.9745 | 238.7   | 80.9745 | _IHIIPSM (ox) NPDGVEVAAAQPN (de) M (ox) SGYIVGR  | 80.9745                         | IHIIPSM (80.97) NPDGVEVAAAQPN (80.97) M (80.97) SGYIVGR                  | 21 | 3 | 1031 | 1 | 1 | 1 | 1 |
| IPI00408495 | 160 SVQEVNSKTQITCSINSSGDVIGHRWRRGG   | 1        | 91.4746 | 234.38  | 91.475  | _TQ (de) ITCSIN (de) SSGVDIVGHR                  | 91.475                          | TQITCSIN (91.47) SSGVDIVGHR                                              | 8  | 2 | 973  | 1 | 1 | 1 | 1 |
| IPI00331550 | 325 QRIMGIRALAGIVYNSGTEPCYDIYR       | 1        | 93.4953 | 264.23  | 93.495  | _AIAGIVYN (de) SSGTEPCYDIYR                      | 93.495                          | AIAGIVYN (93.5) SSGTEPCYDIYR                                             | 8  | 3 | 751  | 1 | 1 | 1 | 1 |
| IPI00222429 | 210 NSNANAAGPIVAGYNSVSGRSDGEPKMGV    | 1        | 83.8668 | 145.61  | 83.867  | _VYNSNAN (de) AAGPIVAGYNS (de) VSGSVR            | 83.867                          | VYNSNAN (83.87) AAGPIVAGYNS (83.87) VSGSVR                               | 12 | 2 | 1167 | 1 | 1 | 1 | 1 |
| IPI00757771 | 283 WIRKKEGVFEEISNSSGRFFITNKENYTE    | 1        | 97.9042 | 123.76  | 97.904  | _KKEN (de) GVFEIISN (de) SSGR                    | 97.904                          | KKEN (97.9) GVFEIISN (97.9) SSGR                                         | 18 | 2 | 892  | 1 | 1 | 1 | 1 |
| IPI00121550 | 158 RGERKRCRFDIWTGNCSGINDSYGYREGK    | 1        | 151.626 | 221.79  | 151.63  | _IDWIGN (de) CSGIN (de) DDSYGYR                  | 151.63</                        |                                                                          |    |   |      |   |   |   |   |

|             |      |                                   |          |         |        |         |                                                           |                                                                          |    |   |      |   |   |   |   |
|-------------|------|-----------------------------------|----------|---------|--------|---------|-----------------------------------------------------------|--------------------------------------------------------------------------|----|---|------|---|---|---|---|
| IPI00416285 | 449  | G1ETPKKIRVYGGIVNQSEINEGTAFFRVQE   | 1        | 76.7324 | 211.09 | 159.4   | _YVGGIVN (de) QSEINEGTAFFR                                | YVGGIVN (76.73) QSEIN (-76.73) E                                         | 7  | 3 | 701  | 1 | 1 | 1 | 1 |
| IPI00132474 | 520  | DEVNSEMDAYCRKNSESEICSNNGECVCGQ    | 0.999965 | 44.4959 | 238.68 | 238.68  | _KEN (de) SSEICSN (de) GECVCGCVCR                         | KEN (1) SSEICSN (0.019) N (0.981) GKEN (44.5) SSEICSN (-17.17) N (17     | 1  | 3 | 884  | 1 | 1 | 1 | 1 |
| IPI00855103 | 391  | KIASHPAEQFTSKIGNFSEIATHNQTFIKKI   | 1        | 69.9345 | 199.37 | 69.935  | _IGN (de) FSEIATHN (de) QTFIKKI                           | IGN (69.93) FSEIATHN (69.93) QTF                                         | 3  | 2 | 976  | 1 | 1 | 1 | 1 |
| IPI00115626 | 171  | RRPHFISVCDPDSQINCSSEGYIQNYRCRGED  | 1        | 91.7527 | 161.02 | 161.02  | _IRPHFISVCDPDSQIN (de) CSEGYIQNYR                         | IRPHFISVCDPDSQIN (1) CSEGYIQNYR                                          | 17 | 3 | 1106 | 1 | 1 | 1 | 1 |
| IPI00127352 | 233  | PIITGTIKKEDSCQINYSSEGPCIGMQRERY   | 1        | 118.719 | 195.96 | 118.72  | _KEDSCQIN (de) YSEGPCIGM (ox) QER                         | KEDSCQIN (1) YSEGPCIGMQR                                                 | 8  | 3 | 807  | 1 | 1 | 1 | 1 |
| IPI00458003 | 594  | IQNTPGIEEQANQRINIISEGEVAATYKANYP  | 1        | 137.456 | 137.46 | 137.46  | _IN (de) ISEGEVAATVK                                      | IN (1) ISEGEVAATVK                                                       | 2  | 2 | 666  | 1 | 1 | 1 | 1 |
| IPI00114236 | 71   | MDQNSDQWQDGVYINSSEGAVGRSIPQIYR    | 0.999998 | 56.7574 | 143.31 | 143.31  | _YM (ox) DQNSDQWQDGVYIN (de) SSEGAVGR                     | YMDQN (-56.76) SDGWQDGVYIN (56                                           | 17 | 3 | 908  | 1 | 1 | 1 | 1 |
| IPI00459432 | 133  | SSAIVFTRIIEFDSTNASEGAPPGKPYPPY    | 1        | 55.2471 | 162.83 | 55.247  | _IIEFDSTN (de) ASEGAQPPKPYPPYIAK                          | IIEFDSTN (1) ASEGAQPPKPYPPYIAK                                           | 8  | 4 | 720  | 1 | 1 | 1 | 1 |
| IPI00987265 | 607  | SKGRVITMANQVITVNIIEEGRIGIEPEGIP   | 1        | 94.5693 | 159.69 | 94.569  | _VITM (ox) AN (de) QVITVN (de) ISEEGR                     | VITMAN (1) QVITVN (1) ISEEGR                                             | 12 | 3 | 665  | 1 | 1 | 1 | 1 |
| IPI00135560 | 64   | ITIPDVYGAAGHFYVNIISDVRVTOIHIISSE  | 1        | 109.599 | 109.6  | 109.6   | _GHFYVN (de) ISDVR                                        | GHFYVN (1) ISDVR                                                         | 6  | 2 | 686  | 1 | 1 | 1 | 1 |
| IPI00310049 | 72   | TAEIFIEKKKEVHFVNASDVSVAHAHNSR     | 1        | 77.2224 | 138.91 | 77.222  | _EVHFFVN (de) ASDVDSVK                                    | EVHFFVN (77.22) ASDVDSVK                                                 | 7  | 2 | 847  | 1 | 1 | 1 | 1 |
| IPI00469218 | 116  | KNTTRYSVQHMVFTYNIISDTEHFFNAISKEI  | 1        | 74.9528 | 170.14 | 74.953  | _YSVQHM (ox) YFTYN (de) ISDTEHFFN (de) AISK               | YSVQHMVFTYN (1) ISDTEHFFN (1) AIS                                        | 11 | 3 | 971  | 1 | 1 | 1 | 1 |
| IPI00222967 | 115  | KEASHYSIHDIVISYNTSDTVFPGAVAKVG    | 1        | 39.2149 | 222.48 | 39.215  | _EASHYSIHDIVISYN (de) TSDTVFPGAVAK                        | EASHYSIHDIVISYN (1) TSDTVFPGAV                                           | 15 | 3 | 1004 | 1 | 1 | 1 | 1 |
| IPI00312711 | 244  | QDVTINGDFIVRYDYNRSDDSGSIIIEEGYF   | 1        | 124.278 | 162.47 | 162.47  | _YDYN (de) RSDSGSIIIEEGYFVHFAPENIPTM (ox) SK              | YDYN (1) RSDSGSIIIEEGYFVHFAPEN                                           | 4  | 4 | 936  | 1 | 1 | 1 | 1 |
| IPI00719927 | 144  | SENSPIGHSVIQVKANDSQGANAEIDYTFH    | 1        | 109.497 | 109.5  | 109.5   | _AN (de) DSDQGAN (de) AEIDYTFHQAPEVVR                     | AN (1) DSDQGAN (1) AEIDYTFHQAPEV                                         | 2  | 3 | 936  | 1 | 1 | 1 | 1 |
| IPI00136925 | 70   | VERNIRIVVPINNREINISDPTSPIRNRFVYH  | 1        | 86.7722 | 196.71 | 86.772  | _EN (de) ISDPTSPIRR                                       | EN (86.77) ISDPTSPIRR                                                    | 2  | 2 | 693  | 1 | 1 | 1 | 1 |
| IPI00116105 | 320  | IQDVIADVGIKIDFTNQSDFADTKDPTITI    | 1        | 105.627 | 188.39 | 105.63  | _FSM (ox) SDTYDIQDVIADVGIKIDFTN (de) QSDFADTK             | FSMSDTYDIQDVIADVGIKIDFTN (1) QSI                                         | 24 | 4 | 930  | 1 | 1 | 1 | 1 |
| IPI01026704 | 341  | EIKSIASEPTKHFNFVSDIAIIVTVKRAIG    | 1        | 146.296 | 179.74 | 146.3   | _HFFN (de) VSDIEAIIVTVK                                   | HFFN (1) VSDIEAIIVTVK                                                    | 4  | 2 | 917  | 1 | 1 | 1 | 1 |
| IPI00309249 | 490  | SINVSASAQKPIYINCSCTVGGASAKTGS     | 1        | 183.598 | 183.6  | 183.6   | _QPIYIN (de) CSCVTVGGASAK                                 | QPIYIN (1) CSCVTVGGASAK                                                  | 6  | 2 | 957  | 1 | 1 | 1 | 1 |
| IPI00119063 | 2503 | GGCQDICIITHQGHVNSCRGGRIIQEDFTC    | 1        | 88.9277 | 106.49 | 104.06  | _INN (de) GGCQDICIITHQGHVN (de) CCSR                      | INN (0.115) N (0.885) GGCQDICIITHQ                                       | 19 | 3 | 906  | 1 | 1 | 1 | 1 |
| IPI00122592 | 79   | PVRIKEQVVIQAQNCSCSKGGSIPIPPI      | 1        | 88.9922 | 195.46 | 88.992  | _IKEQVVIQAQ (de) N (de) CSCESK                            | IKEQVVIQAQ (1) N (1) N (1) CSCESK                                        | 13 | 3 | 727  | 1 | 1 | 1 | 1 |
| IPI00308990 | 180  | KPGIKVISAIAQHSINFSECEQVVPFPAISTI  | 1        | 119.557 | 119.56 | 119.56  | _YISIAQHSIN (de) FSCCEQVR                                 | YISIAQHSIN (1) FSCCEQVR                                                  | 11 | 3 | 687  | 1 | 1 | 1 | 1 |
| IPI00310059 | 170  | KRENAPSKKSIKCKTNQSCIVIDSTEKVPN    | 1        | 128.738 | 162.43 | 128.74  | _TN (de) QSCIVIDSTEK                                      | TN (128.74) QSCIVIDSTEK                                                  | 2  | 2 | 813  | 1 | 1 | 1 | 1 |
| IPI00135560 | 143  | QIQISQDSSGRKIVSNVSEASVSKMNAFQ     | 1        | 69.6016 | 101.2  | 69.602  | _YSN (de) VSCEASVSK                                       | YSN (69.6) VSCEASVSK                                                     | 3  | 2 | 634  | 1 | 1 | 1 | 1 |
| IPI00123196 | 298  | IAQHXYIVVYIHNNTISAVGQDFCRAGHP     | 1        | 54.2531 | 94.45  | 54.253  | _YIQVVIYHN (de) N (de) N (de) ISAVGQN (de) DFCR           | YIQVVIYHN (1) N (1) N (1) ISAVGQN (1)                                    | 11 | 3 | 877  | 1 | 1 | 1 | 1 |
| IPI00130420 | 357  | PGVFAQSKPDSAEVNSAVCAFPKIYVND      | 1        | 84.9425 | 146.76 | 84.942  | _QIGASPSDDIIFGVPAGSKPDSAEVNVN (de) R                      | QIGASPSDDIIFGVPAGSKPDSAEVNVN (1)                                         | 27 | 3 | 983  | 1 | 1 | 1 | 1 |
| IPI00469426 | 390  | VFKTNSQVSDVRAMNISASSMTITKSNVD     | 1        | 149.298 | 149.3  | 149.3   | _AM (ox) N (de) ISASSM (ox) TITWK                         | AMN (1) ISASSMTITWK                                                      | 3  | 2 | 787  | 1 | 1 | 1 | 1 |
| IPI00894970 | 244  | KGNVANKWISSEFINKISASAREPPSENGTS   | 1        | 65.4716 | 108.58 | 65.472  | _ISEEFIKN (de) ISASAR                                     | ISEEFIKN (1) ISASAR                                                      | 8  | 2 | 783  | 1 | 1 | 1 | 1 |
| IPI00120761 | 660  | TYTKISVDPGKIVSNSSARGWVHPHIGIYR    | 1        | 146.959 | 162.37 | 146.96  | _ISVDPGKIVSN (de) SSAR                                    | ISVDPGKIVSN (1) SSAR                                                     | 11 | 2 | 766  | 1 | 1 | 1 | 1 |
| IPI00848693 | 951  | ERIDCYPDEHGASEANCSARGCIWEASNTTR   | 1        | 66.9649 | 147.17 | 66.965  | _IDCYPDEHGASEAN (de) CSAR                                 | IDCYPDEHGASEAN (1) CSAR                                                  | 14 | 3 | 685  | 1 | 1 | 1 | 1 |
| IPI00114958 | 82   | GSPTYFSPKYIIEKGNCSAQSGIAWQCDKCF   | 1        | 83.8336 | 112.82 | 83.834  | _EGN (de) CSAQSGIAWQCDKCFDAEEAATGECTATVGR                 | EGN (1) CSAQSGIAWQCDKCFDAEEAATG                                          | 3  | 4 | 956  | 1 | 1 | 1 | 1 |
| IPI00126769 | 345  | ETEDDYGYGHVQTCNFSAQMAKVIINDSYE    | 1        | 114.068 | 139.04 | 139.04  | _NIGIETEDDYGYGHVQTCN (de) FSAQM (ox) AK                   | NIGIETEDDYGYGHVQTCN (1) FSAQM/N                                          | 21 | 3 | 1051 | 1 | 1 | 1 | 1 |
| IPI00330594 | 255  | DISSQTQGFQHSMDNISAQIQTVRDGMERA    | 1        | 86.5994 | 175.59 | 175.59  | _GSIQSANISSQTQGFQHSMDN (de) ISAQIQTVR                     | GSIQSANISSQTQGFQHSMDN (1) ISAQI                                          | 23 | 3 | 1160 | 1 | 1 | 1 | 1 |
| IPI00137491 | 118  | NIPWYIAGNHDHIGNVSAQIAYSISKRWN     | 0.999999 | 61.8707 | 173.18 | 74.364  | _NIPWYIAGN (de) HDHIGN (de) VSAQIAYS                      | NIPWYIAGN (1) HDHIGN (1) VSAQIAYS                                        | 16 | 3 | 924  | 1 | 1 | 1 | 1 |
| IPI00553503 | 326  | QRRIFNIYKMDFIIFNYSAPSYIRI         | 1        | 60.5499 | 162.29 | 60.55   | _M (ox) DFIIFN (de) YSAPSYIR                              | MDFIIFN (60.55) YSAPSYIR                                                 | 7  | 3 | 619  | 1 | 1 | 1 | 1 |
| IPI00115482 | 5    | MEAHNVSAFPNFIIPPGFGR              | 1        | 73.9176 | 192.16 | 73.918  | _M (ox) EAHN (de) VSAPFN (de) FSIIPPGFGR                  | MEAHN (1) VSAPFN (1) FSIIPPGFGR                                          | 5  | 3 | 777  | 1 | 1 | 1 | 1 |
| IPI00405437 | 430  | KTERTEVLIQCTVSPNASAPDAWVEDYEFK    | 1        | 57.1445 | 106.11 | 57.145  | _TEVLIQCTVSPN (de) ASAPDAWVEDYEFK                         | TEVLIQCTVSPN (1) ASAPDAWVEDYEFK                                          | 12 | 3 | 956  | 1 | 1 | 1 | 1 |
| IPI00330632 | 1385 | AKVVVDCKEVGQKAINASANTISDGVVEVIGR  | 1        | 103.17  | 207.76 | 103.17  | _AIN (de) ASAN (de) ITSDGVVEVIGR                          | AIN (1) ASAN (1) ITSDGVVEVIGR                                            | 3  | 2 | 895  | 1 | 1 | 1 | 1 |
| IPI00230718 | 276  | GAGEVSPAHESSKPTNISAKFKSYFPMGNF    | 1        | 75.376  | 194.27 | 75.376  | _GAGEVSPAHESSKPTN (de) ISAK                               | GAGEVSPAHESSKPTN (1) ISAK                                                | 16 | 3 | 657  | 1 | 1 | 1 | 1 |
| IPI00877197 | 518  | NKRDAITAVRKMRAINGSALYTGSSIDFVRN   | 1        | 76.3411 | 198.85 | 76.341  | _AIN (de) GSAIYTGSSIDFVR                                  | AIN (1) GSAIYTGSSIDFVR                                                   | 3  | 3 | 591  | 1 | 1 | 1 | 1 |
| IPI00453977 | 437  | RVQGGSSVWGSVITHNSSAITYQSWGRS      | 1        | 55.8436 | 126.86 | 55.844  | _VQGGSSVWGSVITHN (de) SSAIYQSWGR                          | VQGGSSVWGSVITHN (1) SSAIYQSWGR                                           | 15 | 4 | 692  | 1 | 1 | 1 | 1 |
| IPI00131830 | 270  | DEETSCSVIEIKYTGNASAIIPDQGRMQ      | 1        | 83.6916 | 185.27 | 83.692  | _YTG (de) ASAIIPDQ (de) GR                                | YTG (1) ASAIIPDQGR                                                       | 4  | 4 | 564  | 1 | 1 | 1 | 1 |
| IPI00135635 | 269  | DEEISCSVIEIKYTGNASAIIPDQGRMQ      | 1        | 81.3173 | 133.48 | 81.317  | _YTG (de) ASAIIPDQGR                                      | YTG (1) ASAIIPDQGR                                                       | 4  | 2 | 862  | 1 | 1 | 1 | 1 |
| IPI00116913 | 2570 | VVQRGLAAGARQIINANSALIEETIIGHQGR   | 1        | 62.8132 | 205.98 | 62.813  | _QIIAN (de) SSAIIEETIIGHQGR                               | QIIAN (62.81) SSAIIEETIIGHQGR                                            | 5  | 3 | 680  | 1 | 1 | 1 | 1 |
| IPI00421237 | 134  | QEIKITISDVQKFAEINGSALCSYNIKPEYIT  | 0.999949 | 42.9647 | 70.094 | 70.094  | _FAEIN (de) GSAICSYNIKPEYITISK                            | FAEIN (42.96) GSAICSYN (-42.96)                                          | 5  | 4 | 674  | 1 | 1 | 1 | 1 |
| IPI00119522 | 111  | IPRIQDIEITGSPVSNISAHIFSNISSEIEKI  | 1        | 129.082 | 164.79 | 129.08  | _IQ (de) DIEITGSPVSN (de) ISAHIFSN (de) ISSIEK            | IQDIEITGSPVSN (1) ISAHIFSN (1) IS                                        | 13 | 3 | 968  | 1 | 1 | 1 | 1 |
| IPI00109996 | 110  | EQWFRVNRITRITIGYVNSAGGTHIQWMYGC   | 1        | 45.9408 | 194.97 | 45.941  | _TIIGYV (de) Q (de) SAGGTHIQ (de) WM (ox) YCGDVS          | TIIGYV (1) QSAGGTHIQWMYGC (45.94) QSAGGTHIQWMYG                          | 7  | 3 | 1076 | 1 | 1 | 1 | 1 |
| IPI00985828 | 124  | EQSFRVDIRTAIRYVNSAGGSHIQWMAQ      | 1        | 38.9328 | 214.14 | 38.933  | _YVNSAGGSHIQWMAQ (de) AGCDVESDGR                          | YVNSAGGSHIQWMAQ (1) AGCDVESDGR                                           | 3  | 4 | 702  | 1 | 1 | 1 | 1 |
| IPI00123342 | 931  | PRPKDKNGTRAEPINASAGDQEEKVIPPAG    | 1        | 112.549 | 112.55 | 112.55  | _DKN (de) GTRAEPIN (de) ASAGDQEEK                         | DKN (1) GTRAEPIN (1) ASAGDQEEK                                           | 12 | 2 | 1115 | 1 | 1 | 1 | 1 |
| IPI00115458 | 160  | MIKAINRGNVYQAGNHSFAWGMTIDEGIR     | 1        | 81.8069 | 185.61 | 81.807  | _GN (de) YGWQAGN (de) HSAFWGM (ox) TIDEGIR                | GN (1) YGWQAGN (1) HSAFWGM (81.81) YGWQAGN (81.81) HSAFW                 | 9  | 3 | 862  | 1 | 1 | 1 | 1 |
| IPI00331214 | 320  | QNPDNHCFCTEKVINSNCTSYGVIDIGKCKE   | 1        | 112.299 | 161.82 | 112.3   | _YVSN (de) N (de) CTSYGVIDIGK                             | YVSN (112.3) N (1) CTSYGVIDIGK                                           | 4  | 2 | 871  | 1 | 1 | 1 | 1 |
| IPI00515360 | 904  | GTCRCRKNVGRICNECSDGSHISKQNP       | 1        | 93.4937 | 93.494 | 93.494  | _ICN (de) ECSDGSHISK                                      | ICN (93.49) ECSDGSHISK                                                   | 3  | 2 | 828  | 1 | 1 | 1 | 1 |
| IPI00119063 | 1768 | PEKSIYIWSGNHTINRCNIDGSEIEVDTM     | 1        | 101.431 | 101.43 | 101.43  | _IYWISSGN (1) HTIN (1) R                                  | IYWISSGN (101.43) HTIN (101.43)                                          | 12 | 2 | 782  | 1 | 1 | 1 | 1 |
| IPI00330833 | 733  | RVARVTIGPICRAFNECCTIANKRKESPH     | 1        | 122.913 | 228.12 | 122.912 | _AFN (de) ECCTIANK                                        | AFN (122.91) ECCTIAN (-122.91) K                                         | 3  | 2 | 665  | 1 | 1 | 1 | 1 |
| IPI00108003 | 478  | KVIITQSQIPITGIRKHNMTYFCKTHNSVGNSS | 1        | 61.1666 | 76.713 | 61.167  | _VIITQSQIPITGIRKHN (de) M (ox) TYFCK                      | VIITQSQIPITGIRKHN (1) MTYFCK                                             | 15 | 3 | 837  | 1 | 1 | 1 | 1 |
| IPI00127238 | 411  | AGQISQKQETIVTIFDNRVWRQGLVEDIEIP   | 1        | 113.629 | 113.63 | 113.63  | _ETIVTIFDN (de) R                                         | ETIVTIFDN (113.63) R                                                     | 9  | 2 | 605  | 1 | 1 | 1 | 1 |
| IPI00762609 | 112  | ERTVRKIRVYVGNINNETWSRIAFTEHERRR   | 0.5      | 0       | 183.89 | 183.89  | _YVGNIN (de) NETWSR                                       | YVGNIN (0.5) N (0.5) ETWSR                                               | 8  | 2 | 791  | 1 | 1 | 1 | 1 |
| IPI00653675 | 307  | RYHGDPISCAKKINANSTWQPKAKYVFKDV    | 1        | 129.772 | 129.77 | 129.77  | _ITAN (de) STWQ (de) PDKAK                                | ITAN (129.77) STWQPKAK                                                   | 4  | 2 | 731  | 1 | 1 | 1 | 1 |
| IPI00625262 | 83   | TIILIFDGEPCDQSNITWFKSADCYNEIY     | 1        | 159.345 | 159.34 | 159.34  | _FDGEPDQSN (1) ITWFK                                      | FDGEPDQSN (1) ITWFK                                                      | 11 | 3 | 691  | 1 | 1 | 1 | 1 |
| IPI00742385 | 66   | REKIEEHGSMRAFVENITVENSIVFKPHII    | 1        | 87.1601 | 339.57 | 87.16   | _AFVEN (de) ITVIEN (de) SIVFK                             | AFVEN (87.16) ITVIEN (87.16) SIV                                         | 5  | 2 | 913  | 1 | 1 | 1 | 1 |
| IPI00111385 | 169  | RFGNKSAPSETIREVNIITVIDRDK         | 1        | 133.069 | 133.07 | 133.07  | _EVN (de) ITVIDRDK                                        | EVN (133.07) ITVIDRDK                                                    | 3  | 2 | 594  | 1 | 1 | 1 | 1 |
| IPI00323624 | 939  | GVKKTIKVPEGMRIKNTVAIHTIDPEKIGQ    | 1        | 61.7674 | 110.55 | 61.767  | _IN (de) KTVAIHTIDPEKIGQGGVQK                             | IN (61.77) KTVAIHTIDPEKIGQGGVQ                                           | 2  | 3 | 783  | 1 | 1 | 1 | 1 |
| IPI00461861 | 285  | SIEMNKVMEIEKEIANATKPEDRNDPMIY     | 1        | 118.547 | 118.55 | 118.55  | _VM (ox) EIEKEIAN (de) ATTKPEDR                           | VMEIEKEIAN (1) ATTKPEDR                                                  | 10 | 3 | 698  | 1 | 1 | 1 | 1 |
| IPI00403586 | 270  | YFKGNDYFVEAMIVNHNSTIDVRAAARAR     | 1        | 85.1951 | 125.88 | 85.195  | _GNVDFVEAM (ox) IVN (de) N (de) HTSIDVER                  | GN (-74.97) YDFVEAMIVN (74.97) N                                         | 13 | 3 | 814  | 1 | 1 | 1 | 1 |
| IPI00121776 | 51   | GVSSISKDYCMYNNWTRIPSSIENATSIS     | 0.992587 | 18.2576 | 162.93 | 79.633  | _DYCM (ox) YVNS (de) NN (de) WTR                          | DYCMYVNS (0.504) N (0.504) N (0.993) DYCMYVNS (0) N (0) N (18.26) WTR    | 9  | 2 | 859  | 1 | 1 | 1 | 1 |
| IPI00115892 | 119  | DNMIIIGPVKNVTKYGNMTQDQVHMIITRSQ   | 1        | 74.8534 | 89.624 | 74.853  | _YGN (de) M (ox) TQDQVHMIITR                              | YGN (74.85) MTQDQVHMIITR                                                 | 3  | 3 | 617  | 1 | 1 | 1 | 1 |
| IPI00459432 | 157  | GKPYPPYSIAKFSWNNITNSIDIANISADFQ   | 0.561979 | 0       | 47.044 | 47.044  | _FSWN (de) NITN (de) SIDIANISADFQRPVDDPTGAFAN (de) GSITFK | FSWN (0.562) N (0.562) ITN (0.45) SIFSWN (0) N (0) ITN (0) SIDIAN (0) IS | 5  | 4 | 1052 | 1 | 1 | 1 | 1 |
| IPI00125497 | 600  | VITAEKPVGDISSPNETKYIISIDQDSVVK    | 1        | 124.633 | 134.63 | 124.63  | _YSVITAEKPVGDISSPN (de) ETK                               | YSVITAEKPVGDISSPN (1) ETK                                                | 18 | 3 | 750  | 1 | 1 | 1 | 1 |
| IPI00405742 | 1053 | AIERTVVEGMEYVFNITKVFISPAVPEEP     | 1        | 83.3699 | 136.48 | 83.37   | _VTVEGM (ox) EYVFN (de) DTK                               | VTVEGMEYVFN (83.37) DTK                                                  | 12 | 2 | 906  | 1 | 1 | 1 | 1 |
| IPI00272381 | 113  | IENIILKMDSDGFIENITIQRYFPNDEDQV    | 1        |         |        |         |                                                           |                                                                          |    |   |      |   |   |   |   |

|             |      |       |               |           |                |                |          |         |        |        |                                  |                                     |                        |                 |      |      |      |   |   |   |
|-------------|------|-------|---------------|-----------|----------------|----------------|----------|---------|--------|--------|----------------------------------|-------------------------------------|------------------------|-----------------|------|------|------|---|---|---|
| IPI00308971 | 1532 | GHI   | FD            | ISS       | ISGRAGINASYSEK | IVFMSICE       | 1        | 90.827  | 90.827 | 90.827 | _AGIN (de) ASYSEK                | AGIN (90.83) ASYSEK                 | 4                      | 2               | 521  | 1    | 1    | 1 |   |   |
| IPI00224752 | 427  | STGN  | VTNE          | IRVPH     | LHNESWV        | ITPKAKQDYA     | 1        | 84.4684 | 232.5  | 84.468 | _VFHHN (de) ESWV IITPK           | VFHHN (84.47) ESWV IITPK            | 6                      | 3               | 608  | 1    | 1    | 1 |   |   |
| IPI00396840 | 538  | TAVP  | DIYFENAMRFFNF | SWRVTADQ  | LRKAPN         |                | 1        | 130.272 | 130.27 | 130.27 | _FFN (de) FSWR                   | FFN (130.27) FSWR                   | 3                      | 2               | 503  | 1    | 1    | 1 |   |   |
| IPI00230084 | 56   | WIQD  | IG            | IRED      | NEGVYNGS       | WGGRGVITTYCP   | 0.996001 | 23.9634 | 121.02 | 121.02 | _M (ox) STI I IHHQP              | YAWIQDIG IREDN (0.004) MSTI I IHHQP | 28                     | 4               | 983  | 1    | 1    | 1 |   |   |
| IPI00464256 | 239  | IERY  | WISSRAAAIKV   | NDSPVPH   | IWNSTERS       |                | 1        | 125.728 | 125.73 | 125.73 | _AAAIKVN (de) DSVPFH             | IWN (1) STER                        | 7                      | 3               | 772  | 1    | 1    | 1 |   |   |
| IPI00338785 | 1384 | ITKY  | FQMSIEAEKRV   | NASTTD    | PNSTVEQSAI     |                | 1        | 139.109 | 139.11 | 139.11 | _VN (de) ASTTDPN (de) STVEQSAITR | VN (139.11) ASTTDPN (139.11) STV    | 2                      | 2               | 997  | 1    | 1    | 1 |   |   |
| IPI00331032 | 97   | EASF  | ISQCMKYEDV    | NQSTID    | CVDPISSIAA     |                | 1        | 154.602 | 154.6  | 154.6  | _YEVDWN (de) QSTID               | CVDPISSIAAN (1) R                   | 6                      | 3               | 886  | 1    | 1    | 1 |   |   |
| IPI00129168 | 4    |       |               |           |                |                | 1        | 80.3118 | 82.543 | 82.543 | _MAIN (de) SSTDG                 | IK                                  | 4                      | 2               | 634  | 1    | 1    | 1 |   |   |
| IPI00469426 | 549  | IPRGP | DGTG          | EGISSTV   | NGSDTPS        | AVTDIRV        | 1        | 246.773 | 246.77 | 246.77 | _GPDGTEG                         | ISSTVN (de) GSTDPS                  | AVTDIR                 | 13              | 2    | 1218 | 1    | 1 | 1 |   |
| IPI00469218 | 283  | KVEN  | KNAIEIQ       | GMNASS    | IFFIQ          | GVRINM         | 1        | 71.5582 | 202.03 | 71.558 | _AIEIQGMN (ox) N (de) ASSS       | IFFIQGVR                            | 9                      | 3               | 778  | 1    | 1    | 1 |   |   |
| IPI00122973 | 47   | HPRE  | AFIPQ         | GGSVQV    | NCSSSCKED      | ISIGIET        | 1        | 162.09  | 162.09 | 162.09 | _EAFIPQ                          | GGSVQVN (de) CSSSCK                 | 13                     | 2               | 1028 | 1    | 1    | 1 |   |   |
| IPI00223987 | 215  | AIQD  | TRD           | LIHST     | GHNISRV        | TMSAVSSQEK     | 1        | 88.0206 | 139.48 | 88.02  | _DIIHSTGHN (de) ISR              | DIIHSTGHN (88.02) ISR               | 10                     | 3               | 489  | 1    | 1    | 1 |   |   |
| IPI00135686 | 148  | YGP   | GW            | SMANAG    | KDNGSQ         | FFITVKT        | 1        | 133.66  | 133.66 | 133.66 | _DTN (de) GSQFF                  | ITTVK                               | 3                      | 2               | 730  | 1    | 1    | 1 |   |   |
| IPI00134743 | 430  | YGN   | PGYK          | VVDGEREN  | VSMVDY         | AHNNYQAQSAVPIR | 1        | 66.9694 | 110.06 | 66.969 | _VVDGEREN (de) VSM (ox) VDY      | AHNNYQAQSAVPIR                      | 8                      | 3               | 1060 | 1    | 1    | 1 |   |   |
| IPI00128178 | 147  | ISNS  | KAD           | IDT       | ERFQ           | NFSMATDQR      | 1        | 106.492 | 106.49 | 106.49 | _FQN (de) FSM (ox) ATDQR         | FQN (106.49) FSMATDQR               | 3                      | 2               | 681  | 1    | 1    | 1 |   |   |
| IPI00666034 | 2976 | HIRV  | IQIKIT        | YESG      | FINYSK         | FVESKVESQHV    | 1        | 154.357 | 154.36 | 154.36 | _ITYESG                          | FIN (de) YSK                        | 9                      | 2               | 712  | 1    | 1    | 1 |   |   |
| IPI00459432 | 185  | DFQ   | QR            | PVDD      | PTGAFANG       | SITFKVQFSRSRGR | 0.999998 | 58.4203 | 119.54 | 119.54 | _FSWN (de) NITNS                 | IDIANISADFG                         | QR                     | 33              | 4    | 1052 | 1    | 1 | 1 |   |
| IPI00221669 | 400  | FSSA  | QKARISGNS     | IHNAS     | PEHIA          | YAGSVITV       | 1        | 127.582 | 152.06 | 127.58 | _ISGN (de) SIHN (de) ASI         | PEHIA                               | YAGSVITV               | 8               | 3    | 837  | 1    | 1 | 1 |   |
| IPI00122411 | 498  | YID   | IESK          | VINEECKEN | ENESIN         | AARGDKMNVG     | 0.999991 | 50.6066 | 180.88 | 50.606 | _VINEECKEN (de) ESIN             | AAR                                 | 9                      | 2               | 995  | 1    | 1    | 1 |   |   |
| IPI00308990 | 317  | RIDR  | NPSPDE        | IPQVGN    | ISIKGN         | PIDSESHS       | 1        | 74.7637 | 146.1  | 74.76  | _IDRNPSPDE                       | IPQVGN (1) ISIK                     | 15                     | 3               | 698  | 1    | 1    | 1 |   |   |
| IPI00331318 | 198  | QAQ   | YWHDP         | IKESV     | RNYS           | FIADINQ        | 1        | 170.22  | 259.68 | 170.22 | _N (de) YSIFI                    | ADINQ                               | 2                      | 1               | 792  | 1    | 1    | 1 |   |   |
| IPI0098518  | 1253 | EGY   | YSCAHS        | PIGKANTS  | IEIIE          | EGVRVKMN       | 1        | 108.716 | 160.48 | 108.72 | _AN (de) TSIEI                   | IEGVR                               | 1                      | 2               | 473  | 1    | 1    | 1 |   |   |
| IPI00169617 | 174  | AFNK  | VD            | LEAR      | VHGPNASH       | YTSIMTI        | 1        | 97.0952 | 97.095 | 97.095 | _VHGPN (de) ASHYTS               | IM (ox) ITWER                       | 5                      | 3               | 789  | 1    | 1    | 1 |   |   |
| IPI00947577 | 73   | RNR   | FPESG         | DAARD     | NVNCSG         | YVEHEPIEIGKS   | 0.99998  | 47.0386 | 151.41 | 47.038 | _DNVN (de) CSGV                  | YVEHEPIEIGK                         | 4                      | 3               | 688  | 1    | 1    | 1 |   |   |
| IPI00760106 | 58   | PGEM  | KKE           | IRIAGG    | ENCSGR         | VEIKIHDK       | 1        | 82.5498 | 89.624 | 82.55  | _IAGGEN (de) N (de) CSGR         | VEIK                                | 7                      | 2               | 803  | 1    | 1    | 1 |   |   |
| IPI00153317 | 250  | TEAC  | QK            | ITFP      | NSTINTS        | IGVIAQGEAIP    | 0.850582 | 7.55314 | 80.067 | 80.067 | _ITFPNSTIN (de) TSGV             | IAQGEAIP                            | 4                      | 9               | 853  | 1    | 1    | 1 |   |   |
| IPI00116913 | 3261 | SRII  | LIGG          | IPVSGT    | FHNFSG         | CISNVFVQR      | 0.998694 | 28.8364 | 95.48  | 28.836 | _IIGGIPVSGT                      | FHNF (de) FSGCISNVFVQR              | 14                     | 3               | 941  | 1    | 1    | 1 |   |   |
| IPI00222489 | 276  | DI    | ISSSEM        | VHRIVAN   | ISGCAAV        | NSETIMCC       | 1        | 111.645 | 204.23 | 111.65 | _IVAN (de) ISGCAAVN (de) SETIM   | CCIR                                | 4                      | 3               | 786  | 1    | 1    | 1 |   |   |
| IPI00223231 | 133  | IAG   | FP            | TRVFF     | QAFTK          | NGSGATIP       | 1        | 92.6894 | 137.23 | 92.689 | _FFQAFTKN (de) GSGAT             | IPGAGANVQTR                         | 8                      | 3               | 852  | 1    | 1    | 1 |   |   |
| IPI00515360 | 3011 | PEHE  | ASFKIT        | VPSSQ     | NSSFR          | IRSPVSI        | 1        | 80.6901 | 80.69  | 80.69  | _ITVPSSQN (de) SSFR              | IRSPVSI                             | 8                      | 2               | 662  | 1    | 1    | 1 |   |   |
| IPI00387318 | 190  | ANSM  | FNDT          | IEIY      | IVANES         | PKPIPIPKKKG    | 0.999995 | 53.4536 | 104.9  | 53.453 | _NEDRPI                          | APCGAIA                             | NSM (ox) FN (de) DTIEI | IVAN (de) ESDPK | 21   | 4    | 1111 | 1 | 1 | 1 |
| IPI00128269 | 41   | AVM   | NHRV          | CPVEN     | WSYNES         | CSPPDAEQGGPK   | 0.952679 | 13.0389 | 163.95 | 13.038 | _HVCPVEN                         | WSYN (de) ESCSP                     | DAEQGGPK               | 11              | 3    | 949  | 1    | 1 | 1 |   |
| IPI00118291 | 239  | FGT   | VIFV          | SKVIEEP   | KNVSC          | ETRFKTD        | 1        | 116.511 | 116.51 | 116.51 | _VIEEPKN (de) VSCETR             | ETRFKTD                             | 7                      | 2               | 781  | 1    | 1    | 1 |   |   |
| IPI00118987 | 99   | SFAE  | IKH           | KFW       | SEWQ           | NCATKSNY       | 1        | 133.148 | 133.15 | 133.15 | _FIWSEPN (de) CSATK              | NCATKSNY                            | 8                      | 2               | 785  | 1    | 1    | 1 |   |   |
| IPI00153632 | 471  | DTWK  | TI            | ISEV      | RFVHN          | TSALIK         | 1        | 102.4   | 102.4  | 102.4  | _FVHVN (de) TSAI                 | IK                                  | 5                      | 2               | 615  | 1    | 1    | 1 |   |   |
| IPI00894972 | 270  | KVIV  | ITD           | GEAS      | DKGN           | ISAAHD         | 1        | 101.637 | 101.64 | 101.64 | _VIVITD                          | GEASDKGN (de) ISAAHD                | 15                     | 3               | 833  | 1    | 1    | 1 |   |   |
| IPI00153143 | 96   | ISK   | DD            | IEYAF     | EKVVW          | NTYIEIK        | 1        | 74.9442 | 88.898 | 74.944 | _WVGN (de) WTYE                  | IK                                  | 2                      | 2               | 649  | 1    | 1    | 1 |   |   |
| IPI00121378 | 361  | IGD   | TIP           | VSCT      | ISASRN         | ATVVM          | 1        | 103.563 | 103.56 | 103.56 | _N (de) ATVV                     | VM (ox) K                           | 1                      | 2               | 483  | 1    | 1    | 1 |   |   |
| IPI00119095 | 151  | CHC   | PK            | KEG       | YSIPT          | SNTFP          | 1        | 96.6486 | 133.58 | 96.648 | _EGTYSIPTSN (de) FTVP            | DI                                  | 10                     | 2               | 1573 | 1    | 1    | 1 |   |   |
| IPI00311405 | 139  | CEFA  | TPT           | NGRES     | QIN            | ITVMAK         | 1        | 106.492 | 106.49 | 106.49 | _ESQIN (de) ITVM                 | AK                                  | 5                      | 2               | 626  | 1    | 1    | 1 |   |   |
| IPI00338785 | 1391 | SIEA  | EKRV          | NASTDP    | NSTVEQ         | SAITDR         | 1        | 139.109 | 139.11 | 139.11 | _VN (de) ASTTDPN (de) STVEQ      | SAITR                               | 9                      | 2               | 997  | 1    | 1    | 1 |   |   |
| IPI00128984 | 58   | IEK   | RRQ           | QCEEAQ    | IENETT         | GCCKM          | 1        | 158.576 | 158.58 | 158.57 | _QQCIEEAQIEN (de) ETTG           | CCK                                 | 11                     | 2               | 1063 | 1    | 1    | 1 |   |   |
| IPI00138342 | 79   | RFAP  | PQ            | AP        | PAE            | PSVFN          | 1        | 52.3715 | 52.372 | 52.372 | _N (de) ATSY                     | PPMCSQDAGWAK                        | 1                      | 1               | 951  | 1    | 1    | 1 |   |   |
| IPI00315576 | 346  | HP    | FE            | RVN       | IT             | IRWFS          | 1        | 103.433 | 103.43 | 103.43 | _WFSFN (de) GTS                  | WQK                                 | 5                      | 1               | 665  | 1    | 1    | 1 |   |   |
| IPI00114350 | 154  | AEQ   | TR            | KIT       | DVET           | VQINQ          | 1        | 91.6567 | 91.657 | 91.657 | _KITDVET                         | VQIN (de) QTSR                      | 11                     | 2               | 867  | 1    | 1    | 1 |   |   |
| IPI00116913 | 926  | YAH   | MAI           | QPR       | IVAR           | INVTSP         | 1        | 83.3966 | 83.397 | 83.397 | _IN (de) VTS                     | PDIFR                               | 2                      | 2               | 582  | 1    | 1    | 1 |   |   |
| IPI00466999 | 239  | TIC   | TIV           | TGR       | MISAF          | NTS            | 1        | 96.6404 | 96.64  | 96.64  | _M (ox) ISAFN (de) ATSG          | K                                   | 6                      | 2               | 572  | 1    | 1    | 1 |   |   |
| IPI00120848 | 258  | FNS   | ISS           | ITD       | DTF            | CKAND          | 1        | 100.966 | 128.38 | 100.97 | _VIHQFN (de) SISS                | ITD                                 | 21                     | 4               | 697  | 1    | 1    | 1 |   |   |
| IPI00122973 | 469  | EMNG  | TYV           | CHAF      | SSHGN          | TRVNV          | 1        | 71.735  | 73.138 | 71.735 | _SVKQEM (ox) N (de) GTYV         | CHAFSSHGN (de) VTR                  | 3                      | 3               | 876  | 1    | 1    | 1 |   |   |
| IPI00120187 | 166  | FSK   | TR            | HI        | ER             | IYDHN          | 1        | 60.5976 | 141.88 | 60.598 | _IYIDHN (de) N (de) ITR          | ITR                                 | 20                     | 2               | 631  | 1    | 1    | 1 |   |   |
| IPI00114457 | 82   | EVPP  | GP            | IPEA      | VIAI           | YNSTR          | 1        | 67.8798 | 67.88  | 67.88  | _IASPPSQ                         | VEVPPGP                             | IPEAVIAIYN (de) STR    | 24              | 5    | 553  | 1    | 1 | 1 |   |
| IPI00856861 | 232  | F     | IR            | PV        | DD             | WSI            | 1        | 57.5196 | 162.59 | 57.52  | _KFN (de) STQIA                  | AMAPEHEEPR                          | 3                      | 3               | 692  | 1    | 1    | 1 |   |   |
| IPI00117312 | 164  | KF    | SR            | DV        | FIP            | KPSW           | 1        | 90.3665 | 90.367 | 90.367 | _DVFIP                           | KPSWGN (de) HTP                     | IFR                    | 11              | 3    | 671  | 1    | 1 | 1 |   |
| IPI00128178 | 253  | AH    | VE            | Q         | EVK            | QEV            | 1        | 35.7403 | 275.84 | 35.74  | _VINN (de) ITN                   | DIR                                 | 4                      | 2               | 587  | 1    | 1    | 1 |   |   |
| IPI00626793 | 824  | PA    | VV            | G         | IK             | DVNS           | 1        | 81.6489 | 190.37 | 81.648 | _IDVNSWIEN (de) FTK              | ITDK                                | 9                      | 2               | 734  | 1    | 1    | 1 |   |   |
| IPI00114206 | 553  | RIR   | ITD           | NM        | FCAG           | FKNV           | 1        | 82.4546 | 116.35 | 82.454 | _ITDNM (ox) FCAG                 | FKNV (de) DTK                       | 13                     | 2               | 939  | 1    | 1    | 1 |   |   |
| IPI00876541 | 270  | HTY   | K             | M         | D              | YNS            | 1        | 104.63  | 172.91 | 104.63 | _M (ox) DYN                      | SFQGT                               | TPSN (de) ETK          | 12              | 2    | 868  | 1    | 1 | 1 |   |
| IPI00130764 | 289  | VRC   | P             | M         | A              | G              | 1        | 87.5193 | 87.519 | 87.519 | _CPM (ox) AGIS                   | H                                   | 21                     | 4               | 886  | 1    | 1    | 1 |   |   |
| IPI00346062 | 237  | I     | G             | H         | P              | N              | 1        | 49.2477 | 83.723 | 49.247 | _DAHFN (de) STI                  | TEF                                 | GETIN                  | 5               | 3    | 815  | 1    | 1 | 1 |   |
| IPI00751912 | 676  | T     | K             | D         | G              | A              | 1        | 59.3449 | 73.296 | 59.345 | _IDGAT                           | VDTHH                               | IPVN (de) VTIR         | 14              | 3    | 654  | 1    | 1 | 1 |   |
| IPI01026704 | 1102 | I     | W             | K         | P              | T              | 1        | 87.0009 | 87.001 | 87.001 | _AHFSSIN (de) ITIR               | ITIR                                | 7                      | 2               | 630  | 1    | 1    | 1 |   |   |
| IPI00109996 | 200  | E     | G             | C         | V              | E              | 1        | 147.623 | 170.89 | 147.62 | _YIKN (de) GN (de) AT            | IIR                                 | 6                      | 2               | 633  | 1    | 1    | 1 |   |   |
| IPI00985828 | 214  | E     | G             | C         | V              | E              | 1        | 147.623 | 170.89 | 147.62 | _YIKN (de) GN (de) AT            | IIR                                 | 6                      | 2               | 633  | 1    | 1    | 1 |   |   |
| IPI00138209 | 392  | T     | Q             | D         | K              | I              | 1        | 114.498 | 114.5  | 114.5  | _AN (de) YTI                     | IK                                  | 2                      | 2               | 412  | 1    | 1    | 1 |   |   |
| IPI00123814 | 194  | V     | Y             | S         | E              | N              | 1        | 110.633 | 110.63 | 110.63 | _YM (ox) AIAIN (de) R            | YMAIAIN (1) R                       | 7                      | 2               | 485  | 1    | 1    | 1 |   |   |
| IPI00111793 | 415  | E     | C             | R         | D              | A              | 1        | 91.5493 | 108.7  | 91.549 | _CVAN (de) YTG                   | N (de) GR                           | 4                      | 2               | 557  | 1    | 1    | 1 |   |   |
| IPI00221669 | 515  | A     | P             | I         | T              | R              | 1        | 92.3071 | 98.443 | 92.307 | _KHQV                            | TGYGIN (de) GTG                     | DSN (de) DFWR          | 11              | 3    | 806  | 1    | 1 | 1 |   |
| IPI00113539 | 528  | Q     | R             | D         | C              | I              | 1        | 30.5108 | 199.41 | 30.51  | _DQC                             | I                                   | 13                     | 2               | 1099 | 1    | 1    | 1 |   |   |
| IPI00848693 | 1572 | N     | H             | N         | T              | I              | 1        | 89.9108 | 89.911 | 89.911 | _RQDP                            | VSWN (de) K                         | T                      | 8               | 3    | 660  | 1    | 1 | 1 |   |
| IPI00136012 | 605  | Y     | T             | V         | S              | S              | 1        | 215.081 | 215.08 | 215.08 | _YTVS                            | S                                   | 17                     | 4               | 996  | 1    | 1    | 1 |   |   |
| IPI00338209 | 204  | I     | R             | P         | H              | S              | 1        | 56.2251 | 98.898 | 56.225 | _QIFFN (de) GT                   | ETIR                                | 15                     | 2               | 664  | 1    | 1    | 1 |   |   |
| IPI00114206 | 413  | V     | I             | T         | A              | A              | 1        | 79.9422 | 127.58 | 79.942 | _WVITA                           | AHCI                                | 1                      | 7               | 1059 | 1    | 1    | 1 |   |   |
| IPI00677395 | 68   | V     | N             | D         | K              | S              | 1        | 85.9581 | 85.958 | 85.958 | _TMFN (1) STE                    | IK                                  | 4                      | 2               | 544  | 1    | 1    | 1 |   |   |
| IPI00113539 | 1006 | Q     | A             | T         | T              | I              | 1        | 148.409 | 209.66 | 148.41 | _IDAPT                           | N (1) IQFVN (de) E                  | 11                     | 2               | 868  | 1    | 1    | 1 |   |   |
| IPI00113539 | 542  | V     | N             | D         | T              | F              | 1        | 65.2255 | 125.5  | 65.225 | _RHEEGHM (ox) IN (de) C</        |                                     |                        |                 |      |      |      |   |   |   |







|             |      |                                   |          |         |        |        |                                                  |                                                              |    |   |      |   |   |
|-------------|------|-----------------------------------|----------|---------|--------|--------|--------------------------------------------------|--------------------------------------------------------------|----|---|------|---|---|
| IPI00135010 | 949  | VYTMISSHDQFTKYINFSTSEKEKTSVVEHR   | 1        | 97.2141 | 97.214 | 97.214 | _YIN(de)FSTSEKEK                                 | YIN(97.21)FSTSEKEK                                           | 3  | 2 | 674  | 1 | 1 |
| IPI00135975 | 505  | SSSHSPPEEQKMWLNWSDTIRHSRTIQIDPN   | 1        | 57.3483 | 94.767 | 57.348 | _M(ox)VLWN(de)DSTIR                              | MVLWN(57.35)DSTIR                                            | 5  | 5 | 626  | 1 | 1 |
| IPI00117986 | 243  | NASSVPHRHGHFTGFNGSTIRDNIGAGYAD    | 1        | 59.1551 | 68.809 | 59.155 | _HGHFTGFN(de)GSTIR                               | HGHFTGFN(59.16)GSTIR                                         | 8  | 3 | 478  | 1 | 1 |
| IPI00406603 | 820  | TIIRNIGIDENFVINSSTEHRSSSHENDM     | 0.999993 | 51.8091 | 223.11 | 62.055 | _NIGIDEN(de)FVIN(de)SSTEHR                       | N(0.002)IGIDEN(0.998)FVIN(1)SN(-28.18)IGIDEN(28.18)FVIN(     | 12 | 3 | 687  | 1 | 1 |
| IPI00229992 | 543  | QPEIGCIRVAVSPANISREERREVFISVPG    | 1        | 75.7391 | 103.34 | 75.739 | _VVAVSPAN(de)ISREER                              | VVAVSPAN(75.74)ISREER                                        | 8  | 3 | 510  | 1 | 1 |
| IPI00338209 | 347  | QRWRWIDPSSHPGIGNISRDIIREDIAGRI    | 1        | 49.1875 | 127.36 | 49.188 | _IWDPSSHPGIGN(de)ISR                             | IWDPSSHPGIGN(49.19)ISR                                       | 12 | 2 | 854  | 1 | 1 |
| IPI00130015 | 275  | FASMGMEARIRIITNNSQPTIISPQEVVSC    | 1        | 70.7009 | 136.86 | 70.701 | _IITN(de)N(de)SQPTIISPQEVVSCSPYAGQCDGGFPYIAGK    | IITN(1)N(1)SQPTIISPQEVVSCSPYAGQCDGGFPYIAGK                   | 4  | 4 | 997  | 1 | 1 |
| IPI00130573 | 1067 | HTNAGKIDIDTDFTSNASQPETKAIENLIQ    | 1        | 204.13  | 204.13 | 204.13 | _DIDTDFTSN(de)ASQPETK                            | DIDTDFTSN(204.13)ASQPETK                                     | 9  | 2 | 885  | 1 | 1 |
| IPI00165807 | 335  | IVLIQKIEPEHIQIQNISQEQIAQVATIATK   | 1        | 209.239 | 209.24 | 209.24 | _IEPEHIQIQN(de)ISQEQIAQVATIATK                   | IEPEHIQIQN(209.24)ISQEQIAQVA                                 | 10 | 3 | 935  | 1 | 1 |
| IPI00113158 | 62   | HDQCSPWKNACCSVNTSQEIHKADSRIYFN    | 1        | 85.7073 | 103.21 | 103.21 | _NACCSVN(de)TSQEIHK                              | N(-85.71)ACCSVN(85.71)TSQEIH                                 | 7  | 2 | 825  | 1 | 1 |
| IPI00400016 | 1239 | ATEIEENRKYEQAKNISQDIEKQAARVHEE    | 1        | 131.958 | 193.96 | 131.96 | _YEQAKN(de)ISQDIEK                               | YEQAKN(131.96)ISQDIEK                                        | 6  | 2 | 784  | 1 | 1 |
| IPI00221890 | 27   | GPDIHHEIYPIAKGDNQSPIEIHKTDIKHPD   | 1        | 115.119 | 115.12 | 115.12 | _GDN(de)QSPIEIHKT                                | GDN(115.12)QSPIEIHKT                                         | 3  | 2 | 670  | 1 | 1 |
| IPI00126050 | 351  | QGGIGASQYVEIHKANISKYSIVMEADSGTF   | 1        | 75.0639 | 75.064 | 75.064 | _IWIWTAEEQGGIGASQYVEIHKAN(de)ISK                 | IWIWTAEEQGGIGASQYVEIHKAN(75.064)ISK                          | 24 | 4 | 752  | 1 | 1 |
| IPI00119809 | 543  | SFEGSKAPIPTAIDTNSKTPSIFPCASGAF    | 1        | 52.9273 | 93.21  | 52.927 | _APIPTAIDTN(de)SSKTPSIFPCASGAFSSFR               | APIPTAIDTN(1)SSKTPSIFPCASGAFSSFR                             | 10 | 4 | 758  | 1 | 1 |
| IPI00124666 | 596  | PCDQKPSNARAIWJNGSKSISDQDQGVYV     | 1        | 94.6917 | 120.12 | 94.692 | _AIWIIN(de)GSK                                   | AIWIIN(94.69)GSK                                             | 6  | 2 | 502  | 1 | 1 |
| IPI00985989 | 534  | KNAYAYIGIHSPIRGNSSIPYVPSIQDVI     | 1        | 149.943 | 245.66 | 149.94 | _GN(de)SSIPYVPSIQDVIIEK                          | GN(149.94)SSIPYVPSIQDVIIEK                                   | 2  | 2 | 1080 | 1 | 1 |
| IPI00323857 | 307  | IPDTPQGIIEAARKINASIVTSFVEIPIVSN   | 1        | 87.352  | 127.17 | 87.352 | _KIN(de)ASIVTSFVEIPIVSN(de)VSIR                  | KIN(87.35)ASIVTSFVEIPIVSN(87.35)VSIR                         | 3  | 3 | 797  | 1 | 1 |
| IPI00112614 | 98   | RYPTGPEAGVGVGNFNKSVISRVDAQRII     | 0.984724 | 18.0931 | 141.85 | 141.85 | _YPTGPEAGVGVGN(de)K                              | YPTGPEAGVGVGN(0.015)FN(0.985)YPTGPEAGVGVGN(-18.09)FN(18.0    | 15 | 2 | 824  | 1 | 1 |
| IPI00323857 | 322  | NASIVTSFVEIPIVSNVSRASCCGGVFTT     | 1        | 87.352  | 127.17 | 87.352 | _KIN(de)ASIVTSFVEIPIVSN(de)VSIR                  | KIN(87.35)ASIVTSFVEIPIVSN(87.35)VSIR                         | 18 | 3 | 797  | 1 | 1 |
| IPI00649186 | 417  | PIIRKTCNPETPPIRNSIQCTARQCFAFY     | 0.999699 | 35.2151 | 94.882 | 94.882 | _TCNPETPIR(de)ESIQCPTAR                          | TCN(-35.22)PETPIR(35.22)ES                                   | 11 | 3 | 798  | 1 | 1 |
| IPI00119324 | 114  | DDDYSPCRAIKGETVNTSIPFSFEGIFPPK    | 1        | 89.3739 | 89.374 | 89.374 | _AIKGETVN(de)TSIPFSFEGIFPPK                      | AIKGETVN(89.37)TSIPFSFEGIFPPK                                | 8  | 3 | 799  | 1 | 1 |
| IPI00122257 | 313  | DKNVNTSYGNPIINSSIPEDATIKADINQ     | 0.975138 | 15.9462 | 151.19 | 151.19 | _VEFDKGNVNTSYGNPIIN(de)SSIPEDATIK                | VEFDKGNVNTSYGN(0.025)PIIN(0.VEFDKGN(-41.97)VNTSYGN(-15.20    | 20 | 3 | 1084 | 1 | 1 |
| IPI00378698 | 137  | APPYIWAHKNEMINSSIMRITIRNIEEVE     | 1        | 74.2998 | 140.14 | 140.14 | _NEIM(ox)IN(de)SSIM(ox)R                         | NEIM(1)SSIMR                                                 | 6  | 2 | 671  | 1 | 1 |
| IPI00310519 | 118  | DRDRIISPSAFHDGNSIIRAVDRGDEGV      | 1        | 50.8268 | 116.43 | 50.827 | _IISPSAFHDGN(de)FSIIR                            | IISPSAFHDGN(50.83)FSIIR                                      | 12 | 3 | 668  | 1 | 1 |
| IPI00113057 | 396  | PDCCTKINARIVGGTNASIGEWPPQVSIQVK   | 1        | 53.4532 | 167.51 | 53.453 | _IVGGTN(de)ASIGEWPPQVSIQVK                       | IVGGTN(53.45)ASIGEWPPQVSIQVK                                 | 6  | 3 | 758  | 1 | 1 |
| IPI00138061 | 295  | CTPPYVENAVMISENRSIFSRDIEVFRCH     | 1        | 105.137 | 212.39 | 105.14 | _CTPPYVEN(de)AVM(ox)ISEN(de)R                    | CTPPYVEN(105.14)AVMISEN(105.14)AVMISEN(1)R                   | 6  | 3 | 666  | 1 | 1 |
| IPI00987265 | 1171 | QIEAAKAYITFVPTNHSIETGQNSVIGID     | 1        | 68.4451 | 144.63 | 68.445 | _AYITFVPTN(de)HSIETQ(de)GN(de)N(de)SVIGIDTVR     | AYITFVPTN(1)HSIETQ(1)N(1)SVIAYITFVPTN(68.45)HSIETQ(68.45)I   | 19 | 3 | 984  | 1 | 1 |
| IPI00471081 | 412  | GYWASINPFHKTLYNWSGYPYIIVHKIGDY    | 1        | 138.012 | 143.46 | 138.01 | _TIYN(de)WSGYPYIIVHK                             | TIYN(138.01)WSGYPYIIVHK                                      | 4  | 2 | 846  | 1 | 1 |
| IPI00229820 | 70   | IHSAAASRDIKTASHNFGAIPRVEHPSRGH    | 1        | 105.029 | 138.19 | 105.03 | _DIGTASHN(de)FSGAIPR                             | DIGTASHN(105.03)FSGAIPR                                      | 8  | 3 | 515  | 1 | 1 |
| IPI00123223 | 1142 | ISCISSSWKTEIQRNASFVYTKAIMAYAF     | 1        | 113.987 | 210.41 | 113.99 | _TIEQRN(de)ASFPYTK                               | TIEQRN(113.99)ASFPYTK                                        | 7  | 3 | 563  | 1 | 1 |
| IPI00321190 | 214  | DCMKIVSDQAVTKNSSFIQGFVHVHVKDC     | 1        | 55.9857 | 223.29 | 55.986 | _TN(de)SSFIQGFVHVHVKDCDRIGPGVSDICK               | TN(1)SSFIQGFVHVHVKDCDRIGPGVSDI                               | 2  | 4 | 821  | 1 | 1 |
| IPI00459134 | 152  | CDPCIEDSAAWIREMNCSETISQIQKIDAHF   | 1        | 131.172 | 143.93 | 131.17 | _EM(ox)N(de)CSETISQIQK                           | EMN(131.17)CSETISQIQK                                        | 3  | 3 | 529  | 1 | 1 |
| IPI00666034 | 2126 | RAAISRPQQIHHYINASDWERQVAGAKEKI    | 1        | 75.3164 | 102.64 | 75.316 | _IPQQIHHYIN(de)ASDWER                            | IPQQIHHYIN(75.32)ASDWER                                      | 10 | 3 | 670  | 1 | 1 |
| IPI00130010 | 1048 | TGEQVTFRCQSPYQNGSDTVCVNSRWIGQ     | 1        | 186.836 | 223.29 | 223.29 | _CQSPYQMN(ox)N(de)GSDTVCVNSR                     | CQSPYQMN(1)GSDTVCVNSR                                        | 8  | 3 | 741  | 1 | 1 |
| IPI00128076 | 269  | DEEISCTVVEIKYKNASAIIFIPDQGRMQ     | 1        | 131.184 | 131.18 | 131.18 | _YKGN(de)ASAIIFIPDQGR                            | YKGN(131.18)ASAIIFIPDQGR                                     | 4  | 2 | 876  | 1 | 1 |
| IPI00307966 | 101  | QCEIISTFGAFVSKNPNITREDYAPVIKI     | 0.880942 | 8.69187 | 136.38 | 136.38 | _GAFVSKN(de)PCNITR                               | GAFVSKN(0.881)PCN(0.119)ITR                                  | 7  | 3 | 489  | 1 | 1 |
| IPI00652728 | 262  | TFPFSKIFTFVSSVNPNIWSEISAIEIIXSI   | 1        | 85.2483 | 85.248 | 85.248 | _IFTPVSSVNPN(de)ITWSEISAIEIIXSI                  | IFTPVSSVNPN(85.25)ITWSEISAIEI                                | 10 | 3 | 849  | 1 | 1 |
| IPI00848693 | 723  | GDTVARPIIHEFYDDNWTGIDRQFIWGGI     | 0.809064 | 6.27095 | 134.32 | 134.32 | _GDTVARPIIHEFYDDN(de)NTWGI                       | GDTVARPIIHEFYDDN(0.809)N(0.19)GDTVARPIIHEFYDDN(6.27)N(-6.2   | 16 | 3 | 902  | 1 | 1 |
| IPI00311405 | 202  | TRIKGEAEYQEIERNPNTVTVISRYRIVPSR   | 0.998201 | 27.4423 | 115.63 | 115.63 | _IKGEAEYQEIERNP(de)GTVTVISR                      | IKGEAEYQEIERN(0.002)PN(0.998)IKGEAEYQEIERN(-27.44)PN(27.44   | 14 | 3 | 826  | 1 | 1 |
| IPI00119063 | 1826 | GTCNKADGSGSVLRNSTIIVMHKVIDESI     | 1        | 87.1843 | 87.184 | 87.184 | _N(de)STIIVMHK(ox)K                              | N(87.18)STIIVMHK                                             | 1  | 2 | 598  | 1 | 1 |
| IPI00923031 | 58   | NVTWRVNTMTGQTANATSIIGTMDAFPKI     | 0.993221 | 21.6589 | 92.8   | 92.8   | _VTNIM(ox)TGQTAN(de)ATSIIGTMDAFPK                | VTN(0.007)IMTGQTAN(0.993)ATSIIVTN(-21.66)IMTGQTAN(21.66)AT   | 11 | 4 | 655  | 1 | 1 |
| IPI00405742 | 798  | WCRGNRCVYEAICSNVTSECPVPVITRIQP    | 1        | 100.187 | 100.19 | 100.19 | _CVYEAICSN(de)VTSECPVPVITR                       | CVYEAICSN(100.19)VTSECPVPVITR                                | 9  | 2 | 1227 | 1 | 1 |
| IPI00515360 | 89   | VSGDFQMVYFRAIVNFTRSEYSPQIEDAS     | 1        | 100.188 | 100.19 | 100.19 | _AIVN(de)FTR                                     | AIVN(100.19)FTR                                              | 4  | 2 | 411  | 1 | 1 |
| IPI00674656 | 107  | SIFPIIHFHKGRIININWQGGTSGVIRIINI   | 1        | 120.627 | 120.63 | 120.63 | _IIN(de)WTQGGTSGVIR                              | IIN(120.63)WTQGGTSGVIR                                       | 4  | 2 | 844  | 1 | 1 |
| IPI00134585 | 316  | VYVQPNQKETAEYAAANIITQAVFDYFEDYFAM | 1        | 63.3721 | 63.372 | 63.372 | _ETAEYAAAN(de)ITQAVFDYFEDYFAM(ox)EYAI            | ETAEYAAAN(1)ITQAVFDYFEDYFAMEYAIETAEYAAAN(63.37)ITQAVFDYFEDYF | 8  | 3 | 1143 | 1 | 1 |
| IPI00126834 | 225  | ERETVKEIQVYISPRNNTISVHPSTRIQEGG   | 1        | 118.757 | 118.76 | 118.76 | _N(de)TTISVHPSTR                                 | N(118.76)TTISVHPSTR                                          | 1  | 2 | 607  | 1 | 1 |
| IPI00225715 | 501  | VYVYGGQQRGSISSPNVTISCKDTYCNIGWT   | 1        | 85.5541 | 85.554 | 85.554 | _ISSSPN(de)VTISCK                                | ISSSPN(85.55)VTISCK                                          | 6  | 2 | 647  | 1 | 1 |
| IPI00118987 | 228  | RFPNQKAVAFVKNVNNITINDEAAMVEAVAI   | 0.762554 | 6.2661  | 91.603 | 91.603 | _NVN(de)ITINDEAAM(ox)VEAVAINPVSAFVETDFIM(ox)YK   | N(0.18)NVN(0.763)ITIN(0.057)DEN(-6.27)VNN(6.27)ITIN(-11.24   | 4  | 4 | 1051 | 1 | 1 |
| IPI00674255 | 717  | TSTCERDVRVSHVINDTHMFKSIPSSRKEK    | 1        | 60.4896 | 91.961 | 60.49  | _VSHVIN(de)DTHM(ox)K                             | VSHVIN(60.49)DTHMK                                           | 6  | 2 | 649  | 1 | 1 |
| IPI00123040 | 119  | IIVRVNKGPIANPIWNVGTGDRWIRAEIA     | 0.999995 | 53.3626 | 114.63 | 114.63 | _GPIANPIWN(de)VTGTGTR                            | GPIANPIWN(-53.36)PIWN(53.36)VTGTG                            | 9  | 2 | 851  | 1 | 1 |
| IPI00120222 | 415  | ITTSTVQVQIEPYANYFTVKSQNRVSGID     | 1        | 108.496 | 108.5  | 108.5  | _GVHFSPPAAAGITSTVQVQIEPYAN(de)YFTVTK             | GVHFSPPAAAGITSTVQVQIEPYAN(1)GVHFSPPAAAGITSTVQVQIEPYAN(1      | 26 | 3 | 1125 | 1 | 1 |
| IPI00124640 | 539  | KVGNVEGEGHCFHNDQTCCKDSAGVWACCP    | 1        | 103.272 | 130.11 | 103.27 | _VGNVEGEGHCFHND(de)QTCCK                         | VGN(-103.27)VEGEGHCFHND(103.27)VEGEGHCFHND(1)QTCCK           | 15 | 3 | 804  | 1 | 1 |
| IPI00132600 | 899  | IHSGPPYVYFIEEGYNSRKGQNMVCGGGM     | 1        | 81.4796 | 81.48  | 81.48  | _SIAQYIHSPPYVYFIEEGYN(de)YSSR                    | SIAQYIHSPPYVYFIEEGYN(81.48)YSSR                              | 21 | 3 | 960  | 1 | 1 |
| IPI00223714 | 77   | AIKKATAAAGYDVEKNRRIKIGKISVSKG     | 0.967104 | 14.6833 | 117.2  | 117.2  | _AIAAAGYDVEKN(de)NSR                             | AIAAAGYDVEKN(0.967)N(0.033)SR                                | 12 | 2 | 790  | 1 | 1 |
| IPI01026704 | 1083 | ATIITCHIIPSDVSNQVNSIHWKPTIKAHF    | 1        | 55.0512 | 55.051 | 55.051 | _IATIITCHIIPSDVSNQV(de)VSIIHWKPTIK               | IATIITCHIIPSDVSNQV(1)VSIIHWKPTIATIITCHIIPSDVSNQV(55.05)VSII  | 17 | 4 | 824  | 1 | 1 |
| IPI00400016 | 1105 | VKVDQNMIDRIRQRVNSIHSISRIQIRN      | 1        | 90.9131 | 96.604 | 90.913 | _VN(de)SSIHSQISR                                 | VN(90.91)SSIHSQISR                                           | 2  | 2 | 615  | 1 | 1 |
| IPI00125813 | 83   | YKQENNIINAEHGNSIFINENSTFESFGY     | 0.987838 | 18.2165 | 95.108 | 95.108 | _QENNIINAEHGN(de)SSIFIEN(de)STFESFGYHSVSPDR      | QENNIIN(0.223)AEHGN(0.988)SQEN(-34.77)N(-34.77)IIN(-5        | 14 | 4 | 1018 | 1 | 1 |
| IPI00170146 | 130  | EVIHNPDAIGVIFNDSFSYQIKVIRMYGN     | 1        | 73.753  | 119.8  | 73.753 | _IIGVPSIEDIDEVIHNN(de)IPDAIGVIFN(de)DSFSYQ(de)IK | IIGVPSIEDIDEVIHNN(1)IPDAIGVIFNIGVPSIEDIDEVIHNN(73.75)IPDA    | 27 | 3 | 1296 | 1 | 1 |
| IPI00876233 | 64   | FYCRFTECCEERPINTSAIKIDIEEKIFGQ    | 1        | 66.0679 | 78.505 | 66.068 | _FTECCEERPIN(de)TSAIK                            | FTECCEERPIN(66.07)TSAIK                                      | 12 | 2 | 1047 | 1 | 1 |
| IPI00119063 | 2476 | IPQPMGLIAVANDNSCEISPCRNNGGQ       | 0.896978 | 9.39851 | 75.3   | 75.3   | _VDIPQPMGLIAVANDN(de)SCEISPCR                    | VDIPQPMGLIAVAN(0.103)DTN(0.8)VDIPQPMGLIAVAN(-9.4)DTN(9.4     | 18 | 4 | 726  | 1 | 1 |
| IPI00420867 | 376  | FHFINITRSQSNINTVNDVWFKCPKPKIVE    | 0.999963 | 44.3208 | 135.02 | 135.02 | _QSINTVN(de)DTVWK                                | QSIN(-44.32)TVN(44.32)DTVWK                                  | 7  | 2 | 703  | 1 | 1 |
| IPI00108098 | 197  | EDNQIIVKKGFCADNSTVSENPEDWVPNT     | 0.987097 | 19.0605 | 123.44 | 123.44 | _KGFCEADN(de)STVSENPEDWVPNTGEGM(ox)EK            | KGFCEADN(0.987)STVSEN(0.012)N                                | 8  | 3 | 1121 | 1 | 1 |
| IPI00132460 | 91   | KKYVYIERVQREKANGTVHVGHPSKVVI      | 1        | 80.3118 | 80.312 | 80.312 | _AN(de)GTVHVGHPSK                                | AN(80.31)GTVHVGHPSK                                          | 2  | 3 | 474  | 1 | 1 |
| IPI00876306 | 80   | IDICVSENETIKHISNDITTPESTMTVGQAR   | 1        | 122.44  | 122.44 | 122.44 | _HISN(de)DITTPESTMTVGQAR                         | HISN(122.44)DITTPESTMTVGQAR                                  | 4  | 2 | 1032 | 1 | 1 |
| IPI00400016 | 1437 | NKAHEAERIASAVQKNATSTKADAERTFGEV   | 1        | 102.277 | 102.28 | 102.28 | _IASAVQKN(de)ATSTK                               | IASAVQKN(102.28)ATSTK                                        | 8  | 2 | 660  | 1 | 1 |
| IPI00396840 | 186  | SEAERKAQYVYRACMNETRIEIRAKPIIMEI   | 1        | 82.3618 | 118.87 | 82.362 | _ACM(ox)N(de)ETRIEIR                             | ACMN(82.36)ETRIEIR                                           | 4  | 2 | 770  | 1 | 1 |
| IPI00131168 | 484  | YEIEFVFGPIGRVNYTRAEEIFPSRIMKT     | 1        | 79.4662 | 79.466 | 79.466 | _VN(de)YTRAEEIFSR                                | VN(79.47)YTRAEEIFSR                                          | 2  | 2 | 743  | 1 | 1 |
| IPI00968978 | 454  | GDQYSCMVGHEAIPMNFTQKTDRISGKPTN    | 1        | 111.769 | 149.52 | 111.77 | _GDQYSCMVGHEAIPMN(1)FTQK                         | GDQYSCMVGHEAIPMN(111.77)FTQ                                  | 17 | 3 | 825  | 1 | 1 |
| IPI00153756 | 118  | GIIAGAAFKPEYNRINETIYENAKIISDNDK   | 1        | 88.0283 | 177.83 | 88.028 | _IIN(de)ETIYENAK                                 | IIN(88.03)ETIYENAK                                           | 3  | 2 | 655  | 1 | 1 |
| IPI00467600 | 1283 | GIEKVIIEKKNRCDNNDTIIVRKGCKGCSQQ   | 0.951793 | 12.9543 | 147.26 | 147.26 | _CDN(de)DTIIVR                                   | CDN(-12.95)N(12.95)DTIIVR                                    | 4  | 2 | 611  | 1 | 1 |
| IPI00987951 | 499  | FDEFFSQGAPGVEKNSTICDICIGPIKCAP    | 1        | 171.255 | 175.28 | 171.26 | _N(de)STICDICIGPIK                               | N(171.26)STICDICIGPIK                                        | 1  | 2 | 746  | 1 | 1 |
| IPI00130325 | 181  | GKRIPKMTQIIGITPNATHIRPPRDCQEIF    | 1        | 62.8132 | 70.96  | 62.813 | _M(ox)TQIIGITPN(de)ATHIRPPR                      | MTQIIGITPN(62.81)ATHIRPPR                                    | 10 | 4 | 543  | 1 | 1 |
| IPI00153187 | 139  | MDAYEVSNADFEKFNSTGYITEAEKFGDSF    | 1        | 73.4663 | 73.466 | 73.466 | _FVN(de)STGYITEAEK                               | FVN(73.47)STGYITEAEK                                         | 3  | 3 | 487  | 1 | 1 |
| IPI00320605 | 51   | DCIQSGPGCSWCQKINFPGPEPDSIRCDTR    | 1        |         |        |        |                                                  |                                                              |    |   |      |   |   |





|             |      |        |          |         |        |        |         |    |   |      |   |   |
|-------------|------|--------|----------|---------|--------|--------|---------|----|---|------|---|---|
| IPI00875419 | 216  | PSEEA  | 1        | 62.2028 | 278.4  | 62.203 | _AVISM  | 7  | 3 | 681  | 1 | 1 |
| IPI00117094 | 59   | RCDP   | 0.999999 | 58.7639 | 178.15 | 178.15 | _IAM    | 10 | 2 | 765  | 1 | 1 |
| IPI00109727 | 42   | ACIVN  | 0.985871 | 18.4394 | 205.18 | 205.18 | _HEN    | 3  | 3 | 724  | 1 | 1 |
| IPI00875419 | 206  | TVTKK  | 1        | 102.903 | 102.9  | 102.9  | _VIVAPP | 11 | 2 | 729  | 1 | 1 |
| IPI00226714 | 223  | QMEEI  | 1        | 121.246 | 149.32 | 121.25 | _SSQSN  | 5  | 3 | 962  | 1 | 1 |
| IPI00356462 | 560  | IQMISD | 1        | 124.434 | 124.43 | 124.43 | _ISN    | 2  | 2 | 932  | 1 | 1 |
| IPI00122493 | 181  | CPRMV  | 1        | 79.7113 | 139.11 | 108.18 | _YHYN   | 4  | 3 | 732  | 1 | 1 |
| IPI00621027 | 800  | ENIYS  | 1        | 102.505 | 102.5  | 102.5  | _N      | 1  | 2 | 693  | 1 | 1 |
| IPI00133500 | 408  | IIPMN  | 0.839534 | 6.32225 | 136.68 | 136.68 | _QSQP   | 22 | 3 | 905  | 1 | 1 |
| IPI00109108 | 596  | TAMAN  | 0.999982 | 44.4403 | 265.77 | 171.76 | _T      | 10 | 3 | 634  | 1 | 1 |
| IPI00125530 | 330  | DNTEY  | 1        | 83.087  | 83.087 | 83.087 | _EM     | 5  | 2 | 803  | 1 | 1 |
| IPI00320204 | 476  | EVFP   | 1        | 81.3376 | 88.087 | 81.338 | _IN     | 2  | 2 | 489  | 1 | 1 |
| IPI00416285 | 297  | HCRHS  | 1        | 64.954  | 64.954 | 64.954 | _HSPV   | 13 | 4 | 821  | 1 | 1 |
| IPI00623114 | 1904 | SIIIP  | 1        | 95.903  | 185.26 | 185.26 | _G      | 8  | 2 | 753  | 1 | 1 |
| IPI00314443 | 558  | NCQF   | 1        | 84.6583 | 84.658 | 84.658 | _KCQEA  | 7  | 3 | 442  | 1 | 1 |
| IPI00119299 | 647  | VGIGN  | 1        | 102.4   | 102.4  | 102.4  | _HDPN   | 4  | 2 | 755  | 1 | 1 |
| IPI00830749 | 868  | ITSQ   | 0.933806 | 11.4945 | 213.99 | 213.99 | _QI     | 9  | 3 | 776  | 1 | 1 |
| IPI00128989 | 255  | QTIQ   | 1        | 190.67  | 190.67 | 190.67 | _QI     | 9  | 3 | 869  | 1 | 1 |
| IPI00466733 | 326  | RFFDH  | 1        | 73.4642 | 195.23 | 73.464 | _F      | 8  | 3 | 762  | 1 | 1 |
| IPI00115530 | 63   | IYISA  | 1        | 39.3881 | 77.907 | 39.388 | _I      | 16 | 4 | 896  | 1 | 1 |
| IPI00170006 | 306  | HRHFN  | 0.999993 | 51.5542 | 91.62  | 91.62  | _EVM    | 4  | 2 | 738  | 1 | 1 |
| IPI00120245 | 941  | KSIIW  | 0.999982 | 47.5163 | 97.095 | 74.944 | _EN     | 4  | 2 | 611  | 1 | 1 |
| IPI00323624 | 1617 | IYMW   | 1        | 88.5651 | 88.565 | 88.565 | _YIM    | 6  | 3 | 892  | 1 | 1 |
| IPI00881745 | 174  | IAGFD  | 0.750612 | 7.69283 | 103.71 | 103.71 | _N      | 2  | 2 | 775  | 1 | 1 |
| IPI00406302 | 64   | GDAFI  | 1        | 156.702 | 156.7  | 156.7  | _EIVH   | 7  | 3 | 1072 | 1 | 1 |
| IPI00387289 | 489  | PGSP   | 1        | 110.923 | 110.92 | 110.92 | _DGASE  | 9  | 2 | 641  | 1 | 1 |
| IPI00320420 | 327  | CSTN   | 1        | 84.1734 | 156.08 | 84.173 | _Q      | 4  | 2 | 702  | 1 | 1 |
| IPI00471081 | 72   | IKTVI  | 1        | 71.5582 | 196.64 | 71.558 | _T      | 14 | 2 | 1019 | 1 | 1 |
| IPI00284816 | 585  | VSIGV  | 1        | 116.347 | 116.35 | 116.35 | _D      | 5  | 3 | 891  | 1 | 1 |
| IPI00115116 | 88   | VVGIS  | 1        | 87.258  | 119.53 | 87.258 | _Q      | 3  | 2 | 515  | 1 | 1 |
| IPI00340140 | 126  | TASPR  | 1        | 103.534 | 103.53 | 103.53 | _ATSQ   | 7  | 3 | 964  | 1 | 1 |
| IPI00381303 | 497  | RISHY  | 1        | 183.358 | 183.36 | 183.36 | _EIN    | 3  | 2 | 867  | 1 | 1 |
| IPI00316469 | 624  | AGMAN  | 0.999672 | 37.9308 | 361.2  | 202.34 | _T      | 10 | 3 | 700  | 1 | 1 |
| IPI00420835 | 284  | VSDDI  | 1        | 122.326 | 122.33 | 122.33 | _AN     | 2  | 2 | 555  | 1 | 1 |
| IPI00321348 | 325  | GERRI  | 1        | 92.3103 | 149.73 | 92.31  | _I      | 12 | 3 | 749  | 1 | 1 |
| IPI00405742 | 761  | SFGKN  | 1        | 95.4173 | 122.39 | 95.417 | _I      | 7  | 2 | 730  | 1 | 1 |
| IPI00626950 | 320  | VIKDP  | 1        | 88.5072 | 240.2  | 88.507 | _V      | 3  | 2 | 784  | 1 | 1 |
| IPI00230718 | 61   | QHYP   | 1        | 115.064 | 115.06 | 115.06 | _M      | 6  | 3 | 639  | 1 | 1 |
| IPI00122973 | 204  | REI    | 1        | 58.8484 | 169.25 | 58.848 | _T      | 15 | 2 | 1109 | 1 | 1 |
| IPI00828688 | 350  | AGEYI  | 1        | 65.7918 | 159.8  | 159.8  | _V      | 9  | 2 | 1046 | 1 | 1 |
| IPI00138180 | 535  | EDSN   | 0.793969 | 6.15565 | 137.72 | 137.72 | _F      | 21 | 3 | 946  | 1 | 1 |
| IPI00125266 | 341  | TIFID  | 1        | 135.83  | 135.83 | 135.83 | _CIN    | 3  | 2 | 502  | 1 | 1 |
| IPI00223987 | 447  | NWGI   | 1        | 126.705 | 126.71 | 126.71 | _EET    | 8  | 3 | 638  | 1 | 1 |
| IPI00137958 | 82   | GSRA   | 1        | 75.0178 | 75.018 | 75.018 | _ATHA   | 13 | 3 | 612  | 1 | 1 |
| IPI00471273 | 133  | IPQDV  | 1        | 88.5406 | 88.541 | 88.541 | _G      | 25 | 3 | 1179 | 1 | 1 |
| IPI00466733 | 475  | IQSQ   | 1        | 182.886 | 182.89 | 182.89 | _ECS    | 8  | 2 | 781  | 1 | 1 |
| IPI00473880 | 459  | GDQV   | 1        | 80.8588 | 111.4  | 80.859 | _G      | 17 | 3 | 825  | 1 | 1 |
| IPI00137792 | 518  | PGSSH  | 0.942615 | 12.1753 | 68.046 | 68.046 | _YQ     | 24 | 3 | 1373 | 1 | 1 |
| IPI00308885 | 103  | DKYKI  | 0.333333 | 0       | 73.11  | 73.11  | _I      | 7  | 3 | 854  | 1 | 1 |
| IPI00850698 | 584  | KESK   | 0.99977  | 36.3894 | 99.451 | 99.451 | _V      | 12 | 2 | 896  | 1 | 1 |
| IPI00139788 | 513  | FDEF   | 1        | 152.876 | 208.72 | 152.88 | _N      | 1  | 2 | 746  | 1 | 1 |
| IPI00118674 | 54   | IYIP   | 1        | 69.6388 | 109.68 | 69.639 | _I      | 3  | 4 | 845  | 1 | 1 |
| IPI00129243 | 162  | NIIT   | 1        | 91.9612 | 91.961 | 91.961 | _K      | 5  | 2 | 624  | 1 | 1 |
| IPI00131091 | 1387 | GTIKI  | 1        | 76.3779 | 180.64 | 135.09 | _TYN    | 9  | 3 | 811  | 1 | 1 |
| IPI00128269 | 37   | VYAM   | 0.5      | 0       | 189.82 | 189.82 | _H      | 7  | 3 | 949  | 1 | 1 |
| IPI00473880 | 474  | NF     | 1        | 223.177 | 223.18 | 223.18 | _I      | 2  | 2 | 1166 | 1 | 1 |
| IPI00221833 | 314  | PVYR   | 0.5      | 0       | 142.26 | 142.26 | _D      | 6  | 3 | 801  | 1 | 1 |
| IPI00169870 | 276  | EIDC   | 1        | 50.9863 | 116.06 | 50.986 | _AM     | 3  | 4 | 828  | 1 | 1 |
| IPI00881836 | 320  | CSEEA  | 1        | 75.239  | 75.239 | 75.239 | _KIN    | 3  | 3 | 825  | 1 | 1 |
| IPI00111908 | 135  | YMES   | 0.981166 | 19.6323 | 88.992 | 84.14  | _V      | 8  | 3 | 765  | 1 | 1 |
| IPI00116509 | 656  | GNEK   | 1        | 104.455 | 104.45 | 104.45 | _VTIN   | 4  | 2 | 761  | 1 | 1 |
| IPI00114065 | 325  | SKIT   | 1        | 70.8373 | 70.837 | 70.837 | _ITDT   | 14 | 3 | 720  | 1 | 1 |
| IPI00119299 | 567  | KPIPI  | 0.998359 | 27.843  | 109.65 | 109.65 | _Y      | 5  | 3 | 1027 | 1 | 1 |
| IPI00130624 | 234  | WRIS   | 1        | 198.867 | 198.87 | 198.87 | _E      | 8  | 2 | 845  | 1 | 1 |
| IPI00881745 | 179  | PSQD   | 0.826355 | 4.81185 | 130.83 | 130.83 | _N      | 7  | 2 | 1162 | 1 | 1 |
| IPI00114065 | 325  | SKIT   | 1        | 70.8373 | 70.837 | 70.837 | _ITDT   | 10 | 3 | 720  | 1 | 1 |
| IPI00459432 | 166  | AKFS   | 0.973536 | 17.6725 | 63.008 | 63.008 | _F      | 14 | 3 | 1402 | 1 | 1 |
| IPI00129010 | 124  | VSAVS  | 1        | 82.5896 | 164.53 | 82.59  | _CFM    | 5  | 3 | 766  | 1 | 1 |
| IPI00406603 | 959  | EDTD   | 0.500918 | 0       | 94.08  | 94.08  | _G      | 26 | 3 | 1121 | 1 | 1 |
| IPI00131223 | 1069 | PSRAY  | 1        | 109.845 | 109.84 | 109.84 | _V      | 3  | 3 | 458  | 1 | 1 |
| IPI00115089 | 129  | STPIY  | 1        | 116.238 | 116.24 | 116.24 | _I      | 3  | 2 | 630  | 1 | 1 |
| IPI00468814 | 437  | SYNG   | 0.999807 | 37.1416 | 134.3  | 134.3  | _NIN    | 3  | 2 | 561  | 1 | 1 |
| IPI00111960 | 390  | RWGY   | 1        | 66.2987 | 97.431 | 66.299 | _Q      | 5  | 2 | 497  | 1 | 1 |
| IPI00134585 | 669  | FAIAR  | 1        | 72.2004 | 96.113 | 72.2   | _I      | 4  | 2 | 599  | 1 | 1 |
| IPI00109946 | 70   | TIHTK  | 0.99572  | 23.6666 | 136.5  | 136.5  | _I      | 7  | 2 | 623  | 1 | 1 |
| IPI00133103 | 216  | DYFG   | 1        | 108.564 | 162.32 | 108.56 | _V      | 9  | 3 | 514  | 1 | 1 |
| IPI00409393 | 339  | IRYGE  | 1        | 59.5022 | 117.3  | 59.502 | _Y      | 14 | 3 | 660  | 1 | 1 |
| IPI00310059 | 90   | SKEYS  | 0.527651 | 0       | 50.869 | 50.869 | _AN     | 9  | 3 | 1068 | 1 | 1 |
| IPI00123040 | 210  | PHFIR  | 1        | 70.536  | 201.27 | 201.27 | _I      | 11 | 2 | 1112 | 1 | 1 |
| IPI00134390 | 332  | DVSKY  | 1        | 101.974 | 101.97 | 101.97 | _RN     | 2  | 2 | 596  | 1 | 1 |
| IPI00165807 | 80   | HNSH   | 1        | 41.9364 | 48.607 | 41.936 | _I      | 9  | 4 | 1037 | 1 | 1 |
| IPI00119809 | 572  | AFFSR  | 1        | 147.561 | 209.79 | 147.56 | _V      | 10 | 2 | 886  | 1 | 1 |
| IPI00469426 | 257  | TSVGT  | 1        | 87.4985 | 88.075 | 87.498 | _ITWS   | 7  | 2 | 722  | 1 | 1 |
| IPI00265291 | 323  | DVEID  | 1        | 95.0939 | 95.094 | 95.094 | _V      | 3  | 2 | 649  | 1 | 1 |
| IPI00121421 | 306  | NTAD   | 1        | 95.6224 | 95.622 | 95.622 | _APSN   | 4  | 2 | 1042 | 1 | 1 |
| IPI01026847 | 220  | PIKFD  | 0.999992 | 51.2191 | 85.006 | 85.006 | _I      | 10 | 2 | 798  | 1 | 1 |
| IPI00263041 | 249  | DAFIK  | 0.985623 | 18.3605 | 93.823 | 93.823 | _NFN    | 3  | 2 | 802  | 1 | 1 |
| IPI00788443 | 734  | TGEQ   | 1        | 132.735 | 137.44 | 132.74 | _C      | 8  | 2 | 1103 | 1 | 1 |
| IPI00115793 | 467  | IKIVK  | 1        | 99.2826 | 99.283 | 99.283 | _Y      | 4  | 2 | 573  | 1 | 1 |
| IPI00316359 | 543  | ATFYI  | 0.8004   | 6.03147 | 59.585 | 59.585 | _Q      | 5  | 3 | 811  | 1 | 1 |
| IPI00121120 | 1398 | TQMFI  | 1        | 107.055 | 107.06 | 107.06 | _EASN   | 5  | 2 | 678  | 1 | 1 |
| IPI00469426 | 425  | SIYVK  | 1        | 95.5698 | 95.57  | 95.57  | _I      | 11 | 2 | 832  | 1 | 1 |



IPI00316469 620 GYQIAGMANRTTIVDNNWNNSHIAIVGKAM 0. 997687 25. 8924 336. 04 291. 18 \_TTIVDN (de) N (de) TWNN (de) SHIAIVGK\_ 291. 18 TTIIVDN (0. 998) N (0. 973) TWNN (0. 102) TTIIVDN (25. 89) N (15. 27) TWNN (-10 6 2 1051 1 1

|             |      |                                  |          |         |        |         |                                                               |                                                                                |    |   |      |   |   |
|-------------|------|----------------------------------|----------|---------|--------|---------|---------------------------------------------------------------|--------------------------------------------------------------------------------|----|---|------|---|---|
| IPI00121378 | 265  | TIQVIPPKNAIKEGDNTIQCIGNGNPPPEE   | 0.999799 | 36.3174 | 88.708 | 88.708  | _EGDN (de) ITIQICIGN (de) PPPPEEM (ox) FYIPGGPEGIR_           | EGDN (1) ITIQICIGN (0.138) GN (0.86) EGDN (36.32) ITIQICIGN (-7.98) GN         | 4  | 4 | 903  | 1 | 1 |
| IPI00348266 | 316  | EQRNVRTIPHHQYNATINKYSHDIAIEI     | 1        | 56.5691 | 145.81 | 56.569  | _TIPHHQYN (de) ATIN (de) K_                                   | TIPHHQYN (1) ATIN (1) K                                                        | 8  | 2 | 770  | 1 | 1 |
| IPI00285117 | 330  | FGFNARQRYVEDIVINETINKNRIGQRTK    | 1        | 64.7495 | 120.87 | 120.87  | _QRVEDIVIN (de) ETINK_                                        | QRVEDIVIN (64.75) ETIN (-64.75)                                                | 9  | 3 | 579  | 1 | 1 |
| IPI00126827 | 172  | APSPCSIQGVYVGTNTVINCSPRSPKPTAQ   | 0.986528 | 18.6467 | 109.85 | 88.627  | _VIVPPAPSPCSIQGVYVGTN (de) VTINCK_                            | VIVPPAPSPCSIQGVYVGTN (0.987) VIVPPAPSPCSIQGVYVGTN (18.65)                      | 21 | 3 | 957  | 1 | 1 |
| IPI00338018 | 601  | IIKTTQGSKIYIKGWNETIIVNEIKSKESDI  | 1        | 68.7543 | 128.95 | 128.95  | _GVN (de) ETIIVNEIK_                                          | GVN (68.75) ETIIVN (-68.75) EIK                                                | 3  | 2 | 665  | 1 | 1 |
| IPI00468236 | 803  | DFKNTDKNENPYIGINYTCRYDRFRNPPH    | 0.999999 | 60.643  | 113.01 | 113.01  | _NTDKNENPYIGIGN (de) YTICR_                                   | NTDKNENPYIGIGN (1) YTICR                                                       | 13 | 3 | 710  | 1 | 1 |
| IPI00119063 | 3663 | CGTGVKTCPIDEFQNCNTICKPIAWKDCGDE  | 1        | 70.9421 | 172.93 | 70.942  | _TCPIDEFQNCN (de) N (de) TICKPIAWK_                           | TCPIDEFQNCN (1) N (1) TICKPIAWK                                                | 10 | 3 | 833  | 1 | 1 |
| IPI00331175 | 312  | KTAFAPDPVPICIGNARTIANRNFDTCAKMQ  | 1        | 143.249 | 143.25 | 143.25  | _TAFAPDPVPICIGN (de) R_                                       | TAFAPDPVPICIGN (143.25) R                                                      | 15 | 3 | 581  | 1 | 1 |
| IPI00123223 | 1426 | EVSNNVNIIYDQVNTQIAFSTIIQQDIPV    | 0.999958 | 48.4934 | 173.59 | 103.12  | _TEVSNNVNIIYDQVNT (de) QTIAFSTIIQQDIPVR_                      | TEVSNNVNIIYDQVNT (1) QTIAFSTIIQQDIPVR                                          | 17 | 4 | 949  | 1 | 1 |
| IPI00626555 | 241  | HVHVDIQSFGINDINMTHYIKHISFGEDYP   | 0.959757 | 13.7747 | 192.57 | 139.7   | _SFQQSHVHVDIQSFGINDIN (de) M (ox) THYIK_                      | SFQQSHVHVDIQSFGINDIN (0.04) IN (0.0) SFQQSHVHVDIQSFGINDIN (-13.77) I           | 21 | 4 | 804  | 1 | 1 |
| IPI00222967 | 265  | EKVFPFIFNINPATTNFGTSCQPQSAQIRIN  | 0.997677 | 26.5955 | 94.389 | 92.034  | _VPFIFNINPATTN (de) FTGSCQPQSAQIR_                            | VPFIFNIN (0.002) PATTN (0.998) FTVPFIFN (-38.59) IN (-26.6) PATTN              | 13 | 4 | 728  | 1 | 1 |
| IPI00405742 | 1005 | AFEPIRSFSVGGRSINVTGGQFSIIQKFAV   | 1        | 55.196  | 233.02 | 55.196  | _SIN (de) VTGGQFSIIQK_                                        | SIN (55.2) VTGGQFSIIQK                                                         | 3  | 3 | 498  | 1 | 1 |
| IPI00113797 | 331  | PTIPPVSHFIIGWVFNITGQDVIKIQSDV    | 1        | 65.2071 | 65.207 | 65.207  | _TPTIPPVSHFIIGWVFN (de) ITGQDVIK_                             | TPTIPPVSHFIIGWVFN (1) ITGQDVIK                                                 | 17 | 3 | 963  | 1 | 1 |
| IPI00118674 | 572  | SSPTNTTYVQYAIANTIGKATNITREQCQD   | 1        | 125.587 | 125.59 | 125.59  | _SYIDDRPIQHYIAVSSPTN (de) TTYVQYAIAN (de) ITGK_               | SYIDDRPIQHYIAVSSPTN (1) TTYVQY/SYIDDRPIQHYIAVSSPTN (125.59) T                  | 30 | 3 | 1268 | 1 | 1 |
| IPI00400202 | 168  | PDIEPIVKAIEYFNNTGHSHIFAIREVKS    | 0.85176  | 7.60631 | 89.866 | 89.866  | _HAIEYFN (de) NTGHSHIFAIR_                                    | HAIEYFN (0.148) N (0.852) NTGHSHIFAIEYFN (-7.61) N (7.61) N (-32.9             | 8  | 3 | 748  | 1 | 1 |
| IPI00132474 | 406  | DGVTINKYSYCKNGVNGTGENGRKCSNISIG  | 1        | 76.8199 | 265.12 | 76.82   | _SYCKN (de) GVN (de) GTGEN (de) GRK_                          | SYCKN (1) GTGEN (1) GRK                                                        | 8  | 2 | 872  | 1 | 1 |
| IPI00322575 | 917  | PGQQPPIIIVNKTGAKIDDFHISIEQ       | 0.96407  | 14.2865 | 61.499 | 38.691  | _QSDYCWEIFAPHM (ox) YFITPGQQPPIIIVN (de) K_                   | QSDYCWEIFAPHMYFITPGQQPPIITN (0. QSDYCWEIFAPHMYFITPGQQPPIITN (                  | 32 | 5 | 784  | 1 | 1 |
| IPI00468055 | 281  | GPIETIKIMESHNPNGTFSAKGYSVCEVD    | 1        | 65.8954 | 97.463 | 65.895  | _IM (ox) ESHPN (de) GTFSAK_                                   | IMESHPN (1) GTFSAK                                                             | 7  | 2 | 718  | 1 | 1 |
| IPI00123652 | 198  | IDYVYGRITRISLTNETFRKTQIYP        | 1        | 131.819 | 131.82 | 131.82  | _ISITN (de) ETRFK_                                            | ISITN (131.82) ETRFK                                                           | 5  | 2 | 605  | 1 | 1 |
| IPI00132474 | 50   | CGECIQAGPNCWCNTTTFIQEGMPTSARCD   | 0.99798  | 26.9388 | 104.38 | 104.38  | _SCGECIQAGPNCWCNTN (de) TTFIQEGM (ox) PTSAR_                  | SCGECIQAGPN (0.002) CGWCTN (0.99) SCGECIQAGPN (-26.94) CGWCTN (26              | 17 | 4 | 853  | 1 | 1 |
| IPI00136938 | 318  | KMTIPTVDVIGRSINGTFPFGKWSVDSVFN   | 1        | 101.929 | 101.93 | 101.93  | _SIN (de) GTFPFGWK_                                           | SIN (101.93) GTFPFGWK                                                          | 3  | 2 | 608  | 1 | 1 |
| IPI00117957 | 275  | IQRITIGNINRTDIEENGTFANIPRVREIHE  | 1        | 85.1641 | 136.3  | 136.3   | _ITDIEN (de) GTFANIPR_                                        | ITDIEN (85.16) GTFANIPR                                                        | 6  | 3 | 521  | 1 | 1 |
| IPI00468055 | 46   | RDFIPSTISFTRWNQNTVEIQGLRTFTPTIR  | 0.995533 | 23.4759 | 84.946 | 69.361  | _DFIPSTISFTWNQCN (de) N (de) TEVIQGITR_                       | DFIPSTISFTWN (0.006) YQN (0.996) DFIPSTISFTWN (-23.48) YQN (23.4               | 15 | 3 | 949  | 1 | 1 |
| IPI00468674 | 606  | SIDAYPVINQAQAMENHTEVHFQKCGCPDNK  | 0.999993 | 51.6499 | 122.49 | 122.49  | _SIDAYPVINQAQAM (ox) EN (de) HTEVHFQK_                        | SIDAYPVIN (0.023) SN (0.977) SIDAYPVINQAQAM (-16.33) SN (16.3                  | 16 | 4 | 698  | 1 | 1 |
| IPI00170146 | 911  | PGQIPQGRITSIIIVNTESNIEDFIQSITKH  | 1        | 93.4997 | 276.68 | 93.5    | _TSIIVIVN (de) N (de) TESN (de) IEDFIQSITK_                   | TSIIVIVN (1) N (1) TESN (1) IEDFIQSITSIIVIVN (93.5) N (93.5) TESN (93.         | 7  | 3 | 794  | 1 | 1 |
| IPI00278602 | 459  | EPIIYMPPPPQPIINTTESIRINHEIRGWV   | 1        | 84.6803 | 84.68  | 84.68   | _AIM (ox) YISEEPIIYMPPPPQPIIN (de) TTESIIR_                   | AIMYISEEPIIYMPPPPQPIIN (1) TTESIIR                                             | 23 | 4 | 836  | 1 | 1 |
| IPI00118674 | 111  | KDIYEYSVWQGWPNWRTERIPQCVRSTVIRI  | 0.977265 | 16.3331 | 121.72 | 121.72  | _DIYEYSVWQGWPN (de) R_                                        | DIYEYSVWQGWPN (0.023) SN (0.977) DIYEYSVWQGWPN (-16.33) SN (16.3               | 15 | 2 | 1008 | 1 | 1 |
| IPI00129220 | 436  | GIVTSTRFRTASVSNQTEPPKVRIEDRSTT   | 1        | 174.592 | 174.59 | 174.59  | _TASVSIN (de) QTEPPKVR_                                       | TASVSIN (174.59) QTEPPKVR                                                      | 7  | 2 | 814  | 1 | 1 |
| IPI00113057 | 494  | EGNDIAIHKIQTPIINTEFKPICIPSKAD    | 1        | 80.6384 | 137.61 | 80.638  | _IQTPIN (de) YTEFKPICIPSK_                                    | IQTPIN (1) YTEFKPICIPSK                                                        | 6  | 3 | 760  | 1 | 1 |
| IPI00311405 | 332  | EATNPIGTIRSGQVEVNIETPPYPTPEHGR   | 1        | 69.7632 | 69.763 | 69.763  | _SGQVEVN (de) IETPPYPTPEHGR_                                  | SGQVEVN (69.76) IETPPYPTPEHGR                                                  | 7  | 3 | 787  | 1 | 1 |
| IPI00890869 | 100  | APAEEKILCQKGSNQTECFNIRFIQYIN     | 0.998158 | 27.3384 | 127.71 | 127.71  | _GKSN (de) QTECFNIR_                                          | GKSN (0.998) QTECFN (0.002) FIR                                                | 4  | 2 | 801  | 1 | 1 |
| IPI00129243 | 106  | IFRSINGVIPEGGAINITDSGYSRVAKIFFS  | 1        | 99.3661 | 128.98 | 99.366  | _SIN (de) GVIPEGGAN (de) ITDSGYSR_                            | SIN (1) GVIPEGGAN (1) ITDSGYSR                                                 | 13 | 2 | 1026 | 1 | 1 |
| IPI00396840 | 382  | VYDKEYIRQVSTIINTDKICINNYMAMNI    | 1        | 67.4565 | 123.95 | 67.456  | _QVSTIIN (de) N (de) TDK_                                     | QVSTIIN (67.46) N (67.46) TDK                                                  | 7  | 2 | 618  | 1 | 1 |
| IPI00123746 | 671  | NIPIMVDSGKPMNITDRIWCVCSCKNSK     | 0.999825 | 37.6457 | 78.456 | 78.456  | _ANYNIPIMVDSGKPMN (ox) TN (de) ITDIR_                         | ANYNIPIMVDSGKPMN (1) ITDIR                                                     | 3  | 3 | 899  | 1 | 1 |
| IPI00127770 | 103  | KTYCANEPISNCSQVNRDICSQVNIETPVV   | 1        | 92.6845 | 165.58 | 165.58  | _TYCANEPISN (de) CSQVNIETPVV_                                 | TYCANEPISN (1) CSQVNIETPVV                                                     | 15 | 2 | 958  | 1 | 1 |
| IPI00131693 | 60   | PCGTASWDAAVTRVWNGDIIADPDIINGSQII | 1        | 137.731 | 137.73 | 137.73  | _VN (de) GTDIIADPDIIN (de) GSIQIIIR_                          | VN (137.73) GTDIIADPDIIN (137.73)                                              | 2  | 2 | 1006 | 1 | 1 |
| IPI00119063 | 4365 | QCACVKNKQGDVTCNCTDGRVAPSCITCID   | 1        | 76.262  | 76.262 | 76.262  | _QTGDVTCN (de) CTDGR_                                         | QTGDVTCN (1) CTDGR                                                             | 8  | 2 | 743  | 1 | 1 |
| IPI00138199 | 1523 | SEDQYCTCPRETFIINTCCKECPGPHYTK    | 1        | 129.343 | 129.34 | 129.34  | _ETFIIN (de) TTCVK_                                           | ETFIIN (129.34) TTCVK                                                          | 6  | 2 | 664  | 1 | 1 |
| IPI01026704 | 882  | SGIEIEIQKDSCESNQNTCRVGYFRTGDDV   | 0.999491 | 32.9331 | 189.3  | 189.3   | _DESCSN (de) ITCR_                                            | DESCSN (0.001) QN (0.999) ITCR                                                 | 8  | 2 | 743  | 1 | 1 |
| IPI00608044 | 277  | FQKWSVVPVIGKEQNYTCHVHHEGPEPIT    | 1        | 93.4953 | 221.47 | 93.495  | _EQN (de) YTCVHHEGPEPITIR_                                    | EQN (1) YTCVHHEGPEPITIR                                                        | 3  | 3 | 820  | 1 | 1 |
| IPI00312980 | 277  | FQKWSVVPVIGKEQNYTCHVHHEGPEPIT    | 0.987172 | 18.8624 | 126.84 | 126.84  | _EQN (de) YTCVHHEGPEPITIR_                                    | EQN (0.987) YTCVHHEGPEPITIR                                                    | 3  | 3 | 803  | 1 | 1 |
| IPI00323053 | 489  | KVNGMKTSRPTDNSINVTGPPYETNGPKTF   | 0.830043 | 6.88762 | 126.26 | 126.26  | _TSRPTDNSIN (de) VTCGPPYETN (de) GPK_                         | TSRPTDNSIN (1) VTCGPPYETN (-6.89) SIN (6.89) VTCGP                             | 10 | 3 | 836  | 1 | 1 |
| IPI00122494 | 193  | PVATEQIISTFTVGNNTCFYKCYCYRETE    | 0.950566 | 12.8395 | 121.39 | 121.39  | _TEVAPVATEQIISTFTVGN (de) NTCFCYK_                            | TEVAPVATEQIISTFTVGN (0.951) N (1) TEVAPVATEQIISTFTVGN (12.84) N                | 20 | 3 | 1007 | 1 | 1 |
| IPI00624663 | 881  | KTVSWAVTPKSIGEVNFTAATAEQSPICEG   | 1        | 95.823  | 241.44 | 95.823  | _SIGEVN (de) FTATAEAQSPICEG (de) KIETVPAIWHK_                 | SIGEVN (1) FTATAEAQSPICEG (1) KISIGEVN (95.82) FTATAEAQSPICEG                  | 6  | 4 | 882  | 1 | 1 |
| IPI00308971 | 2078 | ETVIVTYSKGYPCGGNKATASSVIEITCAK   | 1        | 87.1601 | 87.16  | 87.16   | _GYPCGGN (de) KTASSVIEITCAK_                                  | GYPCGGN (87.16) KTASSVIEITCAK                                                  | 7  | 3 | 705  | 1 | 1 |
| IPI00119063 | 3334 | PTNFYIGDGRCTVSNCTASQVFCVCKNDKIP  | 1        | 63.8937 | 216.27 | 63.894  | _TCVSN (de) CTASQVFCVCKN (de) DK_                             | TCVSN (1) CTASQVFCVCKN (1) DK                                                  | 5  | 3 | 674  | 1 | 1 |
| IPI00408895 | 110  | IGDSRRQPEKTDIAEINETARPISPVPNKIEK | 0.999998 | 57.0046 | 111.77 | 111.77  | _TDAEIN (de) ETARPISPVPNK_                                    | TDAEIN (1) ETARPISPVPNK                                                        | 6  | 2 | 977  | 1 | 1 |
| IPI00123342 | 222  | TATAISYGFVRKIDINSTAQNVFMDFMGSGS  | 0.998752 | 29.0339 | 78.128 | 78.128  | _DIN (de) STAQNV (ox) FYDM (ox) GSGSTVCTIIVTYQTVK_            | DIN (0.999) STAQNV (0.001) VMFYDMGSDIN (29.03) STAQN (-29.03) VMFYD            | 3  | 3 | 1122 | 1 | 1 |
| IPI00400073 | 44   | CRRIQEGHEYDFTDINDTAQCFCKGQSEHS   | 1        | 141.072 | 141.07 | 141.07  | _RIQEGHEYDFTDIN (de) DTAQCFCK_                                | RIQEGHEYDFTDIN (1) DTAQCFCK                                                    | 14 | 3 | 897  | 1 | 1 |
| IPI00626555 | 266  | FGEDYPGVNPIDHTNVAPQASMMFQYFVK    | 0.999305 | 31.5762 | 110.55 | 110.55  | _HISFGEDYPGVNPIDHTN (de) VTAPQASM (ox) M (ox) FQYFVK_         | HISFGEDYPGVNPIDHTN (0.001) PIDHTN (0.915) HISFGEDYPGVNPIDHTN (-31.58) PIDHTN ( | 19 | 4 | 972  | 1 | 1 |
| IPI00400016 | 1221 | SAEAYNIIRITLAGENQATEIEENRKYEQ    | 1        | 111.448 | 239.58 | 111.448 | _TIAGEN (de) QTAIEIEEINR_                                     | TIAGEN (111.45) QTAIEIEEIN (-11                                                | 6  | 2 | 951  | 1 | 1 |
| IPI00129903 | 681  | SIKTIIEGQVFPANPANTAHITPYKFEYHYR  | 1        | 114.507 | 184.6  | 114.507 | _TIEGQVFPAN (de) FTAHITPYK_                                   | TN (-114.06) IEGVFPAN (114.06)                                                 | 13 | 3 | 820  | 1 | 1 |
| IPI00118333 | 288  | TGVMRASFSSREADNHAFIRIKTNASDST    | 1        | 103.083 | 103.08 | 103.08  | _EADN (de) HTAFIR_                                            | EADN (103.08) HTAFIR                                                           | 4  | 2 | 588  | 1 | 1 |
| IPI00226563 | 144  | VAGVQDRVWDTAAANRTAEPNITQSERQIA   | 1        | 90.827  | 90.827 | 90.827  | _VWDTAAAN (de) R_                                             | VWDTAAAN (90.83) R                                                             | 9  | 2 | 559  | 1 | 1 |
| IPI00130117 | 515  | RFHGKVPVEIGINYNITADVAKKEGQIPR    | 0.988969 | 19.5439 | 142.94 | 142.94  | _NVPVEIGINYN (de) ITADVAQK_                                   | NVPVEIGIN (0.011) YN (0.989) ITADVN (-43.28) VPEIGIN (-19.54) YN (             | 11 | 3 | 673  | 1 | 1 |
| IPI00153389 | 149  | RETEQYKEIKSWVQGNITACGRSIFIDEMD   | 1        | 80.3118 | 80.312 | 80.312  | _SWVQGN (de) ITACGR_                                          | SWVQGN (80.31) ITACGR                                                          | 6  | 2 | 675  | 1 | 1 |
| IPI00330714 | 165  | RVDNFRVITGELFTFNNTAAQPVYKFEFPD   | 1        | 52.8241 | 182.49 | 52.824  | _TGEIFTFN (de) TTAAPQPVYKFEFPDGVDSVIVK_                       | TGEIFTFN (1) TTAAPQPVYKFEFPDGVDSVIVK                                           | 8  | 3 | 1172 | 1 | 1 |
| IPI00323053 | 311  | EWTKNIDFRKCNNDNI SYVHCPEPNATK    | 0.947235 | 12.5679 | 122.44 | 122.44  | _KCNSDN (de) ISYVHCPEPN (de) NTK_                             | KCN (0.053) SDN (0.947) ISYVHCPEPN (-12.57) SDN (12.57) ISYVHC                 | 6  | 3 | 809  | 1 | 1 |
| IPI00136642 | 188  | IVSANRIFDGSITFNESYQDVEVYVYGAKI   | 1        | 90.7179 | 317.58 | 90.718  | _SITFN (de) ESYQ (de) DVSEVYVYGAK_                            | SITFN (90.72) ESYQDVEVYVYGAK                                                   | 5  | 2 | 1069 | 1 | 1 |
| IPI00165730 | 520  | NAENAI SARSDINPANGSYPFQAHQRAHGG  | 1        | 63.6823 | 200.77 | 63.682  | _SDIN (de) PAN (de) GSYFPAHQHQR_                              | SDIN (1) PAN (1) GSYFPAHQHQR                                                   | 7  | 3 | 673  | 1 | 1 |
| IPI00154056 | 133  | IAGFPNEVQHFNPNISWQPVPVHTVPIETE   | 0.881192 | 8.07688 | 99.357 | 99.357  | _TIM (ox) SAEANIAIGFPNEVQHFN (de) PN (de) ISWQPVPVHTVPIETEDR_ | TIMSANEANIGFPN (0.237) EVQHFN/TIMSANEAN (-39.32) IAGFPN (-8.                   | 24 | 4 | 1150 | 1 | 1 |
| IPI00129304 | 416  | MQQDMRSKIDTEVANSVMEEMKIVDSKH     | 1        | 59.3449 | 107.5  | 59.345  | _SKIDTEVAN (de) ISVVM (ox) EEM (ox) K_                        | SKIDTEVAN (1) ISVVM (1) EEM (1) K                                              | 9  | 3 | 686  | 1 | 1 |
| IPI00123223 | 871  | HTSSWIIVTKSNVNFNSAEAAQSSPEPG     | 1        | 66.3652 | 209.37 | 66.365  | _SIGN (de) VN (de) FSVSAEAQSSPEPGSEVATVETGRK_                 | SIGN (1) VN (1) FSVSAEAQSSPEPGSEVATVETGRK                                      | 6  | 3 | 1142 | 1 | 1 |
| IPI00405742 | 127  | CGSIFPKGICAIRAMNSISVRIFYEDGSEKS  | 1        | 179.372 | 179.37 | 179.37  | _AMSN (ox) SN (de) ISVR_                                      | AMSN (1) ISVR                                                                  | 2  | 4 | 448  | 1 | 1 |
| IPI00321348 | 461  | AGTVYVGTETASII CNISVRGPPGIRIAAS  | 1        | 181.707 | 181.71 | 181.71  | _GETASII CN (de) ISVR_                                        | GETASII CN (181                                                                |    |   |      |   |   |













|             |      |                                  |          |         |        |        |                                                           |                                                                                 |                                                                                 |    |   |      |   |
|-------------|------|----------------------------------|----------|---------|--------|--------|-----------------------------------------------------------|---------------------------------------------------------------------------------|---------------------------------------------------------------------------------|----|---|------|---|
| IP100648288 | 661  | PCSKHDFVFCGFIICTNITRAPRIGQIQEII  | 1        | 101.532 | 101.53 | 101.53 | _HDVFCGFIICTN(de)ITR_                                     | HDVFCGFIICTN(1)ITR                                                              | HDVFCGFIICTN(101.53)ITR                                                         | 12 | 3 | 619  | 1 |
| IP100153840 | 67   | SIVVQNPQRQTIFFNNGTRAIKDERFQIEEF  | 1        | 72.3207 | 98.04  | 72.321 | _QTIFFN(de)GTR                                            | QTIFFN(1)GTR                                                                    | QTIFFN(72.32)GTR                                                                | 6  | 2 | 543  | 1 |
| IP100136280 | 320  | ERTFNKIFIRPFMQYNSTRAGVDEEDTIR    | 1        | 116.546 | 116.55 | 116.55 | _FIRPFM(ox)QYN(de)STR_                                    | FIRPFMQYN(1)STR                                                                 | FIRPFMQYN(116.55)STR                                                            | 9  | 3 | 526  | 1 |
| IP100649911 | 294  | RQNDIKIKGMSSETISNITQRISITESHVVAI | 1        | 104.41  | 111.79 | 104.41 | _IKGM(ox)SETISN(de)ITQR_                                  | IKGMSSETISN(1)ITQR                                                              | IKGMSSETISN(104.41)ITQR                                                         | 10 | 3 | 532  | 1 |
| IP100458413 | 3465 | RGPPDFSVVQYQDTEENETQAIIVDGDQDKVI | 1        | 44.9549 | 71.623 | 44.955 | _GPPDFSVVQYQDTEEN(de)ETQAIIVDGDQDKVIISGIEPK_              | GPPDFSVVQYQDTEEN(1)ETQAIIVDGDQDKVIISGIEPK                                       | GPPDFSVVQYQDTEEN(44.95)ETQAIIVDGDQDKVIISGIEPK                                   | 15 | 4 | 1025 | 1 |
| IP100458393 | 520  | SGAAAYIEQASSHIGNSTQAARVAVGRPP    | 1        | 57.7348 | 57.735 | 57.735 | _EIGGAIIDSGAAAYIEQASSHIGN(de)STQAARVAVGRPP                | EIGGAIIDSGAAAYIEQASSHIGN(1)STQAARVAVGRPP                                        | EIGGAIIDSGAAAYIEQASSHIGN(57.735)STQAARVAVGRPP                                   | 23 | 3 | 992  | 1 |
| IP100129158 | 297  | EDIQIWIENGVSRNDTPKNTKNTDGTYS     | 1        | 49.0765 | 119.79 | 49.076 | _FYPEDIQIWIEN(de)GN(de)VSRN(de)DTPKN(de)ITK_              | FYPEDIQIWIEN(1)GN(1)VSRN(1)DYPEDIQIWIEN(49.08)GN(49.08)                         | FYPEDIQIWIEN(1)GN(1)VSRN(1)DYPEDIQIWIEN(49.08)GN(49.08)                         | 19 | 3 | 1070 | 1 |
| IP100110808 | 103  | IAYDKANIDVMKERSANTPDANVAPEVTVIS  | 0.333333 | 0       | 89.374 | 89.374 | _ERSN(de)NTPDANVAPEVTVISR_                                | ERSN(0.333)N(0.333)TPDAN(0.33)ERSN(0)N(0)TPDAN(0)VAPEVTVIS                      | ERSN(0.333)N(0.333)TPDAN(0.33)ERSN(0)N(0)TPDAN(0)VAPEVTVIS                      | 4  | 3 | 724  | 1 |
| IP100468674 | 657  | RIQYSRDTKXIFISINVTNSPSSQRAGEDAH  | 1        | 84.8919 | 84.892 | 84.892 | _IFISIN(de)VTN(de)SPSSQ(de)R_                             | IFISIN(1)VTN(1)SPSSQR                                                           | IFISIN(84.89)VTN(84.89)SPSSQR                                                   | 6  | 2 | 833  | 1 |
| IP100111908 | 324  | YKMSMANRQGNQPVINITNRQAFITAQNHGY  | 0.999967 | 44.7697 | 132.79 | 132.79 | _GQNPQVIN(de)ITNR_                                        | GQNPQVIN(1)ITNR                                                                 | GQNPQVIN(44.77)ITN(-4                                                           | 8  | 2 | 678  | 1 |
| IP100116945 | 251  | PGVYTRVSSYRMWIENITNGMNTS         | 0.953196 | 13.0131 | 88.101 | 88.101 | _M(ox)WIEN(de)ITN(de)GNM(ox)TS_                           | M(ox)WIEN(0.953)ITN(0.983)GN(0.06)MWIEN(13.01)ITN(17.54)GN(-13                  | M(ox)WIEN(0.953)ITN(0.983)GN(0.06)MWIEN(13.01)ITN(17.54)GN(-13                  | 5  | 2 | 773  | 1 |
| IP100131116 | 203  | YETKRCKMTIIEAGNMTKVDCTSGFKHEH    | 0.973166 | 15.595  | 78.486 | 78.486 | _TM(ox)TIEAGN(de)NTM(ox)K_                                | TMTIIEAGN(0.973)N(0.027)TMK                                                     | TMTIIEAGN(15.6)N(-15.6)TMK                                                      | 9  | 2 | 729  | 1 |
| IP100222819 | 648  | VMYPRGYPYNGTVNVTMHIRSPI TRAAVI   | 0.9982   | 26.6113 | 99.044 | 99.044 | _GYPYNGTVN(de)VTN(de)VTM(ox)HIR_                          | GYPYNGTVN(0.175)VTN(0.827)VTM(0.96)GYPYNGTVN(6.78)VTN(26.6113)                  | GYPYNGTVN(0.175)VTN(0.827)VTM(0.96)GYPYNGTVN(6.78)VTN(26.6113)                  | 11 | 2 | 1009 | 1 |
| IP100111228 | 617  | STVADAYRFINHVTGNKTKVEEGYVYNNFD   | 1        | 89.8046 | 89.805 | 89.805 | _FIN(de)HTVGN(de)KTK_                                     | FIN(1)HTVGN(1)KTK                                                               | FIN(89.8)HTVGN(89.8)KTK                                                         | 8  | 2 | 631  | 1 |
| IP100622572 | 249  | KVTSSRRFIASFVNVTNKRKADGKRCMLCT   | 0.99917  | 30.807  | 136.93 | 136.93 | _FIASFVNVTN(de)TKTKR_                                     | FIASFVN(0.001)VTN(0.999)TKTKR                                                   | FIASFVN(0.001)VTN(0.999)TKTKR                                                   | 9  | 3 | 500  | 1 |
| IP100129158 | 302  | IWIENGVSRNDTPKNTKNTDGTYSIF       | 1        | 49.0765 | 119.79 | 49.076 | _FYPEDIQIWIEN(de)GN(de)VSRN(de)DTPKN(de)ITK_              | FYPEDIQIWIEN(1)GN(1)VSRN(1)DYPEDIQIWIEN(49.08)GN(49.08)                         | FYPEDIQIWIEN(1)GN(1)VSRN(1)DYPEDIQIWIEN(49.08)GN(49.08)                         | 24 | 3 | 1070 | 1 |
| IP100468814 | 353  | SRYQTVVSSNIDGPNVCTKIIIGNDPIITGI  | 0.999999 | 60.1623 | 161.35 | 161.35 | _YQTVVSSNIDGPNVCTKIIIGNDPIITGI                            | YQTVVSSNIDGPNVCTKIIIGNDPIITGI                                                   | YQTVVSSNIDGPNVCTKIIIGNDPIITGI                                                   | 14 | 3 | 650  | 1 |
| IP100338785 | 1535 | ADEAKQNAQVDIKNATKEKVDKSNEDNIR    | 1        | 68.4106 | 112.17 | 112.17 | _QNAQVDIKNATKEKVDKSNEDNIR                                 | QNAQVDIKNATKEKVDKSNEDNIR                                                        | QNAQVDIKNATKEKVDKSNEDNIR                                                        | 11 | 3 | 516  | 1 |
| IP100127407 | 539  | VFSNPEWKEKYIHENYTKAIAKGVETPCP    | 1        | 89.3546 | 104.2  | 104.2  | _YIHEN(de)YTK_                                            | YIHEN(1)YTK                                                                     | YIHEN(89.35)YTK                                                                 | 5  | 2 | 535  | 1 |
| IP100123658 | 134  | RNIWTEESKQYCTEQNATIVKASQSTLDYI   | 1        | 115.342 | 115.34 | 115.34 | _QYCTEQN(de)ATIVK_                                        | QYCTEQN(1)ATIVK                                                                 | QYCTEQN(115.34)ATIVK                                                            | 7  | 2 | 728  | 1 |
| IP100124725 | 91   | EVSFDVEIPKTAFTNFTIITDGVYTPGNVK   | 1        | 104.276 | 132.01 | 132.01 | _TAFITN(de)FTIITDGVYTPGNVK_                               | TAFITN(1)FTIITDGVYTPGNVK                                                        | TAFITN(104.28)FTIITDGVYTPGNVK                                                   | 6  | 2 | 1137 | 1 |
| IP100115762 | 478  | EGTTVIQDERFFPYANGTISIRD IQANDTGR | 1        | 84.1687 | 84.169 | 84.169 | _FFPYAN(de)GTISIRD_                                       | FFPYAN(1)GTISIRD                                                                | FFPYAN(84.17)GTISIRD                                                            | 6  | 2 | 694  | 1 |
| IP100378635 | 122  | KAPSFERGVYVETHNKTISIKTINAMQOMS   | 1        | 133.807 | 133.81 | 133.81 | _GVYVETHN(1)N(1)K_                                        | GVYVETHN(133.81)N(133.81)K                                                      | GVYVETHN(133.81)N(133.81)K                                                      | 9  | 2 | 589  | 1 |
| IP100125262 | 301  | FAKWAKHRIVFTHPNWTIS              | 1        | 91.5493 | 91.549 | 91.549 | _VFTHPN(de)WTIS_                                          | VFTHPN(1)WTIS                                                                   | VFTHPN(91.55)WTIS                                                               | 7  | 2 | 658  | 1 |
| IP100322542 | 196  | QGCVEWTHRYIRIGNETIQRSDDPPKAHVTH  | 1        | 111.455 | 111.46 | 111.46 | _IGN(de)ETIQR_                                            | IGN(1)ETIQR                                                                     | IGN(111.46)ETIQR                                                                | 3  | 2 | 466  | 1 |
| IP100322867 | 750  | ISSPSTDFQIEVTPQNTINPSSSGSMFSWR   | 0.975524 | 16.005  | 118.57 | 118.57 | _IGISSPSTDFQIEVTPQN(de)ITINPSSSGSMFSWR_                   | IGISSPSTDFQIEVTPQN(0.976)ITIN(1)IGISSPSTDFQIEVTPQN(16)ITIN(-                    | IGISSPSTDFQIEVTPQN(0.976)ITIN(1)IGISSPSTDFQIEVTPQN(16)ITIN(-                    | 18 | 4 | 901  | 1 |
| IP100471264 | 49   | DMQWNYAPGRNVLTNQTINNDTVASSFIKS   | 0.994565 | 23.1219 | 119.08 | 119.08 | _NQVIN(de)QTINN(de)DTVASSFIK_                             | NQVIN(0.995)QTIN(0.209)N(-23.12)VTIN(23.12)QTIN(-5.                             | NQVIN(0.995)QTIN(0.209)N(-23.12)VTIN(23.12)QTIN(-5.                             | 5  | 3 | 694  | 1 |
| IP100272690 | 700  | IEGSKIIEKSTEVSNTIKYTRAKTDFVS     | 1        | 107.026 | 107.03 | 107.03 | _STEVSN(de)HTIK_                                          | STEVSN(1)HTIK                                                                   | STEVSN(107.03)HTIK                                                              | 6  | 2 | 559  | 1 |
| IP100229935 | 28   | TISVQGTVAEQKCNFTIIESRVSSISASI    | 1        | 90.9131 | 90.913 | 90.913 | _CN(de)FTIIESR_                                           | CN(1)FTIIESR                                                                    | CN(90.91)FTIIESR                                                                | 2  | 2 | 571  | 1 |
| IP100400016 | 1173 | ANVSITQPESTGEPNMTIIAEARIAERH     | 0.501354 | 0       | 49.793 | 49.793 | _M(ox)AAAN(de)VSITQPESTGEPN(de)NM(ox)TIIAEAR_             | MAAAN(0.997)VSITQPESTGEPN(0.5)MAAAN(22.65)VSITQPESTGEPN(0)                      | MAAAN(0.997)VSITQPESTGEPN(0.5)MAAAN(22.65)VSITQPESTGEPN(0)                      | 19 | 3 | 994  | 1 |
| IP100471089 | 131  | CPEIPDKTISICDSDANCTIGSSDTHSSGIGT | 1        | 73.9806 | 73.981 | 73.981 | _TSCDSDAN(de)CTIGSSDTHSSGIGTGR_                           | TSICDSDAN(1)CTIGSSDTHSSGIGTGR                                                   | TSICDSDAN(73.98)CTIGSSDTHSSG                                                    | 9  | 3 | 886  | 1 |
| IP100124497 | 114  | NHKIQQEPGIIIGPGNSTIFIERVTEDEGV   | 1        | 91.4006 | 91.401 | 91.401 | _IQQEPGIIIGPGN(de)STIFIER_                                | IQQEPGIIIGPGN(1)STIFIER                                                         | IQQEPGIIIGPGN(91.4)STIFIER                                                      | 13 | 3 | 728  | 1 |
| IP100757771 | 228  | GEYHCYHFVSAPKANATIEVKAAPDITGHK   | 1        | 108.433 | 110.87 | 110.87 | _AN(de)ATIEVK_                                            | AN(1)ATIEVK                                                                     | AN(108.43)ATIEVK                                                                | 2  | 2 | 424  | 1 |
| IP100279010 | 314  | QQTQEEQINNVNKTGNITIERVHRNQSIGY   | 1        | 120.457 | 120.46 | 120.46 | _GN(de)ITIER_                                             | GN(1)ITIER                                                                      | GN(120.46)ITIER                                                                 | 2  | 2 | 402  | 1 |
| IP100808296 | 454  | NYIIESNITSDAHKGNSTIAVPRKRDADAPK  | 1        | 162.358 | 162.36 | 162.36 | _GN(de)STIAVPK_                                           | GN(1)STIAVPK                                                                    | GN(162.36)STIAVPK                                                               | 2  | 2 | 444  | 1 |
| IP100466999 | 256  | TSKGVITWIPNHSNGTIAAPVVPIDIDE     | 0.48249  | 0       | 78.978 | 78.978 | _VITWIPN(de)HISNGTIAAPVVPIDIDEDGVR_                       | VITWIPN(0.035)PN(0.482)HISN(0.4)VITWIPN(-11.39)PN(0)HISN(0)GT                   | VITWIPN(0.035)PN(0.482)HISN(0.4)VITWIPN(-11.39)PN(0)HISN(0)GT                   | 12 | 3 | 1109 | 1 |
| IP100118250 | 388  | DPISISPGTPPPINNSTRHQMSSPSTVKI    | 0.986506 | 18.5799 | 52.03  | 52.03  | _SNASDDPISISPGTPPPINN(de)N(de)STHR_                       | SN(0.027)ASDDPISISPGTPPPINN(0)SN(-18.58)ASDDPISISPGTPPPINN                      | SN(0.027)ASDDPISISPGTPPPINN(0)SN(-18.58)ASDDPISISPGTPPPINN                      | 21 | 3 | 864  | 1 |
| IP100127556 | 445  | ASIHWRREKIIIPAKNTHIHKSHVGRKMI    | 1        | 86.8981 | 86.898 | 86.898 | _IIPAKN(de)THHK_                                          | IIPAKN(1)THHK                                                                   | IIPAKN(86.9)THHK                                                                | 7  | 3 | 451  | 1 |
| IP100268030 | 132  | SWAQHESRTFAVYINSTGYRTAFPGKYINE   | 1        | 73.8478 | 73.848 | 73.848 | _TFAVYN(de)STGYR_                                         | TFAVYN(1)STGYR                                                                  | TFAVYN(73.85)STGYR                                                              | 7  | 2 | 697  | 1 |
| IP100119035 | 333  | CGGNIIGVRYIYHANQTGYDPPSSRYDAIC   | 1        | 70.9421 | 70.942 | 70.942 | _TVYIHAN(de)QTGYDPPSSR_                                   | TVYIHAN(1)QTGYDPPSSR                                                            | TVYIHAN(70.94)QTGYDPPSSR                                                        | 7  | 2 | 954  | 1 |
| IP100273133 | 104  | ARPYCKVILIAQTHANNTGSYHYCYKIKAR   | 0.946259 | 12.4571 | 66.022 | 66.022 | _VILIAQTHAN(de)NTGSYHYCYK_                                | VILIAQTHAN(0.946)N(0.054)TGSYVILIAQTHAN(12.46)N(-12.46)TG                       | VILIAQTHAN(0.946)N(0.054)TGSYVILIAQTHAN(12.46)N(-12.46)TG                       | 10 | 3 | 785  | 1 |
| IP100405543 | 196  | FIDPEGSQVDTIEGNITIASFPDFEIPSN    | 0.876322 | 8.57533 | 128.22 | 128.22 | _ETVITFIDPEGSQVDTIEGN(de)ITGIASFDFEIPSNPK_                | ETVITFIDPEGSQVDTIEGN(0.122)N(ETVITFIDPEGSQVDTIEGN(-8.58)N                       | ETVITFIDPEGSQVDTIEGN(0.122)N(ETVITFIDPEGSQVDTIEGN(-8.58)N                       | 21 | 4 | 1024 | 1 |
| IP100308971 | 1305 | ISQKIFPENGIIKMNVTGGDCHKYVQRST    | 1        | 80.5221 | 80.522 | 80.522 | _M(ox)N(de)YGGDCHK_                                       | MN(0.52)YGGDCHK                                                                 | MN(80.52)YGGDCHK                                                                | 2  | 2 | 651  | 1 |
| IP100223446 | 1361 | KKFYFGGSPISQYANFTGCSINAFYTRIDR   | 0.999792 | 36.8127 | 69.27  | 69.27  | _FYFGGSPISQYAN(de)FTGCSINAFYTR_                           | FYFGGSPISQYAN(1)FTGCSINAFYTR                                                    | FYFGGSPISQYAN(36.81)FTGCSIN                                                     | 14 | 3 | 989  | 1 |
| IP100122584 | 265  | KQIFAPRQEEFHQRANVTIISKFHWCCHH    | 1        | 110.387 | 110.39 | 110.39 | _AN(de)VTFTISK_                                           | AN(1)VTFTISK                                                                    | AN(110.39)VTFTISK                                                               | 2  | 2 | 491  | 1 |
| IP100420835 | 958  | GIDSKASVIRSRNWNSTIEEYSKINYIDI    | 1        | 110.306 | 110.31 | 110.31 | _IWN(de)STFIEEYSK_                                        | IWN(1)STFIEEYSK                                                                 | IWN(110.31)STFIEEYSK                                                            | 3  | 2 | 759  | 1 |
| IP100122493 | 69   | CPREVMQDFVRHYHNGTFEDGKFRDSSYDR   | 1        | 102.4   | 102.4  | 102.4  | _YHYN(de)GTFEDGKK_                                        | YHYN(1)GTFEDGKK                                                                 | YHYN(102.4)GTFEDGKK                                                             | 4  | 2 | 730  | 1 |
| IP100223446 | 780  | SAYNTAVDSARDAVRNIIEVVPQIIDQIRTV  | 1        | 112.667 | 112.67 | 112.67 | _DAVRN(de)ITEVVPQIIDQIR_                                  | DAVRN(1)ITEVVPQIIDQIR                                                           | DAVRN(112.67)ITEVVPQIIDQIR                                                      | 5  | 3 | 694  | 1 |
| IP100114844 | 83   | NINKMTSGDGETANATEVKKITQPKNI      | 1        | 78.95   | 115.73 | 115.73 | _TM(ox)TSGDGETAN(de)ATEVKK_                               | TMTSGDGETAN(1)ATEVKK                                                            | TMTSGDGETAN(78.95)ATEVKK                                                        | 12 | 2 | 927  | 1 |
| IP100120793 | 196  | ITIKQHTVTTTKGENFTEDVMMERVVEQ     | 1        | 73.4483 | 73.448 | 73.448 | _QHTVTTTKGEN(de)FTETDVK_                                  | QHTVTTTKGEN(1)FTETDVK                                                           | QHTVTTTKGEN(73.45)FTETDVK                                                       | 12 | 2 | 1070 | 1 |
| IP100223987 | 682  | EYRSVSIIDKKSVDVINITEQVQVWVYNSMT  | 1        | 159.128 | 159.13 | 159.13 | _SDVIN(de)ITEQVQVWV_                                      | SDVIN(1)ITEQVQVWV                                                               | SDVIN(159.13)ITEQVQVWV                                                          | 5  | 2 | 830  | 1 |
| IP100756745 | 2644 | GIFTYQIDEDRRHMQNIIEEQIEVKKIFVYI  | 1        | 123.758 | 123.76 | 123.76 | _HM(ox)QN(de)ITEEQIEVKK_                                  | HMQN(1)ITEEQIEVKK                                                               | HMQN(123.76)ITEEQIEVKK                                                          | 4  | 2 | 857  | 1 |
| IP100808422 | 167  | CSGYVQIEVCRGSPANVTEARISFYSHSGSF  | 1        | 94.4653 | 94.465 | 94.465 | _GSPAN(de)VTEAR_                                          | GSPAN(1)VTEAR                                                                   | GSPAN(94.47)VTEAR                                                               | 5  | 2 | 502  | 1 |
| IP100153202 | 546  | QAAKNGSHKCDISNSSTEAGQKIIKMSIG    | 1        | 83.2035 | 83.204 | 83.204 | _CDISN(de)STEAGQK_                                        | CDISN(1)STEAGQK                                                                 | CDISN(83.2)STEAGQK                                                              | 5  | 2 | 656  | 1 |
| IP100132927 | 53   | EIKATGTAHFFNFINTDYRITIKDDEHDR    | 0.997283 | 25.6476 | 119.4  | 119.4  | _ATGTAHFFNFIN(de)TTDYR_                                   | ATGTAHFFN(0.003)FIIN(0.997)TTIATGTAHFFN(-25.65)FIIN(25.65)                      | ATGTAHFFN(0.003)FIIN(0.997)TTIATGTAHFFN(-25.65)FIIN(25.65)                      | 13 | 3 | 697  | 1 |
| IP100130627 | 93   | SEENFTPGVILNRPNGTDVYKVIDYTGTE    | 0.930819 | 11.437  | 59.426 | 59.426 | _N(de)GIPDEQILVM(ox)M(ox)YDDIANSEENFTPGVILNRPN(de)GTDVYK_ | N(0.993)GIPDEQILVM(ox)M(ox)YDDIANSEENFTPGVILNRPN(0)CN(25.04)GIPDEQILVMYDDIAN(-2 | N(0.993)GIPDEQILVM(ox)M(ox)YDDIANSEENFTPGVILNRPN(0)CN(25.04)GIPDEQILVMYDDIAN(-2 | 33 | 4 | 1089 | 1 |
| IP100312058 | 481  | HIKDAQIFIQKKAVKNFVDVHPDYGARQIAI  | 1        | 57.1063 | 79.492 | 79.492 | _N(de)FTDVHPDYGAR_                                        | N(57.11)FTDVHPDYGAR                                                             | N(57.11)FTDVHPDYGAR                                                             | 1  | 2 | 697  | 1 |
| IP100319200 | 39   | RQPTFVVPKDKITSNITDQIAEAYIYRV     | 1        | 177.555 | 177.56 | 177.56 | _TSN(de)ITDQIAEAYIYR_                                     | TSN(1)ITDQIAEAYIYR                                                              | TSN(177.56)ITDQIAEAYIYR                                                         | 3  | 2 | 930  | 1 |
| IP100120225 | 765  | TMSRSRNTVADYINIIEEPEFETEYPPFE    | 1        | 81.9736 | 81.974 | 81.974 | _SRN(de)ITVADYIN(de)ITDPEEFETEYPPFESR_                    | SRN(1)ITVADYIN(1)ITDPEEFETEYPPFESR(81.97)ITVADYIN(81.97)ITD                     | SRN(1)ITVADYIN(1)ITDPEEFETEYPPFESR(81.97)ITVADYIN(81.97)ITD                     | 11 | 3 | 1121 | 1 |
| IP100315576 | 372  | VWQPGSGYSSITAIENSTGDKGPPQIFVYI   | 1        | 148.286 | 148.29 | 148.29 | _VWQPGSGYSSITAIEN(de)STDGK_                               | VQWPGSGYSSITAIEN(1)STDGK                                                        | VQWPGSGYSSITAIEN(148.29)ST                                                      | 18 | 2 | 1198 | 1 |
| IP100221669 | 653  | WHWPINQGRFSGANDTDFRVYIIGNPVVW    | 1        | 91.9612 | 132.32 | 132.32 | _FSGAN(de)TDFRV_                                          | FSGAN(1)TDFRV                                                                   | FSGAN(91.96)TDFRV                                                               | 5  | 2 | 566  | 1 |
| IP100128336 | 259  | KHIRAVGDEFERSQHINSTDAADKMAPEDWT  | 1        | 66.0043 | 95.651 | 95.651 | _SQHIN(de)STDAADK_                                        | SQHIN(1)STDAADK                                                                 | SQHIN(66)STDAADK                                                                | 5  | 2 | 644  | 1 |
| IP100222321 | 136  | TCVDQIKPQRNFVINMTRCFQWIPETDYE    | 1        | 72.9817 | 92.538 | 92.538 | _NFVIN(de)M(ox)TCR_                                       | NFVIN(1)MTCR                                                                    | N(-72.98)NFVIN(72.98)MTCR                                                       | 5  | 2 | 586  | 1 |
| IP100121254 | 210  | IKQPEVSNVTRNTAFNITCQAVGPPPEVINI  | 0.957167 | 13.5226 | 137.52 | 137.52 | _NTAFN(de)ITCQAVGPPPEVINIFWQVQ(de)SSR_                    | N(0.043)TAFN(0.957)ITCQAVGPPPEVIN(-13.52)TAFN(13.52)ITCQAVG                     | N(0.043)TAFN(0.957)ITCQAVGPPPEVIN(-13.52)TAFN(13.52)ITCQAVG                     | 5  | 3 | 1017 | 1 |
| IP100129158 | 168  | EVSGPADRGIPDQKVNFTCKSHGFSRNIIT   | 1        | 88.0206 | 93.011 | 93.011 | _GIPDQKVN(de)FTCK_                                        | GIPDQKVN(1)FTCK                                                                 | GIPDQKVN(88.02)FTCK                                                             | 8  | 2 | 704  | 1 |
| IP100126316 | 242  | WTQDRMWRKNRSRQNSTCIGTDINRNF      |          |         |        |        |                                                           |                                                                                 |                                                                                 |    |   |      |   |



Table S5. Identified deglycosylated glycopeptides

## PNP Strategy 1

## De-glycopeptides Sequence

| De-glycopeptides Sequence                 | Mass      | Proteins    | Leading r:  | Unique (C | Unique (F | Charges | PEP          | Score  |
|-------------------------------------------|-----------|-------------|-------------|-----------|-----------|---------|--------------|--------|
| YYQSIYDTAENIN(deVTYPEWQSPEEDINFVTDATAK    | 4042.8273 | IPI00118674 | IPI00118674 | yes       | yes       |         | 4 0.0059081  | 46.415 |
| YYN(deYTISINGK                            | 1334.6507 | IPI0022142E | IPI0022142E | yes       | yes       |         | 2 3.5626E-34 | 199.82 |
| YYN(deQSAGGSHTIQWMAGCDVESDGR              | 2788.1606 | IPI0098582E | IPI0098582E | yes       | no        | 2,3,4   | 8.9548E-80   | 214.14 |
| YYN(deFSVFQIDAPSFAYIK                     | 2172.0568 | IPI00377727 | IPI00377727 | yes       | no        | 2,3     | 2.9196E-06   | 123.02 |
| YYHGEISYIN(deVTRK                         | 1741.8788 | IPI00404551 | IPI00404551 | yes       | no        | 2,3,4   | 1.8766E-32   | 194.59 |
| YYHGEISYIN(deVTR                          | 1613.7838 | IPI00404551 | IPI00404551 | yes       | no        | 2,3     | 3.7582E-43   | 203.7  |
| YWGN(deITVVMGEHDFSEKDGDEQVR               | 2810.2606 | IPI0030789C | IPI0030789C | yes       | yes       |         | 3 0.014194   | 60.602 |
| YWGIIHQAFVQN(deGTVSK                      | 1947.0003 | IPI00222967 | IPI00222967 | yes       | no        |         | 3 0.0035835  | 75.316 |
| YVYVADIIAHEIHVIEKQPNMN(deITQIK            | 3178.6849 | IPI00310567 | IPI00310567 | yes       | yes       | 3,4     | 7.9393E-22   | 124.69 |
| YVVVSTPEKSQITISNIDVN(deVDPGTYVCNATNAQGTTR | 4111.0168 | IPI0040849E | IPI0040849E | yes       | no        |         | 4 1.5572E-14 | 89.99  |
| YVMIPVADQDKCVVHYEN(deSTVPEKK              | 2948.4412 | IPI0040914E | IPI0040914E | yes       | yes       | 3,4     | 3.5201E-24   | 146.15 |
| YTSFEYPKNISFACNPGFFIN(deGTSSSK            | 3062.412  | IPI0032246E | IPI0032246E | yes       | no        | 2,3,4   | 1.587E-88    | 211.64 |
| YTSFEYPKN(deISFACNPGFFINGTSSSK            | 3062.412  | IPI0032246E | IPI0032246E | yes       | no        | 2,3,4   | 1.587E-88    | 211.64 |
| YTSDPN(deVTSVGPSPK                        | 1450.694  | IPI0022999E | IPI0022999E | yes       | yes       |         | 2 0.0018208  | 106.42 |
| YTGN(deASAIIPDQGR                         | 1687.8893 | IPI0013183C | IPI0013183C | yes       | no        | 2,3     | 1.6755E-59   | 185.27 |
| YTGN(deASAIIPDQGR                         | 1721.8737 | IPI0013563E | IPI0013563E | yes       | no        | 2,3     | 5.6048E-05   | 133.48 |
| YSVQHMYFTYN(deISDTEHFPNAISK               | 2891.3225 | IPI0046921E | IPI0046921E | yes       | yes       | 2,3,4   | 2.4947E-34   | 170.14 |
| YSQAAN(deSTKEIDDCEQANK                    | 2170.9437 | IPI0018735E | IPI0018735E | yes       | yes       |         | 2 5.2847E-32 | 184.83 |
| YSNESQDISVNGYN(deCTTSSVSSAIR              | 2738.209  | IPI00322304 | IPI00322304 | yes       | yes       |         | 3 2.8527E-14 | 120.33 |
| YSN(deESQDISVNGYNCTTSSVSSAIR              | 2738.209  | IPI00322304 | IPI00322304 | yes       | yes       |         | 3 2.8527E-14 | 120.33 |
| YSIYKDPAGWISINPIN(deGTVDTTAVIDR           | 3078.5662 | IPI0012374E | IPI0012374E | yes       | yes       |         | 3 1.0281E-25 | 133.15 |
| YRAEFAVAN(deDTGFVDIPQKEK                  | 2397.1601 | IPI00128154 | IPI00128154 | yes       | no        | 2,3     | 2.9192E-15   | 140.28 |
| YQTVDSNIDGFVN(deCTK                       | 1946.868  | IPI00468814 | IPI00468814 | yes       | yes       | 2,3     | 1.7955E-14   | 161.35 |
| YQTINC(deSVNVR                            | 1352.6507 | IPI0042083E | IPI0042083E | yes       | no        |         | 2 0.019282   | 69.815 |
| YQMDN(deVSSIVQIIGSHIEDVNADIIQTK           | 3129.5652 | IPI00330594 | IPI00330594 | yes       | yes       | 3,4     | 7.4347E-49   | 176.9  |
| YQHVGQVIFQAPEAGGRWN(deQTQK                | 2754.399  | IPI0089497E | IPI0089497E | yes       | no        |         | 4 7.8116E-07 | 93.684 |
| YQFNTNVVFSND(deGTIVDRYR                   | 2407.1557 | IPI0032137E | IPI0032137E | yes       | no        |         | 3 0.026005   | 63.337 |
| YQFNTNVVFSND(deGTIVDR                     | 2087.9912 | IPI0032137E | IPI0032137E | yes       | no        |         | 3 1.6886E-11 | 135.09 |
| YQFEVICPAPRPGAASN(deISFQAPFR              | 2822.3963 | IPI0031115E | IPI0031115E | yes       | yes       |         | 3 1.9596E-05 | 84.975 |
| YQEIIIESSIN(deKTQWK                       | 2108.079  | IPI0099093E | IPI0099093E | yes       | no        |         | 2 4.1899E-14 | 162.77 |
| YQEGDITIYVINIHN(deVTK                     | 2119.095  | IPI0017009E | IPI0017009E | yes       | no        | 2,3     | 5.5086E-11   | 153.36 |
| YPTPGEAPGVVGNFN(deK                       | 1645.81   | IPI00112614 | IPI00112614 | yes       | yes       |         | 3 0.012355   | 117.07 |
| YPQDYQFYIQN(deFTAIPINTVPPQR               | 3011.5181 | IPI0011085E | IPI0011085E | yes       | no        | 2,3,4,5 | 1.5762E-25   | 149.44 |
| YPNN(deGSIVWGK                            | 1233.6142 | IPI0084869E | IPI0084869E | yes       | yes       |         | 2 0.0062013  | 83.081 |
| YPHKPEIN(deSTTHPGADIKENFCR                | 2710.2922 | IPI0011420E | IPI0011420E | yes       | yes       |         | 3 6.5881E-09 | 114.55 |
| YPHKPEIN(deSTTHPGADIK                     | 2004.0065 | IPI0011420E | IPI0011420E | yes       | yes       | 2,3     | 1.3155E-14   | 163.8  |
| YN(deHTGQVVIYK                            | 1320.6826 | IPI00466371 | IPI01026704 | no        | no        | 2,3     | 2.6863E-11   | 167.2  |
| YMN(deYTSIITFHCK                          | 1676.7691 | IPI00308971 | IPI00308971 | yes       | yes       |         | 3 0.0025961  | 127.56 |
| YMGPIPEDNIDHYRN(deSTVMSR                  | 2607.221  | IPI0012581E | IPI0012581E | yes       | no        | 2,3     | 3.4764E-08   | 106.16 |
| YMDQNSDQWQDGVGYIN(deSSEGAVGR              | 2704.146  | IPI0011423E | IPI0011423E | yes       | no        |         | 3 8.2446E-08 | 97.509 |
| YMAIAN(deR                                | 950.50077 | IPI00123814 | IPI00123814 | yes       | yes       |         | 2 0.010808   | 110.63 |
| YKYETTISPTSNISSNSFICIEN(deR               | 2823.3385 | IPI0062583E | IPI0062583E | yes       | no        | 3,4     | 8.5795E-80   | 184.68 |
| YKYETTISPTS(deISSNSFICIENR                | 2823.3385 | IPI0062583E | IPI0062583E | yes       | no        | 3,4     | 8.5795E-80   | 184.68 |
| YKGTAGNAIMDGASQIVGEN(deR                  | 2151.0379 | IPI0027907E | IPI0027907E | yes       | yes       | 2,3     | 9.2831E-59   | 207.43 |
| YKGN(deASAIIPDQGR                         | 1748.921  | IPI0012807E | IPI0012807E | yes       | yes       | 2,3     | 0.0001963    | 131.18 |
| YKGIN(deITEDTYKPR                         | 1696.8784 | IPI0011980E | IPI0011980E | yes       | yes       | 2,3,4   | 0.014851     | 100.38 |
| YIYIASN(deHSNK                            | 1308.6463 | IPI0011817E | IPI0011817E | yes       | no        | 2,3     | 0.0038245    | 91.313 |
| YITMGGKN(deFTR                            | 1286.6441 | IPI00848991 | IPI00848991 | yes       | no        |         | 2 0.0093052  | 92.866 |
| YIQVVYIHNNN(deISAVGQNDFCR                 | 2623.2602 | IPI0012319E | IPI0012319E | yes       | yes       |         | 3 2.2358E-25 | 163.79 |
| YIQPIAVQFTN(deITVDTEIRVECK                | 2849.4997 | IPI0012155C | IPI0012155C | yes       | yes       |         | 3 0.0024792  | 70.452 |
| YIQPIAVQFTN(deITVDTEIR                    | 2333.2631 | IPI0012155C | IPI0012155C | yes       | yes       | 2,3     | 4.4772E-20   | 288.25 |
| YINSFPHEN(deSTAFYGVNQFSYIFPEEFK           | 3374.556  | IPI00453524 | IPI00453524 | yes       | yes       |         | 3 1.0847E-42 | 163.74 |
| YIN(deFSTSEKEK                            | 1344.6561 | IPI0013501C | IPI0013501C | yes       | no        |         | 2 0.0070005  | 97.214 |
| YIN(deETQKITQKIK                          | 1605.8726 | IPI0012322E | IPI0012322E | yes       | yes       |         | 2 0.0078744  | 110.51 |
| YIN(deETQKITQK                            | 1364.6936 | IPI0012322E | IPI0012322E | yes       | yes       | 2,3     | 6.3784E-11   | 162.68 |
| YIMWGISSDIWGEKPN(deTSYIIGK                | 2657.32   | IPI00323624 | IPI00323624 | yes       | no        |         | 3 0.0001424  | 88.565 |
| YIKNGN(deATIIR                            | 1261.7143 | IPI0098582E | IPI0010999E | no        | no        | 2,3     | 8.699E-16    | 170.89 |
| YIKNGN(deATIIR                            | 1261.7143 | IPI0098582E | IPI0010999E | no        | no        | 2,3     | 8.699E-16    | 170.89 |
| YIHEN(deYTK                               | 1066.5084 | IPI00127407 | IPI00127407 | yes       | no        |         | 2 0.0127     | 104.2  |
| YIEIGN(deETIIR                            | 1319.7085 | IPI00850057 | IPI00850057 | yes       | no        |         | 2 2.3485E-13 | 160.22 |
| YHYN(deGTIIDGTIFDSSYSR                    | 2208.0124 | IPI0013048E | IPI0013048E | yes       | yes       | 2,3     | 5.3619E-08   | 123.19 |
| YHYN(deGTIIDGTAFDSSYSR                    | 2192.9763 | IPI0012249E | IPI0012249E | yes       | no        | 2,3     | 7.1162E-11   | 139.11 |
| YHYN(deGTIFDGTIFDSSSHNR                   | 2243.0032 | IPI0013048E | IPI0013048E | yes       | yes       | 2,3     | 5.4453E-11E  | 248.97 |
| YHYN(deGTFEDGKK                           | 1457.6575 | IPI0012249E | IPI0012249E | yes       | no        |         | 2 0.0044575  | 102.4  |
| YHYN(deGTFEDGK                            | 1329.5626 | IPI0012249E | IPI0012249E | yes       | no        |         | 2 0.040739   | 60.255 |
| YHYN(deASIIDGTIIDSTWNIGK                  | 2380.1699 | IPI0013048E | IPI0013048E | yes       | yes       | 2,3     | 0.0097125    | 61.276 |
| YHHYSSN(deFSIPK                           | 1478.6943 | IPI0012948E | IPI0012948E | yes       | no        | 2,3     | 9.3441E-24   | 187.85 |
| YHGFIN(deTSYHR                            | 1393.6527 | IPI0015405E | IPI0015405E | yes       | no        |         | 3 0.0027716  | 96.113 |
| YHDYYITSTSN(deGSIEGIENR                   | 2318.0451 | IPI00130754 | IPI00130754 | yes       | yes       |         | 3 0.0013354  | 81.157 |
| YGTAIVHIYVNETIAN(deR                      | 1933.0058 | IPI00719927 | IPI00719927 | yes       | no        | 2,3     | 0.0001309    | 112.8  |
| YGTAIVHIYV(deETIANR                       | 1933.0058 | IPI00719927 | IPI00719927 | yes       | no        | 2,3     | 0.0001309    | 112.8  |
| YGQEQGTAPFQVSN(deHTGR                     | 1975.9137 | IPI0040939E | IPI0040939E | yes       | yes       | 2,3     | 2.4576E-05   | 117.3  |
| YGMQNSGNEAAWN(deYTIEQYQK                  | 2494.0859 | IPI0013458E | IPI0013458E | yes       | yes       | 2,3     | 1.5762E-20   | 202.16 |
| YGKN(deDSITITQIK                          | 1479.7933 | IPI0012342E | IPI0012342E | yes       | no        | 2,3     | 1.4066E-42   | 201.48 |
| YGIVVIDECPGVGIVIPQSFGN(deESIR             | 2817.4371 | IPI0030923C | IPI0030923C | yes       | no        | 2,3     | 5.3732E-26   | 149.41 |
| YGHPNGTQGN(deSTMWPVFTSTEQK                | 2566.1547 | IPI0013116E | IPI0013116E | yes       | yes       |         | 3 1.2955E-08 | 108.18 |
| YGHPN(deGTQGNSTMWPVFTSTEQK                | 2566.1547 | IPI0013116E | IPI0013116E | yes       | yes       |         | 3 1.2955E-08 | 108.18 |
| YFTNRI(deDVSQNVSSDTDQSCESTK               | 2780.2195 | IPI0012076E | IPI0012076E | yes       | no        |         | 3 0.0064041  | 65.855 |
| YFFIQSVSDSDGRN(deFTSSPPGQTQFK             | 2852.3406 | IPI0034468E | IPI0034468E | yes       | yes       |         | 3 3.5902E-33 | 167.51 |
| YEVNWNQSTIDCVDPISIAAN(deR                 | 2652.2126 | IPI0011945E | IPI0033103E | no        | no        | 2,3     | 1.5848E-18   | 142.23 |
| YEVNWN(deQSTIDCVDPISIAANR                 | 2652.2126 | IPI0011945E | IPI0033103E | no        | no        | 2,3     | 1.5848E-18   | 142.23 |
| YEIQQN(deETR                              | 1179.552  | IPI0015405E | IPI0015405E | yes       | no        |         | 2 0.0065213  | 106.29 |
| YEQAQN(deISQDIEK                          | 1564.7733 | IPI0040001E | IPI0040001E | yes       | no        |         | 2 0.0070182  | 131.96 |

|                                            |           |             |             |     |     |       |             |        |
|--------------------------------------------|-----------|-------------|-------------|-----|-----|-------|-------------|--------|
| YDVN(deRSDSGGSIQIEEGYFVHHFAPENIPTMSK       | 3723.7264 | IPI00312711 | IPI00312711 | yes | no  | 3,4   | 8.653E-54   | 162.47 |
| YDNHSSSVIAAVVFEHSFN(deHSQDPIPIAVK          | 3307.6262 | IPI00153807 | IPI00153807 | yes | no  | 4     | 0.0001822   | 61.612 |
| YDN(deHSSSVIAAVVFEHSFNHSQDPIPIAVK          | 3307.6262 | IPI00153807 | IPI00153807 | yes | no  | 4     | 0.0001822   | 61.612 |
| YDKSEVDGAAAMIN(deYTHIIMEAVPGHPAIYR         | 3431.6642 | IPI0087485E | IPI0087485E | yes | no  | 4,5   | 1.3635E-17  | 110.94 |
| YDIPASINYIIN(deK                           | 1522.8031 | IPI0012926E | IPI0012926E | yes | yes | 2,3   | 2.2592E-23  | 186.46 |
| YDIIINENGIISN(deVSEPARTAR                  | 2514.333  | IPI0022993E | IPI0022993E | yes | yes | 3     | 3.098E-06   | 96.379 |
| YAVYWN(deSSNPR                             | 1355.6258 | IPI00114364 | IPI00114364 | yes | no  | 2     | 0.0021036   | 99.215 |
| YATENDISSIHNSTITCIVN(deQTTTSITGTSPEIMEK    | 3854.819  | IPI0023031E | IPI0023031E | yes | no  | 3,4,5 | 2.7171E-26  | 115.47 |
| YATENDISSIHN(deSTITCIVNQTTTSITGTSPEIMEK    | 3854.819  | IPI0023031E | IPI0023031E | yes | no  | 3,4,5 | 2.7171E-26  | 115.47 |
| YAFQEIIIGDISFIPTIN(deFSKYIR                | 2847.5211 | IPI00122557 | IPI00122557 | yes | no  | 3     | 0.0026787   | 100.28 |
| YAFQEIIIGDISFIPTIN(deFSK                   | 2415.2726 | IPI00122557 | IPI00122557 | yes | no  | 2,3   | 1.0722E-58  | 202.16 |
| WVITAAHCIIYPPWDKN(deFTENDIIVR              | 3170.6012 | IPI0011420E | IPI0011420E | yes | yes | 3,4   | 2.0936E-05  | 81.665 |
| WVGN(deWTYEIK                              | 1294.6346 | IPI0015314E | IPI0015314E | yes | yes | 2     | 0.0042009   | 98.898 |
| WVDGASIN(deFSHWNSGEPNDSR                   | 2374.0363 | IPI0022335E | IPI0022335E | yes | yes | 3     | 0.0006262   | 82.865 |
| WTGHN(deVTVVQR                             | 1295.6735 | IPI0011906E | IPI0011906E | yes | yes | 2,3   | 0.0038245   | 91.313 |
| WTDNTEYN(deNTIPIRGEER                      | 2207.0243 | IPI0027643C | IPI0027643C | yes | yes | 2,3   | 0.0001353   | 112.82 |
| WSFSN(deGTSWQK                             | 1326.5993 | IPI0031557E | IPI0031557E | yes | yes | 2     | 0.0014542   | 103.43 |
| WKPPSDPNGN(deITHYIVYWER                    | 2471.2022 | IPI0012835E | IPI0012835E | yes | no  | 3     | 1.7778E-05  | 107.72 |
| WIIVGAPTASWISN(deASVVNPGAIYR               | 2641.4017 | IPI00121334 | IPI00121334 | yes | no  | 3     | 0.0010075   | 69.259 |
| WGHN(deVTEFQQR                             | 1400.6585 | IPI0075438E | IPI0075438E | yes | yes | 2,3   | 0.0046836   | 88.338 |
| WGEVDIIGN(deCSQFYPRDYEEK                   | 2638.1798 | IPI0032067E | IPI0032067E | yes | yes | 3     | 0.02272     | 62.203 |
| WGEVDIIGN(deCSQFYPR                        | 2054.9156 | IPI0032067E | IPI0032067E | yes | yes | 2     | 1.2822E-10  | 154.49 |
| WFHN(deESIIPHQDANYVIQSAR                   | 2524.2248 | IPI0016287C | IPI0016287C | yes | yes | 3     | 0.0023516   | 72.421 |
| WECKN(deDTIFGIK                            | 1509.7286 | IPI0012618E | IPI0012618E | yes | yes | 2     | 0.0031429   | 124.12 |
| WDPEPN(deCTSK                              | 1232.5132 | IPI0013001C | IPI0013001C | yes | no  | 2     | 0.045548    | 62.408 |
| WASVVVPIGKEQN(deYTCR                       | 2006.0044 | IPI0010999E | IPI0010999E | yes | no  | 2,3   | 6.2904E-08  | 145.1  |
| WAAVVVPIGKEQN(deYTCHVHHK                   | 2472.2485 | IPI00850057 | IPI00850057 | yes | no  | 3     | 0.0020874   | 81.428 |
| VYVYAVN(deQTR                              | 1211.6299 | IPI00466371 | IPI01026704 | no  | no  | 2     | 0.0061629   | 94.692 |
| VYTYADTPNDFQISN(deFSIPEEDTKIKIPIIHHQAIK    | 4048.0833 | IPI00108811 | IPI00108811 | yes | yes | 4     | 2.9129E-07  | 71.927 |
| VYTYADTPNDFQISN(deFSIPEEDTKIK              | 3034.4448 | IPI00108811 | IPI00108811 | yes | yes | 3,4   | 1.7971E-46  | 180.63 |
| VYTYADTPNDFQISN(deFSIPEEDTK                | 2793.2657 | IPI00108811 | IPI00108811 | yes | yes | 2,3   | 4.8428E-29  | 157.01 |
| VYTVSSSPSCYMYVYVN(deTTEVAIEQDIAYIQEIK      | 3962.8846 | IPI0013601E | IPI0013601E | yes | yes | 4     | 1.3754E-11E | 215.08 |
| VYSIPGREN(deYSSVDANGIQSQMISR               | 2770.3344 | IPI0012710C | IPI0012710C | yes | yes | 3     | 8.1416E-25  | 149.85 |
| VYN(deGSVPFEER                             | 1295.6146 | IPI00265291 | IPI00265291 | yes | no  | 2     | 0.0029912   | 95.094 |
| VYMKN(deVTVVIR                             | 1320.7588 | IPI0046921E | IPI0046921E | yes | yes | 2,3   | 5.2957E-05  | 147.91 |
| VYIN(deDSVEISR                             | 1778.8799 | IPI0012676E | IPI0012676E | yes | yes | 2     | 0.000132    | 139.6  |
| VYIN(deDSVEISR                             | 1293.6565 | IPI0012676E | IPI0012676E | yes | yes | 2     | 0.022243    | 68.355 |
| VYIHPFHIIYHN(deK                           | 1679.8936 | IPI0065406E | IPI0065406E | yes | yes | 2,3   | 0.0027206   | 112.13 |
| VYGGIVN(deQSEINEGTAFRR                     | 2100.0276 | IPI0041628E | IPI0041628E | yes | yes | 2,3   | 4.0052E-65  | 211.09 |
| VYEEVINV(deTPNDGFAK                        | 1793.8836 | IPI0062489E | IPI0062489E | yes | no  | 2     | 0.0029413   | 80.545 |
| VWVCDRDNDVDSDEPAN(deCTQMTCGVDEFR           | 3706.4487 | IPI0011906E | IPI0011906E | yes | yes | 3,4   | 7.4716E-30  | 127.53 |
| VWVCDRDNDVDSDEPAN(deDCVDSDEPANCTQMTCGVDEFR | 3706.4487 | IPI0011906E | IPI0011906E | yes | yes | 3,4   | 7.4716E-30  | 127.53 |
| VWPDYPN(deITVDPSIGWDHQVEQYR                | 2913.3722 | IPI0084869E | IPI0084869E | yes | yes | 3,4   | 1.3107E-24  | 144.27 |
| VWPDGVIPFVIGGN(deFTGSQR                    | 2145.1007 | IPI0012518E | IPI0012518E | yes | no  | 2,3   | 6.6588E-13  | 143.83 |
| VWN(deQTEQEPAAYHIISICFVR                   | 2560.2533 | IPI0012907E | IPI0012907E | yes | no  | 3     | 4.9123E-23  | 160.55 |
| VWDTAAAIN(deR                              | 1115.5724 | IPI0022656E | IPI0022656E | yes | no  | 2     | 0.0079796   | 90.827 |
| VVTPEEYFN(deVTIQ                           | 1537.7664 | IPI0013310E | IPI0013310E | yes | no  | 2,3   | 3.2488E-10  | 162.32 |
| VVSVDISFRPIN(deETFPVVIETPKR                | 2904.5749 | IPI0062466E | IPI0062466E | yes | yes | 3,4,5 | 8.5805E-18E | 187.59 |
| VVSVDISFRPIN(deETFPVVIETPK                 | 2748.4738 | IPI0062466E | IPI0062466E | yes | yes | 2,3,4 | 2.2613E-16E | 264.92 |
| VVRPDSEIGERPPEDN(deQSFQYDHEAFIGK           | 3358.5854 | IPI00137831 | IPI00137831 | yes | yes | 3,4   | 2.2061E-06  | 88.79  |
| VVPEPNIVIN(deFSATAIR                       | 1839.0254 | IPI0065418E | IPI0065418E | yes | no  | 3     | 1.76E-06    | 130.27 |
| VVN(deVSEIYGTPTCK                          | 1565.7759 | IPI0062695C | IPI0062695C | yes | no  | 2,3   | 4.6365E-10E | 240.2  |
| VVN(deSTTGTGEHIR                           | 1369.695  | IPI0013122E | IPI0013122E | yes | no  | 3     | 0.0029448   | 109.84 |
| VVMDIPYEIWN(deETSAEVADIKK                  | 2549.2723 | IPI0011903E | IPI0011903E | yes | no  | 2,3,4 | 1.1415E-12  | 130.89 |
| VVMDIPYEIWN(deETSAEVADIK                   | 2421.1774 | IPI0011903E | IPI0011903E | yes | no  | 2,3   | 9.1308E-15  | 135.38 |
| VVIRPFYITN(deSTDMV                         | 1753.9073 | IPI0011980E | IPI0011980E | yes | no  | 2     | 6.184E-46   | 209.79 |
| VVINFN(deGTSQEIMAVSEHR                     | 2130.0528 | IPI0011118E | IPI0011118E | yes | yes | 3     | 3.9836E-06  | 114.59 |
| VVIISGVEPRPPTPQVQFTIN(deASSEDHKKR          | 3200.6942 | IPI0012297E | IPI0012297E | yes | no  | 4,5   | 0.0008354   | 70.994 |
| VVIHPN(deHSVVDIGIIK                        | 1739.0094 | IPI0040914E | IPI0040914E | yes | yes | 2,3,4 | 1.0873E-14E | 259.96 |
| VVIGEN(deITSNCPEVIYEIKEETPVFYK             | 3169.5893 | IPI0067425E | IPI0067425E | yes | yes | 3     | 9.675E-22   | 123.53 |
| VVIAGSN(deMTICCMSPTK                       | 1867.8664 | IPI0011929E | IPI0011929E | yes | no  | 2,3   | 4.2273E-06  | 124.78 |
| VVFISPAVPEEPEAYN(deITVIIR                  | 2455.3363 | IPI0040574E | IPI0040574E | yes | no  | 2,3,4 | 4.4966E-31  | 171.98 |
| VVDKGN(deGSKPTSPEEVK                       | 1769.9159 | IPI0033063E | IPI0033063E | yes | no  | 2,3   | 0.0006528   | 114.63 |
| VVAVSPAN(deSREER                           | 1525.8213 | IPI0022999E | IPI0022999E | yes | yes | 3     | 0.017981    | 75.739 |
| VVAVSPAN(deSR                              | 1111.635  | IPI0022999E | IPI0022999E | yes | yes | 2     | 0.001462    | 103.34 |
| VTTCHIPQQN(deATIYK                         | 1772.888  | IPI00410951 | IPI00410951 | yes | no  | 2,3   | 0.0005311   | 108.63 |
| VTPVCN(deASIPAQR                           | 1411.7242 | IPI00762091 | IPI00762091 | yes | no  | 2,3   | 0.0035524   | 96.745 |
| VTNSNANAAGPIIVAGYN(deVSGSVR                | 2330.1979 | IPI0022242E | IPI0022242E | yes | yes | 2,3   | 1.6259E-40  | 145.61 |
| VTN(deSSEFMMNK                             | 1286.5635 | IPI0031413E | IPI0031413E | yes | no  | 2     | 0.0024139   | 91.914 |
| VTIWWHPFVNYN(deSSSFGEGER                   | 2523.2183 | IPI0046425E | IPI0046425E | yes | yes | 3     | 1.9257E-09  | 116.73 |
| VTINNWWAN(deKTEGR                          | 1600.8322 | IPI0013664E | IPI0013664E | yes | yes | 2,3   | 4.6385E-32  | 190.41 |
| VTINNWWAN(deK                              | 1157.6193 | IPI0013664E | IPI0013664E | yes | yes | 2     | 0.000416    | 123.51 |
| VTIDFN(deITNPENGPVIDDAIPNSVHGHIPFAK        | 3440.7365 | IPI00466371 | IPI00466371 | yes | yes | 3     | 1.0381E-10  | 93.166 |
| VTIDFN(deITDPENGPVIDDAIPNSVHGHIPFAK        | 3441.7205 | IPI01026704 | IPI01026704 | yes | yes | 3,4,5 | 3.1894E-54  | 167.72 |
| VTAEVTTHTGTN(deTSTPTTR                     | 1872.9177 | IPI0047109C | IPI0047109C | yes | yes | 2     | 0.0005141   | 93.495 |
| VSTVTIVSATSTTAN(deMTMSPEGR                 | 2340.1301 | IPI0040660E | IPI0040660E | yes | yes | 3     | 0.0001531   | 80.752 |
| VSTIYANN(deGSVIQGSTVASVYHKR                | 2550.319  | IPI00121114 | IPI00121114 | yes | yes | 3,4   | 1.4458E-05  | 87.156 |
| VSTIYANN(deGSVIQGSTVASVYHK                 | 2394.2179 | IPI00121114 | IPI00121114 | yes | yes | 2,3,4 | 7.5507E-23E | 295.69 |
| VSQVIHEGGHN(deVTKIYESANIPDFRK              | 3050.5938 | IPI00463764 | IPI00463764 | yes | no  | 4     | 0.0433      | 53.747 |
| VSQVIHEGGHN(deVTK                          | 1503.7794 | IPI00463764 | IPI00463764 | yes | no  | 2,3,4 | 5.2942E-70  | 220.59 |
| VSNYIGQAN(deQSAWITVIPK                     | 2088.1004 | IPI0082868E | IPI0082868E | yes | no  | 3     | 8.2066E-09  | 129.88 |
| VSN(deVSCEASVSK                            | 1265.5922 | IPI0013556C | IPI0013556C | yes | no  | 2     | 0.01518     | 69.602 |
| VSITN(deVSISDEGR                           | 1375.6943 | IPI0085672E | IPI0085672E | yes | no  | 2     | 0.002182    | 133.47 |
| VSIQEIIPGSEHIEMIAN(deATTIAYIKR             | 2883.5164 | IPI0012442E | IPI0012442E | yes | yes | 3,4   | 0.0009465   | 70.917 |
| VSIQEIIPGSEHIEMIAN(deATTIAYIK              | 2727.4153 | IPI0012442E | IPI0012442E | yes | yes | 2,3,4 | 2.2808E-33  | 165.1  |
| VSGQMHHMQN(deITFQTEASVAQKEKFK              | 2995.4168 | IPI00312711 | IPI00312711 | yes | no  | 3     | 5.6808E-06  | 86.557 |



|                                     |           |             |             |     |     |       |   |             |        |
|-------------------------------------|-----------|-------------|-------------|-----|-----|-------|---|-------------|--------|
| VSGQMhMQN(deITFQTEASVAQKEK          | 2591.2108 | IPI00312711 | IPI00312711 | yes | no  |       | 3 | 3.1995E-49  | 198.35 |
| VSFYFFVTSPQN(deVSDVIPR              | 2201.1157 | IPI00153202 | IPI00153202 | yes | no  | 2,3   |   | 0.0019104   | 81.157 |
| VSEDGYSIYMSN(deITK                  | 1705.7869 | IPI0012964f | IPI0012964f | yes | no  |       | 2 | 0.000818    | 103.39 |
| VRIDPPCTN(deTTAPSNIINPYVR           | 2661.2969 | IPI0065853f | IPI0065853f | yes | no  |       | 3 | 8.0371E-15  | 132.74 |
| VREAN(deITEDQIIFPK                  | 1919.0153 | IPI00122122 | IPI00122122 | yes | no  | 2,3   |   | 1.3776E-26  | 190.11 |
| VQVWPGPSGYSSITAIEN(deSTDGK          | 2392.1547 | IPI0031557f | IPI0031557f | yes | yes | 2,3   |   | 4.602E-19   | 148.29 |
| VQSIQTIAAN(deNSAIK                  | 1627.8893 | IPI00129304 | IPI00129304 | yes | yes | 2,3   |   | 3.3667E-34  | 190.46 |
| VQPMTASN(deWTIVMEGEWMIK             | 2350.116  | IPI0045382f | IPI0045382f | yes | no  |       | 3 | 4.8516E-09  | 127.97 |
| VQPIVAVADEGWYIQN(deK                | 2042.0837 | IPI0011116f | IPI0011116f | yes | no  |       | 3 | 2.7171E-38  | 199.15 |
| VQPIASSTIIHSDITSVYGTVMN(deR         | 2687.3953 | IPI0067425f | IPI0067425f | yes | yes | 3,4   |   | 3.3904E-14  | 116.43 |
| VQPFN(deVTK                         | 931.51272 | IPI00222967 | IPI00222967 | yes | no  |       | 2 | 0.042736    | 73.665 |
| VQGGSSVWGSVITHN(deSSAITYQSWGR       | 2763.3365 | IPI00453977 | IPI00453977 | yes | no  | 3,4   |   | 9.1881E-17  | 126.86 |
| VQGAWPIIDNDFIVQATSSPVSSGAN(deATTIR  | 3361.6943 | IPI00380441 | IPI00380441 | yes | yes |       | 4 | 2.6515E-30  | 125.54 |
| VPNNAIEGIEN(deITAIYIHNEIQEVGSSMR    | 3347.6568 | IPI00120187 | IPI00120187 | yes | yes |       | 4 | 2.9474E-05  | 71.002 |
| VPMMVQSGN(deISYFR                   | 1627.7851 | IPI0011610f | IPI0011610f | yes | yes | 2,3   |   | 0.0008948   | 111.79 |
| VPGN(deITSVIISNIVPR                 | 1677.9778 | IPI00221547 | IPI00221547 | yes | no  |       | 2 | 0.0013253   | 95.347 |
| VPFIFNINPATTN(deFTGSCQPQSAQIR       | 2907.4338 | IPI00222967 | IPI00222967 | yes | no  | 3,4   |   | 5.1566E-08  | 94.389 |
| VNYEGGTWDWIAEAISSN(deHTR            | 2405.1036 | IPI0013458f | IPI0013458f | yes | yes | 2,3   |   | 4.7672E-21  | 153.65 |
| VNRFN(deSTEYQVVTR                   | 1711.8642 | IPI0011906f | IPI0011906f | yes | no  | 2,3   |   | 5.7574E-23  | 182.02 |
| VNNREIVSDPIYVEVQGIPYFIKQP(deESVNVTR | 3701.9417 | IPI00121254 | IPI00121254 | yes | yes |       | 4 | 0.0332      | 57.902 |
| VNGTDIAPDIIN(deGSQIIR               | 2008.0953 | IPI0013169f | IPI0013169f | yes | no  |       | 2 | 1.9519E-25  | 137.73 |
| VNGEEDFSWFGYSIHGVTVAN(deR           | 2483.1506 | IPI0022571f | IPI0022571f | yes | yes |       | 3 | 0.0007462   | 79.467 |
| VNDNK(deTAAEEAIR                    | 1429.7161 | IPI0040001f | IPI0040001f | yes | no  |       | 2 | 1.0409E-22  | 183.96 |
| VNCEERNVTGIEN(deFTIK                | 2021.984  | IPI00378224 | IPI00378224 | yes | yes | 2,3   |   | 0.011244    | 73.833 |
| VNCEERN(deVTGIENFTIK                | 2021.984  | IPI00378224 | IPI00378224 | yes | yes | 2,3   |   | 0.011244    | 73.833 |
| VNASTTDPN(deSTVEQSAITR              | 1989.9603 | IPI0033878f | IPI0033878f | yes | no  | 2,3   |   | 0.0036002   | 85.61  |
| VN(deYTRAEEIFSR                     | 1483.7419 | IPI0013116f | IPI0013116f | yes | yes |       | 2 | 0.015255    | 79.466 |
| VN(deKTEEDYAR                       | 1223.5782 | IPI0013310f | IPI0013310f | yes | no  |       | 2 | 6.5518E-09  | 154.15 |
| VN(deITVIPSITSR                     | 1298.7558 | IPI00323857 | IPI00323857 | yes | no  |       | 2 | 0.0012571   | 130.56 |
| VN(deISFPSAQSIASDTHIK               | 2011.0375 | IPI0062466f | IPI0062466f | yes | yes | 2,3   |   | 1.693E-79   | 220.82 |
| VN(deGTKEPIEFK                      | 1260.6714 | IPI00345112 | IPI00345112 | yes | no  |       | 2 | 0.014709    | 86.114 |
| VN(deGTITQVIIVGAPTHDDVSK            | 2163.1535 | IPI0022571f | IPI0022571f | yes | yes | 2,3   |   | 3.4539E-59  | 207.43 |
| VN(deGTDIAPDIINGSQIIR               | 2008.0953 | IPI0013169f | IPI0013169f | yes | no  |       | 2 | 1.9519E-25  | 137.73 |
| VMVITDGDIFGDPIN(deITTVINSPK         | 2657.3986 | IPI00119181 | IPI00119181 | yes | no  |       | 3 | 0.0024846   | 62.589 |
| VMSWWDYGYQITAMAN(deR                | 2090.9343 | IPI0010910f | IPI0010910f | yes | yes | 2,3   |   | 6.2231E-89  | 212.39 |
| VMSWWDYGYQIAGMAN(deR                | 2046.908  | IPI0031646f | IPI0031646f | yes | yes | 2,3   |   | 5.2644E-75  | 220.21 |
| VKPTPPYN(deISVTNSEEISSIK            | 2415.2897 | IPI0012015f | IPI0012015f | yes | yes |       | 3 | 1.3884E-30  | 171.47 |
| VIIYIPAYN(deCTIRPVSKR               | 2049.1194 | IPI00469387 | IPI00469387 | yes | no  |       | 4 | 0.0076302   | 93.348 |
| VIIYIPAYN(deCTIRPVSK                | 1893.0182 | IPI00469387 | IPI00469387 | yes | no  | 2,3   |   | 0.0051433   | 89.624 |
| VIWTINPNHISN(deGTIAAPVVVIPDIDEDGVR  | 3323.7514 | IPI0046699f | IPI0046699f | yes | no  | 3,4,5 |   | 4.6595E-06  | 78.978 |
| VIVPPAPPSCSIQGVYVGTN(deVTINCK       | 2866.4721 | IPI00126827 | IPI00126827 | yes | no  | 3,4   |   | 2.6001E-06  | 83.871 |
| VIVAPPSEEAN(deTTK                   | 1454.7617 | IPI0087541f | IPI0087541f | yes | no  |       | 2 | 0.0021524   | 102.9  |
| VITNQESPYQN(deHTGR                  | 1742.8336 | IPI0012531C | IPI0012531C | yes | no  | 2,3   |   | 9.181E-12   | 164.15 |
| VITMANQVITVN(deISEEGR               | 1973.0252 | IPI0098726f | IPI0098726f | yes | yes |       | 3 | 1.4184E-25  | 159.69 |
| VITIAN(deFTTK                       | 1106.6336 | IPI00109727 | IPI00109727 | yes | yes |       | 2 | 0.0007097   | 119.27 |
| VISNN(deCTS YGVIDIGK                | 1738.856  | IPI00331214 | IPI00331214 | yes | yes | 2,3   |   | 4.094E-12   | 161.99 |
| VISN(deNCTS YGVIDIGK                | 1738.856  | IPI00331214 | IPI00331214 | yes | yes | 2,3   |   | 4.094E-12   | 161.99 |
| VISIAQAHSIN(deFSCEQVR               | 2058.0317 | IPI0030899C | IPI0030899C | yes | yes |       | 3 | 1.2259E-05  | 119.56 |
| VIQIAMGDSAAQN(deK                   | 1572.793  | IPI00321717 | IPI00321717 | yes | no  |       | 3 | 0.0014251   | 94.717 |
| VIPFN(deVTDYQCQIVR                  | 1722.8763 | IPI00828222 | IPI00828222 | yes | no  | 2,3   |   | 7.8371E-56  | 210.64 |
| VINN(deITNDIR                       | 1170.6357 | IPI0012817f | IPI0012817f | yes | no  |       | 2 | 0.0012718   | 113.69 |
| VINDTWAWKN(deATIAEQAK               | 2058.0534 | IPI00123342 | IPI00123342 | yes | yes | 2,3   |   | 9.1884E-19f | 283.49 |
| VINADQGSATVQMIIN(deDTCPIFVR         | 2762.3731 | IPI0032006f | IPI0032006f | yes | yes | 3,4   |   | 6.2482E-16  | 121.25 |
| VIN(deITDNTYFK                      | 1326.682  | IPI00130117 | IPI00130117 | yes | yes |       | 2 | 0.0013003   | 106.01 |
| VIN(deDTWAWKNATIAEQAK               | 2058.0534 | IPI00123342 | IPI00123342 | yes | yes | 2,3   |   | 9.1884E-19f | 283.49 |
| VIN(deDTWAWK                        | 1131.5713 | IPI00123342 | IPI00123342 | yes | yes |       | 2 | 0.031398    | 73.985 |
| VIKDAVNN(deITAK                     | 1284.7402 | IPI0062679f | IPI0062679f | yes | no  |       | 2 | 0.0057513   | 105.65 |
| VIIRPYITPNNQGIYIFQGN(deSTVR         | 2762.4868 | IPI0031950f | IPI0031950f | yes | yes | 2,3,4 |   | 7.3498E-257 | 222.91 |
| VIIIN(deITTVAAANHG YTK              | 1713.9414 | IPI0046760C | IPI0046760C | yes | no  | 2,3   |   | 1.9363E-58  | 218.28 |
| VIIIDPAISGN(deETEPYPAFTR            | 2415.2686 | IPI0084869f | IPI0084869f | yes | yes | 2,3   |   | 1.7564E-31  | 177.08 |
| VIIIAQTHAN(deNTGSYHCYYK             | 2352.1321 | IPI0027313f | IPI0027313f | yes | yes |       | 3 | 0.0070479   | 66.022 |
| VIHIQFNSISSITDDTFCKAN(deDTR         | 2781.3392 | IPI0012084f | IPI0012084f | yes | yes | 3,4   |   | 8.5825E-16  | 128.38 |
| VIFYKDDAMVYN(deVTSR                 | 1919.9451 | IPI00406901 | IPI00406901 | yes | no  | 2,3   |   | 0.012009    | 74.769 |
| VIFKN(deYSINDATITIHNI GFSDSGK       | 2753.4024 | IPI00471187 | IPI00471187 | yes | no  |       | 3 | 2.3845E-19  | 133.74 |
| VIETIPANYSIN(deSSK                  | 1634.8516 | IPI00480532 | IPI00480532 | yes | no  | 2,3   |   | 1.8781E-09  | 160.48 |
| VIETIPAN(deYSINSSK                  | 1634.8516 | IPI00480532 | IPI00480532 | yes | no  | 2,3   |   | 1.8781E-09  | 160.48 |
| VIEQSYN(deATWIGR                    | 1535.7732 | IPI00762242 | IPI00762242 | yes | yes |       | 2 | 0.0035622   | 81.904 |
| VIENEKFDTHEYHN(deESR                | 2145.9716 | IPI00463492 | IPI00463492 | yes | yes | 2,3   |   | 9.273E-08   | 142.39 |
| VIEEFYN(deQTNWHR                    | 1734.8114 | IPI00308691 | IPI00308691 | yes | no  | 2,3   |   | 0.0025965   | 124.45 |
| VIDIW DIAQSAN(deFTEKEIESFREEIK      | 3109.5608 | IPI00469307 | IPI00469307 | yes | no  |       | 4 | 0.019489    | 60.735 |
| VIDIW DIAQSAN(deFTEK                | 1848.9258 | IPI00469307 | IPI00469307 | yes | no  | 2,3   |   | 6.8534E-06  | 141.85 |
| VIAQHQNIIIFAN(deSSSSMR              | 2002.0054 | IPI0031904C | IPI0031904C | yes | no  |       | 3 | 3.3977E-05  | 115.38 |
| VHSGN(deFSTIPQYFK                   | 1623.8045 | IPI01023131 | IPI01023131 | yes | no  | 2,3   |   | 0.012559    | 69.345 |
| VGYSQSN(deISCFRR                    | 1604.7406 | IPI0046425f | IPI0046425f | yes | yes |       | 2 | 2.9766E-05  | 150.12 |
| VGVNKN(deQTVTATFGYPFR               | 1998.0323 | IPI0011425f | IPI0011425f | yes | no  | 2,3,4 |   | 2.7249E-93  | 216.72 |
| VGQIQISHN(deISFVIVVPVFPK            | 2320.3307 | IPI00122977 | IPI00122977 | yes | yes |       | 3 | 0.0046102   | 68.243 |
| VGKNEAVIAWDQIPVDDQNGFIRN(deYSISYR   | 3466.727  | IPI0012015f | IPI0012015f | yes | yes |       | 4 | 0.0003539   | 68.689 |
| VGIVTYSN(deETR                      | 1237.6303 | IPI0085510f | IPI0085510f | yes | no  |       | 2 | 0.0003375   | 129.84 |
| VGATAAVYSAAII EYITAEVIEIAGN(deASK   | 2894.5277 | IPI0055505f | IPI0055505f | yes | no  | 2,3   |   | 3.1265E-48  | 171.08 |
| VFVYTPPTN(deYTIR                    | 1573.814  | IPI0012442f | IPI0012442f | yes | yes | 2,3   |   | 3.4051E-07  | 111.94 |
| VFPYISVMVNN(deGSISYDHSKDGR          | 2584.238  | IPI00321634 | IPI00321634 | yes | yes | 3,4,5 |   | 2.0787E-09  | 116.06 |
| VFPYISVMVNN(deGSISYDHSK             | 2256.0885 | IPI00321634 | IPI00321634 | yes | yes | 2,3,4 |   | 3.5593E-96  | 232.15 |
| VFPYISAMVNN(deGSISYDHER             | 2298.0739 | IPI0083035f | IPI0083035f | yes | no  | 2,3,4 |   | 8.389E-11   | 136.2  |
| VFNGKDN(deISK                       | 1120.5877 | IPI00331214 | IPI00331214 | yes | yes |       | 2 | 0.012231    | 98.898 |
| VFKTN(deSTQVSDVR                    | 1479.7682 | IPI0046942f | IPI0046942f | yes | no  | 2,3   |   | 8.3039E-05  | 150.11 |
| VFKPQSGADAIN(deDSQDFPFETPAK         | 2705.2973 | IPI0046246f | IPI0046246f | yes | no  | 3,4   |   | 1.856E-55   | 192.27 |

|                                           |           |             |             |     |     |       |              |        |
|-------------------------------------------|-----------|-------------|-------------|-----|-----|-------|--------------|--------|
| VFIVPVGN(deHSNIPFSR                       | 1781.9577 | IPI0022141E | IPI0022141E | yes | no  | 2,3   | 4.1748E-12   | 161.82 |
| VFIQGYQIHASICN(deGSK                      | 2034.0357 | IPI00112614 | IPI00112614 | yes | yes |       | 3 0.00043    | 95.662 |
| VFGSQN(deITTVKIK                          | 1433.8242 | IPI00123342 | IPI00123342 | yes | yes |       | 3 0.0098362  | 81.92  |
| VFGSQN(deITTVK                            | 1192.6452 | IPI00123342 | IPI00123342 | yes | yes |       | 2 0.0022776  | 98.407 |
| VFDIHNMGSVN(deVSVGCTPAQIIETSR             | 2958.4328 | IPI00116913 | IPI00116913 | yes | no  |       | 3 1.6689E-24 | 132.36 |
| VETGVKPGMVVTFAPVN(deVTTEVK                | 2514.3767 | IPI00307837 | IPI00307837 | yes | yes | 3,4   | 7.5682E-29   | 158.52 |
| VETGEN(deCTSPAPK                          | 1388.6242 | IPI00469221 | IPI00469221 | yes | no  |       | 2 0.0055572  | 78.814 |
| VEFDDKGNVITSYGNPIIIN(deSSIPEDATIK         | 3248.6453 | IPI00122257 | IPI00122257 | yes | no  |       | 3 2.5447E-46 | 151.19 |
| VDVIVAN(deITVTDKDPHTPAWNAAYR              | 2893.4723 | IPI00323134 | IPI00323134 | yes | no  |       | 3 1.1748E-07 | 95.624 |
| VDNA(deSIVADDMRNAYISIEGK                  | 2280.1056 | IPI00356462 | IPI00356462 | yes | no  |       | 2 0.018058   | 65.022 |
| VDIPQQPMGIIAVAN(deDTNSCEISPCR             | 2884.3517 | IPI00119063 | IPI00119063 | yes | yes |       | 3 0.0011941  | 66.3   |
| VDIEDFEN(deNTAYAK                         | 1627.7366 | IPI0055116E | IPI0055116E | yes | no  |       | 2 2.6064E-28 | 134.88 |
| VDFIWHPEVN(deGSMK                         | 1657.7923 | IPI0038029E | IPI0038029E | yes | yes |       | 3 0.011626   | 69.716 |
| VDDEMPQHAVISGNIFINNINKTDN(deGTYR          | 3371.6205 | IPI00856723 | IPI00856723 | yes | no  | 3,4   | 1.0161E-10   | 95.666 |
| VDDEMPQHAVISGNIFINNIN(deKTDNGTYR          | 3371.6205 | IPI00856723 | IPI00856723 | yes | no  | 3,4   | 1.0161E-10   | 95.666 |
| VDDEMPQHAVISGNIFINNIN(deK                 | 2564.2693 | IPI00856723 | IPI00856723 | yes | no  |       | 3 1.2097E-22 | 159.75 |
| VDCTANTN(deTCNK                           | 1396.5711 | IPI0023010E | IPI0023010E | yes | no  |       | 2 0.009647   | 73.877 |
| VAQPGINYAIGTN(deTSYPNNIIR                 | 2375.2234 | IPI0022636C | IPI0022636C | yes | no  | 2,3   | 3.3918E-31   | 174.04 |
| VAN(deITVVVNSIDGK                         | 1427.7984 | IPI00310797 | IPI00310797 | yes | yes |       | 3 0.0012499  | 131.32 |
| VAEVENGTKPDSVPEHCIDTWSFDAATMDHN(deGTMIFFK | 4410.9508 | IPI00128484 | IPI00128484 | yes | yes |       | 4 1.3431E-08 | 63.848 |
| VAEVEN(deGTKPDSVPEHCIDTWSFDAATMDHNGTMIFFK | 4410.9508 | IPI00128484 | IPI00128484 | yes | yes |       | 4 1.3431E-08 | 63.848 |
| VAAN(deFSTPVIISTDSSNPGQER                 | 2263.0717 | IPI00227797 | IPI00227797 | yes | no  |       | 3 3.7485E-09 | 112.44 |
| TYEN(deGSSVEYR                            | 1303.5681 | IPI00122117 | IPI00122117 | yes | yes |       | 2 0.0050957  | 86.911 |
| TYEDESPEWFQEDDAVQPN(deSSYTYVWHATKR        | 3777.6496 | IPI00406603 | IPI00406603 | yes | yes |       | 4 2.6071E-16 | 105.03 |
| TYEDESPEWFQEDDAVQPN(deSSYTYVWHATK         | 3621.5485 | IPI00406603 | IPI00406603 | yes | yes |       | 3 2.265E-59  | 170.65 |
| TYCANEPISNCSQVN(deR                       | 1911.8203 | IPI0012777C | IPI0012777C | yes | yes |       | 2 2.4908E-12 | 165.58 |
| TYCANEPISN(deCSQVNR                       | 1911.8203 | IPI0012777C | IPI0012777C | yes | yes |       | 2 2.4908E-12 | 165.58 |
| TYAVYDIFDTAMINN(deSR                      | 1992.9251 | IPI0022679C | IPI0022679C | yes | no  | 2,3   | 2.2577E-28   | 188.41 |
| TYADDVNSEIVNIYTFN(deHTVTR                 | 2571.2241 | IPI00330714 | IPI00330714 | yes | no  | 2,3   | 1.2774E-39   | 189.34 |
| TWAN(deYSECIK                             | 1270.5652 | IPI00114634 | IPI00114634 | yes | yes |       | 2 0.002365   | 105.46 |
| TVYIHAN(deQTGYDPDSSR                      | 1904.9017 | IPI0011903E | IPI0011903E | yes | yes |       | 2 0.0052529  | 70.942 |
| TVVVDN(deETVATR                           | 1302.6779 | IPI00115231 | IPI00115231 | yes | no  |       | 2 0.0023943  | 99.941 |
| TVVTEAGNIIKDN(deATQEEIIHYIEK              | 2827.4604 | IPI0032119C | IPI0032119C | yes | no  | 2,3,4 | 8.1428E-142  | 248.46 |
| TVVQYSPN(deIIFSGIEIQKDCESNQNITCR          | 3628.7138 | IPI00466371 | IPI01026704 | no  | no  | 3,4   | 3.9405E-11   | 98.491 |
| TVVAPSTEGGIN(deITSTFIR                    | 1962.0422 | IPI00114252 | IPI00114252 | yes | no  | 2,3   | 1.8242E-12   | 141.83 |
| TVSTIVIQAAN(deVSAIYK                      | 1776.9986 | IPI0012432E | IPI0012432E | yes | no  | 2,3   | 1.1251E-27   | 181.51 |
| TVNSIN(deVSAISIPHEHDEADDISDENREK          | 3096.4483 | IPI0012137E | IPI0012137E | yes | no  |       | 3 2.3785E-38 | 159.98 |
| TVNSIN(deVSAISIPHEHDEADDISDENR            | 2839.3108 | IPI0012137E | IPI0012137E | yes | no  |       | 3 3.4917E-20 | 132.26 |
| TVN(deMTTIIIGR                            | 1217.6802 | IPI00356462 | IPI00356462 | yes | no  |       | 2 0.0056273  | 84.479 |
| TVN(deITRDNIIDDVISFIR                     | 2103.1324 | IPI0023071E | IPI0023071E | yes | no  |       | 3 5.3642E-25 | 138.39 |
| TVIQFVAN(deISK                            | 1218.6972 | IPI00626137 | IPI00626137 | yes | no  |       | 2 0.0007247  | 112.43 |
| TVIDKNGDAYGYYN(deDSIK                     | 2034.9535 | IPI00471081 | IPI00471081 | yes | yes | 2,3   | 2.9343E-37   | 196.64 |
| TVFAEHISN(deECKR                          | 1589.762  | IPI0045810E | IPI0045810E | yes | yes |       | 3 0.010836   | 78.903 |
| TVDKSTGKPTIYN(deVSIIMSDTGTCY              | 2807.3357 | IPI0046805E | IPI0046805E | yes | yes |       | 3 8.0758E-29 | 155.86 |
| TVAN(deISGCEATDSEAIHCIR                   | 2316.0838 | IPI00154043 | IPI00154043 | yes | yes | 2,3,4 | 9.6617E-14C  | 251.35 |
| TTVKNITVIEPVTQPFQVTN(deTTVK               | 2770.548  | IPI0010853E | IPI0010853E | yes | no  | 2,3,4 | 1.9549E-55   | 192.27 |
| TTVKN(deITVIEPVTQPFQVTNTTVK               | 2770.548  | IPI0010853E | IPI0010853E | yes | no  | 2,3,4 | 1.9549E-55   | 192.27 |
| TTIVDNNTWN(deNSHIAIVGK                    | 2096.0651 | IPI0031646E | IPI0031646E | yes | yes | 2,3   | 0            | 361.2  |
| TTIVDN(deNTWNNSHIAIVGK                    | 2096.0651 | IPI0031646E | IPI0031646E | yes | yes | 2,3   | 0            | 361.2  |
| TSYCN(deESFYFICKK                         | 1845.8066 | IPI0012618E | IPI0012618E | yes | yes |       | 3 7.4982E-16 | 171.32 |
| TSYCN(deESFYFICK                          | 1717.7116 | IPI0012618E | IPI0012618E | yes | yes | 2,3   | 4.5876E-21   | 171.73 |
| TSSEFCQPVSIHGSN(deHTSK                    | 2101.9487 | IPI00894972 | IPI00894972 | yes | no  | 2,3   | 1.3488E-06   | 119.08 |
| TSRPTDNSIN(deVTCGPPYETNGPK                | 2504.1602 | IPI00323053 | IPI00323053 | yes | no  |       | 3 9.7455E-26 | 167.63 |
| TSN(deITDTQIAEAYIYR                       | 1857.9109 | IPI0031920C | IPI0031920C | yes | no  |       | 2 2.9966E-18 | 177.56 |
| TSIIVIN(deNTESNIEDFIQSIK                  | 2377.2377 | IPI0017014E | IPI0017014E | yes | yes | 2,3   | 0            | 276.68 |
| TSIDIWMHTDPMSQKN(deESVK                   | 2346.0984 | IPI00118674 | IPI00118674 | yes | yes |       | 3 2.6627E-05 | 101.05 |
| TSICSDAN(deCTIGSSDTHSSGIGTGR              | 2655.1137 | IPI0047108E | IPI0047108E | yes | no  |       | 3 0.0002731  | 73.981 |
| TSDTGEEEEAITN(deSTEANGKYVVVSTPEK          | 2955.3833 | IPI0040849E | IPI0040849E | yes | no  | 3,4   | 3.9988E-17E  | 265.13 |
| TSDTGEEEEAITN(deSTEANGK                   | 1952.8447 | IPI0040849E | IPI0040849E | yes | no  | 2,3   | 1.0474E-287  | 312.86 |
| TR(deCNTTQGNVTSIIR                        | 1848.9112 | IPI00134743 | IPI00134743 | yes | no  |       | 2 0.0073518  | 81.594 |
| TQVFGPVDPTVN(deTTYAFFNTFFK                | 2640.29   | IPI0011553C | IPI0011553C | yes | yes |       | 3 4.9518E-38 | 143.91 |
| TQN(deGSIPAVTR                            | 1142.6044 | IPI0012124C | IPI0012124C | yes | yes |       | 2 0.003308   | 93.623 |
| TQMVFFNITPNIIN(deDTMEIR                   | 2396.1868 | IPI0012785E | IPI0012785E | yes | yes | 2,3   | 7.6642E-33   | 183.22 |
| TQMVFFN(deITPNIINDTMEIR                   | 2396.1868 | IPI0012785E | IPI0012785E | yes | yes | 2,3   | 7.6642E-33   | 183.22 |
| TQITCSIN(deSSGVDIVGHR                     | 1942.9531 | IPI0040849E | IPI0040849E | yes | no  | 2,3   | 1.3352E-91   | 234.38 |
| TQDSIIQAETQANSCN(deITVVTIQESIEKK          | 3247.6242 | IPI00321222 | IPI00321222 | yes | yes | 3,4   | 7.8761E-32   | 145.54 |
| TPVIN(deCSVAVCK                           | 1346.6686 | IPI00120674 | IPI00120674 | yes | no  |       | 2 0.0087538  | 75.088 |
| TPTIPPVSFHIGGVWFN(deITGQDYVIK             | 2885.5116 | IPI00113797 | IPI00113797 | yes | yes |       | 3 0.0014044  | 65.207 |
| TPMTN(deSSIR                              | 1005.4913 | IPI0022142E | IPI0022142E | yes | yes |       | 2 0.0023838  | 119.53 |
| TPASDPHGDN(deITYSVFYTK                    | 2111.98   | IPI0012915E | IPI0012915E | yes | no  | 2,3   | 4.6929E-08   | 124.18 |
| TNSTQ(deVSDVR                             | 1105.5364 | IPI0046942E | IPI0046942E | yes | no  |       | 2 0.022512   | 72.2   |
| TNIEGQVPFIPAN(deFTAHPYKEFYHYR             | 3352.6669 | IPI00129903 | IPI00129903 | yes | yes |       | 4 0.01089    | 55.469 |
| TNIEGQVPFIPAN(deFTAHPYK                   | 2457.2692 | IPI00129903 | IPI00129903 | yes | yes | 3,4   | 8.1967E-39   | 184.6  |
| TN(deSSFIQGFVDHVKEDCDRIGPGVSDICK          | 3279.5289 | IPI0032119C | IPI0032119C | yes | no  |       | 4 0.015193   | 55.986 |
| TN(deSSFIQGFVDHVKEDCDR                    | 2253.012  | IPI0032119C | IPI0032119C | yes | no  | 2,3,4 | 3.3717E-79   | 223.29 |
| TN(deSSFIQGFVDHVK                         | 1577.7838 | IPI0032119C | IPI0032119C | yes | no  | 2,3   | 1.0912E-43   | 205.62 |
| TN(deQSCEIVIDSTEK                         | 1622.7458 | IPI0031005E | IPI0031005E | yes | no  |       | 2 0.0013067  | 128.74 |
| TN(deKSEMWDVFCYR                          | 1734.7494 | IPI0046760C | IPI0046760C | yes | no  | 2,3   | 0.0095022    | 100.38 |
| TN(deITSIIQPIPSIVK                        | 1809.0612 | IPI0098598E | IPI0098598E | yes | no  |       | 3 0.000104   | 114.27 |
| TMVFPVMIYIN(deESVIIDKETANQIK              | 2782.4285 | IPI00127447 | IPI00127447 | yes | yes | 2,3,4 | 6.2499E-94   | 224.86 |
| TMVFPVMIYIN(deESVIIDK                     | 1998.0206 | IPI00127447 | IPI00127447 | yes | yes |       | 3 1.885E-272 | 223.7  |
| TMTSGDPGETAN(deATEVKK                     | 1835.8571 | IPI00114844 | IPI00114844 | yes | yes | 2,3   | 0.0050806    | 78.95  |
| TMTSGDPGETAN(deATEVK                      | 1707.7621 | IPI00114844 | IPI00114844 | yes | yes |       | 2 8.1563E-05 | 115.73 |
| TMTIIEAGN(deNTMK                          | 1422.6847 | IPI0013111E | IPI0013111E | yes | yes |       | 2 0.0037967  | 78.486 |
| TMFN(deSTEIK                              | 1069.5114 | IPI0067739E | IPI0067739E | yes | no  |       | 2 0.012344   | 85.958 |
| TKTQVFGPVDPT(deVNTTYAFFNTFFK              | 2869.4327 | IPI0011553C | IPI0011553C | yes | yes |       | 3 1.1996E-55 | 195.03 |

|                                              |           |             |             |     |     |       |   |             |        |
|----------------------------------------------|-----------|-------------|-------------|-----|-----|-------|---|-------------|--------|
| TKDISHSIYMFFN(deTSDIR                        | 2174.0466 | IPI00114457 | IPI00114457 | yes | yes |       | 3 | 0.0038218   | 86.378 |
| TIYN(deWSGYPIIVHK                            | 1689.8879 | IPI00471081 | IPI00471081 | yes | yes | 2,3   |   | 0.0001389   | 143.46 |
| TIYETEVFSTDFSN(deVSAAQHK                     | 2373.1125 | IPI00410951 | IPI00410951 | yes | yes |       | 3 | 0.0003788   | 86.453 |
| TITVYN(deFSAPVITISQIEVSEGSQVTVK              | 3009.591  | IPI00122973 | IPI00122973 | yes | no  | 2,3,4 |   | 2.1894E-26  | 136.34 |
| TITIINVTRN(deDTGPPYVCETR                     | 2322.1638 | IPI00108535 | IPI00108535 | yes | no  | 2,3   |   | 1.9423E-96  | 238.19 |
| TITIIN(deVTRNDTGPYVCETR                      | 2322.1638 | IPI00108535 | IPI00108535 | yes | no  | 2,3   |   | 1.9423E-96  | 238.19 |
| TITIIN(deVTR                                 | 1029.6182 | IPI00108535 | IPI00108535 | yes | no  |       | 2 | 5.1421E-09  | 148.56 |
| TISPTGN(deISSAPK                             | 1271.6721 | IPI00263505 | IPI00263505 | yes | no  |       | 2 | 0.0032713   | 107.53 |
| TISDVPSAAPQN(deISIEVR                        | 1895.9953 | IPI00129155 | IPI00129155 | yes | no  |       | 2 | 1.5191E-28  | 186.97 |
| TIPHHQYN(deATINK                             | 1535.7845 | IPI00348265 | IPI00348265 | yes | yes | 2,3   |   | 0.0002115   | 145.81 |
| TIN(deWSAAEPGAWATKVEWDEHK                    | 2525.1975 | IPI0033144C | IPI0033144C | yes | no  |       | 3 | 1.0934E-10  | 121.44 |
| TIN(deWSAAEPGAWATK                           | 1601.7838 | IPI0033144C | IPI0033144C | yes | no  | 2,3   |   | 1.021E-24   | 183.23 |
| TIMSAEANIAGIFPPNEVQHFNPN(deISWQPIPVHTVPITEDR | 4579.2958 | IPI00154055 | IPI00154055 | yes | no  | 4,5   |   | 4.8568E-19  | 99.357 |
| TIIVDNNTWN(deNTHISR                          | 1896.9442 | IPI00109105 | IPI00109105 | yes | yes | 2,3   |   | 0           | 277    |
| TIIVDN(deNTWNNTHISR                          | 1896.9442 | IPI00109105 | IPI00109105 | yes | yes | 2,3   |   | 0           | 277    |
| TIISYYN(deQSAGGSHTIQVISGCEVGS DGR            | 3055.4305 | IPI00474494 | IPI00474494 | yes | no  |       | 3 | 5.619E-38   | 151.42 |
| TIIPAAAQDVYYRDEIGN(deVSTSHIIIDDSVEMEIRPR     | 4299.1845 | IPI00309035 | IPI00309035 | yes | yes | 4,5   |   | 2.9611E-11  | 77.233 |
| TIIGYYN(deQSNDESHTIQWMYGCDVGP DGR            | 3375.4561 | IPI00322542 | IPI00322542 | yes | yes | 3,4   |   | 4.416E-38   | 153.17 |
| TIIGYYN(deQSESGSHTIQWMYGCK                   | 2722.2156 | IPI00608044 | IPI00608044 | yes | no  | 3,4   |   | 0.000143    | 82.586 |
| TIIGYYN(deQSAGGHTIQWMYGCDVGS DGR             | 3206.4186 | IPI00109995 | IPI00109995 | yes | yes | 3,4   |   | 7.6254E-66  | 194.97 |
| TIGISPFHEFADVFTAN(deDSGHR                    | 2516.2084 | IPI0012756C | IPI0012756C | yes | yes | 2,3,4 |   | 5.3422E-103 | 234.38 |
| TIFPNYFN(deGSEIVIAGK                         | 1868.9672 | IPI00222365 | IPI00222365 | yes | yes |       | 2 | 5.2949E-07  | 136.39 |
| TIEQERN(deASFVYTKAIMAYAFIAGNQNK              | 3248.6288 | IPI00123223 | IPI00123223 | yes | yes |       | 4 | 0.019157    | 53.747 |
| TIEQERN(deASFVYTK                            | 1684.842  | IPI00123223 | IPI00123223 | yes | no  | 2,3   |   | 2.2197E-55  | 210.41 |
| TIEDIIFRAEN(deR                              | 1475.7732 | IPI00122312 | IPI00122312 | yes | no  |       | 3 | 0.0066466   | 99.568 |
| TIAGEN(deQTAIEIEEINR                         | 1899.9538 | IPI00400015 | IPI00400015 | yes | no  | 2,3   |   | 8.0274E-105 | 239.58 |
| TGVNSGVMIMN(deMTR                            | 1509.7102 | IPI00856861 | IPI00856861 | yes | no  | 2,3   |   | 0.0006772   | 110.98 |
| TGVHDGDFEYN(deITTTIAAINK                     | 2279.107  | IPI00108845 | IPI00108845 | yes | no  |       | 3 | 3.8166E-15  | 138.66 |
| TGTIAIQN(deTTQIR                             | 1415.7732 | IPI00623114 | IPI00623114 | yes | no  |       | 2 | 0.0002907   | 143.94 |
| TGHTNAHGK(deDIDTDFTSNASQPETK                 | 2671.211  | IPI00130573 | IPI00130573 | yes | yes |       | 3 | 2.9597E-24  | 141.78 |
| TGHRPPNPAFWVN(deGSGTEVK                      | 2336.145  | IPI00221555 | IPI00221555 | yes | no  |       | 3 | 0.014996    | 66.874 |
| TGEIN(deITSIVDR                              | 1316.6936 | IPI0038046C | IPI0038046C | yes | no  |       | 2 | 0.001894    | 106.58 |
| TGEIFTFN(deTTAAQPQYFKYFPDGVDSVIVK            | 3511.7188 | IPI00330714 | IPI00330714 | yes | no  | 3,4   |   | 9.2496E-47  | 155.8  |
| TGEIFTFN(deTTAAQPQYFK                        | 2063      | IPI00330714 | IPI00330714 | yes | no  | 2,3   |   | 3.6208E-28  | 182.49 |
| TGEAN(deITQIYTQEAIQIQTHAR                    | 2747.3515 | IPI0031009C | IPI0031009C | yes | no  | 2,3,4 |   | 2.3565E-145 | 254.4  |
| TGDGNSVTSN(deFTKDPSSIIPEIIPGVSYTVK           | 3248.6816 | IPI00469425 | IPI00469425 | yes | no  |       | 3 | 2.6368E-07  | 87.489 |
| TGDGNSN(deVTSNFTKDPSSIIPEIIPGVSYTVK          | 3248.6816 | IPI00469425 | IPI00469425 | yes | no  |       | 3 | 2.6368E-07  | 87.489 |
| TFDVSNFQN(deSSIKR                            | 1641.8111 | IPI0027269C | IPI0027269C | yes | no  |       | 2 | 0.015625    | 73.156 |
| TFAVYIN(deSTGYR                              | 1390.6881 | IPI0026803C | IPI0026803C | yes | yes |       | 2 | 0.0096685   | 73.848 |
| TEVSNNNVIIIDQVTN(deQTIAFSFIQQDIPVR           | 3791.9734 | IPI00123223 | IPI00123223 | yes | yes | 3,4   |   | 3.2828E-06  | 73.389 |
| TEVKPVATEQIISTFITVGN(deNTCFYGK               | 3016.5216 | IPI00122494 | IPI00122494 | yes | yes |       | 3 | 0.0018759   | 67.979 |
| TEVIIQGTVSPN(deASAPDAVWEDYEFK                | 2865.3709 | IPI00405437 | IPI00405437 | yes | no  |       | 3 | 0.0059569   | 57.145 |
| TEQIPVN(deK                                  | 927.50255 | IPI0027643C | IPI0027643C | yes | yes |       | 2 | 0.013937    | 100.02 |
| TEQIIQAPN(deTSVHIYEPYPAGADVPFPPINK           | 3575.83   | IPI0013260C | IPI0013260C | yes | no  | 3,4   |   | 1.7174E-54  | 166.22 |
| TEKDPQNDPVGTCYISTEN(deFTR                    | 2571.1547 | IPI00115975 | IPI00115975 | yes | yes | 2,3   |   | 1.6923E-85  | 219.87 |
| TEIDIRPQGIATFSN(deVSEAR                      | 2215.1597 | IPI00122973 | IPI00122973 | yes | no  | 2,3,4 |   | 1.1053E-19  | 169.25 |
| TEGMIIN(deVTSSIR                             | 1419.7392 | IPI00109254 | IPI00109254 | yes | yes |       | 2 | 0.0025755   | 115.06 |
| TEFN(deITSYSSKR                              | 1431.6994 | IPI00855103 | IPI00855103 | yes | yes |       | 2 | 0.047838    | 64.55  |
| TEAGVFEYVADPTFEN(deFTGGVVK                   | 2505.2064 | IPI00405742 | IPI00405742 | yes | no  | 2,3,4 |   | 1.498E-103  | 238.8  |
| TEAGVFEYVADPTFEN(deFTGGVK                    | 2377.1114 | IPI00405742 | IPI00405742 | yes | no  | 2,3   |   | 5.4875E-39  | 186.45 |
| TDVN(deSSRNPDTIAAWYIR                        | 2078.0181 | IPI00406603 | IPI00406603 | yes | yes |       | 3 | 0.0002509   | 109.07 |
| TDPANQFEWIENTIN(deSSIWNKEK                   | 2763.314  | IPI00136255 | IPI00136255 | yes | yes | 3,4   |   | 0.0003519   | 83.849 |
| TDDEVVQREEEAIQIDGIN(deASQIR                  | 2727.3311 | IPI00129525 | IPI00129525 | yes | yes | 3,4   |   | 2.2355E-66  | 204.47 |
| TDAEIN(deETARPISPVNPK                        | 1951.0011 | IPI00408895 | IPI00408895 | yes | yes |       | 2 | 0.0001511   | 111.77 |
| TCVSN(deCTASQFVCKNDK                         | 2017.8656 | IPI00119063 | IPI00119063 | yes | yes | 2,3   |   | 9.9377E-05  | 119.23 |
| TCVSN(deCTASQFVCK                            | 1660.7007 | IPI00119063 | IPI00119063 | yes | yes | 2,3   |   | 3.0186E-56  | 216.27 |
| TCPIDEFQCN(deNTICKPIAWK                      | 2494.1443 | IPI00119063 | IPI00119063 | yes | yes |       | 3 | 4.4242E-06  | 115.73 |
| TCPAGIMGEN(deNTIVWK                          | 1789.8491 | IPI0012119C | IPI0012119C | yes | no  | 2,3   |   | 1.3625E-125 | 254.1  |
| TASVSIN(deQTEPPKVR                           | 1625.8737 | IPI0012922C | IPI0012922C | yes | yes | 2,3   |   | 5.1316E-17  | 174.59 |
| TASVSIN(deQTEPPK                             | 1370.7042 | IPI0012922C | IPI0012922C | yes | yes |       | 2 | 0.0025413   | 119.96 |
| TAQSYYN(deQSK                                | 1188.5411 | IPI0031298C | IPI0031298C | yes | no  |       | 2 | 3.818E-45   | 202.65 |
| TANDAIQDMICDMEGIPQKHN(deFSHCCGK              | 3276.3879 | IPI00130654 | IPI00130654 | yes | no  |       | 4 | 0.0056402   | 57.238 |
| TAN(deETSAEAYNIIR                            | 1664.837  | IPI00400015 | IPI00400015 | yes | no  | 2,3   |   | 9.5447E-147 | 266.45 |
| TAMAATVAPHTATIAAGTVN(deTSDPHTR               | 2662.3133 | IPI0047109C | IPI0047109C | yes | yes |       | 3 | 3.007E-22   | 124.4  |
| TAIWWATDHNTDN(deTSAIIR                       | 2098.0443 | IPI0016987C | IPI0016987C | yes | yes | 2,3   |   | 1.6911E-41  | 192.6  |
| TAIVQEVHQN(deFSAWCSQVIR                      | 2372.1695 | IPI00381303 | IPI00381303 | yes | yes | 2,3   |   | 1.3058E-10  | 133.78 |
| TAIFPDIIVQGN(deASIR                          | 1713.9414 | IPI00124075 | IPI00124075 | yes | yes |       | 3 | 0.0002429   | 112.15 |
| TAGWNIPMGIAN(deQTR                           | 1741.8934 | IPI00323235 | IPI00323235 | yes | yes | 2,3   |   | 7.8962E-35  | 197.75 |
| TAGAN(deGTSGFFCVDEGGIPIAQR                   | 2324.0855 | IPI00282285 | IPI00282285 | yes | no  | 3,4   |   | 4.9156E-26  | 166.29 |
| TAFITN(deFTITIDGVTYPGNVK                     | 2271.1787 | IPI00124725 | IPI00124725 | yes | no  |       | 2 | 1.5149E-14  | 132.01 |
| TAFAPPDIPVCIIGN(deR                          | 1739.9029 | IPI00331175 | IPI00331175 | yes | no  |       | 3 | 5.7847E-06  | 143.25 |
| TAASIIWQAYPIIN(deISEK                        | 2017.0884 | IPI00115867 | IPI00115867 | yes | yes | 2,3   |   | 2.2835E-16  | 170.16 |
| TAADATGIQPIINQFTPAN(deVSR                    | 2284.1812 | IPI00120245 | IPI00120245 | yes | no  | 2,3   |   | 5.2667E-86  | 221.25 |
| SYSSIQQDIFQFQKN(deQTSIEKK                    | 2646.3289 | IPI00128905 | IPI00128905 | yes | yes |       | 3 | 1.6569E-08  | 115.34 |
| SYSSIQQDIFQFQKN(deQTSIEK                     | 2518.234  | IPI00128905 | IPI00128905 | yes | yes |       | 3 | 3.5562E-14  | 137.61 |
| SYSFIN(deSSIIGR                              | 1342.6881 | IPI00110385 | IPI00110385 | yes | yes |       | 2 | 0.001235    | 129.37 |
| SYN(deDSVDPR                                 | 1051.4571 | IPI0011348C | IPI0011348C | yes | no  |       | 2 | 0.0065494   | 106.2  |
| SYIFIYDGNKNSTTTDQN(deFTSAK                   | 2614.2187 | IPI0012483C | IPI0012483C | yes | no  | 2,3   |   | 1.0647E-38  | 183.07 |
| SYIFIYDGNKN(deSTTTDQNFTSAK                   | 2614.2187 | IPI0012483C | IPI0012483C | yes | no  | 2,3   |   | 1.0647E-38  | 183.07 |
| SYIDDRPIQHUYAVSSPTNTTYVQYAIAN(deITGK         | 3797.9265 | IPI00118674 | IPI00118674 | yes | yes |       | 3 | 1.2937E-34  | 125.59 |
| SYIDDRPIQHUYAVSSPTN(deTTYVQYAIANITGK         | 3797.9265 | IPI00118674 | IPI00118674 | yes | yes |       | 3 | 1.2937E-34  | 125.59 |
| SYCKNGVN(deGTGENGRK                          | 1739.8009 | IPI00132474 | IPI00132474 | yes | yes | 2,3   |   | 1.3333E-145 | 265.12 |
| SYCKNGVN(deGTGENGR                           | 1611.706  | IPI00132474 | IPI00132474 | yes | yes | 2,3   |   | 0.0051622   | 116.63 |
| SWVQGN(deITACGR                              | 1347.6354 | IPI00153385 | IPI00153385 | yes | no  |       | 2 | 0.0048995   | 80.312 |
| SWSTVGN(deCTAAIRWIERYCFQGNK                  | 3066.4229 | IPI00128484 | IPI00128484 | yes | yes |       | 3 | 2.3222E-05  | 88.396 |
| SWSTVGN(deCTAAIR                             | 1421.6721 | IPI00128484 | IPI00128484 | yes | yes |       | 2 | 6.8038E-16  | 173.44 |

|                                       |           |             |             |     |     |       |             |        |
|---------------------------------------|-----------|-------------|-------------|-----|-----|-------|-------------|--------|
| SVYN(deCSGEACSGHNR                    | 1696.6682 | IPI0031472E | IPI0031472E | yes | yes | 2,3   | 9.1431E-25  | 183.96 |
| SVVHHIN(deGSTIR                       | 1318.7106 | IPI0075806E | IPI0075806E | yes | no  | 2,3   | 0.0014947   | 111.12 |
| SVN(deQSIIEIHK                        | 1266.6932 | IPI0023014E | IPI0023014E | yes | yes | 2,3   | 0.0011409   | 113.24 |
| SVKQEMNGTYVCHAFSSHGN(deVTR            | 2608.1911 | IPI0012297E | IPI0012297E | yes | no  | 3     | 0.0071596   | 71.735 |
| SVKQEMN(deGTYVCHAFSSHGNVTR            | 2608.1911 | IPI0012297E | IPI0012297E | yes | no  | 3     | 0.0071596   | 71.735 |
| SVIEN(deTTSYEEAKNTITK                 | 2027.0059 | IPI0012526E | IPI0012526E | yes | yes | 2,3   | 0           | 366.58 |
| SVIEN(deTTSYEEAK                      | 1469.6886 | IPI0012526E | IPI0012526E | yes | yes | 2     | 0.0021804   | 133.48 |
| SVGTGTNMVFNQNCSCIGSSGN(deSSAVIGICK    | 3091.3831 | IPI0062583E | IPI0062583E | yes | no  | 3     | 7.524E-31   | 130.78 |
| SVGTGTNMVFNQ(deCSCIGSSGNSSAVIGICK     | 3091.3831 | IPI0062583E | IPI0062583E | yes | no  | 3     | 7.524E-31   | 130.78 |
| SVAQN(deYSSITHIHSIGK                  | 1840.9432 | IPI00896674 | IPI00896674 | yes | yes | 2,3   | 1.0677E-06  | 131.45 |
| STTQTN(deSSDSHIVK                     | 1503.7165 | IPI00111807 | IPI00111807 | yes | no  | 2     | 0.0023451   | 90.444 |
| STN(deASFNIK                          | 980.49271 | IPI0022258E | IPI0022258E | yes | no  | 2     | 0.0030728   | 117.52 |
| STGKPTIYNVSI(deMSDTGGTCY              | 2364.0977 | IPI0046805E | IPI0046805E | yes | yes | 2,3   | 1.6384E-13E | 250.86 |
| STFQN(deVTVIIAVITQK                   | 1761.0036 | IPI0012177E | IPI0012177E | yes | yes | 2,3   | 2.3556E-18E | 238.07 |
| STEVSN(deHTIK                         | 1114.5619 | IPI0027269C | IPI0027269C | yes | no  | 2     | 0.0021113   | 107.03 |
| SSVEIIN(deSTQAPMR                     | 1531.7664 | IPI0012016E | IPI0012016E | yes | yes | 2,3   | 0.0009804   | 133.48 |
| SSTEN(deTSAEIHVIGR                    | 1599.7853 | IPI00330594 | IPI00330594 | yes | yes | 2,3   | 7.2133E-08  | 155.22 |
| SSSYHENDMENPQSN(deITMVYIPIGPK         | 3063.4318 | IPI0040660E | IPI0040660E | yes | yes | 3     | 4.2247E-26  | 132.36 |
| SSSHIPPSSYFN(deASGR                   | 1692.7856 | IPI00130661 | IPI00130661 | yes | yes | 2,3   | 5.361E-90   | 238.02 |
| SSQSN(deQTIWFGHFTTSTIMSPSPGIR         | 2866.3708 | IPI00226714 | IPI00226714 | yes | no  | 3     | 5.583E-26   | 149.32 |
| SSQSIIN(deSSNQK                       | 1291.6368 | IPI00621024 | IPI00621024 | yes | yes | 2     | 0.0025229   | 95.981 |
| SSGN(deSSAVIGICK                      | 1278.6238 | IPI0011495C | IPI0011495C | yes | yes | 2     | 0.0029934   | 91.62  |
| SSAN(deQSEFQQQIQK                     | 1621.7696 | IPI0099093E | IPI0099093E | yes | no  | 2,3   | 1.621E-86   | 235.22 |
| SRYPHKPE(deINSTTHPGADIK               | 2247.1396 | IPI0011420E | IPI0011420E | yes | yes | 2,3   | 5.6225E-10  | 136.26 |
| SRNTTVADTYN(deITDPEEFETEYPPFFESR      | 3357.495  | IPI0012022E | IPI0012022E | yes | no  | 3     | 6.3445E-06  | 81.974 |
| SRN(deTTVADTYNITDPEEFETEYPPFFESR      | 3357.495  | IPI0012022E | IPI0012022E | yes | no  | 3     | 6.3445E-06  | 81.974 |
| SRGYN(deSSQDIPSIVDFVK                 | 2124.0851 | IPI0012466E | IPI0012466E | yes | yes | 2,3   | 0.0023292   | 87.49  |
| SQSPSIMYTINGFVN(deK                   | 1784.8767 | IPI0040660E | IPI0040660E | yes | yes | 2,3   | 1.9572E-17  | 134.81 |
| SQNDKFN(deVSITVK                      | 1478.7729 | IPI00466371 | IPI01026704 | no  | no  | 2,3   | 8.6335E-33  | 199.31 |
| SQN(deDTVTPDVWYTSKPEKK                | 2222.0855 | IPI0047123E | IPI0047123E | yes | yes | 3     | 8.2478E-06  | 119.23 |
| SQIVN(deETHWQYYGTSDDR                 | 2183.9872 | IPI0074965E | IPI0074965E | yes | no  | 2,3   | 8.2137E-21  | 174.02 |
| SQITISNIDVNVDPGTYVCN(deATNAQGTR       | 3108.4782 | IPI0040849E | IPI0040849E | yes | no  | 2,3   | 1.7218E-56  | 185.7  |
| SQHIN(deSTDAADK                       | 1285.5899 | IPI0012833E | IPI0012833E | yes | yes | 2     | 0.0025337   | 95.651 |
| SQHIDN(deFSNQIGK                      | 1486.7165 | IPI0040660E | IPI0040660E | yes | yes | 2     | 1.6915E-05  | 105.46 |
| SQFVVSSN(deSSK                        | 1168.5724 | IPI0011481C | IPI0011481C | yes | yes | 2     | 0.0054874   | 85.554 |
| SPVR(deTEFNITSYSSK                    | 1714.8526 | IPI0085510E | IPI0085510E | yes | yes | 3     | 0.0061199   | 87.447 |
| SPVIIGQPNTIICFVDNIFPPVIN(deITWIR      | 3335.8104 | IPI0017203E | IPI0017203E | yes | no  | 3,4   | 0.0017668   | 57.738 |
| SPIQEN(deSSDSNKIAWEDFIGDEADEKTYNDVIFR | 3931.8024 | IPI0013329E | IPI0013329E | yes | no  | 4     | 0.0014338   | 55.884 |
| SPGAQDN(deVSVSQGMR                    | 1531.7049 | IPI0034858E | IPI0034858E | yes | no  | 2,3   | 0.0004022   | 114.7  |
| SPFYN(deISDQISFQCYDGYVIR              | 2571.174  | IPI0011406E | IPI0011406E | yes | no  | 3     | 3.0523E-05  | 113.47 |
| SPFIASVSDQHGVYITENKN(deK              | 2446.2492 | IPI0012432E | IPI0012432E | yes | no  | 3     | 0.013379    | 65.423 |
| SPDKETFTCWVNPGSDGGIPTN(deYSITYSK      | 3307.4768 | IPI00321091 | IPI00321091 | yes | no  | 3     | 0.0001497   | 76.161 |
| SPANGSIGPMIN(deISSGESR                | 1872.9    | IPI0011261E | IPI0011261E | yes | no  | 2     | 0.0001765   | 98.443 |
| SPAN(deGSIGPMINISSGESR                | 1872.9    | IPI0011261E | IPI0011261E | yes | no  | 2     | 0.0001765   | 98.443 |
| SNKYSQ(deAANSTKEIDDCEQANK             | 2500.1136 | IPI0018735E | IPI0018735E | yes | yes | 4     | 2.3628E-08  | 112.82 |
| SNKYSQ(deAANSTK                       | 1297.6262 | IPI0018735E | IPI0018735E | yes | yes | 2     | 0.0030521   | 122.34 |
| SNIDPSNVDSIFYAAQSSQVISGCEISVSN(deETK  | 3545.6468 | IPI00475154 | IPI00475154 | yes | yes | 3,4   | 3.1141E-06  | 73.389 |
| SNF(deTPATNEAPQATVFPK                 | 1918.9425 | IPI0017203E | IPI0017203E | yes | no  | 2     | 6.991E-11   | 151.41 |
| SNASDDPISISPGTPPPPIINN(deSTHR         | 2586.2674 | IPI0011825C | IPI0011825C | yes | yes | 3     | 0.014152    | 52.03  |
| SNASDDPISISPGTPPPPIIN(deNSTHR         | 2586.2674 | IPI0011825C | IPI0011825C | yes | yes | 3     | 0.014152    | 52.03  |
| SN(deYSVIDITPVAIIPK                   | 1800.0033 | IPI0022507E | IPI0022507E | yes | no  | 2,3   | 1.0696E-60  | 214.81 |
| SN(deVTRPSEFNWIWAPIPIFIK              | 2491.3264 | IPI0031950E | IPI0031950E | yes | no  | 2,3,4 | 1.8671E-14  | 137.14 |
| SN(deITVIR                            | 801.47085 | IPI0022951E | IPI0022951E | yes | no  | 2     | 0.0078227   | 105.57 |
| SN(deISIR                             | 801.47085 | IPI00323134 | IPI00323134 | yes | no  | 2     | 0.0031313   | 123.98 |
| SMANQIITFN(deISSK                     | 1552.7919 | IPI0046760C | IPI0046760C | yes | yes | 3     | 4.4739E-24  | 188.4  |
| SMAGSGHN(deVSQEAIAIKR                 | 1854.937  | IPI0031467E | IPI0031467E | yes | yes | 2,3,4 | 6.196E-06   | 122.01 |
| SMAGSGHN(deVSQEAIAIK                  | 1698.8359 | IPI0031467E | IPI0031467E | yes | yes | 2,3   | 3.3394E-11  | 158.98 |
| SKN(deITIVEIPDEVIVPR                  | 1921.0884 | IPI0011883C | IPI0011883C | yes | yes | 2,3   | 2.8088E-27  | 182.34 |
| SKIDTEVAN(deISVVMEEMK                 | 2022.0013 | IPI00129304 | IPI00129304 | yes | yes | 3     | 0.0002079   | 107.5  |
| SITVIIGAHN(deK                        | 1151.6663 | IPI0023042E | IPI0023042E | yes | yes | 2     | 7.2473E-11  | 161.62 |
| SITQGSIIVGNIAPVN(deGTSQGK             | 2140.1488 | IPI0051536C | IPI0051536C | yes | no  | 2,3   | 6.6654E-23E | 289.35 |
| SITHDTDGVAVFVINIPSN(deVTVIK           | 2538.3694 | IPI0033083E | IPI0033083E | yes | yes | 3     | 4.6809E-39  | 176.1  |
| SITFN(deESYQDVSEVVYGA                 | 2135.0059 | IPI0013664E | IPI0013664E | yes | yes | 2,3   | 0           | 317.58 |
| SISN(deSTAR                           | 834.41954 | IPI0011473E | IPI0011473E | yes | yes | 2     | 0.0048622   | 118.33 |
| SISEN(deATATTEPK                      | 1347.6518 | IPI0094409E | IPI0094409E | yes | no  | 2     | 2.9266E-70  | 227.63 |
| SISCQMAAFRGN(deGSER                   | 1769.7937 | IPI00129677 | IPI00129677 | yes | no  | 2,3   | 0.0045411   | 91.355 |
| SIQT(deTSDQQNIKVPGNITSVIISNIVPR       | 3021.6459 | IPI00221547 | IPI00221547 | yes | no  | 3     | 4.8959E-18  | 111.84 |
| SIPVN(deDSVIDVFERR                    | 1744.9108 | IPI0012212E | IPI0012212E | yes | no  | 2,3   | 2.5135E-07  | 151.07 |
| SIPVN(deDSVIDVFER                     | 1588.8097 | IPI0012212E | IPI0012212E | yes | no  | 2,3   | 7.8791E-07  | 154.46 |
| SIPQSSWGN(deWSSWK                     | 1648.7634 | IPI00118291 | IPI00118291 | yes | no  | 2     | 0.0021776   | 102.64 |
| SIPPGIFSTSAN(deISTIVIR                | 1972.0993 | IPI0012925C | IPI0012925C | yes | yes | 2,3   | 2.3376E-15  | 157.14 |
| SIPNN(deVTSFEVESIKPYK                 | 2051.0575 | IPI0032305E | IPI0032305E | yes | no  | 2,3   | 1.8748E-60  | 211.06 |
| SINGVIIPGGGAN(deITDSGYSR              | 2047.0334 | IPI0012924E | IPI0012924E | yes | no  | 2     | 1.5001E-11  | 128.98 |
| SIN(deVTGQGFSSIIQK                    | 1490.8093 | IPI0040574E | IPI0040574E | yes | no  | 2,3   | 2.4494E-86  | 233.02 |
| SIN(deGTFFGGWK                        | 1212.5928 | IPI0013693E | IPI0013693E | yes | yes | 2     | 0.0015831   | 101.93 |
| SIN(deCTVK                            | 820.41129 | IPI0041718C | IPI0041718C | yes | no  | 2     | 0.007312    | 109.11 |
| SIIW(deTETFMNKENQNHSYSIK              | 2569.2271 | IPI0012024E | IPI0012024E | yes | no  | 3     | 1.0941E-05  | 99.891 |
| SIIGSPTWKN(deVSR                      | 1669.9515 | IPI0022571E | IPI0022571E | yes | yes | 2,3   | 1.9125E-07  | 155.43 |
| SIIEFN(deTTMGCQPSDSQHR                | 2206.9736 | IPI00308971 | IPI00308971 | yes | yes | 2,3   | 3.2904E-25  | 177.44 |
| SIIDHIHVGVRDN(deVSQPK                 | 2070.097  | IPI0012342E | IPI0012342E | yes | no  | 2,3,4 | 1.7489E-18  | 161.35 |
| SIGPNTCSSN(deGSSYFIHGPNICYSSIDKINAAK  | 3834.7982 | IPI00128484 | IPI00128484 | yes | yes | 4     | 2.3996E-13  | 94.152 |
| SIGNVN(deFSVSAEAQQSSEPCGSEVATVPETGRK  | 3421.6056 | IPI0012322E | IPI0012322E | yes | yes | 3,4,5 | 4.3881E-88  | 203.79 |
| SIGEVN(deFTATAEAIQSPEICGNKITEVPAIVHK  | 3522.8028 | IPI0062466E | IPI0062466E | yes | yes | 4     | 1.7905E-11  | 95.823 |
| SIGEVN(deFTATAEAIQSPEICGNK            | 2435.1639 | IPI0062466E | IPI0062466E | yes | yes | 2,3,4 | 9.2767E-121 | 241.44 |
| SIFN(deFSSCKGQK                       | 1401.6711 | IPI00420867 | IPI00420867 | yes | no  | 3     | 0.010252    | 83     |
| SIFN(deFSSCK                          | 1088.4961 | IPI00420867 | IPI00420867 | yes | no  | 2     | 0.022692    | 80.763 |



|                                             |           |             |             |     |     |       |   |             |        |
|---------------------------------------------|-----------|-------------|-------------|-----|-----|-------|---|-------------|--------|
| SIFGAIPGN(deR                               | 1030.556  | IPI00400073 | IPI00400073 | yes | yes |       | 2 | 0.00041     | 123.63 |
| SIDNDNYVFTAPYFN(deK                         | 1906.8737 | IPI00626793 | IPI00626793 | yes | no  |       | 2 | 8.6627E-13  | 168.69 |
| SIDEEAIKEN(deNSIHWK                         | 1911.9327 | IPI00123223 | IPI00123223 | yes | no  | 2,3,4 |   | 3.9068E-46  | 209.67 |
| SIDAYPVINQAQAMEN(deHTEVHFQK                 | 2769.3181 | IPI00468674 | IPI00468674 | yes | no  | 3,4   |   | 9.2315E-16  | 122.49 |
| SICING(deKWDPEPNCTSK                        | 2004.9033 | IPI0013001C | IPI0013001C | yes | no  | 2,3   |   | 0.0008982   | 106.93 |
| SHTNTSHVMQYGN(deK                           | 1602.7209 | IPI00130627 | IPI00130627 | yes | yes | 2,3   |   | 8.2521E-16  | 173.19 |
| SHTN(deTSHVMQYGNK                           | 1602.7209 | IPI00130627 | IPI00130627 | yes | yes | 2,3   |   | 8.2521E-16  | 173.19 |
| SHPIHSPVN(deWTSYASSVESTPTK                  | 2511.203  | IPI00129215 | IPI00129215 | yes | yes |       | 3 | 1.901E-05   | 90.729 |
| SHGIWN(deNTVFIFSTDNGGQTR                    | 2350.1091 | IPI00652358 | IPI00652358 | yes | no  |       | 3 | 0.0012912   | 78.78  |
| SGTIFDNFIITNDEAYAEFFGN(deETWGVTK            | 3267.4884 | IPI00123639 | IPI00123639 | yes | yes | 3,4   |   | 1.5829E-56  | 185.84 |
| SGSEKWN(deFSVGHFEIR                         | 1878.9013 | IPI0013100C | IPI0013100C | yes | no  |       | 3 | 0.0067256   | 83.729 |
| SGQVEVN(deITEFPYTPPEHGR                     | 2357.1288 | IPI00311405 | IPI00311405 | yes | yes |       | 3 | 0.0036998   | 69.763 |
| SGQEDHYWIDVEKN(deQSAK                       | 2132.9763 | IPI00319509 | IPI00319509 | yes | no  | 2,3,4 |   | 4.5354E-109 | 243.86 |
| SGDASIN(deVTNIQISDIGTYQCK                   | 2383.1326 | IPI00270376 | IPI00270376 | yes | no  | 2,3   |   | 1.9832E-102 | 232.82 |
| SFWYHDMDDPKGHIIAQVA(deTNPQGITGTGNTTSEMDPshr | 4524.0863 | IPI00321375 | IPI00321375 | yes | no  |       | 4 | 0.057035    | 33.165 |
| SFTVN(deWTPPAGDWEHYR                        | 2061.9333 | IPI00229935 | IPI00229935 | yes | no  | 2,3   |   | 5.4401E-07  | 136.26 |
| SFQQSHVHVHDIQSFIDNIN(deMTHYIK               | 3194.5356 | IPI00626555 | IPI00626555 | yes | no  | 3,4,5 |   | 4.1264E-65  | 192.12 |
| SFPVYIN(deGSTVPSPVK                         | 1690.893  | IPI00229935 | IPI00229935 | yes | no  | 2,3   |   | 7.8259E-12  | 131.56 |
| SFMVN(deWTQSPGKVEKYR                        | 2056.02   | IPI00330632 | IPI00330632 | yes | no  |       | 3 | 0.0085666   | 91.207 |
| SFMVN(deWTQSPGKVEK                          | 1736.8556 | IPI00330632 | IPI00330632 | yes | no  | 2,3   |   | 2.9799E-11  | 162.81 |
| SFMVN(deWTQSPGK                             | 1380.6496 | IPI00330632 | IPI00330632 | yes | no  |       | 2 | 7.9557E-07  | 155.66 |
| SFIISIAAIHDN(deHTHSDIQVK                    | 2345.2128 | IPI00130624 | IPI00130624 | yes | yes | 3,4   |   | 1.6185E-11  | 128.69 |
| SFDCCGIFN(deITTR                            | 1702.7807 | IPI00132189 | IPI00132189 | yes | yes | 2,3   |   | 2.9364E-17  | 179.65 |
| SEYQK(deWECKNDTIFGIK                        | 2145.0201 | IPI00126186 | IPI00126186 | yes | yes | 2,3   |   | 3.7393E-30  | 178.51 |
| SEPQEYN(deVSIPHFVWPVNAISFR                  | 2744.3347 | IPI00117841 | IPI00117841 | yes | no  |       | 3 | 0.0003832   | 73.675 |
| SEHIVN(deFTVK                               | 1172.619  | IPI00330481 | IPI00330481 | yes | yes |       | 3 | 0.012372    | 81.771 |
| SEEIEFIGN(deSSIR                            | 1479.7205 | IPI00320618 | IPI00320618 | yes | yes |       | 2 | 6.1128E-07  | 158.52 |
| SDVIN(deITEQVQWVK                           | 1657.8675 | IPI00223987 | IPI00223987 | yes | yes |       | 2 | 1.9084E-07  | 159.13 |
| SDN(deGSYFCK                                | 1076.4233 | IPI00121254 | IPI00121254 | yes | yes |       | 2 | 0.0066525   | 105.86 |
| SDINPAN(deGSYPFQAIHQ                        | 2013.9657 | IPI0016573C | IPI0016573C | yes | yes | 2,3   |   | 3.0478E-48  | 200.77 |
| SDIN(deCSVMEATEEK                           | 1611.6756 | IPI00130015 | IPI00130015 | yes | no  |       | 2 | 9.535E-07   | 152.94 |
| SDIIVQTDATNPSVPIDPISVSN(deSSSQIIK           | 3400.7613 | IPI00128358 | IPI00128358 | yes | no  |       | 4 | 0.0009652   | 52.249 |
| SDGIPIAPCGAIANSIFN(deDSFSIWHQR              | 2972.4239 | IPI00221859 | IPI00221859 | yes | yes |       | 3 | 2.3536E-06  | 84.602 |
| SDFSQTMIFQAN(deTTR                          | 1745.8043 | IPI00114671 | IPI00114671 | yes | no  | 2,3   |   | 1.2361E-24  | 181.51 |
| SCVAITDAFPQN(deMSRR                         | 1851.872  | IPI00405742 | IPI00405742 | yes | no  |       | 3 | 0.039387    | 61.167 |
| SCVAITDAFPQN(deMSR                          | 1695.7709 | IPI00405742 | IPI00405742 | yes | no  | 2,3   |   | 1.1897E-07  | 151.44 |
| SCIN(deESAIDSR                              | 1250.5561 | IPI00461861 | IPI00461861 | yes | no  |       | 2 | 0.0003032   | 122.33 |
| SCHTAVGTSEGWNVPMGIYN(deQTGSCK               | 2953.3157 | IPI0047108C | IPI0047108C | yes | no  | 3,4   |   | 2.1805E-31  | 142.32 |
| SCGECIQAGPNCGWCTN(deTTFIQEGMPTSAR           | 3389.3992 | IPI00132474 | IPI00132474 | yes | yes |       | 4 | 1.9896E-16  | 104.38 |
| SAVSTSWIIPYN(deHTWSHEK                      | 2242.0807 | IPI00124428 | IPI00124428 | yes | yes | 2,3   |   | 8.6578E-25  | 172.91 |
| SAVFHRIEGITN(deETYR                         | 1891.9541 | IPI00119299 | IPI00119299 | yes | no  | 2,3   |   | 0.000326    | 126.48 |
| SAGN(deMSTYNCQIIK                           | 1585.7229 | IPI0013352C | IPI0013352C | yes | yes |       | 2 | 7.3571E-07  | 154.69 |
| SAEN(deFTVIIK                               | 1120.6128 | IPI00130271 | IPI00130271 | yes | no  |       | 2 | 0.0057967   | 95.477 |
| SAEGTFFIN(deKTK                             | 1341.6929 | IPI00125522 | IPI00125522 | yes | no  | 2,3   |   | 1.3984E-06  | 157.56 |
| SAEGTFFIN(deK                               | 1112.5502 | IPI00125522 | IPI00125522 | yes | no  |       | 2 | 0.0024682   | 104.82 |
| RYIKNG(deNATIIR                             | 1417.8154 | IPI00985828 | IPI00985828 | yes | no  |       | 2 | 0.01873     | 91.313 |
| RYIK(deNGNATIIR                             | 1417.8154 | IPI00985828 | IPI00985828 | yes | no  |       | 2 | 0.01873     | 91.313 |
| RYIEIG(deNETIIR                             | 1475.8096 | IPI00850057 | IPI00850057 | yes | no  | 2,3   |   | 1.4237E-103 | 244    |
| RVNDN(deKTAEEAIR                            | 1585.8172 | IPI00400016 | IPI00400016 | yes | no  | 2,3   |   | 4.3807E-10  | 166.62 |
| RVNASTTDP(deNSTVEQSAITR                     | 2146.0614 | IPI00338785 | IPI00338785 | yes | no  |       | 3 | 0.048901    | 54.964 |
| RSPGAQD(deNVSVSQGM                          | 1687.806  | IPI00348586 | IPI00348586 | yes | no  |       | 3 | 0.0035851   | 89.506 |
| RSN(deFTPATNEAPQATVFPK                      | 2075.0436 | IPI00172039 | IPI00172039 | yes | no  | 2,3   |   | 1.1131E-12  | 148.01 |
| RQDPVSWN(deKTFEDISR                         | 1976.9704 | IPI00848693 | IPI00848693 | yes | yes |       | 3 | 0.012082    | 89.911 |
| RQDPVSWN(deK                                | 1128.5676 | IPI00848693 | IPI00848693 | yes | yes |       | 2 | 0.032685    | 89.047 |
| RPYIVPIIWIN(deETGTIGDEKAEMFK                | 2919.5205 | IPI00331214 | IPI00331214 | yes | yes |       | 4 | 0.0020976   | 73.783 |
| RPYIVPIIWIN(deETGTIGDEK                     | 2313.2369 | IPI00331214 | IPI00331214 | yes | yes |       | 3 | 8.8006E-06  | 109.54 |
| RPFVVYEMEVDTIETTCHADPTPIAN(deCSVR           | 3676.7324 | IPI00128249 | IPI00128249 | yes | yes | 3,4   |   | 1.6309E-05  | 73.213 |
| RNPSANTFIHI(deNASSFR                        | 1930.9762 | IPI00315535 | IPI00315535 | yes | yes | 2,3   |   | 3.7885E-10  | 151.44 |
| RN(deWTETEVR                                | 1189.584  | IPI0013439C | IPI0013439C | yes | yes |       | 2 | 0.01547     | 101.97 |
| RN(deFTAADWGHSR                             | 1416.6647 | IPI00339885 | IPI00339885 | yes | no  | 2,3   |   | 0.0038038   | 106.17 |
| RMHI(deNGSNVQVIHR                           | 1659.874  | IPI00119063 | IPI00119063 | yes | yes | 2,3,4 |   | 2.6363E-32  | 192.14 |
| RMEISVGAIQAN(deR                            | 1443.7616 | IPI00108811 | IPI00108811 | yes | yes | 2,3   |   | 0.0050259   | 131.17 |
| RIQEGHEYDTFDIN(deDTAQCFK                    | 2687.1922 | IPI00400073 | IPI00400073 | yes | yes |       | 3 | 1.0112E-17  | 141.07 |
| RIPVTN(deISQIHK                             | 1404.8201 | IPI00469426 | IPI00469426 | yes | no  |       | 3 | 0.0091088   | 80.69  |
| RIGAIN(deNSIIIEDR                           | 1695.9632 | IPI00115516 | IPI00115516 | yes | no  |       | 3 | 0.0032465   | 93.478 |
| RIAVDWESIGYN(deITR                          | 1791.9268 | IPI0012304C | IPI0012304C | yes | no  |       | 3 | 2.2703E-07  | 151.99 |
| RHEEGHMIN(deCTCFGQGR                        | 2087.8836 | IPI00113539 | IPI00113539 | yes | no  | 2,3   |   | 1.114E-05   | 125.5  |
| RGVFITN(deETGQPIIGK                         | 1728.9523 | IPI0011196C | IPI0011196C | yes | no  | 2,3   |   | 8.4858E-35  | 198.85 |
| RGFTDCAIAN(deMTQQIR                         | 1981.9462 | IPI00621027 | IPI00621027 | yes | no  | 2,3   |   | 2.1624E-12  | 128.74 |
| RGPECSQN(deYTAPTGVK                         | 1876.9101 | IPI00123996 | IPI00123996 | yes | yes | 2,3   |   | 2.6825E-14  | 163.56 |
| RGDDIYTN(deVTVSIVEAIVGFEMDITHIDGHK          | 3443.7031 | IPI00320241 | IPI00320241 | yes | yes |       | 4 | 0.057351    | 38.925 |
| RGCKDN(deATDSVPIR                           | 1587.7787 | IPI00119063 | IPI00119063 | yes | yes | 2,3   |   | 0.015211    | 90.793 |
| RFHSDIN(deISESIIPAVIEK                      | 2167.1637 | IPI00831484 | IPI00831484 | yes | yes |       | 3 | 0.0010418   | 89.358 |
| RFANEYP(deNITR                              | 1379.6946 | IPI00130573 | IPI00130573 | yes | yes |       | 2 | 0.062362    | 63.727 |
| RDQGN(deVTDMASMK                            | 1451.6497 | IPI00471081 | IPI00471081 | yes | yes | 2,3   |   | 9.6825E-16  | 172.76 |
| RDDYRPTWTI(deNQTEPVAGNYYPVNTR               | 3125.4955 | IPI00381303 | IPI00381303 | yes | yes |       | 3 | 1.2313E-05  | 88.627 |
| RDDIHPTIPAGQYFIN(deITYNYPVHSFDGR            | 3405.6531 | IPI00387318 | IPI00387318 | yes | no  | 3,4   |   | 4.9427E-19  | 118.24 |
| RAN(deASTFAVPSPVNSADTR                      | 2047.0083 | IPI00119065 | IPI00119065 | yes | yes | 2,3   |   | 0.0016381   | 85.203 |
| RADIN(deGSNMETVIGHGIK                       | 1910.9632 | IPI00411145 | IPI00411145 | yes | no  |       | 3 | 0.0001119   | 111.22 |
| QYDSFTFTASRN(deGTYK                         | 1884.8642 | IPI00134378 | IPI00134378 | yes | no  | 2,3   |   | 9.0794E-08  | 153.22 |
| QYCTEQN(deATIVK                             | 1453.6871 | IPI00123658 | IPI00123658 | yes | no  |       | 2 | 0.0013169   | 115.34 |
| QVVEN(deMTR                                 | 975.48076 | IPI0011196C | IPI0011196C | yes | no  |       | 2 | 0.014527    | 97.431 |
| QVTPIFFYFQN(deR                             | 1558.7932 | IPI00319509 | IPI00319509 | yes | no  | 2,3   |   | 0.0010868   | 127.37 |
| QVSTIIN(deNTDK                              | 1231.6408 | IPI0039684C | IPI0039684C | yes | no  |       | 2 | 0.0003106   | 123.95 |
| QVN(deGSVSGSQWNK                            | 1389.6637 | IPI0040885C | IPI0040885C | yes | yes |       | 2 | 0.0036703   | 97.463 |
| QVEIIEYPYHEQIAVVAPEIITGHN(deYTIK            | 3463.8028 | IPI00223987 | IPI00223987 | yes | yes | 3,4   |   | 3.057E-54   | 169.28 |

|                                         |           |             |             |     |     |       |            |        |
|-----------------------------------------|-----------|-------------|-------------|-----|-----|-------|------------|--------|
| QVEEIVN(deHTGIR                         | 1506.8154 | IPI00263041 | IPI00263041 | yes | yes | 2,3   | 0.0032485  | 103.76 |
| QVAIQTFGN(deQTSIIPAGGAGYK               | 2220.1539 | IPI0022871  | IPI0022871  | yes | yes | 2,3,4 | 0          | 356.04 |
| QTTAMDFSAN(deETVCVWHVGDSSAAQTQIK        | 3257.4758 | IPI0011906  | IPI0011906  | yes | no  | 3,4   | 0.0081183  | 57.432 |
| QTQVGIVQYGAN(deVTHEFNINIK               | 2359.1921 | IPI00466371 | IPI01026704 | no  | no  | 2,3   | 1.0814E-47 | 192.09 |
| QTPEYQN(deR                             | 1034.4781 | IPI0015405  | IPI0015405  | yes | no  | 2     | 0.014885   | 97.635 |
| QTIFFN(deGTR                            | 1082.5509 | IPI0015384  | IPI0015384  | yes | yes | 2     | 0.010382   | 98.04  |
| QTGDVTCN(deCTDGR                        | 1482.5827 | IPI0011906  | IPI0011906  | yes | yes | 2     | 0.0073059  | 76.262 |
| QSVGQN(deYSNVIAHIR                      | 1684.8645 | IPI00112271 | IPI00112271 | yes | yes | 3     | 1.0184E-07 | 152.99 |
| QSQPVHIIPMNETDHINMVFSN(deK              | 2678.2945 | IPI0013350  | IPI0013350  | yes | yes | 3,4   | 9.2848E-16 | 136.68 |
| QSQPVHIIPMN(deETDHINMVFSNK              | 2678.2945 | IPI0013350  | IPI0013350  | yes | yes | 3,4   | 9.2848E-16 | 136.68 |
| QSN(deGSAIVISSIAGK                      | 1430.7729 | IPI0011559  | IPI0011559  | yes | no  | 2,3   | 9.0879E-60 | 176.21 |
| QSINTVN(deDTVVK                         | 1403.7045 | IPI00420867 | IPI00420867 | yes | yes | 2     | 0.0008388  | 135.02 |
| QSDYCWEIAPHMYFITPGQQPQPITNIIIVN(deKTGAK | 4255.1235 | IPI0032257  | IPI0032257  | yes | no  | 4     | 1.3473E-06 | 63.776 |
| QSDYCWEIAPHMYFITPGQQPQPITNIIIVN(deK     | 3897.9222 | IPI0032257  | IPI0032257  | yes | no  | 4     | 0.0003507  | 56.156 |
| QRYN(deITAK                             | 992.54033 | IPI00130661 | IPI00130661 | yes | yes | 2     | 2.654E-05  | 138.4  |
| QRYEDIVIN(deETINK                       | 1733.8948 | IPI00285117 | IPI00285117 | yes | no  | 2,3   | 0.0038168  | 120.87 |
| QQTECMVQQYSN(deYSVNGEPVNGR              | 2687.1704 | IPI0039684  | IPI0039684  | yes | no  | 3     | 7.8348E-05 | 86.625 |
| QQCIEEAQIEN(deETTGCSSK                  | 2123.9099 | IPI00128984 | IPI00128984 | yes | yes | 2,3   | 1.5521E-11 | 158.58 |
| QPIYIN(deCSCVTGGSASAK                   | 1911.8819 | IPI0030924  | IPI0030924  | yes | yes | 2     | 3.1003E-28 | 183.6  |
| QNPMTIGNVVI(deFDKVITNQESPYQNHTGR        | 3299.6357 | IPI0012531  | IPI0012531  | yes | no  | 3,4   | 1.2336E-13 | 103.03 |
| QNFSN(deITVSTEDQVK                      | 1708.8268 | IPI00129677 | IPI00129677 | yes | no  | 2,3   | 1.2525E-57 | 216.71 |
| QNAQDVIIKTN(deATK                       | 1542.8366 | IPI0033878  | IPI0033878  | yes | no  | 2,3   | 0.0037636  | 112.17 |
| QN(deFSNITVSTEDQVK                      | 1708.8268 | IPI00129677 | IPI00129677 | yes | no  | 2,3   | 1.2525E-57 | 216.71 |
| QKNVNIYSIVN(deDSFFPQRPEK                | 2522.2918 | IPI00122557 | IPI00122557 | yes | no  | 3,4   | 1.102E-37  | 183.74 |
| QKNVN(deISYIVNDSFFPQRPEK                | 2522.2918 | IPI00122557 | IPI00122557 | yes | no  | 3,4   | 1.102E-37  | 183.74 |
| QKNITAFN(deETIFR                        | 1580.8311 | IPI0012470  | IPI0012470  | yes | yes | 3     | 0.022834   | 75.479 |
| QIYPYN(deSSNR                           | 1240.5836 | IPI0022982  | IPI0022982  | yes | yes | 2     | 0.015124   | 79.148 |
| QIYN(deITVR                             | 1005.5607 | IPI00623114 | IPI00623114 | yes | no  | 1,2   | 9.6091E-06 | 141.78 |
| QIWDWSKHN(deITITQGK                     | 1954.0061 | IPI0012835  | IPI0012835  | yes | no  | 2     | 0.0002196  | 130.29 |
| QINPPHTAN(deSSITSK                      | 1593.8111 | IPI0098839  | IPI0098839  | yes | yes | 2,3   | 0.0006684  | 106.32 |
| QINNGEIQPISEN(deTTITFMSTK               | 2465.2108 | IPI00126834 | IPI00126834 | yes | no  | 3     | 2.4761E-48 | 150.69 |
| QINAYN(deR                              | 877.44061 | IPI0047319  | IPI0047319  | yes | no  | 2     | 0.0060872  | 114.02 |
| QIN(deITTEDDDIYHMTVPYGRPR               | 2633.2544 | IPI00265291 | IPI00265291 | yes | yes | 3     | 2.1149E-11 | 129.12 |
| QIN(deISIVK                             | 1026.6437 | IPI0011511  | IPI0011511  | yes | yes | 2     | 0.002456   | 119.53 |
| QIN(deISDSIAVIGIAKPAHIYSK               | 2337.3056 | IPI00463492 | IPI00463492 | yes | yes | 3,4   | 2.3333E-06 | 100.92 |
| QIN(deISDSIAVIGIAK                      | 1540.8825 | IPI00463492 | IPI00463492 | yes | yes | 2     | 6.8199E-18 | 178.23 |
| QIITEEKIPN(deNTQWITWSPEGHKIAYVVK        | 3508.8143 | IPI0012581  | IPI0012581  | yes | no  | 4     | 3.1974E-18 | 115.5  |
| QIITEEKIPN(deNTQWITWSPEGHK              | 2748.3871 | IPI0012581  | IPI0012581  | yes | no  | 2,3,4 | 3.3148E-17 | 257.73 |
| QIIQTQVAPAIHPPVSYN(deDTAPR              | 2602.3503 | IPI0012898  | IPI0012898  | yes | no  | 3     | 1.3696E-55 | 190.67 |
| QIINAIQIN(deNTAVGHAIVIPARR              | 2481.4292 | IPI0083074  | IPI0083074  | yes | yes | 3,4   | 0.0079252  | 73.928 |
| QIINAIQIN(deNTAVGHAIVIPAR               | 2325.3281 | IPI0083074  | IPI0083074  | yes | yes | 3     | 8.2155E-11 | 161.99 |
| QIIN(deISQIVYGPEGSDIVIHK                | 2298.2835 | IPI0011650  | IPI0011650  | yes | no  | 2,3   | 5.441E-09  | 113.63 |
| QIIAN(deNSIR                            | 1140.6615 | IPI00128024 | IPI00128024 | yes | yes | 2     | 0.0005311  | 121.36 |
| QIIAN(deSSAIEETIIGHQGR                  | 2036.0651 | IPI0011691  | IPI0011691  | yes | no  | 2,3   | 9.244E-53  | 205.98 |
| QIGCADN(deGTVKPIPSDK                    | 1798.8883 | IPI0076010  | IPI0076010  | yes | no  | 2,3   | 4.9872E-06 | 130.21 |
| QIGASPSDDIIFGVFAQSKPDSAEPVN(deR         | 2944.4567 | IPI0013042  | IPI0013042  | yes | no  | 3,4   | 1.8754E-31 | 146.76 |
| QIFFN(deGTETIR                          | 1324.6776 | IPI0033820  | IPI0033820  | yes | no  | 2     | 0.0021719  | 98.898 |
| QHTVTTTTKGEN(deFTETDVK                  | 2136.0335 | IPI0012079  | IPI0012079  | yes | yes | 2     | 0.008845   | 73.448 |
| QHGQFSIAVVGIN(deITSIGIR                 | 2109.1695 | IPI0012119  | IPI0012119  | yes | no  | 3     | 6.7358E-06 | 107.03 |
| QGPQAGGTTITIN(deGTHIDTGSKEDVR           | 2652.3103 | IPI0040574  | IPI0040574  | yes | no  | 3,4   | 3.8207E-33 | 161.02 |
| QGPQAGGTTITIN(deGTHIDTGSK               | 2153.0713 | IPI0040574  | IPI0040574  | yes | no  | 2,3   | 2.3854E-16 | 260.06 |
| QGEAIQKFQIIIRN(deISVVVATHSPTIAK         | 3301.8874 | IPI0022141  | IPI0022141  | yes | no  | 4     | 0.0005651  | 64.779 |
| QGDQYSCMVGHEAIPMN(deFTQK                | 2440.061  | IPI0096897  | IPI0096897  | yes | no  | 2,3,4 | 7.2493E-19 | 149.52 |
| QFWIFDVQNPDDVAKN(deSSK                  | 2237.0753 | IPI00331214 | IPI00331214 | yes | yes | 2,3   | 1.4267E-14 | 152.94 |
| QFFN(deASVQFDNMDPIIDYINQR               | 2674.2486 | IPI0011784  | IPI0011784  | yes | yes | 3     | 8.5003E-32 | 178.72 |
| QEVMFITNVN(deSSSSSTQIYQAVSR             | 2675.2861 | IPI00112614 | IPI00112614 | yes | yes | 3     | 1.4201E-46 | 185.71 |
| QEMNGTYVCHAFSSHGN(de)VTR                | 2293.9957 | IPI0012297  | IPI0012297  | yes | no  | 3     | 0.0074829  | 73.138 |
| QEMNGTY(deVCHAFSSHGNVTR                 | 2293.9957 | IPI0012297  | IPI0012297  | yes | no  | 3     | 0.0074829  | 73.138 |
| QEIN(deDSIQVAER                         | 1400.6896 | IPI0032042  | IPI0032042  | yes | yes | 2     | 7.4999E-07 | 156.08 |
| QDPVSWNK(deTFEDISR                      | 1820.8693 | IPI0084869  | IPI0084869  | yes | yes | 3     | 0.033913   | 68.034 |
| QDIAISGN(deISSIYAMTQDK                  | 2053.999  | IPI0040574  | IPI0040574  | yes | no  | 2,3   | 9.4218E-20 | 282.72 |
| QAWAIVGVIDGGSSSCN(deESVR                | 2191.0328 | IPI00463492 | IPI00463492 | yes | yes | 3     | 1.3848E-05 | 96.143 |
| QASSPN(deSSTAQQQTATTQASMNIATTSAAQIISR   | 3450.6645 | IPI0038077  | IPI0038077  | yes | no  | 3     | 0.011426   | 51.321 |
| QAIQTMQSEFFYITNIIIN(deDTIEIR            | 2988.4903 | IPI0011813  | IPI0011813  | yes | yes | 2,3   | 4.7812E-67 | 204.31 |
| PNIIIVITDDQDVEIGSMQVMN(deK              | 2571.2924 | IPI0026803  | IPI0026803  | yes | yes | 3     | 0.016014   | 54.225 |
| NYTANATSSREEAWDY(deVQAQVK               | 2530.1724 | IPI0010809  | IPI0010809  | yes | no  | 2,3   | 7.2953E-08 | 103.66 |
| NYTANATSSREE(deAWDYVQAQVK               | 2530.1724 | IPI0010809  | IPI0010809  | yes | no  | 2,3   | 7.2953E-08 | 103.66 |
| NYN(deFTIACNTR                          | 1500.7143 | IPI0032257  | IPI0032257  | yes | no  | 2     | 0.0049593  | 100.19 |
| NYN(deFTIACNTR                          | 1344.6132 | IPI0032257  | IPI0032257  | yes | no  | 2,3   | 1.402E-23  | 182.1  |
| NYKNPN(deITISFTAER                      | 1766.8951 | IPI0013260  | IPI0013260  | yes | no  | 2,3   | 1.2767E-06 | 113.53 |
| NYFHYN(deQSFPSPSYNIK                    | 2017.9323 | IPI0012926  | IPI0012926  | yes | yes | 2,3   | 1.027E-17  | 170.78 |
| NYEVQIFHVN(deATVTEEGTGIEFSR             | 2739.314  | IPI0012322  | IPI0012322  | yes | yes | 2,3,4 | 0          | 318.66 |
| NVTVV(deIR                              | 799.49159 | IPI0046921  | IPI0046921  | yes | yes | 2     | 0.007709   | 106.36 |
| NVPGEIGINYN(deITADVAQK                  | 2015.0324 | IPI00130117 | IPI00130117 | yes | yes | 3     | 1.5974E-12 | 142.94 |
| NVNISYTVN(deDSFFPQRQPK                  | 2253.1178 | IPI0038117  | IPI0038117  | yes | yes | 2,3,4 | 2.5524E-20 | 283.31 |
| NVNISYIVNDS(deFFPQRPEK                  | 2266.1382 | IPI00122557 | IPI00122557 | yes | no  | 2,3,4 | 8.7255E-60 | 192.6  |
| NVNIS(deYIVNDSFFPQRPEK                  | 2266.1382 | IPI00122557 | IPI00122557 | yes | no  | 2,3,4 | 8.7255E-60 | 192.6  |
| NVN(deMSVICPTTIR                        | 1503.7538 | IPI00129867 | IPI00129867 | yes | no  | 2     | 0.0025999  | 127.71 |
| NVN(deISYTVNDSFFPQRQPK                  | 2253.1178 | IPI0038117  | IPI0038117  | yes | yes | 2,3,4 | 2.5524E-20 | 283.31 |
| NVITNQTINN(deDTVASSFIK                  | 2078.0644 | IPI00471264 | IPI00471264 | yes | no  | 3     | 1.4219E-06 | 119.08 |
| NVITN(deQTINNDTVASSFIK                  | 2078.0644 | IPI00471264 | IPI00471264 | yes | no  | 3     | 1.4219E-06 | 119.08 |
| NVIIWGN(deHSSTQYDPVNHAK                 | 2279.1083 | IPI00336324 | IPI00336324 | yes | yes | 3     | 3.7215E-15 | 157.11 |
| NVAIVAGDTGN(deATGIGEQGPTR               | 2097.0451 | IPI0012227  | IPI0012227  | yes | no  | 2,3   | 2.1224E-16 | 261.06 |
| NTQADVNASWSVISN(deSTRHEIER              | 2726.3372 | IPI0013218  | IPI0013218  | yes | yes | 3,4   | 5.3865E-24 | 141.6  |
| NTQADVNASWSVISN(deSTR                   | 2062.0079 | IPI0013218  | IPI0013218  | yes | yes | 2,3   | 7.4791E-15 | 263.55 |
| NTQADVIN(deASWSVISNSTRHEIER             | 2726.3372 | IPI0013218  | IPI0013218  | yes | yes | 3,4   | 5.3865E-24 | 141.6  |

|                                            |           |             |             |     |     |     |              |        |
|--------------------------------------------|-----------|-------------|-------------|-----|-----|-----|--------------|--------|
| NTQADVIN(deASWSVISNSTR                     | 2062.0079 | IPI0013218€ | IPI0013218€ | yes | yes | 2,3 | 7.4791E-15€  | 263.55 |
| NTGEIN(deITSIIDREETPYFIITGYAIDSR           | 3300.6514 | IPI0011579€ | IPI0011579€ | yes | no  |     | 3 8.73E-10   | 92.275 |
| NTDKENPYIGIGN(deYTICR                      | 2127.0055 | IPI0046823€ | IPI0046823€ | yes | no  | 2,3 | 0.0001324    | 113.01 |
| NTAFNITCQAVGPPEPVNIFVWQN(deSSR             | 3045.4767 | IPI00121254 | IPI00121254 | yes | yes |     | 3 2.6795E-26 | 137.52 |
| NTAFN(deITCQAVGPPEPVNIFVWQNSSR             | 3045.4767 | IPI00121254 | IPI00121254 | yes | yes |     | 3 2.6795E-26 | 137.52 |
| NSQFDMN(deSTDIAIK                          | 1582.7297 | IPI0034606€ | IPI0034606€ | yes | yes |     | 2 0.0013415  | 119.54 |
| NSNSN(deVIQVDQSGIGIPSRDYYINKTENEK          | 3381.6437 | IPI0039684€ | IPI0039684€ | yes | no  | 3,4 | 9.736E-05    | 75.71  |
| NSKYNYTI(deSINGK                           | 1663.8206 | IPI0022142€ | IPI0022142€ | yes | yes |     | 3 0.034934   | 89.43  |
| NSK(deYYNYTISINGK                          | 1663.8206 | IPI0022142€ | IPI0022142€ | yes | yes |     | 3 0.034934   | 89.43  |
| NQSVGDP(deNVDIIR                           | 1425.7212 | IPI00127447 | IPI00127447 | yes | yes |     | 2 0.0035693  | 96.591 |
| NQN(deSTCIGTDINR                           | 1491.6736 | IPI0012631€ | IPI0012631€ | yes | yes |     | 2 0.014091   | 69.716 |
| NQKDEIN(deETDIK                            | 1445.6998 | IPI0093088€ | IPI0093088€ | yes | no  |     | 2 0.014423   | 79.875 |
| NQIVEI(deEKVVIHPNHSVVDIGIIK                | 2692.5276 | IPI0040914€ | IPI0040914€ | yes | yes |     | 3 2.7178E-15 | 122.19 |
| NPSANTFIHIN(deASSFR                        | 1774.8751 | IPI0031553€ | IPI0031553€ | yes | yes | 2,3 | 0.0001994    | 117.67 |
| NPNN(deNTIHPNIR                            | 1402.7066 | IPI0031950€ | IPI0031950€ | yes | no  | 2,3 | 7.9076E-09   | 136.38 |
| NPIGQAQSAVVIN(deVTER                       | 1794.9588 | IPI0011929€ | IPI0011929€ | yes | no  | 2,3 | 1.7933E-59   | 166.76 |
| NPCTSEQN(deCTSPFSYK                        | 1918.7826 | IPI00132474 | IPI00132474 | yes | yes | 2,3 | 3.6897E-08   | 152.32 |
| NNQTECFNHV(deR                             | 1417.6157 | IPI0012466€ | IPI0012466€ | yes | no  |     | 2 0.0061722  | 83.182 |
| NNQT(deECFNHVR                             | 1417.6157 | IPI0012466€ | IPI0012466€ | yes | no  |     | 2 0.0061722  | 83.182 |
| NNGAGYF(deIEHIAFK                          | 1579.7783 | IPI0011188€ | IPI0011188€ | yes | no  |     | 2 0.055287   | 52.527 |
| NMICQWDPGRETYIETN(deYTIK                   | 2631.2098 | IPI0012015€ | IPI0012015€ | yes | yes |     | 3 9.8061E-09 | 116.13 |
| NKNPQMN(deFTEANEACK                        | 1894.8302 | IPI0030824€ | IPI0030824€ | yes | yes |     | 3 0.0007427  | 110.77 |
| NKANIQFGEN(deGTTISAVTNK                    | 2106.0705 | IPI00127447 | IPI00127447 | yes | yes | 2,3 | 9.709E-155   | 263.55 |
| NITVIEPVTQPFIVQTN(de)TTVK                  | 2341.2893 | IPI0010853€ | IPI0010853€ | yes | no  | 2,3 | 1.3826E-14   | 132.79 |
| NITVI(deEPVTQPFIVQTN)TTVK                  | 2341.2893 | IPI0010853€ | IPI0010853€ | yes | no  | 2,3 | 1.3826E-14   | 132.79 |
| NITAFNET(deIFR                             | 1324.6776 | IPI0012470€ | IPI0012470€ | yes | yes |     | 2 0.0001353  | 138.45 |
| NIQVYN(deATSNSITVK                         | 1650.8577 | IPI0012143€ | IPI0012143€ | yes | no  |     | 2 2.3853E-05 | 140.96 |
| NIQAVNEIATISQCN(deDTSSAAMVQCIR             | 3106.4846 | IPI0013834€ | IPI0013834€ | yes | no  | 3,4 | 2.3937E-26   | 135.76 |
| NIPWYVIAGNHDHIGN(deVSAQIAYSK               | 2766.3878 | IPI00137491 | IPI00137491 | yes | yes | 3,4 | 0.003749     | 60.991 |
| NIN(deVTSIGFR                              | 1119.6037 | IPI00468814 | IPI00468814 | yes | yes |     | 2 0.009691   | 87.298 |
| NIMTIVHFYN(deK                             | 1378.7067 | IPI0011982€ | IPI0011982€ | yes | no  |     | 2 0.0029716  | 94.767 |
| NIMIDIQKDTAV(deEGEEIEVNCTAMASKPATTIR       | 3647.7845 | IPI0085672€ | IPI0085672€ | yes | no  |     | 4 0.0013731  | 56.903 |
| NIKEE(deKANVVASAIQIPQK                     | 2150.2059 | IPI0015314€ | IPI0015314€ | yes | yes |     | 3 2.3302E-12 | 147.09 |
| NIIPTMN(deGSCTFHK                          | 1618.7596 | IPI00130271 | IPI00130271 | yes | no  |     | 3 0.0082609  | 72.089 |
| NIIPN(deITTSYIK                            | 1375.7711 | IPI0047108€ | IPI0047108€ | yes | no  |     | 2 0.0026085  | 93.345 |
| NIINDYVSN(deQTQGMKEIIEIDER                 | 2921.4441 | IPI0013183€ | IPI0013183€ | yes | no  | 3,4 | 2.1287E-19   | 134.32 |
| NIINDYVSN(deQTQGMK                         | 1836.904  | IPI0013183€ | IPI0013183€ | yes | no  | 2,3 | 6.5092E-12€  | 250.52 |
| NIIGIDENFVIN(deSSTEHR                      | 2057.0178 | IPI0040660€ | IPI0040660€ | yes | yes | 2,3 | 2.0166E-75   | 223.11 |
| NIGPN(deTTSTTITSDDFKPGVR                   | 2220.1022 | IPI00118291 | IPI00118291 | yes | no  |     | 3 5.9244E-05 | 93.226 |
| NIGN(deTSEGPR                              | 1043.4996 | IPI0022170€ | IPI0022170€ | yes | yes |     | 2 0.0028397  | 102.53 |
| NIGGIETEDDYGYQGHVQTCN(deFSAQMAK            | 3132.3553 | IPI0012676€ | IPI0012676€ | yes | yes | 3,4 | 8.6247E-27   | 139.04 |
| NIGFN(deCTTSQGK                            | 1325.6034 | IPI00224294 | IPI00224294 | yes | yes |     | 2 0.0034809  | 84.892 |
| NIFIN(deHSETASAK                           | 1430.7154 | IPI0040914€ | IPI0040914€ | yes | yes | 2,3 | 4.2504E-32   | 190.27 |
| NIADQGN(deQTAAIK                           | 1342.6841 | IPI0045870€ | IPI0045870€ | yes | no  |     | 2 0.0027411  | 130.2  |
| NI(deTSPVGVQPIINEHTFCAGITK                 | 2495.2842 | IPI0040914€ | IPI0040914€ | yes | yes |     | 3 5.1478E-06 | 92.563 |
| NHFTVAQAEAFN(deK                           | 1475.7157 | IPI0062611€ | IPI0062611€ | yes | yes |     | 2 0.0051102  | 79.466 |
| NGNATI(deIR                                | 857.47191 | IPI0098582€ | IPI0010999€ | no  | no  |     | 2 1.6082E-17 | 131.5  |
| NGNATI(deIR                                | 857.47191 | IPI0098582€ | IPI0010999€ | no  | no  |     | 2 1.6082E-17 | 131.5  |
| NGNA(deTIIR                                | 857.47191 | IPI0098582€ | IPI0010999€ | no  | no  |     | 2 1.6082E-17 | 131.5  |
| NGNA(deTIIR                                | 857.47191 | IPI0098582€ | IPI0010999€ | no  | no  |     | 2 1.6082E-17 | 131.5  |
| NGIYN(deITVIAIDADGR                        | 1703.8842 | IPI0013820€ | IPI0013820€ | yes | no  | 2,3 | 1.7403E-09   | 160.25 |
| NGIPDEQIIVMMYDDIANSEENPTPGVVINRPN(deGTDVYK | 4317.057  | IPI00130627 | IPI00130627 | yes | yes |     | 4 1.358E-07  | 65.883 |
| NGIASGSGN(deCSTGPNGDGSFHAWSIIEVK           | 2918.3253 | IPI00322497 | IPI00322497 | yes | yes |     | 3 1.1877E-42 | 166.65 |
| NGHITN(deYTVVYR                            | 1435.7208 | IPI00110264 | IPI00110264 | yes | yes |     | 2 0.010489   | 73.466 |
| NGDAYGYYN(de)DSIK                          | 1478.6314 | IPI00471081 | IPI00471081 | yes | yes |     | 2 0.0027768  | 115.91 |
| NGDAYG(deYYNDSIK                           | 1478.6314 | IPI00471081 | IPI00471081 | yes | yes |     | 2 0.0027768  | 115.91 |
| NFVIN(deMTCR                               | 1153.5372 | IPI00222321 | IPI00222321 | yes | no  |     | 2 0.013802   | 92.538 |
| NFN(deDSIHSISQAIR                          | 1600.7958 | IPI00263041 | IPI00263041 | yes | yes |     | 2 0.0022437  | 93.823 |
| NF(deTAADWGHRSR                            | 1260.5636 | IPI0033988€ | IPI0033988€ | yes | no  |     | 2 0.042949   | 59.57  |
| NF(deNVEKINGEWHTIIIASDKR                   | 2483.2921 | IPI0096896€ | IPI0094471€ | no  | no  |     | 3 0.0090137  | 77.969 |
| NEIMIN(deSSIMR                             | 1306.6373 | IPI0037869€ | IPI0037869€ | yes | no  |     | 2 0.02908    | 59.155 |
| NEEVKN(deMSVEINSK                          | 1619.7825 | IPI0012820€ | IPI0012820€ | yes | yes |     | 2 0.0155     | 77.068 |
| NDTGPYVCET(deR                             | 1310.5561 | IPI0010853€ | IPI0010853€ | yes | no  |     | 2 0.0003038  | 122.46 |
| NDRN(deISDEIFIR                            | 1490.7478 | IPI0031180€ | IPI0031180€ | yes | no  |     | 2 0.015203   | 79.492 |
| NCKPIIDN(deVSFFGVK                         | 1849.976  | IPI00122581 | IPI00122581 | yes | no  |     | 3 0.000326   | 126.48 |
| NAVN(deCTYKNEDDCVVR                        | 1955.8466 | IPI00266264 | IPI00266264 | yes | yes |     | 2 0.0030276  | 97.836 |
| NATIAEQAKI(dePATEKPVIIISK                  | 2221.2682 | IPI0012334€ | IPI0012334€ | yes | yes |     | 3 3.6458E-21 | 159.81 |
| NAN(deCSTVSPGQTQCTCQK                      | 2039.8459 | IPI0046760€ | IPI0046760€ | yes | yes | 2,3 | 0.0090432    | 66.436 |
| NAIQAFGN(deGTDVNMSPK                       | 1762.8308 | IPI0011635€ | IPI0011635€ | yes | no  | 2,3 | 8.1226E-28   | 183.74 |
| NAIQAFGN(deGSDVTMWQPAPPVQTTTATTTAFR        | 3479.678  | IPI00128641 | IPI00128641 | yes | no  |     | 4 0.0001565  | 59.567 |
| NAIN(deITFHAQNIPEGGAYEAEIR                 | 2487.2142 | IPI0011597€ | IPI0011597€ | yes | yes |     | 3 0.0004892  | 90.22  |
| NAIKEGDNITIQ(deCIGNGNPPPEEFMFYIPGQPEGIR    | 4014.9244 | IPI0012137€ | IPI0012137€ | yes | no  |     | 4 0.025875   | 47.66  |
| NAIK(deEGDNITIQ)CIGNGNPPPEEFMFYIPGQPEGIR   | 4014.9244 | IPI0012137€ | IPI0012137€ | yes | no  |     | 4 0.025875   | 47.66  |
| NACCSVN(deTSQEIHK                          | 1646.7141 | IPI0011315€ | IPI0011315€ | yes | yes |     | 2 0.0021232  | 103.21 |
| N(deTTSYPPMCSQDAVGGQVISEIFTNRK             | 2999.4117 | IPI0038728€ | IPI0038728€ | yes | yes |     | 3 1.3267E-10 | 100.76 |
| N(deTTSYPPMCSQDAVGGQVISEIFTNR              | 2871.3167 | IPI0038728€ | IPI0038728€ | yes | yes |     | 3 1.074E-39  | 175.28 |
| N(deTTSAAMVHCIR                            | 1359.6387 | IPI0013121€ | IPI0013121€ | yes | yes |     | 2 0.0011773  | 117.93 |
| N(deSTIQAANIAGIK                           | 1299.7147 | IPI00222937 | IPI00222937 | yes | no  |     | 2 2.0439E-32 | 195.1  |
| N(deSTICDICIGPIK                           | 1489.7269 | IPI00987951 | IPI00987951 | yes | no  |     | 2 8.9575E-16 | 171.26 |
| N(deMTIFSDIVAEK                            | 1366.6803 | IPI00621027 | IPI00621027 | yes | no  |     | 2 0.0021857  | 102.5  |
| N(deFTDVHPDYGAR                            | 1390.6266 | IPI0031205€ | IPI0031205€ | yes | no  |     | 2 0.0055044  | 79.492 |
| N(deATVVWMK                                | 947.48987 | IPI0012137€ | IPI0012137€ | yes | no  |     | 2 0.012477   | 103.56 |
| N(deATTYPPMCSQDAAR                         | 1681.7188 | IPI0012839€ | IPI0012839€ | yes | yes |     | 2 0.0003761  | 124.16 |
| N(deATSYPMCSQDAGWAK                        | 1882.7978 | IPI0013834€ | IPI0013834€ | yes | yes |     | 2 0.044642   | 52.372 |
| N(deATIVNEADKIR                            | 1342.7205 | IPI0031950€ | IPI0031950€ | yes | no  |     | 2 0.0036373  | 115.34 |
| N(de)ATIAEQAK                              | 944.49271 | IPI0012334€ | IPI0012334€ | yes | yes |     | 2 0.033121   | 72.643 |

|                                        |           |             |             |     |     |         |            |        |
|----------------------------------------|-----------|-------------|-------------|-----|-----|---------|------------|--------|
| MYVTN(deDTEVAENNYEAIKDFFR              | 2668.2115 | IPI0065853E | IPI0065853E | yes | no  | 2,3     | 1.1535E-08 | 117.67 |
| MYSEGSDIVPQSN(deETAIHYFKK              | 2543.2002 | IPI0013114E | IPI0013114E | yes | no  | 2,3     | 3.5245E-15 | 139.08 |
| MYSEGSDIVPQSN(deETAIHYFK               | 2415.1053 | IPI0013114E | IPI0013114E | yes | no  | 2,3     | 1.3892E-14 | 132.51 |
| MYN(deNCEVVIGNIEITYVQR                 | 2314.1086 | IPI0012119C | IPI0012119C | yes | no  | 3       | 0.014509   | 60.489 |
| MWIENITNGN(deMTS                       | 1509.6592 | IPI0011694E | IPI0011694E | yes | no  | 2       | 5.8975E-16 | 170.66 |
| MWIEN(deITNGNMTS                       | 1509.6592 | IPI0011694E | IPI0011694E | yes | no  | 2       | 5.8975E-16 | 170.66 |
| MVCDIGNPMVTGTN(deFSIGIR                | 2280.1065 | IPI00345112 | IPI00345112 | yes | yes | 3       | 9.4509E-05 | 89.859 |
| MVSIDIPYFADVVPIN(deMTMK                | 2382.2037 | IPI0041114E | IPI0041114E | yes | no  | 2,3     | 1.2347E-05 | 91.725 |
| MVN(deTTFICTATNAVGTGR                  | 1912.9135 | IPI0010937E | IPI0010937E | yes | no  | 2,3     | 1.7831E-13 | 259.18 |
| MVIWN(deDSTIR                          | 1233.6176 | IPI0013597E | IPI0013597E | yes | yes | 2       | 0.0059477  | 94.767 |
| MTQIIGITPN(deATHIHRPPR                 | 2152.1688 | IPI0013032E | IPI0013032E | yes | yes | 3,4     | 0.011225   | 70.96  |
| MTQESAIIFPFIN(deK                      | 1637.8487 | IPI0085778C | IPI0085778C | yes | no  | 2,3     | 0.0013035  | 125.28 |
| MTISSIKDDIGACRN(deCCSVTK               | 2415.1015 | IPI0022335E | IPI0022335E | yes | yes | 3       | 0.0072295  | 79.311 |
| MTISQN(deNSIIR                         | 1275.6605 | IPI0010853E | IPI0010853E | no  | no  | 2       | 5.8239E-09 | 160.52 |
| MSVINFEEN(deKTAGK                      | 1597.7592 | IPI00308971 | IPI00308971 | yes | yes | 2       | 0.0060192  | 94.09  |
| MSVINFEEN(deK                          | 1240.558  | IPI00308971 | IPI00308971 | yes | yes | 2       | 0.015191   | 78.653 |
| MSQHPIDIQEDFNNATIVN(deASSIIPK          | 2881.428  | IPI0076281E | IPI0076281E | yes | yes | 3       | 5.1972E-06 | 82.593 |
| MSQHPIDIQEDFNN(deATIVNASSIIPK          | 2881.428  | IPI0076281E | IPI0076281E | yes | yes | 3       | 5.1972E-06 | 82.593 |
| MSPWSN(deWSECDPCIK                     | 1895.7641 | IPI0023071E | IPI0023071E | yes | no  | 3       | 0.0004064  | 115.06 |
| MSIVMPAMAPN(deETVSGR                   | 1789.8525 | IPI0102733E | IPI0102733E | yes | no  | 2,3     | 0.0004062  | 97.417 |
| MRSPGAQ(deDNVSVSQGMR                   | 1818.8465 | IPI0034858E | IPI0034858E | yes | no  | 3       | 1.3048E-08 | 149    |
| MQVVSND(deGTVTTAIWR                    | 1661.8559 | IPI0033117E | IPI0033117E | yes | no  | 2,3     | 1.2155E-11 | 161.84 |
| MPSQASAGNVYPQPIIN(deSSMCIEDSR          | 2851.2939 | IPI0022475E | IPI0022475E | yes | yes | 3       | 2.1701E-20 | 132.72 |
| MPFPIDQDFYVSPTFQDIIN(deR               | 2542.2202 | IPI0031817E | IPI0031817E | yes | yes | 3       | 1.0464E-05 | 97.32  |
| MNCFQGTN(deASAIEK                      | 1569.6916 | IPI0088221E | IPI0088221E | yes | yes | 3       | 0.0016048  | 108.72 |
| MN(deYTGGDTCCHK                        | 1282.5071 | IPI00308971 | IPI00308971 | yes | yes | 2       | 0.0074039  | 80.522 |
| MN(deITSIAPIEK                         | 1328.7374 | IPI0038029E | IPI0038029E | yes | no  | 2       | 0.0037129  | 82.069 |
| MISAFN(deATSGK                         | 1125.5488 | IPI0046699E | IPI0046699E | yes | no  | 2       | 0.00258    | 96.64  |
| MIPFIATIGTAAIN(deSSNP                  | 2058.1183 | IPI0038116C | IPI0038116C | yes | no  | 3       | 0.0094418  | 62.203 |
| MIEN(deGSISFIPTIR                      | 1576.8283 | IPI00123194 | IPI00123194 | yes | yes | 2,3     | 1.1657E-10 | 163.51 |
| MHIN(deGSNVQVIHR                       | 1503.7729 | IPI0011906E | IPI0011906E | yes | yes | 2,3,4   | 0.0005939  | 140.08 |
| MGDREAIGN(deASQIFDSWIK                 | 2137.0262 | IPI0013458E | IPI0013458E | yes | yes | 2,3     | 3.0604E-15 | 158.92 |
| MGCQHHCVPPTSPGPTCYCN(deSSFQIQADGK      | 3323.3675 | IPI0011906E | IPI0011906E | yes | no  | 3,4     | 4.7971E-06 | 81.315 |
| MFSQN(deDTR                            | 997.42873 | IPI0012925C | IPI0012925C | yes | yes | 2       | 9.3267E-06 | 138.4  |
| MEISVGAIQAN(deR                        | 1287.6605 | IPI00108811 | IPI00108811 | yes | yes | 2       | 0.000912   | 134.08 |
| MEAHNVSAFVN(deFSIPPGFGHR               | 2311.0957 | IPI0011548E | IPI0011548E | yes | no  | 2,3,4   | 2.9312E-47 | 192.16 |
| MEAHN(deVSAFVNFSIPPGFGHR               | 2311.0957 | IPI0011548E | IPI0011548E | yes | no  | 2,3,4   | 2.9312E-47 | 192.16 |
| MDYNSFQGTSPN(deETK                     | 1717.7254 | IPI00876541 | IPI00876541 | yes | no  | 2       | 2.3296E-17 | 172.91 |
| MDFIIFN(deYSAPSYIR                     | 1835.8916 | IPI0055350E | IPI0055350E | yes | yes | 2,3     | 1.152E-11  | 162.29 |
| MAIQYGSQNNQVAFPIITYN(deVTTHIEAIER      | 3562.7879 | IPI00621027 | IPI00621027 | yes | yes | 3,4     | 3.7698E-67 | 180.7  |
| MAAANVSITQPESTGEPNN(deMTIIAEEAR        | 2944.3906 | IPI0040001E | IPI0040001E | yes | no  | 3       | 0.0061268  | 49.793 |
| MAAAN(deVVSITQPESTGEPNNMTIIAEEAR       | 2944.3906 | IPI0040001E | IPI0040001E | yes | no  | 3       | 0.0061268  | 49.793 |
| MAAANATGRPIAFSCSWPAYEGGIPPKVN(deYTEVSR | 3880.9029 | IPI0031559E | IPI0031559E | yes | no  | 4       | 2.0001E-05 | 62.393 |
| MAAAN(deATGRPIAFSCSWPAYEGGIPPKVNYTEVSR | 3880.9029 | IPI0031559E | IPI0031559E | yes | no  | 4       | 2.0001E-05 | 62.393 |
| MAAAN(deATGR                           | 974.49675 | IPI0031559E | IPI0031559E | yes | no  | 2       | 1.7586E-07 | 125.74 |
| KYQNTIN(deCSVNV                        | 1480.7456 | IPI0042083E | IPI0042083E | yes | no  | 2,3     | 0.0022435  | 124.12 |
| KYHDYYITSTS(deNGSIEGIENR               | 2446.1401 | IPI00130754 | IPI00130754 | yes | yes | 3       | 0.0004596  | 88.565 |
| KYFDQVDIS(deNGIDWSDHDK                 | 2279.0859 | IPI0013345E | IPI0013345E | yes | yes | 3       | 1.9155E-05 | 109.42 |
| KYEQAK(deNISQDIEK                      | 1692.8683 | IPI0040001E | IPI0040001E | yes | no  | 2,3     | 6.999E-32  | 193.96 |
| KWPERISAI(deDNIINHSSIFIK               | 2480.354  | IPI0012334E | IPI0012334E | yes | yes | 3,4     | 6.789E-05  | 97.502 |
| KWGH(deNVTEFQQR                        | 1528.7535 | IPI0075438E | IPI0075438E | yes | yes | 2,3     | 0.0086339  | 81.017 |
| KVYEEVIN(deVTPNDGFAK                   | 1921.9785 | IPI0062489E | IPI0062489E | yes | no  | 3       | 0.0061653  | 77.746 |
| KVPSN(deSTETVIESDQFQPGVR               | 2317.155  | IPI0011929E | IPI0011929E | yes | no  | 2,3     | 6.0624E-31 | 176.94 |
| KVIIN(deNSIDEPR                        | 1396.7674 | IPI0041114E | IPI0041114E | yes | no  | 2,3     | 0.0051425  | 93.345 |
| KVEVEPIN(deSTAVHVSWK                   | 1922.0262 | IPI00110264 | IPI00110264 | yes | yes | 2,3     | 1.5529E-14 | 166.48 |
| KVEVEAVN(deATAVK                       | 1356.7613 | IPI0060806E | IPI0060806E | yes | no  | 2,3     | 0.005095   | 118.08 |
| KVEAEAIN(deATAIR                       | 1384.7674 | IPI0075485E | IPI0075485E | yes | no  | 2       | 0.010249   | 79.337 |
| KVDN(deASIVADDMR                       | 1432.698  | IPI0035646E | IPI0035646E | yes | no  | 2       | 0.0059832  | 92.773 |
| KTYAVYDIFDTAMIN(deNSR                  | 2121.0201 | IPI0022679C | IPI0022679C | yes | no  | 2,3     | 1.4231E-15 | 170.11 |
| KTTIEN(deFTCPEYK                       | 1629.7709 | IPI0042081C | IPI0042081C | yes | yes | 3       | 0.0059887  | 90.731 |
| KTGVHDGDFEY(deNITTTIAAINK              | 2407.202  | IPI0010884E | IPI0010884E | yes | no  | 3       | 4.7629E-11 | 125.18 |
| KTGEA(deNITQIYTQEAIQIQTHAR             | 2875.4464 | IPI0031009C | IPI0031009C | yes | no  | 3,4     | 1.2541E-38 | 170.59 |
| KTCNPETFPIRN(deESIQCP                  | 2518.2057 | IPI0064918E | IPI0064918E | yes | no  | 3       | 0.0001386  | 93.381 |
| KT(deNQSCIEVIDSTEKVNP                  | 2637.3068 | IPI0031005E | IPI0031005E | yes | no  | 3       | 6.213E-25  | 162.43 |
| KT(deNQSCIEVIDSTEK                     | 1750.8407 | IPI0031005E | IPI0031005E | yes | no  | 2,3     | 4.057E-05  | 141.85 |
| KSPGYVIDIIVTPQN(deK                    | 1770.988  | IPI0010994E | IPI0010994E | yes | yes | 3       | 0.0003798  | 118.52 |
| KSDTQNIIN(deVSTGR                      | 1694.8588 | IPI01023214 | IPI01023214 | yes | no  | 2,3     | 1.9023E-07 | 153.39 |
| KSCHTAVGTSEGNVPMGIIN(deNQTG            | 3081.4107 | IPI0047108C | IPI0047108C | yes | no  | 4       | 0.023696   | 48.489 |
| KQYDSFTFTASR(deNGTYK                   | 2012.9592 | IPI0013437E | IPI0013437E | yes | no  | 2       | 0.010868   | 88.385 |
| KQVTPIFFYFQ(deNR                       | 1686.8882 | IPI0031950E | IPI0031950E | yes | no  | 2,3     | 4.4541E-06 | 152.85 |
| KQEIPSN(deCSIPYHVYNIK                  | 2189.0939 | IPI0031130E | IPI0031130E | yes | yes | 3       | 0.015554   | 67.646 |
| KPISQFEAYVN(deASGEHGIVVFSIGSMVSEIPEKK  | 3805.9237 | IPI00134691 | IPI00134691 | yes | no  | 4,5,6   | 5.399E-17  | 94.15  |
| KPIIGHYKPDIAVVIEN(deGTSIDR             | 2635.4334 | IPI0041079E | IPI0041079E | yes | no  | 3,4     | 3.3613E-05 | 88.396 |
| KNVNISYTV(deNDSFFPQRPQK                | 2381.2128 | IPI0038117E | IPI0038117E | yes | yes | 2,3,4,5 | 3.568E-154 | 260.97 |
| KNV(deNISYTVNDSFFPQRPQK                | 2381.2128 | IPI0038117E | IPI0038117E | yes | yes | 2,3,4,5 | 3.568E-154 | 260.97 |
| KNIQAVNEIATISQC(deNDTSSAAMVQCIR        | 3234.5795 | IPI0013834E | IPI0013834E | yes | no  | 3,4     | 0.0004322  | 68.309 |
| KNACCSV(deNTSQEIHK                     | 1774.8091 | IPI0011315E | IPI0011315E | yes | yes | 3       | 0.0041651  | 88.282 |
| KN(deITSPVGVQPIINEHTFCAGITK            | 2623.3792 | IPI0040914E | IPI0040914E | yes | yes | 3       | 1.6827E-15 | 123.36 |
| KN(deITDIVEGAKK                        | 1314.7507 | IPI0064918E | IPI0064918E | yes | no  | 3       | 0.01575    | 100.04 |
| KN(deITDIVEGAK                         | 1186.6558 | IPI0064918E | IPI0064918E | yes | no  | 2       | 0.0007586  | 119.39 |
| KN(deISEIWDAYCYR                       | 1716.793  | IPI0098726E | IPI0098726E | yes | no  | 2,3     | 0.012174   | 77.912 |
| KMVIW(deNDSTIR                         | 1361.7126 | IPI0013597E | IPI0013597E | yes | yes | 3       | 0.026268   | 73.499 |
| KKENGVFEEISN(deSSGR                    | 1779.8751 | IPI00757771 | IPI00757771 | yes | no  | 2,3     | 2.8525E-05 | 121.31 |
| KIVYIEHNIEK(deNSTK                     | 1928.0731 | IPI0032119C | IPI0032119C | yes | no  | 2       | 0.048139   | 70.235 |
| KITDVETQVIN(deQTSR                     | 1730.9163 | IPI0011435C | IPI0011435C | yes | yes | 2       | 0.0033521  | 91.657 |
| KITDVEAQVIN(deQTTR                     | 1714.9214 | IPI0013260E | IPI0013260E | yes | yes | 3       | 0.0007909  | 124.42 |

|                                                |           |             |             |     |     |       |   |             |        |
|------------------------------------------------|-----------|-------------|-------------|-----|-----|-------|---|-------------|--------|
| KISTSPFAIN(deITMIPK                            | 1759.9906 | IPI00666034 | IPI00666034 | yes | no  |       | 3 | 1.386E-05   | 141.34 |
| KISTN(deITIVCKPGDIESAPVIR                      | 2410.3254 | IPI00308971 | IPI00308971 | yes | yes |       | 3 | 9.1276E-21  | 157.22 |
| KINIDGS(deNYTIK                                | 1477.814  | IPI00119063 | IPI00119063 | yes | yes | 2,3   |   | 4.6494E-05  | 150.26 |
| KINASIVTSFVEIPIVSN(deVSIR                      | 2385.3631 | IPI00323857 | IPI00323857 | yes | no  |       | 3 | 3.3065E-11  | 127.17 |
| KIN(deASIVTSFVEIPIVSNVSIR                      | 2385.3631 | IPI00323857 | IPI00323857 | yes | no  |       | 3 | 3.3065E-11  | 127.17 |
| KIIASPNEEN(deMTEIISMR                          | 2075.0391 | IPI00322575 | IPI00322575 | yes | no  | 2,3,4 |   | 2.249E-15   | 168.05 |
| KIDFIVIN(deETR                                 | 1346.7558 | IPI00125813 | IPI00125813 | yes | no  | 2,3   |   | 0.0006611   | 129.37 |
| KHYQVTGYGIN(deGTGDSNDFWR                       | 2414.104  | IPI00221669 | IPI00221669 | yes | no  |       | 3 | 0.0034022   | 92.307 |
| KGQNMVCGMGCDN(deDSIVQQIFNAEIDTYTR              | 3591.5851 | IPI0013260C | IPI0013260C | yes | no  | 3,4,5 |   | 1.6478E-67  | 185.06 |
| KGN(deNTINPFIIPSASDVPTGCPNQQWVPYAGHCYR         | 3916.8202 | IPI0012618E | IPI0012618E | yes | yes |       | 4 | 9.3157E-08  | 74.13  |
| KGMWSEGN(deGSHTIR                              | 1558.7311 | IPI00123129 | IPI00123129 | yes | no  |       | 3 | 0.0037489   | 104.95 |
| KGFCEADN(deSTVSENNPEDWPVNTEGCMK                | 3343.3704 | IPI0010809E | IPI0010809E | yes | yes | 3,4   |   | 2.847E-10   | 97.124 |
| KGCADYCN(deQTITK                               | 1557.6916 | IPI0098726E | IPI0098726E | yes | no  | 2,3   |   | 0.0069709   | 105.65 |
| KFPVFPQKEN(deVTATIVEIGR                        | 2272.258  | IPI00134691 | IPI00134691 | yes | yes | 2,3,4 |   | 1.5844E-89  | 171.29 |
| KFN(deSTQIAAMAPEHEEPR                          | 2054.9844 | IPI00856861 | IPI00856861 | yes | no  |       | 3 | 1.0772E-14  | 162.59 |
| KEQETCIAPEIEHGN(deYSTTQR                       | 2490.1445 | IPI00122117 | IPI00122117 | yes | yes |       | 3 | 1.0059E-17  | 145.02 |
| KENGVFEEISNS(deSGR                             | 1651.7802 | IPI00757771 | IPI00757771 | yes | no  | 2,3   |   | 5.7041E-13  | 123.76 |
| KENG(deVFEEISNSSGR                             | 1651.7802 | IPI00757771 | IPI00757771 | yes | no  | 2,3   |   | 5.7041E-13  | 123.76 |
| KEN(deSSYQVINWR                                | 1522.7528 | IPI0015331E | IPI0015331E | yes | yes | 2,3   |   | 0.0023017   | 125.82 |
| KEN(deSSEICSNNGECVCGQCVCVR                     | 2646.0349 | IPI00132474 | IPI00132474 | yes | no  |       | 3 | 5.1846E-21  | 154.49 |
| KEDSCQIN(deYSEGPCIGMQR                         | 2400.0144 | IPI00127352 | IPI00127352 | yes | yes | 2,3   |   | 8.3747E-42  | 195.96 |
| KDTCAQECSHFN(deITKVESR                         | 2309.0529 | IPI00132474 | IPI00132474 | yes | no  |       | 3 | 0.012911    | 80.859 |
| KDTCAQECSHFN(deITK                             | 1837.8087 | IPI00132474 | IPI00132474 | yes | no  | 2,3   |   | 0.0007763   | 119.62 |
| KDGSQDFN(deETWENYEK                            | 1988.8388 | IPI0012820E | IPI0012820E | yes | yes |       | 2 | 0.0052475   | 81.594 |
| KCQEAIN(deATCK                                 | 1321.6119 | IPI00314443 | IPI00314443 | yes | no  |       | 3 | 0.011328    | 84.658 |
| KCNSDNISYVIHCEPEN(deNTK                        | 2421.0689 | IPI00323053 | IPI00323053 | yes | no  |       | 3 | 0.0001521   | 93.381 |
| KCNSDN(deISYVIHCEPENNTK                        | 2421.0689 | IPI00323053 | IPI00323053 | yes | no  |       | 3 | 0.0001521   | 93.381 |
| KCEVICN(deQSNKPITITVEQSR                       | 2503.2523 | IPI00626537 | IPI00626537 | yes | yes |       | 3 | 4.2044E-10  | 121.82 |
| KCEAN(deITISSPAR                               | 1445.7297 | IPI00894972 | IPI00894972 | yes | no  | 2,3   |   | 0.0073163   | 104.41 |
| KAWGISVINP(deNKTK                              | 1554.8882 | IPI0098909E | IPI0098909E | yes | yes | 2,3,4 |   | 9.5788E-05  | 150.05 |
| KAFITN(deFSMIIDGVTYPGVVKEK                     | 2556.3662 | IPI00312711 | IPI00312711 | yes | no  | 3,4   |   | 7.7626E-21  | 152.13 |
| KAFITN(deFSMIIDGVTYPGVVK                       | 2299.2286 | IPI00312711 | IPI00312711 | yes | no  | 2,3,4 |   | 6.877E-18   | 146.72 |
| IYWTGDGNISMANMDGSN(deHTIIFSGQK                 | 3014.3539 | IPI00119063 | IPI00119063 | yes | yes | 3,4   |   | 5.4095E-38  | 156.74 |
| IYWTGDGNIS(deMANMDGSNHTIIFSGQK                 | 3014.3539 | IPI00119063 | IPI00119063 | yes | yes | 3,4   |   | 5.4095E-38  | 156.74 |
| IYWISSGNHTIN(deR                               | 1559.7845 | IPI00119063 | IPI00119063 | yes | yes | 2,3   |   | 2.2933E-123 | 254.18 |
| IYWISSGN(deHTINR                               | 1559.7845 | IPI00119063 | IPI00119063 | yes | yes | 2,3   |   | 2.2933E-123 | 254.18 |
| IYVIDGTQN(deDTAFVFR                            | 1954.9789 | IPI0030865E | IPI0030865E | yes | no  | 2,3   |   | 5.3282E-07  | 136.36 |
| IYSDQCHHNISIIPPPTEIVCN(deR                     | 2762.3269 | IPI00123442 | IPI00123442 | yes | yes |       | 3 | 1.2492E-06  | 99.409 |
| IYSDQCHHN(deISIIPPPTEIVCNR                     | 2762.3269 | IPI00123442 | IPI00123442 | yes | yes |       | 3 | 1.2492E-06  | 99.409 |
| IYPPSSIPQGAEYN(deISAIVTIATK                    | 2532.3476 | IPI00122592 | IPI00122592 | yes | yes | 3,4   |   | 0.016346    | 52.09  |
| IYPIEN(deITAPDPHPVDSIPPVAYNPWMDIR              | 3542.7908 | IPI01023131 | IPI01023131 | yes | no  | 3,4   |   | 0.0029976   | 50.505 |
| IYNVTHQFCN(deASVMDPTCVR                        | 2411.0821 | IPI0013260C | IPI0013260C | yes | no  | 2,3   |   | 4.865E-96   | 235.95 |
| IYN(deVTHQFCNASVMDPTCVR                        | 2411.0821 | IPI0013260C | IPI0013260C | yes | no  | 2,3   |   | 4.865E-96   | 235.95 |
| IYIETIPN(deTSIIPFHNEGWSSIR                     | 2912.5436 | IPI0031479E | IPI0031479E | yes | yes |       | 3 | 4.6425E-06  | 87.326 |
| IYIEIGQMPTQESTN(deSSDSVSATAIVEVTEEFDR          | 3802.7731 | IPI00122973 | IPI00122973 | yes | no  |       | 4 | 4.729E-14   | 97.352 |
| IYIDHNN(deITR                                  | 1257.6466 | IPI00120187 | IPI00120187 | yes | yes | 2,3   |   | 3.9168E-07  | 141.88 |
| IYAGMVSIMDEAVGN(deVTK                          | 1896.9325 | IPI0065235E | IPI0065235E | yes | no  | 2,3   |   | 4.6489E-09  | 145.91 |
| IWVN(deSSDGISPVIGK                             | 1570.8355 | IPI00848693 | IPI00848693 | yes | yes | 2,3   |   | 0.0001794   | 132.84 |
| IWVHNGAPVN(deASASCR                            | 1737.8369 | IPI0046413E | IPI0046413E | yes | yes | 2,3   |   | 0.0001814   | 121.13 |
| IWRGPN(deVTVITGTR                              | 1681.9628 | IPI0087726C | IPI0087726C | yes | no  |       | 3 | 0.007667    | 82.908 |
| IWN(deSTFIEEYSK                                | 1515.7246 | IPI0042083E | IPI0042083E | yes | no  |       | 2 | 0.0015664   | 110.31 |
| IWIPVN(deITWADIEDKDGR                          | 2140.0953 | IPI00126253 | IPI00126253 | yes | no  | 2,3   |   | 2.3632E-15  | 169.28 |
| IWIPVN(deITWADIEDK                             | 1811.9458 | IPI00126253 | IPI00126253 | yes | no  | 2,3   |   | 0.0003541   | 126.09 |
| IWEATN(deSSIQQIR                               | 1672.8533 | IPI0064909C | IPI0064909C | yes | no  | 2,3   |   | 3.2969E-07  | 158.04 |
| IWDPSHPGIQN(deISR                              | 1705.8536 | IPI0033820E | IPI0033820E | yes | no  | 2,3   |   | 0.0003182   | 127.36 |
| IVYN(deHSSGR                                   | 1031.5148 | IPI0013350C | IPI0013350C | yes | yes |       | 2 | 3.5773E-05  | 132.88 |
| IVVN(deVSDKNDHAPWFTSPSYDGR                     | 2603.2405 | IPI00623114 | IPI00623114 | yes | no  |       | 3 | 0.0009128   | 79.461 |
| IVTQTIPCN(deKTIFWSK                            | 1935.0288 | IPI0030796E | IPI0030796E | yes | yes | 2,3   |   | 0.0001896   | 131.56 |
| IVTQTIPCN(deK                                  | 1172.6223 | IPI0030796E | IPI0030796E | yes | yes |       | 2 | 1.3483E-07  | 147.75 |
| IVPCEFGVIYPIAEN(deFSR                          | 2110.0557 | IPI0012190E | IPI0012190E | yes | no  | 2,3   |   | 7.7403E-09  | 145.46 |
| IVKIPSGTIVISN(deATEGDGGIYR                     | 2359.2747 | IPI0012915E | IPI0012915E | yes | no  |       | 3 | 2.4796E-111 | 158.92 |
| IVIYIEHNIKEN(deSTKEEIIAAIEK                    | 2796.5273 | IPI0032119C | IPI0032119C | yes | no  | 2,3,4 |   | 5.7562E-133 | 236.95 |
| IVIYIEHNIKEN(deSTK                             | 1799.9781 | IPI0032119C | IPI0032119C | yes | no  | 2,4   |   | 0.001121    | 124.25 |
| IVIWTAEQGGIGASQYYEIHKAN(deISK                  | 3004.5294 | IPI0012605C | IPI0012605C | yes | no  |       | 4 | 0.0005103   | 75.064 |
| IVIIDPAISN(deNSFSSNPYPYDR                      | 2651.3231 | IPI00848693 | IPI00848693 | yes | yes | 2,3,4 |   | 1.0257E-13  | 112.88 |
| IVGSPFIGCTVVN(deK                              | 1489.7963 | IPI0013480E | IPI0013480E | yes | no  | 2,3   |   | 1.44E-32    | 191.79 |
| IVGGTN(deASIGEWPPQVSIQVK                       | 2268.1903 | IPI00113057 | IPI00113057 | yes | yes | 2,3   |   | 1.669E-25   | 167.51 |
| IVFTHPN(deWTIS                                 | 1313.6768 | IPI00125262 | IPI00125262 | yes | yes |       | 2 | 0.0037563   | 91.549 |
| IVEDIESFIKPYSVVEEQKN(deITSCPDGAPFIQHGPDYR      | 4278.0579 | IPI00124221 | IPI00124221 | yes | yes | 4,5   |   | 9.1521E-14  | 97.312 |
| IVDVN(deITSEGKVK                               | 1400.7875 | IPI0011352E | IPI0011352E | yes | no  | 2,3   |   | 0.0072112   | 131.66 |
| IVDVN(deITSEGK                                 | 1173.6241 | IPI0011352E | IPI0011352E | yes | no  |       | 2 | 3.8899E-07  | 154.36 |
| IV(deVPINNRENISDPTSPIRR                        | 2289.2553 | IPI0013692E | IPI0013692E | yes | no  | 2,3   |   | 0.0004885   | 93.754 |
| IV(deVPINNRENISDPTSPIR                         | 2133.1542 | IPI0013692E | IPI0013692E | yes | no  |       | 2 | 2.1047E-41  | 196.71 |
| ITYN(deESR                                     | 881.4243  | IPI01008227 | IPI01008227 | yes | no  |       | 2 | 0.0068777   | 111.74 |
| ITWSNAN(deGTASYR                               | 1439.6793 | IPI0046942E | IPI0046942E | yes | no  |       | 2 | 0.0031956   | 88.075 |
| ITVVYAEN(deGTVIQGTTVASVYK                      | 2312.2264 | IPI0031735E | IPI0031735E | yes | yes | 2,3   |   | 7.8373E-223 | 217.86 |
| ITVIDANDNAPAFN(deQSIYR                         | 2121.0491 | IPI00129613 | IPI00129613 | yes | yes | 2,3   |   | 1.807E-41   | 192.09 |
| ITTTSPWMIPAPHVWPEDHVFISTPNFN(deYTVQDFER        | 4272.0415 | IPI0013350C | IPI0013350C | yes | yes | 4,5,6 |   | 0.0001122   | 56.977 |
| ITTTPTNGQQGTSIEEVHADQSSCTFENINPGIEYN(deVSVYTVK | 4827.2821 | IPI0011353E | IPI0011353E | yes | no  | 4,5   |   | 8.4839E-06  | 54.09  |
| ITSCATN(deASMCDEAR                             | 1742.7022 | IPI00119063 | IPI00119063 | yes | yes | 2,3   |   | 3.5413E-59  | 219.52 |
| ITPNCCN(deTSTVADAYR                            | 1841.8036 | IPI0011122E | IPI0011122E | yes | yes |       | 2 | 0.0004779   | 106.93 |
| ITNSPQNQN(deITVPR                              | 1580.8271 | IPI00406603 | IPI00406603 | yes | yes |       | 2 | 0.00953     | 71.279 |
| ITN(deQTIGFSFAVEQDIPVK                         | 2106.0997 | IPI00624663 | IPI00624663 | yes | yes | 2,3,4 |   | 2.5294E-96  | 237.14 |
| ITN(deSIAMSGVYVCK                              | 1654.8422 | IPI00126827 | IPI00126827 | yes | no  |       | 3 | 0.0003089   | 127.36 |
| ITIAIN(deNTITPHTIPPGTIVYK                      | 2376.3417 | IPI0030923C | IPI0030923C | yes | no  | 2,3,4 |   | 2.8939E-20E | 281.07 |
| ITHIPDDIPSNTIVIN(deITHNQIR                     | 2623.4082 | IPI0032061E | IPI0032061E | yes | yes | 3,4   |   | 1.6111E-06  | 98.816 |



|                                               |           |             |             |     |     |       |             |        |
|-----------------------------------------------|-----------|-------------|-------------|-----|-----|-------|-------------|--------|
| ITHIPDDIPSN(deITVINITHNQIR                    | 2623.4082 | IPI0032061E | IPI0032061E | yes | yes | 3,4   | 1.6111E-06  | 98.816 |
| ITGSAGN(deYTVQCQK                             | 1397.6609 | IPI00230412 | IPI00230412 | yes | yes | 2,3   | 0.0032104   | 93.494 |
| ITEFTHN(deSTMDYK                              | 1585.7083 | IPI0013001C | IPI0013001C | yes | no  | 2,3   | 0.0024667   | 119.96 |
| ITDNMFCAGFKVN(deDTK                           | 1859.8546 | IPI0011420E | IPI0011420E | yes | yes | 2     | 0.0060355   | 85.619 |
| ITDIEN(deGTFANIPR                             | 1559.7944 | IPI00117957 | IPI00117957 | yes | yes | 3     | 0.0006973   | 136.3  |
| ITATDGENFATPIYIN(deITVAASR                    | 2437.2489 | IPI00623114 | IPI00623114 | yes | no  | 3     | 8.0026E-32  | 176.1  |
| ISVPDGIKVSND(deSSAR                           | 1528.8209 | IPI00120761 | IPI00120761 | yes | no  | 2,3   | 3.2471E-11  | 162.37 |
| ISTSPFAINI(deTMIPK                            | 1631.8957 | IPI00666034 | IPI00666034 | yes | no  | 2,3   | 2.6739E-07  | 132.86 |
| ISTNI(deTIVCKPGDIESAPVIR                      | 2282.2304 | IPI00308971 | IPI00308971 | yes | yes | 2     | 3.3111E-47  | 191.22 |
| ISQN(deASIGPHVRPIPIQYEDKEVEPGTICDVAGWGVVTHAGR | 4552.2921 | IPI0011694E | IPI0011694E | yes | no  | 4     | 1.1192E-07  | 65.272 |
| ISQN(deASIGPHVRPIPIQYEDK                      | 2361.2441 | IPI0011694E | IPI0011694E | yes | no  | 3     | 4.3532E-05  | 95.409 |
| ISQKN(deQTVFER                                | 1348.7099 | IPI00130117 | IPI00130117 | yes | no  | 2     | 0.0023895   | 110.31 |
| ISQAIGN(deITVVQK                              | 1369.7929 | IPI00112032 | IPI00112032 | yes | no  | 2,3   | 5.3195E-16  | 174.95 |
| ISPIHIAIN(deFSIDPK                            | 1663.9297 | IPI0011597E | IPI0011597E | yes | yes | 3     | 6.0202E-13  | 124.51 |
| ISPGGAEMFQVQDMVVSQEKGND(deCSIQR               | 2994.3998 | IPI00130117 | IPI00130117 | yes | no  | 3,4   | 0.0002863   | 76.049 |
| ISNISN(deISHDIVQEATDHAYNIQQEADEISR            | 3509.6659 | IPI0022344E | IPI0022344E | yes | yes | 4     | 2.4191E-06  | 80.355 |
| ISN(deVTPEDAGTYCVK                            | 1815.8349 | IPI0012915E | IPI0012915E | yes | no  | 2     | 0.0001099   | 127.29 |
| ISN(deITIIIEMEKESAR                           | 1845.987  | IPI00356462 | IPI00356462 | yes | no  | 2     | 0.000372    | 124.43 |
| ISITN(deETFRK                                 | 1207.6561 | IPI00123652 | IPI00123652 | yes | no  | 2     | 2.5783E-05  | 131.82 |
| ISITN(deETFR                                  | 1079.5611 | IPI00123652 | IPI00123652 | yes | no  | 2     | 0.0027068   | 118.71 |
| ISISEN(deYTISIANAK                            | 1622.8516 | IPI0012137E | IPI0012137E | yes | no  | 2,3   | 6.0908E-34  | 194.3  |
| ISIN(deESMQVVS                                | 1361.6973 | IPI00471022 | IPI00471022 | yes | yes | 2     | 0.0084863   | 75.102 |
| ISHYN(deDTYPISPQR                             | 1786.8638 | IPI0011303E | IPI0011303E | yes | no  | 2,3   | 7.4518E-12  | 165.34 |
| ISHYKQN(deFSFCR                               | 1585.746  | IPI0038130E | IPI0038130E | yes | yes | 2     | 0.0070188   | 95.417 |
| ISHDGN(deETIPIHIYVK                           | 1834.9577 | IPI00405742 | IPI00405742 | yes | no  | 2,3,4 | 5.3492E-10E | 241.8  |
| ISGKPTN(deVSVSVIMSEGDGICY                     | 2312.1028 | IPI0096897E | IPI0096897E | yes | no  | 2     | 7.214E-25   | 162.42 |
| ISEN(deGSSVAGIISPMEK                          | 1918.9306 | IPI0039979E | IPI0039979E | yes | no  | 2,3   | 3.729E-19   | 164.94 |
| ISEGNRTITI(deINVTRNDTGPYVCETR                 | 2978.488  | IPI0010853E | IPI0010853E | yes | no  | 3,4   | 1.9337E-06  | 92.034 |
| ISEGND(deTITIINVTNRNDTGPYVCETR                | 2978.488  | IPI0010853E | IPI0010853E | yes | no  | 3,4   | 1.9337E-06  | 92.034 |
| ISEGND(deTITIINVTNR                           | 1685.9424 | IPI0010853E | IPI0010853E | yes | no  | 2     | 0.043764    | 66.059 |
| ISEGND(deRTITIINVTNRNDTGPYVCETR               | 2978.488  | IPI0010853E | IPI0010853E | yes | no  | 3,4   | 1.9337E-06  | 92.034 |
| ISEGND(deRTITIINVTNR                          | 1685.9424 | IPI0010853E | IPI0010853E | yes | no  | 2     | 0.043764    | 66.059 |
| ISEEFIKN(deISASAR                             | 1563.8257 | IPI0089497C | IPI0089497C | yes | no  | 2     | 0.0044681   | 108.58 |
| ISDTN(deITAIPQGIPTSITEVHIDGNKITKVDAPSIK       | 3786.0415 | IPI0012319E | IPI0012319E | yes | yes | 4     | 0.0039614   | 51.595 |
| ISDTN(deITAIPQGIPTSITEVHIDGNKITK              | 3075.6452 | IPI0012319E | IPI0012319E | yes | yes | 3,4,5 | 1.2527E-18  | 115.88 |
| ISDTN(deITAIPQGIPTSITEVHIDGNK                 | 2733.4185 | IPI0012319E | IPI0012319E | yes | yes | 2,3   | 2.5524E-29  | 151.01 |
| ISCAFKTEN(deQTR                               | 1453.6984 | IPI0012024E | IPI0012024E | yes | no  | 2,3   | 0.0024515   | 134.56 |
| ISASGAEIEAIEAQVIN(deISIK                      | 2155.1736 | IPI00312711 | IPI00312711 | yes | no  | 2,3   | 3.8225E-10E | 231.83 |
| ISAIIDNIIN(deHSSIFIKGAR                       | 2068.1429 | IPI00123342 | IPI00123342 | yes | yes | 3     | 0.011918    | 70.802 |
| ISAIIDNIIN(deHSSIFIK                          | 1783.9832 | IPI00123342 | IPI00123342 | yes | yes | 2,3   | 1.5968E-72  | 227    |
| IRPINF(deKSFESTVGGSDTYSYIFR                   | 2911.4505 | IPI00108844 | IPI00108844 | yes | yes | 3     | 1.6683E-32  | 132.65 |
| IRPHFISVCDPDFSQIN(deCSEGYIQNYR                | 3314.5237 | IPI0011562E | IPI0011562E | yes | yes | 3,4   | 6.5978E-42  | 161.02 |
| IRNPCTSE(deQNCTSPFSYK                         | 2187.9677 | IPI00132474 | IPI00132474 | yes | yes | 2,3   | 4.727E-15   | 168.08 |
| IRN(deSSIGGVINKYDVVIR                         | 2002.1324 | IPI0031467E | IPI0031467E | yes | yes | 3,4   | 0.0002798   | 114.01 |
| IRN(deSSIGGVINK                               | 1256.7201 | IPI0031467E | IPI0031467E | yes | yes | 2     | 3.0062E-10  | 165.58 |
| IRN(deATITQAITNK                              | 1442.8205 | IPI0087602E | IPI0087602E | yes | yes | 3     | 0.012514    | 80.312 |
| IRIN(deTTSDEKDPTNPF                           | 2003.0072 | IPI00131881 | IPI00131881 | yes | no  | 3     | 0.004695    | 98.943 |
| IRDYEEN(deSSSCHKEVQIIK                        | 2334.1274 | IPI00330594 | IPI00330594 | yes | yes | 3     | 0.0038867   | 88.992 |
| IRDYEEN(deSSSCHK                              | 1623.6947 | IPI00330594 | IPI00330594 | yes | yes | 2,3   | 0.0089541   | 94.122 |
| IRDNAIGN(deVSCTIHNEAIGQEK                     | 2438.1972 | IPI0012451E | IPI0012451E | yes | no  | 3     | 5.4941E-08  | 105.91 |
| IR(deVNGTKEPIEFK                              | 1529.8566 | IPI00345112 | IPI00345112 | yes | no  | 2,3   | 0.023546    | 96.64  |
| IQVTIYN(deCSFGR                               | 1456.7133 | IPI00405742 | IPI00405742 | yes | no  | 2     | 0.001106    | 122.39 |
| IQTPIIN(deYTEFQKPICIIPSK                      | 2276.1875 | IPI00113057 | IPI00113057 | yes | yes | 2,3,4 | 3.5689E-10  | 137.61 |
| IQSPIFIIDANANIQN(deVTTSGNK                    | 2457.2864 | IPI00666034 | IPI00666034 | yes | no  | 3     | 8.0864E-12  | 125.45 |
| IQQEPGIIIGPGN(deSTIFIER                       | 2181.1794 | IPI00124497 | IPI00124497 | yes | yes | 3     | 0.000107    | 91.401 |
| IQNN(deISYQMADIHHIK                           | 1923.9625 | IPI00453632 | IPI00453632 | yes | no  | 3     | 0.012026    | 66.246 |
| IQIEFRPIDIN(deSTAAGIPR                        | 2110.1535 | IPI0011551C | IPI0011551C | yes | yes | 2,3   | 4.3056E-08  | 128.79 |
| IQFDDN(deGTYTCQVK                             | 1687.7512 | IPI0011647E | IPI0011647E | yes | no  | 2     | 0.0013728   | 115.82 |
| IQDIEITGSPVSNISAHIFSN(deISSIEK                | 2898.4975 | IPI00119522 | IPI00119522 | yes | yes | 3,4   | 1.4373E-42  | 164.79 |
| IQDIEITGSPVSN(deISAHIFSNISSIEK                | 2898.4975 | IPI00119522 | IPI00119522 | yes | yes | 3,4   | 1.4373E-42  | 164.79 |
| IQDFVDNETFSGFIQHN(deSIPR                      | 2689.35   | IPI00112614 | IPI00112614 | yes | yes | 3,4   | 1.7807E-19  | 149.85 |
| IQDFVDN(deETFSGFIQHNISIPR                     | 2689.35   | IPI00112614 | IPI00112614 | yes | yes | 3,4   | 1.7807E-19  | 149.85 |
| IQCVDGN(deWTTIPVCIEER                         | 2318.0671 | IPI0013001C | IPI0013001C | yes | no  | 2     | 7.5696E-53  | 206.7  |
| IPYQGN(deATMIVVIMEK                           | 1805.942  | IPI0015325E | IPI0015325E | yes | yes | 3     | 0.0001577   | 112.5  |
| IPVAVIN(deATAK                                | 1095.6652 | IPI00122491 | IPI00122491 | yes | yes | 2     | 0.010131    | 77.64  |
| IPSSIENATISIMN(deITGTAICHISDIPPDGIR           | 3492.7593 | IPI0012177E | IPI0012177E | yes | yes | 3,4   | 0.0001311   | 61.499 |
| IPSSIEN(deATSISIMNITGTAICHISDIPPDGIR          | 3492.7593 | IPI0012177E | IPI0012177E | yes | yes | 3,4   | 0.0001311   | 61.499 |
| IPQIIHHYIN(deASDWER                           | 2005.9759 | IPI00666034 | IPI00666034 | yes | no  | 2,3   | 0.0007021   | 102.64 |
| IPPINIGEVIPEANFSPFSIPNCN(deR                  | 3008.543  | IPI00322304 | IPI00322304 | yes | yes | 4     | 0.0001579   | 76.049 |
| IPNNTQWITW(deSPEGHK                           | 1906.9326 | IPI0012581E | IPI0012581E | yes | no  | 2,3   | 4.2404E-18  | 176.4  |
| IPN(deISIDVIQPSFPEIIIESHMVMIR                 | 2990.5973 | IPI0022166E | IPI0022166E | yes | no  | 3,4   | 0.0008994   | 65.425 |
| IPFNVMNNVEDIIEQQTFN(deDTVSPR                  | 3032.4913 | IPI0031004E | IPI0031004E | yes | yes | 3,4   | 0.0036181   | 59.814 |
| INTT(deSDEKDPTNPF                             | 2618.2976 | IPI00131881 | IPI00131881 | yes | no  | 3     | 0.017971    | 67.251 |
| INTT(deSDEKDPTNPF                             | 1733.822  | IPI00131881 | IPI00131881 | yes | no  | 2     | 0.0039818   | 95.067 |
| INSAPVEGYSEHVGN(deKTTIR                       | 2171.0971 | IPI0034983C | IPI0034983C | yes | no  | 3,4   | 5.0158E-06  | 114.99 |
| INSAPVEGYSEHVGN(deK                           | 1699.8166 | IPI0034983C | IPI0034983C | yes | no  | 2,3   | 2.2673E-45  | 205.68 |
| INQINFQNIYQIFN(deETTSQVNK                     | 2655.3293 | IPI00356462 | IPI00356462 | yes | no  | 3     | 2.6398E-11  | 124.63 |
| INNGGCQDICIITHQGHVN(deCSCR                    | 2712.1737 | IPI0011906E | IPI0011906E | yes | yes | 3     | 0.0037558   | 65.149 |
| INN(deITNIGPIDMK                              | 1441.7599 | IPI0033068C | IPI0033068C | yes | no  | 2,3   | 0.0024919   | 128.76 |
| INMTIPDAIVPTFSISN(deHSIK                      | 2297.209  | IPI0046921E | IPI0046921E | yes | yes | 2,3   | 6.4027E-05  | 100.39 |
| INIDGSN(deYTIK                                | 1349.7191 | IPI0011906E | IPI0011906E | yes | yes | 2     | 0.0025462   | 95.264 |
| INETHIFN(deGSNWIMIIYK                         | 2192.1088 | IPI00108844 | IPI00108844 | yes | yes | 2,3   | 1.7488E-60  | 211.57 |
| INAIN(deITSAIDR                               | 1299.7147 | IPI0075038E | IPI0075038E | yes | no  | 2     | 0.0032478   | 86.803 |
| IN(deYTIVGEP                                  | 1273.703  | IPI00120674 | IPI00120674 | yes | no  | 2     | 0.0004346   | 118.37 |
| IN(deVTSPDIFR                                 | 1160.619  | IPI0011691E | IPI0011691E | yes | yes | 2     | 0.011583    | 83.397 |
| IN(deVTEVYDKIK                                | 1320.7289 | IPI00225072 | IPI00225072 | yes | no  | 2,3   | 0.0009413   | 130.56 |

|                                           |           |             |             |     |     |       |              |        |
|-------------------------------------------|-----------|-------------|-------------|-----|-----|-------|--------------|--------|
| IN(deVSYTGERPSSNMVIVDK                    | 2207.1256 | IPI00624663 | IPI00624663 | yes | yes | 2,3   | 2.3472E-12   | 141.64 |
| IN(deVSHAGAPIGEEYIIVFSR                   | 2171.1375 | IPI00785452 | IPI00785452 | yes | no  |       | 3 2.7453E-06 | 111.77 |
| IN(deMTIPDAIVPTFSISNHSIK                  | 2297.209  | IPI00469218 | IPI00469218 | yes | yes | 2,3   | 6.4027E-05   | 100.39 |
| IN(deITEEEEKIINRR                         | 1626.9053 | IPI00320204 | IPI00320204 | yes | yes |       | 3 0.046346   | 76.655 |
| IN(deITEEEEKIINR                          | 1470.8042 | IPI00320204 | IPI00320204 | yes | yes |       | 2 0.0085379  | 88.087 |
| IN(deITEEEEK                              | 974.49204 | IPI00320204 | IPI00320204 | yes | yes |       | 2 0.030775   | 81.338 |
| IN(deITAAQISQIEGIIQAR                     | 1938.0898 | IPI00115516 | IPI00115516 | yes | no  |       | 3 2.6623E-11 | 157.11 |
| IN(deISEGEVAATVK                          | 1329.714  | IPI00458003 | IPI00458003 | yes | yes |       | 2 0.0012353  | 137.46 |
| IN(deGTDPIVAADSKR                         | 1455.7682 | IPI00119063 | IPI00119063 | yes | yes | 2,3   | 0.0033548    | 107.69 |
| IN(deFTGPGEPDSIR                          | 1401.6888 | IPI00320605 | IPI00320605 | yes | no  |       | 2 0.0039484  | 102.73 |
| IN(deETHIFNGSNWIMIIYK                     | 2192.1088 | IPI00108844 | IPI00108844 | yes | yes | 2,3   | 1.7488E-60   | 211.57 |
| IN(deASIADIQSK                            | 1158.6245 | IPI00116913 | IPI00116913 | yes | no  |       | 2 0.0054874  | 85.554 |
| IMQDPQQAEGIYCN(deR                        | 1934.8979 | IPI00314549 | IPI00314549 | yes | yes | 2,3   | 1.7203E-25   | 186.56 |
| IMNAPIYIAEWQNITKN(deISEDR                 | 2618.3163 | IPI00930882 | IPI00930882 | yes | no  |       | 3 1.1041E-07 | 107.72 |
| IMNAPIYIAEWQN(deITKNISEDR                 | 2618.3163 | IPI00930882 | IPI00930882 | yes | no  |       | 3 1.1041E-07 | 107.72 |
| IMNAPIYIAEWQN(deITK                       | 1903.9866 | IPI00930882 | IPI00930882 | yes | no  |       | 3 2.7311E-12 | 164.65 |
| IMESHVN(deGTFSK                           | 1417.666  | IPI00468055 | IPI00468055 | yes | no  | 2,3   | 0.003403     | 97.463 |
| IKV(deSNVSCSEASVSK                        | 1506.7712 | IPI0013556C | IPI0013556C | yes | no  |       | 2 0.0063229  | 101.2  |
| IKN(deTTNQIAIHK                           | 1355.8136 | IPI00985989 | IPI00985989 | yes | no  | 2,3   | 0.0030078    | 121.02 |
| IKN(deITDISQK                             | 1158.6608 | IPI00119299 | IPI00119299 | yes | no  | 2,3   | 8.6587E-09   | 152.07 |
| IKN(deATVTQYQIK                           | 1405.7929 | IPI00221547 | IPI00221547 | yes | no  | 2,3   | 2.1963E-05   | 150.46 |
| IKIMESH(dePNGTFSK                         | 1658.845  | IPI00468055 | IPI00468055 | yes | no  | 2,3   | 0.029411     | 68.972 |
| IKIDN(deYSTQEIGR                          | 1535.7944 | IPI00122257 | IPI00122257 | yes | no  | 2,3   | 1.0476E-31   | 190.85 |
| IKGMSETISN(deITQR                         | 1576.8243 | IPI00649911 | IPI00649911 | yes | no  |       | 3 0.0053899  | 104.41 |
| IKEQVVGIIAQNN(deCSCSK                     | 2176.0616 | IPI00122592 | IPI00122592 | yes | yes |       | 3 4.7933E-32 | 185.33 |
| IK(deFIEAGIYEVPIIITDSGNPPKSNISIIR         | 3296.8384 | IPI00323134 | IPI00323134 | yes | no  |       | 4 6.9908E-07 | 88.168 |
| IYISAEDFSIDHSPN(deSTAGPSCSIHQAFRR         | 3580.7256 | IPI0011553C | IPI0011553C | yes | yes |       | 4 0.053249   | 39.388 |
| IYISAEDFSIDHSPN(deSTAGPSCSIHQAFR          | 3424.6245 | IPI0011553C | IPI0011553C | yes | yes | 3,4   | 6.4023E-06   | 77.907 |
| IYGIEN(deTTQEIK                           | 1520.8086 | IPI00309999 | IPI00309999 | no  | no  |       | 2 0.0025592  | 122.97 |
| IY(deEGGDIPDFRKENSSYQVINWR                | 2898.4301 | IPI00153316 | IPI00153316 | yes | yes |       | 3 7.0137E-13 | 112.56 |
| IITN(deNSQTPHSPQEVVSCSPYAQCGDGGFPYIAGK    | 3980.9288 | IPI00130015 | IPI00130015 | yes | yes |       | 4 8.5526E-45 | 136.86 |
| IITHTIEGPSQN(deVTIHIQIPWQDPESWER          | 3414.7208 | IPI0047319C | IPI0047319C | yes | no  | 3,4   | 6.3318E-23   | 126.32 |
| IISQAPSTPSPNMFTINN(deETGDITVAAGIDREK      | 3599.8141 | IPI00323134 | IPI00323134 | yes | no  | 3,4   | 9.9372E-13   | 93.411 |
| IISQAPSTPSPNMFTINN(deETGDITVAAGIDR        | 3342.6766 | IPI00323134 | IPI00323134 | yes | no  | 3,4,5 | 0.0002313    | 59.971 |
| IIVVYIHSNN(deITK                          | 1640.925  | IPI00123194 | IPI00123194 | yes | yes | 2,3   | 4.7463E-10   | 240.46 |
| IITAEHN(deISGAER                          | 1537.7849 | IPI00403938 | IPI00403938 | yes | no  | 2,3   | 5.1406E-70   | 220.85 |
| IQQQSN(deQSSQFIHSVER                      | 2128.0661 | IPI00876541 | IPI00876541 | yes | no  |       | 3 5.7025E-05 | 111.34 |
| IQDFSSDPASN(deITSHSIEKIPSAAPVDHAPR        | 3528.7485 | IPI00170355 | IPI00170355 | yes | no  |       | 4 0.0009637  | 56.366 |
| IPIHIEKPIQN(deFTICFR                      | 2125.1507 | IPI00309214 | IPI00309214 | yes | yes | 2,4   | 0.0019688    | 98.943 |
| IIPAFN(deTTSGIPYPR                        | 1645.8828 | IPI00127672 | IPI00127672 | yes | no  |       | 3 1.5784E-05 | 143.94 |
| IINKFN(deSSSSSIEEK                        | 1681.8523 | IPI00338561 | IPI00338561 | yes | yes | 2,3   | 0.0009866    | 125.97 |
| IINDYVSN(deQTQGMK                         | 1722.8611 | IPI00135635 | IPI00135635 | yes | no  |       | 2 0.0008114  | 103.5  |
| IIN(deTTDVYIIPSNPDGFER                    | 2276.1689 | IPI00130573 | IPI00130573 | yes | yes |       | 2 2.7042E-15 | 152.06 |
| IIN(deQTIRENIKK                           | 1468.8726 | IPI00460063 | IPI00460063 | yes | no  |       | 2 0.01266    | 106.26 |
| IIN(deQTIRENIK                            | 1340.7776 | IPI00460063 | IPI00460063 | yes | no  |       | 2 4.7659E-05 | 148.28 |
| IIN(deQTIR                                | 856.51305 | IPI00460063 | IPI00460063 | yes | no  |       | 2 2.1617E-13 | 150.84 |
| IIN(deQTADMIQIASK                         | 1544.8232 | IPI00126864 | IPI00126864 | yes | no  | 2,3   | 0.0021449    | 102.29 |
| IIN(deITSPEATAK                           | 1256.6976 | IPI00115089 | IPI00115089 | yes | yes |       | 2 0.001281   | 116.24 |
| IIN(deITNPVINQEIEAFSPEDASSSR              | 2890.4349 | IPI00221444 | IPI00221444 | yes | no  | 3,4   | 3.6619E-12   | 110.68 |
| IIN(deITFIDITR                            | 1317.7656 | IPI00343568 | IPI00343568 | yes | no  |       | 2 2.3666E-05 | 147.33 |
| IIN(deHSIIHK                              | 1186.7186 | IPI00406603 | IPI00406603 | yes | yes |       | 2 9.4357E-10 | 158.05 |
| IIN(deETIYENAK                            | 1306.6769 | IPI00153756 | IPI00153756 | yes | yes |       | 2 0.0026659  | 96.604 |
| IIN(deASVIGDHTK                           | 1266.6932 | IPI00116056 | IPI00116056 | yes | yes |       | 3 0.010512   | 72.705 |
| IIMNEGGHYN(deASSGK                        | 1576.7304 | IPI01026847 | IPI01026847 | yes | no  |       | 2 0.002443   | 85.006 |
| IIITAAPN(deITTSPAFRYDIIDVTR               | 2660.4538 | IPI00314726 | IPI00314726 | yes | yes |       | 3 6.1046E-10 | 103.85 |
| IIITAAPN(deITTSPAFR                       | 1684.9512 | IPI00314726 | IPI00314726 | yes | yes |       | 3 0.0058962  | 71.344 |
| IIISPSAFHDGN(deFSIIIR                     | 1999.0891 | IPI00310519 | IPI00310519 | yes | no  |       | 3 2.9303E-05 | 116.43 |
| IIISPEEN(deVTITCTAENQIER                  | 2429.2108 | IPI00121378 | IPI00121378 | yes | no  | 2,3   | 3.1837E-48   | 197.72 |
| IIIPAKN(deTTHIK                           | 1347.8238 | IPI00127556 | IPI00127556 | yes | no  |       | 3 0.0089383  | 86.898 |
| IIIN(deFTSMDIYR                           | 1484.7697 | IPI00125182 | IPI00125182 | yes | no  |       | 2 0.0022383  | 101.89 |
| IIIKAPSHN(deTTEPDPHSISPEIQAIIEVAQHVDVQNGR | 4141.1192 | IPI00165807 | IPI00165807 | yes | no  |       | 4 0.017627   | 41.936 |
| IIGGGDEDAIRPQMQUIIDFETAIAN(deITIPQEKR     | 3779.9516 | IPI0039684C | IPI0039684C | yes | no  | 4,5   | 0.000705     | 58.924 |
| IIGGGDEDAIRPQMQUIIDFETAIAN(deITIPQEK      | 3623.8505 | IPI0039684C | IPI0039684C | yes | no  | 3,4,5 | 5.5328E-35   | 138.36 |
| IIFAN(deVSVR                              | 1017.5971 | IPI00173158 | IPI00173158 | yes | no  | 1,2   | 0.0018437    | 121.73 |
| IIYNYN(deSTK                              | 1243.6085 | IPI00109946 | IPI00109946 | yes | no  |       | 2 0.0062687  | 94.465 |
| IIIFDSTN(deASEGAQPPGKPYPPYSIAK            | 2876.4232 | IPI00459432 | IPI00459432 | yes | yes | 3,4   | 5.3342E-42   | 162.83 |
| IIDQACGTDN(deQTYASSCHIFATK                | 2600.1635 | IPI00308484 | IPI00308484 | yes | yes |       | 3 4.4593E-09 | 108.45 |
| IIDIIPDGYPQISCIPKEEN(deATIATYPEFGVIDIK    | 3932.0169 | IPI00124221 | IPI00124221 | yes | no  |       | 4 2.8241E-06 | 66.083 |
| IIASPNEENM(deTEIISMR                      | 1946.9441 | IPI00322575 | IPI00322575 | yes | no  | 2,3   | 6.9055E-19C  | 203.2  |
| IIASN(deITETMR                            | 1247.6544 | IPI0013260C | IPI0013260C | yes | no  |       | 2 0.013213   | 73.632 |
| IIAN(deISYTIQIDGHR                        | 1712.921  | IPI00894972 | IPI00894972 | yes | no  |       | 3 0.000782   | 104.41 |
| IHYIYQNNFITEIPIESFQN(deATGIR              | 3093.5924 | IPI00122293 | IPI00122293 | yes | yes | 3,4   | 4.3725E-111  | 233.56 |
| IHVAQPEN(deDSHVAIHK                       | 1769.9424 | IPI00850413 | IPI00850413 | yes | yes | 2,3,4 | 1.2325E-57   | 210.14 |
| IHN(deGSEEIAQYK                           | 1458.7103 | IPI00380296 | IPI00380296 | yes | no  |       | 3 0.0039946  | 102.4  |
| IHKDN(deTTCYEFKK                          | 1682.8086 | IPI00119063 | IPI00119063 | yes | yes | 2,3   | 0.038814     | 78.324 |
| IHKDN(deTTCYEFK                           | 1554.7137 | IPI00119063 | IPI00119063 | yes | yes |       | 2 0.0067778  | 98.105 |
| IHIIPSMNPDGYEVAQAQGN(deMSGYIVGR           | 3056.4848 | IPI0012826C | IPI0012826C | yes | yes |       | 3 1.3962E-56 | 184.34 |
| IHIGNYN(deGTAGDAIR                        | 1570.7852 | IPI00310797 | IPI00310797 | yes | yes |       | 2 0.004237   | 78.505 |
| IH(deRINASIADIQSK                         | 1564.8685 | IPI00116913 | IPI00116913 | yes | no  | 2,3   | 0.0036029    | 128.95 |
| IGYDPYANPPNYGNPDPIVIN(deNTHR              | 2810.3412 | IPI0031643C | IPI0031643C | yes | no  | 3,4   | 5.14E-20     | 136.64 |
| IGVTN(deASIVIFRPGSVR                      | 1785.0261 | IPI00652675 | IPI00652675 | yes | yes | 2,3   | 5.1076E-48   | 207.92 |
| IGVQMHPGQEIHN(deFTITGR                    | 2134.0742 | IPI00119299 | IPI00119299 | yes | no  | 2,3,4 | 4.9125E-08   | 123.63 |
| IGPGEPIEHCN(deVSGAIPPPGR                  | 2242.178  | IPI00321348 | IPI00321348 | yes | no  | 3,4   | 5.4522E-19   | 149.73 |
| IGNFSEIATHN(deQTFIKK                      | 1947.0214 | IPI00855103 | IPI00855103 | yes | no  | 2,4   | 0.013278     | 69.935 |
| IGNFSEIATHN(deQTFIK                       | 1818.9264 | IPI00855103 | IPI00855103 | yes | no  | 2,3   | 2.5982E-35   | 199.37 |
| IGN(deWTGEWPETEIVANIWMKQPDAAR             | 3011.46   | IPI00322497 | IPI00322497 | yes | yes |       | 4 0.019127   | 55.734 |



|                                      |           |             |             |     |     |       |            |        |
|--------------------------------------|-----------|-------------|-------------|-----|-----|-------|------------|--------|
| IGN(deWTGEWPEIVEIANIWMK              | 2373.1464 | IPI00322497 | IPI00322497 | yes | yes | 2,3,4 | 1.5404E-53 | 208.49 |
| IGN(deVTTWISSSNPPVTFAAIYWEEDVSGHK    | 3401.6568 | IPI00225072 | IPI00225072 | yes | no  | 3,4   | 0.001292   | 52.707 |
| IGN(deFSEIATHNQTFIKK                 | 1947.0214 | IPI00855103 | IPI00855103 | yes | no  | 2,4   | 0.013278   | 69.935 |
| IGN(deFSEIATHNQTFIK                  | 1818.9264 | IPI00855103 | IPI00855103 | yes | no  | 2,3   | 2.5982E-35 | 199.37 |
| IGN(deETIQR                          | 929.49304 | IPI00322542 | IPI00322542 | yes | yes | 2     | 0.010838   | 111.46 |
| IGIYADVGN(deK                        | 1048.5553 | IPI00123814 | IPI00123814 | yes | no  | 2     | 0.012326   | 81.865 |
| IGISSPTSDFQIEVTPQN(deITINPSSSGSMFSWR | 3582.7301 | IPI00322867 | IPI00322867 | yes | no  | 4     | 2.4019E-24 | 118.57 |
| IGISFNSITVMEN(deGSIANVPHIR           | 2468.2846 | IPI00123196 | IPI00123196 | yes | yes | 3     | 7.2163E-16 | 172.57 |
| IGHTN(deASIMIFEVK                    | 1558.8177 | IPI00858152 | IPI00858152 | yes | yes | 3     | 0.0012601  | 129.54 |
| IGDVEVNAGQN(deATFQCIATGR             | 2220.0593 | IPI00123040 | IPI00123040 | yes | no  | 3     | 0.0022295  | 73.11  |
| IGAINSTISN(deESKEAFIDWAR             | 2321.1652 | IPI00187353 | IPI00187353 | yes | yes | 2,3   | 1.3351E-15 | 140.63 |
| IGAINSTISN(deESK                     | 1332.6885 | IPI00187353 | IPI00187353 | yes | yes | 2     | 0.0027233  | 130.2  |
| IGAINN(deSIIIEDR                     | 1539.8621 | IPI00115516 | IPI00115516 | yes | no  | 3     | 0.0013456  | 125.03 |
| IGAIN(deSTISNESKEAFIDWAR             | 2321.1652 | IPI00187353 | IPI00187353 | yes | yes | 2,3   | 1.3351E-15 | 140.63 |
| IGAIN(deSTISNESK                     | 1332.6885 | IPI00187353 | IPI00187353 | yes | yes | 2     | 0.0027233  | 130.2  |
| IGAGSGPIWIDDIAACNGN(deESAIWDCK       | 2818.2691 | IPI00760106 | IPI00760106 | yes | no  | 3     | 0.0023465  | 61.612 |
| IFISIN(deVTNSPSSQR                   | 1661.8737 | IPI00468674 | IPI00468674 | yes | no  | 2     | 0.010702   | 84.892 |
| IFIFN(deQTGIEAKK                     | 1507.8399 | IPI00378224 | IPI00378224 | yes | yes | 2,3   | 0.0061644  | 89.231 |
| IFIFN(deQTGIEAK                      | 1379.7449 | IPI00378224 | IPI00378224 | yes | yes | 2     | 1.5143E-16 | 178.15 |
| IFFVNP(deAPPYIWPAHKNEIMINSSIMR       | 3184.6354 | IPI00378698 | IPI00378698 | yes | no  | 3,4   | 2.1664E-06 | 88.036 |
| IETIIN(deGTRK                        | 1371.7722 | IPI00119063 | IPI00119063 | yes | no  | 3     | 0.037787   | 67.385 |
| IETIIN(deGTDR                        | 1243.6772 | IPI00119063 | IPI00119063 | yes | no  | 2     | 6.0002E-09 | 160.52 |
| IEPEHIQIQN(deISQEQIAQVATIATK         | 2801.4923 | IPI00165807 | IPI00165807 | yes | no  | 3     | 6.1204E-68 | 209.24 |
| IEN(deITGTGTYTIHAQK                  | 1688.8733 | IPI00222429 | IPI00222429 | yes | yes | 2,3   | 2.9921E-17 | 171.08 |
| IEN(deISSTESGYTATITR                 | 1841.9007 | IPI00111960 | IPI00111960 | yes | no  | 2,3   | 8.2013E-17 | 271.64 |
| IEKIEGIIAN(deVSR                     | 1440.83   | IPI00115516 | IPI00115516 | yes | no  | 2,3   | 0.0042565  | 136.17 |
| IEIVPIIDN(deDSIFVQTDK                | 2221.1518 | IPI00405543 | IPI00405543 | yes | yes | 2,3   | 8.232E-25  | 173.28 |
| IEGVTMFAMGIEGAN(deNTQIEDIVSYPSR      | 3041.4474 | IPI00990932 | IPI00990932 | yes | no  | 3,4   | 0.013839   | 43.895 |
| IEGITN(de)ETZR                       | 1194.5881 | IPI00119299 | IPI00119299 | yes | no  | 2     | 0.0011019  | 114.86 |
| IEGIIAN(de)VSR                       | 1070.6084 | IPI00115516 | IPI00115516 | yes | no  | 2     | 0.010971   | 84.658 |
| IEDRFN(deSTIGPSEEQKNWPGGPR           | 2799.3212 | IPI00115516 | IPI00115516 | yes | no  | 3,4   | 2.7725E-55 | 195.18 |
| IEDRFN(deSTIGPSEEQK                  | 1977.928  | IPI00115516 | IPI00115516 | yes | no  | 2,3   | 4.68E-11   | 159.81 |
| IEDGFHPDAVAWAN(deITNAIR              | 2209.0916 | IPI00165730 | IPI00165730 | yes | no  | 2,3   | 2.8542E-20 | 169.61 |
| IECIHVPAN(deR                        | 1207.6132 | IPI00111456 | IPI00111456 | yes | no  | 2     | 0.014246   | 79.974 |
| IEAYSIEGFPAEQN(deASNR                | 2142.0018 | IPI00114319 | IPI00114319 | yes | yes | 2,3   | 1.1227E-11 | 240.68 |
| IEAVIPAEFFEVSSSQN(deGSYHHR           | 2829.4086 | IPI00342158 | IPI00342158 | yes | no  | 3,4,5 | 2.0906E-29 | 157.98 |
| IDWIGN(deCSGINDDSYGYR                | 2103.8956 | IPI00121550 | IPI00121550 | yes | yes | 2,3   | 2.2198E-48 | 203.26 |
| IDVSQN(deVSSDQDQSCSTK                | 2098.8961 | IPI00120769 | IPI00120769 | yes | no  | 2     | 7.1658E-07 | 120.11 |
| IDVNSWIEN(deFTK                      | 1464.7249 | IPI00626793 | IPI00626793 | yes | no  | 2     | 0.002481   | 97.273 |
| IDSFN(deDSTFMIVYTPITPTQR             | 2546.2363 | IPI00322575 | IPI00322575 | yes | no  | 2     | 3.8385E-21 | 150.91 |
| IDPPCTNTT(deAPSNYINNPYVR             | 2406.1274 | IPI00658539 | IPI00658539 | yes | no  | 2,3   | 1.9398E-09 | 118.54 |
| IDNYS(deTQEIGR                       | 1294.6153 | IPI00122257 | IPI00122257 | yes | no  | 2     | 0.014418   | 72.705 |
| IDKGGITINAN(deISGDAFIK               | 1946.0473 | IPI00134585 | IPI00134585 | yes | no  | 2,3   | 6.6278E-05 | 101.96 |
| IDITDFEKN(deSSFAQYQSFK               | 2267.0746 | IPI00121312 | IPI00121312 | yes | yes | 2,3   | 2.2491E-95 | 231.83 |
| IDIPVNTSIPN(deVTEIK                  | 1751.9669 | IPI00466371 | IPI01026704 | no  | no  | 2,3   | 1.0538E-12 | 168.41 |
| IDIPVN(deTSIPNVTEIK                  | 1751.9669 | IPI00466371 | IPI01026704 | no  | no  | 2,3   | 1.0538E-12 | 168.41 |
| IDGSTN(deFTR                         | 1009.4829 | IPI00310797 | IPI00310797 | yes | yes | 2     | 0.010376   | 98.048 |
| IDGATVDTHHIPVN(deVTIR                | 1957.0381 | IPI00751912 | IPI00751912 | yes | yes | 3     | 0.0036335  | 73.296 |
| IDFIVINE(deTR                        | 1218.6608 | IPI00125813 | IPI00125813 | yes | no  | 2     | 0.0013893  | 111.63 |
| IDETDCIGN(deWTWQEGSQQTIK             | 2508.1227 | IPI00122973 | IPI00122973 | yes | no  | 2,3   | 4.3589E-31 | 175.52 |
| IDCYPDEHGASEAN(deCSAR                | 2050.8109 | IPI00848693 | IPI00848693 | yes | yes | 2,3   | 5.2648E-09 | 147.17 |
| IDAYNEAAVSIIN(deSSTR                 | 1822.9061 | IPI00380296 | IPI00380296 | yes | yes | 2,3   | 1.4937E-08 | 147.06 |
| IDAPTNIQFVN(deETDRTVIVTWTPPR         | 2882.4927 | IPI00113539 | IPI00113539 | yes | no  | 3,4   | 1.9523E-13 | 111.49 |
| IDAPTNIQFVN(deETDR                   | 1731.8428 | IPI00113539 | IPI00113539 | yes | no  | 2,3   | 4.3825E-46 | 209.66 |
| ICQN(deISKK                          | 989.5328  | IPI00126184 | IPI00126184 | yes | yes | 2     | 7.4537E-05 | 131.06 |
| ICQN(deISK                           | 861.43784 | IPI00126184 | IPI00126184 | yes | yes | 2     | 0.028066   | 85.265 |
| ICN(deECSDGSFHISK                    | 1652.6923 | IPI00515360 | IPI00515360 | yes | no  | 2     | 0.0022416  | 93.494 |
| ICHTHGWN(deETSEIMPPGAVFSCIYR         | 2961.336  | IPI00122399 | IPI00122399 | yes | no  | 3     | 0.0090373  | 55.734 |
| ICEGDRFCIIDVMSTGSSSVGN(deATR         | 2731.2364 | IPI00749655 | IPI00749655 | yes | no  | 3     | 2.4183E-06 | 90.912 |
| ICDYENHFN(deTSK                      | 1526.646  | IPI00757830 | IPI00757830 | yes | no  | 2,3   | 0.0031424  | 87.667 |
| IAYSNN(deGSDWK                       | 1253.5677 | IPI00123996 | IPI00123996 | yes | yes | 2     | 0.01075    | 76.927 |
| IAVTN(deTTMTGTVIK                    | 1448.7909 | IPI00108041 | IPI00108041 | yes | yes | 2     | 1.0277E-23 | 186.05 |
| IAVDWESIGYNI(deTR                    | 1635.8257 | IPI00123040 | IPI00123040 | yes | no  | 2,3   | 4.0835E-16 | 170.66 |
| IATIAN(deFSEIGIEPGR                  | 1686.8941 | IPI00129041 | IPI00129041 | yes | no  | 3     | 0.0018703  | 89.541 |
| IASPPSQGEVPPGPIPEAVIAIYN(deSTR       | 2759.4494 | IPI00114457 | IPI00114457 | yes | yes | 3,5   | 0.0006896  | 67.88  |
| IASAVQKN(deATSTK                     | 1317.7252 | IPI00400016 | IPI00400016 | yes | no  | 2     | 0.011081   | 102.28 |
| IAQEGGAAAIAN(deNSVIIPSSR             | 2264.2488 | IPI00121776 | IPI00121776 | yes | yes | 2,3,4 | 8.9385E-12 | 124.86 |
| IAPASN(deVSHTVVIRPIK                 | 1801.0574 | IPI00467180 | IPI00467180 | yes | yes | 2,3,4 | 2.2171E-10 | 239.58 |
| IAPASN(deVSHTVVIR                    | 1462.8256 | IPI00467180 | IPI00467180 | yes | yes | 3     | 0.0013634  | 112.08 |
| IAN(deFSQSCTIYSGDDIVEAIPKPCPGCPR     | 3251.505  | IPI00114958 | IPI00114958 | yes | no  | 3,4   | 7.0966E-38 | 156.41 |
| IAN(deETGGHGSGR                      | 1251.5956 | IPI00309230 | IPI00309230 | yes | no  | 2,3   | 3.7686E-23 | 183.96 |
| IAMCQNIGYN(deVTK                     | 1510.7272 | IPI00117094 | IPI00117094 | yes | yes | 2     | 2.436E-06  | 151.99 |
| IAIYNSRFIN(deICSEMDGRVR              | 2413.1995 | IPI00153749 | IPI00153749 | yes | yes | 3     | 0.0066687  | 99.044 |
| IAITPAHIIFIADN(deHTEPAAHFR           | 2554.3445 | IPI00230324 | IPI00230324 | yes | no  | 3,4   | 4.343E-09  | 108.56 |
| IAISFPN(deITSDGYVVIPTGWSSSDNVNCRPR   | 3582.7202 | IPI00466371 | IPI01026704 | no  | no  | 3,4,5 | 3.4647E-16 | 101.5  |
| IAIN(deITMYIK                        | 1178.6733 | IPI00134585 | IPI00134585 | yes | yes | 2     | 0.0053382  | 96.113 |
| IACIN(deGTVIR                        | 1115.6121 | IPI00134808 | IPI00134808 | yes | no  | 2     | 7.4627E-20 | 180.07 |
| I(deNHCKFDEFFSQGCAPGYEKNSTICDICIGPIK | 3904.7681 | IPI00987951 | IPI00987951 | yes | no  | 4     | 5.9604E-11 | 93.176 |
| I(deAVISGCKNTTSAAMVHCIR              | 2188.0915 | IPI00131216 | IPI00131216 | yes | yes | 2,3,4 | 1.4623E-05 | 108.45 |
| HYQVTGYGING(deTGDSNDFWR              | 2286.009  | IPI00221669 | IPI00221669 | yes | no  | 2     | 3.4602E-05 | 98.443 |
| HYAN(deITNGMYR                       | 1338.6139 | IPI00224073 | IPI00224073 | yes | no  | 2     | 0.0015015  | 116.03 |
| HVVIN(deGSSFGADGFPYVQVIK             | 2233.1532 | IPI00742377 | IPI00742377 | yes | no  | 2,3   | 1.0415E-09 | 119.8  |
| HVEDKFN(deETTQR                      | 1502.7114 | IPI00130654 | IPI00130654 | yes | no  | 2,3   | 7.9247E-16 | 176.18 |
| HTIEIAPN(deSTAR                      | 1308.6786 | IPI00620800 | IPI00620800 | yes | no  | 2     | 0.003136   | 87.719 |
| HTGPGIISMANAGPNTN(deGSQFFICTAK       | 2790.3218 | IPI00554989 | IPI00554989 | yes | yes | 3     | 2.6531E-10 | 98.766 |
| HTDDITSIN(deNTIVNIR                  | 1824.933  | IPI00129304 | IPI00129304 | yes | yes | 2,3   | 2.073E-25  | 185.95 |

|                                          |           |                         |     |     |       |   |            |        |
|------------------------------------------|-----------|-------------------------|-----|-----|-------|---|------------|--------|
| HSVPVFCPSFYND(deDTDFIGEEIDIVDK           | 3278.523  | IPI0041628E IPI0041628E | yes | yes |       | 4 | 0.0006676  | 64.954 |
| HSVIWNAMIHQIN(deMTIK                     | 2132.1023 | IPI00111794 IPI00111794 | yes | no  | 2,3   |   | 0.0001138  | 103.6  |
| HSQQPIITYEKYN(deVTDTPK                   | 2261.1328 | IPI0032241E IPI0032241E | yes | yes | 3,4   |   | 6.1321E-19 | 167.28 |
| HSIEHFNN(deNTDHSHTIR                     | 2318.0941 | IPI0011495E IPI0011495E | yes | no  | 3,4   |   | 1.1835E-12 | 144.97 |
| HPGNFSSISCDYFAVN(deQSR                   | 2184.9647 | IPI0011597E IPI0011597E | yes | yes | 2,3   |   | 3.588E-08  | 126.07 |
| HPGN(deFSSISCDYFAVNQSR                   | 2184.9647 | IPI0011597E IPI0011597E | yes | yes | 2,3   |   | 3.588E-08  | 126.07 |
| HNN(deDTQHIWESDSNEFSVIADPR               | 2710.2008 | IPI0012952E IPI0012952E | yes | no  | 2,3,4 |   | 2.0174E-13 | 200.99 |
| HN(de)ITITQGK                            | 1010.5509 | IPI0012835E IPI0012835E | yes | no  |       | 2 | 0.0045495  | 112.71 |
| HMQN(deITEEQPIEVK                        | 1694.8298 | IPI0075674E IPI0075674E | yes | no  |       | 2 | 0.001319   | 123.76 |
| HIWSIEISNKPN(deISEPEEPK                  | 2346.1856 | IPI0013057E IPI0013057E | yes | yes |       | 3 | 0.0033261  | 82.007 |
| HIVFWN(deSSNPK                           | 1327.6673 | IPI0013075E IPI0013075E | yes | no  |       | 2 | 0.0033679  | 93.345 |
| HISN(deDTTTPPESTMTVGQAR                  | 2044.9484 | IPI0087630E IPI0087630E | yes | yes | 2,3   |   | 5.6991E-08 | 122.44 |
| HISFGEDYPGIVNPIDHTN(deVTAPQASMMFQYFVK    | 3852.828  | IPI0062655E IPI0062655E | yes | no  | 3,4,5 |   | 3.2629E-20 | 110.55 |
| HIN(deITISVAGGFR                         | 1484.81   | IPI0085041E IPI0085041E | yes | yes |       | 2 | 3.8317E-16 | 171.26 |
| HIN(deASNPSEPATIIIFTAAR                  | 2009.033  | IPI00421157 IPI00421157 | yes | yes | 2,3   |   | 1.1941E-11 | 240.13 |
| HIIEN(deATASVSEAERK                      | 1753.8959 | IPI0039684C IPI0039684C | yes | no  | 2,3   |   | 1.3579E-10 | 239.61 |
| HIIEN(deATASVSEAER                       | 1625.8009 | IPI0039684C IPI0039684C | yes | no  | 2,3   |   | 2.3191E-72 | 228.38 |
| HGQIIKN(deFTIIQGGPPGPR                   | 1972.1007 | IPI00129304 IPI00129304 | yes | yes |       | 3 | 1.4738E-08 | 147.12 |
| HGHFTGFN(deGSTIR                         | 1429.6851 | IPI0011798E IPI0011798E | yes | yes | 2,3   |   | 0.015692   | 68.809 |
| HGFYCYIIGSTISTFTDAN(deHTCTNEK            | 3036.3382 | IPI0012618E IPI0012618E | yes | yes |       | 3 | 2.8291E-67 | 200.29 |
| HFN(deDSGACVPR                           | 1258.5513 | IPI00468814 IPI00468814 | yes | yes |       | 2 | 0.010987   | 76.655 |
| HFKGQTQN(deYSTIIIEASER                   | 2350.1553 | IPI0012466E IPI0012466E | yes | no  | 2,3   |   | 3.1601E-13 | 252.05 |
| HFFN(deVSDEIAIVTIVK                      | 1830.988  | IPI00466371 IPI00466371 | no  | no  | 2,3   |   | 6.5042E-19 | 179.74 |
| HEN(deNTKDNSIQHEFSITR                    | 2169.0199 | IPI00109727 IPI00109727 | yes | yes | 2,3   |   | 6.5714E-07 | 135.23 |
| HEEGHMINC(deTCFGQGR                      | 1931.7825 | IPI0011353E IPI0011353E | yes | no  | 2,3   |   | 0.0013427  | 94.717 |
| HDYIIIEGAIITN(deTTR                      | 1812.937  | IPI00121421 IPI00121421 | yes | no  |       | 2 | 0.0001931  | 118.47 |
| HDVFCGFICTN(deITR                        | 1851.876  | IPI0064828E IPI0064828E | yes | no  |       | 3 | 0.0009529  | 101.53 |
| HDPN(deMTCDYVIK                          | 1491.6486 | IPI0011929E IPI0011929E | yes | no  |       | 2 | 0.0021946  | 102.4  |
| HAN(deWTITPIK                            | 1179.64   | IPI0031735E IPI0031735E | yes | yes | 2,3   |   | 9.6956E-11 | 160.36 |
| HAIEYFNN(deNTGSHSHIFAIR                  | 2240.0875 | IPI0040020E IPI0040020E | yes | no  |       | 3 | 0.0004429  | 89.866 |
| HAEISFVITDGVVTGN(deDSIEESVHSMR           | 2976.3924 | IPI00621027 IPI00621027 | yes | yes |       | 4 | 0.0001605  | 75.773 |
| GYPYNGTNYVN(deVTMHIR                     | 1997.9418 | IPI0022281E IPI0022281E | yes | yes | 2,3   |   | 0.0019276  | 99.044 |
| GYPCCGN(deKTASSVIEITCAK                  | 2111.998  | IPI00308971 IPI00308971 | yes | yes |       | 3 | 0.0016636  | 87.16  |
| GYNSS(deQDIPSIVIDFVK                     | 1880.952  | IPI0012466E IPI0012466E | yes | yes | 2,3   |   | 3.4773E-37 | 195.77 |
| GYNPVTKN(deVTVR                          | 1346.7306 | IPI0013057E IPI0013057E | yes | yes |       | 2 | 0.0034482  | 130.1  |
| GYITSFEMFN(deSTFK                        | 1670.765  | IPI00262024 IPI00262024 | yes | no  | 2,3   |   | 7.5602E-14 | 264.29 |
| GYIITINFTKN(deTTR                        | 1640.8886 | IPI0046921E IPI0046921E | yes | yes | 2,3   |   | 4.0089E-21 | 296.22 |
| GYIITIN(deFTKNTR                         | 1640.8886 | IPI0046921E IPI0046921E | yes | yes | 2,3   |   | 4.0089E-21 | 296.22 |
| GYIITIN(deFTK                            | 1168.6492 | IPI0046921E IPI0046921E | yes | yes |       | 2 | 2.8507E-88 | 231.42 |
| GWKENPVFDSIFN(deESK                      | 2024.948  | IPI0012907C IPI0012907C | yes | no  | 2,3   |   | 6.8917E-20 | 173.37 |
| GWIN(deGSIVGFYK                          | 1339.6925 | IPI0013458E IPI0013458E | yes | no  |       | 2 | 1.4929E-59 | 194.24 |
| GVEITHNN(deK                             | 1173.5778 | IPI0037863E IPI0037863E | yes | no  | 2,3   |   | 6.6253E-12 | 133.81 |
| GVVSDDIPIN(deVSR                         | 1484.7471 | IPI0012952E IPI0012952E | yes | no  |       | 2 | 1.0588E-23 | 186.05 |
| GVTSSQIFHSPDIAIRDTYVN(deASQSIYGSSPR      | 3551.7645 | IPI00122977 IPI00122977 | yes | no  |       | 4 | 0.0009367  | 56.533 |
| GVTNDIISVQNGTGPSWIN(deKTEK               | 2457.25   | IPI0034468E IPI0034468E | yes | yes | 2,3,4 |   | 8.8846E-12 | 186.06 |
| GVTHIN(deISGIKMPR                        | 1521.845  | IPI0011906E IPI0011906E | yes | yes |       | 3 | 0.0035809  | 125.97 |
| GVTHIN(deISGIK                           | 1137.6506 | IPI0011906E IPI0011906E | yes | yes | 2,3   |   | 6.2281E-16 | 203.61 |
| GVSSSEN(deFTSPVMEFWERR                   | 2244.027  | IPI0046665E IPI0046665E | yes | no  |       | 3 | 1.5129E-10 | 138.91 |
| GVSSSEN(deFTSPVMEFWER                    | 2087.9259 | IPI0046665E IPI0046665E | yes | no  | 2,3   |   | 9.8578E-29 | 188.04 |
| GVQIIVFPEDGIHGFN(deFTR                   | 2145.1007 | IPI0032137E IPI0032137E | yes | no  | 2,3,4 |   | 1.27E-16   | 160.43 |
| GVNVITVN(deATDADSK                       | 1502.7577 | IPI00623114 IPI00623114 | yes | no  |       | 2 | 7.2415E-25 | 185.26 |
| GVN(deVTMPSQPGVPPISSTQIQIDPAIQEFQIVDISRR | 4017.0994 | IPI0051536C IPI0051536C | yes | no  | 3,4   |   | 2.0776E-08 | 73.227 |
| GVN(deVTMPSQPGVPPISSTQIQIDPAIQEFQIVDISR  | 3860.9982 | IPI0051536C IPI0051536C | yes | no  | 3,4,5 |   | 1.4546E-19 | 106.44 |
| GVN(deETIIVNEIK                          | 1327.7347 | IPI0033801E IPI0033801E | yes | no  |       | 2 | 0.0012273  | 128.95 |
| GVIPGEDWTVFQSN(deHSTYEPVIAK              | 2786.3915 | IPI0040418E IPI0040418E | yes | no  | 2,3,4 |   | 0.0001739  | 77.631 |
| GVIMVGN(deETTYEDGHGARKNITDIVEGAK         | 3073.5139 | IPI0064918E IPI0064918E | yes | no  |       | 3 | 0.042133   | 55.881 |
| GVIMVGN(deETTYEDGHGARK                   | 2032.9636 | IPI0064918E IPI0064918E | yes | no  |       | 3 | 0.05641    | 54.281 |
| GVIMVGN(deETTYEDGHGAR                    | 1904.8687 | IPI0064918E IPI0064918E | yes | no  | 2,3   |   | 1.2115E-10 | 245.19 |
| GVIDKDPCSVIPSDYDIFIN(deISR               | 2622.3    | IPI0013227E IPI0013227E | yes | yes |       | 3 | 2.27E-08   | 104.84 |
| GVFITNE(deTGQPIIGK                       | 1572.8512 | IPI0011196C IPI0011196C | yes | no  | 2,3   |   | 2.9172E-14 | 260.96 |
| GVDSCHGDSGGAFQVFN(deVTVPK                | 2445.1383 | IPI0065367E IPI0065367E | yes | no  |       | 3 | 1.0257E-05 | 84.946 |
| GVDIDAPYYNYIISFTVPDIDN(deVTVIDYDAR       | 3535.7035 | IPI0011906E IPI0011906E | yes | yes | 3,4   |   | 1.3323E-34 | 137.24 |
| GVAVTN(deTSQIGFR                         | 1348.7099 | IPI0047108E IPI0047108E | yes | no  |       | 2 | 5.4347E-86 | 233.59 |
| GV(deIMVGNETTYEDGHGARKNITDIVEGAK         | 3073.5139 | IPI0064918E IPI0064918E | yes | no  |       | 3 | 0.042133   | 55.881 |
| GTFTDCAIANM(deTQQIR                      | 1825.8451 | IPI00621027 IPI00621027 | yes | no  | 2,3   |   | 3.2039E-19 | 279.44 |
| GTEVN(deATVIGESDPIDEVQGFIFGK             | 2621.2861 | IPI00762897 IPI00762897 | yes | yes | 2,3   |   | 1.0968E-16 | 259.6  |
| GTDPSISPSAATPPAPGAEISYIN(deHTFR          | 2950.4461 | IPI00762091 IPI00762091 | yes | yes | 3,4   |   | 9.4528E-23 | 124    |
| GTCEQGSPSIVTPPKDIWN(deVTGAK              | 2454.2213 | IPI00652107 IPI00652107 | yes | no  |       | 3 | 2.6893E-11 | 124.31 |
| GTAGNAIMDGASQIVGEN(de)R                  | 1859.8796 | IPI0027907E IPI0027907E | yes | yes | 2,3   |   | 0          | 308.02 |
| GSYEIAANGEDTDVKITNSPQNQN(deITVPR         | 3358.6277 | IPI0040660E IPI0040660E | yes | yes |       | 3 | 8.1032E-34 | 133.27 |
| GSTQYIENIGFN(deMSK                       | 1687.7876 | IPI0011610E IPI0011610E | yes | yes | 2,3   |   | 2.1164E-06 | 149.86 |
| GSPGN(deASQGSIHHSPIAIQADPR               | 2537.2735 | IPI00114044 IPI00114044 | yes | yes | 2,3,4 |   | 2.5083E-08 | 100.28 |
| GSPAN(deVTEAR                            | 1000.4938 | IPI0080842E IPI0080842E | yes | no  |       | 2 | 0.0097104  | 94.465 |
| GNNNSGHDN(deHSQFVR                       | 1654.7196 | IPI00330594 IPI00330594 | yes | yes | 2,3   |   | 1.5793E-05 | 144.29 |
| GSNFN(deISKTDNIEECQK                     | 1982.9004 | IPI00113057 IPI00113057 | yes | yes | 2,3   |   | 2.8548E-10 | 248.13 |
| GSNFN(deISK                              | 865.42938 | IPI00113057 IPI00113057 | yes | yes |       | 2 | 0.0025563  | 120.99 |
| GSN(deNSGHDNHSQFVR                       | 1654.7196 | IPI00330594 IPI00330594 | yes | yes | 2,3   |   | 1.5793E-05 | 144.29 |
| GSN(deFTAICVIK                           | 1208.6223 | IPI0012015E IPI0012015E | yes | yes |       | 2 | 2.6444E-07 | 156.36 |
| GSIQSANDISSQTQGFQHSMDN(deISAQIQTVR       | 3460.6641 | IPI00330594 IPI00330594 | yes | yes | 3,4   |   | 4.6466E-60 | 175.59 |
| GSIN(deVSYNIGPGFTGSEYSR                  | 2103.9861 | IPI0011304E IPI0011304E | yes | no  | 2,3   |   | 5.1911E-25 | 300.74 |
| GSEVEDEDIEIFN(deTSVQIRPPSTAPGPETAFFIER   | 3800.8381 | IPI00381357 IPI00381357 | yes | no  | 3,4   |   | 6.9911E-73 | 178.95 |
| GSAIPHPNSN(deATWEIK                      | 1606.8104 | IPI0011929E IPI0011929E | yes | no  | 2,3   |   | 2.0579E-05 | 141.85 |
| GRADECAIPYIGATCYCIDFCN(deR               | 2781.1768 | IPI0011545E IPI0011545E | yes | no  |       | 3 | 3.2366E-11 | 122.94 |
| GQTQNYST(deIIIEASER                      | 1937.933  | IPI0012466E IPI0012466E | yes | no  | 2,3   |   | 7.1316E-48 | 202.16 |
| GQTGIGFIYASGIVN(deSSQAK                  | 2054.0433 | IPI0013114E IPI0013114E | yes | no  | 2,3   |   | 4.459E-48  | 196.78 |
| GQQQVIPIPIVPIVIVSIVGSASN(deTSR           | 2741.544  | IPI00162831 IPI00162831 | yes | yes | 3,4   |   | 1.7298E-18 | 115.36 |

|                                              |           |             |             |     |     |     |   |             |        |
|----------------------------------------------|-----------|-------------|-------------|-----|-----|-----|---|-------------|--------|
| GQNQPVIN(deITNR                              | 1352.7161 | IPI0011190E | IPI0011190E | yes | no  |     | 2 | 0.0010771   | 139.48 |
| GQAQSDAAGIPGAESRN(deDSIPGAGSEADGIEGK         | 3111.4341 | IPI00317487 | IPI00317487 | yes | yes | 3,4 |   | 1.6384E-34  | 133.61 |
| GPPGVN(deGTQGFQGCPCGQR                       | 1812.8326 | IPI0083074E | IPI0083074E | yes | yes | 2,3 |   | 5.7206E-15  | 162.46 |
| GPNKIQC(deVDGNWTTIPVCIEEER                   | 2714.2792 | IPI0013001C | IPI0013001C | yes | no  |     | 3 | 4.0254E-09  | 111.49 |
| GPN(deFTSPASITFTTGKPPQDIEAK                  | 2616.3435 | IPI0045841E | IPI0045841E | yes | no  |     | 3 | 6.9277E-08  | 100.28 |
| GPMNQCIVATGIDVIGN(deR                        | 1913.9452 | IPI0011847E | IPI0011847E | yes | yes |     | 3 | 3.2022E-06  | 121.82 |
| GPGIKPN(deQTSK                               | 1125.6142 | IPI0022142E | IPI0022142E | yes | yes |     | 2 | 1.0052E-16  | 179.19 |
| GPFDSFVVQYQDTEN(deETQAIIVDGDQDKVIISGIEPK     | 4094.0008 | IPI0045841E | IPI0045841E | yes | no  | 4,5 |   | 7.1994E-08  | 71.623 |
| GPECSQNY(deTAPTGVIK                          | 1720.809  | IPI0012399E | IPI0012399E | yes | yes |     | 2 | 9.4561E-26  | 188.27 |
| GPDISN(deCTSHWVNQIAQK                        | 2053.964  | IPI0087655E | IPI0087655E | yes | no  |     | 3 | 3.8392E-28  | 182.02 |
| GPCSHICIINYN(deR                             | 1602.7395 | IPI0011906E | IPI0011906E | yes | yes | 2,3 |   | 0.0030016   | 109.44 |
| GNYGWQAGN(deHSAFWGMTIDEGR                    | 2566.1448 | IPI0011545E | IPI0011545E | yes | no  | 2,3 |   | 2.2862E-39  | 185.61 |
| GN(deTTAIDKEIAR                              | 1287.6783 | IPI0010853E | IPI0010853E | no  | no  | 2,3 |   | 2.3472E-06  | 155.48 |
| GN(deTTAIDK                                  | 818.4134  | IPI0010853E | IPI0010853E | no  | no  |     | 2 | 0.049839    | 70.056 |
| GN(deSTIAVPK                                 | 885.49198 | IPI0080829E | IPI0080829E | yes | no  |     | 2 | 9.1054E-17  | 162.36 |
| GN(deSSIVPVVSPSIQQIVIEK                      | 2157.1681 | IPI0098598E | IPI0098598E | yes | no  | 2,3 |   | 2.2593E-11  | 245.66 |
| GN(deQSSQWIYEAMAK                            | 1611.7351 | IPI0013779E | IPI0013779E | yes | yes |     | 2 | 5.1167E-05  | 148.03 |
| GN(deMTWYAAGK                                | 1097.4964 | IPI0012095E | IPI0012095E | yes | yes |     | 2 | 0.0002008   | 127.42 |
| GN(deITIER                                   | 801.43447 | IPI0027901C | IPI0027901C | yes | no  |     | 2 | 0.0045245   | 120.46 |
| GN(deITEYQCHQYITK                            | 1753.8094 | IPI0012239E | IPI0012239E | yes | no  | 2,3 |   | 6.3374E-56  | 212.39 |
| GN(deISTEKFVEEIK                             | 1492.7773 | IPI00466371 | IPI01026704 | no  | no  |     | 2 | 0.008835    | 88.021 |
| GN(deHSIFGIEVATIGQGPDPCSVNER                 | 2653.2555 | IPI0045943E | IPI0045943E | yes | yes |     | 3 | 6.8895E-111 | 236.38 |
| GN(deGSCVCHAGWQGIR                           | 1657.7202 | IPI0098726E | IPI0098726E | yes | no  |     | 2 | 0.000487    | 120.66 |
| GMVIDENSNN(deITGAVISVTGINHDVTSGEHGDYFR       | 3717.7329 | IPI0012826C | IPI0012826C | yes | yes |     | 4 | 4.1096E-19  | 102.57 |
| GMSETISNIT(deQR                              | 1335.6453 | IPI00649911 | IPI00649911 | yes | no  |     | 2 | 0.0014164   | 111.79 |
| GMNYN(deSSVVK                                | 1097.5175 | IPI0041628E | IPI0041628E | yes | yes |     | 2 | 4.1388E-07  | 141.08 |
| GKSN(deQTECFNFIR                             | 1599.7464 | IPI0089086E | IPI0089086E | yes | yes |     | 2 | 0.0096446   | 83.087 |
| GKNN(deQTECFNHVR                             | 1602.7321 | IPI0012466E | IPI0012466E | yes | no  | 2,3 |   | 0.0041205   | 136.7  |
| GKIYWDGDNISMANMDG(deSNHTIIFSGQK              | 3199.4703 | IPI0011906E | IPI0011906E | yes | yes |     | 4 | 8.8661E-07  | 87.511 |
| GKIYWDGDN(deISMANMDGSNHTIIFSGQK              | 3199.4703 | IPI0011906E | IPI0011906E | yes | yes |     | 4 | 8.8661E-07  | 87.511 |
| GIYHIN(deITVGGIPFK                           | 1627.9086 | IPI0011553E | IPI0011553E | yes | yes |     | 3 | 0.0067009   | 72.496 |
| GIWKIPFSPENTREEDFYVN(deETSTVK                | 3085.5033 | IPI0011610E | IPI0011610E | yes | yes | 3,4 |   | 3.7633E-10  | 101.6  |
| GIVSGGVYNHSHVGCIPYTIPPEHHVN(deGSRPPCTGEGDTPR | 4430.0379 | IPI00113517 | IPI00113517 | yes | yes | 4,5 |   | 7.4643E-05  | 56.288 |
| GIVMNYPHITN(deITTIGQSVEYR                    | 2505.2686 | IPI0013057E | IPI0013057E | yes | yes |     | 3 | 1.7704E-39  | 188.96 |
| GISYQIIGN(deHSK                              | 1315.6884 | IPI00623114 | IPI00623114 | yes | no  | 2,3 |   | 0.0011066   | 128.54 |
| GISPGN(deYSVR                                | 1048.5302 | IPI0012835E | IPI0012835E | yes | no  |     | 2 | 0.0047069   | 97.813 |
| GIPDQKVN(deFTCK                              | 1405.7024 | IPI0012915E | IPI0012915E | yes | no  |     | 2 | 0.0072347   | 93.011 |
| GINIT(deEDTYKPR                              | 1405.7201 | IPI0011980E | IPI0011980E | yes | yes | 2,3 |   | 2.8061E-69  | 223.31 |
| GINCN(deISR                                  | 932.4498  | IPI0013656E | IPI0013656E | yes | no  |     | 2 | 0.0020797   | 122.52 |
| GIMVGN(deGSVIGVVQAVDAETGK                    | 2100.0885 | IPI0034215E | IPI0034215E | yes | no  | 2,3 |   | 6.5019E-14  | 250.05 |
| GIMIIIN(deDTQHFSNNVKEIGQFYR                  | 2893.4545 | IPI00312711 | IPI00312711 | yes | no  |     | 3 | 1.0531E-14  | 120.71 |
| GIMIIIN(deDTQHFSNNVK                         | 1942.9935 | IPI00312711 | IPI00312711 | yes | no  | 2,3 |   | 2.1892E-27  | 184.02 |
| GIIN(deATISVAEINHPVTTYK                      | 2140.1528 | IPI0013057E | IPI0013057E | yes | yes | 2,3 |   | 3.887E-114  | 242.98 |
| GIIGISN(deATIWYWHIPDTAYPGIYR                 | 2690.3857 | IPI00458077 | IPI00458077 | yes | yes |     | 3 | 5.7732E-08  | 99.86  |
| GIIGHNN(deKSSASFR                            | 1486.7641 | IPI0016287C | IPI0016287C | yes | yes | 2,3 |   | 0.006242    | 96.464 |
| GIIGHNN(deK                                  | 851.46135 | IPI0016287C | IPI0016287C | yes | yes |     | 2 | 0.0043223   | 119.21 |
| GIFPDGSHEISGN(deTSITPDK                      | 2070.9858 | IPI00894972 | IPI00894972 | yes | no  |     | 3 | 4.1683E-06  | 109.87 |
| GIDWYMEFFPIPSN(deTTSDFYFEK                   | 2833.2622 | IPI0040418E | IPI0040418E | yes | yes |     | 3 | 0.012975    | 56.304 |
| GIAN(deISNFIR                                | 1103.6087 | IPI0012915E | IPI0012915E | yes | no  |     | 2 | 1.0169E-25  | 183.03 |
| GIAEVTEN(deVTEGGVTK                          | 1602.8101 | IPI00130271 | IPI00130271 | yes | no  |     | 2 | 1.0126E-88  | 237.46 |
| GHVDPAN(deDTFDIDPR                           | 1667.754  | IPI00453501 | IPI00453501 | yes | no  |     | 2 | 0.0014288   | 95.236 |
| GHTDRCDEAQAIQVWN(deDTHPEVISQKPFDK            | 3520.643  | IPI0010800E | IPI0010800E | yes | no  |     | 4 | 0.0006927   | 62.605 |
| GHIIAQVATNPQGITGTGN(deTTSEMDPSHRK            | 3230.6102 | IPI0032137E | IPI0032137E | yes | no  |     | 4 | 0.012604    | 47.225 |
| GHIIAQVATNPQGITGTGN(deTTSEMDPSHR             | 3102.5153 | IPI0032137E | IPI0032137E | yes | no  | 3,4 |   | 4.472E-67   | 182.19 |
| GHICN(deQTQNIQSSK                            | 1613.758  | IPI0098788E | IPI0098788E | yes | yes | 2,3 |   | 0.001371    | 115.12 |
| GHFYYN(deISDVR                               | 1369.6415 | IPI0013556C | IPI0013556C | yes | no  | 2,3 |   | 0.0009257   | 109.6  |
| GHAIGISCQSEN(deGTAPITYHIMK                   | 2484.189  | IPI00406901 | IPI00406901 | yes | no  | 3,4 |   | 1.8335E-49  | 199.41 |
| GHAHIAIVNHDSYN(deFSHR                        | 2145.0253 | IPI0013336E | IPI0013336E | yes | no  | 3,4 |   | 3.1444E-10  | 132.84 |
| GGTVEYTN(deEKHTIEIAPNSTAR                    | 2387.1717 | IPI0062080C | IPI0062080C | yes | no  |     | 3 | 0.016083    | 63.447 |
| GGITINANISG(deDAFIK                          | 1589.8413 | IPI0013458E | IPI0013458E | yes | no  |     | 2 | 0.0094219   | 88.133 |
| GGIN(deITAVTVTAENDHTVAFIGTSDGR               | 2715.3464 | IPI00405742 | IPI00405742 | yes | no  |     | 3 | 3.5819E-22  | 123.36 |
| GGGGPWAN(deGSAIAICQR                         | 1670.7947 | IPI00453501 | IPI00453501 | yes | no  |     | 2 | 0.003925    | 73.498 |
| GFQWVTGDN(deHTSYSR                           | 1753.7808 | IPI0012942E | IPI0012942E | yes | yes |     | 2 | 8.3888E-25  | 184.48 |
| GFPQIIGAAGN(deVSAGSVIIR                      | 1926.0687 | IPI0075485E | IPI0075485E | yes | no  |     | 3 | 7.1797E-13  | 143.28 |
| GFN(deATYHVR                                 | 1063.5199 | IPI0041102E | IPI0041102E | yes | yes | 2,3 |   | 0.0030181   | 117.7  |
| GFN(deASYIR                                  | 926.46102 | IPI0046196E | IPI0046196E | yes | yes |     | 2 | 0.015895    | 95.099 |
| GFGVAFVGN(deYTGSIPNEAAINTVR                  | 2453.2339 | IPI00165807 | IPI00165807 | yes | no  |     | 3 | 8.8995E-06  | 99.409 |
| GFDTYFGYIIGSEDYTHEACAPIESIN(deGTR            | 3545.5722 | IPI0065235E | IPI0065235E | yes | no  |     | 3 | 1.1125E-39  | 141.36 |
| GETASIICN(deISVR                             | 1418.7188 | IPI0032134E | IPI0032134E | yes | no  |     | 2 | 5.128E-23   | 181.71 |
| GENPSQYGITAFNHPIN(deITK                      | 2200.0913 | IPI00112614 | IPI00112614 | yes | yes |     | 3 | 3.1387E-08  | 121.26 |
| GEIQSEN(deSSITISSNR                          | 1807.8548 | IPI00466371 | IPI01026704 | no  | no  | 2,3 |   | 2.7028E-91  | 235.75 |
| GEIN(deSTIFSSRPK                             | 1434.7467 | IPI0046006E | IPI0046006E | yes | no  | 2,3 |   | 5.7899E-32  | 194.98 |
| GEIN(deSTIFSSR                               | 1209.599  | IPI0046006E | IPI0046006E | yes | no  |     | 2 | 0.01639     | 71.241 |
| GECYYTN(deGTQR                               | 1347.5514 | IPI0011091C | IPI0011091C | yes | no  |     | 2 | 4.0506E-33  | 197.07 |
| GDTHTQIIEGIQFN(deITQTSEADIHK                 | 2795.3726 | IPI0040630E | IPI0040630E | no  | no  | 3,4 |   | 7.3685E-12  | 193.42 |
| GDSGGAIVFIDN(deETQR                          | 1677.7958 | IPI0046706E | IPI0046706E | yes | no  |     | 2 | 1.6982E-25  | 186.72 |
| GDRN(deITWR                                  | 1016.5152 | IPI0022142E | IPI0022142E | yes | yes | 2,3 |   | 0.0033912   | 126.07 |
| GDN(deQSPIEHTK                               | 1337.6575 | IPI0022189C | IPI0022189C | yes | yes | 2,3 |   | 0.0013258   | 136.93 |
| GDHHQISHYN(deITGVR                           | 1732.8394 | IPI0033820E | IPI0033820E | yes | no  | 2,3 |   | 0.0003931   | 112.96 |
| GDHGAN(deFSCR                                | 1119.4516 | IPI0012297E | IPI0012297E | yes | no  |     | 2 | 5.9184E-06  | 136.96 |
| GDGPFTVFPVPHADIISN(deMSQDEIAR                | 2715.2963 | IPI0098726E | IPI0098726E | yes | no  |     | 3 | 1.6193E-29  | 158.52 |
| GDEKEN(deITAEIDISIK                          | 1844.9367 | IPI0012472E | IPI0012472E | yes | no  | 2,3 |   | 0           | 200.67 |
| GDDIYTNV(deTVSIVEAIVGFEMDITHIDGHK            | 3287.602  | IPI00320241 | IPI00320241 | yes | yes |     | 4 | 1.3212E-53  | 165.13 |
| GCKDNA(deTDSVPIR                             | 1431.6776 | IPI0011906E | IPI0011906E | yes | yes | 2,3 |   | 1.2718E-42  | 202.29 |
| GCHVN(deECISR                                | 1230.5234 | IPI0011906E | IPI0011906E | yes | yes |     | 2 | 0.0022305   | 106.29 |
| GCADYCNQ(deTITKR                             | 1585.6977 | IPI0098726E | IPI0098726E | yes | no  |     | 2 | 0.018287    | 73.386 |

|                                           |           |             |             |     |     |       |   |             |        |
|-------------------------------------------|-----------|-------------|-------------|-----|-----|-------|---|-------------|--------|
| GAYPVFFN(deFTR                            | 1317.6506 | IPI0030832E | IPI0030832E | yes | yes |       | 2 | 0.0074186   | 88.441 |
| GATISHHNIVN(deNSMIIGQR                    | 2061.0538 | IPI0012263C | IPI0012263C | yes | yes | 2,3   |   | 5.4705E-06  | 117.26 |
| GAIQIPTVSFSHEESN(deTTAIAEFGEYIRK          | 3194.5884 | IPI0022407C | IPI0022407C | yes | yes | 3,4   |   | 0.0006118   | 66.017 |
| GAIQIPTVSFSHEESN(deTTAIAEFGEYIR           | 3066.4934 | IPI0022407C | IPI0022407C | yes | yes |       | 3 | 5.3721E-23  | 129.23 |
| GAIDIMIQVN(deMTPGHSSAPPK                  | 2163.0816 | IPI0022407C | IPI0022407C | yes | yes | 2,3,4 |   | 2.8404E-25  | 162.77 |
| GAGEVSPAESHSSKPTN(deISAK                  | 1965.9756 | IPI0023071E | IPI0023071E | yes | no  | 2,3   |   | 1.7055E-41  | 194.27 |
| GAFVSKNPCN(deITREDYAPIVK                  | 2378.2053 | IPI0030796E | IPI0030796E | yes | yes |       | 3 | 1.5229E-37  | 180.78 |
| GAFVSKNPCN(deITR                          | 1462.7351 | IPI0030796E | IPI0030796E | yes | yes | 2,3   |   | 0.0041199   | 136.38 |
| GAFISN(deFTMTVNGMTFTSSIK                  | 2253.081  | IPI0097043E | IPI0097043E | yes | no  | 2,3   |   | 3.3539E-26  | 169.51 |
| GAFFPIKEDN(deWSIPNR                       | 1889.9424 | IPI0013556C | IPI0013556C | yes | no  | 2,3   |   | 0.0002452   | 129.38 |
| GAAAPSAPHWN(deETAEEK                      | 1635.7641 | IPI0064828E | IPI0064828E | yes | no  |       | 3 | 0.0044743   | 74.789 |
| FYPEDIQIIWIENGNVSRNDTPKN(deITK            | 3203.6251 | IPI0012915E | IPI0012915E | yes | no  | 3,4   |   | 2.2042E-16  | 119.79 |
| FYPEDIQIIWIENGNVSRN(deDTPKNITK            | 3203.6251 | IPI0012915E | IPI0012915E | yes | no  | 3,4   |   | 2.2042E-16  | 119.79 |
| FYPEDIQIIWIENGN(deVSRNDTPKNITK            | 3203.6251 | IPI0012915E | IPI0012915E | yes | no  | 3,4   |   | 2.2042E-16  | 119.79 |
| FYPEDIQIIWIENGN(deVSR                     | 2192.0902 | IPI0012915E | IPI0012915E | yes | no  | 2,3   |   | 0.0029295   | 78.234 |
| FYFGSPISPQYAN(deFTGCISNAYFTR              | 2964.3541 | IPI0022344E | IPI0022344E | yes | yes |       | 3 | 0.0007571   | 69.27  |
| FVPNSNMN(deFTGQAYSGR                      | 1888.8526 | IPI0010853E | IPI0010853E | no  | no  | 2,3   |   | 0           | 235.71 |
| FVN(deSTGYITEAEK                          | 1457.7038 | IPI00153187 | IPI00153187 | yes | yes |       | 3 | 0.0092215   | 73.466 |
| FVFMEEGSN(deKTVEPR                        | 1768.8454 | IPI00133074 | IPI00133074 | yes | yes | 2,3   |   | 0.0044346   | 92.265 |
| FVFMEEGSN(deK                             | 1186.5329 | IPI00133074 | IPI00133074 | yes | yes |       | 2 | 0.016505    | 77.379 |
| FTQDAYSAVVKEN(deSTEAR                     | 2014.9596 | IPI00623114 | IPI00623114 | yes | no  |       | 2 | 1.3984E-11  | 159.95 |
| FTFSTHTPGEHQICIHNSN(deSTK                 | 2428.123  | IPI0047368C | IPI0047368C | yes | no  | 2,3,4 |   | 9.2099E-25E | 222.3  |
| FTFSTHTPGDHDQICIHNSN(deSTR                | 2442.1135 | IPI0015346E | IPI0015346E | yes | no  | 2,3,4 |   | 3.2512E-48  | 197.67 |
| FTCN(deQTTDVIIIHSK                        | 1775.8876 | IPI0031950E | IPI0031950E | yes | yes | 2,3   |   | 1.2483E-87  | 231.06 |
| FTAPDTIFAN(deGSVYPPNEGFCPCR               | 2716.205  | IPI01008227 | IPI01008227 | yes | no  | 2,3,4 |   | 6.5147E-33  | 161.66 |
| FSVN(deQTTIITHEK                          | 1516.7886 | IPI0084869C | IPI0084869C | yes | yes | 2,3   |   | 8.0167E-07  | 157.86 |
| FSPPVVN(deVTWIR                           | 1413.7769 | IPI0011080E | IPI0011080E | yes | no  |       | 3 | 0.0005311   | 137.89 |
| FMSDITYDIQDVIADVGIKDIFTN(deQSDFADTTK      | 3699.7138 | IPI0011610E | IPI0011610E | yes | no  | 3,4   |   | 3.6283E-60  | 176.7  |
| FSHN(deGTCAAEGK                           | 1277.5459 | IPI0032067E | IPI0032067E | yes | yes |       | 2 | 0.00156     | 110.38 |
| FSGAN(deDTDFR                             | 1128.4836 | IPI0022166E | IPI0022166E | yes | no  |       | 2 | 1.2376E-05  | 132.32 |
| FSEIIVNN(deATEEIIVK                       | 1817.9775 | IPI0032119C | IPI0032119C | yes | no  |       | 2 | 1.0236E-34  | 197.15 |
| FSATEVPEKGAGEVSP(deAEHSSKPTNISAK          | 2954.4621 | IPI0023071E | IPI0023071E | yes | no  | 3,4   |   | 7.7413E-56  | 186.96 |
| FS(deAIIGHYNRGNISTEK                      | 2019.0538 | IPI00466371 | IPI01026704 | no  | no  |       | 3 | 0.02928     | 65.374 |
| FQSAAGAIQEASEAYIVGIFEDTN(deICAIHAK        | 3436.6973 | IPI0098957E | IPI0098957E | yes | no  |       | 3 | 5.3679E-40  | 143.27 |
| FQISPQIQFSPEEVIGMVIN(deYSR                | 2681.3523 | IPI0012334E | IPI0012334E | yes | no  |       | 3 | 0           | 244.91 |
| FQIIN(deFSSSEIK                           | 1411.7347 | IPI0085672C | IPI0085672C | yes | no  |       | 2 | 0.0007018   | 136.3  |
| FPVPFQKENV(deTATIVEIGR                    | 2144.163  | IPI00134691 | IPI00134691 | yes | yes |       | 3 | 2.2666E-08  | 129.88 |
| FNSTE(deYQVVTR                            | 1342.6517 | IPI0011906C | IPI0011906C | yes | no  | 2,3   |   | 7.9994E-17  | 177.81 |
| FN(deVSIIYGR                              | 1067.5764 | IPI0032067E | IPI0032067E | yes | yes |       | 2 | 0.012994    | 94.297 |
| FN(deTTSINVGSSSYFPEHGYFR                  | 2322.0705 | IPI00263041 | IPI00263041 | yes | no  |       | 3 | 3.6248E-05  | 98.227 |
| FN(deITETPEADIHQGFNGIISQPEDQDQINIGNAMFIEK | 4601.202  | IPI0013183C | IPI0013183C | yes | no  | 4,5,6 |   | 4.8552E-08  | 63.625 |
| FN(deETRDITISVSDINVR                      | 2079.0596 | IPI0099093E | IPI0099093E | yes | yes |       | 3 | 1.0761E-06  | 131.4  |
| FMISGYN(deFSVMENMPAISVGMVTVIDGDKGENAR     | 3775.7718 | IPI00719927 | IPI00719927 | yes | no  |       | 4 | 0.0005572   | 51.871 |
| FMGIPTKDDNIEHYKN(deSTVMAR                 | 2566.2308 | IPI0012392E | IPI0012392E | yes | no  |       | 3 | 0.0013455   | 84.493 |
| FMFFVQFPHN(deATQTMNIR                     | 2228.0659 | IPI0013651C | IPI0013651C | yes | yes |       | 3 | 0.0020616   | 76.151 |
| FITDVERN(deETAIYHVEAFK                    | 2281.1379 | IPI0046673C | IPI0046673C | yes | no  | 2,3   |   | 3.0276E-41  | 195.23 |
| FIRPFMQYN(deSTR                           | 1558.7715 | IPI0013628C | IPI0013628C | yes | yes |       | 3 | 0.0034008   | 116.55 |
| FIQSAEFFN(deYTVR                          | 1620.7936 | IPI0012740E | IPI0012740E | yes | yes | 2,3   |   | 5.8655E-16  | 174.39 |
| FINYN(deQTVSR                             | 1240.62   | IPI0022693E | IPI0022693E | yes | no  |       | 2 | 0.0004849   | 122.69 |
| FINHTVGN(deKTK                            | 1257.683  | IPI0011122E | IPI0011122E | yes | yes |       | 2 | 0.012404    | 89.805 |
| FINHTVGN(deK                              | 1028.5403 | IPI0011122E | IPI0011122E | yes | yes |       | 2 | 0.026397    | 78.934 |
| FINFFVGNTIN(deSSYPPGYSIHSISVR             | 2915.4606 | IPI0013042C | IPI0013042C | yes | no  |       | 3 | 5.837E-17   | 128.38 |
| FIN(deISSTGIR                             | 1106.6084 | IPI0013189E | IPI0013189E | yes | yes |       | 2 | 0.0069252   | 93.058 |
| FIN(deHTVGNKTK                            | 1257.683  | IPI0011122E | IPI0011122E | yes | yes |       | 2 | 0.012404    | 89.805 |
| FIN(deHTVGNK                              | 1028.5403 | IPI0011122E | IPI0011122E | yes | yes |       | 2 | 0.026397    | 78.934 |
| FIIKGPN(deKIQCVDGNWTTIPVCIEEER            | 3215.6107 | IPI0013001C | IPI0013001C | yes | no  |       | 3 | 0.0068213   | 64.589 |
| FIFKN(deQTIEIHVIYGPR                      | 2074.1364 | IPI0012297C | IPI0012297C | yes | no  | 2,3,4 |   | 1.528E-47   | 203.9  |
| FIEYVTSECHFYN(deGTQHVR                    | 2386.0801 | IPI0047458C | IPI0047458C | yes | no  | 2,3,4 |   | 3.3585E-06  | 115.8  |
| FIEPYN(deDSIQAQK                          | 1551.7569 | IPI00123704 | IPI00123704 | yes | yes |       | 2 | 0.0025167   | 121.04 |
| FIASFNVVN(deTTKR                          | 1495.8147 | IPI0062257E | IPI0062257E | yes | no  | 2,3   |   | 0.0026803   | 136.93 |
| FI(deEAGIYEVPIITDSGNPPKSNISIR             | 3055.6594 | IPI00323134 | IPI00323134 | yes | no  | 3,4   |   | 1.2868E-42  | 167.59 |
| FHVN(deYTQPIVAVK                          | 1514.8245 | IPI00123704 | IPI00123704 | yes | no  | 2,3   |   | 0.0025808   | 118.24 |
| FHVHQPVTQPFIVQVTN(deTTVK                  | 2320.2328 | IPI00658311 | IPI00658311 | yes | no  | 2,3,4 |   | 1.5484E-85  | 199.01 |
| FGYIIHTDN(deR                             | 1234.6095 | IPI0047520E | IPI0047520E | yes | no  |       | 2 | 0.000687    | 119.53 |
| FGTCSQICN(deNTK                           | 1428.6126 | IPI0011906C | IPI0011906C | yes | yes | 2,3   |   | 1.6069E-23  | 186.16 |
| FGN(deETFIIHIDNGR                         | 1631.8056 | IPI0017035E | IPI0017035E | yes | yes | 2,3   |   | 9.7405E-07  | 153.39 |
| FGHSPIIN(deITGGISHASDVVIYHQK              | 2826.4565 | IPI0011906C | IPI0011906C | yes | yes | 3,4,5 |   | 3.7752E-20  | 131.56 |
| FGEFGN(deYSIIVQHASSGANK                   | 2125.0229 | IPI0031748E | IPI0031748E | yes | no  | 2,3   |   | 3.3571E-66  | 218.25 |
| FFPYAN(deGTISIR                           | 1384.7139 | IPI0011576E | IPI0011576E | yes | no  |       | 2 | 0.0035691   | 84.169 |
| FFN(deDSIVDPVDSEWFGFYR                    | 2339.0535 | IPI0033131E | IPI0033131E | yes | no  | 2,3   |   | 1.8978E-25  | 178.72 |
| FDEVYDAIAGAHPN(deITVYK                    | 2122.0371 | IPI0011116C | IPI0011116C | yes | no  |       | 2 | 4.3244E-15  | 154.19 |
| FDAAGTSVHGGVPQN(deGSICAHIPMIK             | 2663.2948 | IPI0031553E | IPI0031553E | yes | yes | 3,4   |   | 3.7546E-20  | 131.33 |
| FCNIVPTEHCFIGN(deGTEYR                    | 2313.0307 | IPI00227857 | IPI00227857 | yes | yes |       | 3 | 2.2706E-10  | 135.09 |
| FAVESIVPSSISIMHSPPDAQN(deMSEVSISPMEISTFR  | 4019.9319 | IPI00114044 | IPI00114044 | yes | yes | 3,4,5 |   | 4.3897E-15  | 98.76  |
| FAQPQWHIHINGTFSN(deETEPDTEPCVDGWVYDR      | 4057.833  | IPI0022634E | IPI0022634E | yes | no  |       | 4 | 7.5106E-05  | 60.029 |
| FAQPQWHIHINGTFSN(deGTFSNETEPDTEPCVDGWVYDR | 4057.833  | IPI0022634E | IPI0022634E | yes | no  |       | 4 | 7.5106E-05  | 60.029 |
| FAPPEAPEPWSG(deVRDGTSPQAICPQNVTMNMEGIK    | 3810.7804 | IPI00320204 | IPI00320204 | yes | yes |       | 4 | 0.0003845   | 54.732 |
| FANEYPN(deITR                             | 1223.5935 | IPI0013057C | IPI0013057C | yes | yes |       | 2 | 0.0006997   | 119.39 |
| FAIKDYR(dePSAGNNSIYQDTVVFK                | 2745.4126 | IPI0032246C | IPI0032246C | yes | no  |       | 3 | 8.6085E-05  | 83.063 |
| FAEIN(deGSAICSYNIKPSYTTITSK               | 2692.3054 | IPI00421237 | IPI00421237 | yes | no  |       | 3 | 9.6131E-06  | 89.483 |
| F(deDEFFSQGCAPGYEKNSTICIGPIK              | 3252.4566 | IPI00987951 | IPI00987951 | yes | no  | 3,4   |   | 3.1145E-48  | 175.28 |
| F(deAPPQPAEPWSSVKNATTYPPMCSQDAAR          | 3203.4805 | IPI0012839E | IPI0012839E | yes | yes |       | 3 | 7.9084E-10  | 92.886 |
| F(deAPPQPAEPWSFVKNATSYPPMCSQDAGWAK        | 3464.5958 | IPI0013834E | IPI0013834E | yes | yes |       | 4 | 0.0072712   | 50.857 |
| EYEGAVYPDN(deTTDFQR                       | 1903.8224 | IPI00605187 | IPI00605187 | yes | no  | 2,3   |   | 1.2439E-27  | 190.19 |
| EWN(deGTYHCIFR                            | 1481.651  | IPI00876541 | IPI00876541 | yes | no  | 2,3   |   | 0.0032615   | 93.839 |
| EWIPIN(deHSVNSVVVR                        | 1747.937  | IPI0022475E | IPI0022475E | yes | yes | 2,3   |   | 3.4783E-05  | 140.27 |

|                                           |           |             |             |     |     |       |             |        |
|-------------------------------------------|-----------|-------------|-------------|-----|-----|-------|-------------|--------|
| EVTVIGVATAPTQVISNGIPVSN(deFTYSPDNK        | 3217.6507 | IPI0011196C | IPI0011196C | yes | yes | 3,4,5 | 0.0005205   | 58.812 |
| EVNVYMYIANGSAFN(deISNK                    | 2133.0201 | IPI00222967 | IPI00222967 | yes | no  | 2,3   | 7.5049E-32  | 182.49 |
| EVNVYMYIAN(deGSAFNISNK                    | 2133.0201 | IPI00222967 | IPI00222967 | yes | no  | 2,3   | 7.5049E-32  | 182.49 |
| EVNSQIDNNGCSTQEVN(deITEIQSKK              | 2834.3352 | IPI0012322C | IPI0012322C | yes | yes | 3     | 0.037878    | 62.099 |
| EVNSQIDNNGCSTQEVN(deITEIQSK               | 2706.2403 | IPI0012322C | IPI0012322C | yes | yes | 2,3,4 | 7.5524E-56  | 195.15 |
| EVN(deKTCEAIIFK                           | 1450.749  | IPI0011511E | IPI0011511E | yes | yes | 2,3   | 0.0003315   | 145.17 |
| EVMN(deFTAENIYK                           | 1457.6861 | IPI0017000E | IPI0017000E | yes | no  | 2     | 0.0025862   | 91.62  |
| EVHFFVN(deASDVDSVK                        | 1691.8155 | IPI0031004E | IPI0031004E | yes | yes | 2,3   | 6.1402E-05  | 138.91 |
| ETYIETN(de)YTIK                           | 1373.6715 | IPI0012015E | IPI0012015E | yes | yes | 2     | 0.0052592   | 86.344 |
| ETYFN(de)SKK                              | 1128.5815 | IPI0015325E | IPI0015325E | yes | no  | 2,3   | 1.295E-08   | 147.95 |
| ETVITFIDPEGSQVDTIEGNN(deITGIASFDFEIPSNPK  | 4090.9899 | IPI0040554C | IPI0040554C | yes | yes | 4     | 4.4703E-40  | 128.22 |
| ETIIEHDQRQEEYEIISFADTDISSIN(deQTR         | 3579.6965 | IPI0013651C | IPI0013651C | yes | yes | 3     | 1.3981E-33  | 131.04 |
| ETFIIN(deTTCVK                            | 1324.6697 | IPI0013819E | IPI0013819E | yes | yes | 2     | 0.0003352   | 129.34 |
| ESYIISN(deSTMK                            | 1384.6908 | IPI0012392E | IPI0012392E | yes | no  | 2     | 0.002146    | 102.97 |
| ESSEHPWK(deWTDNTEYNNTIPIRGEER             | 3187.4595 | IPI0027643C | IPI0027643C | yes | yes | 3,4   | 2.2656E-10  | 105.46 |
| ESQTIGDQCVYN(deSTHIGFQR                   | 2339.0601 | IPI0011813C | IPI0011813C | yes | yes | 2,3   | 5.48E-156   | 268.25 |
| ESQIN(deITVMAKPTNWIEGTR                   | 2287.1631 | IPI0031140E | IPI0031140E | yes | yes | 2,3   | 2.6818E-05  | 103.4  |
| ESQIN(deITVMAK                            | 1232.6435 | IPI0031140E | IPI0031140E | yes | yes | 2     | 0.001157    | 106.49 |
| ESNPITAQQT(deKIDAPTNIQFVNETDR             | 3030.4894 | IPI0011353E | IPI0011353E | yes | no  | 3     | 5.1228E-06  | 86.08  |
| ESIIPVTIQCND(deITSSHTIMYSYWTR             | 3086.4841 | IPI00757771 | IPI00757771 | yes | no  | 3     | 0.0016789   | 63.165 |
| ESGIQN(deVSTCR                            | 1249.5721 | IPI01008227 | IPI01008227 | yes | no  | 2     | 0.0010656   | 107.97 |
| ESGIN(deMTIPEENQPVFNHIYNIK                | 2785.3745 | IPI0040393E | IPI0040393E | yes | no  | 3     | 4.8026E-33  | 163.79 |
| ERVEN(deTSQPGEMQVTIQNIMPATVYIFK           | 3222.6053 | IPI0012915E | IPI0012915E | yes | no  | 3     | 2.3178E-37  | 151.18 |
| ERTEVIIQGTVS(dePNASAPDAVWEDYEYFK          | 3150.5146 | IPI00405437 | IPI00405437 | yes | no  | 3     | 1.7629E-13  | 106.11 |
| ERSN(deNTPDANVAPEVTVISR                   | 2168.0822 | IPI0011080E | IPI0011080E | yes | no  | 3     | 0.0009494   | 89.374 |
| EREDVQAIN(deISVPYGPPIEDFQR                | 2671.3242 | IPI01023131 | IPI01023131 | yes | no  | 3     | 4.0418E-09  | 111.45 |
| EQYIHEN(deYSR                             | 1337.6    | IPI0012740E | IPI0012740E | yes | no  | 2,3   | 0.0025621   | 104.24 |
| EQSFQGSN(deMTIFYR                         | 1706.7723 | IPI00453571 | IPI00453571 | yes | no  | 2     | 3.2884E-41  | 149.22 |
| EQN(deYTCHVYHEGIEPEPITIR                  | 2455.159  | IPI00608044 | IPI00608044 | yes | no  | 2,3,4 | 7.3712E-80  | 221.47 |
| EQN(deYTCHVNHEGIEPEPITIR                  | 2406.1386 | IPI0031298C | IPI0031298C | yes | no  | 3     | 0.0046615   | 69.422 |
| EQN(de)YTCR                               | 969.39743 | IPI0010999E | IPI0010999E | yes | no  | 2     | 0.0075334   | 107.57 |
| EQN(de)YTCHVHHK                           | 1451.6364 | IPI00850057 | IPI00850057 | yes | no  | 2,3   | 4.1449E-07  | 153.95 |
| EIQGIN(deASSAAWAR                         | 1600.7958 | IPI0011691C | IPI0011691C | yes | no  | 2     | 0.000385    | 112.3  |
| EQIN(de)SIDHR                             | 1223.6258 | IPI00127407 | IPI00127407 | yes | no  | 2,3   | 0.0059755   | 95.094 |
| EQETCIAPEIEHGNY(deSTTQR                   | 2362.0496 | IPI00122117 | IPI00122117 | yes | yes | 3     | 6.3342E-13  | 144.17 |
| EQESMMN(deITIHIVK                         | 1671.8324 | IPI00990932 | IPI00990932 | yes | no  | 3     | 0.0015725   | 89.959 |
| EQEN(deSTIYISFTPK                         | 1655.8043 | IPI00894972 | IPI00894972 | yes | no  | 2     | 0.0023331   | 90.561 |
| ENS(deSYQVINWR                            | 1394.6579 | IPI0015331E | IPI0015331E | yes | yes | 2     | 2.2523E-24  | 188.91 |
| ENQN(deHSYSIK                             | 1218.5629 | IPI0012024E | IPI0012024E | yes | no  | 2     | 0.015982    | 78.342 |
| ENPGHIYNKN(de)SQK                         | 1640.8271 | IPI0012217E | IPI0012217E | yes | no  | 2     | 0.0039985   | 110.38 |
| ENIIDISN(deASK                            | 1202.6143 | IPI0085785E | IPI0085785E | yes | no  | 2     | 0.0026961   | 96.464 |
| ENGVD(deAVHPGYGFISER                      | 1845.8646 | IPI00943457 | IPI00943457 | yes | no  | 2,3   | 0.0017706   | 87.287 |
| EN(deMTFGSTIVTNP                          | 1537.7446 | IPI00466371 | IPI01026704 | no  | no  | 2     | 1.6173E-10  | 160.8  |
| EN(de)SDPTSPIRR                           | 1383.7106 | IPI0013692E | IPI0013692E | yes | no  | 2     | 0.0064102   | 86.772 |
| EN(de)SDPTSPIR                            | 1227.6095 | IPI0013692E | IPI0013692E | yes | no  | 2     | 0.0052755   | 86.288 |
| EN(deGTFISKYEGGVETFAHIIVIR                | 2466.2543 | IPI0011813C | IPI0011813C | yes | yes | 3,4   | 8.3002E-86  | 224.86 |
| EN(de)NSIHWK                              | 1026.4883 | IPI0012322C | IPI0012322C | yes | no  | 2     | 0.040779    | 74.92  |
| EMN(deCSETISQIQK                          | 1566.7018 | IPI00459134 | IPI00459134 | yes | no  | 2,3   | 0.0002827   | 143.93 |
| EMIHN(deATFCIVPR                          | 1586.7698 | IPI0012553C | IPI0012553C | yes | no  | 2     | 0.0033893   | 83.087 |
| EMGNTVMDIIRNYTAN(deATSSR                  | 2343.0947 | IPI0010809E | IPI0010809E | yes | no  | 3     | 2.2524E-05  | 96.391 |
| EMGNTVMDIIRN(deYTANATSSR                  | 2343.0947 | IPI0010809E | IPI0010809E | yes | no  | 3     | 2.2524E-05  | 96.391 |
| EKVQSIQTIA(deANNSAIK                      | 1885.0269 | IPI00129304 | IPI00129304 | yes | yes | 3     | 3.4288E-20  | 170.78 |
| EKVEN(deGSETGPIPEIQPIIEGEVK               | 2688.3858 | IPI00136012 | IPI00136012 | yes | yes | 2,3,4 | 1.7541E-15  | 121.38 |
| EKSCVAITDAFP(deQNMSR                      | 1952.9084 | IPI00405742 | IPI00405742 | yes | no  | 2,3   | 8.2829E-06  | 128.71 |
| EKEDRPFHQAV(deVNDTQAFWHNK                 | 2695.2891 | IPI00406901 | IPI00406901 | yes | no  | 3,4   | 0.0036028   | 80.752 |
| EIYESIWQN(deFTDSK                         | 1758.8101 | IPI0027269C | IPI0027269C | yes | yes | 2     | 0.0013788   | 118.2  |
| EIVSDPIYVEVQGIPYFIKQPESVN(deVTR           | 3218.6863 | IPI00121254 | IPI00121254 | yes | yes | 3,4   | 1.8178E-09  | 91.729 |
| EIVHQSND(deTSNIFFSPVSIATAFAMISIGSK        | 3195.6274 | IPI00406302 | IPI00406302 | no  | no  | 3,4   | 4.1469E-27E | 218.93 |
| EITGIRN(de)SSQEGSTDVVAR                   | 2131.0869 | IPI0067739E | IPI0067739E | yes | no  | 2,3   | 7.6945E-80  | 226.57 |
| EIQIAGFDPSQDSIGPKNN(deDSTINNSATTIIIGIQDCR | 4101.9913 | IPI0088174E | IPI0088174E | yes | no  | 4     | 0.0116      | 44.167 |
| EIPVIN(deV)SIGPFSTSQVVAR                  | 2112.1579 | IPI00515432 | IPI00515432 | yes | no  | 2,3   | 1.6935E-10  | 131.65 |
| EIN(de)SICPVSTSER                         | 1731.8461 | IPI0038130C | IPI0038130C | yes | yes | 2,3   | 1.0026E-24  | 183.36 |
| EIKGDGPFTVFPVPHADI(de)SNMSQDEIAR          | 3085.5179 | IPI0098726E | IPI0098726E | yes | no  | 3     | 3.5116E-37  | 150.94 |
| EIIYSN(deGSIIIFQMITMK                     | 1987.0159 | IPI0010853E | IPI0010853E | no  | no  | 2,3   | 6.9607E-17E | 269.49 |
| EIIVHPN(de)YTR                            | 1240.6564 | IPI0011375C | IPI0011375C | yes | yes | 2,3   | 1.3797E-18  | 175.15 |
| EIIVDEIISN(deSSTIASYK                     | 1981.0256 | IPI00173181 | IPI00173181 | yes | no  | 2,3   | 4.1602E-28  | 181.34 |
| EIISN(deASDAIDKIR                         | 1543.8206 | IPI0055492E | IPI0012952E | no  | no  | 2     | 0.013148    | 105.99 |
| EIIMDFAN(deSSAEITACMVR                    | 2156.9904 | IPI0022170E | IPI0022170E | yes | yes | 3     | 3.0686E-09  | 130.4  |
| EIHIIQEQN(deVSNV)FIDKEEFFIGSK             | 2986.4825 | IPI00605187 | IPI00605187 | yes | no  | 3,4   | 6.8947E-20  | 138.82 |
| EIGPIYTN(de)TADIGTDPR                     | 1944.9793 | IPI0031490C | IPI0031490C | yes | yes | 2,3   | 0.0031003   | 76.378 |
| EIGGAIDSGAAYVIEQASSHIGN(deSTQAAVR         | 2971.4635 | IPI0045839C | IPI0045839C | yes | no  | 3     | 0.0008265   | 57.735 |
| EIGAIYN(deCSNIAQDIEK                      | 2050.0041 | IPI0022141E | IPI0022141E | yes | no  | 2,3   | 5.5237E-12E | 252.83 |
| EIEYYVQGSFANAMYND(de)ACR                  | 2284.9881 | IPI0013260C | IPI0013260C | yes | yes | 3     | 6.7886E-06  | 110.84 |
| EIAAAN(de)ESAVK                           | 1172.6037 | IPI0011372E | IPI0011372E | yes | no  | 2     | 0.0019295   | 106.17 |
| EHSIFIDIHPVTGIPMN(de)CSVK                 | 2393.1872 | IPI01008227 | IPI01008227 | yes | no  | 2,3   | 1.6757E-15  | 139.88 |
| EGTYSIPTSN(deFTVPDIEIPSWISTGNYR           | 3143.5088 | IPI0011909E | IPI0011909E | yes | yes | 2,4   | 3.5167E-26  | 133.58 |
| EGSRTDDEVVQREEEAIQI(de)DGINASQIR          | 3156.5283 | IPI0012952E | IPI0012952E | yes | yes | 3,4   | 1.1324E-42  | 169.41 |
| EGPRNISTCFSSGDIFAAHN(de)ISER              | 2664.2351 | IPI0012342E | IPI0012342E | yes | no  | 3     | 4.2599E-46  | 185.71 |
| EGPRN(de)ISTCFSSGDIFAAHNISER              | 2664.2351 | IPI0012342E | IPI0012342E | yes | no  | 3     | 4.2599E-46  | 185.71 |
| EGN(deFTSTFDKK                            | 1272.5986 | IPI0015325E | IPI0015325E | yes | yes | 2,3   | 3.1942E-07  | 158.01 |
| EGN(deCSAQSGIAWQDCDFKDAEEAATGECTATVGR     | 3818.6207 | IPI0011495E | IPI0011495E | yes | no  | 4     | 2.795E-09   | 83.834 |
| EGN(deCSAQSGIAWQDCDFKDAEEAATGECTATVGR     | 3662.5196 | IPI0011495E | IPI0011495E | yes | no  | 4     | 4.3005E-06  | 65.244 |
| EGN(deCSAQSGIAWQDCDFK                     | 2071.8364 | IPI0011495E | IPI0011495E | yes | no  | 2,3   | 4.9004E-05  | 112.82 |
| EGKFDEYDAIAGA(de)HPNITVYKK                | 2564.2911 | IPI0011116C | IPI0011116C | yes | no  | 3,4   | 1.552E-14   | 134.29 |
| EGKFDEYDAIAGA(de)HPNITVYK                 | 2436.1961 | IPI0011116C | IPI0011116C | yes | no  | 3,4   | 1.371E-58   | 203.89 |
| EGFSAN(deYSVIQSSISEDFFK                   | 2106.9746 | IPI0012399E | IPI0012399E | yes | yes | 2,3   | 3.6719E-19  | 165.19 |



|                                          |           |             |             |     |     |       |   |             |        |
|------------------------------------------|-----------|-------------|-------------|-----|-----|-------|---|-------------|--------|
| EGDN(deTIQICIGNGNPPPEEFMFYIPGQPEGIR      | 3588.6654 | IPI0012137E | IPI0012137E | yes | no  |       | 4 | 0.0025185   | 52.721 |
| EGASEEETN(deISK                          | 1292.5732 | IPI0013834E | IPI0013834E | yes | yes |       | 2 | 0.0001173   | 145.29 |
| EFVENSECIQCHPECIPQAMN(deITCTGR           | 3279.3876 | IPI0012119C | IPI0012119C | yes | no  | 3,4   |   | 1.5201E-48  | 175.86 |
| EFQHN(deSTMYK                            | 1446.6238 | IPI0078844E | IPI0078844E | yes | no  | 2,3   |   | 0.0022739   | 98.105 |
| EEQFN(deSTFR                             | 1156.5149 | IPI0047524E | IPI0047524E | yes | no  | 1,2   |   | 5.4597E-14  | 159.83 |
| EEN(de)ATIATYPEFGVIDIK                   | 2008.9993 | IPI00124221 | IPI00124221 | yes | no  | 2,3   |   | 1.6157E-10E | 243.95 |
| EEIGTYPYTPTGEPVFGGIPQN(deASIVTHIAHTFQDIK | 4190.0637 | IPI00453571 | IPI00453571 | yes | no  |       | 4 | 3.1487E-14  | 82.726 |
| EEAMIYHN(deQTSEIR                        | 1719.7886 | IPI0075627E | IPI0075627E | yes | no  | 2,3   |   | 0.0013156   | 124.09 |
| EDTVTITCEGTHNPGN(deSSTQWFHNGR            | 2944.2794 | IPI0012948E | IPI0012948E | yes | no  |       | 3 | 4.8151E-80  | 211.43 |
| EDSCQINY(deSEGPCIGMQR                    | 2271.9195 | IPI0012735E | IPI0012735E | yes | yes | 2,3   |   | 1.3685E-41  | 193.85 |
| EDRPFHQAVVN(deDTQAFWHNK                  | 2438.1516 | IPI00406901 | IPI00406901 | yes | no  |       | 3 | 1.7703E-41  | 194.05 |
| EDIIA(deIRQNFSNITVSTEDQVK                | 2519.2867 | IPI00129677 | IPI00129677 | yes | no  |       | 3 | 1.6472E-25  | 168.79 |
| ED(deIIAIRQNFSNITVSTEDQVK                | 2519.2867 | IPI00129677 | IPI00129677 | yes | no  |       | 3 | 1.6472E-25  | 168.79 |
| ECIGN(deCSEPDDPTK                        | 1620.6396 | IPI0012835E | IPI0012835E | yes | no  |       | 2 | 0.0015331   | 109.48 |
| ECHTIQN(deYTIWR                          | 1619.7515 | IPI0012522C | IPI0012522C | yes | no  | 2,3   |   | 2.0293E-10E | 247.88 |
| EAYKN(deSIIYSQMOK                        | 1814.9237 | IPI0022170E | IPI0022170E | yes | no  | 2,3   |   | 3.1085E-11  | 162.48 |
| EATIVGEN(deETYPR                         | 1477.7049 | IPI0013114E | IPI0013114E | yes | no  |       | 2 | 5.1192E-16  | 175.15 |
| EASNHSSGAGIVQIN(deKSNDKETVVGR            | 2696.3478 | IPI00108844 | IPI00108844 | yes | no  |       | 3 | 3.5425E-07  | 94.463 |
| EASNHSSGAGIVQIN(deK                      | 1610.8012 | IPI00108844 | IPI00108844 | yes | no  | 2,3   |   | 3.9166E-25  | 182.15 |
| EASN(deHSSGAGIVQINKSNDKETVVGR            | 2696.3478 | IPI00108844 | IPI00108844 | yes | no  |       | 3 | 3.5425E-07  | 94.463 |
| EASN(deHSSGAGIVQINK                      | 1610.8012 | IPI00108844 | IPI00108844 | yes | no  | 2,3   |   | 3.9166E-25  | 182.15 |
| EASHYSIHDIVISYN(deTSDSTVFPGAVAK          | 3007.4563 | IPI00222967 | IPI00222967 | yes | no  |       | 3 | 1.0352E-10E | 222.48 |
| EAQYN(deSTFR                             | 1114.5043 | IPI0080798E | IPI0080798E | yes | no  |       | 2 | 1.8341E-06  | 140.49 |
| EAPFGTNCN(deITITSR                       | 1679.7937 | IPI0012925E | IPI0012925E | yes | no  |       | 2 | 0.0009597   | 101.42 |
| EANIT(deEDQIIFPK                         | 1663.8457 | IPI0012212E | IPI0012212E | yes | no  | 2,3   |   | 1.7264E-16  | 176.25 |
| EAINQAVN(deTTR                           | 1215.6208 | IPI0011691E | IPI0011691E | yes | no  |       | 2 | 0.000244    | 134.56 |
| EAGNASQI(deFDSWIK                        | 1677.8362 | IPI0013458E | IPI0013458E | yes | yes | 2,3   |   | 1.1878E-34  | 198.95 |
| EAHNSAPFNF(deSIPPGFGR                    | 2180.0552 | IPI0011548E | IPI0011548E | yes | no  |       | 3 | 0.0016508   | 79.837 |
| EAHNV(deSAPFNFSIPPGFGR                   | 2180.0552 | IPI0011548E | IPI0011548E | yes | no  |       | 3 | 0.0016508   | 79.837 |
| EAFN(deETNQAIQTISR                       | 1720.838  | IPI00112614 | IPI00112614 | yes | yes | 2,3   |   | 5.2857E-12E | 252.82 |
| EADN(deHTAFIR                            | 1172.5574 | IPI0011833E | IPI0011833E | yes | yes |       | 2 | 0.0027502   | 103.08 |
| EACIQHYVYN(deASYIVWK                     | 2143.0197 | IPI0012015E | IPI0012015E | yes | yes |       | 2 | 5.3429E-07  | 136.35 |
| DYYPIN(deESIASIPR                        | 1749.8938 | IPI00121627 | IPI00121627 | yes | yes | 2,3   |   | 3.1626E-57  | 211.57 |
| DYYIN(deKTENEK                           | 1415.6569 | IPI0039684C | IPI0039684C | yes | no  | 2,3   |   | 1.8784E-11  | 169.65 |
| DYRPSAGN(deNSIQDQTVVFK                   | 2173.044  | IPI0032246E | IPI0032246E | yes | no  | 2,3   |   | 5.7926E-42  | 199.15 |
| DWSQNMVFN(deCEDNPSR                      | 2148.8266 | IPI0015381C | IPI0015381C | yes | no  |       | 2 | 6.9531E-37  | 191.21 |
| DWIWNQMHIDEKKN(deESIPHYVGK               | 2867.3337 | IPI0013818C | IPI0013818C | yes | yes |       | 3 | 0.0002893   | 85.087 |
| DWCN(deWTIISR                            | 1349.6187 | IPI0012493E | IPI0012493E | yes | no  |       | 2 | 0.00078     | 118.48 |
| DVIWFRPTIINDTGN(deYTCMIR                 | 2584.2566 | IPI0092988E | IPI0092988E | yes | no  |       | 3 | 0.0001785   | 92.39  |
| DVIWFRPTIIN(deDTGNYTCMIR                 | 2584.2566 | IPI0092988E | IPI0092988E | yes | no  |       | 3 | 0.0001785   | 92.39  |
| DVGSSTTN(deNSQACAFIEQYFHNSDITEFMR        | 3566.5467 | IPI00130661 | IPI00130661 | yes | yes | 3,4   |   | 2.1336E-87  | 205.13 |
| DVFIPKPSWGN(deHTPIFR                     | 2010.0476 | IPI0011731E | IPI0011731E | yes | yes |       | 3 | 0.0039561   | 90.367 |
| DTYVN(de)ASQSIYGSSPR                     | 1743.8064 | IPI00122977 | IPI00122977 | yes | no  | 2,3   |   | 4.1261E-45  | 202.18 |
| DTTGSHTFGMGCEITNN(deR                    | 2271.9637 | IPI00137987 | IPI00137987 | yes | yes |       | 3 | 1.8104E-25  | 176.94 |
| DTISIN(deATNIK                           | 1188.635  | IPI0012119C | IPI0012119C | yes | no  |       | 2 | 3.1922E-07  | 155.48 |
| DTCAQECSHFNI(deTK                        | 1709.7138 | IPI00132474 | IPI00132474 | yes | no  | 2,3   |   | 1.3619E-56  | 218.21 |
| DTAVEGEEIEVN(deCTAMASKPATTIR             | 2692.2684 | IPI0085672E | IPI0085672E | yes | no  | 2,3   |   | 9.1555E-25  | 147.9  |
| DSYPDGN(deITWYRNGK                       | 1784.8118 | IPI0012137E | IPI0012137E | yes | no  | 2,3   |   | 2.6731E-11  | 164.15 |
| DSYPDGN(deITWYR                          | 1485.6525 | IPI0012137E | IPI0012137E | yes | no  |       | 2 | 0.0011379   | 124.12 |
| DSVIN(deISESVEDGPR                       | 1615.7689 | IPI00114044 | IPI00114044 | yes | yes |       | 3 | 4.2878E-05  | 139.86 |
| DSGIWINGFDYTGMSHVTPHIPEIN(deDTIR         | 3284.5561 | IPI0040722E | IPI0040722E | yes | yes | 3,4   |   | 1.3836E-13  | 102.21 |
| DSCESNQN(deITCR                          | 1482.5827 | IPI00466371 | IPI00466371 | no  | no  |       | 2 | 3.6295E-24  | 189.3  |
| DQGNV(deTDMASMK                          | 1295.5486 | IPI00471081 | IPI00471081 | yes | yes |       | 2 | 0.0007711   | 126.09 |
| DQCIVDDITYNVN(deDTFHKR                   | 2352.0805 | IPI0011353E | IPI0011353E | yes | no  | 2,3,4 |   | 0.0001412   | 97.904 |
| DQCIVDDITYNVN(deDTFHK                    | 2195.9793 | IPI0011353E | IPI0011353E | yes | no  | 2,3   |   | 4.2894E-21  | 177.04 |
| DNTTC(deYEFKK                            | 1304.5707 | IPI0011906E | IPI0011906E | yes | yes |       | 2 | 0.0042924   | 106.62 |
| DNTTC(deYEFK                             | 1176.4757 | IPI0011906E | IPI0011906E | yes | yes |       | 2 | 0.018641    | 85.958 |
| DNSCVDPPHVPN(deATIVTR                    | 1990.9531 | IPI0013001C | IPI0013001C | yes | no  | 2,3   |   | 2.4017E-07  | 135.18 |
| DNATQEEIIHYIE(deK                        | 1701.821  | IPI0032119C | IPI0032119C | yes | no  | 2,3   |   | 1.8016E-08  | 160.48 |
| DMSDEIGCVN(deVTQCDGPNKFK                 | 2413.0348 | IPI0031206E | IPI0031206E | yes | no  |       | 3 | 0.0005824   | 111.33 |
| DKNGTAEPPIN(deASAGDQEEK                  | 2226.0513 | IPI0012334E | IPI0012334E | yes | yes | 2,3   |   | 4.3154E-08  | 112.55 |
| DKN(deGTAEPPINASAGDQEEK                  | 2226.0513 | IPI0012334E | IPI0012334E | yes | yes | 2,3   |   | 4.3154E-08  | 112.55 |
| DKISPIHIA(deINFSIDPK                     | 1907.0516 | IPI0011597E | IPI0011597E | yes | yes |       | 3 | 0.0093404   | 76.391 |
| DIYEYSWVQGPWNSN(deRTER                   | 2399.0931 | IPI00118674 | IPI00118674 | yes | yes | 2,3   |   | 0.0001049   | 100.45 |
| DIYEYSWVQGPWNSN(deR                      | 2012.9017 | IPI00118674 | IPI00118674 | yes | yes |       | 2 | 0.0001662   | 121.72 |
| DIVV(deEISQWWMKPNNTIHPNIR                | 2894.4497 | IPI0031950E | IPI0031950E | yes | no  | 3,4   |   | 5.3856E-05  | 88.755 |
| DIVQNVFMSN(deMSMDIQSHPSSCPK              | 2751.2125 | IPI0012119C | IPI0012119C | yes | no  | 3,4   |   | 3.7008E-16  | 124.2  |
| DIVGN(deITEIESEDIQIEAIIIR                | 2500.2731 | IPI0012239E | IPI0012239E | yes | no  | 2,3   |   | 0           | 262.12 |
| DISVFAPN(deMTEIKDVTQYR                   | 2339.1831 | IPI0085510E | IPI0085510E | yes | no  | 2,3   |   | 6.6104E-05  | 99.747 |
| DISVFAPN(deMTEIK                         | 1576.8171 | IPI0085510E | IPI0085510E | yes | no  |       | 2 | 0.0021943   | 96.591 |
| DISHSIYFFNTS(deDIR                       | 1944.904  | IPI00114457 | IPI00114457 | yes | yes |       | 3 | 0.0007328   | 101.62 |
| DIQNFIE(deVTSSVDVK                       | 1806.9    | IPI0099093E | IPI0099093E | yes | no  | 2,3   |   | 1.8749E-06  | 148.36 |
| DIQDIHKDTEN(deR                          | 1482.7063 | IPI00129304 | IPI00129304 | yes | yes |       | 2 | 0.0067507   | 98.407 |
| DINSQIEIQNVN(deDTHITIGIKPDTTYDIK         | 3511.8046 | IPI00110264 | IPI00110264 | yes | yes | 3,4   |   | 1.0456E-22  | 112.26 |
| DINSQIEIQN(deVTNDTHITIGIKPDTTYDIK        | 3511.8046 | IPI00110264 | IPI00110264 | yes | yes | 3,4   |   | 1.0456E-22  | 112.26 |
| DIN(deSTAQNVMFYDMGSGSTVCTIVTYQTVK        | 3329.5254 | IPI0012334E | IPI0012334E | yes | no  | 3,4   |   | 5.5776E-06  | 78.128 |
| DIN(deHTAQGIIEKDSWK                      | 1853.9272 | IPI0012095E | IPI0012095E | yes | no  |       | 2 | 0.0013996   | 106.38 |
| DIIFSDDTECISNIQN(deK                     | 2010.9204 | IPI0047108C | IPI0047108C | yes | no  |       | 2 | 2.9877E-19E | 287.01 |
| DIGTASHN(deFSGAIPR                       | 1541.7587 | IPI0022982C | IPI0022982C | yes | yes | 2,3   |   | 7.5387E-05  | 138.19 |
| DIGPAIAN(deSSHDVK                        | 1422.7103 | IPI00108811 | IPI00108811 | yes | yes | 2,3   |   | 3.3207E-33  | 198.16 |
| DIGMFAPN(deMTR                           | 1251.574  | IPI0099093E | IPI0099093E | yes | no  |       | 2 | 0.0077619   | 75.695 |
| DIFTNQSDFADTTKDTTITIVIH(deK              | 2820.4182 | IPI0011610E | IPI0011610E | yes | yes | 3,4   |   | 1.4483E-38  | 172.3  |
| DIFTN(de)QSDFADTTK                       | 1601.7209 | IPI0011610E | IPI0011610E | yes | no  |       | 2 | 4.6231E-24  | 188.39 |
| DIEHHITNVNVSFYDDIVN(deGTVIK              | 2741.3661 | IPI0046760C | IPI0046760C | yes | yes |       | 3 | 2.9756E-46  | 181.54 |
| DIEHHITNVN(deVSFYDDIVNGTVIK              | 2741.3661 | IPI0046760C | IPI0046760C | yes | yes |       | 3 | 2.9756E-46  | 181.54 |
| DIDTDFTSN(deASQPETK                      | 1767.7799 | IPI0013057E | IPI0013057E | yes | yes |       | 2 | 3.0912E-45  | 204.13 |

|                                            |           |             |             |     |     |       |   |            |        |
|--------------------------------------------|-----------|-------------|-------------|-----|-----|-------|---|------------|--------|
| DIDMFIN(deASK                              | 1152.5485 | IPI00224752 | IPI00224752 | yes | yes |       | 2 | 1.2012E-05 | 132.32 |
| DIAVGDDYTN(deR                             | 1237.5575 | IPI00468674 | IPI00468674 | yes | no  |       | 2 | 0.0011462  | 107.03 |
| DIAVFCHFTNAAN(deSSVR                       | 1907.8948 | IPI00876541 | IPI00876541 | yes | no  | 2,3   |   | 1.7966E-07 | 139.6  |
| DHVNVSMEIATDFPFN(deTTEWEGYIPK              | 3039.396  | IPI00136942 | IPI00136942 | yes | yes |       | 3 | 3.9012E-29 | 155.25 |
| DHVN(deVSMIEATDFPFNTTEWEGYIPK              | 3039.396  | IPI00136942 | IPI00136942 | yes | yes |       | 3 | 3.9012E-29 | 155.25 |
| DGYAVANTN(deTSDVVK                         | 1639.7478 | IPI00129253 | IPI00129253 | yes | no  |       | 2 | 0.0002729  | 128.96 |
| DGTSQPAICPQN(deVTMNMIEGIK                  | 2290.0392 | IPI00320204 | IPI00320204 | yes | yes | 2,3   |   | 4.863E-18  | 142.43 |
| DGSDSAAMVYN(deSSQEWGIR                     | 2071.8905 | IPI00119522 | IPI00119522 | yes | yes | 2,3   |   | 6.355E-230 | 296.73 |
| DGSCIGN(deSSR                              | 1051.4353 | IPI00119063 | IPI00119063 | yes | yes |       | 2 | 0.0024682  | 104.82 |
| DGQQN(deISIIYTEPGASQTQTGASFR               | 2668.2729 | IPI0028481E | IPI0028481E | yes | no  |       | 3 | 3.5514E-14 | 116.35 |
| DGIAIN(deITIR                              | 1084.6241 | IPI0011906E | IPI0011906E | yes | yes |       | 2 | 9.6144E-06 | 134.3  |
| DGASEEETN(deISK                            | 1278.5576 | IPI0038728E | IPI0038728E | yes | yes |       | 2 | 0.0015123  | 110.92 |
| DFIPSTISFTWNYQN(deNTEVIQIR                 | 2842.3926 | IPI0046805E | IPI0046805E | yes | no  |       | 3 | 2.1318E-09 | 117.37 |
| DEIGNVSTSHIIIDDSV(deEMEIRPR                | 2837.4229 | IPI0030903E | IPI0030903E | yes | yes |       | 3 | 3.4398E-07 | 95.5   |
| DDYRPTWTIN(deQTEPVAGNYYPVNT                | 2969.3944 | IPI0038130E | IPI0038130E | yes | yes | 2,3,4 |   | 3.7946E-33 | 167.34 |
| DDIHPTIPAGQYFINI(deTYNYPVHSFDGRK           | 3377.6469 | IPI0038731E | IPI0038731E | yes | no  |       | 4 | 0.041943   | 58.904 |
| DDIHPTIPAGQYFINI(deTYNYPVHSFDGR            | 3249.552  | IPI0038731E | IPI0038731E | yes | no  | 3,4   |   | 5.412E-66  | 198.49 |
| DDAMVYN(de)VTSR                            | 1269.566  | IPI00406901 | IPI00406901 | yes | no  |       | 2 | 0.023236   | 67.519 |
| DCVSCQN(deVSR                              | 1223.5023 | IPI0012119C | IPI0012119C | yes | no  |       | 2 | 0.0038027  | 99.752 |
| DCDFIEDGEERN(deCTGK                        | 1943.7626 | IPI0012728C | IPI0012728C | yes | yes |       | 3 | 0.011863   | 75.462 |
| DAVRN(deITEVVPQIIDQIR                      | 2078.1484 | IPI0022344E | IPI0022344E | yes | yes |       | 3 | 0.0001376  | 112.67 |
| DATIQAYISSGN(deFSK                         | 1600.7733 | IPI0046921E | IPI0046921E | yes | yes | 2,3   |   | 7.9179E-12 | 165.02 |
| DAMVGN(deYTCEVTEISR                        | 1843.808  | IPI0012483C | IPI0012483C | yes | no  | 2,3   |   | 9.9354E-35 | 197.15 |
| DAHFN(deSTITEFGETINNFVER                   | 2440.1295 | IPI00346062 | IPI00346062 | yes | yes |       | 3 | 0.001381   | 77.899 |
| DAGVGFPEYQEEDN(deSTYNFR                    | 2336.9822 | IPI00308971 | IPI00308971 | yes | yes | 2,3   |   | 3.4625E-13 | 147.17 |
| DAGN(deYTVIITNPISMEK                       | 1864.9241 | IPI0012432E | IPI0012432E | yes | no  | 2,3   |   | 1.7618E-10 | 151.95 |
| DAAQCSGGSVAHIAEIGIPTN(deITHIIIFR           | 3060.5815 | IPI00331407 | IPI00331407 | yes | no  |       | 3 | 8.7511E-05 | 72.676 |
| CYVIPIN(deTSIVMPPK                         | 1730.9099 | IPI0013075E | IPI0013075E | yes | yes |       | 3 | 0.0027948  | 82.069 |
| CVVHYEN(de)STVPEKK                         | 1688.8192 | IPI0040914E | IPI0040914E | yes | yes | 2,3,4 |   | 2.8226E-86 | 235.73 |
| CVVHYEN(de)STVPEK                          | 1560.7242 | IPI0040914E | IPI0040914E | yes | yes | 2,3   |   | 0.0015101  | 136.3  |
| CVAN(deYTGNGR                              | 1110.4876 | IPI0011179E | IPI0011179E | yes | yes |       | 2 | 0.0019402  | 108.7  |
| CTPPPYVENAVMISEN(deR                       | 1975.9132 | IPI00138061 | IPI00138061 | yes | no  |       | 3 | 1.5399E-60 | 212.39 |
| CSWIITN(deITYFPETVPR                       | 2096.0401 | IPI0075806E | IPI0075806E | yes | no  | 2,3   |   | 0.0022933  | 82.529 |
| CSIIHSN(de)SVK                             | 1256.6547 | IPI0013322E | IPI0013322E | yes | no  | 2,3   |   | 0.0003033  | 127.87 |
| CRN(deYSIIIDQPK                            | 1505.766  | IPI00463774 | IPI00463774 | yes | no  |       | 3 | 0.0085043  | 88.187 |
| CQSPYQMN(deGSDTVTCVNSR                     | 2202.9092 | IPI0013001C | IPI0013001C | no  | no  | 2,3   |   | 1.1849E-79 | 223.29 |
| CQSPYQMN(deGSDTVTCINGR                     | 2186.9143 | IPI0078844E | IPI0078844E | yes | no  | 2,3   |   | 3.718E-10  | 137.44 |
| CQAYKN(deNSESFIHIYMYEVAR                   | 2622.1995 | IPI00130654 | IPI00130654 | yes | no  |       | 3 | 1.8639E-17 | 142.94 |
| CQAIDFFPQN(deITMR                          | 1739.8123 | IPI0033144C | IPI0033144C | yes | no  |       | 3 | 0.0008508  | 134.68 |
| CPMAGISHTTWHSN(deR                         | 1753.7777 | IPI00130764 | IPI00130764 | yes | no  |       | 2 | 0.002142   | 87.519 |
| CPIITPFNDTNVVHTVNTAIAAFNTQNN(deGTYFK       | 3681.7886 | IPI0012824E | IPI0012824E | yes | yes | 3,4   |   | 2.5843E-40 | 141.48 |
| CPIITPFN(deDTNVVHTVNTAIAAFNTQNNGTYFK       | 3681.7886 | IPI0012824E | IPI0012824E | yes | yes | 3,4   |   | 2.5843E-40 | 141.48 |
| CNSVITYN(deITPVVQK                         | 1734.8975 | IPI00222967 | IPI00222967 | yes | no  | 2,3   |   | 1.3425E-24 | 181.51 |
| CN(deTTQGNVTSIIR                           | 1591.7624 | IPI0013474E | IPI0013474E | yes | no  |       | 2 | 0.0006866  | 136.39 |
| CN(deFTIIESR                               | 1138.5441 | IPI0022993E | IPI0022993E | yes | no  |       | 2 | 0.015334   | 90.913 |
| CN(deASSQFICSSGR                           | 1472.6136 | IPI0011906E | IPI0011906E | yes | yes |       | 2 | 0.0026477  | 126.48 |
| CIVPHTVN(deISSAWR                          | 1638.83   | IPI00129041 | IPI00129041 | yes | no  | 2,3   |   | 0.0012958  | 129.77 |
| CIVPDTVN(deISSWR                           | 1632.793  | IPI0013129E | IPI0013129E | yes | yes |       | 2 | 0.0022608  | 96.591 |
| CISPNVTSCACTIN(deFTIK                      | 2084.9693 | IPI0038731E | IPI0038731E | yes | yes | 2,3   |   | 1.4769E-75 | 224.86 |
| CISPN(deVTSCACTINFTIK                      | 2084.9693 | IPI0038731E | IPI0038731E | yes | yes | 2,3   |   | 1.4769E-75 | 224.86 |
| CISKN(deYTTDIITKIPGYPVK                    | 2310.2294 | IPI0012464C | IPI0012464C | yes | yes |       | 3 | 0.003175   | 88.19  |
| CISKN(deYTTDIITK                           | 1555.7916 | IPI0012464C | IPI0012464C | yes | yes |       | 3 | 0.009486   | 95.428 |
| CIQMSSFAN(deR                              | 1212.538  | IPI0032006E | IPI0032006E | yes | no  |       | 2 | 3.3746E-08 | 150.04 |
| CIPHFAMIGNDTVMCTEQGN(deWTRIPECIEVK         | 3705.687  | IPI0032246E | IPI0032246E | yes | no  |       | 4 | 3.4946E-23 | 116.35 |
| CIPHFAMIGNDTVMCTEQGN(deWTR                 | 2737.1869 | IPI0032246E | IPI0032246E | yes | no  |       | 3 | 9.2848E-16 | 136.68 |
| CIPHFAMIGN(deDTVMCTEQGNWTRIPECIEVK         | 3705.687  | IPI0032246E | IPI0032246E | yes | no  |       | 4 | 3.4946E-23 | 116.35 |
| CIPHFAMIGN(deDTVMCTEQGNWTR                 | 2737.1869 | IPI0032246E | IPI0032246E | yes | no  |       | 3 | 9.2848E-16 | 136.68 |
| CHEGN(deGTFCGACR                           | 1653.6082 | IPI00132474 | IPI00132474 | yes | yes | 2,3   |   | 0.0009478  | 134.04 |
| CGWSPAEIN(deYTVPGIGSAGEASFISQCMK           | 3245.4468 | IPI0033103E | IPI0033103E | yes | yes |       | 3 | 5.9813E-30 | 125.54 |
| CGNCN(deITSIEDDFCK                         | 1960.7601 | IPI0013759E | IPI0013759E | yes | yes | 2,3   |   | 2.4647E-35 | 199.37 |
| CFNAMEVDAIN(deSSHVPSTPVENPAQIR             | 2982.3964 | IPI0031859E | IPI0031859E | yes | no  | 3,4   |   | 2.9971E-48 | 171.5  |
| CFMAN(deGTWGYPFHGDYIK                      | 2277.9612 | IPI0012901C | IPI0012901C | yes | no  | 2,3   |   | 4.006E-19  | 164.53 |
| CF(deANKVNISFPSAQSPASDTHIK                 | 2631.3115 | IPI0062466E | IPI0062466E | yes | yes | 2,3,4 |   | 2.3268E-39 | 179.58 |
| CEVICNQ(deSNKPITITVEQSR                    | 2375.1573 | IPI00626537 | IPI00626537 | yes | yes |       | 3 | 4.7283E-08 | 125.73 |
| CEQEASEDIKPAITGN(deK                       | 1888.8837 | IPI0013480E | IPI0013480E | yes | no  | 2,3   |   | 1.3031E-14 | 168.08 |
| CDNN(deDTIIVR                              | 1218.5663 | IPI0046760C | IPI0046760C | yes | yes |       | 2 | 1.5648E-07 | 147.26 |
| CDISN(deSTEAGQK                            | 1308.5616 | IPI0015320E | IPI0015320E | yes | no  |       | 2 | 0.0036869  | 83.204 |
| CDGDFDCEDRTDEAN(deCSVK                     | 2291.8365 | IPI0051536C | IPI0051536C | yes | no  |       | 3 | 7.7456E-10 | 133.71 |
| CCGWVSHYN(deWTENEEIMGFTK                   | 2647.093  | IPI0010809E | IPI0010809E | yes | no  |       | 3 | 3.5657E-11 | 125.73 |
| CAWSPEEEWN(deITTEIHPAER                    | 2650.2122 | IPI0012397E | IPI0012397E | yes | yes |       | 3 | 1.9106E-11 | 126.4  |
| CAMDIGVNYIGTVN(deVTHTGIQCQIWR              | 3005.431  | IPI0011420E | IPI0011420E | yes | yes |       | 3 | 1.0716E-16 | 126.02 |
| CAISHAITIEFHQDGNPENVGIYN(deISR             | 3111.4832 | IPI0022242E | IPI0022242E | yes | yes | 3,4   |   | 3.6663E-34 | 134.47 |
| AYVPN(deATWYDYETGEEIGWR                    | 2419.0757 | IPI0084869E | IPI0084869E | yes | yes | 2,3   |   | 4.486E-13  | 146.1  |
| AYVFERN(deQSVGDPNVDIIR                     | 2191.1022 | IPI00127447 | IPI00127447 | yes | yes | 2,3   |   | 7.7119E-32 | 182.35 |
| AYVAFPDFFRN(deSTATWWKK                     | 2334.1586 | IPI0084869E | IPI0084869E | yes | yes |       | 3 | 0.0041783  | 88.73  |
| AYTIFVPTNHSIETQGN(deNSVIGIDTVR             | 2945.4883 | IPI0098726E | IPI0098726E | yes | no  | 3,4   |   | 3.0427E-65 | 194.68 |
| AYTIFVPTN(deHSIETQGNNSVIGIDTVR             | 2945.4883 | IPI0098726E | IPI0098726E | yes | no  | 3,4   |   | 3.0427E-65 | 194.68 |
| AWNVPVSN(deSSQPVR                          | 1568.7696 | IPI0012964E | IPI0012964E | yes | no  |       | 2 | 8.0611E-56 | 210.38 |
| AWN(deYTVDTPHGMFVSGTPFEQSVWITDVGSGPYGHTVKK | 4295.0422 | IPI00228567 | IPI00228567 | yes | yes |       | 5 | 0.0001191  | 55.314 |
| AWN(deYTVDTPHGMFVSGTPFEQSVWITDVGSGPYGHTVK  | 4166.9473 | IPI00228567 | IPI00228567 | yes | yes |       | 4 | 5.9206E-40 | 127.2  |
| AWGTPCEICPSVN(deTSEYK                      | 2097.9136 | IPI0082822E | IPI0082822E | yes | no  |       | 2 | 1.3107E-05 | 119.4  |
| AWGISVINPN(deKTK                           | 1426.7932 | IPI0098909E | IPI0098909E | yes | no  | 2,3   |   | 8.7953E-10 | 162.48 |
| AVYEAIRN(deCSIEDDSVR                       | 1995.932  | IPI00856861 | IPI00856861 | yes | no  |       | 2 | 2.1775E-05 | 123.08 |
| AVVGSYTTTN(deVSIAPR                        | 1747.9468 | IPI00330481 | IPI00330481 | yes | yes | 2,3   |   | 4.3176E-21 | 179.14 |
| AVTSISHDGSVICTFTAN(deSTYTK                 | 2459.1639 | IPI0045348E | IPI0045348E | yes | yes |       | 3 | 1.1552E-09 | 113.51 |
| AVN(deQTGAIQCDYSTSR                        | 1932.8636 | IPI00120674 | IPI00120674 | yes | no  | 2,3   |   | 4.1625E-37 | 194.92 |



|                                        |           |             |             |     |     |       |   |            |        |
|----------------------------------------|-----------|-------------|-------------|-----|-----|-------|---|------------|--------|
| AVKIN(deETIGNQDKTAER                   | 1885.9858 | IPI0030999E | IPI0030999E | yes | yes |       | 3 | 9.307E-20  | 176.4  |
| AVIVNN(deITTGEK                        | 1257.6929 | IPI0012890E | IPI0012890E | yes | yes |       | 2 | 0.0010964  | 120.84 |
| AVISMIN(deETMNEAPEETK                  | 2005.9336 | IPI0087541E | IPI0087541E | yes | no  | 2,3   |   | 1.5451E-17 | 278.4  |
| AVIGDHGDE(deIFSVFGSPFIKDGASEEETNISK    | 3394.6205 | IPI0038728E | IPI0038728E | yes | yes |       | 4 | 9.5388E-07 | 83.934 |
| AVGAVDWSDHPYGYN(deITIQAK               | 2304.1175 | IPI00623114 | IPI00623114 | yes | no  |       | 3 | 2.5641E-09 | 117.67 |
| AVAYGEKN(deITFQGPIPK                   | 1831.9832 | IPI00111794 | IPI00111794 | yes | no  | 2,3,4 |   | 1.9382E-10 | 248.54 |
| ATYIVIN(deNSKPEITSK                    | 1776.9622 | IPI0028390C | IPI0028390C | yes | yes |       | 3 | 0.013005   | 73.91  |
| ATVN(deDSGEYR                          | 1110.4942 | IPI0012948E | IPI0012948E | yes | no  |       | 2 | 1.5741E-18 | 174.42 |
| ATSQFQN(deGSITAFIPGISQCTVYSAK          | 2888.4378 | IPI0034014C | IPI0034014C | yes | yes |       | 3 | 1.4966E-13 | 103.53 |
| ATPNEGFFNQN(deITTFYDRIGIYPR            | 2996.4457 | IPI0031553E | IPI0031553E | yes | yes |       | 3 | 0.018024   | 58.366 |
| ATPNEGFFNQN(deITTFYDR                  | 2297.0389 | IPI0031553E | IPI0031553E | yes | yes | 2,3   |   | 1.577E-12  | 143.04 |
| ATHN(deDSGSYFCR                        | 1413.5732 | IPI0016287C | IPI0016287C | yes | yes |       | 2 | 0.0047838  | 80.469 |
| ATGTAHFFNFIIN(deTTDYR                  | 2088.0065 | IPI00132927 | IPI00132927 | yes | no  |       | 3 | 1.3107E-05 | 119.4  |
| ATDADINDIIVYTIQEVTPN(deASK             | 2490.249  | IPI0031413E | IPI0031413E | yes | no  |       | 3 | 0.0059633  | 61.222 |
| ASVVN(deVTQHCTMESWESMNEVAR             | 2664.1731 | IPI0012124C | IPI0012124C | yes | yes | 2,3,4 |   | 9.4202E-19 | 143.04 |
| ASSIMVN(deITEIFPKPK                    | 1773.9699 | IPI0040690I | IPI0040690I | yes | no  |       | 3 | 5.6526E-88 | 235.22 |
| ASQQISN(deETSSFGFNIRK                  | 2126.0756 | IPI0015325E | IPI0015325E | yes | no  |       | 3 | 0.014853   | 66.826 |
| ASQQISN(deETSSFGFNIR                   | 1997.9807 | IPI0015325E | IPI0015325E | yes | no  | 2,3   |   | 1.8463E-17 | 274.43 |
| ASPGN(deGSGHSSAPSPDPTITR               | 1991.9297 | IPI0031051E | IPI0031051E | yes | yes |       | 3 | 0.010059   | 61.096 |
| ASIPAPTIQSIN(deISWNR                   | 1866.9952 | IPI00228404 | IPI00228404 | yes | yes |       | 3 | 2.7812E-20 | 172.57 |
| ASGN(deFSQVDWFIIHKER                   | 2033.0119 | IPI0046912E | IPI0046912E | yes | no  |       | 3 | 0.011152   | 72.898 |
| ASGN(deFSQVDWFIIHK                     | 1747.8682 | IPI0046912E | IPI0046912E | yes | no  | 2,3   |   | 7.1266E-18 | 178.14 |
| ARN(deISGVVIADHSGSFHNR                 | 2036.03   | IPI00118674 | IPI00118674 | yes | yes | 2,3   |   | 0.0078109  | 75.682 |
| AQVAN(deISSIIGEISR                     | 1556.8522 | IPI0015341E | IPI0015341E | yes | yes |       | 3 | 0.0024613  | 85.457 |
| AQPAN(deQSVIISIYDEK                    | 1774.9101 | IPI0062635C | IPI0062635C | yes | yes | 2,3   |   | 0.0015623  | 92.773 |
| AQN(deSISEIVVFWQDQKQK                  | 2132.0902 | IPI0011394E | IPI0011394E | yes | no  |       | 3 | 0.0005035  | 93.768 |
| AQITVTVTQTEHN(deITVSQIPAPQTWR          | 2918.525  | IPI0033102E | IPI0033102E | yes | yes |       | 3 | 0.0027451  | 60.991 |
| AQAECRN(deTTHIQR                       | 1696.8427 | IPI0032122E | IPI0032122E | yes | yes |       | 2 | 0.0055961  | 104.24 |
| AQAAIDKAN(deASR                        | 1214.6367 | IPI0011906E | IPI0011906E | yes | yes |       | 2 | 0.0071439  | 94.023 |
| APSN(deVSTVIHIIYIPEEAK                 | 2080.1205 | IPI00121421 | IPI00121421 | yes | no  | 2,3   |   | 0.0001018  | 95.622 |
| APSHNTTEP(deDPHSISPEIQAIIEVAQHVDVQNGR  | 3673.7721 | IPI00165807 | IPI00165807 | yes | no  | 4,5   |   | 0.0039759  | 48.607 |
| APSHN(de)TTEPDPHSISPEIQAIIEVAQHVDVQNGR | 3673.7721 | IPI00165807 | IPI00165807 | yes | no  | 4,5   |   | 0.0039759  | 48.607 |
| APQHVVNHIPPYTN(deVSIK                  | 2013.0796 | IPI0012304C | IPI0012304C | yes | no  | 2,3   |   | 0.0012165  | 87.676 |
| APIPTAIDTN(deSSKTPSIFPCASGAFSSFR       | 3026.4808 | IPI0011980E | IPI0011980E | yes | no  | 3,4   |   | 7.8394E-10 | 93.21  |
| APIPTAIDTN(deSSK                       | 1313.6827 | IPI0011980E | IPI0011980E | yes | no  |       | 2 | 0.039868   | 58.32  |
| ANYNIPIMVTDGKPPMTN(deITDIR             | 2660.3302 | IPI0012374E | IPI0012374E | yes | yes |       | 3 | 0.0002977  | 78.456 |
| ANVVA(deSAIAQIPQK                      | 1408.8038 | IPI0015314E | IPI0015314E | yes | yes | 2,3   |   | 1.1145E-06 | 151.9  |
| ANQVIPHN(deTTFQTEPTK                   | 2038.0484 | IPI00466371 | IPI01026704 | no  | no  | 2,3   |   | 8.1981E-76 | 227    |
| ANIQFGENGT(deTISAVTNK                  | 1863.9327 | IPI00127447 | IPI00127447 | yes | yes | 2,3   |   | 3.1549E-48 | 200.45 |
| ANIINFPEN(deNTFVINIEQITQDDTGSYK        | 3197.5517 | IPI0031005E | IPI0031005E | yes | no  | 2,3,4 |   | 1.1112E-22 | 127.3  |
| ANEQVIQNIN(deHTYK                      | 1670.8376 | IPI00876541 | IPI00876541 | yes | no  | 2,3   |   | 7.3341E-07 | 154.88 |
| ANA(deSTFAVPSVNSADTR                   | 1890.9072 | IPI0011906E | IPI0011906E | yes | yes | 2,3   |   | 0.0004441  | 89.859 |
| AN(deYTIKGNENGNFK                      | 1681.8424 | IPI0013820E | IPI0013820E | yes | no  |       | 3 | 0.0055489  | 89.959 |
| AN(deYTIK                              | 821.4647  | IPI0013820E | IPI0013820E | yes | no  |       | 2 | 0.006133   | 114.5  |
| AN(deVTFTISK                           | 979.53385 | IPI00122584 | IPI00122584 | yes | yes |       | 2 | 0.0052631  | 110.39 |
| AN(deTTQPGIVEGGQVIK                    | 1610.8628 | IPI0012024E | IPI0012024E | yes | no  | 2,3   |   | 3.0642E-08 | 153.72 |
| AN(deISSQVIK                           | 958.54475 | IPI00322867 | IPI00322867 | yes | no  |       | 2 | 0.0058637  | 108.43 |
| AN(deHSHSGDYICK                        | 1437.5732 | IPI0012948E | IPI0012948E | yes | no  | 2,3   |   | 2.3941E-59 | 164.9  |
| AN(deHSGAVVIK                          | 1107.64   | IPI0042083E | IPI0042083E | yes | no  |       | 2 | 0.0003032  | 122.33 |
| AN(deGTTVHVGIHPSK                      | 1416.7474 | IPI0013246C | IPI0013246C | yes | no  |       | 3 | 0.0040037  | 80.312 |
| AN(deDSDQGANAIDYTFHQAPEVVR             | 2646.1946 | IPI00719927 | IPI00719927 | yes | no  |       | 3 | 1.2337E-19 | 134.86 |
| AN(deATIEVK                            | 844.46543 | IPI00757771 | IPI00757771 | yes | no  | 1,2   |   | 0.01167    | 110.87 |
| AMSSN(deETAAYK                         | 1171.5179 | IPI0031646E | IPI0031646E | yes | yes |       | 2 | 1.0856E-32 | 191.79 |
| AMSN(deISVR                            | 876.44874 | IPI0040574E | IPI0040574E | yes | no  |       | 2 | 2.0779E-28 | 179.37 |
| AMN(deISASSMTITWK                      | 1539.7425 | IPI0046942E | IPI0046942E | yes | no  | 2,3   |   | 1.8871E-05 | 149.3  |
| AMIINQHVPMESSHIIQFVN(deWSSIIPERYK      | 3694.9116 | IPI0038728E | IPI0038728E | yes | yes | 3,4,5 |   | 8.89E-07   | 82.302 |
| AMIINQHVPMESSHIIQFVN(deWSSIIPERYK      | 3566.8167 | IPI0038728E | IPI0038728E | yes | yes | 3,4,5 |   | 9.1411E-23 | 112.74 |
| AMIINQHVPMESSHIIQFVN(deWSSIIPER        | 3275.6584 | IPI0038728E | IPI0038728E | yes | yes | 3,4,5 |   | 6.5593E-38 | 153.24 |
| AMGVNVIAANTHN(deTSMHMTGSGIYSPEAVR      | 3115.4638 | IPI0023041E | IPI0023041E | yes | yes | 3,4   |   | 4.6587E-30 | 122.51 |
| AMFN(deITIIYPNNIIAISNMIPK              | 2490.3379 | IPI0031950E | IPI0031950E | yes | yes | 2,3,4 |   | 3.8552E-63 | 190.96 |
| AIWIIN(deGSK                           | 1000.5706 | IPI0012466E | IPI0012466E | yes | yes |       | 2 | 0.0022746  | 120.12 |
| AIVASENN(deMSR                         | 1190.5714 | IPI00120674 | IPI00120674 | yes | no  |       | 2 | 0.0047427  | 100.93 |
| AISPN(deSTISSAPK                       | 1271.6721 | IPI00460291 | IPI00460291 | yes | no  |       | 2 | 0.0032545  | 87.083 |
| AISCIES(deSWKTIEQERNASVYTK             | 2846.3909 | IPI0012322E | IPI0012322E | yes | yes |       | 3 | 7.4421E-05 | 84.249 |
| AINASAN(deITSDGVEVIGR                  | 1785.9221 | IPI0033063E | IPI0033063E | yes | no  | 2,3   |   | 7.6387E-49 | 207.76 |
| AIN(deVTISSMGRNGIK                     | 1559.8454 | IPI00131091 | IPI00131091 | yes | no  |       | 2 | 0.0034407  | 118.08 |
| AIN(deVTISSMGR                         | 1147.6019 | IPI00131091 | IPI00131091 | yes | no  |       | 2 | 0.0003158  | 127.17 |
| AIN(deGSAIYTGSSIDFVR                   | 1769.8948 | IPI00877197 | IPI00877197 | yes | no  | 2,3   |   | 9.9232E-38 | 198.85 |
| AIN(deDSIHYINR                         | 1314.668  | IPI0080834E | IPI0080834E | yes | no  | 2,3   |   | 6.3784E-11 | 162.68 |
| AIN(deASQEETGAVFICPWK                  | 2019.9724 | IPI0031515E | IPI0031515E | yes | yes |       | 3 | 0.0018141  | 83.966 |
| AIN(deASANITSDGVEVIGR                  | 1785.9221 | IPI0033063E | IPI0033063E | yes | no  | 2,3   |   | 7.6387E-49 | 207.76 |
| AIMVISEEPIIYMPPPCQPIIN(deTTESIR        | 3308.6859 | IPI0027860E | IPI0027860E | yes | yes |       | 4 | 5.4459E-07 | 84.68  |
| AIMPFDSDIHDPCITN(deR                   | 2113.9925 | IPI0011348C | IPI0011348C | yes | no  |       | 3 | 1.0288E-07 | 138.57 |
| AIMKEVMNIIQPIN(deVTK                   | 1941.0791 | IPI0012605C | IPI0012605C | yes | no  |       | 3 | 0.0001506  | 115.8  |
| AIMDICDQIEKN(deQTK                     | 1805.8652 | IPI0065863E | IPI0065863E | yes | yes | 2,3   |   | 0.0013096  | 109.35 |
| AIKGETVN(deTSIPFSFEGIIFPK              | 2394.2835 | IPI00119324 | IPI00119324 | yes | no  |       | 3 | 0.0002964  | 89.374 |
| AIITN(deVSSVAIGSR                      | 1386.7831 | IPI00930841 | IPI00930841 | yes | yes |       | 2 | 0.0022513  | 95.067 |
| AIIQGIPEQN(deYTVQIIAYYKDK              | 2680.4476 | IPI0033063E | IPI0033063E | yes | no  |       | 3 | 0.0016008  | 76.155 |
| AIIQGIPEQN(deYTVQIIAYYK                | 2437.3257 | IPI0033063E | IPI0033063E | yes | no  |       | 3 | 5.1197E-25 | 161.35 |
| AIIPDFNIHEDPCIITN(deR                  | 2137.0626 | IPI00113854 | IPI00113854 | yes | no  |       | 3 | 0.00043    | 95.662 |
| AIGYEN(deATQAIGR                       | 1362.6892 | IPI0011980E | IPI0011980E | yes | no  |       | 2 | 1.2531E-23 | 188.13 |
| AIGITEMFEPSKAN(deFTK                   | 1882.9499 | IPI0011506E | IPI0011506E | yes | yes | 2,3   |   | 8.0018E-05 | 119.68 |
| AIEVAN(deGTVTSIPGATVTHICPGK            | 2368.2672 | IPI0012618E | IPI0012618E | yes | yes |       | 3 | 1.4584E-10 | 106.39 |
| AIDIDPSKTN(deVSGGAIAIGHPIGGSGSR        | 2646.3725 | IPI0022643C | IPI0022643C | yes | yes | 3,4   |   | 4.6147E-48 | 178.11 |
| AIAGIVYN(deSSGTEPCYDIYR                | 2248.047  | IPI0033155C | IPI0033155C | yes | yes | 2,3   |   | 3.0859E-15 | 264.23 |
| AIADVIQDIADDN(deSSR                    | 1701.817  | IPI0013580E | IPI0013580E | yes | no  |       | 3 | 9.2544E-05 | 129.01 |

|                                           |           |             |             |     |     |       |              |        |
|-------------------------------------------|-----------|-------------|-------------|-----|-----|-------|--------------|--------|
| AIAAAGYDVEKN(deNSR                        | 1577.7798 | IPI00331597 | IPI00331597 | yes | no  | 2,3   | 5.0267E-17   | 178.67 |
| AHINN(deISFPIR                            | 1280.699  | IPI00876541 | IPI00876541 | yes | yes |       | 2 0.0006661  | 113.63 |
| AHFSSIN(deITIR                            | 1257.683  | IPI00466371 | IPI01026704 | no  | no  |       | 2 0.0050696  | 87.001 |
| AGYFN(deFTSATITYIAQEDGPVVIGSTSAPGQGGIIAQR | 3856.9272 | IPI0046718C | IPI0046718C | yes | yes | 4,5   | 1.0163E-50   | 138.88 |
| AGVVVFN(deCSIR                            | 1220.6336 | IPI0031477E | IPI0031477E | yes | yes |       | 2 0.0003387  | 130.1  |
| AGPN(deGTIFVVDAYK                         | 1450.7456 | IPI0022199E | IPI0022199E | yes | yes | 2,3   | 1.6659E-10   | 160.81 |
| AGMASPIYN(deVTWSAGWK                      | 1837.8821 | IPI00666034 | IPI00666034 | yes | no  | 2,3   | 1.9804E-08   | 145.69 |
| AGGSATIN(deCTVTSIIPVGPMPR                 | 2101.066  | IPI00849192 | IPI00849192 | yes | no  |       | 3 3.0675E-15 | 139.04 |
| AGEQINNHVKN(deK                           | 1350.7004 | IPI0011610E | IPI0011610E | yes | no  | 2,3   | 0.0037544    | 116.03 |
| AFYN(deGTWYRR                             | 1332.6364 | IPI0085831E | IPI0085831E | yes | no  |       | 2 0.014748   | 91.867 |
| AFYN(deGTWYR                              | 1176.5352 | IPI0085831E | IPI0085831E | yes | no  |       | 2 0.016446   | 89.247 |
| AFVEN(deITVIENSIVFK                       | 1821.9877 | IPI00120832 | IPI00120832 | yes | no  | 2,3   | 0            | 315.66 |
| AFSTIIVN(deVSGK                           | 1234.6921 | IPI00222921 | IPI00222921 | yes | no  |       | 2 0.0024619  | 97.86  |
| AFSGSPN(deITK                             | 1020.524  | IPI00119522 | IPI00119522 | yes | yes |       | 2 0.0029332  | 101.95 |
| AFQIN(deTFNIKVQPFNVTK                     | 2108.1419 | IPI00222967 | IPI00222967 | yes | no  |       | 3 0.0012671  | 94.922 |
| AFPEVCN(deETMMAIWEECKPCIK                 | 2742.1984 | IPI0032042C | IPI0032042C | yes | no  | 3,4   | 4.8525E-09   | 114.96 |
| AFNISPN(deDTSSGSCGINIVTIKVENK             | 2764.3702 | IPI0046921E | IPI0046921E | yes | yes | 3,4   | 5.1757E-16   | 122.53 |
| AFNISPN(deDTSSGSCGINIVTIK                 | 2294.1213 | IPI0046921E | IPI0046921E | yes | yes | 2,3   | 9.8632E-77   | 184.35 |
| AFN(deITWISTDFK                           | 1441.7242 | IPI0011806E | IPI0011806E | yes | no  |       | 2 0.002211   | 102.97 |
| AFN(deECCTIANK                            | 1326.5697 | IPI0033083E | IPI0033083E | yes | yes |       | 2 1.4674E-70 | 228.12 |
| AFMN(deSSFTIDPK                           | 1356.6384 | IPI00121362 | IPI00121362 | yes | no  | 2,3   | 1.7243E-10   | 162.49 |
| AFITNF(deSMIIDGVTPGVVK                    | 2171.1337 | IPI00312711 | IPI00312711 | yes | no  | 2,3   | 5.8608E-09   | 129.2  |
| AFIN(deGTGVETVVSADIPNAHGIAVDWVSR          | 2994.5199 | IPI0011906E | IPI0011906E | yes | yes | 2,3,4 | 3.8196E-86   | 181.35 |
| AFFDETKN(deNTR                            | 1341.6313 | IPI00120674 | IPI00120674 | yes | no  |       | 2 0.0009073  | 127.87 |
| AEQITIHAIGIGEAN(deKTQIR                   | 2162.1808 | IPI00990932 | IPI00990932 | yes | no  |       | 3 7.8977E-08 | 122.14 |
| AEPPIINASAGDQ(deEEK                       | 1554.7162 | IPI00123342 | IPI00123342 | yes | yes | 2,3   | 0.0008162    | 103.83 |
| AEISN(deHTRPVIIVPGCIGNRIEAK               | 2643.4279 | IPI0013350C | IPI0013350C | yes | yes |       | 3 1.4763E-08 | 101.38 |
| AEISN(deHTRPVIIVPGCIGNR                   | 2202.1692 | IPI0013350C | IPI0013350C | yes | yes | 2,3   | 3.7738E-10   | 133.45 |
| AEDYGPVEVISHWHPN(deITINIVDDHTPWVK         | 3480.7103 | IPI00121627 | IPI00121627 | yes | yes | 4,5   | 0.0001006    | 63.115 |
| ADSIYSQVVGISASQAN(deISK                   | 2037.0378 | IPI0011511E | IPI0011511E | yes | yes | 2,3   | 1.2545E-96   | 237    |
| ADN(deYTYEHIR                             | 1280.5786 | IPI0027313E | IPI0027313E | yes | yes |       | 2 0.0011019  | 114.86 |
| ADANPPATEYHWTTIN(deGSIPK                  | 2282.0968 | IPI0031140E | IPI0031140E | yes | yes | 2,3   | 1.3863E-38   | 184.56 |
| ACVSINHVN(deETVMISITIEYAMQQTK             | 2979.4504 | IPI0062466E | IPI0062466E | yes | no  |       | 3 8.6449E-06 | 81.48  |
| ACN(deATNWIEYMFNK                         | 1760.7651 | IPI0013260C | IPI0013260C | yes | no  |       | 2 0.0013249  | 112.72 |
| ACMN(deETRIIEIR                           | 1520.7075 | IPI0039684C | IPI0039684C | yes | no  | 2,3   | 0.0031513    | 118.87 |
| AATCINPINGSVCERPAN(deHSAK                 | 2366.1219 | IPI00224752 | IPI00224752 | yes | yes |       | 3 3.8675E-05 | 92.993 |
| AATCINPIN(deGSVCERPANHSAK                 | 2366.1219 | IPI00224752 | IPI00224752 | yes | yes |       | 3 3.8675E-05 | 92.993 |
| AAN(deCTQVIVWHTR                          | 1554.7725 | IPI00116744 | IPI00116744 | yes | yes | 2,3   | 9.5045E-05   | 148.57 |
| AAIQFIQN(deYTVIASSVDSMDFINDATDVNDAISYVTR  | 4066.947  | IPI0033988E | IPI0033988E | yes | no  |       | 4 7.5388E-27 | 115.77 |
| AAGVIEDVYN(deRTQGIIAGHGIIQIA              | 2578.3867 | IPI00169617 | IPI00169617 | yes | yes |       | 3 1.4806E-55 | 193.85 |
| AAGVIEDVYN(deR                            | 1205.6041 | IPI00169617 | IPI00169617 | yes | yes |       | 2 0.0008847  | 110.08 |
| AAGN(deSSAIGGQGTSGQPQR                    | 1742.8296 | IPI00125182 | IPI00125182 | yes | no  |       | 2 5.8159E-11 | 139.44 |
| AAEN(deFTIIVK                             | 1104.6179 | IPI0047108E | IPI0047108E | yes | no  |       | 2 1.0787E-09 | 157.68 |
| AACAVRPQEVMTMVN(deGTITNPVTGK              | 2513.273  | IPI00308971 | IPI00308971 | yes | yes | 2,3   | 2.1119E-05   | 86.539 |

N-terminal Ser/Thr  
ratio

281  
15.21%

### PNP strategy 2

#### De-glycopeptides Sequence

| De-glycopeptides Sequence                 | Mass      | Proteins    | Leading r:  | Unique (C | Unique (P | Charges | PEP          | Score  |
|-------------------------------------------|-----------|-------------|-------------|-----------|-----------|---------|--------------|--------|
| AAAIKVN(de)DSVPFHIGWNSTER                 | 2311.1709 | IPI0046425E | IPI0046425E | yes       | yes       |         | 3 9.2438E-08 | 125.73 |
| AAAIKVNDSPVPHIGWN(de)STER                 | 2311.1709 | IPI0046425E | IPI0046425E | yes       | yes       |         | 3 9.2438E-08 | 125.73 |
| AACAVRPQEVMTMVN(de)GTITNPVTGK             | 2513.273  | IPI00308971 | IPI00308971 | yes       | yes       |         | 2 3.2299E-10 | 116.35 |
| AAEN(de)FTIIVK                            | 1104.6179 | IPI0047108E | IPI0047108E | yes       | no        |         | 2 0.0002505  | 127.87 |
| AAGMN(de)HTK                              | 828.39122 | IPI0013114E | IPI0013114E | yes       | no        |         | 2 0.017199   | 105.52 |
| AAGVIEDVYN(de)RTQGIIAGHGIIQIA             | 2578.3867 | IPI00169617 | IPI00169617 | yes       | yes       | 2,3     | 9.1159E-16   | 139.02 |
| AAIQFIQN(de)YTVIASSVDSMDFINDATDVNDAISYVTR | 4066.947  | IPI0033988E | IPI0033988E | yes       | no        |         | 4 0.000111   | 61.099 |
| AAN(de)CTQVIVWHTR                         | 1554.7725 | IPI00116744 | IPI00116744 | yes       | yes       | 2,3     | 1.2005E-06   | 153.94 |
| AATCINPIN(de)GSVCERPANHSAK                | 2366.1219 | IPI00224752 | IPI00224752 | yes       | yes       |         | 3 2.3399E-07 | 120.11 |
| AATCINPINGSVCERPAN(de)HSAK                | 2366.1219 | IPI00224752 | IPI00224752 | yes       | yes       |         | 3 2.3399E-07 | 120.11 |
| ACN(de)ATNWIEYMFNK                        | 1760.7651 | IPI0013260C | IPI0013260C | yes       | no        |         | 2 0.011373   | 79.771 |
| ADN(de)YTYEHIR                            | 1280.5786 | IPI0027313E | IPI0027313E | yes       | yes       | 2,3     | 0.0017498    | 111.63 |
| ADSIYSQVVGISASQAN(de)ISK                  | 2037.0378 | IPI0011511E | IPI0011511E | yes       | yes       |         | 3 6.4933E-20 | 160.47 |
| AEDYGPVEVISHWHPN(de)ITINIVDDHTPWVK        | 3480.7103 | IPI00121627 | IPI00121627 | yes       | yes       | 3,4,5   | 5.4646E-96   | 161.04 |
| AEISN(de)HTRPVIIVPGCIGNR                  | 2202.1692 | IPI0013350C | IPI0013350C | yes       | yes       |         | 3 1.3414E-13 | 151.62 |
| AEISN(de)HTRPVIIVPGCIGNRIEAK              | 2643.4279 | IPI0013350C | IPI0013350C | yes       | yes       | 3,4     | 9.8587E-09   | 115.42 |
| AEN(de)QSTNIPGPRNIPNSQMVNIR               | 2606.2983 | IPI0077618E | IPI0077618E | yes       | no        |         | 3 0.011781   | 66.045 |
| AEPPIINASAGDQ(de)EEK                      | 1554.7162 | IPI00123342 | IPI00123342 | yes       | yes       | 2,3     | 1.2037E-33   | 195.6  |
| AEQITIHAIGIGEAN(de)QIR                    | 2162.1808 | IPI00990932 | IPI00990932 | yes       | no        |         | 3 3.4702E-06 | 128.59 |
| AEVIAPPTITVECN(de)GSEAHAR                 | 2221.0797 | IPI00117841 | IPI00117841 | yes       | no        |         | 3 7.9562E-08 | 120.11 |
| AFAMIIDKIEEDINSSMTN(de)STAASRPPVTIR       | 3377.6959 | IPI00128904 | IPI00128904 | yes       | yes       |         | 4 0.0001479  | 68.97  |
| AFFDETKN(de)NTR                           | 1341.6313 | IPI00120674 | IPI00120674 | yes       | no        | 2,3     | 0.0018118    | 113.61 |
| AFIN(de)GTGVETVVSADIPNAHGIAVDWVSR         | 2994.5199 | IPI0011906E | IPI0011906E | yes       | yes       | 3,4     | 3.9069E-90   | 211.5  |
| AFITNF(de)SMIIDGVTPGVVK                   | 2171.1337 | IPI00312711 | IPI00312711 | yes       | no        | 2,3     | 4.0463E-94   | 233.31 |
| AFITNF(de)SMIIDGVTPGVVKEK                 | 2428.2712 | IPI00312711 | IPI00312711 | yes       | no        | 3,4     | 2.9148E-22   | 160.55 |
| AFMN(de)SSFTIDPK                          | 1356.6384 | IPI00121362 | IPI00121362 | yes       | no        | 2,3     | 6.8729E-29   | 149.69 |
| AFN(de)ECCTIANK                           | 1326.5697 | IPI0033083E | IPI0033083E | yes       | yes       |         | 2 1.1412E-30 | 188.91 |
| AFN(de)ITWISTDFK                          | 1441.7242 | IPI0011806E | IPI0011806E | yes       | no        |         | 2 7.9466E-31 | 190.85 |
| AFNISPN(de)DTSSGSCGINIVTIK                | 2294.1213 | IPI0046921E | IPI0046921E | yes       | yes       | 2,3     | 1.7355E-17   | 273.51 |
| AFNISPN(de)DTSSGSCGINIVTIKVENK            | 2764.3702 | IPI0046921E | IPI0046921E | yes       | yes       |         | 3 2.9511E-08 | 109.75 |
| AFPEVCN(de)ETMMAIWEECKPCIK                | 2742.1984 | IPI0032042C | IPI0032042C | yes       | no        | 3,4     | 2.9622E-39   | 184.22 |
| AFQIN(de)TFNIKVQPFNVTK                    | 2108.1419 | IPI00222967 | IPI00222967 | yes       | no        |         | 3 0.0002991  | 117    |
| AFSGSPN(de)ITK                            | 1020.524  | IPI00119522 | IPI00119522 | yes       | yes       |         | 2 0.007393   | 101.39 |
| AFSTIIVN(de)VSGK                          | 1234.6921 | IPI00222921 | IPI00222921 | yes       | no        |         | 2 0.0008965  | 126.95 |
| AFVEN(de)ITVIENSIVFK                      | 1821.9877 | IPI0074238E | IPI0074238E | yes       | no        | 2,3     | 0            | 339.58 |

|                                           |           |             |             |     |     |       |             |        |
|-------------------------------------------|-----------|-------------|-------------|-----|-----|-------|-------------|--------|
| AFYN(de)GTWYR                             | 1176.5352 | IPI0085831E | IPI0085831E | yes | no  | 2     | 0.014021    | 101.11 |
| AGAICISN(de)DTGIGISSVPIQAFK               | 2417.2624 | IPI0012322C | IPI0012322C | yes | yes | 3     | 1.25E-08    | 112.32 |
| AGAICISN(de)DTGIGISSVPIQAFKPFVVEVSIPYSVVR | 4037.1336 | IPI0012322C | IPI0012322C | yes | yes | 3     | 0.0003199   | 61.725 |
| AGEQINNHVKN(de)K                          | 1350.7004 | IPI0011610E | IPI0011610E | yes | no  | 2     | 0.034181    | 89.403 |
| AGEQINNHVKN(de)KTQGK                      | 1764.9231 | IPI0011610E | IPI0011610E | yes | no  | 2,3   | 0.0087803   | 86.548 |
| AGGSATIN(de)CTVTSIIPVGPMPR                | 2101.066  | IPI0084919E | IPI0084919E | yes | no  | 3     | 1.7312E-07  | 107.15 |
| AGIN(de)ASYSEK                            | 1038.4982 | IPI00308971 | IPI00308971 | yes | yes | 2     | 0.016896    | 90.827 |
| AGMASPIYN(de)VTWSAGWK                     | 1837.8821 | IPI00666034 | IPI00666034 | yes | no  | 2,3   | 1.2221E-05  | 132.51 |
| AGPN(de)GTIFVVDAYK                        | 1450.7456 | IPI0022199E | IPI0022199E | yes | yes | 2,3   | 5.4015E-32  | 190.87 |
| AGYFN(de)FTSATITYIAQEDGPVIGSTSAPGQGGIIAQR | 3856.9272 | IPI0046718C | IPI0046718C | yes | yes | 4,5   | 2.6679E-35  | 143.79 |
| AHINN(de)ISFPIR                           | 1280.699  | IPI00876541 | IPI00876541 | yes | yes | 2     | 0.004183    | 97.734 |
| AIAAAGYDVEKN(de)NSR                       | 1577.7798 | IPI00223714 | IPI00223714 | no  | no  | 2     | 0.0008158   | 117.2  |
| AIADVIQDIADDN(de)SSR                      | 1701.817  | IPI0013580E | IPI0013580E | yes | no  | 3     | 0.0011943   | 95.854 |
| AIAGIVYN(de)SSGTEPCYDIYR                  | 2248.047  | IPI0033155C | IPI0033155C | yes | yes | 2,3   | 1.0037E-11C | 248.35 |
| AIDIDPSKTN(de)VSGGAIAIGHPIGGSGSR          | 2646.3725 | IPI0022643C | IPI0022643C | yes | yes | 3,4   | 6.0429E-15E | 171.05 |
| AIEIQFGMN(de)ASSIFFIQGVR                  | 2314.178  | IPI0046921E | IPI0046921E | yes | yes | 2,3   | 2.6699E-59  | 202.03 |
| AIEISTVTCQIN(de)CSDHGHGCDSTFK             | 2779.2    | IPI0045349E | IPI0045349E | yes | no  | 3     | 0.0009742   | 78.794 |
| AIEISTVTCQIN(de)CSDHGHGCDSTFKR            | 2935.3011 | IPI0045349E | IPI0045349E | yes | no  | 4     | 0.018329    | 59.857 |
| AIEVAN(de)GTVTSIPGATVTIICPGK              | 2368.2672 | IPI0012618E | IPI0012618E | yes | yes | 3     | 5.6119E-12  | 117.48 |
| AIGITEMFEPSKAN(de)FTK                     | 1882.9499 | IPI0011506E | IPI0011506E | yes | yes | 2,3   | 0.0012722   | 105.39 |
| AIGYEN(de)ATQAIGR                         | 1362.6892 | IPI0011980E | IPI0011980E | yes | no  | 2     | 5.4381E-54  | 210.91 |
| AIIAN(de)ITCK                             | 1002.5532 | IPI0088030E | IPI0088030E | yes | no  | 2     | 0.0065507   | 107.79 |
| AIIPFNDIHEDPCIITN(de)R                    | 2137.0626 | IPI00113854 | IPI00113854 | yes | no  | 3     | 0.0030227   | 83.106 |
| AIIQGIPEQN(de)YTVQIIAYYK                  | 2437.3257 | IPI0033063E | IPI0033063E | yes | no  | 3     | 3.1138E-08  | 124.63 |
| AIIQGIPEQN(de)YTVQIIAYYKDK                | 2680.4476 | IPI0033063E | IPI0033063E | yes | no  | 3     | 0.0042432   | 77.39  |
| AIIITN(de)VSSVAIGSR                       | 1386.7831 | IPI00930841 | IPI00930841 | yes | yes | 2     | 0.0001603   | 119.54 |
| AIKGETVN(de)TSIPFSFEGIIIFPK               | 2394.2835 | IPI00119324 | IPI00119324 | yes | no  | 3     | 1E-07       | 122.29 |
| AIMDICDQIEKN(de)QTK                       | 1805.8652 | IPI0065863E | IPI0065863E | yes | yes | 2,3   | 9.1E-06     | 142.54 |
| AIMKEVMNII(de)QPINVTK                     | 1941.0791 | IPI0012605C | IPI0012605C | yes | no  | 3     | 0.001159    | 107.69 |
| AIMPFDSDIHDPCIIITN(de)R                   | 2113.9925 | IPI00929801 | IPI00929801 | yes | no  | 2,3   | 3.0197E-12  | 153.86 |
| AIMVISEEPIIYMPPPCQPIIN(de)TTESIR          | 3308.6859 | IPI0027860E | IPI0027860E | yes | yes | 4     | 2.8885E-06  | 95.71  |
| AIN(de)ASANITSDGVEVIGR                    | 1785.9221 | IPI0033063E | IPI0033063E | yes | no  | 2,3   | 6.172E-105  | 240.42 |
| AIN(de)ASQEETGAVFICPWK                    | 2019.9724 | IPI0031515E | IPI0031515E | yes | yes | 2,3   | 1.0666E-08  | 141.6  |
| AIN(de)DSIHYINR                           | 1314.668  | IPI0080834E | IPI0080834E | yes | no  | 3     | 0.0009218   | 110.38 |
| AIN(de)FTIPFFDSSR                         | 1513.7565 | IPI00828867 | IPI00828867 | yes | yes | 2     | 0.0033374   | 97.551 |
| AIN(de)GSAIYTGSSIDFVR                     | 1769.8948 | IPI00877197 | IPI00877197 | yes | no  | 2,3   | 2.1996E-141 | 262.25 |
| AIN(de)VTISSMGR                           | 1147.6019 | IPI00131091 | IPI00131091 | yes | no  | 2     | 0.0004778   | 131.17 |
| AIN(de)VTISSMGRNGIK                       | 1559.8454 | IPI00131091 | IPI00131091 | yes | no  | 2     | 4.8433E-17  | 175.66 |
| AINASAN(de)ITSDGVEVIGR                    | 1785.9221 | IPI0033063E | IPI0033063E | yes | no  | 2,3   | 6.172E-105  | 240.42 |
| AINS(de)STEDGIKR                          | 1289.6575 | IPI0012916E | IPI0012916E | yes | yes | 2     | 0.025942    | 82.543 |
| AISCIES(de)SWKTIEQERNASFVYTK              | 2846.3909 | IPI0012322C | IPI0012322C | yes | yes | 3     | 0.017489    | 64.2   |
| AISPN(de)STISSAPK                         | 1271.6721 | IPI00460291 | IPI00460291 | yes | no  | 2     | 0.0001823   | 140.82 |
| AITIKDIIN(de)GTFSYK                       | 1682.9243 | IPI0012392E | IPI0012392E | yes | no  | 2     | 1.4779E-24  | 186.77 |
| AIVAVDPGN(de)HTAPR                        | 1416.7474 | IPI00129631 | IPI00129631 | yes | yes | 2     | 0.013854    | 77.912 |
| AIVN(de)FTR                               | 819.46029 | IPI0051536C | IPI0051536C | yes | no  | 2     | 0.0090831   | 100.19 |
| AIWIIN(de)GSK                             | 1000.5706 | IPI0012466E | IPI0012466E | yes | yes | 2     | 0.0031096   | 119.68 |
| AKGVAV(de)TNTSQIGFR                       | 1547.842  | IPI0047108E | IPI0047108E | yes | no  | 2,3   | 1.0612E-16  | 169.04 |
| AMFN(de)ITIIYPNNIIAISNMIPK                | 2490.3379 | IPI0031950E | IPI0031950E | yes | yes | 2,3,4 | 2.5972E-12  | 143.57 |
| AMGVNVIAANTHN(de)TSMHMTGSGIYSPEAVR        | 3115.4638 | IPI0023041E | IPI0023041E | yes | yes | 3,4   | 7.5349E-07  | 96.793 |
| AMIINQHVPMESSHIIQFVN(de)WSSIIPER          | 3275.6584 | IPI0038728E | IPI0038728E | yes | yes | 3,4,5 | 5.7022E-28  | 156.88 |
| AMIINQHVPMESSHIIQFVN(de)WSSIIPERYK        | 3566.8167 | IPI0038728E | IPI0038728E | yes | yes | 3,4,5 | 0.0001201   | 77.689 |
| AMIINQHVPMESSHIIQFVN(de)WSSIIPERYKK       | 3694.9116 | IPI0038728E | IPI0038728E | yes | yes | 3,4,5 | 8.3699E-11  | 106.93 |
| AMN(de)ISASSMTITWK                        | 1539.7425 | IPI0046942E | IPI0046942E | yes | no  | 2,3   | 1.4031E-05  | 143.05 |
| AMN(de)TSQVEAMGIQMIPGYR                   | 2095.9853 | IPI0016987C | IPI0016987C | yes | yes | 3     | 2.4267E-05  | 116.06 |
| AMN(de)TSQVEAMGIQMIPGYRDPYHGRPITK         | 3260.5893 | IPI0016987C | IPI0016987C | yes | yes | 4     | 0.024014    | 50.986 |
| AMSN(de)ISVR                              | 876.44874 | IPI0040574E | IPI0040574E | yes | no  | 2     | 5.6341E-33  | 179.37 |
| AMSSN(de)ETAAYK                           | 1171.5179 | IPI0031646E | IPI0031646E | yes | yes | 2     | 6.2524E-10  | 162.49 |
| AN(de)DSDQGANAIDYTFHQAPEVVR               | 2646.1946 | IPI00719927 | IPI00719927 | yes | no  | 3     | 0.0090161   | 61.616 |
| AN(de)DSDQGANAIDYTFHQAPEVVR               | 2802.2957 | IPI00719927 | IPI00719927 | yes | no  | 3     | 1.7145E-07  | 109.5  |
| AN(de)HSGAVVIK                            | 1107.64   | IPI0042083E | IPI0042083E | yes | no  | 2     | 0.006283    | 93.345 |
| AN(de)HSGAVVIKR                           | 1263.7412 | IPI0042083E | IPI0042083E | yes | no  | 2     | 0.016044    | 87.719 |
| AN(de)TSIEIIIIEGVR                        | 1413.7827 | IPI0098851E | IPI0098851E | yes | no  | 2,3   | 6.0419E-10  | 160.48 |
| AN(de)TSQPGVIQGGAVVYCPWGTSPIQCTTIQFDSK    | 3666.7447 | IPI0011597E | IPI0011597E | yes | yes | 4     | 4.1036E-07  | 83.939 |
| AN(de)TTQPGIVEGGQVIK                      | 1610.8628 | IPI0012024E | IPI0012024E | yes | no  | 2,3   | 6.991E-26   | 185.02 |
| ANEQVIQNIN(de)HTYK                        | 1670.8376 | IPI00876541 | IPI00876541 | yes | no  | 2,3   | 3.7705E-07  | 149    |
| ANIQFGENGT(de)TISAVTNK                    | 1863.9327 | IPI00127447 | IPI00127447 | yes | yes | 2,3   | 1.4013E-48  | 205.65 |
| ANIQKGENPSQYGITAFNHPIN(de)ITK             | 2754.4089 | IPI00112614 | IPI00112614 | yes | yes | 3     | 9.6755E-09  | 114.92 |
| ANQVIPHN(de)TTFQTEPTK                     | 2038.0484 | IPI00466371 | IPI01026704 | no  | no  | 2,3   | 3.8786E-48  | 199.58 |
| ANYNIPIMVTDSGKPPMTN(de)ITDIR              | 2660.3302 | IPI0012374E | IPI0012374E | yes | yes | 3     | 0.0016395   | 83.063 |
| APIPTAIDTN(de)SSK                         | 1313.6827 | IPI0011980E | IPI0011980E | yes | no  | 2     | 0.014419    | 79.466 |
| APIPTAIDTN(de)SSKTPSIFPCASGAFSSFR         | 3026.4808 | IPI0011980E | IPI0011980E | yes | no  | 3,4   | 9.9927E-09  | 107.03 |
| APQHVVNHIPPYTN(de)VSIK                    | 2013.0796 | IPI0012304C | IPI0012304C | yes | no  | 3     | 0.0055614   | 78.326 |
| AQAIDKAN(de)ASR                           | 1214.6367 | IPI0011906E | IPI0011906E | yes | yes | 2,3   | 1.1369E-81  | 229.75 |
| AQAECRN(de)TTHIIQR                        | 1696.8427 | IPI0032122E | IPI0032122E | yes | yes | 2     | 0.014268    | 88.087 |
| AQITVTVTQTEHN(de)ITVSQIPAPQTR             | 2918.525  | IPI0033102E | IPI0033102E | yes | yes | 3     | 1.2829E-08  | 108.08 |
| AQTN(de)YTCVAEIIYR                        | 1700.8192 | IPI0032305E | IPI0032305E | yes | no  | 2,3   | 4.8174E-16  | 169.37 |
| AQVAN(de)ISSIIEISR                        | 1556.8522 | IPI0015341E | IPI0015341E | yes | yes | 2,3   | 2.3039E-24  | 180.81 |
| ASGN(de)FSQVDWFIHK                        | 1747.8682 | IPI0046912E | IPI0046912E | yes | no  | 2,3   | 2.2038E-33  | 192.96 |
| ASQQISN(de)ETSSFGFNIR                     | 1997.9807 | IPI0015325E | IPI0015325E | yes | no  | 2,3   | 1.912E-123  | 178.72 |
| ASQQISN(de)ETSSFGFNIRK                    | 2126.0756 | IPI0015325E | IPI0015325E | yes | no  | 2,3   | 2.7722E-07  | 116.6  |
| ASSIMVN(de)ITEIFPKPK                      | 1773.9699 | IPI00406901 | IPI00406901 | yes | no  | 3     | 3.6475E-10E | 249.3  |
| ASVVN(de)VTQHCTMESWESMNEVAR               | 2664.1731 | IPI0012124C | IPI0012124C | yes | yes | 3,4   | 7.3464E-60  | 199.97 |
| ASVVN(de)VTQHCTMESWESMNEVARR              | 2820.2742 | IPI0012124C | IPI0012124C | yes | yes | 3     | 0.050846    | 43.476 |
| ATHAQPAIVTAPN(de)ETSPK                    | 1831.9428 | IPI0013795E | IPI0013795E | yes | yes | 3     | 0.0074292   | 75.018 |
| ATPNEGFFNQN(de)ITTFYYDR                   | 2297.0389 | IPI0031553E | IPI0031553E | yes | yes | 2,3   | 5.7987E-20  | 164.94 |
| ATSQFQN(de)GSIITAFIPGISQCTVYSAK           | 2888.4378 | IPI0034014C | IPI0034014C | yes | yes | 3     | 6.8393E-10  | 115.55 |



|                                             |           |             |             |     |     |       |   |            |        |
|---------------------------------------------|-----------|-------------|-------------|-----|-----|-------|---|------------|--------|
| ATVN(de)DSGEYR                              | 1110.4942 | IPI0012948E | IPI0012948E | yes | no  |       | 2 | 0.0002738  | 125.72 |
| AVAYGEKN(de)ITFQGPIPK                       | 1831.9832 | IPI00111794 | IPI00111794 | yes | no  | 2,3,4 |   | 8.3309E-74 | 225.32 |
| AVGAVDWDSDHPYGYN(de)ITIQAK                  | 2304.1175 | IPI00623114 | IPI00623114 | yes | no  |       | 3 | 1.2793E-11 | 138.08 |
| AVGN(de)STFAIACIQR                          | 1506.7613 | IPI00761772 | IPI00761772 | yes | no  |       | 2 | 0.0014262  | 106.52 |
| AVIGDHGDEIFSVFGSPFIKDGASEEETN(de)ISK        | 3394.6205 | IPI0038728E | IPI0038728E | yes | yes | 3,4   |   | 1.2656E-07 | 98.299 |
| AVISMIN(de)ETMNEAPEETK                      | 2005.9336 | IPI0087541E | IPI0087541E | yes | no  | 2,3   |   | 1.671E-75  | 228.3  |
| AVIVNN(de)ITTGEK                            | 1257.6929 | IPI0012890E | IPI0012890E | yes | yes |       | 2 | 0.01673    | 79.633 |
| AVKIN(de)ETIGNQDK                           | 1428.7573 | IPI0030999E | IPI0030999E | yes | yes |       | 2 | 0.050978   | 76.728 |
| AVKIN(de)ETIGNQDKTAER                       | 1885.9858 | IPI0030999E | IPI0030999E | yes | yes |       | 3 | 7.8277E-60 | 215.48 |
| AVN(de)QTGAIYQCDYSTSR                       | 1932.8636 | IPI00120674 | IPI00120674 | yes | no  |       | 2 | 1.1319E-20 | 171.21 |
| AVTSISHDGSVICTFTAN(de)STYTK                 | 2459.1639 | IPI0045348E | IPI0045348E | yes | yes |       | 3 | 1.058E-12  | 144.27 |
| AVVGSYTTTN(de)VSIIAPR                       | 1747.9468 | IPI00330481 | IPI00330481 | yes | yes | 2,3   |   | 4.8337E-15 | 158.64 |
| AVYEAIRN(de)CSIEDDSVR                       | 1995.932  | IPI00856861 | IPI00856861 | yes | no  |       | 2 | 0.0019527  | 97.235 |
| AWEKEIHHLI(de)QEQNVSNNFIDKEEFFIGSK          | 3500.7365 | IPI00605187 | IPI00605187 | yes | no  | 3,4   |   | 1.736E-26  | 149.18 |
| AWGISVINPNK(de)TK                           | 1426.7932 | IPI0098909E | IPI0098909E | yes | no  |       | 3 | 0.0029178  | 110.8  |
| AWGTPCEICPSVN(de)TSEYK                      | 2097.9136 | IPI00828222 | IPI00828222 | yes | no  | 2,3   |   | 7.7535E-12 | 148.36 |
| AWN(de)YTVDTPHGMFVSGTPEEQSVWITDVGSGPYGHTVK  | 4166.9473 | IPI00228567 | IPI00228567 | yes | yes | 4,5   |   | 5.1652E-35 | 140.27 |
| AWN(de)YTVDTPHGMFVSGTPEEQSVWITDVGSGPYGHTVKK | 4295.0422 | IPI00228567 | IPI00228567 | yes | yes | 4,5   |   | 4.7438E-06 | 65.134 |
| AY(de)AISGPTVQDGIPPFNWNRFNETIHR             | 3099.5315 | IPI00471081 | IPI00471081 | yes | yes | 3,4   |   | 0.0001619  | 91.166 |
| AYTIFVPTN(de)HSIETQGNNSVIGIDTVR             | 2945.4883 | IPI0098726E | IPI0098726E | yes | no  | 3,4   |   | 2.0107E-19 | 144.63 |
| AYTIFVPTNHSIETQGN(de)NSVIGIDTVR             | 2945.4883 | IPI0098726E | IPI0098726E | yes | no  | 3,4   |   | 2.0107E-19 | 144.63 |
| AYVFERN(de)QSVGDPNVDIIR                     | 2191.1022 | IPI00127447 | IPI00127447 | yes | yes | 2,3   |   | 1.2216E-41 | 195.38 |
| AYVPN(de)ATWYDYETGEEIGWR                    | 2419.0757 | IPI0084869E | IPI0084869E | yes | yes | 2,3   |   | 7.3646E-26 | 171.72 |
| CAISHAITIEFHQDGNPENVGIYN(de)ISR             | 3111.4832 | IPI0022242E | IPI0022242E | yes | yes | 3,4,5 |   | 4.5498E-12 | 239.57 |
| CAMDIGVNYIGTVN(de)VTHTGIQCQIWR              | 3005.431  | IPI0011420E | IPI0011420E | yes | yes | 3,4   |   | 1.4296E-22 | 157.28 |
| CCGWVSHYN(de)WTENEEIMGFTK                   | 2647.093  | IPI0010809E | IPI0010809E | yes | no  |       | 3 | 2.9471E-13 | 147.06 |
| CDGDFDCEDRTDEAN(de)CSVK                     | 2291.8365 | IPI0051536C | IPI0051536C | yes | no  |       | 3 | 0.034315   | 69.485 |
| CDGDFDCEDRTDEAN(de)CSVKQPGEVCGPTHFQCVSTNR   | 4346.7416 | IPI0051536C | IPI0051536C | yes | no  |       | 4 | 0.0069943  | 49.944 |
| CEQEASEDIKPAITGN(de)K                       | 1888.8837 | IPI0013480E | IPI0013480E | yes | no  | 2,3   |   | 1.5348E-07 | 138.05 |
| CEQEASEDIKPAITGN(de)KTMQYVPNSHDVK           | 3288.5391 | IPI0013480E | IPI0013480E | yes | no  |       | 4 | 0.033764   | 51.586 |
| CF(de)ANKVNISFPSAQSPASDTHIK                 | 2631.3115 | IPI0062466E | IPI0062466E | yes | yes | 2,3,4 |   | 1.8159E-67 | 204.12 |
| CFMAN(de)GTWGYPFHDGDYIK                     | 2277.9612 | IPI0094758E | IPI0094758E | yes | no  |       | 3 | 7.7606E-20 | 163.8  |
| CFMAN(de)GTWGYPFHDGDYIKDQAIWSECKEPR         | 3777.6439 | IPI0094758E | IPI0094758E | yes | yes |       | 4 | 0.000207   | 67.655 |
| CFNAMEVDAIN(de)SSHPVSTPVENPAQIR             | 2982.3964 | IPI0031859E | IPI0031859E | yes | no  | 3,4   |   | 2.6106E-84 | 218.44 |
| CGNCN(de)ITSIEDEDFCK                        | 1960.7601 | IPI0013759E | IPI0013759E | yes | yes | 2,3   |   | 6.1255E-46 | 207.92 |
| CGPPPAIPNAIPASDVN(de)RTDFESHHTIK            | 3004.4713 | IPI0013480E | IPI0013480E | yes | no  | 3,4   |   | 0.0069127  | 62.064 |
| CGWSPAEIN(de)YTVPGIGSAGEASFISQCMK           | 3245.4468 | IPI00331032 | IPI00331032 | yes | yes |       | 3 | 6.8524E-07 | 100.7  |
| CHAGYIGDNCN(de)CSTDVSTCR                    | 2345.8882 | IPI0037795E | IPI0037795E | yes | yes |       | 3 | 4.6209E-05 | 101.5  |
| CHEGN(de)GTFECGACR                          | 1653.6082 | IPI00132474 | IPI00132474 | yes | yes | 2,3   |   | 7.5876E-05 | 131.69 |
| CIIVGNGGVIAN(de)K                           | 1313.7126 | IPI0031189E | IPI0031189E | yes | no  |       | 2 | 0.0010788  | 125.97 |
| CIN(de)HTTQK                                | 1000.476  | IPI0012526E | IPI0012526E | yes | yes |       | 2 | 0.0021491  | 135.83 |
| CIPHFAMIGN(de)DTVMCTEQGNWTR                 | 2737.1869 | IPI0032246E | IPI0032246E | yes | no  |       | 3 | 3.8324E-49 | 192.18 |
| CIPHFAMIGN(de)DTVMCTEQGNWTRIPPECIEVK        | 3705.687  | IPI0032246E | IPI0032246E | yes | no  | 3,4   |   | 2.2201E-40 | 158.91 |
| CIPHFAMIGNDTVMCTEQGN(de)WTR                 | 2737.1869 | IPI0032246E | IPI0032246E | yes | no  |       | 3 | 3.8324E-49 | 192.18 |
| CIPHFAMIGNDTVMCTEQGN(de)WTRIPPECIEVK        | 3705.687  | IPI0032246E | IPI0032246E | yes | no  | 3,4   |   | 2.2201E-40 | 158.91 |
| CIQIQAINM(de)SSCPIDSR                       | 1991.9227 | IPI0064828E | IPI0064828E | yes | no  |       | 3 | 7.4915E-06 | 134.25 |
| CISKN(de)YTTDIITK                           | 1555.7916 | IPI0012464C | IPI0012464C | yes | yes | 2,3   |   | 0.0005664  | 140.31 |
| CISPN(de)VTSCACTINFTIK                      | 2084.9693 | IPI0038731E | IPI0038731E | yes | yes | 2,3   |   | 6.5941E-12 | 254.82 |
| CISPNVTSCACTIN(de)FTIK                      | 2084.9693 | IPI0038731E | IPI0038731E | yes | yes | 2,3   |   | 6.5941E-12 | 254.82 |
| CIVPHTVN(de)ISSAWR                          | 1638.83   | IPI00129041 | IPI00129041 | yes | no  | 2,3   |   | 0.0019418  | 103.76 |
| CN(de)ITIKDPTPADPIWYEA                      | 2231.0933 | IPI00114842 | IPI00114842 | yes | no  |       | 2 | 0.011223   | 79.676 |
| CN(de)TTQGNEVTSIIR                          | 1591.7624 | IPI0013474E | IPI0013474E | yes | no  |       | 2 | 7.4834E-11 | 160.47 |
| CNQFVDCEDASDEMND(de)CSATDCSSYFR             | 3167.1307 | IPI0011906E | IPI0011906E | yes | yes |       | 3 | 9.3405E-13 | 122.41 |
| CNSVITYN(de)ITPVVQK                         | 1734.8975 | IPI00222967 | IPI00222967 | yes | no  | 2,3   |   | 7.6133E-15 | 277.94 |
| CNTAAPMWIN(de)GSHPSSEIGIVSR                 | 2457.1165 | IPI00128334 | IPI00128334 | yes | yes |       | 3 | 0.015743   | 59.339 |
| CPIITPFN(de)DTNVVHTVNTAIAAFNTQNNGTYFK       | 3681.7886 | IPI0012824E | IPI0012824E | yes | yes | 3,4   |   | 4.4818E-06 | 79.67  |
| CPIITPFNDTNVHTVNTAIAAFNTQNN(de)GTYFK        | 3681.7886 | IPI0012824E | IPI0012824E | yes | yes | 3,4   |   | 4.4818E-06 | 79.67  |
| CQAIDFFPQN(de)ITMR                          | 1739.8123 | IPI0033144C | IPI0033144C | yes | no  |       | 3 | 0.000123   | 124.07 |
| CQAIDFFPQN(de)ITMRWIKDNQPIDAK               | 3048.495  | IPI0033144C | IPI0033144C | yes | no  |       | 3 | 0.054847   | 50.752 |
| CQEI(de)ISVDCSTNNPAQANIRQEINDSIQVAER        | 3671.7268 | IPI0032042C | IPI0032042C | yes | yes |       | 3 | 3.0073E-07 | 93.667 |
| CQIEN(de)GSFKENSQYIPIK                      | 2154.0416 | IPI0033083E | IPI0033083E | yes | yes |       | 3 | 0.013751   | 79.81  |
| CQSPYQMN(de)GSDTVTCVNSR                     | 2202.9092 | IPI0013001C | IPI0013001C | yes | no  |       | 2 | 7.6963E-14 | 153.04 |
| CSGN(de)GTYTCGICECDPGYIGTR                  | 2496.9767 | IPI0037795E | IPI0037795E | yes | no  |       | 3 | 0.0021601  | 76.118 |
| CSIIHSN(de)ISVK                             | 1256.6547 | IPI00133222 | IPI00133222 | yes | no  | 2,3   |   | 2.0537E-41 | 199.82 |
| CTPPPYVENAVMISEN(de)R                       | 1975.9132 | IPI00138061 | IPI00138061 | yes | no  | 2,3   |   | 5.0866E-15 | 157.8  |
| CV(de)VHYENSTVPEKKNITSPVGVQPIINEHTFCAGITK   | 4166.0929 | IPI0040914E | IPI0040914E | yes | yes | 4,5   |   | 1.0327E-11 | 98.189 |
| CVN(de)ESYKK                                | 1026.4804 | IPI0033131E | IPI0033131E | yes | no  |       | 2 | 0.015465   | 128.38 |
| CVVHYEN(de)STVPEK                           | 1560.7242 | IPI0040914E | IPI0040914E | yes | yes |       | 2 | 0.0005456  | 127.02 |
| CVVHYEN(de)STVPEKK                          | 1688.8192 | IPI0040914E | IPI0040914E | yes | yes | 2,3,4 |   | 7.7923E-69 | 225.97 |
| CVVHYENSTVPEKKNITS(de)PVGQPIINEHTFCAGITK    | 4166.0929 | IPI0040914E | IPI0040914E | yes | yes | 4,5   |   | 1.0327E-11 | 98.189 |
| CVYEAICSN(de)VTSECPVVITR                    | 2451.1233 | IPI00405742 | IPI00405742 | yes | no  |       | 2 | 1.5922E-05 | 100.19 |
| CWAPIIDN(de)DTASDNGSR                       | 1890.8166 | IPI0022634E | IPI0022634E | yes | no  |       | 2 | 0.0014888  | 94.544 |
| CWAPIIDNDTASDN(de)GSR                       | 1890.8166 | IPI0022634E | IPI0022634E | yes | no  |       | 2 | 0.0014888  | 94.544 |
| DAAQCSGGSVAHIAEIGIPTN(de)ITHIIIFR           | 3060.5815 | IPI00331407 | IPI00331407 | yes | no  | 3,4   |   | 1.5689E-33 | 162.82 |
| DAGN(de)YTVIITNPISMEK                       | 1864.9241 | IPI0012432E | IPI0012432E | yes | no  | 2,3   |   | 5.2113E-06 | 135.09 |
| DAGVGFPEYQEEDN(de)STYNFR                    | 2336.9822 | IPI00308971 | IPI00308971 | yes | yes |       | 2 | 1.9878E-79 | 221.51 |
| DAMVGN(de)YTCEVTEISR                        | 1843.808  | IPI0012483C | IPI0012483C | yes | no  | 2,3   |   | 2.3233E-11 | 252.82 |
| DATIQUAYISSGN(de)FSK                        | 1600.7733 | IPI0046921E | IPI0046921E | yes | yes |       | 2 | 0.000967   | 108.14 |
| DCDFIEDGEERNCTG(de)K                        | 1943.7626 | IPI0012728C | IPI0012728C | yes | yes | 2,3   |   | 0.0020444  | 107.74 |
| DCVSCQN(de)VSR                              | 1223.5023 | IPI0012119C | IPI0012119C | yes | no  |       | 2 | 6.2617E-23 | 186.74 |
| DDIHPTIPAGQYFIN(de)ITYNYPVHSFDGR            | 3249.552  | IPI0038731E | IPI0038731E | yes | no  | 3,4   |   | 1.102E-62  | 190.67 |
| DDYRPTWTIN(de)QTEPVAGNYYPVNT                | 2969.3944 | IPI0038130E | IPI0038130E | yes | yes | 3,4   |   | 3.7171E-16 | 143.91 |
| DEIGNVSTSHIIIDDSV(de)EMEIRPR                | 2837.4229 | IPI0030903E | IPI0030903E | yes | yes |       | 3 | 1.281E-12  | 126.25 |
| DFIPSTISFTWNYQN(de)NTEVIQGIR                | 2842.3926 | IPI0046805E | IPI0046805E | yes | no  |       | 3 | 0.0004114  | 84.946 |
| DGIAIN(de)ITIR                              | 1084.6241 | IPI0011906E | IPI0011906E | yes | yes |       | 2 | 2.4585E-05 | 145.28 |
| DGIN(de)FSCQAEIDIRPHGGYIIR                  | 2530.2387 | IPI00117424 | IPI00117424 | yes | no  |       | 3 | 0.0011801  | 88.565 |

|                                      |           |             |             |     |     |       |   |             |        |
|--------------------------------------|-----------|-------------|-------------|-----|-----|-------|---|-------------|--------|
| DGQQN(de)ISIIYTEPGASQTQTGASFR        | 2668.2729 | IPI0028481E | IPI0028481E | yes | no  |       | 3 | 1.93E-13    | 130.37 |
| DGSDSAAMVYN(de)SSQEWGIR              | 2071.8905 | IPI00119522 | IPI00119522 | yes | yes | 2,3   |   | 2.3929E-21E | 292.6  |
| DGTSQPAICPQN(de)VTMNMEGIK            | 2290.0392 | IPI00320204 | IPI00320204 | yes | yes | 2,3,4 |   | 7.1154E-08  | 119.37 |
| DGTVTAGN(de)ASGVSDGAGAVIIASEDAVK     | 2531.2351 | IPI0022643C | IPI0022643C | yes | yes |       | 3 | 0.0001385   | 89.297 |
| DHVN(de)VSMIEATDFPFNTTEWEGYIPK       | 3039.396  | IPI00136942 | IPI00136942 | yes | yes |       | 3 | 1.1611E-16  | 140.59 |
| DHVNVSMEIATDFPFN(de)TTEWEGYIPK       | 3039.396  | IPI00136942 | IPI00136942 | yes | yes |       | 3 | 1.1611E-16  | 140.59 |
| DIAVGDDYTN(de)R                      | 1237.5575 | IPI00468674 | IPI00468674 | yes | no  |       | 2 | 0.0045714   | 96.604 |
| DIDMFN(de)ASK                        | 1152.5485 | IPI00224752 | IPI00224752 | yes | yes |       | 2 | 0.0006274   | 115.33 |
| DIDTDFTSN(de)ASQPETK                 | 1767.7799 | IPI00130573 | IPI00130573 | yes | yes |       | 2 | 2.1932E-18  | 170.11 |
| DIEHHITNVN(de)VSYFYDDIVNGTVIK        | 2741.3661 | IPI0046760C | IPI0046760C | yes | yes |       | 3 | 2.2553E-80  | 215.65 |
| DIEHHITNVNVSFYDDIVN(de)GTVIK         | 2741.3661 | IPI0046760C | IPI0046760C | yes | yes |       | 3 | 2.2553E-80  | 215.65 |
| DIFIN(de)VTPDYEENSIIQADVECK          | 2711.2636 | IPI00314132 | IPI00314132 | yes | no  |       | 3 | 0.0006605   | 84.762 |
| DIFTNQSDFADTTKDTTITVIH(de)K          | 2820.4182 | IPI0011610E | IPI0011610E | yes | yes |       | 3 | 6.2969E-08  | 106.86 |
| DIGPAIAN(de)SSHDVK                   | 1422.7103 | IPI00108811 | IPI00108811 | yes | yes | 2,3   |   | 2.4162E-11  | 165.49 |
| DIGTASHN(de)FSGAIPR                  | 1541.7587 | IPI0022982C | IPI0022982C | yes | yes | 2,3   |   | 1.6477E-19  | 178.14 |
| DIIFSDDTECISNIQN(de)K                | 2010.9204 | IPI0047108C | IPI0047108C | yes | no  |       | 2 | 1.226E-236  | 309.15 |
| DIIFSDDTECISNIQN(de)KTTYK            | 2504.1741 | IPI0047108C | IPI0047108C | yes | no  |       | 3 | 0.0048576   | 80.638 |
| DIIHSTGHN(de)ISR                     | 1461.7688 | IPI00223987 | IPI00223987 | yes | yes | 2,3   |   | 0.0002196   | 139.48 |
| DIN(de)STAQNVMFYDMGSGSTVCTIVTYQTVK   | 3329.5254 | IPI00123342 | IPI00123342 | yes | no  | 3,4   |   | 1.6219E-27  | 149.94 |
| DINGNVFQDAVFN(de)QTVTVIER            | 2378.1866 | IPI00110852 | IPI00110852 | yes | no  |       | 3 | 0.0038339   | 77.899 |
| DINSQIEIQN(de)VTNDTHIIGIKPDTTYDIK    | 3511.8046 | IPI00110264 | IPI00110264 | yes | yes | 3,4   |   | 5.7202E-34  | 149.07 |
| DINSQIEIQNVN(de)DTHIIGIKPDTTYDIK     | 3511.8046 | IPI00110264 | IPI00110264 | yes | yes | 3,4   |   | 5.7202E-34  | 149.07 |
| DIQNFIE(de)VTSSVDVK                  | 1806.9    | IPI00990932 | IPI00990932 | yes | no  |       | 2 | 6.0961E-157 | 176.94 |
| DISGN(de)ETHFTGSEVGFIPISCR           | 2550.2173 | IPI00123652 | IPI00123652 | yes | no  |       | 3 | 1.6588E-07  | 109.72 |
| DISHSIYMFFN(de)TSDIR                 | 1944.904  | IPI00114457 | IPI00114457 | yes | yes | 2,3   |   | 3.026E-05   | 130.24 |
| DISVFAPN(de)MTEIHK                   | 1576.8171 | IPI00855103 | IPI00855103 | yes | no  |       | 2 | 0.0001199   | 124.51 |
| DISVFAPN(de)MTEIHKDVTQYR             | 2339.1831 | IPI00855103 | IPI00855103 | yes | no  |       | 3 | 0.0018408   | 88.427 |
| DITNIINNTF(de)IR                     | 1432.7674 | IPI0065003E | IPI0065003E | yes | no  |       | 2 | 0.0026054   | 101.53 |
| DIVGN(de)ITEIESEDIQIEAIIMR           | 2500.2731 | IPI0012239E | IPI0012239E | yes | no  | 2,3   |   | 2.7559E-207 | 197.46 |
| DIVQNVFMSN(de)MSMDIQSHPSSCPK         | 2751.2125 | IPI0012119C | IPI0012119C | yes | no  | 3,4   |   | 3.7107E-12  | 116.73 |
| DIVV(de)EIYSQWMKNPNNTIHPNIR          | 2894.4497 | IPI0031950E | IPI0031950E | yes | no  | 3,4   |   | 5.3323E-12  | 124.08 |
| DIWN(de)VTGAK                        | 1002.5134 | IPI00652107 | IPI00652107 | yes | no  |       | 2 | 0.064725    | 71.555 |
| DIYEYSWVQGPWNSN(de)RTER              | 2399.0931 | IPI00118674 | IPI00118674 | yes | yes |       | 3 | 0.0003995   | 96.673 |
| DKISPIHIA(de)INFSIDPK                | 1907.0516 | IPI0011597E | IPI0011597E | yes | yes |       | 3 | 0.0042392   | 90.707 |
| DKN(de)GTRAEPINASAGDQEEK             | 2226.0513 | IPI00123342 | IPI00123342 | yes | yes |       | 2 | 0.0027333   | 86.727 |
| DKNGTRAEPIN(de)ASAGDQEEK             | 2226.0513 | IPI00123342 | IPI00123342 | yes | yes |       | 2 | 0.0027333   | 86.727 |
| DMEEFVQSSGDHGVVVSIGSMVSN(de)MTEEK    | 3274.4468 | IPI00128137 | IPI00112322 | no  | no  |       | 3 | 3.3225E-77  | 206.33 |
| DMSDEIGCVNVTQCDGPNK(de)FK            | 2413.0348 | IPI00312063 | IPI00312063 | yes | no  |       | 3 | 4.1519E-07  | 111.78 |
| DMSDGFISN(de)ITIQR                   | 1595.7614 | IPI00272381 | IPI00272381 | yes | no  | 2,3   |   | 2.9077E-34  | 198.74 |
| DMWADYIIFMDIDNIITNPDTISIIAEN(de)K    | 3496.7146 | IPI0016987C | IPI0016987C | yes | yes | 3,4   |   | 1.1452E-07  | 105.03 |
| DNATDS(de)VPIR                       | 1086.5306 | IPI00119063 | IPI00119063 | yes | yes |       | 2 | 0.0016828   | 111.86 |
| DNATQEEIIHYIE(de)K                   | 1701.821  | IPI0032119C | IPI0032119C | yes | no  | 2,3   |   | 3.0937E-23  | 181.51 |
| DNQSCVDPHPVN(de)ATIVTR               | 1990.9531 | IPI0013001C | IPI0013001C | yes | no  | 2,3   |   | 1.4013E-48  | 205.65 |
| DNTTC(de)YEFK                        | 1176.4757 | IPI00119063 | IPI00119063 | yes | yes |       | 2 | 0.036794    | 85.958 |
| DNTTC(de)YEFKK                       | 1304.5707 | IPI00119063 | IPI00119063 | yes | yes |       | 2 | 0.0032196   | 112.13 |
| DNVN(de)CSGVYEHEPIEIGK               | 2058.9317 | IPI00947577 | IPI00947577 | yes | yes | 2,3   |   | 5.1879E-12  | 151.41 |
| DQCIVDDITYNVN(de)DTFHK               | 2195.9793 | IPI00975193 | IPI00975193 | yes | no  | 2,3   |   | 9.7815E-75  | 223.11 |
| DQCIVDDITYNVN(de)DTFHKR              | 2352.0805 | IPI00975193 | IPI00975193 | yes | no  | 2,3   |   | 7.2694E-05  | 117.3  |
| DQDCDKF(de)NQCGTCTEFKECHTIQNYTIWR    | 3753.5705 | IPI0012522C | IPI0012522C | yes | no  |       | 4 | 0.025662    | 52.97  |
| DQGNV(de)TDMASMK                     | 1295.5486 | IPI00471081 | IPI00471081 | yes | yes | 2,3   |   | 0.0001473   | 142.85 |
| DSGIWINGFDYTGMSHVTPHIPEIN(de)DTIR    | 3284.5561 | IPI00407222 | IPI00407222 | yes | yes | 3,4   |   | 6.9718E-14  | 117.43 |
| DSSGVINVMIN(de)GSEPK                 | 1645.7981 | IPI0013227E | IPI0013227E | yes | no  |       | 3 | 0.017829    | 69.485 |
| DSYPDGN(de)ITWYR                     | 1485.6525 | IPI0012137E | IPI0012137E | yes | no  |       | 2 | 0.0006367   | 116.01 |
| DSYPDGN(de)ITWYRNGK                  | 1784.8118 | IPI0012137E | IPI0012137E | yes | no  | 2,3   |   | 0.0011039   | 119.25 |
| DTAVEGEEIEVNCTAMASKP(de)ATTIR        | 2692.2684 | IPI00856723 | IPI00856723 | yes | no  | 2,3   |   | 5.8224E-18  | 119.38 |
| DTCAQECSHFNI(de)TK                   | 1709.7138 | IPI00132474 | IPI00132474 | yes | no  | 2,3   |   | 4.4974E-07  | 147.35 |
| DTISIN(de)ATNIK                      | 1188.635  | IPI0012119C | IPI0012119C | yes | no  |       | 2 | 6.3113E-68  | 228.12 |
| DTN(de)GSQFFITTVK                    | 1456.7198 | IPI0013568E | IPI0013568E | yes | yes |       | 2 | 0.00041     | 133.66 |
| DTTGSHTFQGMFGCEITNN(de)R             | 2271.9637 | IPI00137987 | IPI00137987 | yes | yes |       | 3 | 4.3222E-20  | 162.77 |
| DTYVN(de)ASQSIYGSSPR                 | 1743.8064 | IPI00122977 | IPI00122977 | yes | no  |       | 2 | 2.7296E-09  | 150.91 |
| DVGS GTTN(de)NSQACAQFIEQYFHNSDITEFMR | 3566.5467 | IPI00130661 | IPI00130661 | yes | yes | 3,4   |   | 1.0298E-41  | 167.28 |
| DVIWFRPTIIN(de)DTGNYTCMIR            | 2584.2566 | IPI0092988E | IPI0092988E | yes | no  |       | 3 | 3.8589E-16  | 153.86 |
| DVIWFRPTIINDTGN(de)YTTCMIR           | 2584.2566 | IPI0092988E | IPI0092988E | yes | no  |       | 3 | 3.8589E-16  | 153.86 |
| DVTVIEGEVATISCQVN(de)K               | 1960.9776 | IPI00856723 | IPI00856723 | yes | no  |       | 2 | 5.9561E-75  | 225.68 |
| DWCN(de)WTIISR                       | 1349.6187 | IPI00124933 | IPI00124933 | yes | no  |       | 2 | 0.010358    | 97.911 |
| DWIWNQMHIDEEN(de)ESIPHYVGK           | 2867.3337 | IPI0013818C | IPI0013818C | yes | yes | 3,4   |   | 8.512E-42   | 143.71 |
| DWMPNN(de)HSVIIIDDFESPQK             | 2384.1107 | IPI00221833 | IPI00221833 | yes | yes |       | 3 | 1.1545E-09  | 142.26 |
| DYCMYNNNN(de)WTR                     | 1698.6555 | IPI0012177E | IPI0012177E | yes | yes |       | 2 | 0.0001926   | 142.38 |
| DYRPSAGN(de)NSIYQDVTVVK              | 2173.044  | IPI00322463 | IPI00322463 | yes | no  | 2,3   |   | 4.6531E-19  | 159.69 |
| DYYIN(de)KTENEK                      | 1415.6569 | IPI0039684C | IPI0039684C | yes | no  |       | 2 | 0.014501    | 95.477 |
| DYYPIN(de)ESIASIPR                   | 1749.8938 | IPI00121627 | IPI00121627 | yes | yes | 2,3   |   | 1.0491E-24  | 184.99 |
| E(de)AETVRNGIYNITVIAIDADGR           | 2389.2238 | IPI0013820E | IPI0013820E | yes | no  |       | 3 | 0.0056922   | 81.807 |
| EACIQHYVYN(de)ASYIVWK                | 2143.0197 | IPI0012015E | IPI0012015E | yes | yes |       | 2 | 2.7598E-05  | 127.22 |
| EADDYN(de)ITISEVK                    | 1495.7042 | IPI00277141 | IPI00277141 | yes | yes |       | 2 | 4.4184E-07  | 156.24 |
| EADN(de)HTAFIR                       | 1172.5574 | IPI00118333 | IPI00118333 | yes | yes |       | 2 | 0.000294    | 122.69 |
| EAETV(de)RNGIYNITVIAIDADGR           | 2389.2238 | IPI0013820E | IPI0013820E | yes | no  |       | 3 | 0.0056922   | 81.807 |
| EAFIPQGGSVQVN(de)CSSSCK              | 2053.9197 | IPI00122973 | IPI00122973 | yes | no  | 2,3   |   | 1.1424E-19  | 162.09 |
| EAFN(de)ETNQAIQTISR                  | 1720.838  | IPI00112614 | IPI00112614 | yes | yes | 2,3   |   | 5.9618E-11E | 259.29 |
| EAGNASQI(de)FDSWIK                   | 1677.8362 | IPI0013458E | IPI0013458E | yes | yes | 2,3   |   | 1.5764E-24  | 183.23 |
| EAKEN(de)ASR                         | 903.44101 | IPI00124954 | IPI00124954 | yes | yes |       | 2 | 1.1496E-05  | 118.5  |
| EANIT(de)EDQIIFFPK                   | 1663.8457 | IPI00122122 | IPI00122122 | yes | no  | 2,3   |   | 6.4732E-55  | 210.37 |
| EAPFGTNCN(de)ITITSR                  | 1679.7937 | IPI00129253 | IPI00129253 | yes | no  |       | 2 | 1.7435E-05  | 134.25 |
| EAQYN(de)STFR                        | 1114.5043 | IPI00807983 | IPI00807983 | yes | no  |       | 2 | 0.0016233   | 133.23 |
| EASHYSIHDIVISYN(de)TSDSTVFPGAVAK     | 3007.4563 | IPI00222967 | IPI00222967 | yes | no  | 2,3,4 |   | 2.6934E-51  | 183.56 |
| EASN(de)HSSGAGIVQINK                 | 1610.8012 | IPI00108844 | IPI00108844 | yes | no  | 2,3   |   | 5.4976E-68  | 173.28 |
| EASN(de)HSSGAGIVQINKSNDKETVVGR       | 2696.3478 | IPI00108844 | IPI00108844 | yes | no  |       | 3 | 0.0045543   | 73.672 |

|                                                |           |             |             |     |     |       |              |        |
|------------------------------------------------|-----------|-------------|-------------|-----|-----|-------|--------------|--------|
| EASNHSSGAGIVQIN(de)K                           | 1610.8012 | IPI00108844 | IPI00108844 | yes | no  | 2,3   | 5.4976E-68   | 173.28 |
| EASNHSSGAGIVQIN(de)KSNDKETVVGR                 | 2696.3478 | IPI00108844 | IPI00108844 | yes | no  |       | 3 0.0045543  | 73.672 |
| EATIVGEN(de)ETYPR                              | 1477.7049 | IPI00131143 | IPI00131143 | yes | no  |       | 2 3.1756E-10 | 163.99 |
| EAYKN(de)ISIIYSQMOK                            | 1814.9237 | IPI00221706 | IPI00221706 | yes | no  | 2,3   | 9.9117E-17   | 169.64 |
| ECHTIQN(de)YTIWR                               | 1619.7515 | IPI0012522C | IPI0012522C | yes | no  | 2,3   | 3.7762E-68   | 227.93 |
| ECIGN(de)CSEPDDPTK                             | 1620.6396 | IPI0012835E | IPI0012835E | yes | no  |       | 2 0.0030274  | 98.281 |
| ECSPPKAN(de)ITSDEI                             | 1559.7137 | IPI00466733 | IPI00466733 | yes | yes |       | 2 7.1486E-23 | 182.89 |
| ED(de)IIAIRQNFSNITVSTEDQVK                     | 2519.2867 | IPI00129677 | IPI00129677 | yes | no  | 2,3   | 1.6963E-71   | 214.59 |
| EDIIA(de)IRQNFSNITVSTEDQVK                     | 2519.2867 | IPI00129677 | IPI00129677 | yes | no  | 2,3   | 1.6963E-71   | 214.59 |
| EDRPFHQAVVN(de)DTQAFWHNK                       | 2438.1516 | IPI00406901 | IPI00406901 | yes | no  |       | 3 1.087E-25  | 174.87 |
| EDSCQINY(de)SEGPCIGMQR                         | 2271.9195 | IPI00127352 | IPI00127352 | yes | yes | 2,3   | 1.0214E-93   | 232.51 |
| EDTVTITCEGTHNPGN(de)SSTQWFHNGR                 | 2944.2794 | IPI0012948E | IPI0012948E | yes | no  |       | 3 6.118E-68  | 199.99 |
| EEEAIQIDGIN(de)ASQIR                           | 1784.8905 | IPI0012952E | IPI0012952E | yes | yes |       | 2 3.9148E-67 | 159.81 |
| EEN(de)ATIATYPEFGVIDIK                         | 2008.9993 | IPI00124221 | IPI00124221 | yes | no  |       | 2 6.6747E-61 | 214.46 |
| EEQFN(de)STFR                                  | 1156.5149 | IPI0047524E | IPI0047524E | yes | no  |       | 2 1.9361E-06 | 148.56 |
| EETIYDN(de)ATSSVADRK                           | 1910.9222 | IPI00223987 | IPI00223987 | yes | yes | 2,3   | 5.8349E-05   | 126.71 |
| EFEAYVN(de)ASGEHGIVVFSIGSMVSEIPEKK             | 3252.6013 | IPI0041718C | IPI0041718C | yes | no  |       | 4 6.3616E-05 | 82.665 |
| EFQHN(de)STMYK                                 | 1446.6238 | IPI00788443 | IPI00788443 | yes | no  | 2,3   | 0.0019871    | 103.91 |
| EFVENSECIQCHPECIPQAMN(de)ITCTGR                | 3279.3876 | IPI0012119C | IPI0012119C | yes | no  | 3,4   | 2.8804E-59   | 189.19 |
| EGDN(de)ITIQICIGNGNPPPEEFMFYIPGQPEGIR          | 3588.6654 | IPI0012137E | IPI0012137E | yes | no  | 3,4   | 2.7251E-07   | 88.708 |
| EGFSAN(de)YSVIQSSISEDFK                        | 2106.9746 | IPI0012399E | IPI0012399E | yes | yes |       | 2 1.1611E-41 | 189.48 |
| EGKFDEVYDAIAGAHPN(de)ITVYK                     | 2436.1961 | IPI00111163 | IPI00111163 | yes | no  | 3,4   | 2.5432E-39   | 184.83 |
| EGKFDEVYDAIAGAHPN(de)ITVYKK                    | 2564.2911 | IPI00111163 | IPI00111163 | yes | no  | 3,4   | 5.6377E-09   | 129.46 |
| EGN(de)CSAQSGIAWQDCDFKDAEEAATGECTATVVK         | 3662.5196 | IPI0011495E | IPI0011495E | yes | no  | 3,4   | 6.1134E-147  | 243.48 |
| EGN(de)CSAQSGIAWQDCDFKDAEEAATGECTATVVKR        | 3818.6207 | IPI0011495E | IPI0011495E | yes | no  | 3,4   | 1.7371E-26   | 135.84 |
| EGN(de)FTSTFDK                                 | 1144.5037 | IPI0015325E | IPI0015325E | yes | yes |       | 2 0.060137   | 67.153 |
| EGN(de)FTSTFDKK                                | 1272.5986 | IPI0015325E | IPI0015325E | yes | yes | 2,3   | 0.000211     | 144.1  |
| EGPRN(de)ISTCFSSGDIFAAHNISER                   | 2664.2351 | IPI0012342E | IPI0012342E | yes | no  |       | 3 4.1224E-20 | 151.89 |
| EGPRNISTCFSSGDIFAAHN(de)ISER                   | 2664.2351 | IPI0012342E | IPI0012342E | yes | no  |       | 3 4.1224E-20 | 151.89 |
| EGSRTDDEVVQREEEAIQI(de)DGINASQIR               | 3156.5283 | IPI0012952E | IPI0012952E | yes | yes | 3,4   | 1.4282E-21   | 137.38 |
| EHSIFIDIHPVTGIPMN(de)CSVK                      | 2393.1872 | IPI01008227 | IPI01008227 | no  | no  | 2,3,4 | 9.3061E-12   | 140.35 |
| EI(de)QIAGFDPSQDSIGPKNNDSTINNSATTIIGIQDCR      | 4101.9913 | IPI0088174E | IPI0088174E | yes | no  |       | 4 2.1075E-10 | 88.814 |
| EIAN(de)ATTKPEDRNDPMIYK                        | 2432.2006 | IPI00461861 | IPI00461861 | yes | yes |       | 3 0.0026249  | 84.375 |
| EIDDC(de)EQANKIGAINSTISNESK                    | 2535.1759 | IPI00187353 | IPI00187353 | yes | yes |       | 3 4.7563E-08 | 121.44 |
| EIDDCEQANK(de)IGAINSTISNESK                    | 2535.1759 | IPI00187353 | IPI00187353 | yes | yes |       | 3 4.7563E-08 | 121.44 |
| EIGAIYN(de)CSNIAQDIEK                          | 2050.0041 | IPI0022141E | IPI0022141E | yes | no  | 2,3   | 2.7498E-48   | 202.34 |
| EIGVVMYN(de)CSCIAR                             | 1670.7579 | IPI00130624 | IPI00130624 | yes | yes |       | 2 1.0196E-42 | 198.87 |
| EIHHIQEQN(de)VSNVFIDKEEFFIGSK                  | 2986.4825 | IPI00605187 | IPI00605187 | yes | no  | 3,4   | 3.881E-56    | 193.59 |
| EIIMDFAN(de)SSAEITACMVR                        | 2156.9904 | IPI0022170E | IPI0022170E | yes | yes |       | 3 1.1968E-79 | 227    |
| EIIVDEIISN(de)SSTIASYK                         | 1981.0256 | IPI00173181 | IPI00173181 | yes | no  |       | 3 0.007128   | 75.376 |
| EIIVHPN(de)YTR                                 | 1240.6564 | IPI0011375C | IPI0011375C | yes | yes |       | 2 2.9201E-08 | 157.38 |
| EIIYSN(de)GSIIFQMITMK                          | 1987.0159 | IPI0010853E | IPI0010853E | no  | no  | 2,3   | 7.6869E-21C  | 295.79 |
| EIKGDPFTVFPVPHADI(de)ISNMSQDEIAR               | 3085.5179 | IPI0098726E | IPI0098726E | yes | no  |       | 3 9.4499E-22 | 139.47 |
| EIN(de)ISICPVSTSER                             | 1731.8461 | IPI00381303 | IPI00381303 | yes | yes | 2,3   | 1.8516E-08   | 154.51 |
| EIPVIN(de)VSIGPFSTSQVVAR                       | 2112.1579 | IPI00515432 | IPI00515432 | yes | no  | 2,3   | 1.1965E-09   | 142.26 |
| EIQAPIGQSFCCGN(de)ASIVISPAVHIDIISIR            | 3364.7272 | IPI0098909E | IPI0098909E | yes | no  | 3,4   | 2.799E-59    | 184.76 |
| EIQIAGFDPSQDSIGPKNNDSTIN(de)NSATTIIGIQDCR      | 4101.9913 | IPI0088174E | IPI0088174E | yes | no  |       | 4 2.1075E-10 | 88.814 |
| EITD(de)TGKNAVNTYKKNEDDCVVR                    | 2700.2119 | IPI00266264 | IPI00266264 | yes | yes |       | 3 5.9546E-08 | 120.9  |
| EITGIRN(de)ISSQEGSTDVVAR                       | 2131.0869 | IPI0067739E | IPI0067739E | yes | no  |       | 2 6.968E-09  | 137.13 |
| EIVGGIEIFITN(de)TSCR                           | 1807.9138 | IPI0045348E | IPI0045348E | yes | no  |       | 2 4.2326E-05 | 127.83 |
| EIVHQRN(de)TSNIFFSPVSIATAFAMISIGSK             | 3195.6274 | IPI00406302 | IPI00406302 | no  | no  |       | 3 9.6821E-13 | 107.75 |
| EIVSDPIYVEVQGIPIYFIKQPVSN(de)VTR               | 3218.6863 | IPI00121254 | IPI00121254 | yes | yes | 3,4   | 0.0001434    | 89.946 |
| EKEDRPFHQAV(de)VNDTQAFWHNK                     | 2695.2891 | IPI00406901 | IPI00406901 | yes | no  |       | 3 1.0526E-22 | 165.66 |
| EKSCVAITDAFP(de)QNMSR                          | 1952.9084 | IPI00405742 | IPI00405742 | yes | no  |       | 2 0.0025712  | 94.384 |
| EKV(de)ENGSETGPIPEIQPIIEGEVK                   | 2688.3858 | IPI00136012 | IPI00136012 | yes | yes | 2,3,4 | 4.3605E-80   | 213.05 |
| EKVQSIQTIA(de)ANNSAIK                          | 1885.0269 | IPI00129304 | IPI00129304 | yes | yes |       | 3 2.1509E-11 | 148.7  |
| EMDIVFHEHQDN(de)GTQDDSIASVNTDFAFSIYK           | 3886.7632 | IPI0013183C | IPI0013183C | yes | yes |       | 4 0.0008918  | 54.311 |
| EMGNTVMDIIRN(de)YTANATSSR                      | 2343.0947 | IPI0010809E | IPI0010809E | yes | no  |       | 3 0.0011175  | 87.24  |
| EMGNTVMDIIRN(de)YTANATSSREEAWDYVQAQVK          | 3789.7727 | IPI0010809E | IPI0010809E | yes | no  |       | 4 0.011749   | 50.857 |
| EMGNTVMDIIRNYTAN(de)ATSSR                      | 2343.0947 | IPI0010809E | IPI0010809E | yes | no  |       | 3 0.0011175  | 87.24  |
| EMGNTVMDIIRNYTAN(de)ATSSREEAWDYVQAQVK          | 3789.7727 | IPI0010809E | IPI0010809E | yes | no  |       | 4 0.011749   | 50.857 |
| EMIHN(de)ATFCIVPR                              | 1586.7698 | IPI0012553C | IPI0012553C | yes | no  | 2,3   | 0.0016233    | 105.03 |
| EMN(de)CSETISQIQK                              | 1566.7018 | IPI00459134 | IPI00459134 | yes | no  |       | 2 0.0012276  | 107.99 |
| EN(de)GTFSKYEGGVETFAHIIIVIR                    | 2466.2543 | IPI0011813C | IPI0011813C | yes | yes | 3,4   | 2.8913E-10C  | 231.77 |
| EN(de)MTFGSTIVTNP                              | 1537.7446 | IPI00466371 | IPI01026704 | no  | no  | 2,3   | 1.6066E-07   | 153.79 |
| ENGTFISKYEGGVETFAHIIIVIR(de)K                  | 2594.3493 | IPI0011813C | IPI0011813C | yes | yes | 3,4   | 0.0063038    | 74.776 |
| ENIFGIQAGGFQDREEEYYAEPGVTEAEPVATEDAN(de)STDSII | 4633.0892 | IPI00378224 | IPI00378224 | yes | yes |       | 4 0.0086666  | 43.566 |
| ENQN(de)HSYSIK                                 | 1218.5629 | IPI0012024E | IPI0012024E | yes | no  |       | 2 0.022278   | 85.29  |
| ENYAEIIDDGFIKN(de)ITAQICIDKK                   | 2810.416  | IPI0033988E | IPI0033988E | yes | no  | 3,4   | 3.3468E-20   | 150.94 |
| EQEN(de)STIYISFTPK                             | 1655.8043 | IPI00894972 | IPI00894972 | yes | no  |       | 2 2.3279E-23 | 183.23 |
| EQESMMN(de)ITIHIVK                             | 1671.8324 | IPI00990932 | IPI00990932 | yes | no  | 2,3   | 9.2935E-05   | 125.89 |
| EQESMMN(de)ITIHIVKK                            | 1799.9274 | IPI00990932 | IPI00990932 | yes | no  |       | 3 0.033008   | 71.558 |
| EQETCIAPEIEHGNY(de)STTQR                       | 2362.0496 | IPI00122117 | IPI00122117 | yes | yes |       | 3 3.5868E-20 | 163.79 |
| EQIN(de)ISIDHR                                 | 1223.6258 | IPI00127407 | IPI00127407 | yes | no  | 2,3   | 0.0026899    | 108.47 |
| EQN(de)YTCHVHHK                                | 1451.6364 | IPI00850057 | IPI00850057 | yes | no  |       | 2 0.0025784  | 102.4  |
| EQN(de)YTCHVNHEGPEPITIR                        | 2406.1386 | IPI0031298C | IPI0031298C | yes | no  |       | 3 1.455E-06  | 126.84 |
| EQN(de)YTCHVYHEGPEPITIR                        | 2455.159  | IPI00608044 | IPI00608044 | yes | no  | 2,3   | 1.9447E-20   | 165.66 |
| EQN(de)YTCR                                    | 969.39743 | IPI0010999E | IPI0010999E | yes | no  |       | 2 0.049796   | 88.948 |
| EQSFQGSN(de)MTIFYR                             | 1706.7723 | IPI00453571 | IPI00453571 | yes | no  |       | 2 7.2206E-11 | 160.47 |
| EQTVSDPFIVVSN(de)TSTFVPYEIK                    | 2599.3058 | IPI00785371 | IPI00785371 | yes | no  |       | 3 0.014645   | 60.272 |
| EQVTVIN(de)R                                   | 957.52434 | IPI0012015E | IPI0012015E | yes | yes |       | 2 0.0092827  | 109.29 |
| EREDVQAIN(de)ISVPYGPPIEDFQR                    | 2671.3242 | IPI01023131 | IPI01023131 | yes | no  |       | 3 0.0036868  | 79.143 |
| ERTEVIIQGTVS(de)PNASAPDAVWEDYEFK               | 3150.5146 | IPI00405437 | IPI00405437 | yes | no  |       | 3 1.375E-08  | 108.32 |
| ESGIN(de)MTIPEENQPVVFNHIYNIK                   | 2785.3745 | IPI0040393E | IPI0040393E | yes | no  |       | 3 4.04E-27   | 162.42 |
| ESGIQN(de)VSTCR                                | 1249.5721 | IPI01008227 | IPI01008227 | no  | no  |       | 2 1.2131E-41 | 203.61 |
| ESIIPVTIQCND(de)ITSSSHTIMYSYWTR                | 3086.4841 | IPI00757771 | IPI00757771 | yes | no  |       | 3 0.0016528  | 68.369 |

|                                                |           |             |             |     |     |         |   |            |        |
|------------------------------------------------|-----------|-------------|-------------|-----|-----|---------|---|------------|--------|
| ESNPITAQQTT(de)KIDAPTNIQFVNETDR                | 3030.4894 | IPI00975193 | IPI00975193 | yes | no  |         | 3 | 3.288E-75  | 147.87 |
| ESQTIGDQCVYN(de)STHIGFQR                       | 2339.0601 | IPI0011813C | IPI0011813C | yes | yes | 2,3     |   | 2.407E-191 | 288.78 |
| ESQTIGDQCVYN(de)STHIGFQRENGTFSK                | 3102.4101 | IPI0011813C | IPI0011813C | yes | yes |         | 3 | 4.7249E-13 | 121.33 |
| ESQTIGDQCVYNSTHIGFQREN(de)GTFSK                | 3102.4101 | IPI0011813C | IPI0011813C | yes | yes |         | 3 | 4.7249E-13 | 121.33 |
| ESSEHPWK(de)WTDNTEYNNTIPIRGEER                 | 3187.4595 | IPI0027643C | IPI0027643C | yes | yes | 3,4     |   | 5.0836E-09 | 115.39 |
| ESYIIISN(de)STMK                               | 1384.6908 | IPI0012392E | IPI0012392E | yes | no  |         | 2 | 0.0021704  | 102.87 |
| ETAEYAAN(de)ITQAVFDYFEDYFAMEYAIPK              | 3409.5377 | IPI0013458E | IPI0013458E | yes | no  |         | 3 | 0.0011728  | 63.372 |
| ETFIIN(de)TTCVK                                | 1324.6697 | IPI0013819E | IPI0013819E | yes | yes |         | 2 | 0.0004095  | 116.03 |
| ETIVTIFDN(de)R                                 | 1206.6245 | IPI0012723E | IPI0012723E | yes | no  |         | 2 | 0.0011551  | 113.63 |
| ETMPEYN(de)ISITAR                              | 1523.729  | IPI0012961E | IPI0012961E | yes | yes |         | 2 | 0.012937   | 80.312 |
| ETVCIN(de)ATMCFHVK                             | 1708.7735 | IPI00466371 | IPI01026704 | no  | no  |         | 2 | 0.0005004  | 113.72 |
| ETYFN(de)ISK                                   | 1000.4866 | IPI0015325E | IPI0015325E | yes | no  |         | 2 | 0.0072582  | 103.55 |
| ETYFN(de)ISKK                                  | 1128.5815 | IPI0015325E | IPI0015325E | yes | no  |         | 2 | 0.006552   | 127.76 |
| ETYIETN(de)YTIK                                | 1373.6715 | IPI0012015E | IPI0012015E | yes | yes |         | 2 | 0.0096114  | 87.667 |
| EVHFFVNAS(de)DVDSVK                            | 1691.8155 | IPI0031004E | IPI0031004E | yes | yes | 2,3     |   | 2.8034E-08 | 152.94 |
| EVMN(de)FTAENIYK                               | 1457.6861 | IPI0017000E | IPI0017000E | yes | no  |         | 2 | 0.0009556  | 111.39 |
| EVMNIIQPIN(de)VTK                              | 1497.8225 | IPI0012605C | IPI0012605C | yes | no  |         | 2 | 8.6857E-42 | 198.85 |
| EVN(de)ITVIDRK                                 | 1185.6717 | IPI0011138E | IPI0011138E | yes | no  |         | 2 | 0.0003539  | 133.07 |
| EVNSQIDNNGCSTQEVN(de)ITEIQSK                   | 2706.2403 | IPI0012322E | IPI0012322E | yes | yes | 2,3,4   |   | 1.5246E-14 | 251.12 |
| EVNSQIDNNGCSTQEVN(de)ITEIQSKK                  | 2834.3352 | IPI0012322E | IPI0012322E | yes | yes |         | 3 | 5.3449E-08 | 109.37 |
| EVNVYMYIAN(de)GSAFNISNK                        | 2133.0201 | IPI00222967 | IPI00222967 | yes | no  | 2,3     |   | 1.8917E-42 | 197.14 |
| EVNVYMYIAN(de)GSAFNISKNISFWDAPIGSSYMCNK        | 4103.8856 | IPI00222967 | IPI00222967 | yes | no  |         | 4 | 0.031493   | 47.159 |
| EVNVYMYIANGSAFN(de)ISNK                        | 2133.0201 | IPI00222967 | IPI00222967 | yes | no  | 2,3     |   | 1.8917E-42 | 197.14 |
| EVNVYMYIANGSAFN(de)ISKNISFWDAPIGSSYMCNK        | 4103.8856 | IPI00222967 | IPI00222967 | yes | no  |         | 4 | 0.031493   | 47.159 |
| EVTEGGVVTVN(de)CSIQEEKPIFFK                    | 2706.3575 | IPI00406901 | IPI00406901 | yes | no  |         | 3 | 1.2602E-15 | 139.81 |
| EVTEGGVVTVN(de)CSIQEEKPIFFKIEK                 | 3076.5791 | IPI00406901 | IPI00406901 | yes | no  | 3,4     |   | 9.3292E-05 | 93.804 |
| EVTVIGVATAPTQVISNGIPVSN(de)FTYSPDNK            | 3217.6507 | IPI0011196C | IPI0011196C | yes | yes | 3,4     |   | 5.4441E-05 | 71.882 |
| EWIPIN(de)HSVNSVVVR                            | 1747.937  | IPI0022475E | IPI0022475E | yes | yes | 2,3     |   | 5.8567E-06 | 138.73 |
| EWN(de)GTYHCIFR                                | 1481.651  | IPI00876541 | IPI00876541 | yes | no  | 2,3     |   | 0.003391   | 100.04 |
| EYEGAVYPDND(de)TTDFQR                          | 1903.8224 | IPI00605187 | IPI00605187 | yes | no  |         | 2 | 2.028E-34  | 190.82 |
| F(de)APPQPAEPWSFVNKNTTSYPPMCSQDAVGGQVISEIFTNR  | 4453.1147 | IPI0038728E | IPI0038728E | yes | yes |         | 5 | 0.0094011  | 44.023 |
| F(de)APPQPAEPWSFVNKNTTSYPPMCSQDAVGGQVISEIFTNRK | 4581.2097 | IPI0038728E | IPI0038728E | yes | yes |         | 7 | 0.019202   | 42.669 |
| F(de)APPQPAEPWSSVKNATTYPPMCSQDAAR              | 3203.4805 | IPI0012839E | IPI0012839E | yes | yes |         | 3 | 0.0001289  | 86.791 |
| F(de)DEFFSQGCAPGYEKNSTICDICIPIK                | 3252.4566 | IPI0013978E | IPI0013978E | yes | no  | 2,3,4,5 |   | 7.842E-77  | 208.72 |
| F(de)EDGVIDPGYPRNISEGFSGIPDNVDAAFAIPAHR        | 3742.8016 | IPI0012924C | IPI0012924C | yes | yes |         | 4 | 0.013852   | 45.836 |
| F(de)IRNGIASGSGNCSTGPNGDGFSHAWSIIEVK           | 3334.5789 | IPI00322497 | IPI00322497 | yes | yes |         | 4 | 0.0002821  | 67.496 |
| FAEIN(de)GSAICSYNIKPSEYITTSK                   | 2692.3054 | IPI00421237 | IPI00421237 | yes | no  | 3,4     |   | 0.0078553  | 70.094 |
| FAIKDYR(de)PSAGNNSIYQDTVVFVK                   | 2745.4126 | IPI0032246E | IPI0032246E | yes | no  | 3,4     |   | 3.9584E-13 | 134.32 |
| FAKNEDSN(de)FTIINHDNTANITVK                    | 2832.4042 | IPI0013818C | IPI0013818C | yes | yes |         | 3 | 1.833E-26  | 160.2  |
| FAKNEDSNFTIINHDNTAN(de)ITVK                    | 2832.4042 | IPI0013818C | IPI0013818C | yes | yes |         | 3 | 1.833E-26  | 160.2  |
| FANEYPNI(de)TR                                 | 1223.5935 | IPI0013057E | IPI0013057E | yes | yes |         | 2 | 0.015815   | 91.961 |
| FAPPEAPEPWSG(de)VRDGTSPQAICPQNVTMMEGK          | 3810.7804 | IPI00320204 | IPI00320204 | yes | yes |         | 4 | 0.0018248  | 54.732 |
| FAQPQWHIIHIN(de)GTFSNETEPDTEPCVDGWVYDR         | 4057.833  | IPI0022634E | IPI0022634E | yes | no  |         | 4 | 2.4984E-05 | 70.57  |
| FAQPQWHIIHINGTFSN(de)ETEPDTEPCVDGWVYDR         | 4057.833  | IPI0022634E | IPI0022634E | yes | no  |         | 4 | 2.4984E-05 | 70.57  |
| FAVESIVPSSISIMHSPDAQN(de)MSEVSISPMEISTFR       | 4019.9319 | IPI00114044 | IPI00114044 | yes | yes | 3,4,5   |   | 1.3771E-12 | 96.707 |
| FCIIDVMSTGSSSVGN(de)ATR                        | 2000.9296 | IPI0074965E | IPI0074965E | yes | no  | 2,3     |   | 3.1806E-05 | 118.55 |
| FCNIVPTEHCFIGN(de)GTEYR                        | 2313.0307 | IPI00227857 | IPI00227857 | yes | yes | 2,3     |   | 5.8304E-14 | 154.26 |
| FDAAGTSVHGGVPQN(de)GSICAHIPMIK                 | 2663.2948 | IPI0031553E | IPI0031553E | yes | yes | 3,4     |   | 6.5515E-37 | 177.87 |
| FDGEPDQSN(de)ITWFIK                            | 2068.9564 | IPI0062526E | IPI0062526E | yes | no  | 2,3     |   | 4.4653E-15 | 159.34 |
| FDKGPFEKN(de)CSVQCAGMTIQTPIK                   | 2868.3972 | IPI0032060E | IPI0032060E | yes | no  |         | 3 | 0.0014427  | 84.327 |
| FFN(de)DSIVDPVDSEWFGFYR                        | 2339.0535 | IPI0033131E | IPI0033131E | yes | no  |         | 2 | 4.7296E-65 | 211.33 |
| FFN(de)FSWR                                    | 1002.4712 | IPI0039684C | IPI0039684C | yes | no  | 1,2     |   | 0.0010163  | 130.27 |
| FFQAFTKN(de)GSGATIPGAGANVQTIR                  | 2552.3136 | IPI00223231 | IPI00223231 | yes | no  |         | 3 | 1.1085E-15 | 137.23 |
| FGEFGN(de)YSIIVQHASSGANK                       | 2125.0229 | IPI0031748E | IPI0031748E | yes | no  | 2,3     |   | 2.62E-128  | 257.73 |
| FGHSPIIN(de)ITGGISHASDVVIYHQHK                 | 2826.4565 | IPI0011906E | IPI0011906E | yes | yes | 3,4,5   |   | 8.6317E-29 | 167.53 |
| FGIN(de)GSYAPGPAGIPGVPGK                       | 1854.9628 | IPI0028481E | IPI0028481E | yes | no  |         | 2 | 1.4146E-10 | 117.26 |
| FGN(de)ETFIHIDNGR                              | 1631.8056 | IPI0017035E | IPI0017035E | yes | yes | 2,3     |   | 6.4633E-07 | 148.68 |
| FGTCSQICN(de)NTK                               | 1428.6126 | IPI0011906E | IPI0011906E | yes | yes | 2,3     |   | 6.1482E-31 | 192.65 |
| FGYIIHTDN(de)R                                 | 1234.6095 | IPI0047520E | IPI0047520E | yes | no  |         | 2 | 0.0030545  | 107.24 |
| FHSDINI(de)SESIIPAVIEK                         | 2011.0626 | IPI00831484 | IPI00831484 | yes | yes |         | 3 | 9.7146E-07 | 136.01 |
| FHVHQPVTQPFIQVTN(de)TTVK                       | 2320.2328 | IPI00658311 | IPI00658311 | yes | no  | 2,3,4   |   | 1.6093E-80 | 229.02 |
| FHVNY(de)TQPIVAVK                              | 1514.8245 | IPI00123704 | IPI00123704 | yes | no  | 2,3     |   | 0.0028993  | 99.531 |
| FI(de)EAGIYEVPIITDSGNPPKSNISIIR                | 3055.6594 | IPI00323134 | IPI00323134 | yes | no  | 3,4     |   | 5.532E-64  | 198.64 |
| FIEPYN(de)DSIQAQK                              | 1551.7569 | IPI00123704 | IPI00123704 | yes | yes |         | 2 | 0.0006051  | 128.31 |
| FIEYVTSECHFYN(de)GTQHVR                        | 2386.0801 | IPI0047458C | IPI0047458C | yes | no  | 2,3     |   | 2.4014E-11 | 147.24 |
| FIFKN(de)QTIEIHVIYGR                           | 2074.1364 | IPI0012297E | IPI0012297E | yes | no  | 2,3,4   |   | 3.8252E-10 | 242.42 |
| FIKGN(de)KIQCVDGNWTTIPVCIEEER                  | 3215.6107 | IPI0013001C | IPI0013001C | yes | no  | 3,4     |   | 1.2672E-29 | 161.53 |
| FIN(de)ISSTGIR                                 | 1106.6084 | IPI0013189E | IPI0013189E | yes | yes |         | 2 | 0.0057342  | 103.34 |
| FINYN(de)QTVSR                                 | 1240.62   | IPI0022693E | IPI0022693E | yes | no  |         | 2 | 0.0026223  | 108.7  |
| FIQ(de)KHINANPSEPATIIFTAAR                     | 2525.3391 | IPI00421157 | IPI00421157 | yes | yes |         | 3 | 0.0029843  | 81.356 |
| FIQSAEFFNY(de)TVR                              | 1620.7936 | IPI0012740E | IPI0012740E | yes | yes | 2,3     |   | 8.0802E-68 | 220.97 |
| FIRNGIASG(de)SGNCSTGPNGDGFSHAWSIIEVK           | 3334.5789 | IPI00322497 | IPI00322497 | yes | yes |         | 4 | 0.0002821  | 67.496 |
| FITDVERN(de)ETAIYHVEAFK                        | 2281.1379 | IPI0046673E | IPI0046673E | yes | no  |         | 3 | 1.963E-41  | 193.32 |
| FIWSEPQN(de)CSATK                              | 1566.7137 | IPI00118987 | IPI00118987 | yes | no  |         | 2 | 0.0004286  | 133.15 |
| FMEFFVQFPHN(de)ATQTMNIR                        | 2228.0659 | IPI0013651E | IPI0013651E | yes | yes |         | 3 | 0.0020118  | 84.14  |
| FMGIPTKDDNIEHYKN(de)STVMAR                     | 2566.2308 | IPI0012392E | IPI0012392E | yes | no  |         | 3 | 0.0088704  | 73.688 |
| FN(de)ETIHR                                    | 915.45626 | IPI00471081 | IPI00471081 | yes | yes |         | 2 | 0.012023   | 114.5  |
| FN(de)ETRDITISIVSDINVR                         | 2079.0596 | IPI0099093E | IPI0099093E | yes | yes |         | 3 | 1.0561E-11 | 153.22 |
| FN(de)HTDRTIETIK                               | 1473.7576 | IPI00378224 | IPI00378224 | yes | yes | 2,3     |   | 0.0021052  | 120.57 |
| FN(de)ITETPEADIHQGFGNIIQSISQPEDQDQINIGNAMFIEK  | 4601.202  | IPI0013183C | IPI0013183C | yes | no  |         | 4 | 3.3988E-05 | 57.325 |
| FNSTE(de)YQVVTR                                | 1342.6517 | IPI0011906E | IPI0011906E | yes | no  |         | 2 | 1.6869E-10 | 166.48 |
| FPMIPQEIFEIQFN(de)ISIQDQHQAIQFR                | 3482.7155 | IPI0011980E | IPI0011980E | yes | yes |         | 4 | 6.9572E-05 | 85.35  |
| FQIIN(de)FSSSEIK                               | 1411.7347 | IPI0085672E | IPI0085672E | yes | no  |         | 2 | 0.0006073  | 132.97 |
| FQISPQIQFSPEEVIGMVIN(de)YSR                    | 2681.3523 | IPI0012334E | IPI0012334E | yes | no  | 2,3     |   | 1.9578E-11 | 219.22 |
| FQN(de)FSMATDQR                                | 1343.5928 | IPI0012817E | IPI0012817E | yes | no  |         | 2 | 0.00123    | 106.49 |
| FQN(de)YTICESFSK                               | 1522.6762 | IPI00118291 | IPI00118291 | yes | no  |         | 2 | 0.000861   | 125.03 |



|                                            |           |             |             |     |     |       |   |             |        |
|--------------------------------------------|-----------|-------------|-------------|-----|-----|-------|---|-------------|--------|
| FQSSAVMAIQEASEAYIVGIFEDTN(de)ICAIHAK       | 3512.6956 | IPI0028284E | IPI0028284E | yes | no  |       | 3 | 1.003E-70   | 192.85 |
| FSATEVPEKGAGEVSP(de)AEHSSKPTNISAK          | 2954.4621 | IPI0023071E | IPI0023071E | yes | no  |       | 3 | 1.2109E-75  | 201.29 |
| FSEIIVNN(de)ATEEIIVK                       | 1817.9775 | IPI0032119C | IPI0032119C | yes | no  |       | 2 | 2.4203E-57  | 209.31 |
| FSHN(de)GTCAAEGK                           | 1277.5459 | IPI0032067E | IPI0032067E | yes | yes | 2,3   |   | 1.6756E-06  | 154.1  |
| FSIMN(de)QSIISIPGSPFISR                    | 2093.0979 | IPI0033797E | IPI0033797E | yes | no  |       | 3 | 0.010013    | 69.485 |
| FMSDXYDIQDVIADVGIKIDFTN(de)QSDFADTTK       | 3699.7138 | IPI0011610E | IPI0011610E | yes | no  | 3,4   |   | 8.7393E-59  | 179.86 |
| FSPPVVN(de)VTWIR                           | 1413.7769 | IPI0011080E | IPI0011080E | yes | no  |       | 3 | 0.0008523   | 127.87 |
| FSVN(de)QTTIITHEK                          | 1516.7886 | IPI0084869E | IPI0084869E | yes | yes | 2,3   |   | 9.0018E-42  | 198.85 |
| FSWNN(de)ITNSIDIANISADFQGRPVDPTGAFANGSITFK | 4200.0189 | IPI0045943E | IPI0045943E | yes | yes |       | 4 | 0.012822    | 47.044 |
| FSWNNITNSIDIAN(de)ISADFQGRPVDPTGAFANGSITFK | 4200.0189 | IPI0045943E | IPI0045943E | yes | yes |       | 4 | 0.012822    | 47.044 |
| FSWNNITNSIDIANISADFQGRPVDPTGAFAN(de)GSITFK | 4200.0189 | IPI0045943E | IPI0045943E | yes | yes |       | 4 | 0.012822    | 47.044 |
| FTAPDTIFAN(de)GSVYPPNEGFCPCR               | 2716.205  | IPI01008227 | IPI01008227 | no  | no  | 2,3,4 |   | 1.0425E-35  | 176.65 |
| FTAPDTIFAN(de)GSVYPPNEGFCPCR               | 2716.205  | IPI01008227 | IPI01008227 | no  | no  | 2,3,4 |   | 1.0425E-35  | 176.65 |
| FTCN(de)QTTDVIIIHHSK                       | 1775.8876 | IPI0031950E | IPI0031950E | yes | yes | 2,3   |   | 6.1226E-44  | 201.3  |
| FTCN(de)QTTDVIIIHHSK                       | 1903.9826 | IPI0031950E | IPI0031950E | yes | yes |       | 3 | 0.0050139   | 87.519 |
| FTECCHEERPIN(de)TSAIK                      | 2090.9514 | IPI0087623E | IPI0087623E | yes | no  | 2,3   |   | 0.017429    | 78.505 |
| FTFTSHTPGDHQICIHNS(de)STR                  | 2442.1135 | IPI0015346E | IPI0015346E | yes | no  | 2,3,4 |   | 5.4064E-31  | 175.56 |
| FTFTSHTPGEHQICIHNS(de)STK                  | 2428.123  | IPI0047368C | IPI0047368C | yes | no  | 2,3,4 |   | 4.4812E-20E | 222.7  |
| FTQDAYSAVVKEN(de)STEAR                     | 2014.9596 | IPI00623114 | IPI00623114 | yes | no  | 2,3   |   | 8.8565E-13  | 157.22 |
| FVHVN(de)TSAIK                             | 1227.6976 | IPI0015363E | IPI0015363E | yes | yes | 2,3   |   | 0.0025784   | 102.4  |
| FVKN(de)ITTWNEMKPGFYHGHISYIDFAK            | 3242.6012 | IPI00131021 | IPI00131021 | yes | yes |       | 4 | 0.0035649   | 67.194 |
| FVPNSNMN(de)FTGQAYSGR                      | 1888.8526 | IPI0010853E | IPI0010853E | no  | no  | 2,3   |   | 4.4516E-37  | 194.23 |
| FYPEDIQIWIENGN(de)VSR                      | 2192.0902 | IPI0012915E | IPI0012915E | no  | no  |       | 3 | 0.0002007   | 112.8  |
| GAAAPSAPHWN(de)ETAEK                       | 1635.7641 | IPI0064828E | IPI0064828E | yes | no  |       | 2 | 0.0008044   | 104.94 |
| GAFFPIKEDN(de)WSIPNR                       | 1889.9424 | IPI0013556C | IPI0013556C | yes | no  | 2,3   |   | 0.0001168   | 128.22 |
| GAFISN(de)FTMTVNGMTFTSSIK                  | 2253.081  | IPI0097043E | IPI0097043E | yes | no  | 2,3   |   | 2.4141E-23  | 166.61 |
| GAFVSKNPCN(de)ITR                          | 1462.7351 | IPI0030796E | IPI0030796E | yes | yes | 2,3   |   | 0.0006328   | 139.48 |
| GAFVSKNPCN(de)ITREDYAPIVK                  | 2378.2053 | IPI0030796E | IPI0030796E | yes | yes | 2,3,4 |   | 2.2617E-30  | 174.87 |
| GAGEVSPAESHSSKPTN(de)ISAK                  | 1965.9756 | IPI0023071E | IPI0023071E | yes | no  | 2,3,4 |   | 1.1409E-32  | 181.64 |
| GAIDIMIQVN(de)MTPGHSSAPPK                  | 2163.0816 | IPI0022407E | IPI0022407E | yes | yes | 2,3,4 |   | 1.4529E-49  | 198.14 |
| GAIQIPTVSFSHEESN(de)TTAIAEFGYIR            | 3066.4934 | IPI0022407E | IPI0022407E | yes | yes | 3,4   |   | 2.7165E-41  | 171.84 |
| GAIQIPTVSFSHEESN(de)TTAIAEFGYIRK           | 3194.5884 | IPI0022407E | IPI0022407E | yes | yes | 3,4   |   | 4.8253E-07  | 105.32 |
| GAMITHQNIIN(de)DCSGFIK                     | 2017.9714 | IPI0011254E | IPI0011254E | yes | no  | 2,3   |   | 4.4783E-37  | 190.19 |
| GCADYCNQ(de)TITKR                          | 1585.6977 | IPI0098726E | IPI0098726E | yes | no  |       | 3 | 0.0063486   | 98.353 |
| GCGSIPGCPGTAGFHSN(de)QTFHFHK               | 2576.1689 | IPI0011847E | IPI0011847E | yes | yes |       | 3 | 0.0014632   | 74.325 |
| GCIWEASN(de)TTR                            | 1293.5772 | IPI0084869E | IPI0084869E | yes | yes |       | 2 | 7.8055E-42  | 205.56 |
| GCKDNA(de)TDSVPIR                          | 1431.6776 | IPI0011906E | IPI0011906E | yes | yes | 2,3   |   | 3.3051E-06  | 154.1  |
| GDDIYTNV(de)TVSIVEAIVGFEMDITHIDGHK         | 3287.602  | IPI00320241 | IPI00320241 | yes | yes |       | 4 | 8.8051E-34  | 160.84 |
| GDEKENITA(de)EAIDISIK                      | 1844.9367 | IPI0012472E | IPI0012472E | yes | no  | 2,3   |   | 3.6579E-15  | 165.45 |
| GDGPFTVFPHADIIISN(de)MSQDEIAR              | 2715.2963 | IPI0098726E | IPI0098726E | yes | no  |       | 3 | 4.0363E-35  | 168.81 |
| GDHHQISHYN(de)ITGVR                        | 1732.8394 | IPI0033820E | IPI0033820E | yes | no  |       | 2 | 0.0004449   | 114.63 |
| GDN(de)QSPIEIHK                            | 1337.6575 | IPI0022189C | IPI0022189C | yes | yes | 2,3   |   | 1.5965E-41  | 199.31 |
| GDPSIISVN(de)GTDFTFR                       | 1724.837  | IPI0046349E | IPI0046349E | yes | yes | 2,3   |   | 1.0599E-12C | 260.24 |
| GDSGGAIVFIDN(de)ETQR                       | 1677.7958 | IPI0046706E | IPI0046706E | yes | no  |       | 2 | 3.6758E-13  | 162.59 |
| GDHTHTQIIEGIQFN(de)ITQTSEADIHK             | 2795.3726 | IPI0040630E | IPI0040630E | no  | no  | 3,4   |   | 1.9372E-12E | 244.31 |
| GDTVARPIIHEFYDDN(de)NTWGIDR                | 2703.2677 | IPI0084869E | IPI0084869E | yes | yes |       | 3 | 1.3028E-27  | 134.32 |
| GECYYTN(de)GTQR                            | 1347.5514 | IPI0011091C | IPI0011091C | yes | no  |       | 2 | 0.01085     | 85.554 |
| GEIN(de)STIFSSR                            | 1209.599  | IPI0046006E | IPI0046006E | yes | no  |       | 2 | 0.0005828   | 125.03 |
| GEIN(de)STIFSSRPK                          | 1434.7467 | IPI0046006E | IPI0046006E | yes | no  | 2,3   |   | 4.4346E-82  | 230.96 |
| GEIQSEN(de)SSITISSNR                       | 1807.8548 | IPI00466371 | IPI01026704 | no  | no  | 2,3   |   | 3.8437E-90  | 239.75 |
| GENPSQYGITAFNHPIN(de)ITK                   | 2200.0913 | IPI00112614 | IPI00112614 | yes | yes |       | 3 | 1.6605E-05  | 116.98 |
| GETASIIICN(de)ISVR                         | 1418.7188 | IPI0032134E | IPI0032134E | yes | no  |       | 2 | 0.0001093   | 143.46 |
| GFDTYFGYIIGSEDIYTHEACAPIESIN(de)GTR        | 3545.5722 | IPI0065235E | IPI0065235E | yes | no  |       | 3 | 4.3338E-06  | 80.359 |
| GFFGPDCTQCPGGFSNPCYKGN(de)CSDGVR           | 3197.2848 | IPI0098726E | IPI0098726E | yes | no  |       | 3 | 8.7463E-06  | 96.303 |
| GFFVQPTVFSN(de)VTDEMR                      | 1972.9353 | IPI0033636E | IPI0062666E | no  | no  | 2,3   |   | 7.0085E-48  | 207.4  |
| GFGVAFVGN(de)YTGSIPNEAAINTVR               | 2453.2339 | IPI00165807 | IPI00165807 | yes | no  | 2,3   |   | 1.3161E-56  | 195.46 |
| GFIIAN(de)ATYK                             | 1096.5917 | IPI00124497 | IPI00124497 | yes | no  |       | 2 | 0.0016013   | 112.13 |
| GFN(de)ATYHVR                              | 1063.5199 | IPI0041102E | IPI0041102E | yes | yes |       | 2 | 0.0033778   | 123.63 |
| GFPQIIGAAGN(de)VSAGSVIIR                   | 1926.0687 | IPI0075485E | IPI0075485E | yes | no  | 2,3   |   | 4.8535E-55  | 156.11 |
| GFQWVTGDN(de)HTSYSR                        | 1753.7808 | IPI0012942E | IPI0012942E | yes | yes |       | 2 | 4.4324E-25  | 187    |
| GFTQIQTIIPQDVPCPGGSNAWDN(de)VTSFK          | 3289.6078 | IPI0047127E | IPI0047127E | yes | no  |       | 4 | 0.0077594   | 51.586 |
| GFTQIQTIIPQDVPCPGGSNAWDN(de)VTSFKDK        | 3532.7297 | IPI0047127E | IPI0047127E | yes | no  |       | 3 | 3.8636E-06  | 83.788 |
| GGIN(de)ITAVTVTAENDHTVAFIGTSDGR            | 2715.3464 | IPI0040574E | IPI0040574E | yes | no  |       | 3 | 5.4781E-06  | 98.121 |
| GGITINANISG(de)DAFIK                       | 1589.8413 | IPI0013458E | IPI0013458E | yes | no  |       | 2 | 0.0007812   | 114.27 |
| GGNSNGAICHFFPIYNNRN(de)YTDCTSEGR           | 3220.3839 | IPI0097519E | IPI0097519E | yes | no  |       | 3 | 1.7793E-08  | 110.9  |
| GGQEPVNEGTCVITYHN(de)GTGFCR                | 2599.0638 | IPI0046790E | IPI0046790E | yes | no  |       | 3 | 0.0001632   | 93.269 |
| GHAHIAAVNHDSYN(de)FSHR                     | 2145.0253 | IPI0013336E | IPI0013336E | yes | no  | 3,4   |   | 3.7821E-09  | 140.22 |
| GHAIGISCQSEN(de)GTAPITYHIMK                | 2484.189  | IPI00406901 | IPI00406901 | yes | no  | 3,4   |   | 1.3181E-31  | 175.56 |
| GHFYNN(de)ISDVR                            | 1369.6415 | IPI0013556C | IPI0013556C | yes | no  |       | 2 | 0.0004575   | 119.76 |
| GHICN(de)QTQNIQSSK                         | 1613.758  | IPI0098788E | IPI0098788E | yes | yes | 2,3   |   | 0.0023395   | 101.75 |
| GHIIAQVATNPQGITGTGN(de)TTSEMDPSSHR         | 3102.5153 | IPI0032137E | IPI0032137E | yes | no  | 3,4   |   | 2.092E-52   | 186.96 |
| GHIIAQVATNPQGITGTGN(de)TTSEMDPSSHRK        | 3230.6102 | IPI0032137E | IPI0032137E | yes | no  | 3,4   |   | 9.1124E-16  | 120.33 |
| GHTDRCDEAQAIQVWN(de)DTHPEVISQKPFDK         | 3520.643  | IPI0010800E | IPI0010800E | yes | no  |       | 4 | 0.0041575   | 61.109 |
| GHVDPAN(de)DTFDIDPR                        | 1667.754  | IPI00453501 | IPI00453501 | yes | no  | 2,3   |   | 0.0019923   | 99.011 |
| GIAEVTEN(de)VTEGGVTK                       | 1602.8101 | IPI00130271 | IPI00130271 | yes | no  |       | 2 | 1.8824E-13E | 269.92 |
| GIAN(de)ISNFIR                             | 1103.6087 | IPI0012915E | IPI0012915E | no  | no  | 1,2   |   | 6.9245E-07  | 152.7  |
| GICPIFCHTN(de)GTPIGIGAR                    | 2040.0033 | IPI00420791 | IPI00420791 | yes | no  |       | 3 | 0.0003773   | 93.754 |
| GIFPDGSHEISGN(de)TSITPDK                   | 2070.9858 | IPI0089497E | IPI0089497E | yes | no  |       | 3 | 6.9997E-06  | 123.14 |
| GIIGHNN(de)KSSASFR                         | 1486.7641 | IPI0016287C | IPI0016287C | yes | yes |       | 2 | 0.0001498   | 139.48 |
| GIIGISN(de)ATYWHIPDTAYPGIYR                | 2690.3857 | IPI00458077 | IPI00458077 | yes | yes |       | 3 | 2.9295E-08  | 106.86 |
| GIIN(de)ATISVAEINHPVTTYK                   | 2140.1528 | IPI0013057E | IPI0013057E | yes | yes | 2,3   |   | 1.05E-215   | 293.01 |
| GIMIIIN(de)DTQHFSNNVK                      | 1942.9935 | IPI00312711 | IPI00312711 | yes | no  | 2,3   |   | 4.7974E-74  | 221.85 |
| GIMIIIN(de)DTQHFSNNVKGEIGQFYR              | 2893.4545 | IPI00312711 | IPI00312711 | yes | no  |       | 3 | 3.7843E-16  | 143.57 |
| GIMVGN(de)GSVIGVVQAVDAETGK                 | 2100.0885 | IPI0034215E | IPI0034215E | yes | no  | 2,3   |   | 7.8924E-101 | 233.28 |
| GINIT(de)EDTYKPR                           | 1405.7201 | IPI0011980E | IPI0011980E | yes | yes | 2,3   |   | 7.458E-42   | 207.47 |
| GIRGPN(de)FTSPASITFTTGKPPQDIEAK            | 2942.5502 | IPI0045841E | IPI0045841E | yes | no  | 3,4   |   | 0.0011037   | 73.546 |

|                                                 |           |             |             |     |     |       |             |        |
|-------------------------------------------------|-----------|-------------|-------------|-----|-----|-------|-------------|--------|
| GISYQIIGN(de)HSK                                | 1315.6884 | IPI00623114 | IPI00623114 | yes | no  | 3     | 0.0065839   | 90.653 |
| GIVIGPIHKNQKDEIN(de)ETDIK                       | 2360.27   | IPI00930882 | IPI00930882 | yes | no  | 3     | 0.0004866   | 93.495 |
| GIVISEDN(de)HTCQVPVICK                          | 2068.0081 | IPI00453489 | IPI00453489 | yes | no  | 3     | 0.014718    | 68.919 |
| GIVMNYPHITN(de)ITTIGQSVEYR                      | 2505.2686 | IPI00130573 | IPI00130573 | yes | yes | 3     | 1.4261E-48  | 190.23 |
| GIVSGGVYNSHVGCIPYTIPPCEHHVNG(de)SRPPCTGEGDTPR   | 4430.0379 | IPI00113517 | IPI00113517 | yes | yes | 4,5   | 5.7082E-05  | 60.645 |
| GIVTVKPCYN(de)YCSNIMR                           | 2073.9798 | IPI00312407 | IPI00312407 | yes | yes | 3     | 0.00112     | 108.71 |
| GIWKIPFSPENTREEDFYVN(de)ETSTVK                  | 3085.5033 | IPI00116109 | IPI00116109 | yes | yes | 3,4   | 3.9498E-13  | 128.67 |
| GIYHIN(de)ITVGGIPFK                             | 1627.9086 | IPI00115539 | IPI00115539 | yes | yes | 3     | 3.3234E-05  | 130.1  |
| GIYHIN(de)ITVGGIPFKESEIVQPINPR                  | 2890.5705 | IPI00115539 | IPI00115539 | yes | yes | 3     | 0.0013248   | 78.975 |
| GKNN(de)QTECFNHVR                               | 1602.7321 | IPI00124669 | IPI00124669 | yes | no  | 2,3   | 9.7367E-06  | 147.33 |
| GKSN(de)QTECFNFIR                               | 1599.7464 | IPI00890869 | IPI00890869 | yes | yes | 2     | 0.0018062   | 127.71 |
| GMNYN(de)SSVVK                                  | 1097.5175 | IPI00416289 | IPI00416289 | yes | yes | 2     | 0.0030098   | 107.03 |
| GMVIDENSNN(de)ITGAVISVTGINHDVTSGEHGDYFR         | 3717.7329 | IPI00128260 | IPI00128260 | yes | yes | 3,4   | 3.3096E-12  | 97.877 |
| GN(de)HSIFGIEVATIGQGPDCPSVNER                   | 2653.2555 | IPI00459432 | IPI00459432 | yes | yes | 3,4   | 2.8076E-16  | 139.95 |
| GN(de)ISTEKFVEEIK                               | 1492.7773 | IPI00466371 | IPI01026704 | no  | no  | 2     | 0.0015656   | 119.25 |
| GN(de)ITEYQCHQYITK                              | 1753.8094 | IPI00122399 | IPI00122399 | yes | no  | 2,3   | 7.1933E-13  | 267.47 |
| GN(de)MTWYAAGK                                  | 1097.4964 | IPI00120953 | IPI00120953 | yes | yes | 2     | 0.0002581   | 126.67 |
| GN(de)QSSQWIYEAMAK                              | 1611.7351 | IPI00137792 | IPI00137792 | yes | yes | 2     | 0.0005308   | 113.47 |
| GN(de)SSIYPVSPSIQQIVIEK                         | 2157.1681 | IPI00985989 | IPI00985989 | yes | no  | 2,3   | 6.1068E-07  | 132.74 |
| GN(de)TTAIDKEIAR                                | 1287.6783 | IPI00108539 | IPI00108539 | no  | no  | 2,3   | 1.3881E-21  | 181.67 |
| GNYDFVEAMIVNN(de)HTSIDVER                       | 2422.1223 | IPI00403589 | IPI00403589 | yes | yes | 3     | 1.2175E-48  | 194.27 |
| GNYGWQAGN(de)HSAFWGMTIDEGIR                     | 2566.1448 | IPI00115459 | IPI00115459 | yes | no  | 2,3   | 3.5759E-31  | 171.07 |
| GPCSHICIIINYN(de)R                              | 1602.7395 | IPI00119063 | IPI00119063 | yes | yes | 2,3   | 0.0005225   | 117.98 |
| GPDGTEGISSTVN(de)GSTDPSAVTDIR                   | 2432.1303 | IPI00469429 | IPI00469429 | yes | no  | 2,3   | 1.137E-125  | 246.77 |
| GPDISN(de)CTSHWVNQIAQK                          | 2053.964  | IPI00876559 | IPI00876559 | yes | no  | 3     | 7.2136E-27  | 139.49 |
| GPECSQNY(de)TAPTGVIK                            | 1720.809  | IPI00123999 | IPI00123999 | yes | yes | 2     | 0.025307    | 65.477 |
| GPGIKPN(de)QTSK                                 | 1125.6142 | IPI00221429 | IPI00221429 | yes | yes | 2     | 5.6723E-06  | 152.7  |
| GPGSKN(de)CTGCSAGIIMDDNR                        | 2337.0148 | IPI00138199 | IPI00138199 | yes | yes | 3     | 1.6572E-07  | 118.52 |
| GPIANPIWN(de)VTGFTGR                            | 1698.8842 | IPI00123040 | IPI00123040 | yes | no  | 3     | 0.0005276   | 114.31 |
| GPICIDCTDGGFFSIQRN(de)ETHSICSACDESK             | 3663.5157 | IPI00111289 | IPI00111289 | yes | yes | 3,4   | 2.1993E-05  | 75.868 |
| GPIDIN(de)MSEIAMDDIHEIFSRDPAIK                  | 2926.4205 | IPI00125747 | IPI00125747 | yes | yes | 4     | 0.015148    | 61.345 |
| GPN(de)VTVITGTR                                 | 1226.6983 | IPI00877260 | IPI00877260 | yes | no  | 2     | 0.013534    | 82.069 |
| GPNKIQC(de)VDGNWTTIPVCIEEER                     | 2714.2792 | IPI00130010 | IPI00130010 | yes | no  | 3     | 1.3917E-07  | 116.73 |
| GPVKMPSQASAGNVYPQ(de)PIINSSMCIEDSR              | 3232.5315 | IPI00224752 | IPI00224752 | yes | yes | 4     | 0.0032187   | 60.621 |
| GQTGIGFIYASGIGVN(de)SSQAK                       | 2054.0433 | IPI00131143 | IPI00131143 | yes | no  | 2,3   | 1.1048E-100 | 234.39 |
| GQTQNYST(de)IIIEEASER                           | 1937.933  | IPI00124669 | IPI00124669 | yes | no  | 2,3   | 2.3424E-60  | 215.51 |
| GRADECAIPYIGATCYCDIFCN(de)R                     | 2781.1768 | IPI00115459 | IPI00115459 | yes | no  | 3     | 5.7787E-179 | 277.6  |
| GRHN(de)CSEPIDMEDISSGIGVTR                      | 2429.1064 | IPI00115892 | IPI00115892 | yes | yes | 3     | 3.754E-22   | 158.44 |
| GSAIPHPNSN(de)ATWEIK                            | 1606.8104 | IPI00119299 | IPI00119299 | yes | no  | 2,3   | 3.0774E-24  | 178.23 |
| GSEVEDEDIEIFN(de)TSVQIRPPSTAPGPETAFFIER         | 3800.8381 | IPI00381357 | IPI00381357 | yes | no  | 3,4   | 4.5698E-68  | 182.54 |
| GSEVEDEDIEIFN(de)TSVQIRPPSTAPGPETAFFIERIEMEQAQK | 4758.2971 | IPI00381357 | IPI00381357 | yes | no  | 5     | 4.8446E-05  | 59.401 |
| GSIN(de)VSYNIGPGFTGSEYSR                        | 2103.9861 | IPI00113042 | IPI00113042 | yes | no  | 2,3   | 4.1971E-110 | 242.22 |
| GSIQSANDISSQTQGFQIHSMDN(de)ISAQIQTVR            | 3460.6641 | IPI00330594 | IPI00330594 | yes | yes | 3,4   | 4.6516E-59  | 179.81 |
| GSN(de)FTAICVIK                                 | 1208.6223 | IPI00120159 | IPI00120159 | yes | yes | 2     | 5.7312E-15  | 171.32 |
| GSNFN(de)ISK                                    | 865.42938 | IPI00113057 | IPI00113057 | yes | yes | 2     | 0.0043509   | 132.88 |
| GSNFN(de)ISKTDNIEECQK                           | 1982.9004 | IPI00113057 | IPI00113057 | yes | yes | 3     | 0.011785    | 82.102 |
| GSPGN(de)ASQGSIIHSPQIAIQADPR                    | 2537.2735 | IPI00114044 | IPI00114044 | yes | yes | 2,3   | 1.1593E-09  | 115.88 |
| GSTQYIENIGFN(de)MSK                             | 1687.7876 | IPI00116109 | IPI00116109 | yes | yes | 2,3   | 6.4796E-44  | 200.55 |
| GTAGNAIMDGASQIVGEN(de)R                         | 1859.8796 | IPI00279079 | IPI00279079 | yes | yes | 2,3   | 1.4407E-167 | 271.92 |
| GTCEQGSPSIVTPPKDIWN(de)VTGAK                    | 2454.2213 | IPI00652107 | IPI00652107 | yes | no  | 3     | 6.3602E-08  | 119.38 |
| GTDN(de)ITVR                                    | 874.45084 | IPI00652679 | IPI00652679 | yes | no  | 2     | 0.0089756   | 111.61 |
| GTDPSISPSPAATPPAPGAEISYIN(de)HTFR               | 2950.4461 | IPI00762091 | IPI00762091 | yes | yes | 3     | 1.6374E-19  | 130.3  |
| GTFTDCAIANM(de)TQQIR                            | 1825.8451 | IPI00621027 | IPI00621027 | yes | no  | 2,3   | 1.8952E-139 | 260.85 |
| GTIIGIDIQN(de)CSIK                              | 1530.8076 | IPI00471273 | IPI00471273 | yes | no  | 2     | 3.8549E-23  | 179.79 |
| GTTN(de)TTSAGVPCQR                              | 1448.6678 | IPI00330542 | IPI00330542 | yes | no  | 2     | 0.0048641   | 88.561 |
| GTTVITSISSVIHDS(de)KEFPNPEMFDPGHFINGNGNFK       | 4032.9316 | IPI00134503 | IPI00134503 | yes | no  | 4     | 7.0467E-05  | 64.213 |
| GTTVITSISSVIHDSKE(de)FPNPEMFDPGHFINGNGNFK       | 4032.9316 | IPI00134503 | IPI00134503 | yes | no  | 4     | 7.0467E-05  | 64.213 |
| GTYTIQGIIGCEIASDN(de)SSVPTAVFAINGEEFMK          | 3618.7222 | IPI00322497 | IPI00322497 | yes | yes | 4     | 1.2524E-05  | 71.117 |
| GV(de)JIMVGNETTYEDGHGARKNITDIVEGAK              | 3073.5139 | IPI00649189 | IPI00649189 | yes | no  | 3     | 6.4525E-19  | 128.38 |
| GVAVTN(de)TSQIGFR                               | 1348.7099 | IPI00471089 | IPI00471089 | yes | no  | 2     | 2.8113E-31  | 194.12 |
| GVDIDAPYYNYIISFTVPDIDN(de)VTVIDYDAR             | 3535.7035 | IPI00119063 | IPI00119063 | yes | yes | 4     | 0.0027928   | 53.679 |
| GVDIN(de)ATGEWK                                 | 1188.5775 | IPI00848693 | IPI00848693 | yes | yes | 2     | 0.0064791   | 93.011 |
| GVDSCHGDSGGAFQVFN(de)VTVPK                      | 2445.1383 | IPI00653679 | IPI00653679 | yes | no  | 3     | 3.9893E-13  | 128.05 |
| GVENDVFIRYPNN(de)GSIVWGK                        | 2263.1386 | IPI00848693 | IPI00848693 | yes | yes | 2,3   | 3.249E-11   | 122.44 |
| GVFITNE(de)TGQPIIGK                             | 1572.8512 | IPI00111960 | IPI00111960 | yes | no  | 2,3   | 2.8998E-137 | 260.96 |
| GVHFSPAASGITTSTVQVQGIPEYAN(de)YTFTVK            | 3369.6881 | IPI00120222 | IPI00120222 | yes | yes | 3     | 1.9119E-11  | 108.5  |
| GVIMVGN(de)ETTYEDGHGAR                          | 1904.8687 | IPI00649189 | IPI00649189 | yes | no  | 2,3   | 1.4515E-37  | 192.16 |
| GVIMVGN(de)ETTYEDGHGARKNITDIVEGAK               | 3073.5139 | IPI00649189 | IPI00649189 | yes | no  | 3     | 6.4525E-19  | 128.38 |
| GVIPGEDWTVFQSN(de)HSTYEPVIAK                    | 2786.3915 | IPI00404189 | IPI00404189 | yes | no  | 3,4   | 1.505E-05   | 98.269 |
| GVN(de)ETIIVNEIK                                | 1327.7347 | IPI00338019 | IPI00338019 | yes | no  | 2     | 2.5294E-05  | 146.77 |
| GVN(de)VTMPSQPGVPPISSTQIQIDPAIQEFQIVDISR        | 3860.9982 | IPI00515360 | IPI00515360 | yes | no  | 3,4   | 9.3196E-13  | 103.14 |
| GVN(de)VTMPSQPGVPPISSTQIQIDPAIQEFQIVDISRR       | 4017.0994 | IPI00515360 | IPI00515360 | yes | no  | 4,5   | 1.3436E-08  | 82.126 |
| GVNVITVN(de)ATDADSK                             | 1502.7577 | IPI00623114 | IPI00623114 | yes | no  | 2     | 1.5254E-17  | 174.39 |
| GVQIIVFPEDGIHGFN(de)FTR                         | 2145.1007 | IPI00321379 | IPI00321379 | yes | no  | 2,3,4 | 1.4626E-19  | 160.47 |
| GVSSSEN(de)FTSPVMEFWER                          | 2087.9259 | IPI00466652 | IPI00466652 | yes | no  | 2,3   | 1.6978E-89  | 235.24 |
| GVSSSEN(de)FTSPVMEFWERR                         | 2244.027  | IPI00466652 | IPI00466652 | yes | no  | 3     | 0.0020701   | 87.647 |
| GVTHIN(de)ISGIK                                 | 1137.6506 | IPI00119063 | IPI00119063 | yes | yes | 2,3   | 1.1819E-09  | 158.04 |
| GVTHIN(de)ISGIKMPR                              | 1521.845  | IPI00119063 | IPI00119063 | yes | yes | 3     | 0.012462    | 90.614 |
| GVTNDIISVQGNTPSWIN(de)KTEK                      | 2457.25   | IPI00344689 | IPI00344689 | yes | yes | 3     | 2.6561E-06  | 105.77 |
| GVTSVSQIFHSPDIAIRDYVN(de)ASQSIYGSSPR            | 3551.7645 | IPI00122977 | IPI00122977 | yes | no  | 3,4   | 7.6098E-59  | 181.24 |
| GVVTDEQGIPIAN(de)ATISVSGINHGVK                  | 2575.3606 | IPI00875870 | IPI00875870 | yes | no  | 3     | 4.4446E-06  | 102.66 |
| GWIN(de)GSIVGFYK                                | 1339.6925 | IPI00134589 | IPI00134589 | yes | no  | 2     | 1.5091E-54  | 218.06 |
| GWKENPVEFDSIFN(de)ESK                           | 2024.948  | IPI00129070 | IPI00129070 | yes | no  | 2,3   | 2.0153E-20  | 173.87 |
| GYIITIN(de)FTK                                  | 1168.6492 | IPI00469219 | IPI00469219 | yes | yes | 2     | 1.0374E-97  | 240.1  |
| GYIITIN(de)FTKNTTR                              | 1640.8886 | IPI00469219 | IPI00469219 | yes | yes | 2,3   | 4.4704E-83  | 235.22 |
| GYIITINFTKN(de)TTR                              | 1640.8886 | IPI00469219 | IPI00469219 | yes | yes | 2,3   | 4.4704E-83  | 235.22 |

|                                              |           |             |             |     |     |       |              |        |
|----------------------------------------------|-----------|-------------|-------------|-----|-----|-------|--------------|--------|
| GYITSEMFN(de)STFK                            | 1670.765  | IPI00262024 | IPI00262024 | yes | no  | 2,3   | 3.972E-136   | 268.93 |
| GYPGCGN(de)KTASSVIEITCAK                     | 2111.998  | IPI00308971 | IPI00308971 | yes | yes |       | 3 0.0012309  | 91.401 |
| GYPGDEGGPGERGPPGVN(de)GTQGFQGCQGR            | 2984.322  | IPI00830749 | IPI00830749 | yes | yes |       | 3 0.0006392  | 68.97  |
| HAEISFVITDGVVTGN(de)DSIEESVHSMR              | 2976.3924 | IPI00621027 | IPI00621027 | yes | yes |       | 3 1.1399E-60 | 151.01 |
| HAIEYFNN(de)NTGSHIFAIR                       | 2240.0875 | IPI00400202 | IPI00400202 | yes | no  |       | 3 0.0010065  | 88.19  |
| HAN(de)CSQVGTVVTCTCIPDYEGDGWSCR              | 3128.2845 | IPI00987269 | IPI00987269 | yes | no  |       | 3 0.0001103  | 86.08  |
| HAN(de)WTITPIK                               | 1179.64   | IPI00317359 | IPI00317359 | yes | yes | 2,3   | 7.3331E-11   | 166.14 |
| HDPN(de)MTCDYVIK                             | 1491.6486 | IPI00119299 | IPI00119299 | yes | no  |       | 2 0.0005942  | 132.79 |
| HDYIIPEGAITN(de)TTR                          | 1812.937  | IPI00121421 | IPI00121421 | yes | no  |       | 2 0.0005777  | 112.5  |
| HEEGHMIN(de)CTCFGQGR                         | 1931.7825 | IPI00975193 | IPI00975193 | yes | no  | 2,3   | 0.00225      | 88.561 |
| HEN(de)NTKDNSIQHEFSITR                       | 2169.0199 | IPI00109727 | IPI00109727 | yes | yes | 2,3   | 2.3317E-08   | 142.97 |
| HF(de)IIDSNSVTRPSEFNWIWIPIPIK                | 3331.7758 | IPI00319509 | IPI00319509 | yes | no  |       | 3 0.060377   | 49.638 |
| HFFNVSDIEIAIVT(de)IVK                        | 1830.988  | IPI00466371 | IPI01026704 | no  | no  | 2,3   | 4.3044E-45   | 200.94 |
| HFKGQTQN(de)YSTIIIEASER                      | 2350.1553 | IPI00124669 | IPI00124669 | yes | no  | 2,3,4 | 1.663E-32    | 178.51 |
| HFN(de)DSGACVPR                              | 1258.5513 | IPI00468814 | IPI00468814 | yes | yes |       | 2 0.005258   | 95.094 |
| HGFYCYIIGSTISTFTDAN(de)HTCTNEK               | 3036.3382 | IPI00126189 | IPI00126189 | yes | yes |       | 3 2.3854E-36 | 177.09 |
| HGHFTGFN(de)GSTIR                            | 1429.6851 | IPI00117989 | IPI00117989 | yes | yes |       | 2 0.017862   | 76.588 |
| HGQIIKN(de)FTIIQGPGR                         | 1972.1007 | IPI00129304 | IPI00129304 | yes | yes | 3,4   | 1.1875E-05   | 132.81 |
| HIIEN(de)ATASVSEAR                           | 1625.8009 | IPI0039684C | IPI0039684C | yes | no  | 2,3   | 1.0413E-11   | 157.74 |
| HIIEN(de)ATASVSEARERK                        | 1753.8959 | IPI0039684C | IPI0039684C | yes | no  | 2,3   | 2.6277E-25   | 182.02 |
| HIN(de)ASNPSEPATIIFTAAR                      | 2009.033  | IPI00421157 | IPI00421157 | yes | yes | 2,3   | 1.2113E-13   | 150.69 |
| HIN(de)ITTSVAGGFR                            | 1484.81   | IPI00850413 | IPI00850413 | yes | yes | 2,3   | 0.0082814    | 82.925 |
| HIN(de)SSIPRPQPAIIITAAQDAAEVIK               | 2865.6076 | IPI00762273 | IPI00762273 | yes | no  | 3,4   | 2.9675E-23   | 148.95 |
| HISFGEDYPGIVNPIDHTN(de)VTAPQASMMFQYFVK       | 3852.828  | IPI00626559 | IPI00626559 | yes | no  | 3,4   | 2.6243E-12   | 112.26 |
| HITDISISGTIFVPQNSGIPKN(de)K                  | 2465.3278 | IPI0046760C | IPI0046760C | yes | yes |       | 3 4.5173E-05 | 100.39 |
| HIVFWN(de)SSNPK                              | 1327.6673 | IPI00130752 | IPI00130752 | yes | no  |       | 2 0.0004371  | 118.9  |
| HIVN(de)ISYAFNK                              | 1417.7718 | IPI00626793 | IPI00626793 | yes | no  |       | 2 0.0021797  | 107.09 |
| HIVNISYAFN(de)K                              | 1417.7718 | IPI00626793 | IPI00626793 | yes | no  |       | 2 0.0021797  | 107.09 |
| HIWSIEISNKPN(de)ISEPEEPK                     | 2346.1856 | IPI00130573 | IPI00130573 | yes | yes |       | 3 0.000141   | 101.05 |
| HN(de)ITITQK                                 | 1010.5509 | IPI00128359 | IPI00128359 | yes | no  |       | 2 0.04533    | 80.706 |
| HNN(de)DTQHIWESDSNEFSVIADPR                  | 2710.2008 | IPI00129529 | IPI00129529 | yes | no  | 2,3,4 | 1.5899E-81   | 207.22 |
| HPAN(de)ECAPYQFR                             | 1488.6568 | IPI00221859 | IPI00221859 | yes | yes |       | 2 0.014006   | 81.709 |
| HPGN(de)FSSISCDYFAVNQSR                      | 2184.9647 | IPI00115979 | IPI00115979 | yes | yes | 2,3   | 4.3662E-06   | 128.79 |
| HPGNFSSISCDYFAVN(de)QSR                      | 2184.9647 | IPI00115979 | IPI00115979 | yes | yes | 2,3   | 4.3662E-06   | 128.79 |
| HSIEHFNN(de)NTDHSIFTIR                       | 2318.0941 | IPI00114959 | IPI00114959 | yes | no  | 2,3,4 | 2.0326E-42   | 197.15 |
| HSQQPIITYEKYN(de)VTDTPK                      | 2261.1328 | IPI00322419 | IPI00322419 | yes | yes | 3,4   | 0.0037555    | 85.563 |
| HSVIWNAMIHPIQN(de)MTIK                       | 2132.1023 | IPI00111794 | IPI00111794 | yes | no  | 2,3   | 9.8228E-05   | 113.01 |
| HSVN(de)NTYSQFQDEYSIEEVMK                    | 2547.1224 | IPI00134131 | IPI00134131 | yes | no  |       | 3 3.6179E-30 | 170.53 |
| HSVPVFCFPSFYN(de)DTDFIGEEIDIVDK              | 3278.523  | IPI00416289 | IPI00416289 | yes | yes | 3,4   | 0.0001413    | 80.683 |
| HTDDITSIN(de)NTIVNIR                         | 1824.933  | IPI00129304 | IPI00129304 | yes | yes |       | 2 0.0007478  | 106.36 |
| HTGPGIISMANAGPNTN(de)GSQFFICTAK              | 2790.3218 | IPI00554989 | IPI00554989 | yes | yes |       | 3 8.2967E-60 | 196.02 |
| HTIEIAPN(de)STAR                             | 1308.6786 | IPI0062080C | IPI0062080C | yes | no  |       | 2 0.0057994  | 92.295 |
| HVCPVEN(de)WSYNESCSPDPAEQGGPK                | 2843.1915 | IPI00128269 | IPI00128269 | yes | yes |       | 3 2.3243E-56 | 189.82 |
| HVCPVENWSYN(de)ESCSPDPAEQGGPK                | 2843.1915 | IPI00128269 | IPI00128269 | yes | yes |       | 3 2.3243E-56 | 189.82 |
| HVEDKFN(de)ETTQR                             | 1502.7114 | IPI00130654 | IPI00130654 | yes | no  | 2,3   | 1.4981E-14   | 171.32 |
| HVGPGVISMAGPNTN(de)GSQFFICTIK                | 2816.3738 | IPI00116229 | IPI00116229 | yes | yes |       | 3 3.3798E-14 | 124.81 |
| HVTDMN(de)STIHIR                             | 1535.7878 | IPI00223449 | IPI00223449 | yes | yes |       | 3 0.0002346  | 138.63 |
| HVVIN(de)GSSFGADGFPYVQVIK                    | 2233.1532 | IPI00742377 | IPI00742377 | yes | no  | 2,3   | 1.3843E-05   | 100.97 |
| HYAN(de)ITNGMYR                              | 1338.6139 | IPI00224073 | IPI00224073 | yes | no  |       | 2 0.0033924  | 99.215 |
| I(de)AVISGCKNTTSAAMVHCIR                     | 2188.0915 | IPI00131219 | IPI00131219 | yes | yes | 2,3,4 | 3.2131E-25   | 168.05 |
| I(de)NHCKFDEFFSQGCAPGYEKNSTICIGPIK           | 3904.7681 | IPI00139789 | IPI00139789 | yes | no  |       | 4 2.0546E-29 | 141.36 |
| IACIN(de)GTVIR                               | 1115.6121 | IPI00134809 | IPI00134809 | yes | no  |       | 2 0.0024075  | 109.42 |
| IAGGENN(de)CSGRVEIK                          | 1602.7784 | IPI00760109 | IPI00760109 | yes | no  |       | 2 0.0097614  | 89.624 |
| IAGIAVTIAKPN(de)STSSFSVQCPNDGFIYSNSYGPEFAHCK | 4575.1475 | IPI00118674 | IPI00118674 | yes | yes |       | 5 0.0026354  | 48.65  |
| IAISFPN(de)ITSDGYPIYPTGWSSSDNVNCRPR          | 3582.7202 | IPI00466371 | IPI01026704 | no  | no  | 3,4,5 | 7.7968E-30   | 144.48 |
| IAITPAHIIIFIADN(de)HTEPAAHFR                 | 2554.3445 | IPI00230324 | IPI00230324 | yes | no  |       | 4 6.1147E-06 | 103.88 |
| IAMCQNIGYN(de)VTK                            | 1510.7272 | IPI00117094 | IPI00117094 | yes | yes |       | 2 0.0006415  | 114.56 |
| IAN(de)CTISDTIQEVNIEVQK                      | 2174.0889 | IPI00120351 | IPI00120351 | yes | yes |       | 3 1.0358E-06 | 133.78 |
| IAN(de)ETGGHSGPR                             | 1251.5956 | IPI0030923C | IPI0030923C | yes | no  | 2,3   | 0.0004417    | 132.79 |
| IAN(de)FSQSCTIYSGDDIVEAIPKPCPGCPR            | 3251.505  | IPI00114959 | IPI00114959 | yes | no  | 3,4   | 7.515E-172   | 261.54 |
| IAPASN(de)VSHTVVIR                           | 1462.8256 | IPI0046718C | IPI0046718C | yes | yes | 2,3   | 0.0021906    | 102.5  |
| IAPASN(de)VSHTVVIRPIK                        | 1801.0574 | IPI0046718C | IPI0046718C | yes | yes | 2,3,4 | 4.365E-88    | 230.82 |
| IAQEGGAAAIIAN(de)NSVIIPSSR                   | 2264.2488 | IPI00121779 | IPI00121779 | yes | yes | 2,3,4 | 1.6278E-09   | 129.78 |
| IATIAN(de)FSEIGIEPGR                         | 1686.8941 | IPI00129041 | IPI00129041 | yes | no  |       | 2 0.001092   | 103.87 |
| IATITCHIIPSDVSQVN(de)VSIIIWKPTFIK            | 3292.8257 | IPI00466371 | IPI01026704 | no  | no  |       | 4 0.01234    | 55.051 |
| IAVDWESIGYNI(de)TR                           | 1635.8257 | IPI0012304C | IPI0012304C | yes | no  |       | 3 9.8699E-11 | 158.11 |
| IAVTN(de)TTMTGTVIK                           | 1448.7909 | IPI00108041 | IPI00108041 | yes | yes |       | 2 2.966E-05  | 139.66 |
| IAYSNN(de)GSDWK                              | 1253.5677 | IPI00123999 | IPI00123999 | yes | yes |       | 2 0.001056   | 108.9  |
| ICEGDRFCIIDVMSTGSSVGN(de)ATR                 | 2731.2364 | IPI00749659 | IPI00749659 | yes | no  |       | 3 1.0277E-34 | 169.9  |
| ICHTHGWN(de)ETSEIMPPGAVFSCIYR                | 2961.336  | IPI00122399 | IPI00122399 | yes | no  |       | 3 3.9633E-12 | 116.45 |
| ICIHQIN(de)ETVTVTASIVSQGR                    | 2688.3905 | IPI00123223 | IPI00123223 | yes | yes |       | 3 0.0028205  | 69.779 |
| ICKPESGECINCIHN(de)TTGFWCEK                  | 2839.2186 | IPI00221701 | IPI00221701 | yes | yes |       | 3 4.9362E-08 | 121.21 |
| ICN(de)ECSDGSFHISK                           | 1652.6923 | IPI0051536C | IPI0051536C | yes | no  | 2,3   | 7.8087E-05   | 131.35 |
| ICQN(de)ISKK                                 | 989.5328  | IPI00126184 | IPI00126184 | yes | yes |       | 2 0.0008068  | 144.12 |
| ID(de)IPVNTSIPNVTEIKENMTFGSTIVTNP            | 3271.701  | IPI00466371 | IPI01026704 | no  | no  | 3,4   | 1.8626E-35   | 118.52 |
| IDAPTNIQFVN(de)ETDR                          | 1731.8428 | IPI00975193 | IPI00975193 | yes | no  | 2,3   | 2.0949E-24   | 181.51 |
| IDAPTNIQFVN(de)ETDRTVIVTWTPPR                | 2882.4927 | IPI00975193 | IPI00975193 | yes | no  |       | 3 1.0193E-15 | 138.04 |
| IDAYNEAAVSIIN(de)SSTR                        | 1822.9061 | IPI00380299 | IPI00380299 | yes | yes | 2,3   | 0.0005193    | 103.1  |
| IDCYPDEHGASEAN(de)CSAR                       | 2050.8109 | IPI00848693 | IPI00848693 | yes | yes | 2,3   | 1.8457E-08   | 137.45 |
| IDETDCIGN(de)WTWQEGSQQTIK                    | 2508.1227 | IPI00122973 | IPI00122973 | yes | no  |       | 3 1.7027E-40 | 188.04 |
| IDFIVINE(de)TR                               | 1218.6608 | IPI00125813 | IPI00125813 | yes | no  |       | 2 0.0003007  | 121.68 |
| IDGQWPDGIIASDNTIHFVHPITVN(de)YSGVYVCK        | 3714.8141 | IPI00471187 | IPI00471187 | yes | no  |       | 4 0.0054918  | 49.525 |
| IDIPVN(de)TSIPNVTEIK                         | 1751.9669 | IPI00466371 | IPI01026704 | no  | no  | 2,3   | 2.6378E-13   | 165.58 |
| IDIPVN(de)TSIPNVTEIKENMTFGSTIVTNP            | 3271.701  | IPI00466371 | IPI01026704 | no  | no  | 3,4   | 1.8626E-35   | 118.52 |
| IDIPVNTSIPN(de)VTEIK                         | 1751.9669 | IPI00466371 | IPI01026704 | no  | no  | 2,3   | 2.6378E-13   | 165.58 |
| IDIPVNTSIPN(de)VTEIKENMTFGSTIVTNP            | 3271.701  | IPI00466371 | IPI01026704 | no  | no  | 3,4   | 1.8626E-35   | 118.52 |

|                                               |           |             |             |     |     |       |   |             |        |
|-----------------------------------------------|-----------|-------------|-------------|-----|-----|-------|---|-------------|--------|
| IDITDFEKN(de)SSFAQYQSFK                       | 2267.0746 | IPI00121312 | IPI00121312 | yes | yes |       | 2 | 9.9954E-79  | 223.36 |
| IDKADGN(de)ITIEGASFVDGDNAATNGVVHIINK          | 3267.6371 | IPI0046760C | IPI0046760C | yes | no  |       | 4 | 0.0035537   | 59.282 |
| IDKADGNITIEGASFVDGDNAATNGVVHIIN(de)K          | 3267.6371 | IPI0046760C | IPI0046760C | yes | no  |       | 4 | 0.0035537   | 59.282 |
| IDKGGITINAN(de)ISGDAFIK                       | 1946.0473 | IPI0013458E | IPI0013458E | yes | no  | 2,3   |   | 8.2447E-05  | 119.46 |
| IDPPCTN(de)TTAPSNYINNPYVR                     | 2406.1274 | IPI0065853E | IPI0065853E | yes | no  | 2,3   |   | 1.5748E-22  | 161.08 |
| IDRNPSPEIPQVGN(de)ISIK                        | 2091.096  | IPI0030899C | IPI0030899C | yes | yes |       | 3 | 7.8999E-05  | 119.8  |
| IDSFN(de)DSTFMIVYTPITPTQR                     | 2546.2363 | IPI0032257E | IPI0032257E | yes | no  |       | 3 | 7.0987E-06  | 103.41 |
| IDSTGN(de)VTNEIR                              | 1317.6525 | IPI0022475E | IPI0022475E | yes | yes |       | 2 | 0.014195    | 81.565 |
| IDWIGN(de)CSGINDDSYGYR                        | 2103.8956 | IPI0012155C | IPI0012155C | yes | yes |       | 2 | 3.5476E-48  | 200.39 |
| IEAVIPAEFFEVISSSQN(de)GSYHHIR                 | 2829.4086 | IPI0034215E | IPI0034215E | yes | no  | 3,4   |   | 1.2746E-35  | 175.33 |
| IEAYFSIEGFPAEQN(de)ASNR                       | 2142.0018 | IPI0011431E | IPI0011431E | yes | yes | 2,3   |   | 1.3699E-52  | 201.37 |
| IEDGFHPDAVAWAN(de)ITNAIR                      | 2209.0916 | IPI0016573C | IPI0016573C | yes | no  | 2,3   |   | 2.3073E-14  | 155.79 |
| IEDRFN(de)STIGPSEEQEK                         | 1977.928  | IPI0011551E | IPI0011551E | yes | no  | 2,3   |   | 4.2494E-08  | 144.73 |
| IEDRFN(de)STIGPSEEQEKNWPGGPR                  | 2799.3212 | IPI0011551E | IPI0011551E | yes | no  | 3,4   |   | 1.1645E-11  | 118.05 |
| IEGITN(de)ETZR                                | 1194.5881 | IPI0011929E | IPI0011929E | yes | no  |       | 2 | 0.0012296   | 113.38 |
| IEGVTMFAMGIEGAN(de)NTQIEDIVSYPSR              | 3041.4474 | IPI0099093E | IPI0099093E | yes | no  | 3,4   |   | 0.0001632   | 75.71  |
| IEIVPIYDN(de)DSIFVQTDK                        | 2221.1518 | IPI0040554E | IPI0040554E | yes | yes | 2,3   |   | 1.5095E-52  | 200.58 |
| IEKIEGIIAN(de)VSR                             | 1440.83   | IPI0011551E | IPI0011551E | yes | no  | 2,3   |   | 0.0010377   | 135.02 |
| IEN(de)ISSTESGYTATITR                         | 1841.9007 | IPI0011196C | IPI0011196C | yes | no  | 2,3   |   | 1.2653E-21C | 300.97 |
| IEN(de)ITGTGTYTHAQQ                           | 1688.8733 | IPI0022242E | IPI0022242E | yes | yes | 2,3   |   | 1.5764E-24  | 183.23 |
| IEN(de)NCTHGEDTWMECEDPFEIK                    | 2753.1044 | IPI0031604E | IPI0031604E | yes | yes |       | 3 | 2.2777E-39  | 178.71 |
| IENN(de)CTHGEDTWMECEDPFEIK                    | 2753.1044 | IPI0031604E | IPI0031604E | yes | yes |       | 3 | 2.2777E-39  | 178.71 |
| IEPEHIQIQN(de)ISQEIAQVATIATK                  | 2801.4923 | IPI00165807 | IPI00165807 | yes | no  |       | 3 | 1.2731E-56  | 193.87 |
| IETIIN(de)GTDRK                               | 1371.7722 | IPI0011906E | IPI0011906E | yes | no  |       | 2 | 0.0015902   | 113.99 |
| IFFVNP(de)APPYIWPAAHKNEIMINSSIMR              | 3184.6354 | IPI0037869E | IPI0037869E | yes | no  |       | 4 | 0.0001918   | 88.755 |
| IFIFN(de)QTGIEAK                              | 1379.7449 | IPI00378224 | IPI00378224 | yes | yes |       | 2 | 3.7853E-15  | 173.19 |
| IFIFN(de)QTGIEAKK                             | 1507.8399 | IPI00378224 | IPI00378224 | yes | yes |       | 3 | 0.001135    | 120.57 |
| IFIGN(de)YSGNVGK                              | 1267.6561 | IPI0015341E | IPI0015341E | yes | yes |       | 2 | 0.0054575   | 93.011 |
| IFIYSGEPIYIGN(de)ETSIFGPK                     | 2344.1991 | IPI00750091 | IPI00750091 | yes | yes |       | 3 | 1.5728E-08  | 126.07 |
| IFNKFAVESIVPSSISIMHSPP(de)DAQNMSEVSISPMEISTFR | 4522.2222 | IPI00114044 | IPI00114044 | yes | yes |       | 5 | 0.025116    | 39.144 |
| IFTPVSSVFN(de)ITWSEISAIEIK                    | 2543.3887 | IPI0065272E | IPI0065272E | yes | no  |       | 3 | 0.0006069   | 85.248 |
| IGAGSGPIWIDDACNGN(de)ESAIWDCK                 | 2818.2691 | IPI0076010E | IPI0076010E | yes | no  |       | 3 | 3.2576E-35  | 169.19 |
| IGAIN(de)STISNESK                             | 1332.6885 | IPI0018735E | IPI0018735E | yes | yes |       | 2 | 0.032503    | 74.789 |
| IGAIN(de)STISNESKEAFIDWAR                     | 2321.1652 | IPI0018735E | IPI0018735E | yes | yes |       | 3 | 5.269E-07   | 117.2  |
| IGAINN(de)SIIIEDR                             | 1539.8621 | IPI0011551E | IPI0011551E | yes | no  | 2,3   |   | 4.3453E-07  | 147.7  |
| IGAINN(de)SIIIEDRIQQISIK                      | 2350.3584 | IPI0011551E | IPI0011551E | yes | no  |       | 3 | 0.053594    | 62.203 |
| IGAINSTISN(de)ESK                             | 1332.6885 | IPI0018735E | IPI0018735E | yes | yes |       | 2 | 0.032503    | 74.789 |
| IGAINSTISN(de)ESKEAFIDWAR                     | 2321.1652 | IPI0018735E | IPI0018735E | yes | yes |       | 3 | 5.269E-07   | 117.2  |
| IGGWN(de)ITGPWAK                              | 1298.6772 | IPI0039684C | IPI0039684C | yes | no  |       | 2 | 0.0083718   | 86.911 |
| IGHTN(de)ASIMIFEVK                            | 1558.8177 | IPI0085815E | IPI0085815E | yes | yes |       | 3 | 0.0001558   | 119.39 |
| IGISFNSITVMEN(de)GSIANVPHIR                   | 2468.2846 | IPI0012319E | IPI0012319E | yes | yes | 2,3,4 |   | 1.4677E-72  | 214.55 |
| IGN(de)FSEIATHNQTFIK                          | 1818.9264 | IPI0085510E | IPI0085510E | yes | no  |       | 2 | 2.9067E-18  | 171.71 |
| IGN(de)FTIAYSAPKETADNQR                       | 2095.0334 | IPI0022919E | IPI0022919E | yes | no  | 2,3   |   | 1.3913E-05  | 126.25 |
| IGN(de)VTTWISSSNPPVTFAAIYWEEDVSGHK            | 3401.6568 | IPI0022507E | IPI0022507E | yes | no  | 3,4   |   | 6.4678E-16  | 117.94 |
| IGN(de)WTGEWPETEIVANIWMK                      | 2373.1464 | IPI00322497 | IPI00322497 | yes | yes | 2,3,4 |   | 1.3618E-94  | 237.73 |
| IGNFSEIATHN(de)QTFIK                          | 1818.9264 | IPI0085510E | IPI0085510E | yes | no  |       | 2 | 2.9067E-18  | 171.71 |
| IGPGEPIEIIICN(de)VSGAIPPPGR                   | 2242.178  | IPI0032134E | IPI0032134E | yes | no  | 2,3,4 |   | 1.3882E-22  | 158.17 |
| IGTNRSPSVIQEIN(de)VTVVNTMCR                   | 2684.3738 | IPI0012230E | IPI0012230E | yes | yes |       | 3 | 0.0005373   | 91.583 |
| IGVQMHPGQEIHN(de)FTITGR                       | 2134.0742 | IPI0011929E | IPI0011929E | yes | no  | 2,3,4 |   | 3.5981E-09  | 140.32 |
| IGVTN(de)ASIVIFRPGSVR                         | 1785.0261 | IPI0065267E | IPI0065267E | yes | yes | 2,3   |   | 0.0005286   | 120.77 |
| IGYDPYANPPNYGNPDPIVIN(de)NTHR                 | 2810.3412 | IPI0031643C | IPI0031643C | yes | no  | 3,4   |   | 1.6676E-22  | 137.72 |
| IHIGNYN(de)GTAGDAIR                           | 1570.7852 | IPI00310797 | IPI00310797 | yes | yes |       | 2 | 0.0012694   | 104.95 |
| IHIIPSMNPDGYEVAQAQGN(de)MSGYIVGR              | 3056.4848 | IPI0012826C | IPI0012826C | yes | yes |       | 3 | 4.409E-120  | 238.7  |
| IHKDN(de)TTCYEFK                              | 1554.7137 | IPI0011906E | IPI0011906E | yes | yes | 2,3   |   | 0.015264    | 93.345 |
| IHRIN(de)ASIADIQSK                            | 1564.8685 | IPI0011691E | IPI0011691E | yes | no  |       | 2 | 0.0036691   | 107.74 |
| IHVAQPEN(de)DSHVAIHK                          | 1769.9424 | IPI0085041E | IPI0085041E | yes | yes | 2,3   |   | 2.1767E-34  | 190.24 |
| IHYIYQNNFITEIPIESFQN(de)ATGIR                 | 3093.5924 | IPI0012229E | IPI0012229E | yes | yes | 3,4   |   | 9.7614E-81  | 214.35 |
| II(de)DIDSCIDRSNYSVIDITPVAAILPK               | 3000.5842 | IPI0022507E | IPI0022507E | yes | no  | 3,4   |   | 4.4637E-06  | 103.84 |
| IIASN(de)ITETMR                               | 1247.6544 | IPI0013260C | IPI0013260C | yes | no  |       | 2 | 0.00032     | 136.96 |
| IIASPNEENM(de)TEIISMR                         | 1946.9441 | IPI0032257E | IPI0032257E | yes | no  | 2,3   |   | 1.2005E-47  | 200.97 |
| IIDIPDGYPQISCIPKEEN(de)ATIATYPEFGVIDIK        | 3932.0169 | IPI00124221 | IPI00124221 | yes | no  | 3,4,5 |   | 2.0261E-05  | 70.15  |
| IIDQACGTDN(de)QTYASSCHIFATK                   | 2600.1635 | IPI00308484 | IPI00308484 | yes | yes |       | 3 | 4.8988E-31  | 168.78 |
| IIFFDSTN(de)ASEGAQPPGKPYPPYSIAK               | 2876.4232 | IPI0045943E | IPI0045943E | yes | yes | 3,4   |   | 1.3243E-38  | 177.32 |
| IIGGGDEDAIRPQMQQIIDFETAIAN(de)ITIPQEK         | 3623.8505 | IPI0039684C | IPI0039684C | yes | no  | 3,4   |   | 2.1103E-70  | 192.18 |
| IIGGGDEDAIRPQMQQIIDFETAIAN(de)ITIPQEK         | 3779.9516 | IPI0039684C | IPI0039684C | yes | no  |       | 4 | 0.017608    | 47.647 |
| IIGVPSIEDIDEVHNIIPDAIGVIFN(de)DSFSYQIK        | 3883.0295 | IPI0017014E | IPI0017014E | yes | no  | 3,4   |   | 7.0292E-20  | 119.8  |
| IIGGIPVSGTFHN(de)FSGCISNVFVQR                 | 2818.4589 | IPI0011691E | IPI0011691E | yes | no  | 3,4   |   | 2.6233E-10  | 116.21 |
| IIIN(de)FTSMDIYR                              | 1484.7697 | IPI0012518E | IPI0012518E | yes | no  |       | 2 | 0.0007915   | 123.64 |
| IIIN(de)WTQGQTSQVIR                           | 1684.9261 | IPI0067465E | IPI0067465E | yes | no  |       | 2 | 0.0001976   | 120.63 |
| IIISPEEN(de)VTITCTAENQUIER                    | 2429.2108 | IPI0012137E | IPI0012137E | yes | no  | 2,3   |   | 2.9277E-13  | 252.83 |
| IIISPSAFHDGN(de)FSIIIR                        | 1999.0891 | IPI0031051E | IPI0031051E | yes | no  |       | 3 | 6.9549E-06  | 129.93 |
| IIITAAPN(de)ITTSAPFR                          | 1684.9512 | IPI0031472E | IPI0031472E | yes | yes |       | 3 | 0.0052257   | 81.311 |
| IIITAAPN(de)ITTSAPFRYDIIDVTR                  | 2660.4538 | IPI0031472E | IPI0031472E | yes | yes |       | 3 | 0.0016297   | 85.146 |
| IIN(de)ASVIGDHTK                              | 1266.6932 | IPI0011605E | IPI0011605E | yes | yes |       | 3 | 0.017444    | 79.089 |
| IIN(de)ATHQIGCQSSISGDTGVIHVVEKEEDIK           | 3376.6933 | IPI00118674 | IPI00118674 | yes | yes | 4,5   |   | 6.3374E-11  | 109.68 |
| IIN(de)HSIIHK                                 | 1186.7186 | IPI0040660E | IPI0040660E | yes | yes | 2,3   |   | 3.2283E-11  | 167.12 |
| IIN(de)ITFIDITR                               | 1317.7656 | IPI0034356E | IPI0034356E | yes | no  |       | 2 | 0.0004106   | 117.79 |
| IIN(de)ITNPVINQEIEAFSPEDASSSR                 | 2890.4349 | IPI00221444 | IPI00221444 | yes | no  |       | 3 | 1.4088E-35  | 171.75 |
| IIN(de)QTADMIQIASK                            | 1544.8232 | IPI00126864 | IPI00126864 | yes | no  |       | 3 | 0.010327    | 80.746 |
| IIN(de)QTIR                                   | 856.51305 | IPI0046006E | IPI0046006E | yes | no  |       | 2 | 0.017481    | 101.64 |
| IIN(de)QTIRENIK                               | 1340.7776 | IPI0046006E | IPI0046006E | yes | no  |       | 2 | 1.6485E-09  | 163.12 |
| IIN(de)TTDVYIIPSINPDGFER                      | 2276.1689 | IPI0013057E | IPI0013057E | yes | yes | 2,3   |   | 1.0228E-09  | 142.99 |
| IINDYVSN(de)QTQGMK                            | 1722.8611 | IPI0013563E | IPI0013563E | yes | no  |       | 2 | 0.0017385   | 100.58 |
| IINKFN(de)SSSSSIEEK                           | 1681.8523 | IPI00338561 | IPI00338561 | yes | yes |       | 2 | 0.016228    | 87.566 |
| IIPAFN(de)TTSIGIPYPR                          | 1645.8828 | IPI0012767E | IPI0012767E | yes | no  |       | 3 | 0.017906    | 72.681 |
| IIPGGN(de)TSFDVVFAR                           | 1704.9199 | IPI0011833E | IPI0011833E | yes | yes |       | 3 | 0.0009187   | 102.28 |



|                                            |           |             |             |     |     |       |              |        |
|--------------------------------------------|-----------|-------------|-------------|-----|-----|-------|--------------|--------|
| IIPHIEKPIQN(de)FTICFR                      | 2125.1507 | IPI00309214 | IPI00309214 | yes | yes | 2,3,4 | 0.0008784    | 115.87 |
| IQQQSN(de)QSSQFIHSVER                      | 2128.0661 | IPI00876541 | IPI00876541 | yes | no  |       | 2 1.979E-48  | 204.23 |
| IQTAEHN(de)ISGAER                          | 1537.7849 | IPI0040393E | IPI0040393E | yes | no  | 2,3   | 1.7886E-13E  | 262.42 |
| IQVVYIHSNN(de)ITK                          | 1640.925  | IPI00123194 | IPI00123194 | yes | yes | 2,3   | 3.4828E-16   | 171.81 |
| IIRVDIPQQPMGIIAVAN(de)DTNSCEISPCR          | 3266.621  | IPI0011906E | IPI0011906E | yes | yes |       | 3 1.9387E-51 | 186.44 |
| IIRVDIPQQPMGIIAVAN(de)DTNSCEISPCR          | 3266.621  | IPI0011906E | IPI0011906E | yes | yes |       | 3 1.9387E-51 | 186.44 |
| IISQAPSTPSPNMFTINN(de)ETGDIITVAAGIDR       | 3342.6766 | IPI00323134 | IPI00323134 | yes | no  | 3,4   | 2.1395E-07   | 90.616 |
| IISQAPSTPSPNMFTINN(de)ETGDIITVAAGIDREK     | 3599.8141 | IPI00323134 | IPI00323134 | yes | no  | 3,4,5 | 9.5466E-23   | 131.62 |
| IISYN(de)VSCSINEETQSVIEIFDPQHR             | 3077.4764 | IPI0011929E | IPI0011929E | yes | no  |       | 3 1.0828E-13 | 129.43 |
| IITHTIEGPSQN(de)VTHIQPWQDPESWER            | 3414.7208 | IPI0047319C | IPI0047319C | yes | no  | 3,4   | 2.9488E-09   | 108.44 |
| IITN(de)NSQTPPIISPQEVVSCSPYAQGCDGGFPYIIAGK | 3980.9288 | IPI0013001E | IPI0013001E | yes | yes |       | 4 1.3871E-26 | 131.68 |
| IYY(de)EGGDIPDFRKENSYSYQVINWR              | 2898.4301 | IPI0015331E | IPI0015331E | yes | yes | 3,4   | 0.010946     | 87.654 |
| IYFGYSIIGAHPiin(de)QTVNR                   | 2388.2954 | IPI0022181E | IPI0022181E | yes | yes |       | 3 0.0040205  | 73.928 |
| IYGIEN(de)TTQEIK                           | 1520.8086 | IPI0030999E | IPI0030999E | no  | no  |       | 2 0.0004353  | 132.97 |
| IYIN(de)VSNNIIQIPAGIPR                     | 2107.2154 | IPI00884541 | IPI00884541 | yes | yes |       | 3 3.3853E-09 | 140.96 |
| IYISAEDFSIDHSPN(de)STAGPSCSIIQEAFR         | 3424.6245 | IPI0011553C | IPI0011553C | yes | yes | 3,4   | 6.014E-49    | 170.59 |
| IYISAEDFSIDHSPN(de)STAGPSCSIIQEAFR         | 3580.7256 | IPI0011553C | IPI0011553C | yes | yes | 3,4   | 6.6853E-06   | 80.132 |
| IK(de)FIEAGIYEVPIITDSGNPPKSNISIIR          | 3296.8384 | IPI00323134 | IPI00323134 | yes | no  | 3,4,5 | 1.271E-22    | 143.91 |
| IKEQVVGIIAQN(de)NCSCESK                    | 2176.0616 | IPI0012259E | IPI0012259E | yes | yes |       | 3 1.9753E-41 | 195.46 |
| IKEQVVGIIAQNN(de)CSCESK                    | 2176.0616 | IPI0012259E | IPI0012259E | yes | yes |       | 3 1.9753E-41 | 195.46 |
| IKGEAEYQEIRNPN(de)GTVTVISR                 | 2473.2925 | IPI0031140E | IPI0031140E | yes | yes | 3,4   | 0.0009807    | 90.718 |
| IKIDN(de)YSTQEIGR                          | 1535.7944 | IPI00122257 | IPI00122257 | yes | no  | 2,3   | 9.7217E-22   | 179.67 |
| IKN(de)ATVTQYQIK                           | 1405.7929 | IPI00221547 | IPI00221547 | yes | no  | 2,3   | 0.0009637    | 138.99 |
| IKN(de)TTNQIAIK                            | 1355.8136 | IPI0098598E | IPI0098598E | yes | no  | 2,3   | 0.0002399    | 145.31 |
| IKVSEGDYSIYMSN(de)ITK                      | 1946.9659 | IPI0012964E | IPI0012964E | yes | no  |       | 3 2.1584E-05 | 134.25 |
| IKVSN(de)VSCEASVSK                         | 1506.7712 | IPI0013556C | IPI0013556C | yes | no  |       | 3 0.0048711  | 105.03 |
| IMESHPN(de)GTFSAK                          | 1417.666  | IPI0046805E | IPI0046805E | yes | no  | 2,3   | 0.0001135    | 143.31 |
| IMNAPIYIAEWQN(de)ITK                       | 1903.9866 | IPI0093088E | IPI0093088E | yes | no  |       | 3 4.214E-07  | 139.58 |
| IMQDPIQQAEGIYCN(de)R                       | 1934.8979 | IPI0031454E | IPI0031454E | yes | yes | 2,3   | 2.9722E-09   | 150.05 |
| IN(de)ETHIFNGSNWIMIIYK                     | 2192.1088 | IPI00108844 | IPI00108844 | yes | yes | 2,3   | 1.2068E-21   | 174.59 |
| IN(de)GTDPIVAADSK                          | 1299.667  | IPI0011906E | IPI0011906E | yes | yes |       | 2 0.0070781  | 85.909 |
| IN(de)GTDPIVAADSKR                         | 1455.7682 | IPI0011906E | IPI0011906E | yes | yes | 2,3   | 0.0084744    | 92.039 |
| IN(de)HCKFDEFFSQGCAPGYEKNSTICDICIGPIK      | 3904.7681 | IPI0013978E | IPI0013978E | yes | no  |       | 4 2.0546E-29 | 141.36 |
| IN(de)ISEGEVAATVK                          | 1329.714  | IPI0045800E | IPI0045800E | yes | yes |       | 2 3.885E-05  | 146    |
| IN(de)ITAAQISQIEGIIQAR                     | 1938.0898 | IPI0011551E | IPI0011551E | yes | no  | 2,3   | 6.704E-107   | 165.3  |
| IN(de)ITEEEKIINR                           | 1470.8042 | IPI00320204 | IPI00320204 | yes | yes |       | 2 3.5706E-08 | 157.56 |
| IN(de)ITEEEKIINRR                          | 1626.9053 | IPI00320204 | IPI00320204 | yes | yes |       | 2 0.002835   | 112.51 |
| IN(de)KTVAIHTIDPEK                         | 1577.8777 | IPI00323624 | IPI00323624 | yes | no  |       | 2 0.0026475  | 110.55 |
| IN(de)KTVAIHTIDPEKIGQGGVQK                 | 2345.3067 | IPI00323624 | IPI00323624 | yes | no  |       | 3 0.052232   | 61.767 |
| IN(de)MTIPDAIVPTFSISNHSIK                  | 2297.209  | IPI0046921E | IPI0046921E | yes | yes | 2,3,4 | 4.2671E-48   | 189.55 |
| IN(de)TTSDEKPTNPFR                         | 1733.822  | IPI00131881 | IPI00131881 | yes | no  | 2,3   | 0.002569     | 109.07 |
| IN(de)TTSDEKPTNPFRFPNIGVEK                 | 2618.2976 | IPI00131881 | IPI00131881 | yes | no  |       | 3 0.0015938  | 87.352 |
| IN(de)VSYTGERPSSNMVIVDVK                   | 2207.1256 | IPI0062466E | IPI0062466E | yes | yes | 2,3   | 0.0040801    | 83.758 |
| IN(de)VTEYVDKIK                            | 1320.7289 | IPI0022507E | IPI0022507E | yes | no  |       | 3 0.0015193  | 122.7  |
| IN(de)YTIVGEPIR                            | 1273.703  | IPI00120674 | IPI00120674 | yes | no  |       | 2 0.0004494  | 132.79 |
| INETHIFN(de)GSNWIMIIYK                     | 2192.1088 | IPI00108844 | IPI00108844 | yes | yes | 2,3   | 1.2068E-21   | 174.59 |
| INIDGSN(de)YTIK                            | 1349.7191 | IPI0011906E | IPI0011906E | yes | yes |       | 2 0.011616   | 83.53  |
| INMTIPDAIVPTFSISN(de)HSIK                  | 2297.209  | IPI0046921E | IPI0046921E | yes | yes | 2,3,4 | 4.2671E-48   | 189.55 |
| INN(de)ITNIGPIDMK                          | 1441.7599 | IPI0033068C | IPI0033068C | yes | no  | 2,3   | 0.0005987    | 114.74 |
| INNGGCQDICIITHQGHVN(de)CSCR                | 2712.1737 | IPI0011906E | IPI0011906E | yes | yes |       | 3 1.1702E-07 | 106.49 |
| INSAPVEGYSEHVGN(de)K                       | 1699.8166 | IPI0034983C | IPI0034983C | yes | no  | 2,3   | 3.1075E-13   | 163.41 |
| IPEN(de)QTIPGEIPEHAGPAEGVHDSR              | 2649.2783 | IPI00856221 | IPI00856221 | yes | yes |       | 3 0.0006721  | 79.69  |
| IPFNVIMNNVEDIIEQQTFN(de)DTVSPR             | 3032.4913 | IPI0031004E | IPI0031004E | yes | yes | 3,4   | 0.00117      | 71.052 |
| IPN(de)ISIDVIQPSFPEIIIESHMVMIR             | 2990.5973 | IPI0022166E | IPI0022166E | yes | no  |       | 3 0.0002123  | 85.248 |
| IPNNTQWITW(de)SPEGHK                       | 1906.9326 | IPI0012581E | IPI0012581E | yes | no  | 2,3   | 4.7183E-05   | 126.77 |
| IPQIHHYIN(de)ASDWER                        | 2005.9759 | IPI00666034 | IPI00666034 | yes | no  |       | 2 0.0007162  | 107.5  |
| IPSSIEN(de)ATSISIMNITGTAICHISDIPPDGIR      | 3492.7593 | IPI0012177E | IPI0012177E | yes | yes |       | 3 9.1324E-40 | 129.35 |
| IPSSIENATSISIMN(de)ITGTAICHISDIPPDGIR      | 3492.7593 | IPI0012177E | IPI0012177E | yes | yes |       | 3 9.1324E-40 | 129.35 |
| IPVAVIN(de)ATAK                            | 1095.6652 | IPI00122491 | IPI00122491 | yes | yes |       | 2 0.009307   | 88.187 |
| IPYQGN(de)ATMIVVIMEK                       | 1805.942  | IPI0015325E | IPI0015325E | yes | yes | 2,3   | 5.3412E-10   | 155.98 |
| IQCVDGN(de)WTTIPVCIEEER                    | 2318.0671 | IPI0013001C | IPI0013001C | yes | no  |       | 2 2.8156E-65 | 214.59 |
| IQCVDGN(de)WTTIPVCIEEERTCGDIPEIEHGSAK      | 3812.7444 | IPI0013001C | IPI0013001C | yes | no  |       | 4 7.7114E-05 | 69.952 |
| IQDFIVDN(de)ETFSGFIQHNISIPR                | 2689.35   | IPI00112614 | IPI00112614 | yes | yes | 3,4   | 6.1992E-24   | 167.24 |
| IQDFIVDNETFSGFIQHN(de)ISIPR                | 2689.35   | IPI00112614 | IPI00112614 | yes | yes | 3,4   | 6.1992E-24   | 167.24 |
| IQDIEITGSPVSN(de)ISAHIFSNISIEK             | 2898.4975 | IPI0011952E | IPI0011952E | yes | yes | 2,3,4 | 4.8906E-30   | 159.76 |
| IQDIEITGSPVSNISAHIFSN(de)ISSIEK            | 2898.4975 | IPI0011952E | IPI0011952E | yes | yes | 2,3,4 | 4.8906E-30   | 159.76 |
| IQFDDN(de)GTYTCQVK                         | 1687.7512 | IPI0011647E | IPI0011647E | yes | no  |       | 2 0.0010697  | 109.35 |
| IQIEFRPIDIN(de)STAAGIPR                    | 2110.1535 | IPI0011551C | IPI0011551C | yes | yes | 2,3   | 8.7668E-09   | 141.6  |
| IQNIIEKPSVTTVYINN(de)GSVIQSSVATIYDRK       | 3693.9578 | IPI00310567 | IPI00310567 | yes | yes |       | 4 0.0022124  | 55.587 |
| IQQEFHCCGSN(de)NSQDWQDSEWIR                | 2923.2038 | IPI0026642E | IPI0026642E | yes | yes |       | 3 0.0016243  | 76.015 |
| IQSPIFIIDANANIQN(de)VTTSGNK                | 2457.2864 | IPI00666034 | IPI00666034 | yes | no  |       | 3 2.6959E-17 | 154.84 |
| IQSPIFIIDANANIQN(de)VTTSGNKAIEIVASVTAK     | 3426.8358 | IPI00666034 | IPI00666034 | yes | no  |       | 4 7.558E-16  | 119.37 |
| IQTPIN(de)YTEFQKPICIPSK                    | 2276.1875 | IPI00113057 | IPI00113057 | yes | yes | 2,3,4 | 1.9449E-13   | 153.74 |
| IQVTIYN(de)CSFGR                           | 1456.7133 | IPI0040574E | IPI0040574E | yes | no  |       | 2 0.0001583  | 143.42 |
| IRAEQITIHAIGIGEAN(de)KTQIR                 | 2431.3659 | IPI0099093E | IPI0099093E | yes | no  |       | 3 5.3143E-05 | 100.21 |
| IRDYEEN(de)SSSCHKEVQIIK                    | 2334.1274 | IPI00330594 | IPI00330594 | yes | yes |       | 3 0.0001094  | 118.21 |
| IRN(de)ATITQAITNK                          | 1442.8205 | IPI0087602E | IPI0087602E | yes | yes |       | 3 0.01562    | 90.793 |
| IRN(de)SSIGGVINK                           | 1256.7201 | IPI0031467E | IPI0031467E | yes | yes | 2,3   | 0.000456     | 143.42 |
| IRN(de)SSIGGVINKYDVVIR                     | 2002.1324 | IPI0031467E | IPI0031467E | yes | yes |       | 3 5.0377E-05 | 126.16 |
| IRNPCTSE(de)QNCTSPFSYK                     | 2187.9677 | IPI00132474 | IPI00132474 | yes | yes | 2,3   | 3.2634E-37   | 193.8  |
| IRPHFISVCDPDFSQIN(de)CSEGYIQNYR            | 3314.5237 | IPI0011562E | IPI0011562E | yes | yes | 3,4   | 8.3463E-11E  | 234.36 |
| IRPIFN(de)K                                | 886.53887 | IPI00108844 | IPI00108844 | yes | yes |       | 3 0.060546   | 100.07 |
| IRPIFN(de)KSFEVTVGQSDTYSYIFR               | 2911.4505 | IPI00108844 | IPI00108844 | yes | yes | 3,4   | 5.0341E-21   | 156.05 |
| IRVN(de)GTKEPIEFK                          | 1529.8566 | IPI0034511E | IPI0034511E | yes | no  | 2,3   | 0.0046252    | 106.67 |
| IS(de)HYKQNFSSFCR                          | 1585.746  | IPI0038130E | IPI0038130E | yes | yes |       | 2 0.0029559  | 110.92 |
| ISAIIDNIIN(de)HSSIFIK                      | 1783.9832 | IPI0012334E | IPI0012334E | yes | yes | 2,3   | 2.515E-119   | 252.47 |

|                                                 |           |             |             |     |     |       |              |        |
|-------------------------------------------------|-----------|-------------|-------------|-----|-----|-------|--------------|--------|
| ISASGAEIEAIEAQVIN(de)ISIK                       | 2155.1736 | IPI00312711 | IPI00312711 | yes | no  | 2,3   | 1.2564E-100  | 233.63 |
| ISCAFKTEN(de)QTR                                | 1453.6984 | IPI00120245 | IPI00120245 | yes | no  |       | 2 5.3225E-15 | 175.74 |
| ISDTN(de)ITAIPQGIPTSITEVHIDGNK                  | 2733.4185 | IPI00123196 | IPI00123196 | yes | yes |       | 3 1.3928E-22 | 157.3  |
| ISDTN(de)ITAIPQGIPTSITEVHIDGNKITK               | 3075.6452 | IPI00123196 | IPI00123196 | yes | yes | 3,4   | 1.8351E-05   | 95.123 |
| ISDTN(de)ITAIPQGIPTSITEVHIDGNKTKVDAPSIIK        | 3786.0415 | IPI00123196 | IPI00123196 | yes | yes |       | 4 0.0002326  | 63.203 |
| ISEEFIKN(de)ISASAR                              | 1563.8257 | IPI0089497C | IPI0089497C | yes | no  |       | 2 0.0003654  | 124.16 |
| ISEGN(de)RTITIINVTR                             | 1685.9424 | IPI00108535 | IPI00108535 | yes | no  |       | 2 0.0006223  | 107.35 |
| ISEGN(de)RTITIINVTRNDTGPYVCETR                  | 2978.488  | IPI00108535 | IPI00108535 | yes | no  | 3,4   | 0.0034858    | 76.049 |
| ISEGNR(de)TITIINVTR                             | 1685.9424 | IPI00108535 | IPI00108535 | yes | no  |       | 2 0.0006223  | 107.35 |
| ISEGNR(de)TITIINVTRNDTGPYVCETR                  | 2978.488  | IPI00108535 | IPI00108535 | yes | no  | 3,4   | 0.0034858    | 76.049 |
| ISEGNRTITI(de)INVTRNDTGPYVCETR                  | 2978.488  | IPI00108535 | IPI00108535 | yes | no  | 3,4   | 0.0034858    | 76.049 |
| ISEN(de)GSSVAGIISPMEK                           | 1918.9306 | IPI0039979E | IPI0039979E | yes | no  | 2,3   | 1.0578E-19   | 162.32 |
| ISFIIGSDSTHVIPGESPFN(de)K                       | 2244.1426 | IPI00123783 | IPI00123783 | yes | no  |       | 3 0.0093786  | 67.645 |
| ISGKPTN(de)VSVSVMSEGDGICY                       | 2312.1028 | IPI0047388C | IPI0047388C | yes | no  |       | 2 1.2385E-85 | 223.18 |
| ISGNSIHN(de)ASIPHEIAYGSVITVK                    | 2506.318  | IPI0022166E | IPI0022166E | yes | no  |       | 3 8.3948E-21 | 152.06 |
| ISHDGN(de)ETIPIHIYVK                            | 1834.9577 | IPI00405742 | IPI00405742 | yes | no  | 2,3,4 | 4.9188E-46   | 208.15 |
| ISHYN(de)DTYPISPQR                              | 1786.8638 | IPI0011303E | IPI0011303E | yes | no  | 2,3   | 9.8476E-12   | 158.29 |
| ISIN(de)ESMQVVS                                 | 1361.6973 | IPI00471022 | IPI00471022 | yes | yes |       | 2 0.0096606  | 84.753 |
| ISISEN(de)YTISIANAK                             | 1622.8516 | IPI0012137E | IPI0012137E | yes | no  | 2,3   | 1.2107E-56   | 216    |
| ISITN(de)ETFRK                                  | 1207.6561 | IPI00123652 | IPI00123652 | yes | no  |       | 2 0.0011586  | 115.57 |
| ISN(de)ITIIEMEKESAR                             | 1845.987  | IPI00356462 | IPI00356462 | yes | no  |       | 2 0.0005434  | 123.08 |
| ISN(de)VTPEDAGTYVCVK                            | 1815.8349 | IPI0012915E | IPI0012915E | yes | no  |       | 2 8.54E-06   | 135.23 |
| ISNISN(de)ISHDIVQEATDHAYNIQQADEISR              | 3509.6659 | IPI0022344E | IPI0022344E | yes | yes |       | 3 6.7833E-59 | 179.47 |
| ISPGGAEMFQVQDMVVSQEKGN(de)CSIQR                 | 2994.3998 | IPI00130117 | IPI00130117 | yes | no  |       | 4 9.5119E-06 | 100.19 |
| ISPIHAIIN(de)FSIDPK                             | 1663.9297 | IPI0011597E | IPI0011597E | yes | yes | 2,3   | 5.3454E-08   | 148.72 |
| ISQAIGN(de)ITVVQK                               | 1369.7929 | IPI00112032 | IPI00112032 | yes | no  | 2,3   | 4.8043E-15   | 167.89 |
| ISQKN(de)QTVFER                                 | 1348.7099 | IPI00130117 | IPI00130117 | yes | no  | 2,3   | 0.0043971    | 105.46 |
| ISQN(de)ASIGPHVRPIPIQYEDK                       | 2361.2441 | IPI0011694E | IPI0011694E | yes | no  |       | 3 0.040348   | 63.998 |
| ISQN(de)ASIGPHVRPIPIQYEDKEVEPGTICDVAGWGVVTHAGR  | 4552.2921 | IPI0011694E | IPI0011694E | yes | no  | 4,5   | 6.9592E-16   | 95.36  |
| ISSPN(de)VTISCK                                 | 1291.6442 | IPI0022571E | IPI0022571E | yes | no  |       | 2 0.0090198  | 85.554 |
| ISTNI(de)TIVCKPGDIESAPVIR                       | 2282.2304 | IPI00308971 | IPI00308971 | yes | yes |       | 2 7.7591E-59 | 202.22 |
| ISTSPFAINI(de)TMIPK                             | 1631.8957 | IPI00666034 | IPI00666034 | yes | no  | 2,3   | 1.3904E-33   | 194.98 |
| ISVPDGIKVSND(de)SSAR                            | 1528.8209 | IPI00120761 | IPI00120761 | yes | no  |       | 2 0.0002387  | 125.22 |
| ISWPSNVN(de)GSHR                                | 1352.6585 | IPI0012270E | IPI0012270E | yes | no  |       | 2 0.010779   | 84.169 |
| ITAN(de)STWQPDKAK                               | 1458.7467 | IPI0065367E | IPI0065367E | yes | no  |       | 2 0.0023345  | 129.77 |
| ITATDGENFATPIYIN(de)ITVAASR                     | 2437.2489 | IPI00623114 | IPI00623114 | yes | no  |       | 3 1.0804E-13 | 146.97 |
| ITCFNN(de)FSIAAPESPHPAHSQVSTGYSR                | 3260.5309 | IPI0012554E | IPI0012554E | yes | no  | 3,4   | 8.2463E-06   | 92.41  |
| ITDIEN(de)GTFANIPR                              | 1559.7944 | IPI00117957 | IPI00117957 | yes | yes |       | 2 7.071E-43  | 202.25 |
| ITDTICGVGN(de)MSANASDQER                        | 2137.9368 | IPI0011406E | IPI0011406E | yes | no  |       | 3 0.0078466  | 70.837 |
| ITDTICGVGNMSAN(de)ASDQER                        | 2137.9368 | IPI0011406E | IPI0011406E | yes | no  |       | 3 0.0078466  | 70.837 |
| ITEFTHN(de)STMDYK                               | 1585.7083 | IPI0013001C | IPI0013001C | yes | no  | 2,3   | 0.0005799    | 122.78 |
| ITFFNSTIN(de)TSGIVAQGEAIPGHRPGIVTK              | 3405.8409 | IPI00153317 | IPI00153317 | yes | yes | 3,4   | 3.0402E-16   | 125.52 |
| ITHIPDDIPSN(de)ITVINITHNQIR                     | 2623.4082 | IPI0032061E | IPI0032061E | yes | yes | 3,4   | 7.0493E-17   | 153.25 |
| ITHIPDDIPSNITVIN(de)ITHNQIR                     | 2623.4082 | IPI0032061E | IPI0032061E | yes | yes | 3,4   | 7.0493E-17   | 153.25 |
| ITIAIN(de)NTITPHTIPPPTIVYK                      | 2376.3417 | IPI0030923C | IPI0030923C | yes | no  | 2,3   | 1.4753E-134  | 254.26 |
| ITIEVDPVPKPSIEIN(de)KTEASTDSCHIR                | 3295.6758 | IPI0010994E | IPI0010994E | yes | yes |       | 4 0.0094503  | 58.938 |
| ITN(de)ISIAMSGVYVCK                             | 1654.8422 | IPI00126827 | IPI00126827 | yes | no  |       | 2 1.8169E-17 | 173.51 |
| ITN(de)QTIGFSFAVEQDIPVK                         | 2106.0997 | IPI00624663 | IPI00624663 | yes | yes | 2,3   | 8.87E-111    | 249.52 |
| ITN(de)QTIGFSFAVEQDIPVKNIKPAPIK                 | 2967.6433 | IPI00624663 | IPI00624663 | yes | yes |       | 4 0.037238   | 45.878 |
| ITN(de)VTFTGVTNIHGDMDK                          | 2158.0729 | IPI00123783 | IPI00123783 | yes | no  |       | 3 7.7876E-07 | 117.3  |
| ITPNCCN(de)TSTVADAYR                            | 1841.8036 | IPI0011122E | IPI0011122E | yes | yes |       | 2 0.0010308  | 99.663 |
| ITQN(de)ITDIIVNVSDSIEMR                         | 2160.1096 | IPI00273133 | IPI00273133 | yes | yes |       | 3 0.0011961  | 85.636 |
| ITQNITDIIVN(de)VSDSIEMR                         | 2160.1096 | IPI00273133 | IPI00273133 | yes | yes |       | 3 0.0011961  | 85.636 |
| ITSCATN(de)ASMCGDEAR                            | 1742.7022 | IPI00119063 | IPI00119063 | yes | yes | 2,3   | 4.4654E-45   | 200.33 |
| ITSFMIEN(de)GTSDCNIPENPIFISCDGR                 | 3086.3784 | IPI0022571E | IPI0022571E | yes | yes |       | 3 0.0002149  | 78.976 |
| ITSFMIEN(de)GTSDCNIPENPIFISCDGRNHTISGSK         | 3910.7924 | IPI0022571E | IPI0022571E | yes | yes |       | 4 4.9772E-08 | 80.067 |
| ITSFMIENGTSDCNIPENPIFISCDGRN(de)HTISGSK         | 3910.7924 | IPI0022571E | IPI0022571E | yes | yes |       | 4 4.9772E-08 | 80.067 |
| ITSN(de)ATSDINIK                                | 1275.667  | IPI00461493 | IPI00461493 | yes | no  |       | 2 0.0031372  | 99.531 |
| ITTTPTNGQQGTSIEVVHADQSSCTFENINPGIEYN(de)VSVYTVI | 4827.2821 | IPI00975193 | IPI00975193 | yes | no  | 4,5   | 4.0624E-08   | 68.916 |
| ITTTSPWMIPAPHVWPEDHVFISTPNFN(de)YTVQDFER        | 4272.0415 | IPI0013350C | IPI0013350C | yes | yes | 4,5   | 0.0001177    | 61.725 |
| ITVIDANDNAPAFN(de)QSIYR                         | 2121.0491 | IPI00129613 | IPI00129613 | yes | yes | 2,3   | 1.9518E-12E  | 259.64 |
| ITVPSSQN(de)SSFR                                | 1321.6626 | IPI0051536C | IPI0051536C | yes | no  |       | 2 0.015343   | 80.69  |
| ITVVYAEN(de)GTVIQGTTVASVYK                      | 2312.2264 | IPI0031735E | IPI0031735E | yes | yes | 2,3   | 4.3586E-25C  | 311.65 |
| ITYESGFN(de)YSK                                 | 1420.6874 | IPI00666034 | IPI00666034 | yes | no  |       | 2 1.553E-06  | 154.36 |
| ITYN(de)ESR                                     | 881.4243  | IPI01008227 | IPI01008227 | yes | no  |       | 2 0.023094   | 99.139 |
| IVAIAVIDEKN(de)TSIEHTR                          | 2008.0953 | IPI0045379E | IPI0045379E | yes | yes |       | 3 1.6498E-18 | 136.39 |
| IVAN(de)ISGCAAVNSETIMCCIR                       | 2338.0902 | IPI0022248E | IPI0022248E | yes | yes |       | 3 2.7468E-76 | 204.23 |
| IVCTQKKEN(de)ESR                                | 1490.7511 | IPI0031515E | IPI0031515E | yes | no  | 2,3   | 0.0043827    | 107.06 |
| IVDTN(de)KTR                                    | 945.52434 | IPI0087655E | IPI0087655E | yes | no  |       | 2 2.7257E-06 | 156.35 |
| IVDVN(de)ITSEGK                                 | 1173.6241 | IPI0011352E | IPI0011352E | yes | no  |       | 2 0.0019443  | 104.24 |
| IVDVN(de)ITSEGKVK                               | 1400.7875 | IPI0011352E | IPI0011352E | yes | no  |       | 2 0.029883   | 82.85  |
| IVEDIESFIKPYSVEEQKN(de)ITSCPDGAPFIQHGPDYR       | 4278.0579 | IPI00124221 | IPI00124221 | yes | yes | 4,5   | 7.6544E-15   | 107.95 |
| IVGCPPGGAGGN(de)DTEIACIR                        | 2126.0249 | IPI00128567 | IPI00128567 | yes | yes |       | 3 0.013236   | 64.298 |
| IVGGTN(de)ASIGEPWQVSIQVK                        | 2268.1903 | IPI00113057 | IPI00113057 | yes | yes | 2,3   | 6.6671E-49   | 196.4  |
| IVGSPFIGTGVN(de)K                               | 1489.7963 | IPI0013480E | IPI0013480E | yes | no  | 2,3   | 6.4695E-55   | 210.38 |
| IVICQPGTEAEVTDEIMDTDVNCVPCPKGHFN(de)TSSPR       | 4300.9497 | IPI0011642E | IPI0011642E | yes | yes |       | 4 2.1909E-08 | 79.286 |
| IVIDPSGSMNIYVIDGSDSIGSSN(de)FTGAK               | 3056.5012 | IPI0011406E | IPI0011406E | yes | no  |       | 3 3.991E-05  | 80.355 |
| IVIDPSGSMNIYVIDGSDSIGSSN(de)FTGAKR              | 3212.6023 | IPI0011406E | IPI0011406E | yes | no  |       | 4 0.0001237  | 67.778 |
| IVIIDPAISN(de)NSFSSNPYGPYDR                     | 2651.3231 | IPI00848693 | IPI00848693 | yes | yes | 3,4   | 1.4815E-08   | 111.57 |
| IVIQNG(de)AHEVFNHK                              | 1604.8423 | IPI00134704 | IPI00134704 | yes | yes |       | 3 0.019958   | 73.881 |
| IVIWTAEEQGGIGASQYIEIHKAN(de)ISK                 | 3004.5294 | IPI0012605C | IPI0012605C | yes | no  | 3,4   | 6.7981E-09   | 113.51 |
| IVYIEHNIEN(de)STK                               | 1799.9781 | IPI0032119C | IPI0032119C | yes | no  | 2,3,4 | 2.1917E-11   | 160.47 |
| IVYIEHNIEN(de)STKEEIIAAIEK                      | 2796.5273 | IPI0032119C | IPI0032119C | yes | no  | 2,3,4 | 2.0219E-10E  | 230.71 |
| IVKIPSGTIVISN(de)ATEGDGGIYR                     | 2359.2747 | IPI0012915E | IPI0012915E | yes | no  |       | 3 8.2875E-31 | 172.66 |
| IVN(de)GSGPHQGR                                 | 1120.5738 | IPI0032202E | IPI0032202E | yes | yes |       | 2 0.016738   | 81.525 |
| IVPCEFGVIYPIAEN(de)FSR                          | 2110.0557 | IPI0012190E | IPI0012190E | yes | no  | 2,3   | 0.0001263    | 111.33 |



|                                                 |           |             |             |     |     |         |   |             |        |
|-------------------------------------------------|-----------|-------------|-------------|-----|-----|---------|---|-------------|--------|
| IVPIENGEIVVSIVNGRPGAIN(de)FSYSPIIR              | 3222.7765 | IPI00116913 | IPI00116913 | yes | yes |         | 3 | 0.018203    | 54.3   |
| IVQAQYWHDPKESVYRN(de)YSIFIADINQER               | 3694.8532 | IPI00331318 | IPI00331318 | yes | no  | 3,4     |   | 8.7472E-05  | 84.404 |
| IVQDVAN(de)NTNEEAGDGTATVIAR                     | 2559.2413 | IPI00308885 | IPI00308885 | yes | no  |         | 3 | 0.0013663   | 74.251 |
| IVSN(de)ASCTTNCIAPIAK                           | 1818.8968 | IPI00850337 | IPI00850337 | yes | no  |         | 2 | 2.7833E-09  | 146.81 |
| IVTQTIPCN(de)K                                  | 1172.6223 | IPI00307966 | IPI00307966 | yes | yes |         | 2 | 1.0316E-31  | 196.27 |
| IVTQTIPCN(de)KTIFWSK                            | 1935.0288 | IPI00307966 | IPI00307966 | yes | yes |         | 2 | 5.0554E-25  | 179.81 |
| IVVN(de)VSDKNDHAPWFTSPSYDGR                     | 2603.2405 | IPI00623114 | IPI00623114 | yes | no  |         | 3 | 0.0089119   | 72.145 |
| IVVPINNREN(de)ISDPTSPIR                         | 2133.1542 | IPI00136925 | IPI00136925 | yes | no  |         | 2 | 1.6279E-08  | 140.89 |
| IVVPINNREN(de)ISDPTSPIRR                        | 2289.2553 | IPI00136925 | IPI00136925 | yes | no  |         | 3 | 2.7087E-05  | 124.46 |
| IVYN(de)HSSGR                                   | 1031.5148 | IPI00133500 | IPI00133500 | yes | yes |         | 2 | 0.013288    | 101.65 |
| IWDPSSHPIQN(de)ISR                              | 1705.8536 | IPI00338209 | IPI00338209 | yes | no  | 2,3     |   | 8.9377E-12  | 159.18 |
| IWIPVN(de)ITWADIEDK                             | 1811.9458 | IPI00126253 | IPI00126253 | yes | no  |         | 3 | 6.0864E-05  | 126.1  |
| IWIPVN(de)ITWADIEDKDGR                          | 2140.0953 | IPI00126253 | IPI00126253 | yes | no  | 2,3     |   | 9.5323E-21  | 169.09 |
| IWVHNGAPVN(de)ASASCR                            | 1737.8369 | IPI00464135 | IPI00464135 | yes | yes | 2,3     |   | 0.0009048   | 113.59 |
| IWVN(de)SSDGISPVIK                              | 1570.8355 | IPI00848693 | IPI00848693 | yes | yes | 2,3     |   | 6.0881E-34  | 197.17 |
| IYAGMVSIMDEAVGNV(de)TK                          | 1896.9325 | IPI00652358 | IPI00652358 | yes | no  | 2,3     |   | 1.5425E-21  | 172.97 |
| IYN(de)VTHQFCNASVMDPTCVR                        | 2411.0821 | IPI00132600 | IPI00132600 | yes | no  | 2,3     |   | 1.5365E-42  | 195.77 |
| IYNVTHQFCN(de)ASVMDPTCVR                        | 2411.0821 | IPI00132600 | IPI00132600 | yes | no  | 2,3     |   | 1.5365E-42  | 195.77 |
| IYPIEN(de)ITIAPDPHPDSIPPVAYNPWMDIR              | 3542.7908 | IPI01023131 | IPI01023131 | yes | no  | 3,4     |   | 0.0005101   | 61.911 |
| IYSDQCHHN(de)ISIIPPTEIVCNR                      | 2762.3269 | IPI00123442 | IPI00123442 | yes | yes |         | 3 | 0.0009842   | 85.35  |
| IYSDQCHHNISIPPTEIVCN(de)R                       | 2762.3269 | IPI00123442 | IPI00123442 | yes | yes |         | 3 | 0.0009842   | 85.35  |
| IYVIDGTQN(de)DTAFVFR                            | 1954.9789 | IPI00308658 | IPI00308658 | yes | no  |         | 3 | 2.7878E-08  | 142.45 |
| IYWISSGN(de)HTINR                               | 1559.7845 | IPI00119063 | IPI00119063 | yes | yes | 2,3     |   | 5.9678E-42  | 202.29 |
| IYWISSGNHTIN(de)R                               | 1559.7845 | IPI00119063 | IPI00119063 | yes | yes | 2,3     |   | 5.9678E-42  | 202.29 |
| IYWTDGDN(de)ISMANMDGSNHTIIFSGQK                 | 3014.3539 | IPI00119063 | IPI00119063 | yes | yes |         | 3 | 4.5794E-20  | 146.06 |
| IYWTDGDNISMANMDGSN(de)HTIIFSGQK                 | 3014.3539 | IPI00119063 | IPI00119063 | yes | yes |         | 3 | 4.5794E-20  | 146.06 |
| KAFITN(de)FSMIIDGVTYPGVVK                       | 2299.2286 | IPI00312711 | IPI00312711 | yes | no  | 2,3,4   |   | 1.9277E-16  | 155.03 |
| KAFITN(de)FSMIIDGVTYPGVVKEK                     | 2556.3662 | IPI00312711 | IPI00312711 | yes | no  | 3,4,5   |   | 9.0579E-40  | 185.61 |
| KAWGISVINPN(de)KTK                              | 1554.8882 | IPI00989096 | IPI00989096 | yes | yes | 2,3     |   | 0.0001236   | 138.01 |
| KCEAN(de)ITISSPAR                               | 1445.7297 | IPI00894972 | IPI00894972 | yes | no  |         | 2 | 0.012604    | 88.282 |
| KCIQIQAIN(de)MSSCPIDSR                          | 2120.0177 | IPI00648288 | IPI00648288 | yes | no  |         | 3 | 0.000503    | 99.055 |
| KCNSDN(de)ISYVIHCEPENNTK                        | 2421.0689 | IPI00323053 | IPI00323053 | yes | no  |         | 3 | 2.685E-05   | 122.44 |
| KCNSDNISYVIHCEPEN(de)NTK                        | 2421.0689 | IPI00323053 | IPI00323053 | yes | no  |         | 3 | 2.685E-05   | 122.44 |
| KCPN(de)CTETAVNGEIVVMYDVRNREEK                  | 2954.3572 | IPI00970438 | IPI00970438 | yes | no  | 3,4     |   | 0.0006553   | 90.464 |
| KCQEAIN(de)ATCK                                 | 1321.6119 | IPI00314443 | IPI00314443 | yes | no  | 2,3     |   | 0.012042    | 93.839 |
| KDGSQDFN(de)ETWENYEK                            | 1988.8388 | IPI00128206 | IPI00128206 | yes | yes |         | 2 | 7.4495E-09  | 148.52 |
| KDTCAQECSHFN(de)ITK                             | 1837.8087 | IPI00132474 | IPI00132474 | yes | no  | 2,3     |   | 2.0031E-11  | 158.17 |
| KEDSCQIN(de)YSEGPCIGMQR                         | 2400.0144 | IPI00127352 | IPI00127352 | yes | yes | 2,3     |   | 5.5189E-33  | 183.56 |
| KEN(de)SSEICSNNGECVCGQCVCVR                     | 2646.0349 | IPI00132474 | IPI00132474 | yes | no  | 3,4     |   | 8.1454E-59  | 198.96 |
| KEN(de)SSYQVINWR                                | 1522.7528 | IPI00153316 | IPI00153316 | yes | yes |         | 3 | 0.0005041   | 141.1  |
| KENG(de)VFEIISNSSGR                             | 1651.7802 | IPI00757771 | IPI00757771 | yes | no  |         | 3 | 0.01607     | 84.566 |
| KENGVFEEISNS(de)SGR                             | 1651.7802 | IPI00757771 | IPI00757771 | yes | no  |         | 3 | 0.01607     | 84.566 |
| KEQETCIAPEIEHGN(de)YSTTQR                       | 2490.1445 | IPI00122117 | IPI00122117 | yes | yes |         | 3 | 2.9769E-30  | 171    |
| KEVHFFVNA(de)SDVDSVK                            | 1819.9105 | IPI00310049 | IPI00310049 | yes | yes |         | 3 | 9.4799E-05  | 126.77 |
| KFHVN(de)YTQPIVAVK                              | 1642.9195 | IPI00123704 | IPI00123704 | yes | no  |         | 2 | 6.0188E-05  | 139.86 |
| KFPVPFQKEN(de)VTATIVEIGR                        | 2272.258  | IPI00134691 | IPI00134691 | yes | yes | 2,3,4   |   | 1.5033E-61  | 176.94 |
| KGCADYCN(de)QTITK                               | 1557.6916 | IPI00987265 | IPI00987265 | yes | no  | 2,3     |   | 5.2235E-06  | 149.69 |
| KGIVSGGVYNHSHVGCIPYTIPTCEHHVN(de)GSRPPCTGEGDTPF | 4558.1329 | IPI00113517 | IPI00113517 | yes | yes |         | 5 | 0.0018523   | 52.931 |
| KGN(de)NTINPFIIIPSASDVPTGCPNQWWPYAGHCYR         | 3916.8202 | IPI00126186 | IPI00126186 | yes | yes |         | 4 | 3.9711E-05  | 68.942 |
| KGQNMVCGMGCDN(de)DSIVQQIFNAEIDTYTR              | 3591.5851 | IPI00132600 | IPI00132600 | yes | no  | 3,4,5   |   | 4.0397E-59  | 184.03 |
| KGYW(de)ASYNIPFHKTINWSGYPIIVHK                  | 3281.6815 | IPI00471081 | IPI00471081 | yes | yes |         | 5 | 0.023579    | 55.734 |
| KIDFIVIN(de)ETR                                 | 1346.7558 | IPI00125813 | IPI00125813 | yes | no  | 2,3     |   | 0.000401    | 121.04 |
| KIDNEVIQIISGN(de)ATITIAMR                       | 2412.341  | IPI00126834 | IPI00126834 | yes | no  |         | 3 | 3.638E-23   | 166.57 |
| KIIASPNEEN(de)MTEIISMR                          | 2075.0391 | IPI00322575 | IPI00322575 | yes | no  | 2,3     |   | 2.5698E-37  | 191.93 |
| KIN(de)ASIVTSFVEIPIVSNVSIR                      | 2385.3631 | IPI00323857 | IPI00323857 | yes | no  | 2,3,4   |   | 1.9439E-39  | 186.06 |
| KIN(de)CSQEVPGSSQCDREPEPR                       | 2472.1122 | IPI00881836 | IPI00881836 | yes | yes |         | 3 | 0.0097365   | 75.239 |
| KIN(de)TTNGKSDFQVPCQYSQQIK                      | 2583.2751 | IPI00126188 | IPI00126188 | yes | yes |         | 3 | 3.9604E-07  | 116.6  |
| KINASIVTSFVEIPIVSN(de)VSIR                      | 2385.3631 | IPI00323857 | IPI00323857 | yes | no  | 2,3,4   |   | 1.9439E-39  | 186.06 |
| KINIDGS(de)NYTIK                                | 1477.814  | IPI00119063 | IPI00119063 | yes | yes | 2,3     |   | 0.0007241   | 135.02 |
| KIPIN(de)FTEGAR                                 | 1244.6877 | IPI00129243 | IPI00129243 | yes | no  |         | 2 | 0.014254    | 91.961 |
| KIQIN(de)NSENTIR                                | 1428.7685 | IPI00223446 | IPI00223446 | yes | yes |         | 2 | 0.0077503   | 96.82  |
| KISTN(de)ITIVCKPGDIESAPVIR                      | 2410.3254 | IPI00308971 | IPI00308971 | yes | yes | 3,4     |   | 0.0004195   | 93.92  |
| KISTSPFAIN(de)ITMIPK                            | 1759.9906 | IPI00666034 | IPI00666034 | yes | no  |         | 3 | 4.6424E-05  | 131.86 |
| KITN(de)ITEAISDIPR                              | 1569.8726 | IPI00342691 | IPI00342691 | yes | yes |         | 3 | 0.0001967   | 128.31 |
| KIVIDPSGSMNIYIVIDGSDSIGSS(de)NFTGAK             | 3184.5962 | IPI00114065 | IPI00114065 | yes | no  |         | 4 | 0.01217     | 50.986 |
| KIVIYIEHNIEK(de)NSTK                            | 1928.0731 | IPI00321190 | IPI00321190 | yes | no  |         | 3 | 0.064161    | 68.972 |
| KKENGVFEEISN(de)SSGR                            | 1779.8751 | IPI00757771 | IPI00757771 | yes | no  | 2,3     |   | 3.312E-12   | 159.18 |
| KKEVHFFVN(de)ASDVDSVK                           | 1948.0054 | IPI00310049 | IPI00310049 | yes | yes |         | 3 | 0.006928    | 86.548 |
| KKQEIPSN(de)CSIPYHVYNIK                         | 2317.1889 | IPI00311305 | IPI00311305 | yes | yes |         | 3 | 6.7519E-05  | 121.82 |
| KMVIWN(de)DSTIR                                 | 1361.7126 | IPI00135975 | IPI00135975 | yes | yes |         | 3 | 0.0070768   | 99.283 |
| KN(de)ISEIWDAYCYR                               | 1716.793  | IPI00987265 | IPI00987265 | yes | no  |         | 3 | 0.0002954   | 142.1  |
| KN(de)ITDIVEGAKK                                | 1314.7507 | IPI00649186 | IPI00649186 | yes | no  |         | 3 | 0.064325    | 77.597 |
| KN(de)ITSPVGVQPIINEHTFCAGITK                    | 2623.3792 | IPI00409148 | IPI00409148 | yes | yes |         | 3 | 9.0301E-13  | 126.91 |
| KN(de)SSQIAFIYNDQPPK                            | 1962.0211 | IPI00114236 | IPI00114236 | yes | no  |         | 3 | 0.0005031   | 118.2  |
| KNIQAVNEIATISQC(de)NDTSSAAMVQCIR                | 3234.5795 | IPI00138342 | IPI00138342 | yes | no  | 3,4,5   |   | 5.9424E-07  | 98.684 |
| KNPEAHMN(de)VSEIHK                              | 1608.8294 | IPI00652605 | IPI00652605 | yes | no  |         | 3 | 0.010063    | 86.803 |
| KNV(de)NISYTVNDSFFPQRPQK                        | 2381.2128 | IPI00381178 | IPI00381178 | yes | yes | 2,3,4,5 |   | 3.4769E-111 | 250.08 |
| KNVNISYTV(de)NDSFFPQRPQK                        | 2381.2128 | IPI00381178 | IPI00381178 | yes | yes | 2,3,4,5 |   | 3.4769E-111 | 250.08 |
| KPIIGHYKPDIAVVIEN(de)GTSIDR                     | 2635.4334 | IPI00410796 | IPI00410796 | yes | no  | 3,4     |   | 6.6646E-08  | 109.85 |
| KPISQEFAYVN(de)ASGEHGIVVFSIGSMVSEIPEKK          | 3805.9237 | IPI00134691 | IPI00134691 | yes | no  | 4,5     |   | 7.3655E-12  | 100.58 |
| KQIIN(de)ISQIVYGPEGSDIIVK                       | 2426.3785 | IPI00116509 | IPI00116509 | yes | no  |         | 3 | 1.7501E-07  | 113.86 |
| KQIN(de)ITTVVAPHEAISR                           | 1876.053  | IPI00808027 | IPI00808027 | yes | no  |         | 3 | 0.0066438   | 83.54  |
| KQPSPPGN(de)TTGGPIGSAASPAHQASQPIYINHP           | 3460.7124 | IPI01027336 | IPI01027336 | yes | no  |         | 4 | 5.8239E-07  | 67.367 |
| KQVTPIFFYFQ(de)NR                               | 1686.8882 | IPI00319509 | IPI00319509 | yes | no  | 2,3     |   | 0.0010961   | 119.39 |
| KSCHTAVGTSEGWNVPMGIY(de)NQTGSCK                 | 3081.4107 | IPI00471080 | IPI00471080 | yes | no  | 3,4     |   | 0.0001751   | 84.947 |
| KSDTQNIYIN(de)VSTGR                             | 1694.8588 | IPI01023214 | IPI01023214 | yes | no  |         | 3 | 0.0001284   | 125.97 |

|                                              |           |             |             |     |     |       |   |            |        |
|----------------------------------------------|-----------|-------------|-------------|-----|-----|-------|---|------------|--------|
| KTCNPETFPIR(de)NESIQCPSTAR                   | 2518.2057 | IPI0064918E | IPI0064918E | yes | no  |       | 3 | 0.0002474  | 94.882 |
| KTGEA(de)NITQIYTQEAFDIQTQHAR                 | 2875.4464 | IPI0031009C | IPI0031009C | yes | no  | 3,4   |   | 3.7571E-46 | 188.23 |
| KTGVHDGDFEY(de)NITTTIAANK                    | 2407.202  | IPI0010884E | IPI0010884E | yes | no  | 3,4   |   | 7.4368E-12 | 142.97 |
| KTHMFN(de)FTSGFK                             | 1443.6969 | IPI00121274 | IPI00121274 | yes | yes |       | 3 | 0.01058    | 93.011 |
| KTN(de)QSCEIVIDSTEK                          | 1750.8407 | IPI0031005E | IPI0031005E | yes | no  | 2,3   |   | 1.1294E-11 | 162.41 |
| KTN(de)QSCEIVIDSTEKVNSYIGR                   | 2637.3068 | IPI0031005E | IPI0031005E | yes | no  |       | 3 | 1.7125E-30 | 168.27 |
| KTTIEN(de)FTCPPEYK                           | 1629.7709 | IPI0042081C | IPI0042081C | yes | yes | 2,3   |   | 0.008624   | 94.122 |
| KTYAVYDIFDTAMIN(de)NSR                       | 2121.0201 | IPI0022679C | IPI0022679C | yes | no  | 2,3   |   | 2.8563E-08 | 139.08 |
| KVC(de)NGIGIGEFKDTISINATNIK                  | 2491.3105 | IPI0012119C | IPI0012119C | yes | no  | 3,4   |   | 2.5947E-05 | 104.38 |
| KVEAEAIN(de)ATAIR                            | 1384.7674 | IPI0075485E | IPI0075485E | yes | no  |       | 2 | 0.014575   | 85.457 |
| KVEVEAVN(de)ATAVK                            | 1356.7613 | IPI0060806E | IPI0060806E | yes | no  | 2,3   |   | 1.4212E-09 | 159.22 |
| KVEVEPIN(de)STAVHVSWK                        | 1922.0262 | IPI00110264 | IPI00110264 | yes | yes | 2,3   |   | 2.098E-08  | 145.48 |
| KVIIN(de)NSIDEPR                             | 1396.7674 | IPI0041114E | IPI0041114E | yes | no  |       | 3 | 0.0061851  | 99.752 |
| KVIVAPPSEEA(de)NTTK                          | 1582.8566 | IPI0087541E | IPI0087541E | yes | no  |       | 2 | 0.0055355  | 93.51  |
| KVPS(de)NSTETVIESDQFQPGVR                    | 2317.155  | IPI0011929E | IPI0011929E | yes | no  | 2,3   |   | 1.0087E-11 | 143.67 |
| KVYEEVIN(de)VTPNDGFAK                        | 1921.9785 | IPI0062489E | IPI0062489E | yes | no  | 2,3   |   | 0.0004885  | 118.48 |
| KWGH(de)NVTEFQQR                             | 1528.7535 | IPI0075438E | IPI0075438E | yes | yes | 2,3   |   | 0.0016919  | 128.08 |
| KWPERISAI(de)DNIINHSSIFIK                    | 2480.354  | IPI00123342 | IPI00123342 | yes | yes | 3,4   |   | 3.6478E-07 | 117.26 |
| KYEQAK(de)NISQDIEK                           | 1692.8683 | IPI0040001E | IPI0040001E | yes | no  |       | 2 | 1.1623E-10 | 164.41 |
| KYFDQVDIS(de)NGIDWSIDHK                      | 2279.0859 | IPI0013345E | IPI0013345E | yes | yes |       | 3 | 2.9063E-06 | 132.51 |
| KYFSIKN(de)QTVPFIEEDVR                       | 2325.2369 | IPI00153202 | IPI00153202 | yes | no  |       | 3 | 0.0001609  | 105.39 |
| KYHDYYITSTSN(de)GSIEGIENR                    | 2446.1401 | IPI00130754 | IPI00130754 | yes | yes |       | 3 | 1.3519E-08 | 129.46 |
| KYQTIN(de)CSVNVR                             | 1480.7456 | IPI0042083E | IPI0042083E | yes | no  |       | 3 | 0.0012635  | 123.67 |
| MAAAIN(de)ATGRPIAFSCSWPAYEGGIPPKVNYTEVSR     | 3880.9029 | IPI0031559E | IPI0031559E | yes | no  |       | 4 | 3.7463E-05 | 68.942 |
| MAAAINATGRPIAFSCSWPAYEGGIPPKVN(de)YTEVSR     | 3880.9029 | IPI0031559E | IPI0031559E | yes | no  |       | 4 | 3.7463E-05 | 68.942 |
| MAIQYGSQNNQVAFPIYIN(de)VTTIHEAIER            | 3562.7879 | IPI00621027 | IPI00621027 | yes | yes | 3,4,5 |   | 7.2267E-59 | 178.53 |
| MAIN(de)SSTEDGIK                             | 1264.5969 | IPI0012916E | IPI0012916E | yes | yes |       | 2 | 0.015839   | 80.312 |
| MCQIYPETFCVNTN(de)SSDIIQAFR                  | 2810.2536 | IPI0013439C | IPI0013439C | yes | yes |       | 3 | 0.0021234  | 73.21  |
| MDFIIFN(de)YSAPSIR                           | 1835.8916 | IPI0055350E | IPI0055350E | yes | yes |       | 2 | 4.1919E-06 | 140.96 |
| MDGHCAPIRTEAGVFE(de)YVADPTFENFTGGVK          | 3414.5649 | IPI00405742 | IPI00405742 | yes | no  |       | 4 | 4.7442E-06 | 83.934 |
| MDGHCAPIRTEAGVFE(de)YVADPTFENFTGGVKK         | 3542.6599 | IPI00405742 | IPI00405742 | yes | no  | 3,4,5 |   | 2.0316E-07 | 94.73  |
| MEAHN(de)VSAPFNFSIPPGFGHR                    | 2311.0957 | IPI00115482 | IPI00115482 | yes | no  | 2,3,4 |   | 6.4322E-17 | 155.79 |
| MEAHNVSAPFN(de)FSIPPGFGHR                    | 2311.0957 | IPI00115482 | IPI00115482 | yes | no  | 2,3,4 |   | 6.4322E-17 | 155.79 |
| MEISVGAIQAN(de)R                             | 1287.6605 | IPI00108811 | IPI00108811 | yes | yes |       | 2 | 0.0009151  | 111.94 |
| MFSQN(de)DTR                                 | 997.42873 | IPI0012925C | IPI0012925C | yes | yes |       | 2 | 0.0074272  | 128.38 |
| MGCQHHCVPPTSGPTCYCN(de)SSFQIQADGK            | 3323.3675 | IPI0011906E | IPI0011906E | yes | no  | 3,4   |   | 2.1131E-10 | 115.79 |
| MGDREIGN(de)ASQIFDSWIK                       | 2137.0262 | IPI0013458E | IPI0013458E | yes | yes | 2,3   |   | 6.0726E-20 | 166.77 |
| MGFNTINSIISN(de)NSK                          | 1638.8036 | IPI00454124 | IPI00454124 | yes | no  |       | 2 | 4.0659E-06 | 141.37 |
| MHING(de)SNVQVIHR                            | 1503.7729 | IPI0011906E | IPI0011906E | yes | yes | 2,3,4 |   | 2.8261E-15 | 172.13 |
| MIEN(de)GSISFIPTIR                           | 1576.8283 | IPI00123194 | IPI00123194 | yes | yes | 2,3   |   | 3.4988E-32 | 193.47 |
| MIHN(de)TTGVYTCSAHGTWTNEVIKR                 | 2775.3221 | IPI0047520E | IPI0047520E | yes | no  |       | 3 | 3.5007E-05 | 99.092 |
| MITNEKIDAYNEA(de)AVSIINSSTR                  | 2539.2588 | IPI0038029E | IPI0038029E | yes | yes |       | 3 | 0.019556   | 64.522 |
| MNIQN(de)ISIVISPTVQEFIINCIR                  | 2838.4884 | IPI0085093C | IPI0085093C | yes | yes |       | 3 | 0.0084218  | 72.771 |
| MNPAGPVIEN(de)ETVTEICSTPK                    | 2270.1287 | IPI0098851E | IPI0098851E | yes | no  | 2,3   |   | 0.0084538  | 68.369 |
| MPFPIDQDFYVSPFTQDIIN(de)R                    | 2542.2202 | IPI0031817E | IPI0031817E | yes | yes |       | 3 | 7.9562E-08 | 120.11 |
| MPSQASAGNVYPQPIIN(de)SSMCIEDSR               | 2851.2939 | IPI00224752 | IPI00224752 | yes | yes | 3,4   |   | 1.5709E-17 | 146.25 |
| MQVVSN(de)GTVTTAIWR                          | 1661.8559 | IPI0033117E | IPI0033117E | yes | no  | 2,3   |   | 4.6763E-06 | 140.22 |
| MRSPGAQ(de)DNVSVSQGMR                        | 1818.8465 | IPI0034858E | IPI0034858E | yes | no  |       | 3 | 3.9912E-11 | 152.94 |
| MSPWSN(de)WSECDPCIK                          | 1895.7641 | IPI0023071E | IPI0023071E | yes | no  | 2,3   |   | 0.0002919  | 116.43 |
| MSQHPIDIQEDFNN(de)ATIVNASSIIPK               | 2881.428  | IPI00762812 | IPI00762812 | yes | yes |       | 3 | 0.0002723  | 86.946 |
| MSQHPIDIQEDFNNATIVN(de)ASSIIPK               | 2881.428  | IPI00762812 | IPI00762812 | yes | yes |       | 3 | 0.0002723  | 86.946 |
| MTISQN(de)NSIIR                              | 1275.6605 | IPI0010853E | IPI0010853E | no  | no  |       | 2 | 8.5268E-10 | 160.52 |
| MTISSIKDDIGACRN(de)CCSVTK                    | 2415.1015 | IPI00223352 | IPI00223352 | yes | yes |       | 3 | 0.0013683  | 88.385 |
| MTQESAIIFPFIN(de)K                           | 1637.8487 | IPI0085778C | IPI0085778C | yes | no  |       | 3 | 0.0117     | 79.466 |
| MVN(de)TTFICTATNAVGTGR                       | 1912.9135 | IPI0010937E | IPI0010937E | yes | no  | 2,3   |   | 5.8739E-12 | 251.41 |
| MVSIDIPYFADVVVPIN(de)MTMK                    | 2382.2037 | IPI0041114E | IPI0041114E | yes | no  |       | 3 | 0.0050164  | 69.081 |
| MYSEGSDIVPQSN(de)ETAIHYFK                    | 2415.1053 | IPI0013114E | IPI0013114E | yes | no  | 2,3   |   | 3.1457E-23 | 166.47 |
| MYSEGSDIVPQSN(de)ETAIHYFKK                   | 2543.2002 | IPI0013114E | IPI0013114E | yes | no  | 2,3   |   | 4.7068E-39 | 178.43 |
| MYVTN(de)DTEVAENNYEAIK                       | 2102.9467 | IPI0065853E | IPI0065853E | yes | no  |       | 2 | 2.7866E-24 | 131.31 |
| MYVTN(de)DTEVAENNYEAIKDFFR                   | 2668.2115 | IPI0065853E | IPI0065853E | yes | no  | 2,3   |   | 1.2839E-07 | 120.24 |
| N(de)ATIVNEADKIR                             | 1342.7205 | IPI0031950E | IPI0031950E | yes | no  |       | 2 | 0.0018635  | 117.7  |
| N(de)ATTYPPMCSQDAAR                          | 1681.7188 | IPI0012839E | IPI0012839E | yes | yes | 2,3   |   | 4.9387E-05 | 126.48 |
| N(de)GSIFAFR                                 | 910.4661  | IPI0012924C | IPI0012924C | yes | no  |       | 2 | 1.6447E-10 | 151.44 |
| N(de)GTNDGEYVFITGEDNYINFSK                   | 2496.1081 | IPI00127447 | IPI00127447 | yes | yes |       | 3 | 6.8312E-17 | 155.86 |
| N(de)GTSFDIHYGSGSISGYISQDTSVPCPK             | 2975.3607 | IPI00404551 | IPI00404551 | yes | no  |       | 3 | 0.000174   | 77.939 |
| N(de)ISEGFSGIPDNVDAAFAIPAHR                  | 2397.1713 | IPI0012924C | IPI0012924C | yes | yes |       | 3 | 6.7066E-08 | 107.41 |
| N(de)MTIFSDIVAEK                             | 1366.6803 | IPI00621027 | IPI00621027 | yes | no  |       | 2 | 0.000636   | 118.13 |
| N(de)STICDICIGPIK                            | 1489.7269 | IPI0013978E | IPI0013978E | yes | no  |       | 2 | 1.551E-06  | 152.88 |
| N(de)STIQAANIAGIK                            | 1299.7147 | IPI00222937 | IPI00222937 | yes | no  |       | 2 | 0.0004592  | 132.31 |
| N(de)STTIVMHMK                               | 1160.5682 | IPI0011906E | IPI0011906E | yes | yes |       | 2 | 0.016568   | 87.184 |
| N(de)TTISVHPSTR                              | 1211.6258 | IPI00126834 | IPI00126834 | yes | no  |       | 2 | 0.0004336  | 118.76 |
| N(de)TTSAAMVHCIR                             | 1359.6387 | IPI0013121E | IPI0013121E | yes | yes |       | 2 | 0.016321   | 79.492 |
| N(de)TTSYPPMCSQDAVGGQVISEIFTNR               | 2871.3167 | IPI0038728E | IPI0038728E | yes | yes |       | 3 | 2.3522E-45 | 181.82 |
| N(de)TTSYPPMCSQDAVGGQVISEIFTNRK              | 2999.4117 | IPI0038728E | IPI0038728E | yes | yes | 3,4   |   | 5.4547E-05 | 93.804 |
| N(de)VTIECPFKR                               | 1262.6441 | IPI0031005E | IPI0031005E | yes | no  |       | 2 | 0.0003408  | 123.79 |
| NACCSVN(de)TSQEIHK                           | 1646.7141 | IPI0011315E | IPI0011315E | yes | yes |       | 2 | 0.015582   | 76.358 |
| NAIN(de)ITFHAQNIPEGGAYEAEIR                  | 2487.2142 | IPI0011597E | IPI0011597E | yes | yes | 2,3,4 |   | 1.6817E-17 | 155.87 |
| NAIQAFGN(de)GTDVNMSPK                        | 1762.8308 | IPI0011635E | IPI0011635E | yes | no  |       | 2 | 2.8381E-15 | 162.26 |
| NAKGDEKEN(de)ITAEADISIK                      | 2158.1117 | IPI0012472E | IPI0012472E | yes | no  | 2,3   |   | 5.8352E-05 | 115.57 |
| NAN(de)CSTVSPGQTQCTCQK                       | 2039.8459 | IPI0046760C | IPI0046760C | yes | yes |       | 3 | 0.016514   | 67.416 |
| NATIAEQAKI(de)PATEKPVIIISK                   | 2221.2682 | IPI00123342 | IPI00123342 | yes | yes |       | 3 | 3.9779E-07 | 116.29 |
| NAVN(de)CTYKNEDDCVVR                         | 1955.8466 | IPI00266264 | IPI00266264 | yes | yes |       | 2 | 0.0065233  | 88.992 |
| NCGVN(de)CSGDVFTAIIIGEISSPNYPNPENSR          | 3527.5722 | IPI0065367E | IPI0065367E | yes | no  |       | 4 | 4.1484E-07 | 85.595 |
| NCKPIIIDN(de)VSFFGVK                         | 1849.976  | IPI00122581 | IPI00122581 | yes | no  |       | 3 | 6.3176E-18 | 170.11 |
| NCKPIIIDN(de)VSFFGVKDK                       | 2093.0979 | IPI00122581 | IPI00122581 | yes | no  |       | 3 | 0.0005136  | 105.39 |
| NEDRPIAPCGAIANSMFN(de)DTIEIYIVANESDPKPIPIPIK | 4422.224  | IPI0038731E | IPI0038731E | yes | no  | 4,5   |   | 9.2358E-15 | 91.942 |

|                                             |           |             |             |     |     |       |               |        |
|---------------------------------------------|-----------|-------------|-------------|-----|-----|-------|---------------|--------|
| NEDRPIAPCGAIANSFNDTIEIYIVAN(de)ESDPKPIPIPIK | 4422.224  | IPI0038731E | IPI0038731E | yes | no  | 4,5   | 9.2358E-15    | 91.942 |
| NEIMIN(de)SSIMR                             | 1306.6373 | IPI0037869E | IPI0037869E | yes | no  |       | 2 0.028723    | 71.176 |
| NEIQVN(de)TSQIPDTVTHYSEIYHDFTTTQVGMHDIVR    | 4187.9858 | IPI0012843Z | IPI0012843Z | yes | yes |       | 4 9.2989E-06  | 66.378 |
| NF(de)TAADWGHRS                             | 1260.5636 | IPI0033988E | IPI0033988E | yes | no  |       | 2 0.0009286   | 110.31 |
| NFKDITNIIN(de)NTFIR                         | 1821.9737 | IPI0065003E | IPI0065003E | yes | no  |       | 3 0.0005541   | 120.84 |
| NFQCVN(de)ASVINYDCDIQGK                     | 2243.994  | IPI0062648E | IPI0062648E | yes | no  | 2,3   | 9.8581E-147   | 265.22 |
| NGDAYG(de)YYNDSIK                           | 1478.6314 | IPI00471081 | IPI00471081 | yes | yes |       | 2 0.0002542   | 141.85 |
| NGDAYGYN(de)DSIK                            | 1478.6314 | IPI00471081 | IPI00471081 | yes | yes |       | 2 0.0002542   | 141.85 |
| NGIASGSGN(de)CSTGPNGDGSFHAWSIIEVK           | 2918.3253 | IPI00322497 | IPI00322497 | yes | yes | 3,4   | 2.9539E-41    | 172.37 |
| NGIYN(de)ITVIAIDADGR                        | 1703.8842 | IPI0013820E | IPI0013820E | yes | no  | 2,3   | 7.1124E-15    | 167.82 |
| NGN(de)WSEPPMCIHACVIPENIMEAHNIIIK           | 3386.6032 | IPI0100867E | IPI0100867E | yes | no  |       | 4 0.0093343   | 53.998 |
| NGNA(de)TIIR                                | 857.47191 | IPI0098582E | IPI0010999E | no  | no  |       | 2 0.014243    | 120.99 |
| NGNATI(de)IR                                | 857.47191 | IPI0098582E | IPI0010999E | no  | no  |       | 2 0.014243    | 120.99 |
| NGTNDGEYVFITGEDNYIN(de)FSK                  | 2496.1081 | IPI00127447 | IPI00127447 | yes | yes |       | 3 6.8312E-17  | 155.86 |
| NI(de)KEEKANVVASAIQIPQK                     | 2150.2059 | IPI0015314Z | IPI0015314Z | yes | yes |       | 3 1.7291E-13  | 150.91 |
| NI(de)TSPVGVQPIINEHTFCAGITK                 | 2495.2842 | IPI0040914E | IPI0040914E | yes | yes |       | 3 0.0001632   | 93.269 |
| NIETFAMN(de)ICEHFISFNHVTR                   | 2666.237  | IPI00223367 | IPI00223367 | yes | no  | 3,4   | 9.5126E-08    | 121.26 |
| NIFIN(de)HSETASAK                           | 1430.7154 | IPI0040914E | IPI0040914E | yes | yes | 2,3   | 1.7616E-217   | 216.88 |
| NIGGIETEDDYGYQGHVQTCN(de)FSAQMAK            | 3132.3553 | IPI0012676E | IPI0012676E | yes | yes | 3,4   | 2.2353E-06    | 101.41 |
| NIGPN(de)TTSTTITSDDFKPGVVR                  | 2220.1022 | IPI00118291 | IPI00118291 | yes | no  |       | 3 0.0056888   | 79.393 |
| NIIGIDENFVIN(de)SSTEHR                      | 2057.0178 | IPI0040660Z | IPI0040660Z | yes | yes | 2,3   | 1.9432E-21    | 172.84 |
| NIINDYVSN(de)QTQGMKIK                       | 1836.904  | IPI0013183C | IPI0013183C | yes | no  | 2,3   | 1.4163E-96    | 232.53 |
| NIINDYVSN(de)QTQGMKIEIIEIDER                | 2921.4441 | IPI0013183C | IPI0013183C | yes | no  | 3,4   | 1.7511E-44    | 180.04 |
| NIIPN(de)ITTSYIK                            | 1375.7711 | IPI0047108E | IPI0047108E | yes | no  |       | 2 0.0013829   | 106.26 |
| NIKRPYIVPII(de)WINETGTIGDEK                 | 2668.4588 | IPI00331214 | IPI00331214 | yes | yes |       | 3 5.0096E-12  | 142.98 |
| NIMIDIQKDTAVEGEEIEVN(de)CTAMASKPATTIR       | 3647.7845 | IPI0085672Z | IPI0085672Z | yes | no  | 3,4   | 3.386E-11     | 108.49 |
| NIPWYVIAGNHDHIGN(de)VSAQIAYS                | 2766.3878 | IPI00137491 | IPI00137491 | yes | yes | 2,3,4 | 1.1546E-16    | 144.27 |
| NIQAVNEIATISQCN(de)DTSSAAMVQCIR             | 3106.4846 | IPI0013834Z | IPI0013834Z | yes | no  | 2,3,4 | 2.7369E-51    | 183.07 |
| NIQVYN(de)ATSNSITVK                         | 1650.8577 | IPI0012143C | IPI0012143C | yes | no  |       | 2 3.9948E-70  | 222.45 |
| NITAFN(de)ETIFR                             | 1324.6776 | IPI0012470C | IPI0012470C | yes | yes |       | 2 3.3668E-06  | 149.23 |
| NITVI(de)EPVTQPFIVTNTTVK                    | 2341.2893 | IPI0010853E | IPI0010853E | yes | no  |       | 3 4.6767E-50  | 195.46 |
| NITVIEPVTQPFIVTN(de)TTVK                    | 2341.2893 | IPI0010853E | IPI0010853E | yes | no  |       | 3 4.6767E-50  | 195.46 |
| NKANIQFGEN(de)GTTISAVTNK                    | 2106.0705 | IPI00127447 | IPI00127447 | yes | yes | 2,3   | 1.116E-41     | 191.78 |
| NKNPQMN(de)FTEANEACK                        | 1894.8302 | IPI0030824E | IPI0030824E | yes | yes |       | 3 3.6323E-25  | 182.02 |
| NMICQWDPGRETIEYTN(de)YTIK                   | 2631.2098 | IPI0012015E | IPI0012015E | yes | yes |       | 3 3.7084E-11  | 137.69 |
| NMPPRIPANTMQIFIDN(de)NSIEGIPENYFNVIPK       | 3785.8909 | IPI00129867 | IPI00129867 | yes | no  |       | 4 0.0019952   | 57.803 |
| NN(de)DSTINNSATTIIGIQDCR                    | 2319.1125 | IPI0088174E | IPI0088174E | yes | no  |       | 3 1.0793E-05  | 103.71 |
| NNDSTIN(de)NSATTIIGIQDCR                    | 2319.1125 | IPI0088174E | IPI0088174E | yes | no  |       | 3 1.0793E-05  | 103.71 |
| NNQT(de)ECFNHVR                             | 1417.6157 | IPI0012466E | IPI0012466E | yes | no  |       | 2 0.0092184   | 88.338 |
| NPCNITREDY(de)APIVK                         | 1788.8829 | IPI0030796E | IPI0030796E | yes | yes | 2,3   | 6.7285E-06    | 143.93 |
| NPCTSEQN(de)CTSPFSYK                        | 1918.7826 | IPI00132474 | IPI00132474 | yes | yes |       | 2 4.1489E-13  | 161.91 |
| NPIGQAQSAVVIN(de)VTER                       | 1794.9588 | IPI0011929E | IPI0011929E | yes | no  | 2,3   | 1.4749E-08    | 144.73 |
| NPNN(de)NTIHPNIR                            | 1402.7066 | IPI0031950E | IPI0031950E | yes | no  | 2,3   | 0.0007839     | 122.39 |
| NPSANTFIHINA(de)SSFR                        | 1774.8751 | IPI0031553E | IPI0031553E | yes | yes |       | 2 3.5056E-05  | 129.43 |
| NQIVEI(de)EKVVIHPNHSVVDIGIIK                | 2692.5276 | IPI0040914E | IPI0040914E | yes | yes | 3,4   | 5.9534E-27    | 165.19 |
| NSFN(de)ISNIIVIHISHNK                       | 1949.0483 | IPI0012229Z | IPI0012229Z | yes | yes |       | 3 0.0060494   | 78.505 |
| NSQFDMN(de)STDIAIK                          | 1582.7297 | IPI0034606Z | IPI0034606Z | yes | yes |       | 2 0.0001276   | 123.42 |
| NTDKENPYIGIGN(de)YTICR                      | 2127.0055 | IPI0046823E | IPI0046823E | yes | no  |       | 3 0.000388    | 108.77 |
| NTETNVF(de)PQDKVIAGSNMTICCMSPTK             | 3141.4603 | IPI0011929E | IPI0011929E | yes | no  | 3,4   | 1.6964E-51    | 187.16 |
| NTGEIN(de)ITSIDREETPYFIITGYAIDSR            | 3300.6514 | IPI0011579Z | IPI0011579Z | yes | no  |       | 3 2.1473E-19  | 133.95 |
| NTQADVIN(de)ASWSVISNSTR                     | 2062.0079 | IPI0013218E | IPI0013218E | yes | yes | 2,3   | 1.6139E-52    | 199.99 |
| NTQADVIN(de)ASWSVISNSTRHEIER                | 2726.3372 | IPI0013218E | IPI0013218E | yes | yes |       | 3 5.649E-05   | 101.49 |
| NTQADVINASWSVISN(de)STR                     | 2062.0079 | IPI0013218E | IPI0013218E | yes | yes | 2,3   | 1.6139E-52    | 199.99 |
| NTQADVINASWSVISN(de)STRHEIER                | 2726.3372 | IPI0013218E | IPI0013218E | yes | yes |       | 3 5.649E-05   | 101.49 |
| NTQIIPVSEAIHESFDN(de)ETIVNDIMIIK            | 3279.6697 | IPI00120351 | IPI00120351 | yes | yes |       | 3 8.502E-07   | 103.25 |
| NVAIVAGDTGN(de)ATGIGEQGPTR                  | 2097.0451 | IPI0012227Z | IPI0012227Z | yes | no  | 2,3   | 0             | 381.1  |
| NVN(de)ISYIVNDSFFPQRPEK                     | 2266.1382 | IPI00122557 | IPI00122557 | yes | no  | 2,3,4 | 1.2004E-10E   | 248.13 |
| NVN(de)ISYTVNDSFFPQR                        | 1899.9115 | IPI0038117E | IPI0038117E | yes | yes |       | 2 0.0016383   | 92.977 |
| NVN(de)ISYTVNDSFFPQRPQK                     | 2253.1178 | IPI0038117E | IPI0038117E | yes | yes | 2,3,4 | 4.1645E-29E   | 326.53 |
| NVN(de)ISYTVNDSFFPQRPKIANK                  | 2792.461  | IPI0038117E | IPI0038117E | yes | yes |       | 3 0.0008894   | 90.972 |
| NVN(de)MSVICPTTIR                           | 1503.7538 | IPI00129867 | IPI00129867 | yes | no  |       | 2 1.4562E-15  | 174.95 |
| NVNISYIVNDS(de)FFPQRPEK                     | 2266.1382 | IPI00122557 | IPI00122557 | yes | no  | 2,3,4 | 1.2004E-10E   | 248.13 |
| NVNISYTVN(de)DSFFPQR                        | 1899.9115 | IPI0038117E | IPI0038117E | yes | yes |       | 2 0.0016383   | 92.977 |
| NVNISYTVN(de)DSFFPQRPKIANK                  | 2253.1178 | IPI0038117E | IPI0038117E | yes | yes | 2,3,4 | 4.1645E-29E   | 326.53 |
| NVNISYTVN(de)DSFFPQRPKIANK                  | 2792.461  | IPI0038117E | IPI0038117E | yes | yes |       | 3 0.0008894   | 90.972 |
| NVPGEIGINYN(de)ITADVAQK                     | 2015.0324 | IPI00130117 | IPI00130117 | yes | yes |       | 3 4.1244E-05  | 106.57 |
| NVTVV(de)IR                                 | 799.49159 | IPI0046921E | IPI0046921E | yes | yes |       | 2 0.055841    | 86.794 |
| NVVN(de)ITINDEAAMVEAVIYNPVSFAFEVTEDFIMYK    | 4166.0268 | IPI00118987 | IPI00118987 | yes | yes | 3,4   | 0.0042385     | 44.021 |
| NYEVQIFHVN(de)ATVTEEGTGIEFSR                | 2739.314  | IPI0012322Z | IPI0012322Z | yes | yes | 2,3   | 1.2773E-20E   | 284.98 |
| NYFHYN(de)QSFPPSYNIK                        | 2017.9323 | IPI0012926E | IPI0012926E | yes | yes | 2,3   | 2.8854E-32    | 142.1  |
| NYKNPN(de)ITISFTAER                         | 1766.8951 | IPI0013260C | IPI0013260C | yes | no  | 2,3   | 0.0004251     | 122.63 |
| NYN(de)FTIACNTK                             | 1344.6132 | IPI0032257E | IPI0032257E | yes | no  | 2,3   | 0.0002402     | 142.83 |
| NYN(de)FTIACNTKR                            | 1500.7143 | IPI0032257E | IPI0032257E | yes | no  |       | 2 0.017394    | 86.313 |
| NYYADN(de)QTCDGEIIFNMTK                     | 2295.9776 | IPI0082822Z | IPI0082822Z | yes | no  |       | 3 0.0002346   | 94.845 |
| NYYADN(de)QTCDGEIIFNMTTK                    | 2424.0726 | IPI0082822Z | IPI0082822Z | yes | no  |       | 3 7.1416E-05  | 102.78 |
| NYYADNQTCDGEIIFN(de)MTK                     | 2295.9776 | IPI0082822Z | IPI0082822Z | yes | no  |       | 3 0.0002346   | 94.845 |
| NYYADNQTCDGEIIFN(de)MTTK                    | 2424.0726 | IPI0082822Z | IPI0082822Z | yes | no  |       | 3 7.1416E-05  | 102.78 |
| PGHDEGAHNPDYEN(de)ITIAFR                    | 2252.0247 | IPI00112047 | IPI00112047 | yes | yes |       | 2 0.0093657   | 69.935 |
| QAIQTMQSEFFYITNIIN(de)DTIEIR                | 2988.4903 | IPI0011813C | IPI0011813C | yes | yes |       | 3 1.4606E-18E | 191.65 |
| QAVIQVN(de)QSFVSSTAQK                       | 1833.9585 | IPI0035646Z | IPI0035646Z | yes | no  |       | 3 0.008099    | 75.018 |
| QCDREHDCKDMSDEIGCVN(de)VTQCDGPNK            | 3366.3428 | IPI0031206Z | IPI0031206Z | yes | no  |       | 4 0.00232     | 68.445 |
| QCQEIQEVN(de)KTCEAIIFK                      | 2365.177  | IPI0011511E | IPI0011511E | yes | yes |       | 3 4.0028E-06  | 133.25 |
| QDIAISGN(de)ISSIYAMTQDK                     | 2053.999  | IPI0040574Z | IPI0040574Z | yes | no  | 2,3   | 9.5196E-12E   | 255.82 |
| QEHSQIVYHQSIN(de)ETISK                      | 2253.139  | IPI0035646Z | IPI0035646Z | yes | no  |       | 3 0.00123     | 86.213 |
| QEIN(de)DSIQVAER                            | 1400.6896 | IPI0032042C | IPI0032042C | yes | yes |       | 2 8.4348E-31  | 190.37 |
| QENNIINAEHGN(de)SSIFIENSTFESFGYHSVSPDR      | 4064.9141 | IPI0012581Z | IPI0012581Z | yes | no  |       | 4 2.0208E-11  | 95.108 |

|                                          |           |             |             |     |     |         |   |             |        |
|------------------------------------------|-----------|-------------|-------------|-----|-----|---------|---|-------------|--------|
| QENNIINAIEHGNSSIFIEN(de)STFESFGYHSVSPDR  | 4064.9141 | IPI00125813 | IPI00125813 | yes | no  |         | 4 | 2.0208E-11  | 95.108 |
| QETFGAIDIGGASTQITFVPQN(de)STIESPENSIQFR  | 3781.8435 | IPI0062695C | IPI0062695C | yes | no  |         | 4 | 0.0019344   | 51.617 |
| QEVMFITNVN(de)SSSSSTQIYQAVSR             | 2675.2861 | IPI00112614 | IPI00112614 | yes | yes |         | 3 | 0.017627    | 55.228 |
| QFAPSPNCN(de)KTEIIATIK                   | 2031.0459 | IPI0077609E | IPI0077609E | yes | no  |         | 3 | 0.0003672   | 110.97 |
| QFFN(de)ASVQFDNMDPIIDYINQR               | 2674.2486 | IPI00117842 | IPI00117842 | yes | yes |         | 3 | 3.237E-12   | 143.52 |
| QFWIFDVQNPDDVAKN(de)SSK                  | 2237.0753 | IPI00331214 | IPI00331214 | yes | yes | 2,3     |   | 1.9129E-65  | 218.25 |
| QGDQYSCMVGHEAIPMN(de)FTQK                | 2440.061  | IPI0047388C | IPI0047388C | yes | no  | 2,3,4   |   | 1.2346E-07  | 111.4  |
| QGPQAGGTTITIN(de)GTHIDTGSK               | 2153.0713 | IPI00405742 | IPI00405742 | yes | no  |         | 3 | 9.8711E-08  | 111.66 |
| QGPQAGGTTITIN(de)GTHIDTGSKEDVR           | 2652.3103 | IPI00405742 | IPI00405742 | yes | no  | 3,4     |   | 1.3465E-08  | 113.36 |
| QHGQFSIAVVGINIT(de)SIGIR                 | 2109.1695 | IPI0012119C | IPI0012119C | yes | no  |         | 3 | 0.0012629   | 84.375 |
| QIGASPSDDIIFGVFAQSKPDSAEPVN(de)R         | 2944.4567 | IPI0013042C | IPI0013042C | yes | no  | 3,4     |   | 0.0012317   | 72.316 |
| QIIAN(de)SSAIEETIIGHQGR                  | 2036.0651 | IPI00116913 | IPI00116913 | yes | no  | 2,3     |   | 1.8129E-191 | 290.57 |
| QIINAIQIN(de)NTAVGHAIVIPAR               | 2325.3281 | IPI0083074E | IPI0083074E | yes | yes |         | 3 | 4.0075E-72  | 213.99 |
| QIINAIQIN(de)NTAVGHAIVIPARR              | 2481.4292 | IPI0083074E | IPI0083074E | yes | yes |         | 4 | 5.5646E-08  | 117.3  |
| QIIQTQVASPAIHPPVSYN(de)DTAPR             | 2602.3503 | IPI0012898E | IPI0012898E | yes | no  |         | 3 | 1.4548E-20  | 148.01 |
| QIITEEKIPN(de)NTQWITWSPEGHK              | 2748.3871 | IPI00125813 | IPI00125813 | yes | no  | 2,3,4,5 |   | 2.9935E-277 | 318.69 |
| QIITEEKIPN(de)NTQWITWSPEGHKIAYVWK        | 3508.8143 | IPI00125813 | IPI00125813 | yes | no  |         | 4 | 5.4588E-06  | 100.79 |
| QIN(de)ISDSIAVIGIAK                      | 1540.8825 | IPI00463492 | IPI00463492 | yes | yes |         | 2 | 4.1867E-12  | 163.8  |
| QIN(de)ISDSIAVIGIAKPAHIYSK               | 2337.3056 | IPI00463492 | IPI00463492 | yes | yes | 3,4     |   | 1.5388E-08  | 127.32 |
| QIN(de)ISIIVK                            | 1026.6437 | IPI0011511E | IPI0011511E | yes | yes |         | 2 | 0.0029289   | 128.03 |
| QIN(de)ITTEDDDIYHMTVPYGRPR               | 2633.2544 | IPI00265291 | IPI00265291 | yes | yes |         | 3 | 6.6294E-05  | 97.32  |
| QINAYN(de)R                              | 877.44061 | IPI0047319C | IPI0047319C | yes | no  |         | 2 | 0.011951    | 104.11 |
| QINNGEIQPISEN(de)TTITFMSTK               | 2465.2108 | IPI00126834 | IPI00126834 | yes | no  |         | 3 | 5.1899E-49  | 195.53 |
| QINPPHTAN(de)SSITSK                      | 1593.8111 | IPI0098839C | IPI0098839C | yes | yes |         | 3 | 0.0035626   | 88.552 |
| QISCVANQN(de)GSQADCEIGNPFKR              | 2592.1809 | IPI0042083E | IPI0042083E | yes | no  |         | 3 | 7.5725E-08  | 114.55 |
| QIWDWSKHN(de)ITITQGK                     | 1954.0061 | IPI0012835E | IPI0012835E | yes | no  |         | 2 | 3.724E-07   | 144.97 |
| QIYPYN(de)SSNR                           | 1240.5836 | IPI0022982C | IPI0022982C | yes | yes |         | 2 | 0.0015335   | 112.36 |
| QKN(de)VNISYIVNDSFFPQRPEK                | 2522.2918 | IPI00122557 | IPI00122557 | yes | no  | 3,4,5   |   | 2.4168E-85  | 223.11 |
| QKNVNISYIVN(de)DSFFPQRPEK                | 2522.2918 | IPI00122557 | IPI00122557 | yes | no  | 3,4,5   |   | 2.4168E-85  | 223.11 |
| QN(de)FSFCR                              | 957.41269 | IPI00381303 | IPI00381303 | yes | yes |         | 2 | 0.04925     | 89.142 |
| QN(de)FSNITVSTEDQVK                      | 1708.8268 | IPI00129677 | IPI00129677 | yes | no  |         | 2 | 3.1963E-15E | 272.95 |
| QN(de)ITQKR                              | 886.49846 | IPI0013458E | IPI0013458E | yes | no  |         | 2 | 0.016975    | 124.83 |
| QNFSN(de)ITVSTEDQVK                      | 1708.8268 | IPI00129677 | IPI00129677 | yes | no  |         | 2 | 3.1963E-15E | 272.95 |
| QNPMTIGNVVI(de)FDKVTNQESPYQNHTGR         | 3299.6357 | IPI0012531C | IPI0012531C | yes | no  | 3,4     |   | 8.8437E-06  | 95.834 |
| QPEKTD(de)AEINETARPISPVNPK               | 2433.25   | IPI0040889E | IPI0040889E | yes | yes |         | 3 | 0.010645    | 73.809 |
| QPIYIN(de)CSCVTGGSASAK                   | 1911.8819 | IPI0030924E | IPI0030924E | yes | yes |         | 2 | 2.4954E-48  | 202.96 |
| QPKDCDFIEDGEERN(de)CTGK                  | 2296.9689 | IPI0012728C | IPI0012728C | yes | yes |         | 3 | 1.6063E-05  | 126.25 |
| QPNMN(de)ITQIK                           | 1185.6176 | IPI00310567 | IPI00310567 | yes | yes |         | 2 | 0.020428    | 86.344 |
| QQTECMVQQYSN(de)YSVNGEPVNGR              | 2687.1704 | IPI0039684C | IPI0039684C | yes | no  |         | 3 | 9.8077E-08  | 115.42 |
| QRYEDIVIN(de)ETINK                       | 1733.8948 | IPI00285117 | IPI00285117 | yes | no  | 2,3     |   | 0.0002491   | 130.07 |
| QRYHGF(de)INTSYHR                        | 1677.8124 | IPI0015405E | IPI0015405E | yes | no  |         | 3 | 0.031567    | 82.362 |
| QRYN(de)ITAK                             | 992.54033 | IPI00130661 | IPI00130661 | yes | yes |         | 2 | 2.4655E-05  | 134.26 |
| QSDYCWEIAPHMYFITPGQQPQPITNIIIVN(de)K     | 3897.9222 | IPI0032257E | IPI0032257E | yes | no  | 4,5     |   | 0.0003557   | 61.499 |
| QSDYCWEIAPHMYFITPGQQPQPITNIIIVN(de)KTGAK | 4255.1235 | IPI0032257E | IPI0032257E | yes | no  | 4,5     |   | 0.000407    | 59.792 |
| QSN(de)GSIAVISSIAGK                      | 1430.7729 | IPI0011559E | IPI0011559E | yes | no  | 2,3     |   | 2.4411E-44  | 205.98 |
| QSQPVHIIPMN(de)ETDHINMVFSNK              | 2678.2945 | IPI0013350C | IPI0013350C | yes | yes | 3,4     |   | 2.9836E-08  | 114.88 |
| QSQPVHIIPMNEDHINMVFSN(de)K               | 2678.2945 | IPI0013350C | IPI0013350C | yes | yes | 3,4     |   | 2.9836E-08  | 114.88 |
| QSTINTVDIYPMCHIIIGIKPHPNN(de)GTISHTK     | 3616.7953 | IPI00225072 | IPI00225072 | yes | no  |         | 4 | 0.0001458   | 67.641 |
| QTGDVTCN(de)CTDGR                        | 1482.5827 | IPI00119063 | IPI00119063 | yes | yes |         | 2 | 0.0027074   | 100.4  |
| QTPEYQN(de)R                             | 1034.4781 | IPI0015405E | IPI0015405E | yes | no  |         | 2 | 0.0087677   | 113.18 |
| QTQVGIVQYGAN(de)VTHEFNINK                | 2359.1921 | IPI00466371 | IPI00466371 | no  | no  | 2,3     |   | 8.7219E-101 | 237.31 |
| QTQVGIVQYGAN(de)VTHEFNINKYSSTEEVIVAANK   | 3750.8853 | IPI00466371 | IPI00466371 | no  | no  |         | 4 | 0.015319    | 47.919 |
| QTTAMDFSYAN(de)ETVCWVHVGDSAAQTQIK        | 3257.4758 | IPI00119063 | IPI00119063 | yes | no  | 3,4     |   | 8.4953E-10  | 114.01 |
| QVAIQTFGN(de)QTSIIPAGGAGYK               | 2220.1539 | IPI0022871E | IPI0022871E | yes | yes | 2,3,4   |   | 1.2593E-30  | 168.3  |
| QVEEIIIVN(de)HTGIR                       | 1506.8154 | IPI00263041 | IPI00263041 | yes | yes |         | 2 | 0.0009175   | 111.83 |
| QVEIIEYPYHEQIIVVAPEIITGHN(de)YTIK        | 3463.8028 | IPI00223987 | IPI00223987 | yes | yes | 3,4     |   | 7.6963E-42  | 171.3  |
| QVSTIIN(de)NTDK                          | 1231.6408 | IPI0039684C | IPI0039684C | yes | no  |         | 2 | 6.9594E-07  | 155.86 |
| QVTPIFFYFQN(de)R                         | 1558.7932 | IPI0031950E | IPI0031950E | yes | no  | 2,3     |   | 0.0005216   | 134.75 |
| QYYN(de)SSGTQSQR                         | 1417.6222 | IPI00848991 | IPI00848991 | yes | no  |         | 2 | 0.016914    | 79.492 |
| RAEDYGPVEVISHWHP(de)NITINIVDDHTPWVK      | 3636.8114 | IPI00121627 | IPI00121627 | yes | yes |         | 4 | 3.1519E-07  | 79.382 |
| RAEDYGPVEVISHWHPNITI(de)NIVDDHTPWVK      | 3636.8114 | IPI00121627 | IPI00121627 | yes | yes |         | 4 | 3.1519E-07  | 79.382 |
| RCTICDEEHGIEVETN(de)CTITQNTK             | 2907.2797 | IPI0011089E | IPI0011089E | yes | yes |         | 3 | 1.3095E-34  | 168.64 |
| RDDIHPTIPAGQYFI(de)NITYNYPVHSFDGR        | 3405.6531 | IPI0038731E | IPI0038731E | yes | no  | 3,4     |   | 2.1619E-22  | 143.32 |
| RDDYRPTWTI(de)NQTEPVAGNYYPVNTR           | 3125.4955 | IPI00381303 | IPI00381303 | yes | yes | 3,4     |   | 1.5425E-13  | 133.74 |
| RDQGN(de)VTDMA SMK                       | 1451.6497 | IPI00471081 | IPI00471081 | yes | yes |         | 3 | 9.3003E-07  | 155.86 |
| RFANEYPN(de)ITR                          | 1379.6946 | IPI00130573 | IPI00130573 | yes | yes |         | 2 | 0.0007781   | 134.99 |
| RFHSDIN(de)ISESIIPAVIEK                  | 2167.1637 | IPI00831484 | IPI00831484 | yes | yes |         | 3 | 0.000817    | 93.495 |
| RFIQSAEFFN(de)YTVR                       | 1776.8948 | IPI0012740E | IPI0012740E | yes | yes |         | 2 | 0.0079856   | 93.348 |
| RFTAPDTIFA(de)NGSVYPPNEGFCPCR            | 2872.3061 | IPI0085713C | IPI0085713C | yes | yes |         | 3 | 0.0010092   | 83.251 |
| RGCKDN(de)ATDSVPIR                       | 1587.7787 | IPI00119063 | IPI00119063 | yes | yes | 2,3     |   | 0.0080521   | 101.3  |
| RGDDIYTN(de)VTVSIVEAIVGFEMDITHIDGHK      | 3443.7031 | IPI00320241 | IPI00320241 | yes | yes | 3,4,5,6 |   | 1.91E-83    | 201.66 |
| RGPECSQN(de)YTAPTGVIK                    | 1876.9101 | IPI0012399E | IPI0012399E | yes | yes | 2,3     |   | 0.0007125   | 112.24 |
| RGFTFDCAIAN(de)MTQQIR                    | 1981.9462 | IPI00621027 | IPI00621027 | yes | no  | 2,3     |   | 3.7007E-11  | 152.37 |
| RGVFITN(de)ETGQPIIGK                     | 1728.9523 | IPI0011196C | IPI0011196C | yes | no  | 2,3     |   | 8.235E-09   | 147.56 |
| RIAVDWESIGYN(de)ITR                      | 1791.9268 | IPI0012304C | IPI0012304C | yes | no  | 2,3     |   | 0.0018713   | 108.58 |
| RIGAIN(de)NSIIIEDR                       | 1695.9632 | IPI0011551E | IPI0011551E | yes | no  | 2,3     |   | 1.3033E-05  | 137.8  |
| RIQEGHEYDTFDIN(de)DTAQCFTK               | 2687.1922 | IPI00400073 | IPI00400073 | yes | yes |         | 3 | 4.1291E-59  | 200.6  |
| RIYAGMVSIMDEAVGN(de)VTK                  | 2053.0336 | IPI0065235E | IPI0065235E | yes | no  |         | 3 | 8.1266E-05  | 110.77 |
| RMEISVGAIQAN(de)R                        | 1443.7616 | IPI00108811 | IPI00108811 | yes | yes |         | 3 | 0.0002383   | 142.97 |
| RMHIN(de)GSNVQVIHR                       | 1659.874  | IPI00119063 | IPI00119063 | yes | yes | 2,3     |   | 0.0049967   | 100.55 |
| RN(de)FTAADWGH SR                        | 1416.6647 | IPI0033988E | IPI0033988E | yes | no  |         | 3 | 0.0027912   | 106.17 |
| RNPSANTFIHIN(de)ASSFR                    | 1930.9762 | IPI0031553E | IPI0031553E | yes | yes | 2,3     |   | 6.7549E-11  | 148.41 |
| RPFVVYEMEVDTIETTCHAIPTPIAN(de)CSVR       | 3676.7324 | IPI0012824E | IPI0012824E | yes | yes | 3,4,5   |   | 2.8557E-35  | 156.73 |
| RPYIVPIIWIN(de)ETGTIGDEK                 | 2313.2369 | IPI00331214 | IPI00331214 | yes | yes |         | 3 | 2.8651E-05  | 118.48 |
| RPYIVPIIWIN(de)ETGTIGDEKAEMFK            | 2919.5205 | IPI00331214 | IPI00331214 | yes | yes | 3,4     |   | 7.4821E-12  | 121.21 |
| RSN(de)FTPATNEAPQATVFPK                  | 2075.0436 | IPI0017203E | IPI0017203E | yes | no  | 2,3     |   | 2.2583E-32  | 179.87 |



|                                                  |           |             |             |     |     |       |   |             |        |
|--------------------------------------------------|-----------|-------------|-------------|-----|-----|-------|---|-------------|--------|
| RSPGAQD(de)NVSVSQGM                              | 1687.806  | IPI0034858€ | IPI0034858€ | yes | no  |       | 3 | 1.2208E-12  | 158.81 |
| RVIYIPAY(de)NCTIRPVS                             | 2049.1194 | IPI00469387 | IPI00469387 | yes | no  | 2,3   |   | 0.001318    | 109.1  |
| RVM(de)EVNFISYVVMSTAAIPMIKQSNNGSIAVISSIAIGK      | 3911.0723 | IPI0011559€ | IPI0011559€ | yes | no  |       | 5 | 0.012365    | 47.989 |
| RVN(de)ASTTDPNSTVEQSAITR                         | 2146.0614 | IPI0033878€ | IPI0033878€ | yes | no  |       | 3 | 0.0012316   | 89.049 |
| RVNDN(de)KTAAEEAIR                               | 1585.8172 | IPI0040001€ | IPI0040001€ | yes | no  | 2,3   |   | 0.0079686   | 101.43 |
| RVSN(de)ESAAPIVPAVPRPEVDNITIR                    | 2699.4719 | IPI0012228€ | IPI0012228€ | yes | yes |       | 3 | 0.0005193   | 93.73  |
| RVSNESAAPIVPAVPRPEVDN(de)ITIR                    | 2699.4719 | IPI0012228€ | IPI0012228€ | yes | yes |       | 3 | 0.0005193   | 93.73  |
| RYIEIG(de)NETIIR                                 | 1475.8096 | IPI00850057 | IPI00850057 | yes | no  | 2,3   |   | 2.9849E-41  | 199.82 |
| SAEGTFFIN(de)K                                   | 1112.5502 | IPI0012552€ | IPI0012552€ | yes | no  |       | 2 | 0.0019854   | 110.84 |
| SAEGTFFIN(de)KTK                                 | 1341.6929 | IPI0012552€ | IPI0012552€ | yes | no  | 2,3   |   | 0.0017741   | 132.79 |
| SAEN(de)FTVVIK                                   | 1120.6128 | IPI00130271 | IPI00130271 | yes | no  |       | 2 | 7.8137E-07  | 152.07 |
| SAGN(de)MSTYNCCI                                 | 1585.7229 | IPI0013352€ | IPI0013352€ | yes | yes | 2,3   |   | 5.2245E-05  | 135.02 |
| SAVFHRIEGITN(de)ETIR                             | 1891.9541 | IPI0011929€ | IPI0011929€ | yes | no  |       | 2 | 0.0030919   | 98.676 |
| SAVGTISGN(de)SSNVIQIIDAYNSISSEVIIENSKIPDGVNTINYK | 4622.3967 | IPI00132474 | IPI00132474 | yes | yes |       | 5 | 5.6149E-21  | 109.27 |
| SAVSTSWIIPYN(de)HTWSHEK                          | 2242.0807 | IPI0012442€ | IPI0012442€ | yes | yes | 2,3   |   | 9.7406E-26  | 174.39 |
| SCADEGFSTPCAFVAVSGAN(de)GSVIWERPVAQDVAIVK        | 3992.9401 | IPI0041079€ | IPI0041079€ | yes | yes | 3,4   |   | 8.0318E-37  | 147.25 |
| SCAISEIGCPMDIFQHSAFADIN(de)VSQVITPDAFVCR         | 4054.8686 | IPI00113057 | IPI00113057 | yes | yes | 3,4   |   | 0.0021856   | 50.322 |
| SCGECIQAGPNCGWCTN(de)TTFIQEGMPTSAR               | 3389.3992 | IPI00132474 | IPI00132474 | yes | yes | 3,4   |   | 3.6636E-20  | 133.29 |
| SCHTAVGTSEGWNVPMGIYN(de)QTGSCK                   | 2953.3157 | IPI0047108€ | IPI0047108€ | yes | no  | 3,4   |   | 1.3462E-05  | 95.138 |
| SCVAITDAFPQN(de)MSR                              | 1695.7709 | IPI0040574€ | IPI0040574€ | yes | no  | 2,3   |   | 3.8061E-08  | 151.04 |
| SDFSQTMIFQAN(de)TTR                              | 1745.8043 | IPI00114671 | IPI00114671 | yes | no  |       | 2 | 2.3809E-44  | 205.95 |
| SDGIPIAPCGAIANSIFN(de)DSFSIWHQR                  | 2972.4239 | IPI0022185€ | IPI0022185€ | yes | yes | 3,4   |   | 7.8104E-14  | 122.47 |
| SDIIVQTDATNPSVPIDPISVSN(de)SSSQIIK               | 3400.7613 | IPI0012835€ | IPI0012835€ | yes | no  |       | 4 | 0.0011822   | 55.691 |
| SDIN(de)CSVMEATEEK                               | 1611.6756 | IPI0013001€ | IPI0013001€ | yes | no  |       | 2 | 9.8235E-11  | 157.8  |
| SDINPAN(de)GSYPFQAIHQ                            | 2013.9657 | IPI0016573€ | IPI0016573€ | yes | yes | 2,3   |   | 3.1938E-89  | 231.37 |
| SEEIEFIGN(de)SSIR                                | 1479.7205 | IPI0032061€ | IPI0032061€ | yes | yes |       | 2 | 9.5989E-05  | 143.94 |
| SEHIVN(de)FTVK                                   | 1172.619  | IPI00330481 | IPI00330481 | yes | yes | 2,3   |   | 0.000315    | 119.53 |
| SEYQK(de)WECKNDTIFGIK                            | 2145.0201 | IPI0012618€ | IPI0012618€ | yes | yes | 2,3   |   | 6.9887E-48  | 207.92 |
| SFDCCGIFN(de)ITTIR                               | 1702.7807 | IPI0013218€ | IPI0013218€ | yes | yes | 2,3   |   | 8.4402E-08  | 155.66 |
| SFIISIAIHDN(de)HTHSDIQVK                         | 2345.2128 | IPI00130624 | IPI00130624 | yes | yes | 2,3,4 |   | 3.0374E-23  | 166.57 |
| SFMVN(de)WTQSPGKVEK                              | 1736.8556 | IPI0033063€ | IPI0033063€ | yes | no  | 2,3   |   | 1.8181E-43  | 200.77 |
| SFMVN(de)WTQSPGKVEKYR                            | 2056.02   | IPI0033063€ | IPI0033063€ | yes | no  |       | 3 | 0.0017328   | 102.28 |
| SFPVYIN(de)GSTVPSPVK                             | 1690.893  | IPI0022993€ | IPI0022993€ | yes | no  |       | 2 | 6.8053E-11€ | 170.11 |
| SFQQSHVHVHDIQSFIDNIN(de)MTHYIK                   | 3194.5356 | IPI0062655€ | IPI0062655€ | yes | no  | 3,4   |   | 1.8656E-59  | 192.57 |
| SFSGIIDCGN(de)CSR                                | 1471.6184 | IPI0062679€ | IPI0062679€ | yes | no  |       | 2 | 1.7861E-06  | 152.16 |
| SFTVN(de)WTPPAGDWEHYR                            | 2061.9333 | IPI0022993€ | IPI0022993€ | yes | no  |       | 3 | 0.0030745   | 83.966 |
| SFWYHDMDDPKGHIIAQVA(de)TNPQGITGTGNTTSEMDPSHR     | 4524.0863 | IPI0032137€ | IPI0032137€ | yes | no  |       | 4 | 2.3845E-07  | 67.064 |
| SGDASIN(de)VTNIQISDIGTYQCK                       | 2383.1326 | IPI0027037€ | IPI0027037€ | yes | no  | 2,3   |   | 6.7388E-17€ | 276.26 |
| SGNIEHPEDKIFN(de)TSVEVIPFDNPQSEKEAIQEGR          | 3952.9079 | IPI0033621€ | IPI0033621€ | yes | yes |       | 4 | 1.9007E-05  | 71.085 |
| SGQEDHYWIDVEKN(de)QSAK                           | 2132.9763 | IPI0031950€ | IPI0031950€ | yes | no  | 2,3,4 |   | 2.3765E-10€ | 248.1  |
| SGQVEVN(de)ITEFPYTPPEHGR                         | 2357.1288 | IPI0031140€ | IPI0031140€ | yes | yes |       | 3 | 7.8516E-12  | 141.64 |
| SGSGIVGQQIEEFIN(de)QSSPFYFWMNGDR                 | 3192.4611 | IPI0032042€ | IPI0032042€ | yes | no  |       | 4 | 0.0001368   | 80.102 |
| SGTIFDNFIITNDEAYAEFGN(de)ETWGVTK                 | 3267.4884 | IPI0012363€ | IPI0012363€ | yes | yes | 3,4   |   | 5.4872E-07  | 104.33 |
| SHGIWN(de)NTVFIFSTDNGGQTR                        | 2350.1091 | IPI0065235€ | IPI0065235€ | yes | no  |       | 3 | 0.0014195   | 84.208 |
| SHPIHSPVN(de)WTSYASSVESTPTK                      | 2511.203  | IPI0012921€ | IPI0012921€ | yes | yes |       | 3 | 2.7474E-08  | 117.38 |
| SIAQYIHSPPVYFVIEEGYN(de)YSSR                     | 2875.3817 | IPI0013260€ | IPI0013260€ | yes | no  |       | 3 | 0.0037427   | 81.48  |
| SIASEPTEKHFFN(de)VSDEIAIVTIVK                    | 2773.4538 | IPI00466371 | IPI01026704 | no  | no  |       | 3 | 1.2096E-34  | 168.78 |
| SIAYINSDSAIEGN(de)YTIR                           | 1985.9694 | IPI0011304€ | IPI0011304€ | yes | no  |       | 3 | 0.0013072   | 92.38  |
| SICINGKWDPEPN(de)CTSK                            | 2004.9033 | IPI0013001€ | IPI0013001€ | yes | no  | 2,3   |   | 0.0002034   | 126.16 |
| SIDAYPVINQAQAMEN(de)HTEVHFQK                     | 2769.3181 | IPI00468674 | IPI00468674 | yes | no  | 3,4   |   | 0.0001904   | 93.371 |
| SIDEEAIKEN(de)NSIHWK                             | 1911.9327 | IPI0012322€ | IPI0012322€ | yes | no  | 2,3,4 |   | 1.0018E-97  | 218.6  |
| SIDNDNYVFTAPYFN(de)K                             | 1906.8737 | IPI0062679€ | IPI0062679€ | yes | no  |       | 2 | 5.0708E-45  | 199.49 |
| SIDNDNYVFTAPYFN(de)KSGPGAYESGIMVSK               | 3270.5179 | IPI0062679€ | IPI0062679€ | yes | no  |       | 4 | 0.039619    | 47.616 |
| SIFGAIPGN(de)R                                   | 1030.556  | IPI0040007€ | IPI0040007€ | yes | yes |       | 2 | 0.0001784   | 132.91 |
| SIGEVN(de)FTATAEAIQSPEICGNK                      | 2435.1639 | IPI0062466€ | IPI0062466€ | yes | yes | 2,3,4 |   | 2.2055E-20€ | 265.41 |
| SIGEVN(de)FTATAEAIQSPEICGNKITEVPAIVHK            | 3522.8028 | IPI0062466€ | IPI0062466€ | yes | yes | 3,4,5 |   | 2.7303E-98  | 216.25 |
| SIGEVN(de)FTATAEAIQSPEICGNKITEVPAIVHKDVTVK       | 4065.1092 | IPI0062466€ | IPI0062466€ | yes | yes | 3,4,5 |   | 7.2953E-11  | 92.449 |
| SIGNVN(de)FSVSAEAQSSSEPCGSEVATVPETGRK            | 3421.6056 | IPI0012322€ | IPI0012322€ | yes | yes | 3,4,5 |   | 9.4747E-18€ | 215.36 |
| SIGPN(de)TCSSNGSSYFIHGPNICYSSIDKINA              | 3834.7982 | IPI00128484 | IPI00128484 | yes | yes |       | 4 | 2.7311E-10  | 90.384 |
| SIGPNTCSSN(de)GSSYFIHGPNICYSSIDKINA              | 3834.7982 | IPI00128484 | IPI00128484 | yes | yes |       | 4 | 2.7311E-10  | 90.384 |
| SIIDHIVGVGRDN(de)VSQPK                           | 2070.097  | IPI0012342€ | IPI0012342€ | yes | no  | 2,3   |   | 3.8946E-25  | 172.93 |
| SIIEFN(de)TTMGCQPSDSQHR                          | 2206.9736 | IPI00308971 | IPI00308971 | yes | yes | 2,3   |   | 6.7329E-42  | 193.19 |
| SIHIGSPTWKN(de)VSR                               | 1669.9515 | IPI0022571€ | IPI0022571€ | yes | yes |       | 3 | 0.0002146   | 107.53 |
| SIW(de)TETFMNKENQNHYSIK                          | 2569.2271 | IPI0012024€ | IPI0012024€ | yes | no  |       | 3 | 6.7197E-05  | 97.095 |
| SIN(de)CTVK                                      | 820.41129 | IPI0041718€ | IPI0041718€ | yes | no  |       | 2 | 1.5624E-17  | 143.61 |
| SIN(de)GTFGGWK                                   | 1212.5928 | IPI0013693€ | IPI0013693€ | yes | yes |       | 2 | 0.009307    | 88.187 |
| SIN(de)VTGQGFSSIQK                               | 1490.8093 | IPI0040574€ | IPI0040574€ | yes | no  | 2,3   |   | 6.4801E-32  | 189.3  |
| SINGVIIPGGGAN(de)ITDSGYSR                        | 2047.0334 | IPI0012924€ | IPI0012924€ | yes | no  |       | 2 | 4.8003E-09  | 133.74 |
| SIPNN(de)VTSFEVESIKPYK                           | 2051.0575 | IPI0032305€ | IPI0032305€ | yes | no  | 2,3   |   | 5.0467E-37  | 191.07 |
| SIPPGIFSTSAN(de)ISTIVIR                          | 1972.0993 | IPI0012925€ | IPI0012925€ | yes | yes | 2,3   |   | 3.2573E-33  | 185.99 |
| SIPQSSWGN(de)WSSWK                               | 1648.7634 | IPI00118291 | IPI00118291 | yes | no  |       | 2 | 0.0031919   | 97.45  |
| SIPVN(de)DSVIDVFER                               | 1588.8097 | IPI0012212€ | IPI0012212€ | yes | no  | 2,3   |   | 4.2187E-11  | 163.71 |
| SIPVN(de)DSVIDVFERR                              | 1744.9108 | IPI0012212€ | IPI0012212€ | yes | no  | 2,3   |   | 4.6922E-06  | 143.93 |
| SIQTSDQQNIKVPGN(de)ITSVIISNIVPR                  | 3021.6459 | IPI00221547 | IPI00221547 | yes | no  |       | 3 | 0.0005254   | 77.241 |
| SISCQMAAFRGN(de)GSER                             | 1769.7937 | IPI00129677 | IPI00129677 | yes | no  | 2,3   |   | 0.0006923   | 121.99 |
| SISPHAGTEPCPEAAVCIIN(de)GSKPVNIGK                | 3099.5481 | IPI00308971 | IPI00308971 | yes | no  | 3,4   |   | 7.3214E-14  | 119.34 |
| SITFN(de)ESYQDVSEVVYGA                           | 2135.0059 | IPI0013664€ | IPI0013664€ | yes | yes | 2,3   |   | 0           | 340.42 |
| SITHDTDGVAVFVINIPSN(de)VTVIK                     | 2538.3694 | IPI0033083€ | IPI0033083€ | yes | yes | 2,3,4 |   | 8.0545E-36  | 177    |
| SITQGSIIVGNIPVN(de)GTSQGK                        | 2140.1488 | IPI0051536€ | IPI0051536€ | yes | no  | 2,3   |   | 8.3264E-19€ | 283.55 |
| SITVIIGAHN(de)K                                  | 1151.6663 | IPI0023042€ | IPI0023042€ | yes | yes |       | 2 | 3.8972E-06  | 147.91 |
| SIYIIN(de)STR                                    | 1065.5819 | IPI0031130€ | IPI0031130€ | yes | yes |       | 2 | 0.016951    | 98.943 |
| SKIDTEVAN(de)ISVMEEMK                            | 2022.0013 | IPI00129304 | IPI00129304 | yes | yes |       | 3 | 3.0143E-60  | 209.89 |
| SKN(de)ITIVEIPDEVIVPR                            | 1921.0884 | IPI0011883€ | IPI0011883€ | yes | yes |       | 3 | 0.0005168   | 120.92 |
| SMAGSGHN(de)VSQEAIAIK                            | 1698.8359 | IPI0031467€ | IPI0031467€ | yes | yes | 2,3   |   | 2.7246E-08  | 142.39 |
| SMAGSGHN(de)VSQEAIAIKR                           | 1854.937  | IPI0031467€ | IPI0031467€ | yes | yes | 2,3   |   | 0.0002614   | 108.71 |
| SMANQIITFN(de)ISSK                               | 1552.7919 | IPI0046760€ | IPI0046760€ | yes | yes | 2,3   |   | 4.1277E-23  | 178.84 |

|                                             |           |             |             |     |     |       |   |             |        |
|---------------------------------------------|-----------|-------------|-------------|-----|-----|-------|---|-------------|--------|
| SMKITYN(de)ESR                              | 1227.5918 | IPI01008227 | IPI01008227 | yes | no  |       | 2 | 0.0034182   | 113.38 |
| SN(de)ISIIR                                 | 801.47085 | IPI00323134 | IPI00323134 | yes | no  |       | 2 | 1.9125E-05  | 111.82 |
| SN(de)ITVIR                                 | 801.47085 | IPI00377953 | IPI00377953 | yes | no  |       | 2 | 0.0086862   | 105.57 |
| SN(de)VTRPSEFNWIPIPIFIK                     | 2491.3264 | IPI00319509 | IPI00319509 | yes | no  | 2,3,4 |   | 5.6682E-30  | 168.64 |
| SN(de)YSVIDITPVAIIPK                        | 1800.0033 | IPI00225072 | IPI00225072 | yes | no  | 2,3   |   | 2.0189E-122 | 254.05 |
| SNIDPSNVDSIFYAAQSSQVISGCEISVSN(de)ETK       | 3545.6468 | IPI00475154 | IPI00475154 | yes | yes | 3,4   |   | 2.5125E-12  | 114.8  |
| SNKYSQ(de)AANSTKEIDDCEQANK                  | 2500.1136 | IPI00187353 | IPI00187353 | yes | yes |       | 4 | 2.7224E-11  | 137.73 |
| SPDKETFTCWNPWPGSDGGIPTN(de)YSITYSK          | 3307.4768 | IPI00321091 | IPI00321091 | yes | no  |       | 3 | 0.0001025   | 89.039 |
| SPFYN(de)ISDQISFQCYDGYVIR                   | 2571.174  | IPI00114065 | IPI00114065 | yes | no  |       | 3 | 0.0050065   | 72.772 |
| SPGAQDN(de)VSQSQGM                          | 1531.7049 | IPI00348586 | IPI00348586 | yes | no  | 2,3   |   | 3.9585E-44  | 203.87 |
| SPMQWDN(de)SSNAGFTEANHTWIPTNSDYHTVNVVDVQK   | 4089.8188 | IPI00128432 | IPI00128432 | yes | yes |       | 4 | 0.0054541   | 44.021 |
| SPMQWDNSSNAGFTEAN(de)HTWIPTNSDYHTVNVVDVQK   | 4089.8188 | IPI00128432 | IPI00128432 | yes | yes |       | 4 | 0.0054541   | 44.021 |
| SPN(de)DSEAWHQK                             | 1297.5687 | IPI00153644 | IPI00153644 | yes | yes | 2,3   |   | 0.01659     | 81.625 |
| SPPAPPQPQPISPIHPIGICN(de)DSEVIAVAGFAIQNINR  | 4042.1211 | IPI00469387 | IPI00469387 | yes | yes |       | 4 | 2.0414E-08  | 79.917 |
| SPVIGQPNTIICFVDNIFPPVIN(de)ITWIR            | 3335.8104 | IPI00172039 | IPI00172039 | yes | no  |       | 4 | 0.0038696   | 56.172 |
| SPVNIGE(de)PNIIICFIDKFSPPVVNVTVIR           | 3323.774  | IPI00110808 | IPI00110808 | yes | no  |       | 4 | 0.010116    | 57.145 |
| SQITISNIDVNDPGTYVCN(de)ATNAQGTTR            | 3108.4782 | IPI00408495 | IPI00408495 | yes | no  | 2,3   |   | 7.3906E-202 | 193.53 |
| SQIVNETHWQY(de)YGTSDTR                      | 2183.9872 | IPI00749655 | IPI00749655 | yes | no  | 2,3   |   | 1.8089E-21  | 173.21 |
| SQN(de)DTVTPDVWYTSKPEKK                     | 2222.0855 | IPI00471238 | IPI00471238 | yes | yes |       | 3 | 1.0355E-05  | 127.3  |
| SQNDKFN(de)VSITVK                           | 1478.7729 | IPI00466371 | IPI01026704 | no  | no  | 2,3   |   | 7.5471E-275 | 225.32 |
| SQSPSIMYTINGFVN(de)K                        | 1784.8767 | IPI00406603 | IPI00406603 | yes | yes | 2,3   |   | 1.303E-25   | 181.51 |
| SR(de)TNITSIIVQPISPSIVK                     | 2052.1943 | IPI00985989 | IPI00985989 | yes | no  |       | 3 | 4.5958E-09  | 144.3  |
| SRYPHKPE(de)INSTTHPGADIK                    | 2247.1396 | IPI00114206 | IPI00114206 | yes | yes | 2,3   |   | 3.9643E-20  | 166.52 |
| SSAN(de)QSEFQQQIQK                          | 1621.7696 | IPI00990932 | IPI00990932 | yes | no  |       | 2 | 4.2063E-16  | 170.49 |
| SSIRN(de)GTEVVVSCHPQGGSTAGVVYR              | 2560.2452 | IPI00674255 | IPI00674255 | yes | yes |       | 3 | 6.2182E-08  | 109.37 |
| SSQSN(de)QTIWFGHFTTSTIMSPSPGIR              | 2866.3708 | IPI00226714 | IPI00226714 | yes | no  |       | 3 | 0.010277    | 64.589 |
| SSSHIPPSSYFN(de)ASGR                        | 1692.7856 | IPI00130661 | IPI00130661 | yes | yes | 2,3   |   | 3.1373E-102 | 247.93 |
| SSSYHENDMENPQSN(de)ITMVYIPIGPK              | 3063.4318 | IPI00406603 | IPI00406603 | yes | yes |       | 3 | 1.9242E-16  | 130.3  |
| SSTEN(de)TSAEIHVIGR                         | 1599.7853 | IPI00330594 | IPI00330594 | yes | yes | 2,3   |   | 1.5187E-70  | 226.93 |
| SSVEIIN(de)STQAPMR                          | 1531.7664 | IPI00120166 | IPI00120166 | yes | yes |       | 2 | 2.7964E-05  | 140.1  |
| STFYTCQVSNPVSSKN(de)DTVYFTIPCDIAR           | 3369.5646 | IPI00109946 | IPI00109946 | yes | yes |       | 3 | 5.1449E-41  | 171.5  |
| STGKPTIYNVSI(de)MSDTGGTCY                   | 2364.0977 | IPI00468055 | IPI00468055 | yes | yes |       | 2 | 1.0652E-222 | 299.71 |
| STIIHHPQYAWIQDIGIREDNEGVYN(de)GSWGR         | 3780.8397 | IPI00230084 | IPI00230084 | yes | no  |       | 4 | 4.3379E-06  | 66.925 |
| STTQTN(de)SSDSHIVK                          | 1503.7165 | IPI00111807 | IPI00111807 | yes | no  | 2,3   |   | 0.0010583   | 109.44 |
| SVAFQDCQVN(de)ITIEGR                        | 1835.8836 | IPI00173181 | IPI00173181 | yes | no  |       | 2 | 5.9126E-86  | 233.37 |
| SVAPCTDFFSFACAN(de)GTSDSFQAITEENK           | 3457.5079 | IPI00111137 | IPI00111137 | yes | yes |       | 4 | 0.01784     | 51.052 |
| SVCDEPEYVN(de)VTAEDIDGAQNSAPFSFSIIDQPPGTAQK | 4195.9168 | IPI00115793 | IPI00115793 | yes | yes |       | 4 | 0.0008917   | 51.975 |
| SVGIPVICIN(de)ATDDVFSHPAIIPIETAK            | 2950.511  | IPI00131173 | IPI00131173 | yes | yes |       | 3 | 1.2338E-13  | 117.21 |
| SVGTGTNMVFQN(de)CSCIGSSGNSSAVIGICK          | 3091.3831 | IPI00625835 | IPI00625835 | yes | no  | 3,4   |   | 8.2061E-36  | 160.88 |
| SVGTGTNMVFQNCSCIGSSGN(de)SSAVIGICK          | 3091.3831 | IPI00625835 | IPI00625835 | yes | no  | 3,4   |   | 8.2061E-36  | 160.88 |
| SVIEN(de)TTSYEEAK                           | 1469.6886 | IPI00125266 | IPI00125266 | yes | yes |       | 2 | 0.0004997   | 125.97 |
| SVIEN(de)TTSYEEAKNTITK                      | 2027.0059 | IPI00125266 | IPI00125266 | yes | yes | 2,3   |   | 3.3605E-123 | 258.9  |
| SVN(de)ISEIIDVYSDGVEIIQIVK                  | 2432.305  | IPI00466999 | IPI00466999 | yes | no  |       | 3 | 4.8646E-208 | 198.49 |
| SVNINFN(de)ITHR                             | 1313.684  | IPI00118291 | IPI00118291 | yes | no  |       | 2 | 0.0005279   | 114.72 |
| SVVHHIN(de)GSTIR                            | 1318.7106 | IPI00758066 | IPI00758066 | yes | no  | 2,3   |   | 0.010059    | 84.718 |
| SVYN(de)CSGEACSGHNR                         | 1696.6682 | IPI00314726 | IPI00314726 | yes | yes | 2,3   |   | 4.697E-44   | 203.11 |
| SWSTVGN(de)CTAAIR                           | 1421.6721 | IPI00128484 | IPI00128484 | yes | yes |       | 2 | 6.3883E-05  | 145.1  |
| SWVQGN(de)ITACGR                            | 1347.6354 | IPI00153389 | IPI00153389 | yes | no  |       | 2 | 0.00125     | 107.99 |
| SYCKNGVN(de)GTGENGR                         | 1611.706  | IPI00132474 | IPI00132474 | yes | yes | 2,3   |   | 6.3484E-08  | 155.66 |
| SYCKNGVN(de)GTGENGRK                        | 1739.8009 | IPI00132474 | IPI00132474 | yes | yes | 2,3   |   | 1.9791E-101 | 247.93 |
| SYIDDRPIQHYIAVSSPTN(de)TTYVVQYAIANITGK      | 3797.9265 | IPI00118674 | IPI00118674 | yes | yes | 3,4   |   | 8.672E-06   | 76.002 |
| SYIDDRPIQHYIAVSSPTNTTYVVQYAIAN(de)ITGK      | 3797.9265 | IPI00118674 | IPI00118674 | yes | yes | 3,4   |   | 8.672E-06   | 76.002 |
| SYIFIYDGNKN(de)STTTDQNFSAK                  | 2614.2187 | IPI0012483C | IPI0012483C | yes | no  | 2,3   |   | 5.0742E-30  | 154.84 |
| SYIFIYDGNKNSTTTDQN(de)FTSAK                 | 2614.2187 | IPI0012483C | IPI0012483C | yes | no  | 2,3   |   | 5.0742E-30  | 154.84 |
| TAADATGIQPIINQFTPAN(de)VSR                  | 2284.1812 | IPI00120245 | IPI00120245 | yes | no  | 2,3   |   | 4.9552E-101 | 235.92 |
| TAASIIWQAYPIIN(de)ISEK                      | 2017.0884 | IPI00115867 | IPI00115867 | yes | yes | 2,3   |   | 2.2573E-28  | 178.51 |
| TADCDDNQPGAICYYPGN(de)ETEEEV                | 2902.1658 | IPI00129253 | IPI00129253 | yes | yes |       | 3 | 0.017511    | 53.998 |
| TADIIQN(de)ITGR                             | 1200.6463 | IPI00112614 | IPI00112614 | yes | yes |       | 2 | 0.0012207   | 107.09 |
| TAFAPPDIPVCIIGN(de)R                        | 1739.9029 | IPI00331175 | IPI00331175 | yes | no  |       | 3 | 1.3234E-05  | 134.21 |
| TAGAN(de)GTSGFVCVDEGGIPIAQR                 | 2324.0855 | IPI00282289 | IPI00282289 | yes | no  | 2,4   |   | 3.3019E-12  | 137.89 |
| TAGWNIPMGIAN(de)QTR                         | 1741.8934 | IPI00323235 | IPI00323235 | yes | yes | 2,3   |   | 1.7705E-07  | 143.97 |
| TAIFPDIIVQGN(de)ASIR                        | 1713.9414 | IPI00124078 | IPI00124078 | yes | yes | 2,3   |   | 4.1489E-13  | 161.91 |
| TAIVQEVHQN(de)FSAWCSQVIR                    | 2372.1695 | IPI00381303 | IPI00381303 | yes | yes | 2,3   |   | 5.4094E-80  | 227.46 |
| TAIWWATDHNTDN(de)TSAIIR                     | 2098.0443 | IPI0016987C | IPI0016987C | yes | yes | 2,3   |   | 5.9652E-65  | 209.23 |
| TAN(de)ETSAEAYNIIR                          | 1664.837  | IPI0040001E | IPI0040001E | yes | no  |       | 3 | 3.1278E-05  | 130.61 |
| TANDAIQDMICDMEGIPQKHN(de)FSHCCGK            | 3276.3879 | IPI00130654 | IPI00130654 | yes | no  |       | 4 | 2.1389E-26  | 150.14 |
| TASVSIN(de)QTEPPK                           | 1370.7042 | IPI0012922C | IPI0012922C | yes | yes |       | 2 | 0.0035498   | 96.591 |
| TASVSIN(de)QTEPPKVR                         | 1625.8737 | IPI0012922C | IPI0012922C | yes | yes | 2,3   |   | 1.9348E-43  | 200.55 |
| TCNPETFPIRN(de)ESIQCPTAR                    | 2390.1107 | IPI0064918E | IPI0064918E | yes | no  |       | 3 | 0.0016708   | 89.468 |
| TCPAGIMGEN(de)NTIVVWK                       | 1789.8491 | IPI0012119C | IPI0012119C | yes | no  | 2,3   |   | 2.6169E-119 | 251.84 |
| TCPIDEFQCN(de)NTICKPIAWK                    | 2494.1443 | IPI00119063 | IPI00119063 | yes | yes | 2,3   |   | 1.7263E-25  | 172.93 |
| TCVSN(de)CTASQFVCK                          | 1660.7007 | IPI00119063 | IPI00119063 | yes | yes | 2,3   |   | 3.7389E-55  | 214.18 |
| TCVSN(de)CTASQFVCKNDK                       | 2017.8656 | IPI00119063 | IPI00119063 | yes | yes |       | 2 | 0.0060977   | 86.367 |
| TDAEIN(de)ETARPISPVPNK                      | 1951.0011 | IPI00408895 | IPI00408895 | yes | yes |       | 2 | 0.0008414   | 97.081 |
| TDDEVVQREEEAIQIDGIN(de)ASQIR                | 2727.3311 | IPI0012952E | IPI0012952E | yes | yes | 2,3,4 |   | 7.5768E-109 | 235.98 |
| TDPANQFEWIENTIN(de)SSIWNK                   | 2506.1765 | IPI00136259 | IPI00136259 | yes | yes |       | 3 | 0.0011933   | 82.765 |
| TDPANQFEWIENTIN(de)SSIWNKEK                 | 2763.314  | IPI00136259 | IPI00136259 | yes | yes |       | 4 | 0.017218    | 65.784 |
| TEAGVFEYVADPTFEN(de)FTGGVK                  | 2377.1114 | IPI00405742 | IPI00405742 | yes | no  | 2,3   |   | 3.1995E-60  | 207.76 |
| TEAGVFEYVADPTFEN(de)FTGGVVK                 | 2505.2064 | IPI00405742 | IPI00405742 | yes | no  | 2,3,4 |   | 1.7508E-86  | 226.57 |
| TEGMIIN(de)VTSSIR                           | 1419.7392 | IPI00109254 | IPI00109254 | yes | yes |       | 2 | 0.0005589   | 121.45 |
| TEIDIRPQGIAIFSN(de)VSEAR                    | 2215.1597 | IPI00122973 | IPI00122973 | yes | no  | 2,3   |   | 4.3876E-33  | 185.85 |
| TEKDPQNDPVGTCYISTEN(de)FTR                  | 2571.1547 | IPI0011597E | IPI0011597E | yes | yes | 2,3   |   | 3.4388E-30  | 168.81 |
| TEQIIQAPN(de)TSVHIYEPYPAGADVPPFPINK         | 3575.83   | IPI0013260C | IPI0013260C | yes | no  | 3,4,5 |   | 1.5745E-99  | 218.86 |
| TEVIIQGTVSPN(de)ASAPDAVWEDYEFK              | 2865.3709 | IPI00405437 | IPI00405437 | yes | no  |       | 4 | 0.0053671   | 61.437 |
| TEVKPVATEQIISTFITVGN(de)NTCFYGK             | 3016.5216 | IPI00122494 | IPI00122494 | yes | yes | 3,4   |   | 2.8267E-13  | 121.39 |
| TEVSNNNVIIYIDQVTN(de)QTIAFSFIQQDIPVR        | 3791.9734 | IPI00123223 | IPI00123223 | yes | yes | 3,4   |   | 1.7618E-49  | 173.59 |



|                                                 |           |             |             |     |     |       |   |             |        |
|-------------------------------------------------|-----------|-------------|-------------|-----|-----|-------|---|-------------|--------|
| TFHETIN(de)CCGSNAITTTITIR                       | 2623.2734 | IPI0031091E | IPI0031091E | yes | no  |       | 3 | 5.7041E-08  | 109.85 |
| TFN(de)VSEDTKVNTPVETQIK                         | 2363.222  | IPI00314132 | IPI00314132 | yes | no  |       | 3 | 0.000124    | 96.391 |
| TFNVSEDTKVN(de)TTVIPETQIK                       | 2363.222  | IPI00314132 | IPI00314132 | yes | no  |       | 3 | 0.000124    | 96.391 |
| TFPGETN(de)VTIQIWESEGR                          | 2062.996  | IPI00355482 | IPI00355482 | yes | yes | 2,3   |   | 5.4825E-06  | 127.29 |
| TGATNTWIFPGSCNGN(de)ETTFWQCK                    | 2776.201  | IPI0076010E | IPI0076010E | yes | no  |       | 3 | 0.0019014   | 76.049 |
| TGDGSN(de)VTSNFTKDPSIIPEIIPGVSYTVK              | 3248.6816 | IPI0046942E | IPI0046942E | yes | no  |       | 3 | 4.2442E-08  | 103.14 |
| TGDGSNVTSN(de)FTKDPSIIPEIIPGVSYTVK              | 3248.6816 | IPI0046942E | IPI0046942E | yes | no  |       | 3 | 4.2442E-08  | 103.14 |
| TGEAN(de)ITQIYTQEAFIQTHAR                       | 2747.3515 | IPI0031009C | IPI0031009C | yes | no  | 3,4   |   | 2.5582E-14  | 257.96 |
| TGEIFTFN(de)TTAAQPQYFK                          | 2063      | IPI00330714 | IPI00330714 | yes | no  |       | 2 | 8.5579E-237 | 302.96 |
| TGEIFTFN(de)TTAAQPQYFKYEPDGVDSVIVK              | 3511.7188 | IPI00330714 | IPI00330714 | yes | no  | 3,4   |   | 3.0056E-40  | 157.9  |
| TGEIN(de)ITSIVDR                                | 1316.6936 | IPI0038046C | IPI0038046C | yes | no  |       | 2 | 3.5456E-06  | 150.22 |
| TGHRPPNPAFWVN(de)GSGTEVK                        | 2336.145  | IPI0022155E | IPI0022155E | yes | no  |       | 3 | 7.7407E-16  | 150.69 |
| TGHTNAHGK(de)DIDTDFTSNASQPETK                   | 2671.211  | IPI0013057E | IPI0013057E | yes | yes |       | 3 | 5.4924E-08  | 108.08 |
| TGTIAIQN(de)TTQIR                               | 1415.7732 | IPI00623114 | IPI00623114 | yes | no  |       | 2 | 2.388E-06   | 150.34 |
| TGVHDGDFEYN(de)ITTTIAANK                        | 2279.107  | IPI0010884E | IPI0010884E | yes | no  |       | 3 | 5.8974E-09  | 130.39 |
| TGVNSGVMIMN(de)MTR                              | 1509.7102 | IPI00856861 | IPI00856861 | yes | no  |       | 2 | 0.0022293   | 95.236 |
| TIAGEN(de)QTAIEIEEINR                           | 1899.9538 | IPI0040001E | IPI0040001E | yes | no  |       | 3 | 1.3668E-10  | 242.19 |
| TIAGEN(de)QTAIEIEEINRK                          | 2028.0487 | IPI0040001E | IPI0040001E | yes | no  |       | 3 | 0.0066237   | 82.59  |
| TIEDIIFRAEN(de)R                                | 1475.7732 | IPI00122312 | IPI00122312 | yes | no  |       | 3 | 0.015607    | 93.096 |
| TIEQERN(de)ASFVYTK                              | 1684.842  | IPI0012322E | IPI0012322E | yes | no  | 2,3   |   | 8.1568E-23  | 182.1  |
| TIGISPFHEFADVFTAN(de)DSGHR                      | 2516.2084 | IPI0012756C | IPI0012756C | yes | yes | 2,3,4 |   | 1.5898E-13E | 245.78 |
| TIIGYYN(de)QSAGGHTIQWMYGCDVGS DGR               | 3206.4186 | IPI0010999E | IPI0010999E | yes | yes |       | 3 | 2.8558E-07  | 105.17 |
| TIIGYYN(de)QSESGSHTIQWMYGCK                     | 2722.2156 | IPI00608044 | IPI00608044 | yes | no  |       | 3 | 1.4351E-31  | 175.33 |
| TIIN(de)TSCDNMIMAIK                             | 1723.8307 | IPI00224654 | IPI00224654 | yes | yes |       | 2 | 0.0002073   | 118.33 |
| TIIPAAAQDVYYRDEIGN(de)VSTSHIIIDDSVEMEIRPR       | 4299.1845 | IPI0030903E | IPI0030903E | yes | yes | 4,5,6 |   | 1.6377E-05  | 65.33  |
| TIISYYN(de)QSAGGSHTIQVISGCEVGS DGR              | 3055.4305 | IPI00474494 | IPI00474494 | yes | no  |       | 3 | 2.4401E-33  | 160    |
| TIIVDN(de)NTWNNTHISR                            | 1896.9442 | IPI0010910E | IPI0010910E | yes | yes | 2,3   |   | 0           | 265.77 |
| TIIVDNNTWN(de)NTHISR                            | 1896.9442 | IPI0010910E | IPI0010910E | yes | yes | 2,3   |   | 0           | 265.77 |
| TIKPNPAKDPVGTVCYVAIQN(de)FSAYAEHSPCR            | 3490.6762 | IPI00345112 | IPI00345112 | yes | no  | 4,5   |   | 4.2095E-06  | 84.529 |
| TIMS A EANIAGIFPPNEVQHFNPN(de)ISWQPIPVHTVPITEDR | 4579.2958 | IPI0015405E | IPI0015405E | yes | no  | 4,5   |   | 1.2566E-25  | 121.1  |
| TIN(de)WSAAEPGAWATK                             | 1601.7838 | IPI0033144C | IPI0033144C | yes | no  | 2,3   |   | 2.77E-06    | 143.28 |
| TIPHHQYN(de)ATINK                               | 1535.7845 | IPI0034826E | IPI0034826E | yes | yes |       | 2 | 0.00879     | 84.173 |
| TIPHPDITHIPPPSPPTIN(de)NTSISR                   | 2788.4508 | IPI0040660E | IPI0040660E | yes | yes |       | 3 | 1.3952E-05  | 88.09  |
| TIPHPDITHIPPPSPPTINN(de)TSISR                   | 2788.4508 | IPI0040660E | IPI0040660E | yes | yes |       | 3 | 1.3952E-05  | 88.09  |
| TISDVPSAAPQN(de)ISIEVR                          | 1895.9953 | IPI0012915E | IPI0012915E | yes | no  | 2,3   |   | 2.2644E-48  | 203.53 |
| TITIIN(de)VTR                                   | 1029.6182 | IPI0010853E | IPI0010853E | yes | no  |       | 2 | 5.2923E-07  | 155.11 |
| TITIIN(de)VTRNDTGPYVCETR                        | 2322.1638 | IPI0010853E | IPI0010853E | yes | no  | 2,3   |   | 8.2546E-65  | 212.72 |
| TITIINVTRN(de)DTGPYVCETR                        | 2322.1638 | IPI0010853E | IPI0010853E | yes | no  | 2,3   |   | 8.2546E-65  | 212.72 |
| TITVYN(de)FSAPVITISQIEVSEGSQVTVK                | 3009.591  | IPI0012297E | IPI0012297E | yes | no  | 3,4   |   | 1.3737E-90  | 217.65 |
| TIYN(de)WSGYPIIVHK                              | 1689.8879 | IPI00471081 | IPI00471081 | yes | yes | 2,3   |   | 6.9089E-11  | 161.04 |
| TKQHGFQFSIAVVGIN(de)ITSIGIR                     | 2338.3121 | IPI0012119C | IPI0012119C | yes | no  |       | 3 | 1.3603E-07  | 120.4  |
| TKTQVFGPVDPT(de)VNTTYAFFNTFFK                   | 2869.4327 | IPI0011553C | IPI0011553C | yes | yes | 3,4   |   | 4.8699E-56  | 192.27 |
| TMVFPVMIYN(de)ESVIIDK                           | 1998.0206 | IPI00127447 | IPI00127447 | yes | yes | 2,3   |   | 7.1031E-12  | 155.2  |
| TMVFPVMIYN(de)ESVIIDKETANQIK                    | 2782.4285 | IPI00127447 | IPI00127447 | yes | yes | 3,4   |   | 2.5472E-16  | 145.43 |
| TN(de)HTVMTMGSDFH YENANMWFK                     | 2660.1246 | IPI0038130E | IPI0038130E | yes | yes |       | 3 | 0.012601    | 59.585 |
| TN(de)ITSIIVQPISPSIVK                           | 1809.0612 | IPI0098598E | IPI0098598E | yes | no  |       | 3 | 2.5858E-05  | 127.83 |
| TN(de)KSEMWDVFCYR                               | 1734.7494 | IPI0046760C | IPI0046760C | yes | no  |       | 3 | 0.010711    | 95.417 |
| TN(de)SSFIQGFVDHVK                              | 1577.7838 | IPI0032119C | IPI0032119C | yes | no  | 2,3   |   | 2.0044E-23  | 183.96 |
| TN(de)SSFIQGFVDHVKEDCDR                         | 2253.012  | IPI0032119C | IPI0032119C | yes | no  | 3,4   |   | 0.0001145   | 114.52 |
| TN(de)SSFIQGFVDHVKEDCDRIGPGVSDICK               | 3279.5289 | IPI0032119C | IPI0032119C | yes | no  | 3,4   |   | 3.418E-09   | 113.6  |
| TNIEGQVPFIPAN(de)FTAHTPYK                       | 2457.2692 | IPI0012990E | IPI0012990E | yes | yes |       | 3 | 7.8055E-23  | 162.42 |
| TNIEGQVPFIPAN(de)FTAHTPYKEYFYHR                 | 3352.6669 | IPI0012990E | IPI0012990E | yes | yes | 3,4   |   | 0.0001679   | 88.836 |
| TNQ(de)SCEIVIDSTEVNPSYIGR                       | 2509.2119 | IPI0031005E | IPI0031005E | yes | no  |       | 3 | 0.0001371   | 95.414 |
| TPASDPHGDN(de)ITYSVFYTK                         | 2111.98   | IPI0012915E | IPI0012915E | yes | no  | 2,3   |   | 6.4114E-05  | 103.88 |
| TPIHYFDSQCMGAMHWQVMHN(de)VTTETK                 | 3248.43   | IPI0034983C | IPI0034983C | yes | no  |       | 4 | 0.0079914   | 52.79  |
| TPTIPPVSFHIGGVWFN(de)ITGQDYVIK                  | 2885.5116 | IPI00113797 | IPI00113797 | yes | yes | 3,4   |   | 4.6568E-21  | 148.04 |
| TQDSIIQAETQANSCN(de)ITVVTIQESIEK                | 3119.5292 | IPI00321222 | IPI00321222 | yes | yes |       | 3 | 6.1517E-05  | 88.413 |
| TQDSIIQAETQANSCN(de)ITVVTIQESIEKK               | 3247.6242 | IPI00321222 | IPI00321222 | yes | yes | 3,4   |   | 3.9934E-51  | 182.67 |
| TQITCSIN(de)SSGVDIVGHR                          | 1942.9531 | IPI0040849E | IPI0040849E | yes | no  | 2,3   |   | 1.0071E-21C | 298.93 |
| TQMVFFN(de)ITPNIINDTMEIR                        | 2396.1868 | IPI0012785E | IPI0012785E | yes | yes | 2,3   |   | 2.9686E-42  | 192.25 |
| TQMVFFNITPNIIN(de)DTMEIR                        | 2396.1868 | IPI0012785E | IPI0012785E | yes | yes | 2,3   |   | 2.9686E-42  | 192.25 |
| TQVFGPVDPTVN(de)TTYAFFNTFFK                     | 2640.29   | IPI0011553C | IPI0011553C | yes | yes | 2,3   |   | 4.831E-60   | 204.21 |
| TQYACPPFN(de)VTECSVQDAAGNSIDISSIR               | 3286.4871 | IPI00308971 | IPI00308971 | yes | yes |       | 3 | 0.0005711   | 63.893 |
| TSDTGEEEAITN(de)STEANGK                         | 1952.8447 | IPI0040849E | IPI0040849E | yes | no  | 2,3   |   | 8.8236E-30C | 328.92 |
| TSDTGEEEAITN(de)STEANGKYVVVSTPEK                | 2955.3833 | IPI0040849E | IPI0040849E | yes | no  | 3,4   |   | 8.7055E-10E | 229.1  |
| TSIDIWMHTDPMSQKN(de)ESVK                        | 2346.0984 | IPI00118674 | IPI00118674 | yes | yes |       | 3 | 0.0013559   | 89.484 |
| TSIDWWTTDTCNMIN(de)GTDGDSFHPIISK                | 3211.4227 | IPI00127447 | IPI00127447 | yes | yes |       | 3 | 1.1316E-63  | 197.92 |
| TSIDWWTTDTCNMIN(de)GTDGDSFHPIISKDEVIIYIFPSDICR  | 4819.188  | IPI00127447 | IPI00127447 | yes | yes |       | 4 | 0.04434     | 38.376 |
| TSIIVIN(de)NTESNIEDFIQSIK                       | 2377.2377 | IPI0017014E | IPI0017014E | yes | yes | 2,3   |   | 6.0994E-17E | 260.24 |
| TSPFSIN(de)DSVIIIEIAYNPAK                       | 2436.206  | IPI0039675E | IPI0039675E | yes | no  |       | 3 | 2.0808E-05  | 98.443 |
| TSRPTDNSIN(de)VTCGPPYETNGPK                     | 2504.1602 | IPI0032305E | IPI0032305E | yes | no  |       | 3 | 1.6456E-08  | 126.26 |
| TSSEFCQPVS IHGSN(de)HTSK                        | 2101.9487 | IPI00894972 | IPI00894972 | yes | no  |       | 3 | 2.5778E-06  | 128.99 |
| TSYCN(de)ESFYFICK                               | 1717.7116 | IPI0012618E | IPI0012618E | yes | yes | 2,3   |   | 6.6804E-42  | 201.48 |
| TSYCN(de)ESFYFICKK                              | 1845.8066 | IPI0012618E | IPI0012618E | yes | yes | 2,3   |   | 0.0003616   | 116.84 |
| TTIVDN(de)NTWNNSHIAIVGK                         | 2096.0651 | IPI0031646E | IPI0031646E | yes | yes | 2,3   |   | 0           | 360.07 |
| TTIVDNNTWN(de)NSHIAIVGK                         | 2096.0651 | IPI0031646E | IPI0031646E | yes | yes | 2,3   |   | 0           | 360.07 |
| TTPIQIN(de)ETENTEQDDIPADCSAVYNR                 | 3190.4361 | IPI0012820E | IPI0012820E | yes | yes |       | 4 | 0.0001484   | 80.082 |
| TTVKN(de)ITVIEPVTQPFIVTNTTVK                    | 2770.548  | IPI0010853E | IPI0010853E | yes | no  | 2,3,4 |   | 8.3591E-45  | 186.13 |
| TTVKNITVIEPVTQPFIVTN(de)TTVK                    | 2770.548  | IPI0010853E | IPI0010853E | yes | no  | 2,3,4 |   | 8.3591E-45  | 186.13 |
| TVAN(de)JSGCEATDSEAIHCIR                        | 2316.0838 | IPI0015404E | IPI0015404E | yes | yes | 2,3,4 |   | 0           | 264.03 |
| TVDKSTGKPTIYN(de)VSIIIMSDTGTCY                  | 2807.3357 | IPI0046805E | IPI0046805E | yes | yes |       | 3 | 1.38E-56    | 195.39 |
| TVIDKNGDAYGYNN(de)DSIK                          | 2034.9535 | IPI00471081 | IPI00471081 | yes | yes | 2,3   |   | 5.1554E-28  | 183.7  |
| TVNSIN(de)VSAISIEHDEADDISDENREK                 | 3096.4483 | IPI0012137E | IPI0012137E | yes | no  |       | 3 | 2.455E-51   | 186.92 |
| TVSTIVQAAN(de)VSAIYK                            | 1776.9986 | IPI0012432E | IPI0012432E | yes | no  | 2,3   |   | 1.3695E-68  | 174.59 |
| TVVAPSTEGGIN(de)ITSTFIR                         | 1962.0422 | IPI00114252 | IPI00114252 | yes | no  | 2,3   |   | 1.6176E-13  | 148.38 |
| TVVQYSPNIIFSGIEIQKDSCESNQN(de)ITCR              | 3628.7138 | IPI00466371 | IPI00466371 | no  | no  | 3,4   |   | 6.8054E-22  | 128.17 |

|                                            |           |                         |     |     |         |               |        |
|--------------------------------------------|-----------|-------------------------|-----|-----|---------|---------------|--------|
| TVVTEAGNIIKDN(de)ATQEEIIHYIEK              | 2827.4604 | IPI0032119C IPI0032119C | yes | no  | 2,3,4   | 2.4056E-20€   | 284.98 |
| TWSPPFESDDSQKHN(de)QSEYDDSASECCSCP         | 3677.4253 | IPI0012835E IPI0012835E | yes | no  |         | 4 9.4937E-05  | 71.882 |
| TYADDVNSEIVNIYTFN(de)HTVTR                 | 2571.2241 | IPI00330714 IPI00330714 | yes | no  | 2,3     | 1.1852E-197   | 284.65 |
| TYAVYDIFDTAMINN(de)SR                      | 1992.9251 | IPI0022679C IPI0022679C | yes | no  |         | 3 2.7404E-28  | 185.67 |
| TYCANEPISN(de)CSQVNR                       | 1911.8203 | IPI0012777C IPI0012777C | yes | yes |         | 2 0.0015314   | 102.08 |
| TYCANEPISNCSQVN(de)R                       | 1911.8203 | IPI0012777C IPI0012777C | yes | yes |         | 2 0.0015314   | 102.08 |
| TYEN(de)GSSVEYR                            | 1303.5681 | IPI00122117 IPI00122117 | yes | yes |         | 2 0.0036736   | 99.215 |
| TYNVIDMKN(de)TTCQDIQIEVK                   | 2412.1665 | IPI00131091 IPI00131091 | yes | no  |         | 3 1.2623E-32  | 180.64 |
| VAEVEN(de)GTKPDSVPEHCIDTWSFDAATMDHNGTMIFFK | 4410.9508 | IPI00128484 IPI00128484 | yes | yes |         | 4 7.0367E-40  | 110.43 |
| VAEVENGTKPDSVPEHCIDTWSFDAATMDHN(de)GTMIFFK | 4410.9508 | IPI00128484 IPI00128484 | yes | yes |         | 4 7.0367E-40  | 110.43 |
| VAGIIVIN(de)YSNDYNHWIATK                   | 2290.1746 | IPI0011190E IPI0011190E | yes | no  | 2,3     | 1.1135E-25    | 173.98 |
| VAN(de)ITVVVNSIDGK                         | 1427.7984 | IPI00310797 IPI00310797 | yes | yes |         | 2 1.8642E-11  | 166.04 |
| VAQPGINYAIGTN(de)TSYPNNIIR                 | 2375.2234 | IPI0022636C IPI0022636C | yes | no  | 2,3     | 1.4232E-48    | 193.8  |
| VCIPRDPCITNFGGCPN(de)STFCIYR               | 2990.3296 | IPI0098726E IPI0098726E | yes | no  |         | 3 4.0005E-57  | 198.24 |
| VCNGIG(de)IGEFKDTISINATNIK                 | 2363.2155 | IPI0012119C IPI0012119C | yes | no  |         | 3 3.7155E-22  | 162.42 |
| VDEMPQHAVISGNIFINNIN(de)KTDNGTYR           | 3371.6205 | IPI0085672E IPI0085672E | yes | no  | 3,4     | 4.2789E-05    | 91.416 |
| VDEMPQHAVISGNIFINNINKTDN(de)GTYR           | 3371.6205 | IPI0085672E IPI0085672E | yes | no  | 3,4     | 4.2789E-05    | 91.416 |
| VDFIWHPEVN(de)GSMK                         | 1657.7923 | IPI0038029E IPI0038029E | yes | yes |         | 3 0.0039232   | 92.856 |
| VDIEDFEN(de)NTAYAK                         | 1627.7366 | IPI0055116E IPI0055116E | yes | no  |         | 2 9.8875E-13€ | 266.2  |
| VDIPQQPMGIIAVANDTN(de)SCEISPCR             | 2884.3517 | IPI0011906E IPI0011906E | yes | yes | 3,4     | 7.6468E-13    | 123.32 |
| VDIPQQPMGIIAVANDTN(de)SCEISPCR             | 2884.3517 | IPI0011906E IPI0011906E | yes | yes | 3,4     | 7.6468E-13    | 123.32 |
| VDIVIVAN(de)ITVTDKQPHTPAWNAAYR             | 2893.4723 | IPI00323134 IPI00323134 | yes | no  | 3,4     | 2.1293E-08    | 111.6  |
| VEFDDKGNVITSYGNPIIIN(de)SSIPEDATIK         | 3248.6453 | IPI00122257 IPI00122257 | yes | no  | 3,4     | 9.6655E-14    | 116.99 |
| VEN(de)GSETGPIPEIQPIIEGEVK                 | 2431.2482 | IPI00136012 IPI00136012 | yes | yes |         | 3 3.6885E-08  | 114.75 |
| VETGVIKPGMVVTFAPVN(de)VTTEVK               | 2514.3767 | IPI00307837 IPI00307837 | yes | yes | 2,3,4   | 8.5352E-16    | 142.04 |
| VFDIHQNMGSVN(de)VSVGCTPAQIIETSR            | 2958.4328 | IPI0011691E IPI0011691E | yes | no  |         | 3 1.4822E-38  | 175.42 |
| VFGSQN(de)ITTVK                            | 1192.6452 | IPI0012334E IPI0012334E | yes | yes |         | 2 1.2347E-41  | 203.51 |
| VFHIHN(de)ESWVIITPK                        | 1818.9781 | IPI0022475E IPI0022475E | yes | yes | 2,3     | 9.9846E-85    | 232.5  |
| VFIVPVGN(de)HSNIPFSR                       | 1781.9577 | IPI0022141E IPI0022141E | yes | no  | 2,3     | 2.35E-57      | 209.6  |
| VFKPQSGADAIN(de)DSQDFPFETPAK               | 2705.2973 | IPI0046246E IPI0046246E | yes | no  | 3,4     | 1.6003E-161   | 261.26 |
| VFKTN(de)STQVSDVR                          | 1479.7682 | IPI0046942E IPI0046942E | yes | no  | 2,3     | 0.001595      | 119.88 |
| VFNGKDN(de)ISK                             | 1120.5877 | IPI00331214 IPI00331214 | yes | yes |         | 2 0.0013733   | 123.51 |
| VFPYISAMVNN(de)GSISYDHER                   | 2298.0739 | IPI0083035E IPI0083035E | yes | no  | 2,3,4   | 1.732E-05     | 111.57 |
| VFPYISVMVNN(de)GSISYDHSK                   | 2256.0885 | IPI00321634 IPI00321634 | yes | yes | 2,3,4   | 1.8256E-33    | 185.33 |
| VFPYISVMVNN(de)GSISYDHSKDGR                | 2584.238  | IPI00321634 IPI00321634 | yes | yes | 2,3,4,5 | 1.7499E-07    | 107.72 |
| VFVYTPPTN(de)YTIR                          | 1573.814  | IPI0012442E IPI0012442E | yes | yes |         | 2 0.0025397   | 108.56 |
| VGAFFGIFNVAVMN(de)ISGNCIR                  | 2285.1449 | IPI00988164 IPI00988164 | yes | no  |         | 3 2.401E-62   | 152.32 |
| VGFTGTMPATN(de)VSIFINNTQISDTGTYQCIVNNIPDR  | 4057.9514 | IPI00172354 IPI00172354 | yes | no  |         | 4 1.5754E-12  | 98.94  |
| VGFTGTMPATNVSIFIN(de)NTQISDTGTYQCIVNNIPDR  | 4057.9514 | IPI00172354 IPI00172354 | yes | no  |         | 4 1.5754E-12  | 98.94  |
| VGIVTYSN(de)ETR                            | 1237.6303 | IPI0085510E IPI0085510E | yes | no  |         | 2 0.009307    | 88.187 |
| VGNVECGEGHFCHDN(de)QTCKK                   | 2406.9198 | IPI0012464C IPI0012464C | yes | yes |         | 3 9.867E-07   | 130.11 |
| VGQPEIKPMRN(de)ECNSEESSCPFR                | 2750.2211 | IPI00111794 IPI00111794 | yes | no  |         | 3 0.018334    | 66.325 |
| VGVNKN(de)QTVTATFGYPPFR                    | 1998.0323 | IPI0011425E IPI0011425E | yes | no  | 2,3,4   | 3.8778E-74    | 220.64 |
| VHGPN(de)ASHYTSIMTMITWER                   | 2330.0936 | IPI00169617 IPI00169617 | yes | yes |         | 3 5.9334E-05  | 97.095 |
| VHSGN(de)FSTIPQYFK                         | 1623.8045 | IPI01023131 IPI01023131 | yes | no  |         | 2 0.0144      | 77.42  |
| VIDIWDIAQSAN(de)FTEK                       | 1848.9258 | IPI00469307 IPI00469307 | yes | no  | 2,3     | 1.5685E-09    | 153.75 |
| VIEEFYN(de)QTNWHR                          | 1734.8114 | IPI00308691 IPI00308691 | yes | no  |         | 3 0.003539    | 96.64  |
| VIEPKN(de)VSCETR                           | 1559.7614 | IPI00118291 IPI00118291 | yes | no  |         | 2 0.0014367   | 116.51 |
| VIENEKFDTHEYHN(de)ESR                      | 2145.9716 | IPI0046349E IPI0046349E | yes | yes |         | 3 0.0010962   | 110.35 |
| VIETIPAN(de)YSINSSK                        | 1634.8516 | IPI0048053E IPI0048053E | yes | no  | 2,3     | 3.4477E-05    | 129.77 |
| VIFKN(de)YSINDATITIHNGFSDSGK               | 2753.4024 | IPI00471187 IPI00471187 | yes | no  |         | 3 1.2959E-161 | 263.09 |
| VIFYKDDAMVYN(de)VTSR                       | 1919.9451 | IPI00406901 IPI00406901 | yes | no  | 2,3     | 3.9913E-09    | 154.07 |
| VIIIGN(de)ESCTITISESTTNTIK                 | 2280.1519 | IPI0013042C IPI0013042C | yes | no  |         | 3 7.1494E-09  | 128.99 |
| VIIIDPAISGN(de)ETEPYPAFTR                  | 2415.2686 | IPI0084869E IPI0084869E | yes | yes | 2,3,4   | 2.7099E-101   | 237.76 |
| VIIN(de)ITVAANHGTYK                        | 1713.9414 | IPI0046760C IPI0046760C | yes | no  | 2,3     | 5.0063E-05    | 130.47 |
| VIIQSQPIGTIKHN(de)MTYFCK                   | 2490.3127 | IPI0010800E IPI0010800E | yes | no  | 3,4     | 0.0072142     | 76.713 |
| VIIRPYITPNNQGIYIFQGN(de)STVR               | 2762.4868 | IPI0031950E IPI0031950E | yes | yes | 2,3,4   | 1.4292E-79    | 211.17 |
| VIKDAVNN(de)ITAK                           | 1284.7402 | IPI0062679E IPI0062679E | yes | no  |         | 3 0.011952    | 101.89 |
| VIN(de)DTWAWK                              | 1131.5713 | IPI0012334E IPI0012334E | yes | yes |         | 2 0.027883    | 91.584 |
| VIN(de)DTWAWKNATIAEQAK                     | 2058.0534 | IPI0012334E IPI0012334E | yes | yes |         | 2 5.552E-123  | 258.9  |
| VIN(de)ITDNTYFK                            | 1326.682  | IPI00130117 IPI00130117 | yes | yes |         | 2 0.0065639   | 92.866 |
| VINADQGSATVQMIIN(de)DTCPIFVR               | 2762.3731 | IPI0032006E IPI0032006E | yes | yes | 2,3,4   | 1.9915E-45    | 185.71 |
| VINDTWAWKN(de)ATIAEQAK                     | 2058.0534 | IPI0012334E IPI0012334E | yes | yes |         | 2 5.552E-123  | 258.9  |
| VINEECKEN(de)ESINIAAR                      | 1987.9633 | IPI00122411 IPI00122411 | yes | yes |         | 2 2.2117E-27  | 180.88 |
| VIPFN(de)VTDYCQIVR                         | 1722.8763 | IPI0082822E IPI0082822E | yes | no  | 2,3     | 1.9393E-11€   | 251.3  |
| VIPSSQPPISCSEEGVGN(de)ATISVPMGEECVR        | 3285.5316 | IPI0089537E IPI0089537E | yes | no  |         | 4 5.063E-05   | 69.284 |
| VIQVVN(de)VTK                              | 998.61243 | IPI0035548E IPI0035548E | yes | yes |         | 2 0.0057508   | 109.66 |
| VISIAQAHSIN(de)FSCEQVR                     | 2058.0317 | IPI0030899C IPI0030899C | yes | yes | 2,3     | 4.7892E-06    | 132.13 |
| VISN(de)NCTSYGVIDIGK                       | 1738.856  | IPI00331214 IPI00331214 | yes | yes | 2,3     | 8.6124E-26    | 184.22 |
| VISNN(de)CTSYGVIDIGK                       | 1738.856  | IPI00331214 IPI00331214 | yes | yes | 2,3     | 8.6124E-26    | 184.22 |
| VITIAN(de)FTTK                             | 1106.6336 | IPI00109727 IPI00109727 | yes | yes |         | 2 0.033601    | 77.64  |
| VITIAN(de)FTTKDEGDYFCEIQVSGANPMSSNK        | 3435.5963 | IPI00109727 IPI00109727 | yes | yes |         | 4 6.5437E-08  | 97.94  |
| VITIANFTTKDEGDYFCEIQVSGANPMSSN(de)K        | 3435.5963 | IPI00109727 IPI00109727 | yes | yes |         | 4 6.5437E-08  | 97.94  |
| VITMANQVITVN(de)ISEEGR                     | 1973.0252 | IPI0098726E IPI0098726E | yes | yes |         | 3 1.5899E-16  | 166.48 |
| VITNQESPYQN(de)HTGR                        | 1742.8336 | IPI0012531C IPI0012531C | yes | no  | 2,3     | 4.5903E-18    | 177.04 |
| VIVAPPSEAN(de)TTK                          | 1454.7617 | IPI0087541E IPI0087541E | yes | no  |         | 2 0.0091963   | 82.102 |
| VIVIITDGEASDKGN(de)ISAAHDITR               | 2494.3027 | IPI0089497E IPI0089497E | yes | no  |         | 3 3.3119E-05  | 101.64 |
| VIVPPAPPSCSIQGVYVGTN(de)VTINCK             | 2866.4721 | IPI00126827 IPI00126827 | yes | no  | 3,4     | 5.3763E-09    | 109.85 |
| VIYIPAYN(de)CTIRPVSK                       | 1893.0182 | IPI00469387 IPI00469387 | yes | no  |         | 3 0.0029863   | 99.531 |
| VKN(de)STCIDDSWIHPK                        | 1798.8672 | IPI00122584 IPI00122584 | yes | yes |         | 3 6.5593E-08  | 153.81 |
| VKPTPPYN(de)ISVTNSEEISSIHK                 | 2415.2897 | IPI0012015E IPI0012015E | yes | yes |         | 3 3.2659E-22  | 159.95 |
| VMSWWDYGYQIAGMAN(de)R                      | 2046.908  | IPI0031646E IPI0031646E | yes | yes | 2,3     | 4.8519E-28    | 182.57 |
| VMSWWDYGYQITAMAN(de)R                      | 2090.9343 | IPI0010910E IPI0010910E | yes | yes | 2,3     | 4.4559E-22    | 177.84 |
| VN(de)GTDIAPDIINGSQIIIR                    | 2008.0953 | IPI0013169E IPI0013169E | yes | no  |         | 3 3.0583E-06  | 131.25 |
| VN(de)GTITQVIVGAPTHDDVSK                   | 2163.1535 | IPI0022571E IPI0022571E | yes | yes | 2,3     | 1.7238E-48    | 192.62 |
| VN(de)ISFPSAQSIASDTHIK                     | 2011.0375 | IPI0062466E IPI0062466E | yes | yes | 2,3     | 3.7963E-94    | 237.3  |

|                                            |           |             |             |     |     |       |   |             |        |
|--------------------------------------------|-----------|-------------|-------------|-----|-----|-------|---|-------------|--------|
| VN(de)ITVIPSITSR                           | 1298.7558 | IPI00323857 | IPI00323857 | yes | no  |       | 2 | 0.0007722   | 114.24 |
| VN(de)KTEEDYAR                             | 1223.5782 | IPI00133103 | IPI00133103 | yes | no  | 2,3   |   | 0.0006336   | 130.01 |
| VN(de)KTEEDYARDSIFVR                       | 1940.9592 | IPI00133103 | IPI00133103 | yes | no  |       | 2 | 0.0024844   | 106.3  |
| VN(de)SSIHSQISR                            | 1226.6367 | IPI0040001E | IPI0040001E | yes | no  |       | 2 | 0.0045714   | 96.604 |
| VNCEERN(de)VTGIENFTIK                      | 2021.984  | IPI00378224 | IPI00378224 | yes | yes | 2,3   |   | 3.1557E-36  | 192.24 |
| VNCEERNVTGIEN(de)FTIK                      | 2021.984  | IPI00378224 | IPI00378224 | yes | yes | 2,3   |   | 3.1557E-36  | 192.24 |
| VNDNK(de)TAAEEAIR                          | 1429.7161 | IPI0040001E | IPI0040001E | yes | no  |       | 2 | 0.0014269   | 131.32 |
| VNGTDIAPDIIN(de)GSQIIIR                    | 2008.0953 | IPI00131693 | IPI00131693 | yes | no  |       | 3 | 3.0583E-06  | 131.25 |
| VNRFN(de)STEYQVVTR                         | 1711.8642 | IPI00119063 | IPI00119063 | yes | no  | 2,3   |   | 0.0003123   | 126.71 |
| VNYEGGTWDWIAEAISSN(de)HTR                  | 2405.1036 | IPI0013458E | IPI0013458E | yes | yes |       | 3 | 1.4842E-22  | 161.47 |
| VPFIFNINPATTN(de)FTGSCQPQSAQIR             | 2907.4338 | IPI00222967 | IPI00222967 | yes | no  | 3,4   |   | 8.892E-47   | 188.24 |
| VPIHCTN(de)GSVVYHEVINAMQCR                 | 2583.2145 | IPI0079857E | IPI0079857E | yes | yes |       | 3 | 0.0072084   | 67.644 |
| VPMMVQSGN(de)ISYFR                         | 1627.7851 | IPI0011610E | IPI0011610E | yes | yes |       | 3 | 3.7284E-05  | 136.3  |
| VPNNAIEGIEN(de)ITAIYIHHNEIQEVGSSMR         | 3347.6568 | IPI00120187 | IPI00120187 | yes | yes | 3,4,5 |   | 3.817E-15   | 125.54 |
| VPSN(de)STETVIESDQFQPGVR                   | 2189.06   | IPI0011929E | IPI0011929E | yes | no  |       | 3 | 1.452E-09   | 141.18 |
| VPTREENIQVYN(de)VTK                        | 1788.937  | IPI0085069E | IPI0085069E | yes | yes |       | 2 | 0.0055858   | 99.451 |
| VQGGSSVWGSVITHN(de)SSAITYQSWGR             | 2763.3365 | IPI00453977 | IPI00453977 | yes | no  | 3,4   |   | 1.9265E-13  | 126.45 |
| VQPFN(de)VTK                               | 931.51272 | IPI00222967 | IPI00222967 | yes | no  | 1,2   |   | 0.018024    | 101.43 |
| VQPIASSTIHSIDITSVYGTVMN(de)R               | 2687.3953 | IPI0067425E | IPI0067425E | yes | yes | 3,4   |   | 8.2671E-17  | 145.04 |
| VQPMTASN(de)WTIVMEGEWMIK                   | 2350.116  | IPI0045382E | IPI0045382E | yes | no  |       | 3 | 3.2083E-14  | 150.91 |
| VQSIQTIAAN(de)NSAIK                        | 1627.8893 | IPI00129304 | IPI00129304 | yes | yes | 2,3   |   | 1.3044E-09  | 154.39 |
| VREAN(de)ITEDQIIFFPK                       | 1919.0153 | IPI00122122 | IPI00122122 | yes | no  | 2,3,4 |   | 3.0911E-05  | 134.76 |
| VRIDPPC(de)TNTTAPSNYINNPYVR                | 2661.2969 | IPI0065853E | IPI0065853E | yes | no  |       | 3 | 2.7013E-16  | 148.06 |
| VSESEKSIQVN(de)ETHWQYYGTSDDR               | 2843.2998 | IPI0074965E | IPI0074965E | yes | no  |       | 3 | 1.3024E-13  | 135.98 |
| VSGQMHHMN(de)ITFQTEASVAQKEK                | 2591.2108 | IPI00312711 | IPI00312711 | yes | no  |       | 3 | 4.7566E-08  | 109.5  |
| VSGQMHHMN(de)ITFQTEASVAQKEKFK              | 2995.4168 | IPI00312711 | IPI00312711 | yes | no  | 3,4   |   | 0.005255    | 65.184 |
| VSHVIN(de)DTHMK                            | 1279.6343 | IPI0067425E | IPI0067425E | yes | yes | 2,3   |   | 0.0068452   | 91.961 |
| VSIQEIPGSEHIEMIAN(de)ATTIAYIK              | 2727.4153 | IPI0012442E | IPI0012442E | yes | yes | 3,4   |   | 4.8931E-57  | 196.89 |
| VSIQEIPGSEHIEMIAN(de)ATTIAYIKR             | 2883.5164 | IPI0012442E | IPI0012442E | yes | yes |       | 3 | 0.0025698   | 70.699 |
| VSITN(de)VSISDEGR                          | 1375.6943 | IPI0085672E | IPI0085672E | yes | no  |       | 2 | 0.0004167   | 133.48 |
| VSNYIGQAN(de)QSAWITVIPK                    | 2088.1004 | IPI0082868E | IPI0082868E | yes | no  |       | 3 | 3.2042E-05  | 118.48 |
| VSQVIHEGGHN(de)VTK                         | 1503.7794 | IPI00463764 | IPI00463764 | yes | no  | 2,3,4 |   | 5.3145E-69  | 224.59 |
| VSQVIHEGGHN(de)VTKIYESANIPDFRK             | 3050.5938 | IPI00463764 | IPI00463764 | yes | no  | 3,4   |   | 1.9579E-05  | 97.5   |
| VSSSEINF(de)DPVDKVKPTPPYNISVTNSEEISSIK     | 3832.9622 | IPI0012015E | IPI0012015E | yes | yes |       | 4 | 0.016783    | 45.325 |
| VSTIYANN(de)GSVIQGSTVASVYHK                | 2394.2179 | IPI00121114 | IPI00121114 | yes | yes | 2,3,4 |   | 7.571E-223  | 291.78 |
| VSTIYANN(de)GSVIQGSTVASVYHKR               | 2550.319  | IPI00121114 | IPI00121114 | yes | yes | 3,4   |   | 7.553E-05   | 97.271 |
| VSTVTIVSATSTAN(de)MTMSPEGR                 | 2340.1301 | IPI0040660E | IPI0040660E | yes | yes | 2,3,4 |   | 2.0485E-17E | 276.68 |
| VTGITTSTTEITWDPPVIAERNGHITN(de)YTVVYR      | 3703.8846 | IPI00110264 | IPI00110264 | yes | yes | 3,4   |   | 8.4426E-06  | 81.297 |
| VTIDFN(de)ITDPENGPVIDDAIPNSVHGHIPFAK       | 3441.7205 | IPI01026704 | IPI01026704 | yes | yes | 3,4   |   | 4.119E-30   | 144.7  |
| VTIDFN(de)ITNPENGPVIDDAIPNSVHGHIPFAK       | 3440.7365 | IPI00466371 | IPI00466371 | yes | yes | 4,5   |   | 9.2159E-09  | 98.491 |
| VTIIPN(de)QTHYVVPK                         | 1607.9035 | IPI00742414 | IPI00742414 | yes | no  |       | 3 | 0.0031893   | 97.463 |
| VTIN(de)ESEICAGAEK                         | 1519.7188 | IPI0011650E | IPI0011650E | yes | no  |       | 2 | 0.0018044   | 104.45 |
| VTINNWWAN(de)K                             | 1157.6193 | IPI00136642 | IPI00136642 | yes | yes |       | 2 | 0.020004    | 87.568 |
| VTINNWWAN(de)KTEGR                         | 1600.8322 | IPI00136642 | IPI00136642 | yes | yes | 2,3   |   | 4.5438E-24  | 188.12 |
| VTIWWHPFVNYN(de)SSSFGEGER                  | 2523.2183 | IPI0046425E | IPI0046425E | yes | yes |       | 3 | 1.4107E-05  | 100.92 |
| VTNIMTQTAN(de)ATSIIGTMTDAFPK               | 2582.272  | IPI00923031 | IPI00923031 | yes | no  | 3,4   |   | 1.2668E-08  | 110.67 |
| VTNSNANAAGPIIVAGYN(de)VSGSVR               | 2330.1979 | IPI0022242E | IPI0022242E | yes | yes |       | 3 | 3.9332E-22  | 140.73 |
| VTPGAIIGISN(de)ITHISIK                     | 1833.0724 | IPI0031874E | IPI0031874E | yes | no  |       | 3 | 0.014226    | 69.331 |
| VTTCHIPQQN(de)ATIYK                        | 1772.888  | IPI00410951 | IPI00410951 | yes | no  | 2,3   |   | 0.0007379   | 110.98 |
| VTVEGMEYVFYN(de)DTK                        | 1793.8182 | IPI00405742 | IPI00405742 | yes | no  | 2,3   |   | 4.7927E-12  | 136.48 |
| VVAVSPAN(de)ISR                            | 1111.635  | IPI0022999E | IPI0022999E | yes | yes |       | 2 | 0.0097898   | 87.363 |
| VVAVSPAN(de)ISREER                         | 1525.8213 | IPI0022999E | IPI0022999E | yes | yes | 2,3   |   | 0.0002186   | 131.69 |
| VVDGEREN(de)VSMVDYAHNNYQAQSAVPIR           | 3160.4996 | IPI0013474E | IPI0013474E | yes | yes |       | 3 | 1.0408E-08  | 110.06 |
| VVDKGN(de)GSKPTSPEEVK                      | 1769.9159 | IPI0033063E | IPI0033063E | yes | no  |       | 3 | 0.0015576   | 104.94 |
| VVFISPAVPEEPEAYN(de)ITVIIR                 | 2455.3363 | IPI00405742 | IPI00405742 | yes | no  | 2,3,4 |   | 2.896E-49   | 197.1  |
| VVIAGSN(de)MTICCMSPTK                      | 1867.8664 | IPI0011929E | IPI0011929E | yes | no  | 2,3   |   | 2.7073E-12  | 156.67 |
| VVIGEN(de)ITSNCPEVIYEIKEETPVFYK            | 3169.5893 | IPI0067425E | IPI0067425E | yes | yes |       | 3 | 2.7011E-23  | 149.73 |
| VVIHPN(de)HSVVDIGIHK                       | 1739.0094 | IPI0040914E | IPI0040914E | yes | yes | 2,3,4 |   | 8.6636E-13E | 266.45 |
| VVIISGVEPRPPTPQVQFTIN(de)ASSEDHKR          | 3200.6942 | IPI0012297E | IPI0012297E | yes | no  | 3,4,5 |   | 2.6823E-09  | 114.2  |
| VVINFN(de)GTSQEIMAVSEHR                    | 2130.0528 | IPI0011118E | IPI0011118E | yes | yes |       | 3 | 9.901E-33   | 180.62 |
| VVMDIPEIWN(de)ETSAEVADIK                   | 2421.1774 | IPI0011903E | IPI0011903E | yes | no  | 2,3   |   | 4.5552E-49  | 197.09 |
| VVMDIPEIWN(de)ETSAEVADIKK                  | 2549.2723 | IPI0011903E | IPI0011903E | yes | no  | 2,3,4 |   | 1.0683E-08  | 127.01 |
| VVN(de)VSEIYGPCTK                          | 1565.7759 | IPI0062695E | IPI0062695E | yes | no  |       | 3 | 0.0027177   | 99.844 |
| VVN(de)VSEIYGPCTKR                         | 1721.8771 | IPI0062695E | IPI0062695E | yes | no  |       | 3 | 0.026524    | 74.987 |
| VVNCQEFAN(de)ASR                           | 1664.7941 | IPI0011833E | IPI0011833E | yes | yes |       | 2 | 0.0013323   | 104.44 |
| VVPEPNIVIN(de)FSATAIR                      | 1839.0254 | IPI0065418E | IPI0065418E | yes | no  |       | 3 | 0.0006208   | 99.344 |
| VVRPDSEIGERPPEDN(de)QSFQYDHEAFIGK          | 3358.5854 | IPI00137831 | IPI00137831 | yes | yes |       | 4 | 1.4354E-13  | 121.38 |
| VVSVDISFRPIN(de)ETFPVVYIETPK               | 2748.4738 | IPI0062466E | IPI0062466E | yes | yes | 2,3,4 |   | 1.1572E-12E | 242.18 |
| VVSVDISFRPIN(de)ETFPVVYIETPKR              | 2904.5749 | IPI0062466E | IPI0062466E | yes | yes | 3,4,5 |   | 5.535E-243  | 219.61 |
| VWDTAAAIN(de)R                             | 1115.5724 | IPI0022656E | IPI0022656E | yes | no  |       | 2 | 0.010745    | 97.456 |
| VWN(de)QTEQEPAAHYHISICFVR                  | 2560.2533 | IPI0012907E | IPI0012907E | yes | no  |       | 3 | 0.010724    | 66.068 |
| VWPDGVIPFVIGGN(de)FTGSQR                   | 2145.1007 | IPI0012518E | IPI0012518E | yes | no  | 2,3   |   | 8.2354E-07  | 131.25 |
| VWPDYPN(de)ITVDPSIGWDHQVEQYR               | 2913.3722 | IPI0084869E | IPI0084869E | yes | yes |       | 3 | 0.0003648   | 102.07 |
| VWVCDRDN(de)DCVDGSDEPANCTQMTGCVDEFR        | 3706.4487 | IPI0011906E | IPI0011906E | yes | yes | 3,4   |   | 1.72E-58    | 180.26 |
| VWVCDRDNDCVDGSDEPAN(de)CTQMTGCVDEFR        | 3706.4487 | IPI0011906E | IPI0011906E | yes | yes | 3,4   |   | 1.72E-58    | 180.26 |
| VYEEVINV(de)TPNDGFAK                       | 1793.8836 | IPI0062489E | IPI0062489E | yes | no  |       | 2 | 0.0017502   | 92.264 |
| VYGGIVN(de)QSEINEGTAFRR                    | 2100.0276 | IPI0041628E | IPI0041628E | yes | yes | 2,3   |   | 1.1702E-42  | 197.84 |
| VYGNIN(de)ETWSR                            | 1579.7379 | IPI0076260E | IPI0076260E | yes | no  |       | 2 | 0.0037803   | 95.631 |
| VYIHPFHIIYHN(de)K                          | 1679.8936 | IPI0065406E | IPI0065406E | yes | yes | 2,3,4 |   | 1.4134E-15  | 175.15 |
| VYIN(de)DSVEISR                            | 1293.6565 | IPI0012676E | IPI0012676E | yes | yes |       | 2 | 0.033214    | 72.089 |
| VYIN(de)DSVEISRNEK                         | 1778.8799 | IPI0012676E | IPI0012676E | yes | yes |       | 2 | 1.1128E-32  | 188.59 |
| VYMKN(de)VTVVIR                            | 1320.7588 | IPI0046921E | IPI0046921E | yes | yes | 2,3   |   | 1.1019E-05  | 147.74 |
| VYQIDGNYPGSSHVVIDHETYIIN(de)ITQANAAGGTPSWK | 4115.0025 | IPI0013779E | IPI0013779E | yes | yes |       | 4 | 3.344E-05   | 63.44  |
| VYSIPGREN(de)YSSVDANGIQSQMISR              | 2770.3344 | IPI0012710E | IPI0012710E | yes | yes |       | 3 | 5.1565E-05  | 96.016 |
| VYTYADTPNDFQISN(de)FSIPEEDTK               | 2793.2657 | IPI00108811 | IPI00108811 | yes | yes | 2,3,4 |   | 3.4655E-16  | 141.36 |
| VYTYADTPNDFQISN(de)FSIPEEDTKIK             | 3034.4448 | IPI00108811 | IPI00108811 | yes | yes | 3,4   |   | 2.0866E-27  | 164.94 |

|                                          |           |             |             |     |     |       |   |             |        |
|------------------------------------------|-----------|-------------|-------------|-----|-----|-------|---|-------------|--------|
| VYTYADTPNDFQISN(de)FSIPEEDTKIKIPIIHQAIAK | 4048.0833 | IPI00108811 | IPI00108811 | yes | yes |       | 4 | 7.2636E-15  | 111.81 |
| VYVYAVN(de)QTR                           | 1211.6299 | IPI00466371 | IPI01026704 | no  | no  |       | 2 | 0.0021195   | 110.39 |
| WAAVVVPIGKEQN(de)YTCHVHHK                | 2472.2485 | IPI00850057 | IPI00850057 | yes | no  |       | 3 | 0.0065659   | 78.078 |
| WASVVVPIGKEQN(de)YTCR                    | 2006.0044 | IPI0010999€ | IPI0010999€ | yes | no  | 2,3   |   | 3.2409E-11  | 154.51 |
| WECKN(de)DTIFGIK                         | 1509.7286 | IPI0012618€ | IPI0012618€ | yes | yes |       | 2 | 0.002764    | 111.79 |
| WGEVDIIGN(de)CSQFYPR                     | 2054.9156 | IPI0032067€ | IPI0032067€ | yes | yes |       | 2 | 2.5978E-08  | 142.78 |
| WGHN(de)VTEFQQR                          | 1400.6585 | IPI0075438€ | IPI0075438€ | yes | yes |       | 2 | 0.025162    | 75.819 |
| WKPPSDPNGN(de)ITHYIVYWER                 | 2471.2022 | IPI0012835€ | IPI0012835€ | yes | no  |       | 3 | 0.0026183   | 89.846 |
| WTDNTEYN(de)NTIPIRGEER                   | 2207.0243 | IPI0027643€ | IPI0027643€ | yes | yes | 2,3   |   | 1.0575E-08  | 145.33 |
| WTGHN(de)VTVVQR                          | 1295.6735 | IPI0011906€ | IPI0011906€ | yes | yes |       | 2 | 0.0005031   | 121.68 |
| YAFQEIIIGDISFIPTIN(de)FSK                | 2415.2726 | IPI00122557 | IPI00122557 | yes | no  | 2,3   |   | 1.4196E-17  | 157.22 |
| YAIICGN(de)RTDAGQCPEGYVCVK               | 2530.1403 | IPI0034128€ | IPI0034128€ | yes | yes |       | 3 | 7.4463E-08  | 123.63 |
| YATENDISSIHN(de)STITCIVNQTTSTITGTSPEIMEK | 3854.819  | IPI0023031€ | IPI0023031€ | yes | no  | 3,4   |   | 1.9522E-15  | 111.97 |
| YATENDISSIHNSTITCIVN(de)QTTSTITGTSPEIMEK | 3854.819  | IPI0023031€ | IPI0023031€ | yes | no  | 3,4   |   | 1.9522E-15  | 111.97 |
| YAVYWN(de)SSNPR                          | 1355.6258 | IPI00114364 | IPI00114364 | yes | no  |       | 2 | 0.0045714   | 96.604 |
| YDIIINENGIISN(de)VSEPARAR                | 2514.333  | IPI0022993€ | IPI0022993€ | yes | yes |       | 3 | 4.3323E-05  | 96.55  |
| YDIPASINYIIN(de)K                        | 1522.8031 | IPI0012926€ | IPI0012926€ | yes | yes | 2,3   |   | 0.0002331   | 138.99 |
| YDKSEVDGAAAMIN(de)YTHIIMEAVPGHPAIYR      | 3431.6642 | IPI0087485€ | IPI0087485€ | yes | no  | 3,4   |   | 2.0082E-08  | 103.25 |
| YDN(de)HSSSVIAAVVFEHSFNHSQDPIPIAVK       | 3307.6262 | IPI00153807 | IPI00153807 | yes | no  |       | 4 | 0.018136    | 49.618 |
| YDNHSSSVIAAVVFEHSFN(de)HSQDPIPIAVK       | 3307.6262 | IPI00153807 | IPI00153807 | yes | no  |       | 4 | 0.018136    | 49.618 |
| YDVN(de)RSDSGGSIQIEEGYFVHHFAPENIPTMSK    | 3723.7264 | IPI00312711 | IPI00312711 | yes | no  |       | 4 | 2.6831E-34  | 149.04 |
| YEPFASMN(de)ESTPTGITDHAQGPENIEESPK       | 3782.7622 | IPI0013360€ | IPI0013360€ | yes | yes |       | 4 | 1.8049E-17  | 116.34 |
| YEPFASMN(de)ESTPTGITDHAQGPENIEESPKR      | 3938.8633 | IPI0013360€ | IPI0013360€ | yes | yes |       | 4 | 1.3284E-05  | 68.93  |
| YEQAKN(de)ISQDIEK                        | 1564.7733 | IPI0040001€ | IPI0040001€ | yes | no  |       | 2 | 0.033837    | 81.703 |
| YEQIQN(de)ETR                            | 1179.552  | IPI0015405€ | IPI0015405€ | yes | no  |       | 2 | 0.0030228   | 118.4  |
| YEVVDWN(de)QSTIDCVDPISIAANR              | 2652.2126 | IPI0033103€ | IPI0033103€ | yes | no  |       | 3 | 4.8478E-17  | 154.6  |
| YEVVDWNQSTIDCVDPISIAAN(de)R              | 2652.2126 | IPI0033103€ | IPI0033103€ | yes | no  |       | 3 | 4.8478E-17  | 154.6  |
| YFFIQSVSDSDGRN(de)FTSSPPGQTQFK           | 2852.3406 | IPI0034468€ | IPI0034468€ | yes | yes | 3,4   |   | 1.035E-34   | 170.14 |
| YFTNRIDVSQN(de)VSSDTDQSCESTK             | 2780.2195 | IPI0012076€ | IPI0012076€ | yes | no  |       | 3 | 6.3971E-13  | 132.01 |
| YGHPN(de)GTQGNSTMWVFTSTEQK               | 2566.1547 | IPI0013116€ | IPI0013116€ | yes | yes |       | 3 | 3.1521E-08  | 115.42 |
| YGHPNGTQGN(de)STMWVFTSTEQK               | 2566.1547 | IPI0013116€ | IPI0013116€ | yes | yes |       | 3 | 3.1521E-08  | 115.42 |
| YGIVVIDECPGVGIVIPQSFGN(de)ESIR           | 2817.4371 | IPI0030923€ | IPI0030923€ | yes | no  | 2,3   |   | 1.9442E-27  | 159.98 |
| YGKN(de)DSITITQIK                        | 1479.7933 | IPI0012342€ | IPI0012342€ | yes | no  | 2,3   |   | 6.6153E-31  | 194.98 |
| YGMQNSGNEAAWN(de)YTIEQYQK                | 2494.0859 | IPI0013458€ | IPI0013458€ | yes | yes |       | 3 | 2.3476E-59  | 202.6  |
| YGN(de)MTQDQDHVMHIITR                    | 1814.8556 | IPI0011589€ | IPI0011589€ | yes | no  | 2,3   |   | 0.0027557   | 89.624 |
| YGTAVHIYVN(de)ETIANR                     | 1933.0058 | IPI00719927 | IPI00719927 | yes | no  | 2,3   |   | 7.1617E-21  | 175.51 |
| YGTAVHIYVNETIAN(de)R                     | 1933.0058 | IPI00719927 | IPI00719927 | yes | no  | 2,3   |   | 7.1617E-21  | 175.51 |
| YGYEN(de)DTEIANIYDEMVAK                  | 2236.9834 | IPI0084869€ | IPI0084869€ | yes | yes |       | 3 | 5.0786E-09  | 137.45 |
| YHGFIN(de)TSYHR                          | 1393.6527 | IPI0015405€ | IPI0015405€ | yes | no  | 2,3   |   | 4.1151E-06  | 147.37 |
| YHHYSSN(de)FSIPK                         | 1478.6943 | IPI0012948€ | IPI0012948€ | yes | no  | 2,3   |   | 0.0007928   | 122.7  |
| YHYN(de)ASIIDGTIIDSTWNIGK                | 2380.1699 | IPI0013048€ | IPI0013048€ | yes | yes |       | 3 | 1.7039E-09  | 135.09 |
| YHYN(de)GTFIDGTIFDSSHNR                  | 2243.0032 | IPI0013048€ | IPI0013048€ | yes | yes | 2,3   |   | 8.7438E-26  | 174.78 |
| YHYN(de)GTIIDGTAFDSSYSR                  | 2192.9763 | IPI0012249€ | IPI0012249€ | yes | no  | 2,3   |   | 2.358E-05   | 120.9  |
| YHYN(de)GTIIDGTIFDSSYSR                  | 2208.0124 | IPI0013048€ | IPI0013048€ | yes | yes | 2,3   |   | 2.6059E-25  | 168.05 |
| YIEIGN(de)ETIIR                          | 1319.7085 | IPI00850057 | IPI00850057 | yes | no  |       | 2 | 0.0005716   | 114.24 |
| YIIVAQIN(de)ISR                          | 1288.7503 | IPI00228567 | IPI00228567 | yes | yes |       | 2 | 0.0006413   | 113.47 |
| YIKNGN(de)ATIIR                          | 1261.7143 | IPI0098582€ | IPI0010999€ | no  | no  | 2,3   |   | 1.1114E-05  | 151.79 |
| YIMWGISSDIWGEKPN(de)TSYIIGK              | 2657.32   | IPI00323624 | IPI00323624 | yes | no  |       | 3 | 0.016583    | 65.808 |
| YIN(de)ETQQITQK                          | 1364.6936 | IPI0012322€ | IPI0012322€ | yes | yes |       | 2 | 1.2131E-41  | 203.61 |
| YIN(de)ETQQITQKIK                        | 1605.8726 | IPI0012322€ | IPI0012322€ | yes | yes |       | 2 | 0.0009547   | 135.81 |
| YIN(de)FSTSEKEK                          | 1344.6561 | IPI0013501€ | IPI0013501€ | yes | no  |       | 2 | 0.0029553   | 109.24 |
| YIQPIAVQFTN(de)ITVDTEIR                  | 2333.2631 | IPI0012155€ | IPI0012155€ | yes | yes | 2,3   |   | 4.4779E-11€ | 241.68 |
| YIQVVYIHNNN(de)ISAVGQNDFCR               | 2623.2602 | IPI0012319€ | IPI0012319€ | yes | yes | 2,3,4 |   | 5.4057E-86  | 221.79 |
| YIYIASN(de)HSNK                          | 1308.6463 | IPI0011817€ | IPI0011817€ | yes | no  |       | 2 | 0.0040377   | 98.156 |
| YKGIN(de)ITEDTYKPR                       | 1696.8784 | IPI0011980€ | IPI0011980€ | yes | yes | 2,3   |   | 9.5074E-23  | 182.02 |
| YKGN(de)ASAFIIPDQGR                      | 1748.921  | IPI0012807€ | IPI0012807€ | yes | yes | 2,3   |   | 3.7648E-05  | 134.24 |
| YKGTAGNAIMDGASQIVGEN(de)R                | 2151.0379 | IPI0027907€ | IPI0027907€ | yes | yes | 2,3   |   | 4.3283E-48  | 193.22 |
| YKVAEIIAN(de)TSENAGFCIPEGNCMDSGVINISICK  | 3970.8573 | IPI00127447 | IPI00127447 | yes | yes | 4,5,6 |   | 1.5077E-43  | 152.13 |
| YKVAEIIANTSENAGFCIPEGNCMDSGVIN(de)ISICK  | 3970.8573 | IPI00127447 | IPI00127447 | yes | yes | 4,5,6 |   | 1.5077E-43  | 152.13 |
| YKYETTISPTSN(de)ISSNSFICIENR             | 2823.3385 | IPI0062583€ | IPI0062583€ | yes | no  | 2,3,4 |   | 4.7414E-94  | 227.4  |
| YKYETTISPTSNISSNSFICIEN(de)R             | 2823.3385 | IPI0062583€ | IPI0062583€ | yes | no  | 2,3,4 |   | 4.7414E-94  | 227.4  |
| YMDQNSDQWQDGVGYIN(de)SSEGAVGR            | 2704.146  | IPI0011423€ | IPI0011423€ | yes | no  |       | 3 | 1.4653E-16  | 143.31 |
| YMGPIPEDNIDHYRN(de)STVMSR                | 2607.221  | IPI0012581€ | IPI0012581€ | yes | no  | 2,3   |   | 6.1394E-05  | 96.544 |
| YMN(de)YTSIITFHCK                        | 1676.7691 | IPI00308971 | IPI00308971 | yes | yes |       | 3 | 0.0012301   | 107.97 |
| YN(de)HTGQVVIYK                          | 1320.6826 | IPI00466371 | IPI01026704 | no  | no  | 2,3   |   | 9.2469E-10  | 160.18 |
| YPHKPEIN(de)STTHPGADIK                   | 2004.0065 | IPI0011420€ | IPI0011420€ | yes | yes | 2,3   |   | 2.0802E-37  | 195.6  |
| YPHKPEIN(de)STTHPGADIKENFCR              | 2710.2922 | IPI0011420€ | IPI0011420€ | yes | yes |       | 3 | 8.9811E-05  | 96.234 |
| YPQDYQFYIQN(de)FTAIPINTVVPQR             | 3011.5181 | IPI0011085€ | IPI0011085€ | yes | no  | 2,3,4 |   | 8.0962E-21  | 149.44 |
| YPTPGEAPGVVGNFN(de)K                     | 1645.81   | IPI00112614 | IPI00112614 | yes | yes | 2,3   |   | 0.0003888   | 118.37 |
| YQEGDITIYVINIHN(de)VTK                   | 2119.095  | IPI0017009€ | IPI0017009€ | yes | no  |       | 3 | 0.0001347   | 108.77 |
| YQEIIIEISSIN(de)KTQWK                    | 2108.079  | IPI0099093€ | IPI0099093€ | yes | no  | 2,3   |   | 2.3386E-74  | 228.46 |
| YQFNTNVVFSND(de)GTIVDR                   | 2087.9912 | IPI0032137€ | IPI0032137€ | yes | no  | 2,3   |   | 9.9369E-49  | 206.64 |
| YQFNTNVVFSND(de)GTIVDRYR                 | 2407.1557 | IPI0032137€ | IPI0032137€ | yes | no  |       | 3 | 0.0050712   | 82.877 |
| YQHVGQVIIFQAPEAGGRWN(de)QTQK             | 2754.399  | IPI0089497€ | IPI0089497€ | yes | no  | 3,4   |   | 3.4216E-64  | 148.85 |
| YQMDN(de)VSSIVQIIGSHIEDVNADIIQTK         | 3129.5652 | IPI00330594 | IPI00330594 | yes | yes | 3,4   |   | 4.95E-33    | 157.9  |
| YRAEFVAN(de)DTGFVDIPQKEK                 | 2397.1601 | IPI00128154 | IPI00128154 | yes | no  | 2,3   |   | 2.3632E-30  | 174.2  |
| YSIYKDPAGWISINPIN(de)GTVDTTAVIDR         | 3078.5662 | IPI0012374€ | IPI0012374€ | yes | yes |       | 3 | 1.4414E-13  | 122.84 |
| YSN(de)ESQDISVNGYNCTTSSVSSAIR            | 2738.209  | IPI00322304 | IPI00322304 | yes | yes | 2,3   |   | 1.5218E-56  | 195.7  |
| YSNESQDISVNGYN(de)CTTSSVSSAIR            | 2738.209  | IPI00322304 | IPI00322304 | yes | yes | 2,3   |   | 1.5218E-56  | 195.7  |
| YSQAAN(de)STKEIDDCEQANK                  | 2170.9437 | IPI0018735€ | IPI0018735€ | yes | yes | 2,3   |   | 4.8212E-13  | 148.06 |
| YSVITAEKPVGDISSPN(de)ETK                 | 2247.1634 | IPI00125497 | IPI00125497 | yes | yes |       | 3 | 8.9712E-08  | 124.63 |
| YSVQHMYFTYN(de)ISDTEHFPNAISK             | 2891.3225 | IPI0046921€ | IPI0046921€ | yes | yes | 2,3,4 |   | 6.2351E-35  | 168.3  |
| YTGN(de)ASAFIIPDQGR                      | 1721.8737 | IPI0013563€ | IPI0013563€ | yes | no  | 2,3   |   | 1.0993E-57  | 214.81 |
| YTGN(de)ASAIIPDQGR                       | 1687.8893 | IPI0013183€ | IPI0013183€ | yes | no  | 2,3   |   | 2.0817E-42  | 186.98 |
| YTSFEYPKN(de)ISFACNPGFFINGTSSSK          | 3062.412  | IPI0032246€ | IPI0032246€ | yes | no  | 2,3,4 |   | 6.9947E-39  | 177.91 |
| YTSFEYPKNISFACNPGFFIN(de)GTSSSK          | 3062.412  | IPI0032246€ | IPI0032246€ | yes | no  | 2,3,4 |   | 6.9947E-39  | 177.91 |



|                                           |           |             |             |     |     |     |             |        |
|-------------------------------------------|-----------|-------------|-------------|-----|-----|-----|-------------|--------|
| YVMIPVADQDKCVVHYEN(de)STVPEKK             | 2948.4412 | IPI0040914E | IPI0040914E | yes | yes | 3,4 | 2.4143E-45  | 187.47 |
| YVVVSTPEKSQITISNIDVN(de)VDPGTYVCNATNAQGTR | 4111.0168 | IPI0040849E | IPI0040849E | yes | no  |     | 4 1.921E-15 | 112.57 |
| YVYVADIIAHEIHVIEKQPNMN(de)ITQIK           | 3178.6849 | IPI00310567 | IPI00310567 | yes | yes | 3,4 | 6.4614E-19  | 142.23 |
| YWGN(de)ITVVMGEHDFSEKDGDEQVR              | 2810.2606 | IPI0030789C | IPI0030789C | yes | yes |     | 3 0.002311  | 81.016 |
| YYHGEISYIN(de)VTR                         | 1613.7838 | IPI00404551 | IPI00404551 | yes | no  | 2,3 | 3.9853E-23  | 187.44 |
| YYHGEISYIN(de)VTRK                        | 1741.8788 | IPI00404551 | IPI00404551 | yes | no  | 2,4 | 8.7651E-32  | 192.39 |
| YYN(de)QSAGGSHTIQWMAGCDVESDGR             | 2788.1606 | IPI0098582E | IPI0098582E | yes | no  | 3,4 | 1.3188E-68  | 207.43 |
| YYN(de)YTISINGK                           | 1334.6507 | IPI0022142E | IPI0022142E | yes | yes |     | 2 0.0013515 | 111.52 |

N-terminal Ser/Thr ratio 257 13.90%

Conventional HC strategy 1

De-glycopeptides Sequence

| De-glycopeptides Sequence        | Mass      | Proteins    | Leading r:  | Unique (C | Unique (P | Charges | PEP           | Score  |
|----------------------------------|-----------|-------------|-------------|-----------|-----------|---------|---------------|--------|
| YYN(de)YTISINGK                  | 1334.6507 | IPI0022142E | IPI0022142E | yes       | yes       |         | 2 6.9856E-15  | 184.03 |
| YYN(de)QSKGGSHTFQR               | 1671.7754 | IPI00850057 | IPI00850057 | yes       | no        |         | 2 0.0029419   | 145    |
| YYN(de)QSAGGSHTIQWMAGCDVESDGR    | 2788.1606 | IPI0098582E | IPI0098582E | yes       | no        | 2,3     | 7.9418E-56    | 207.43 |
| YYHGEISYIN(de)VTRK               | 1741.8788 | IPI00404551 | IPI00404551 | yes       | no        | 2,3,4   | 0.0005892     | 148.41 |
| YYHGEISYIN(de)VTR                | 1613.7838 | IPI00404551 | IPI00404551 | yes       | no        | 2,3     | 3.838E-09     | 160.84 |
| YVYVADIIAHEIHVIEKQPNMN(de)ITQIK  | 3178.6849 | IPI00310567 | IPI00310567 | yes       | yes       | 3,4     | 3.3737E-147   | 245.66 |
| YVQN(de)GTYTAK                   | 1143.556  | IPI0011579E | IPI0011579E | yes       | yes       |         | 2 0.017716    | 99.283 |
| YVMIPVADQDKCVVHYEN(de)STVPEKK    | 2948.4412 | IPI0040914E | IPI0040914E | yes       | yes       |         | 3 1.3197E-08  | 122.19 |
| YTSFEYPKNISFA(de)CNPFFINGTSSSK   | 3062.412  | IPI0032246E | IPI0032246E | yes       | no        |         | 3 1.92E-74    | 214.65 |
| YTSFEYPKN(de)ISFACNPGFFINGTSSSK  | 3062.412  | IPI0032246E | IPI0032246E | yes       | no        |         | 3 1.92E-74    | 214.65 |
| YTGN(de)ASAIIPDQGR               | 1687.8893 | IPI0013183C | IPI0013183C | yes       | no        | 2,3     | 1.4462E-11C   | 241.68 |
| YTGN(de)ASAIIPDQGR               | 1721.8737 | IPI0013563E | IPI0013563E | yes       | no        | 2,3     | 9.708E-48     | 209.89 |
| YSVQHMYFTYN(de)ISDTEHFPNAISK     | 2891.3225 | IPI0046921E | IPI0046921E | yes       | yes       | 2,3,4   | 3.4254E-18    | 171.42 |
| YSVIIAEKPVGDISSPN(de)ETK         | 2247.1634 | IPI00125497 | IPI00125497 | yes       | yes       | 2,3     | 9.5358E-21    | 181.54 |
| YSQAAN(de)STKEIDDCEQANK          | 2170.9437 | IPI0018735E | IPI0018735E | yes       | yes       | 2,3     | 0.000327      | 140.89 |
| YSNESQDISVNGYN(de)CTTSSVSSAIR    | 2738.209  | IPI00322304 | IPI00322304 | yes       | yes       | 2,3     | 1.7526E-68    | 213.05 |
| YSN(de)ESQDISVNGYNCTTSSVSSAIR    | 2738.209  | IPI00322304 | IPI00322304 | yes       | yes       | 2,3     | 1.7526E-68    | 213.05 |
| YRAEFVAN(de)DTGFVDIPQKEK         | 2397.1601 | IPI00128154 | IPI00128154 | yes       | no        | 2,3     | 6.2011E-21    | 183.05 |
| YQMDN(de)VSSIVQIIGSHIEDVNADIIQTK | 3129.5652 | IPI00330594 | IPI00330594 | yes       | yes       | 3,4     | 9.6091E-40    | 192.94 |
| YQHVGQVIFQAPEAGGRWN(de)QTQK      | 2754.399  | IPI0089497E | IPI0089497E | yes       | no        |         | 3 1.7758E-08  | 132.14 |
| YQFNTNVVFSN(de)GTIVDR            | 2087.9912 | IPI0032137E | IPI0032137E | yes       | no        | 2,3     | 2.5388E-19    | 184.32 |
| YQFEVICPAPRPGAASN(de)ISFQAPFR    | 2822.3963 | IPI0031115E | IPI0031115E | yes       | yes       |         | 3 1.2311E-08  | 120.25 |
| YQEIIIESSIN(de)KTQWK             | 2108.079  | IPI0067579E | IPI0067579E | yes       | no        |         | 2 2.2947E-47  | 209.25 |
| YQEGDITIYVINIHN(de)VTK           | 2119.095  | IPI0017009E | IPI0017009E | yes       | no        |         | 2 0.0016833   | 101.49 |
| YPQDYQFYIQN(de)FTAIPINTVPPQR     | 3011.5181 | IPI0011085E | IPI0011085E | yes       | no        | 2,3,4   | 9.3384E-10    | 136.14 |
| YPNN(de)GSIVWGK                  | 1233.6142 | IPI0084869E | IPI0084869E | yes       | yes       |         | 2 0.0087193   | 102.4  |
| YPHNHHVNNNTIEGN(de)CSSK          | 2205.9974 | IPI0022142E | IPI0022142E | yes       | yes       |         | 3 0.025361    | 73.168 |
| YPHNHHVNN(de)NTIEGNCSK           | 2205.9974 | IPI0022142E | IPI0022142E | yes       | yes       |         | 3 0.025361    | 73.168 |
| YPHKPEIN(de)STTHPGADIKENFCR      | 2710.2922 | IPI0011420E | IPI0011420E | yes       | yes       |         | 3 0.013955    | 77.037 |
| YPHKPEIN(de)STTHPGADIK           | 2004.0065 | IPI0011420E | IPI0011420E | yes       | yes       | 2,3     | 0.0090011     | 99.392 |
| YPAEQQRPIPN(de)VSIPR             | 1906.0425 | IPI00453524 | IPI00453524 | yes       | yes       | 2,3     | 0.0006845     | 150.34 |
| YN(de)YTEDPTIIR                  | 1383.667  | IPI00137311 | IPI00137311 | yes       | yes       |         | 2 0.0015286   | 130.56 |
| YN(de)HTGQVVIYK                  | 1320.6826 | IPI00466371 | IPI01026704 | no        | no        | 2,3     | 1.4714E-09    | 169.52 |
| YN(de)GSIGIWR                    | 1064.5403 | IPI0013329E | IPI0013329E | yes       | no        |         | 2 0.031481    | 96.143 |
| YMN(de)YTSIITFHCK                | 1676.7691 | IPI00308971 | IPI00308971 | yes       | yes       |         | 2 0.024118    | 84.468 |
| YMGIPEDNIDHYRN(de)STVMRSR        | 2607.221  | IPI0012581E | IPI0012581E | yes       | no        |         | 3 0.01059     | 82.877 |
| YMDQNSDQWQDGVGYIN(de)SSEGAVGR    | 2704.146  | IPI0011423E | IPI0011423E | yes       | no        |         | 3 2.8288E-05  | 95.996 |
| YMAIAIN(de)R                     | 950.50077 | IPI00123814 | IPI00123814 | yes       | yes       |         | 2 0.020618    | 129.4  |
| YKYETTISPTSNISSNSFCIEN(de)R      | 2823.3385 | IPI0062583E | IPI0062583E | yes       | no        | 2,3     | 1.3246E-48    | 198.1  |
| YKYETTISPTSN(de)ISSNSFCIENR      | 2823.3385 | IPI0062583E | IPI0062583E | yes       | no        | 2,3     | 1.3246E-48    | 198.1  |
| YKGTAGNAIMDGASQIVGEN(de)R        | 2151.0379 | IPI0027907E | IPI0027907E | yes       | yes       | 2,3     | 3.5497E-06    | 153.36 |
| YKGIN(de)ITEDTYKPR               | 1696.8784 | IPI0011980E | IPI0011980E | yes       | yes       | 2,3     | 7.3042E-36    | 200.19 |
| YIYIASN(de)HSNK                  | 1308.6463 | IPI0011817E | IPI0011817E | yes       | no        |         | 2 0.0069329   | 107.03 |
| YIQVVYIHNNN(de)ISAVGQNDFCR       | 2623.2602 | IPI0012319E | IPI0012319E | yes       | yes       | 2,3     | 1.3508E-247   | 220.64 |
| YIQPIAVQFTN(de)ITVDTEIR          | 2333.2631 | IPI0012155C | IPI0012155C | yes       | yes       | 2,3     | 1.911E-20     | 180.08 |
| YIN(de)ETQQITQK                  | 1364.6936 | IPI0012322E | IPI0012322E | yes       | yes       |         | 2 1.5475E-147 | 191.79 |
| YIMWGISSDIWGEKPN(de)TSYIIGK      | 2657.32   | IPI00323624 | IPI00323624 | yes       | no        |         | 3 0.003814    | 85.636 |
| YIKNGN(de)ATIIR                  | 1261.7143 | IPI0098582E | IPI0098582E | no        | no        |         | 2 7.5902E-06  | 162.26 |
| YIKNGN(de)ATIIR                  | 1261.7143 | IPI0098582E | IPI0098582E | no        | no        |         | 2 7.5902E-06  | 162.26 |
| YIINGSHAN(de)ETR                 | 1373.6688 | IPI0012996E | IPI0012996E | yes       | yes       |         | 2 0.021839    | 89.43  |
| YIIN(de)GSHANETR                 | 1373.6688 | IPI0012996E | IPI0012996E | yes       | yes       |         | 2 0.021839    | 89.43  |
| YIIDFSIFAYPIPN(de)VTK            | 2000.0659 | IPI00330381 | IPI00330381 | yes       | no        |         | 2 0.0008131   | 118.47 |
| YIEIGN(de)ETIIR                  | 1319.7085 | IPI00850057 | IPI00850057 | yes       | no        |         | 2 2.2153E-39  | 203.51 |
| YHYN(de)GTIIDGTIFDSSYSR          | 2208.0124 | IPI0013048E | IPI0013048E | yes       | yes       | 2,3     | 4.8516E-62    | 216.3  |
| YHYN(de)GTIIDGTAFDSSYSR          | 2192.9763 | IPI0012249E | IPI0012249E | yes       | no        | 2,3     | 0.0002248     | 139.11 |
| YHYN(de)GTFIDGTIFDSSHNR          | 2243.0032 | IPI0013048E | IPI0013048E | yes       | yes       | 2,3     | 3.5324E-19    | 181.54 |
| YHYN(de)CSIIDGTR                 | 1497.6671 | IPI0012249E | IPI0012249E | yes       | no        |         | 2 0.020968    | 83.204 |
| YHYN(de)ASIIDGTIIDSTWNIGK        | 2380.1699 | IPI0013048E | IPI0013048E | yes       | yes       | 2,3     | 5.3951E-51    | 204.47 |
| YHVIHIN(de)TTK                   | 1224.6615 | IPI00131021 | IPI00131021 | yes       | yes       | 2,3     | 0.002399      | 125.74 |
| YHHYSSN(de)FSIPK                 | 1478.6943 | IPI0012948E | IPI0012948E | yes       | no        | 2,3     | 3.097E-05     | 151.26 |
| YHGFIN(de)TSYHR                  | 1393.6527 | IPI0015405E | IPI0015405E | yes       | no        | 2,3     | 0.0015949     | 124.42 |
| YHDYITSTSNG(de)SIEGIENR          | 2318.0451 | IPI00130754 | IPI00130754 | yes       | yes       | 2,3     | 2.0878E-05    | 119.62 |
| YGTAIVHIYVNETIAN(de)R            | 1933.0058 | IPI00719927 | IPI00719927 | yes       | no        |         | 2 2.9382E-08  | 167.29 |
| YGTAIVHIYV(de)ETIANR             | 1933.0058 | IPI00719927 | IPI00719927 | yes       | no        |         | 2 2.9382E-08  | 167.29 |
| YGQEQGTAPFQVSN(de)HTGR           | 1975.9137 | IPI0040939E | IPI0040939E | yes       | yes       |         | 3 0.000863    | 106.6  |
| YGN(de)MTQDQHMHIITR              | 1814.8556 | IPI0011589E | IPI0011589E | yes       | no        | 2,3     | 0.0026925     | 101.6  |
| YGMQNSGNEAAWN(de)YTIEQYQK        | 2494.0859 | IPI0013458E | IPI0013458E | yes       | yes       | 2,3     | 3.1749E-13E   | 250.26 |
| YGKN(de)DSITITQIK                | 1479.7933 | IPI0012342E | IPI0012342E | yes       | no        | 2,3     | 0.0081635     | 136.17 |
| YGIVVIDECPGVGIVIPQSFGN(de)ESIR   | 2817.4371 | IPI0030923C | IPI0030923C | yes       | no        |         | 3 5.1452E-11  | 113.7  |
| YGHPNGTQGN(de)STMWPVFTSTEQK      | 2566.1547 | IPI0013116E | IPI0013116E | yes       | yes       |         | 3 6.1351E-09  | 149.44 |
| YGHPN(de)GTQGNSTMWPVFTSTEQK      | 2566.1547 | IPI0013116E | IPI0013116E | yes       | yes       |         | 3 6.1351E-09  | 149.44 |
| YFTNRI(de)DVSQNVSSDTDQSCESTK     | 2780.2195 | IPI0012076E | IPI0012076E | yes       | no        |         | 3 1.7873E-08  | 144.57 |

|                                            |           |             |             |     |     |       |   |             |        |
|--------------------------------------------|-----------|-------------|-------------|-----|-----|-------|---|-------------|--------|
| YFFIQSVSDSDGRN(de)FTSSPPGQTQFK             | 2852.3406 | IPI0034468E | IPI0034468E | yes | yes |       | 3 | 2.6508E-55  | 207.07 |
| YEVVDWNQSTIDCVDPISIAAN(de)R                | 2652.2126 | IPI00331032 | IPI00331032 | yes | no  | 2,3   |   | 5.1565E-18  | 172.75 |
| YEVVDWN(de)QSTIDCVDPISIAANR                | 2652.2126 | IPI00331032 | IPI00331032 | yes | no  | 2,3   |   | 5.1565E-18  | 172.75 |
| YEQIQN(de)ETR                              | 1179.552  | IPI0015405E | IPI0015405E | yes | no  |       | 2 | 0.0030725   | 147.62 |
| YE(de)TEKNNGAGYFIEHIAFK                    | 2230.0695 | IPI0011188E | IPI0011188E | yes | no  |       | 3 | 2.1393E-12  | 173.51 |
| YDVN(de)RSDSGGSIQIEEGYFVHHFAPENIPTMSK      | 3723.7264 | IPI00312711 | IPI00312711 | yes | no  | 3,4   |   | 6.4432E-20  | 118.42 |
| YDKSEVDGAAAMIN(de)YTHIIMEAVPGHPAIYR        | 3431.6642 | IPI0087485E | IPI0087485E | yes | no  | 3,4   |   | 4.0797E-19  | 139.22 |
| YDIPASINYIIN(de)K                          | 1522.8031 | IPI0012926E | IPI0012926E | yes | yes |       | 2 | 1.0606E-09  | 166.62 |
| YAVYWN(de)SSNPR                            | 1355.6258 | IPI00114364 | IPI00114364 | yes | no  |       | 2 | 0.0022899   | 122.42 |
| YATENDISSIHNSTITCIVN(de)QTTSITGTSPEIMEK    | 3854.819  | IPI0023031E | IPI0023031E | yes | no  | 3,4   |   | 7.6954E-15  | 103.14 |
| YATENDISSIHN(de)STITCIVNQTTSITGTSPEIMEK    | 3854.819  | IPI0023031E | IPI0023031E | yes | no  | 3,4   |   | 7.6954E-15  | 103.14 |
| YAFQEIIIGDISFIPTIN(de)FSK                  | 2415.2726 | IPI00122557 | IPI00122557 | yes | no  |       | 3 | 1.0561E-05  | 139.11 |
| WYDHSN(de)MTFDKWADQDGEDIVDTCGFIYTK         | 3656.55   | IPI0012085E | IPI0012085E | yes | no  |       | 3 | 8.7916E-69  | 210.22 |
| WVITAAHCIIYPPWDKN(de)FTENDIIVR             | 3170.6012 | IPI0011420E | IPI0011420E | yes | yes |       | 3 | 2.7756E-13  | 127.58 |
| WVGN(de)WTYEIK                             | 1294.6346 | IPI0015314E | IPI0015314E | yes | yes |       | 2 | 1.4763E-07  | 169.65 |
| WVDGASINFHWSNGEPN(de)DSR                   | 2374.0363 | IPI00223352 | IPI00223352 | yes | yes | 2,3   |   | 3.2013E-07  | 157.47 |
| WVDGASIN(de)FSHWSNGEPNDSR                  | 2374.0363 | IPI00223352 | IPI00223352 | yes | yes | 2,3   |   | 3.2013E-07  | 157.47 |
| WTGHN(de)VTVVQR                            | 1295.6735 | IPI0011906E | IPI0011906E | yes | yes |       | 2 | 1.7387E-06  | 160.52 |
| WTDNTEYN(de)NTIPIRGEER                     | 2207.0243 | IPI0027643C | IPI0027643C | yes | yes | 2,3   |   | 0.0006569   | 147.07 |
| WTDNTEYN(de)NTIPIR                         | 1735.8166 | IPI0027643C | IPI0027643C | yes | yes |       | 2 | 0.043072    | 67.102 |
| WSN(de)DSATISFTKPSWQK                      | 2038.9749 | IPI0032006E | IPI0032006E | yes | no  |       | 2 | 2.5799E-07  | 161.91 |
| WSFSN(de)GTSWQK                            | 1326.5993 | IPI0031557E | IPI0031557E | yes | yes |       | 2 | 4.8508E-10  | 174.77 |
| WQN(de)DTGSPDKSDISQK                       | 1804.8228 | IPI0022230E | IPI0022230E | yes | yes |       | 2 | 8.3226E-75  | 224.59 |
| WQIHN(de)ISGK                              | 1081.5669 | IPI0098726E | IPI0098726E | yes | no  |       | 2 | 0.01069     | 114.4  |
| WKPPSPDNGN(de)ITHYIVYWER                   | 2471.2022 | IPI0012835E | IPI0012835E | yes | no  |       | 3 | 0.014471    | 87.24  |
| WIQQEFHSN(de)ASIPTHIVTFNVIEK               | 2837.4501 | IPI0062434E | IPI0062434E | yes | yes |       | 3 | 8.3393E-09  | 144.27 |
| WIN(de)ETQIK                               | 1030.5447 | IPI00453524 | IPI00453524 | yes | yes |       | 2 | 0.0002413   | 149.82 |
| WICDGDNDCGNSEDESN(de)ATCSAR                | 2631.9497 | IPI0011906E | IPI0011906E | yes | yes | 2,3   |   | 3.9508E-09  | 140.73 |
| WGHN(de)VTEFQQR                            | 1400.6585 | IPI0075438E | IPI0075438E | yes | yes | 2,3   |   | 1.3503E-06  | 162.38 |
| WGEVDIIGN(de)CSQFYPRDYEK                   | 2638.1798 | IPI0032067E | IPI0032067E | yes | yes | 2,3   |   | 1.9174E-05  | 133.86 |
| WGEVDIIGN(de)CSQFYPR                       | 2054.9156 | IPI0032067E | IPI0032067E | yes | yes |       | 2 | 4.9825E-36  | 196.71 |
| WFHN(de)ESIIPHQDANYVIQSAR                  | 2524.2248 | IPI0016287C | IPI0016287C | yes | yes |       | 3 | 2.9066E-06  | 126.8  |
| WECKN(de)DTIFGIK                           | 1509.7286 | IPI0012618E | IPI0012618E | yes | yes | 2,3   |   | 0.0047107   | 118.87 |
| WASVVVPIGKEQN(de)YTCR                      | 2006.0044 | IPI0010999E | IPI0010999E | yes | no  | 2,3   |   | 0.0038219   | 109.83 |
| WASVVVPIGKEQN(de)YTCHVYHEGIPEPITIR         | 3491.766  | IPI01026927 | IPI01026927 | yes | no  | 3,4   |   | 2.9883E-05  | 89.979 |
| WAAVVVPIGKEQN(de)YTCHVHHK                  | 2472.2485 | IPI00850057 | IPI00850057 | yes | no  | 2,3   |   | 1.4991E-05  | 131.25 |
| VYVYAVN(de)QTR                             | 1211.6299 | IPI00466371 | IPI01026704 | no  | no  |       | 2 | 3.9724E-12  | 178.08 |
| VYTYADTPNDFQISN(de)FSIPEEDTKIKIPIIHQAIAK   | 4048.0833 | IPI00108811 | IPI00108811 | yes | yes |       | 3 | 0.0007131   | 77.322 |
| VYTYADTPNDFQISN(de)FSIPEEDTKIK             | 3034.4448 | IPI00108811 | IPI00108811 | yes | yes |       | 3 | 1.5581E-29  | 179.58 |
| VYTVSSSPSCYMYVYVN(de)TTEVAIEQDIAYIQEIK     | 3962.8846 | IPI00136012 | IPI00136012 | yes | yes |       | 4 | 0.0010248   | 64.726 |
| VYSIPGREN(de)YSSVDANGIQSQMISR              | 2770.3344 | IPI0012710C | IPI0012710C | yes | yes |       | 3 | 6.4552E-18  | 168.84 |
| VYQIDGNYPGSSHVIDHETYIIN(de)ITQANAAGGTPSWKR | 4271.1036 | IPI00137792 | IPI00137792 | yes | yes |       | 4 | 0.024165    | 38.366 |
| VYQIDGNYPGSSHVIDHETYIIN(de)ITQANAAGGTPSWK  | 4115.0025 | IPI00137792 | IPI00137792 | yes | yes | 3,4   |   | 0.0001974   | 72.163 |
| VYN(de)GSVPFEER                            | 1295.6146 | IPI00265291 | IPI00265291 | yes | no  |       | 2 | 1.5991E-15  | 185.25 |
| VYMKN(de)VTVVIR                            | 1320.7588 | IPI0046921E | IPI0046921E | yes | yes | 2,3   |   | 6.1498E-06  | 162.36 |
| VYIN(de)DSVEISR                            | 1778.8799 | IPI0012676E | IPI0012676E | yes | yes |       | 2 | 1.5983E-25  | 188.12 |
| VYIN(de)DSVEISR                            | 1293.6565 | IPI0012676E | IPI0012676E | yes | yes |       | 2 | 1.6706E-14  | 179.35 |
| VYIHPFHIIYHN(de)K                          | 1679.8936 | IPI0065406E | IPI0065406E | yes | yes | 2,3   |   | 2.4614E-06  | 157.78 |
| VYQGQININ(de)ETWSR                         | 1579.7379 | IPI0076260E | IPI0076260E | yes | no  |       | 2 | 4.2547E-19  | 183.89 |
| VYGGIVN(de)QSEINEGTAFFR                    | 2100.0276 | IPI0041628E | IPI0041628E | yes | yes | 2,3   |   | 1.2704E-93  | 229.96 |
| VWVCDRDNDVDSDEPAN(de)CTQMTGCVDEFR          | 3706.4487 | IPI0011906E | IPI0011906E | yes | yes |       | 3 | 4.945E-05   | 87.991 |
| VWPDGVIPFVIGGN(de)FTGSQR                   | 2145.1007 | IPI00125182 | IPI00125182 | yes | no  | 2,3   |   | 0.0016488   | 91.401 |
| VWN(de)STFIEDYKDFDR                        | 1933.8846 | IPI00468674 | IPI00468674 | yes | no  |       | 2 | 3.1316E-07  | 162.46 |
| VWN(de)QTEQEPAAHYHISICFVR                  | 2560.2533 | IPI0012907E | IPI0012907E | yes | no  |       | 3 | 0.0002006   | 100.35 |
| VVTPEEYFN(de)VTIQ                          | 1537.7664 | IPI0013310E | IPI0013310E | yes | no  |       | 2 | 0.015048    | 88.075 |
| VVSVDISFRPIN(de)ETFPVYIETPKR               | 2904.5749 | IPI0062466E | IPI0062466E | yes | yes |       | 3 | 2.0388E-101 | 232.49 |
| VVSVDISFRPIN(de)ETFPVYIETPK                | 2748.4738 | IPI0062466E | IPI0062466E | yes | yes | 2,3,4 |   | 1.6566E-24  | 181.54 |
| VVRPDEIGERPPEDN(de)QSFQYDHEAFIGK           | 3358.5854 | IPI00137831 | IPI00137831 | yes | yes |       | 3 | 0.0006865   | 82.517 |
| VVN(de)VSEIYGTCTK                          | 1565.7759 | IPI0062695C | IPI0062695C | yes | no  |       | 2 | 0.0003631   | 125.67 |
| VVN(de)STTGTGEHIR                          | 1369.695  | IPI0013122E | IPI0013122E | yes | no  |       | 2 | 0.029648    | 76.728 |
| VVMDIPYEIWN(de)ETSAEVADIKK                 | 2549.2723 | IPI0011903E | IPI0011903E | yes | no  | 2,3,4 |   | 3.7511E-06  | 135.86 |
| VVMDIPYEIWN(de)ETSAEVADIK                  | 2421.1774 | IPI0011903E | IPI0011903E | yes | no  |       | 2 | 2.3277E-51  | 208.98 |
| VVIRPFYITN(de)STDMV                        | 1753.9073 | IPI0011980E | IPI0011980E | yes | no  |       | 2 | 0.022734    | 94.532 |
| VVINFN(de)GTSQEIMAVSEHR                    | 2130.0528 | IPI0011118E | IPI0011118E | yes | yes | 2,3   |   | 0.0003849   | 142.26 |
| VVIISGVEPRPPTPQVQTIN(de)ASSEDHKR           | 3200.6942 | IPI0012297E | IPI0012297E | yes | no  |       | 3 | 7.4901E-09  | 104.38 |
| VVIHPN(de)HSVVDIGIHK                       | 1739.0094 | IPI0040914E | IPI0040914E | yes | yes | 2,3,4 |   | 6.0887E-36  | 199.13 |
| VVIAGSN(de)MTICCMSPTK                      | 1867.8664 | IPI0011929E | IPI0011929E | yes | no  |       | 2 | 1.8435E-18  | 178    |
| VVFISPAVPEEPEAYN(de)ITVIIR                 | 2455.3363 | IPI00405742 | IPI00405742 | yes | no  | 2,3,4 |   | 3.2236E-06  | 113.49 |
| VVDGEREN(de)VSMVDYAHNNYQAQSAVPIR           | 3160.4996 | IPI0013474E | IPI0013474E | yes | yes |       | 3 | 0.0004221   | 83.992 |
| VVEGMEYVYFN(de)DTK                         | 1793.8182 | IPI00405742 | IPI00405742 | yes | no  |       | 2 | 2.6113E-08  | 166.9  |
| VTTCHIPQQN(de)ATIYK                        | 1772.888  | IPI00410951 | IPI00410951 | yes | no  |       | 2 | 0.0052644   | 93.237 |
| VTNSNANAAGPIIVAGYN(de)VSGSVR               | 2330.1979 | IPI0022242E | IPI0022242E | yes | yes | 2,3   |   | 3.1985E-69  | 216.67 |
| VTITFATDESGN(de)HTGWK                      | 1862.8799 | IPI0046706E | IPI0046706E | yes | no  |       | 2 | 1.8667E-12  | 173.03 |
| VTINNWWAN(de)KTEGR                         | 1600.8322 | IPI0013664E | IPI0013664E | yes | yes | 2,3   |   | 1.556E-18   | 183.81 |
| VTINNWWAN(de)K                             | 1157.6193 | IPI0013664E | IPI0013664E | yes | yes |       | 2 | 0.0012886   | 155.06 |
| VTIN(de)ESEICAGAEEK                        | 1519.7188 | IPI0011650E | IPI0011650E | yes | no  |       | 2 | 0.0012398   | 130.47 |
| VTIIPN(de)QTHYVVPK                         | 1607.9035 | IPI00742414 | IPI00742414 | yes | no  |       | 2 | 0.011707    | 89.231 |
| VTIDFN(de)ITNPENGPVIDDAIPNSVHGHIPFAK       | 3440.7365 | IPI00466371 | IPI00466371 | yes | yes |       | 3 | 1.08E-19    | 127.83 |
| VTIDFN(de)ITDPENGPVIDDAIPNSVHGHIPFAK       | 3441.7205 | IPI01026704 | IPI01026704 | yes | yes | 3,4   |   | 1.2878E-37  | 180.9  |
| VSTVTIVSATSTAN(de)MTMSPEGR                 | 2340.1301 | IPI0040660E | IPI0040660E | yes | yes |       | 2 | 5.697E-188  | 266.53 |
| VSTIYANN(de)GSVIQGSTVASVYHKK               | 2550.319  | IPI00121114 | IPI00121114 | yes | yes | 2,3   |   | 1.3688E-05  | 101.33 |
| VSTIYANN(de)GSVIQGSTVASVYHK                | 2394.2179 | IPI00121114 | IPI00121114 | yes | yes | 2,3   |   | 2.2612E-55  | 208.92 |
| VSQVIHEGGHN(de)VTKIYESANIPDFRK             | 3050.5938 | IPI00463764 | IPI00463764 | yes | no  | 3,4   |   | 3.3907E-38  | 186.62 |
| VSQVIHEGGHN(de)VTKIYESANIPDFR              | 2922.4988 | IPI00463764 | IPI00463764 | yes | no  |       | 3 | 1.2222E-17  | 163.91 |
| VSQVIHEGGHN(de)VTK                         | 1503.7794 | IPI00463764 | IPI00463764 | yes | no  | 2,3   |   | 2.7794E-05  | 147.56 |
| VSNYIGQAN(de)QSAWITVIPK                    | 2088.1004 | IPI0082868E | IPI0082868E | yes | no  |       | 2 | 1.6571E-06  | 159.8  |



|                                          |           |             |             |     |     |       |               |        |
|------------------------------------------|-----------|-------------|-------------|-----|-----|-------|---------------|--------|
| VSNNGN(de)GSIEIPATVPGYVHSAIHQHGIQDPYYR   | 3688.8386 | IPI00118011 | IPI00118011 | yes | no  | 3,4   | 0.0009971     | 69.578 |
| VSITN(de)VSISDEGR                        | 1375.6943 | IPI00856723 | IPI00856723 | yes | no  |       | 2 4.2165E-122 | 249.33 |
| VSIQEIPGSEHIEMIAN(de)ATTIAYIKR           | 2883.5164 | IPI0012442E | IPI0012442E | yes | yes |       | 3 0.01021     | 59.212 |
| VSIQEIPGSEHIEMIAN(de)ATTIAYIK            | 2727.4153 | IPI0012442E | IPI0012442E | yes | yes | 2,3,4 | 9.282E-10     | 149.33 |
| VSGQMHHMQN(de)ITFQTEASVAQKEK             | 2591.2108 | IPI00312711 | IPI00312711 | yes | no  |       | 3 8.0759E-06  | 103.4  |
| VSFYFFVTSPQN(de)VSDVIPR                  | 2201.1157 | IPI00153202 | IPI00153202 | yes | no  |       | 3 0.012565    | 76.85  |
| VSESEKSQIVN(de)ETHWQYYGTS DTR            | 2843.2998 | IPI0074965E | IPI0074965E | yes | no  |       | 3 1.9561E-09  | 152.13 |
| VRIDPPC(de)TNTTAPS NYINNPYVR             | 2661.2969 | IPI0065853E | IPI0065853E | yes | no  |       | 3 1.5521E-07  | 113.49 |
| VQP IVAVADEGWYIQN(de)K                   | 2042.0837 | IPI00111163 | IPI00111163 | yes | no  | 2,3   | 4.9492E-62    | 218.12 |
| VQGGSSVWGSVITHN(de)SSAIT YQSWGR          | 2763.3365 | IPI00453977 | IPI00453977 | yes | no  | 2,3,4 | 1.1284E-13    | 124.51 |
| VPTREENIQVYN(de)VTK                      | 1788.937  | IPI0085069E | IPI0085069E | yes | yes |       | 2 0.014341    | 100.41 |
| VPNNAIEGIEN(de)ITAIYIHHNEIQEVGSSMR       | 3347.6568 | IPI00120187 | IPI00120187 | yes | yes | 3,4   | 0.0010378     | 69.981 |
| VNYEGGTWDWIAEAISSN(de)HTR                | 2405.1036 | IPI0013458E | IPI0013458E | yes | yes |       | 3 0.0091428   | 74.793 |
| VNRFN(de)STEYQVVTR                       | 1711.8642 | IPI0011906E | IPI0011906E | yes | no  | 2,3   | 9.2685E-47    | 203.11 |
| VNNVTGN(de)FTFVIR                        | 1479.7834 | IPI0039520E | IPI0039520E | yes | no  |       | 2 0.0008865   | 126.63 |
| VNN(de)VTGNFTFVIR                        | 1479.7834 | IPI0039520E | IPI0039520E | yes | no  |       | 2 0.0008865   | 126.63 |
| VNDSVPFHIGWN(de)STER                     | 1856.8806 | IPI0046425E | IPI0046425E | yes | yes | 2,3   | 0.0065508     | 94.09  |
| VNCEERNVTGIEN(de)FTIK                    | 2021.984  | IPI00378224 | IPI00378224 | yes | yes | 2,3   | 1.2896E-17    | 178.51 |
| VNCEERN(de)VTGIENFTIK                    | 2021.984  | IPI00378224 | IPI00378224 | yes | yes | 2,3   | 1.2896E-17    | 178.51 |
| VNASTTDPN(de)STVEQSAITR                  | 1989.9603 | IPI0033878E | IPI0033878E | yes | no  |       | 2 0.0003327   | 139.11 |
| VN(de)SSIHQSISR                          | 1226.6367 | IPI0102780E | IPI0102780E | yes | no  |       | 2 2.067E-51   | 215.72 |
| VN(de)KTEEDYARDSIFVR                     | 1940.9592 | IPI0013310E | IPI0013310E | yes | no  |       | 2 0.0056513   | 117.08 |
| VN(de)KTEEDYAR                           | 1223.5782 | IPI0013310E | IPI0013310E | yes | no  |       | 2 4.6696E-27  | 201.46 |
| VN(de)ITYNYPVR                           | 1237.6455 | IPI0022185E | IPI0022185E | yes | yes |       | 2 0.0016432   | 143.24 |
| VN(de)ISFPSAQSIPASDTHIK                  | 2011.0375 | IPI0062466E | IPI0062466E | yes | yes | 2,3   | 9.231E-06     | 157.47 |
| VN(de)ISAPIPKEDPIFTYISK                  | 2244.2406 | IPI0076177E | IPI0076177E | yes | no  |       | 3 0.0099072   | 87.088 |
| VN(de)GTKEPIEFK                          | 1260.6714 | IPI0034511E | IPI0034511E | yes | no  |       | 2 7.5722E-39  | 204.17 |
| VN(de)GTITQVIIVGAPTHDDVSK                | 2163.1535 | IPI0022571E | IPI0022571E | yes | yes |       | 2 5.0835E-06  | 109.85 |
| VN(de)FTIEASEGCYR                        | 1544.6929 | IPI0034215E | IPI0034215E | yes | no  |       | 2 2.9345E-09  | 162.72 |
| VN(de)DSVPFHIGWNSTER                     | 1856.8806 | IPI0046425E | IPI0046425E | yes | yes | 2,3   | 0.0065508     | 94.09  |
| VN(de)ASTTDPNSTVEQSAITR                  | 1989.9603 | IPI0033878E | IPI0033878E | yes | no  |       | 2 0.0003327   | 139.11 |
| VMSWWDYGYQITAMAN(de)R                    | 2090.9343 | IPI0010910E | IPI0010910E | yes | yes | 2,3   | 3.8646E-19    | 184.22 |
| VMSWWDYGYQIAGMAN(de)R                    | 2046.908  | IPI0031646E | IPI0031646E | yes | yes | 2,3   | 4.3635E-05    | 151.8  |
| VMEIEKEIAN(de)ATTKPEDR                   | 2073.0412 | IPI00461861 | IPI00461861 | yes | yes |       | 3 0.0027194   | 118.55 |
| VME(de)VNFIYVVMSTAAIPMIKQSNNGSIAVISSIAGK | 3754.9712 | IPI0011559E | IPI0011559E | yes | no  | 3,4   | 0.001093      | 64.152 |
| VKPTPPYN(de)ISVTNSEEISSIK                | 2415.2897 | IPI0012015E | IPI0012015E | yes | yes |       | 3 5.5961E-06  | 125.23 |
| VKN(de)STCIDDSWIHPK                      | 1798.8672 | IPI00122584 | IPI00122584 | yes | yes |       | 2 0.024205    | 91.076 |
| VIYIPAYN(de)CTIRPVSK                     | 1893.0182 | IPI00469387 | IPI00469387 | yes | no  |       | 2 0.030221    | 87.148 |
| VIVIITDGEASDKGN(de)ISAAHDITR             | 2494.3027 | IPI0089497E | IPI0089497E | yes | no  |       | 3 0.024149    | 66.325 |
| VITNQESPYQN(de)HTGR                      | 1742.8336 | IPI0012531C | IPI0012531C | yes | no  | 2,3   | 1.7109E-75    | 225.85 |
| VITMANQVITVN(de)ISEEGR                   | 1973.0252 | IPI0098726E | IPI0098726E | yes | yes |       | 2 2.2856E-93  | 231.86 |
| VISNN(de)CTSYGVIDIGK                     | 1738.856  | IPI00331214 | IPI00331214 | yes | yes |       | 2 0.0010264   | 139.29 |
| VISN(de)NCTSYGVIDIGK                     | 1738.856  | IPI00331214 | IPI00331214 | yes | yes |       | 2 0.0010264   | 139.29 |
| VISIAQAHSIN(de)FSCEQVR                   | 2058.0317 | IPI0030899C | IPI0030899C | yes | yes | 2,3   | 8.0248E-08    | 160.8  |
| VIPFN(de)VTDYQCIVR                       | 1722.8763 | IPI0082822E | IPI0082822E | yes | no  |       | 2 0.0039424   | 105.46 |
| VIPEPIHAPNVIDTGHNFAIIN(de)ISSEPYFGDGPBK  | 3770.9308 | IPI00221547 | IPI00221547 | yes | no  | 3,4   | 0.0007636     | 66.378 |
| VINN(de)ITNDIR                           | 1170.6357 | IPI0012817E | IPI0012817E | yes | no  |       | 2 7.6867E-94  | 237.84 |
| VINEECKEN(de)ESINIAAR                    | 1987.9633 | IPI00122411 | IPI00122411 | yes | yes | 2,3   | 0.008208      | 105.28 |
| VINDTWAWKN(de)ATIAEQAK                   | 2058.0534 | IPI0012334E | IPI0012334E | yes | yes | 2,3   | 1.3733E-26    | 192.6  |
| VINADQGSATVQMIIN(de)DTCPIFVR             | 2762.3731 | IPI0032006E | IPI0032006E | yes | yes | 2,3   | 3.2994E-09    | 121.62 |
| VIN(de)STGH DVAR                         | 1167.5996 | IPI0084914E | IPI0084914E | yes | no  |       | 2 0.0005585   | 144.1  |
| VIN(de)ITDNTYFK                          | 1326.682  | IPI00130117 | IPI00130117 | yes | yes |       | 2 2.1882E-39  | 203.61 |
| VIN(de)ISHSIIDISSEQIFDGIPAIQHINIQGNHFPK  | 3894.0428 | IPI0034356E | IPI0034356E | yes | yes |       | 4 0.0017001   | 54.732 |
| VIN(de)DTWAWKNATIAEQAK                   | 2058.0534 | IPI0012334E | IPI0012334E | yes | yes | 2,3   | 1.3733E-26    | 192.6  |
| VIN(de)DTWAWK                            | 1131.5713 | IPI0012334E | IPI0012334E | yes | yes |       | 2 0.014156    | 118.71 |
| VIIIRPYITPNNQGIYIFQGN(de)STVR            | 2762.4868 | IPI0031950E | IPI0031950E | yes | yes | 2,3,4 | 1.3985E-32    | 188.24 |
| VIIQSQPIGTIKHN(de)MTYFCK                 | 2490.3127 | IPI0010800E | IPI0010800E | yes | no  |       | 3 0.0002235   | 106.93 |
| VIINFFVGTDDKN(de)STQHIIHFDQPR            | 2940.4882 | IPI00461861 | IPI00461861 | yes | no  |       | 3 2.6536E-07  | 109.05 |
| VIIN(de)ITTVAANHG YTK                    | 1713.9414 | IPI0046760C | IPI0046760C | yes | no  |       | 2 1.1759E-35  | 195.6  |
| VIIIDPAISGN(de)ETEPYPAFTR                | 2415.2686 | IPI0084869E | IPI0084869E | yes | yes | 2,3   | 2.8227E-65    | 217.17 |
| VIHIQFNSISSITDDTFCKAN(de)DTR             | 2781.3392 | IPI0012084E | IPI0012084E | yes | yes |       | 3 1.5724E-08  | 128.41 |
| VIFYKDDAMVYN(de)VTSR                     | 1919.9451 | IPI00406901 | IPI00406901 | yes | no  | 2,3   | 6.2346E-08    | 167.89 |
| VIETIPANYSIN(de)SSKK                     | 1762.9465 | IPI0048053E | IPI0048053E | yes | no  |       | 2 0.017676    | 82.102 |
| VIETIPAN(de)YSINSSKK                     | 1762.9465 | IPI0048053E | IPI0048053E | yes | no  |       | 2 0.017676    | 82.102 |
| VIENEKFDTHEYHN(de)ESR                    | 2145.9716 | IPI0046349E | IPI0046349E | yes | yes | 2,3   | 8.6859E-92    | 232.15 |
| VIEHYN(de)YTKETIDMQETT SR                | 2457.1482 | IPI0012862E | IPI0012862E | yes | yes |       | 3 0.0001258   | 140.89 |
| VIEEPKN(de)VSCETR                        | 1559.7614 | IPI00118291 | IPI00118291 | yes | no  |       | 2 0.010531    | 110.51 |
| VIDIW DIAQSAN(de)FTEKEIESFREEIK          | 3109.5608 | IPI00469307 | IPI00469307 | yes | no  |       | 3 0.0007302   | 84.946 |
| VIDIW DIAQSAN(de)FTEK                    | 1848.9258 | IPI00469307 | IPI00469307 | yes | no  | 2,3   | 3.0135E-08    | 166.77 |
| VIAQHQNIIIFAN(de)SSSSMR                  | 2002.0054 | IPI0031904C | IPI0031904C | yes | no  | 2,3   | 0.0031435     | 99.044 |
| VHSHGNN(de)YTIICQVK                      | 1768.8679 | IPI00118291 | IPI00118291 | yes | no  |       | 2 0.0012576   | 118.52 |
| VHSGN(de)FSTIPQYFK                       | 1623.8045 | IPI01023131 | IPI01023131 | yes | no  |       | 2 0.0010139   | 119.96 |
| VHITVCN(de)ITSR                          | 1298.6765 | IPI0012886E | IPI0012886E | yes | no  |       | 2 0.008318    | 103.44 |
| VHGPN(de)ASHYTSIMTMITWER                 | 2330.0936 | IPI00169617 | IPI00169617 | yes | yes |       | 3 4.8298E-05  | 107.57 |
| VGYSQSN(de)ISCFFR                        | 1604.7406 | IPI0046425E | IPI0046425E | yes | yes |       | 2 3.5326E-09  | 161.48 |
| VGVNKN(de)QTVTATFGYPFR                   | 1998.0323 | IPI0011425E | IPI0011425E | yes | no  | 2,3   | 7.4296E-62    | 219.23 |
| VGDEYQEIQIDGFDN(de)ESSNKTWMK             | 2832.2549 | IPI00114671 | IPI00114671 | yes | no  |       | 3 1.5283E-07  | 111.49 |
| VGCSEYTN(de)R                            | 1084.4608 | IPI0037764E | IPI0037764E | yes | yes |       | 2 0.0084774   | 125.97 |
| VGATAAVYSAAIIEYITAEVIEIAGN(de)ASK        | 2894.5277 | IPI0055505E | IPI0055505E | yes | no  | 2,3   | 2.4986E-85    | 165.62 |
| VFVYTPPTN(de)YTIR                        | 1573.814  | IPI0012442E | IPI0012442E | yes | yes |       | 2 1.186E-85   | 228.78 |
| VFPYISVMVNN(de)GSISYDHSKDGR              | 2584.238  | IPI00321634 | IPI00321634 | yes | yes | 2,3   | 4.6757E-08    | 142.88 |
| VFPYISVMVNN(de)GSISYDHSK                 | 2256.0885 | IPI00321634 | IPI00321634 | yes | yes | 2,3   | 9.2159E-10    | 166.47 |
| VFPYISAMVNN(de)GSISYDHER                 | 2298.0739 | IPI0083035E | IPI0083035E | yes | no  |       | 2 1.1099E-05  | 132.59 |
| VFNGKDN(de)ISK                           | 1120.5877 | IPI00331214 | IPI00331214 | yes | yes |       | 2 0.000242    | 165.63 |
| VFKTN(de)STQVSDVR                        | 1479.7682 | IPI0046942E | IPI0046942E | yes | no  |       | 2 0.018424    | 104.55 |
| VFKPQSGADAIN(de)DSQDFPFPEPAK             | 2705.2973 | IPI0046246E | IPI0046246E | yes | no  |       | 3 1.4202E-05  | 101.75 |

|                                            |           |             |             |     |     |     |              |        |
|--------------------------------------------|-----------|-------------|-------------|-----|-----|-----|--------------|--------|
| VFIVPVGN(de)HSNIPFSR                       | 1781.9577 | IPI0022141E | IPI0022141E | yes | no  | 2,3 | 0.0013747    | 115.82 |
| VFHIHN(de)ESWVIITPK                        | 1818.9781 | IPI00224752 | IPI00224752 | yes | yes |     | 2 1.1708E-91 | 229.97 |
| VFGSQN(de)ITTVK                            | 1192.6452 | IPI00123342 | IPI00123342 | yes | yes |     | 2 5.6639E-40 | 209.19 |
| VFDIHNMGSVN(de)VSVGCTPAQIETSR              | 2958.4328 | IPI00116913 | IPI00116913 | yes | no  |     | 3 0.0006604  | 79.36  |
| VETGVKPGMVVTFAPVN(de)VTTEVK                | 2514.3767 | IPI00307837 | IPI00307837 | yes | yes | 2,3 | 3.3233E-05   | 103.02 |
| VDVIVAN(de)ITVTDKQDQPTPAWNAAYR             | 2893.4723 | IPI00323134 | IPI00323134 | yes | no  |     | 3 1.2734E-23 | 176.67 |
| VDIPQQPMGIIAVAN(de)DTNSCEISPCR             | 2884.3517 | IPI00119063 | IPI00119063 | yes | yes |     | 3 6.8677E-11 | 113.31 |
| VDIEDFEN(de)NTAYAK                         | 1627.7366 | IPI0055116E | IPI0055116E | yes | no  |     | 2 4.3461E-25 | 296.22 |
| VDFIWHPEVN(de)GSMK                         | 1657.7923 | IPI0038029E | IPI0038029E | yes | yes |     | 2 0.0004504  | 125.61 |
| VDDEMPQHAVISGPNIFINNINKTDN(de)GTYR         | 3371.6205 | IPI00856723 | IPI00856723 | yes | no  | 3,4 | 3.9371E-19   | 148.89 |
| VDDEMPQHAVISGPNIFINNIN(de)KTDNGTYR         | 3371.6205 | IPI00856723 | IPI00856723 | yes | no  | 3,4 | 3.9371E-19   | 148.89 |
| VAGIIVIN(de)YSNDYNHWIATK                   | 2290.1746 | IPI0011190E | IPI0011190E | yes | no  | 2,3 | 3.1173E-38   | 195.77 |
| VAEVENGTKPDSVPEHCIDTWSFDAATMDHN(de)GTMIFFK | 4410.9508 | IPI00128484 | IPI00128484 | yes | yes |     | 4 0.0003625  | 69.7   |
| VAEVEN(de)GTKPDSVPEHCIDTWSFDAATMDHNGTMIFFK | 4410.9508 | IPI00128484 | IPI00128484 | yes | yes |     | 4 0.0003625  | 69.7   |
| TV(de)VTEAGNIKDQATQEEIHYIEK                | 2827.4604 | IPI0092832C | IPI0092832C | yes | no  |     | 3 6.8221E-10 | 153.65 |
| TTIVDNNTWN(de)NSHIAIVGK                    | 2096.0651 | IPI0031646E | IPI0031646E | yes | yes |     | 2 4.2201E-08 | 160.45 |
| TQITCSIN(de)SSGVDIVGHR                     | 1942.9531 | IPI0040849E | IPI0040849E | yes | no  | 2,3 | 0.0015096    | 102.57 |
| TITIIN(de)VTR                              | 1029.6182 | IPI0010853E | IPI0010853E | yes | no  |     | 2 2.248E-11  | 177.78 |
| TIIVDNNTWN(de)NTHISR                       | 1896.9442 | IPI0010910E | IPI0010910E | yes | yes |     | 2 9.5323E-92 | 228.9  |
| TIIVDN(de)NTWNNTHISR                       | 1896.9442 | IPI0010910E | IPI0010910E | yes | yes |     | 2 9.5323E-92 | 228.9  |
| TIIGYYN(de)QSAGGHTTIQWMYGCDVGS DGR         | 3206.4186 | IPI0010999E | IPI0010999E | yes | yes |     | 3 2.7361E-07 | 94.73  |
| TIGISPFHEFADVFTAN(de)DSGHR                 | 2516.2084 | IPI0012756C | IPI0012756C | yes | yes |     | 3 0.0001185  | 93.269 |
| TGRVYN(de)VTQHAMIIVNKQVK                   | 2355.2845 | IPI0046819E | IPI0046819E | yes | no  |     | 3 0.0026446  | 97.095 |
| TEIDIRPQGIAIFSN(de)VSEAR                   | 2215.1597 | IPI00122973 | IPI00122973 | yes | no  |     | 3 0.0009651  | 101.67 |
| TAASIIWQAYPIIN(de)ISEK                     | 2017.0884 | IPI00115867 | IPI00115867 | yes | yes |     | 3 0.0003959  | 147.07 |
| STIIHHPQYAWIQDIGIREDNEGVYNG(de)SWGGR       | 3780.8397 | IPI00230084 | IPI00230084 | yes | no  |     | 4 0.0095609  | 65.275 |
| SN(de)VTRPSEFNWIPIPIFIK                    | 2491.3264 | IPI0031950E | IPI0031950E | yes | no  |     | 3 0.030479   | 75.97  |
| SIKQININ(de)ISAPIMSR                       | 1670.9138 | IPI00123881 | IPI00123881 | yes | no  |     | 3 0.016471   | 97.551 |
| SIIDHIHVGVRDN(de)VSQPK                     | 2070.097  | IPI0012342E | IPI0012342E | yes | no  |     | 2 0.0003152  | 126    |
| RYIKNG(de)NATIIR                           | 1417.8154 | IPI0098582E | IPI0098582E | yes | no  | 2,3 | 0.019075     | 111.52 |
| RYIK(de)NGNATIIR                           | 1417.8154 | IPI0098582E | IPI0098582E | yes | no  | 2,3 | 0.019075     | 111.52 |
| RYIEIG(de)NETIIR                           | 1475.8096 | IPI00850057 | IPI00850057 | yes | no  | 2,3 | 4.2192E-52   | 212.9  |
| RVNDN(de)KTAAEEAIR                         | 1585.8172 | IPI0102780E | IPI0102780E | yes | no  |     | 2 1.6943E-05 | 158.52 |
| RVM(de)EVNFISYVVMSTAAIPMIKQSNISIAVISSIAGK  | 3911.0723 | IPI0011559E | IPI0011559E | yes | no  |     | 4 0.0003825  | 63.412 |
| RVYIPAY(de)NCTIRPVSK                       | 2049.1194 | IPI00469387 | IPI00469387 | yes | no  | 2,3 | 2.4355E-07   | 164.53 |
| RSPGAQDN(de)VSVSQGM                        | 1687.806  | IPI0034858E | IPI0034858E | yes | no  |     | 3 0.0022957  | 117.08 |
| RSN(de)FTPATNEAPQATVFPK                    | 2075.0436 | IPI0017203E | IPI0017203E | yes | no  |     | 3 0.0003489  | 119.46 |
| RQDPVSWN(de)KTFEDISR                       | 1976.9704 | IPI0084869E | IPI0084869E | yes | yes |     | 3 0.007841   | 110.04 |
| RPFVVYEMEVDTIETTCHADPTPIAN(de)CSVR         | 3676.7324 | IPI0012824E | IPI0012824E | yes | yes | 3,4 | 1.7446E-08   | 96.505 |
| RNPSANTFIHIN(de)ASSFR                      | 1930.9762 | IPI0031553E | IPI0031553E | yes | yes | 2,3 | 0.0003803    | 143.67 |
| RN(de)WTINRINGDFAQINIK                     | 2172.1552 | IPI00323134 | IPI00323134 | yes | no  |     | 3 0.0034071  | 140.74 |
| RN(de)WTEVEVR                              | 1189.584  | IPI0013439C | IPI0013439C | yes | yes |     | 2 0.015127   | 123.63 |
| RN(de)FTAADWGHRSR                          | 1416.6647 | IPI0033988E | IPI0033988E | yes | no  | 2,3 | 0.0070091    | 106.58 |
| RMHIN(de)GSNVQVIHR                         | 1659.874  | IPI00119063 | IPI00119063 | yes | yes | 2,3 | 4.0391E-47   | 203.87 |
| RIYAGMVSIMDEAVGN(de)VTK                    | 2053.0336 | IPI0065235E | IPI0065235E | yes | no  |     | 2 0.044985   | 50.883 |
| RIPVTN(de)ISQIHK                           | 1404.8201 | IPI0046942E | IPI0046942E | yes | no  |     | 3 0.013595   | 97.463 |
| RIGAI(de)NNSIIIEDR                         | 1695.9632 | IPI0011551E | IPI0011551E | yes | no  | 2,3 | 0.0010219    | 140.27 |
| RIAVDWESIGYN(de)ITR                        | 1791.9268 | IPI0012304C | IPI0012304C | yes | no  |     | 3 0.0009567  | 130.2  |
| RHEEGHMIN(de)CTCFGQGR                      | 2087.8836 | IPI0011353E | IPI0011353E | yes | no  | 2,3 | 0.0010876    | 121.13 |
| RGVFITN(de)ETGQPIIGK                       | 1728.9523 | IPI0011196C | IPI0011196C | yes | no  | 2,3 | 5.9231E-60   | 212.11 |
| RGTFTDCAIAN(de)MTQQR                       | 1981.9462 | IPI00621027 | IPI00621027 | yes | no  |     | 3 0.0013412  | 140.96 |
| RGPECSQN(de)YTAPTGVK                       | 1876.9101 | IPI0012399E | IPI0012399E | yes | yes | 2,3 | 6.4961E-05   | 153.94 |
| RGDDIYTN(de)VTVSIVEAIVGFEMDITHIDGHK        | 3443.7031 | IPI00320241 | IPI00320241 | yes | yes |     | 4 3.1265E-19 | 118.85 |
| RGCKDN(de)ATDSVPIR                         | 1587.7787 | IPI00119063 | IPI00119063 | yes | yes |     | 2 0.0093796  | 135.02 |
| RFHSDIN(de)ISESIIPAVIEK                    | 2167.1637 | IPI00831484 | IPI00831484 | yes | yes | 2,3 | 0.0004037    | 116.96 |
| RFANEYPN(de)ITR                            | 1379.6946 | IPI00130573 | IPI00130573 | yes | yes |     | 2 0.020613   | 93.011 |
| RDQGN(de)VTDMASMK                          | 1451.6497 | IPI00471081 | IPI00471081 | yes | yes |     | 3 0.0015438  | 129.37 |
| RDDYRPTWTI(de)NQTEPVAGNYYPVNTR             | 3125.4955 | IPI00381303 | IPI00381303 | yes | yes |     | 3 1.5893E-12 | 134.81 |
| RDDIHTIPAGQYFIN(de)ITYNYPVHSFDGR           | 3405.6531 | IPI0038731E | IPI0038731E | yes | no  | 3,4 | 5.8108E-76   | 214.16 |
| ratio                                      | 1.04%     |             |             |     |     |     |              |        |
| RAN(de)ASTFAVPSPVNSADTR                    | 2047.0083 | IPI0011906E | IPI0011906E | yes | yes |     | 3 0.0031248  | 89.344 |
| RADIN(de)GSNMETVIGHGK                      | 1910.9632 | IPI0041114E | IPI0041114E | yes | no  |     | 3 0.02227    | 79.837 |
| QVVEN(de)MTR                               | 975.48076 | IPI0011196C | IPI0011196C | yes | no  |     | 2 0.029357   | 121.09 |
| QVTPIFFYFQN(de)R                           | 1558.7932 | IPI0031950E | IPI0031950E | yes | no  | 2,3 | 0.0070583    | 136.48 |
| QVN(de)GSVSGSQWNK                          | 1389.6637 | IPI0040885C | IPI0040885C | yes | yes |     | 2 0.026662   | 79.089 |
| QVEIIEYPYHEQIIVVAPEIITGHN(de)YTIK          | 3463.8028 | IPI00223987 | IPI00223987 | yes | yes | 3,4 | 1.6843E-19   | 121.58 |
| QVEIIVN(de)HTGIR                           | 1506.8154 | IPI00263041 | IPI00263041 | yes | yes |     | 2 0.019808   | 84.468 |
| QVAIQTFGN(de)QTSIIPAGGAGYK                 | 2220.1539 | IPI0022871E | IPI0022871E | yes | yes | 2,3 | 0            | 312.9  |
| QTTAMDFSAN(de)ETVCWVHVGDSAAQTQIK           | 3257.4758 | IPI00119063 | IPI00119063 | yes | no  | 3,4 | 0.0056716    | 56.298 |
| QTQVGIVQYGAN(de)VTHEFNINK                  | 2359.1921 | IPI00466371 | IPI01026704 | no  | no  | 2,3 | 7.5699E-10   | 162.09 |
| QSQPVHIIPMNETDHINMVFSN(de)K                | 2678.2945 | IPI0013350C | IPI0013350C | yes | yes |     | 3 0.0062407  | 73.783 |
| QSQPVHIIPMN(de)ETDHINMVFSNK                | 2678.2945 | IPI0013350C | IPI0013350C | yes | yes |     | 3 0.0062407  | 73.783 |
| QSN(de)GSIAVISSIAGK                        | 1430.7729 | IPI0011559E | IPI0011559E | yes | no  |     | 2 7.1086E-56 | 207.79 |
| QRYN(de)ITAK                               | 992.54033 | IPI00130661 | IPI00130661 | yes | yes |     | 2 8.8701E-07 | 189.7  |
| QQGGQVTIIVQEAYKQYN(de)ATINR                | 2734.4402 | IPI00757554 | IPI00757554 | yes | yes |     | 2 0.0044561  | 76.817 |
| QQCIEEAQIEN(de)ETTGCSK                     | 2123.9099 | IPI00128984 | IPI00128984 | yes | yes |     | 2 1.11E-18   | 179.1  |
| QPIYIN(de)CSCVTGGSASAK                     | 1911.8819 | IPI0030924E | IPI0030924E | yes | yes |     | 2 0.000511   | 118.48 |
| QNFSN(de)ITVSTEDQVK                        | 1708.8268 | IPI00129677 | IPI00129677 | yes | no  |     | 2 0          | 308    |
| QN(de)FSNITVSTEDQVK                        | 1708.8268 | IPI00129677 | IPI00129677 | yes | no  |     | 2 0          | 308    |
| QMWKSPN(de)GTIRNIIGGTVFR                   | 2274.2055 | IPI00135231 | IPI00135231 | yes | no  |     | 3 0.029852   | 71.263 |
| QMAIN(de)ATYIFNGITVSIPIGMEK                | 2397.2072 | IPI0031635E | IPI0031635E | yes | no  |     | 3 0.015757   | 59.585 |
| QKNVNISYI(de)VNSDFFPQRPEK                  | 2522.2918 | IPI00122557 | IPI00122557 | yes | no  | 2,3 | 1.0333E-05   | 158.58 |
| QKN(de)VNISYIVNSDFFPQRPEK                  | 2522.2918 | IPI00122557 | IPI00122557 | yes | no  | 2,3 | 1.0333E-05   | 158.58 |
| QIN(de)ITTEDDDIYHMTVPYGRPR                 | 2633.2544 | IPI00265291 | IPI00265291 | yes | yes |     | 3 1.9708E-05 | 117.2  |
| QIN(de)ISIIVK                              | 1026.6437 | IPI0011511E | IPI0011511E | yes | yes |     | 2 0.019594   | 113.62 |
| QIMN(de)TSFNPIRIVNTYGAFGSVTK               | 2657.3636 | IPI00405437 | IPI00405437 | yes | no  |     | 3 0.017877   | 65.855 |

|                                        |           |             |             |     |     |     |               |        |
|----------------------------------------|-----------|-------------|-------------|-----|-----|-----|---------------|--------|
| QIITEEKIPN(de)NTQWITWSPEGHK            | 2748.3871 | IPI00125813 | IPI00125813 | yes | no  | 2,3 | 6.4227E-42    | 199.99 |
| QIIQTQVASPAIHPPVSYN(de)DTAPR           | 2602.3503 | IPI00128989 | IPI00128989 | yes | no  |     | 3 0.0082142   | 64.203 |
| QIINAIQIN(de)NTAVGHAIVIPARR            | 2481.4292 | IPI00830749 | IPI00830749 | yes | yes |     | 3 8.0196E-08  | 111.33 |
| QIINAIQIN(de)NTAVGHAIVIPAR             | 2325.3281 | IPI00830749 | IPI00830749 | yes | yes |     | 3 0.0001565   | 99.021 |
| QIIAN(de)SSAIEETIIGHQGR                | 2036.0651 | IPI00116913 | IPI00116913 | yes | no  | 2,3 | 0.0023993     | 147.16 |
| QIGASPSDDIIFGVFAQSKPDSAEPVN(de)R       | 2944.4567 | IPI0013042C | IPI0013042C | yes | no  |     | 3 0.0034386   | 75.054 |
| QIFFN(de)GTETIR                        | 1324.6776 | IPI00338209 | IPI00338209 | yes | no  |     | 2 0.017728    | 99.752 |
| QHGQFSIAVVGIN(de)ITSIGIR               | 2109.1695 | IPI0012119C | IPI0012119C | yes | no  |     | 3 1.9284E-05  | 113.33 |
| QGPQAGGTTITIN(de)GTHIDTGSKEDVR         | 2652.3103 | IPI00405742 | IPI00405742 | yes | no  |     | 3 0.0005357   | 85.932 |
| QGPQAGGTTITIN(de)GTHIDTGSK             | 2153.0713 | IPI00405742 | IPI00405742 | yes | no  |     | 2 0.0052563   | 92.932 |
| QGDQYSCMVGHEAIPMN(de)FTQK              | 2440.061  | IPI0047388C | IPI0047388C | yes | no  | 2,3 | 6.0259E-06    | 120.75 |
| QFWIFDVQNPDDVAKN(de)SSK                | 2237.0753 | IPI00331214 | IPI00331214 | yes | yes | 2,3 | 1.3492E-14    | 139.67 |
| QFNCSFEN(de)ITR                        | 1414.6299 | IPI0067425E | IPI0067425E | yes | yes |     | 2 0.0034392   | 122.33 |
| QFN(de)CSFENITR                        | 1414.6299 | IPI0067425E | IPI0067425E | yes | yes |     | 2 0.0034392   | 122.33 |
| QENNIINAHEGNSSIFIEN(de)STFESFGYHSVSPDR | 4064.9141 | IPI00125813 | IPI00125813 | yes | no  | 3,4 | 0.0073715     | 49.504 |
| QEMNGTYVCHAFSSHGN(de)VTR               | 2293.9957 | IPI00122973 | IPI00122973 | yes | no  |     | 3 0.022373    | 58.712 |
| QEIN(de)DSIQVAER                       | 1400.6896 | IPI0032042C | IPI0032042C | yes | yes |     | 2 1.4657E-29  | 199.8  |
| QDIAISGN(de)ISSIYAMTQDK                | 2053.999  | IPI00405742 | IPI00405742 | yes | no  |     | 2 4.797E-113  | 244.52 |
| QAIQTMQSEFFYITTNIN(de)DTIEIR           | 2988.4903 | IPI0011813C | IPI0011813C | yes | yes |     | 3 9.6048E-24  | 127.8  |
| PINETFPVYIE(de)TPKR                    | 1902.0251 | IPI00624663 | IPI00624663 | yes | yes | 2,3 | 1.4076E-35    | 196.95 |
| PINETFPVYIE(de)TPK                     | 1745.924  | IPI00624663 | IPI00624663 | yes | yes |     | 2 0.015225    | 82.349 |
| PIN(de)ITDESMFIGTYIIECIPGYIKR          | 3202.6083 | IPI00138061 | IPI00138061 | yes | no  |     | 3 1.2969E-13  | 124.66 |
| PGAASN(de)ISFQAPFR                     | 1461.7365 | IPI0031115E | IPI0031115E | yes | yes |     | 2 0.0029933   | 108.71 |
| PFFIQN(de)SSMMK                        | 1441.7098 | IPI0022622E | IPI0022622E | yes | no  |     | 2 0.0040663   | 101.39 |
| NYTAN(de)ATSSREEAWDYVQAQVK             | 2530.1724 | IPI0010809E | IPI0010809E | yes | no  | 2,3 | 5.2182E-38    | 155.94 |
| NYN(de)FTIACNTK                        | 1344.6132 | IPI0032257E | IPI0032257E | yes | no  |     | 2 4.5977E-10  | 174.9  |
| NYKNPN(de)ITISFTAER                    | 1766.8951 | IPI0013260C | IPI0013260C | yes | no  | 2,3 | 0.0027776     | 122.63 |
| NYFHYN(de)QSFPPSYNIK                   | 2017.9323 | IPI0012926E | IPI0012926E | yes | yes | 2,3 | 1.1708E-12    | 175.26 |
| NYEVQIFHVN(de)ATVTEEGTGIEFSR           | 2739.314  | IPI00123223 | IPI00123223 | yes | yes |     | 3 1.2783E-16  | 125.92 |
| NVNISYTVN(de)DSFFPQRPQKIIANK           | 2792.461  | IPI0038117E | IPI0038117E | yes | yes |     | 3 9.7478E-09  | 127.17 |
| NVNISYTVN(de)DSFFPQRPQK                | 2253.1178 | IPI0038117E | IPI0038117E | yes | yes | 2,3 | 0             | 331.34 |
| NVNISYTVN(de)DSFFPQR                   | 1899.9115 | IPI0038117E | IPI0038117E | yes | yes |     | 2 0.0054037   | 91.355 |
| NVNISYIVN(de)DSFFPQRPEK                | 2266.1382 | IPI00122557 | IPI00122557 | yes | no  | 2,3 | 3.4602E-93    | 231.86 |
| NVNI(de)SYTVNDSFFPQRPQKIIANK           | 2792.461  | IPI0038117E | IPI0038117E | yes | yes |     | 3 9.7478E-09  | 127.17 |
| NVNI(de)SYTVNDSFFPQRPQK                | 2253.1178 | IPI0038117E | IPI0038117E | yes | yes | 2,3 | 0             | 331.34 |
| NVNI(de)SYTVNDSFFPQR                   | 1899.9115 | IPI0038117E | IPI0038117E | yes | yes |     | 2 0.0054037   | 91.355 |
| NVN(de)ISYIVNDSFFPQRPEK                | 2266.1382 | IPI00122557 | IPI00122557 | yes | no  | 2,3 | 3.4602E-93    | 231.86 |
| NVAIVAGDTGN(de)ATGIGEQQPTR             | 2097.0451 | IPI00122272 | IPI00122272 | yes | no  |     | 2 0           | 320.86 |
| NTQADVINASWSVISN(de)STRHEIER           | 2726.3372 | IPI0013218E | IPI0013218E | yes | yes |     | 3 1.3873E-08  | 130.11 |
| NTQADVINASWSVISN(de)STR                | 2062.0079 | IPI0013218E | IPI0013218E | yes | yes |     | 2 1.3437E-26C | 289.76 |
| NTQADVIN(de)ASWSVISNSTRHEIER           | 2726.3372 | IPI0013218E | IPI0013218E | yes | yes |     | 3 1.3873E-08  | 130.11 |
| NTQADVIN(de)ASWSVISNSTR                | 2062.0079 | IPI0013218E | IPI0013218E | yes | yes |     | 2 1.3437E-26C | 289.76 |
| NTGEIN(de)ITSIIDREETPYFIITGYAIDSR      | 3300.6514 | IPI00115793 | IPI00115793 | yes | no  |     | 3 2.7147E-11  | 109.68 |
| N-te)rminal Se)r/Thr                   |           | 16          |             |     |     |     |               |        |
| NTDGTYNYTSIFIVN(de)SSAHR               | 2259.0556 | IPI0012915E | IPI0012915E | no  | no  |     | 3 0.011       | 79.514 |
| NTDGTYN(de)YTSIFIVNSSAHR               | 2259.0556 | IPI0012915E | IPI0012915E | no  | no  |     | 3 0.011       | 79.514 |
| NSS(de)JGGVINKYDVVIR                   | 1732.9472 | IPI00314673 | IPI00314673 | yes | yes |     | 2 0.0001232   | 154.88 |
| NSQFDMN(de)STDAIAIK                    | 1582.7297 | IPI00346062 | IPI00346062 | yes | yes |     | 2 1.41E-18    | 177.38 |
| NSNSN(de)VIQVDQSGIGIPSRDYYINKTENEK     | 3381.6437 | IPI0039684C | IPI0039684C | yes | no  |     | 3 2.3468E-07  | 94.955 |
| NQIVEI(de)EKVVHHPNHSVVDIGIIK           | 2692.5276 | IPI0040914E | IPI0040914E | yes | yes |     | 3 9.2365E-51  | 148.01 |
| NPSANTFIHINA(de)SSFR                   | 1774.8751 | IPI0031553E | IPI0031553E | yes | yes | 2,3 | 4.0686E-12    | 170.09 |
| NPNN(de)NTIHPNIR                       | 1402.7066 | IPI0031950E | IPI0031950E | yes | no  |     | 2 5.716E-11   | 173.72 |
| NPEDVQSPN(de)GSVYTWIR                  | 1847.8438 | IPI00112614 | IPI00112614 | yes | yes |     | 2 1.233E-05   | 158.29 |
| NPCTSEQN(de)CTSPFSYK                   | 1918.7826 | IPI00132474 | IPI00132474 | yes | yes |     | 2 5.5871E-111 | 244.05 |
| NPCNITREDY(de)APIVK                    | 1788.8829 | IPI0030796E | IPI0030796E | yes | yes | 2,3 | 0.010105      | 107.46 |
| NNIHFPGHN(de)YTTR                      | 1569.7437 | IPI00130271 | IPI00130271 | yes | no  |     | 2 0.0008836   | 136.27 |
| NNDSTIN(de)NSATTIIGIQDCR               | 2319.1125 | IPI0088174E | IPI0088174E | yes | no  |     | 2 6.1938E-06  | 130.83 |
| NN(de)QTECFNHVR                        | 1417.6157 | IPI0012466E | IPI0012466E | yes | no  |     | 2 0.0013743   | 129.34 |
| NN(de)ISREISEIK                        | 1301.6939 | IPI0094476C | IPI0094476C | yes | no  |     | 2 0.027347    | 113.69 |
| NN(de)DSTINNSATTIIGIQDCR               | 2319.1125 | IPI0088174E | IPI0088174E | yes | no  |     | 2 6.1938E-06  | 130.83 |
| NMICQWDPGRETYIETN(de)YTIK              | 2631.2098 | IPI0012015E | IPI0012015E | yes | yes |     | 3 2.8746E-05  | 122.44 |
| NKANIQFGEN(de)GTTISAVTNK               | 2106.0705 | IPI00127447 | IPI00127447 | yes | yes | 2,3 | 1.3227E-50    | 211.06 |
| NITVIEPVTQPFIQVTN(de)TTVK              | 2341.2893 | IPI0010853E | IPI0010853E | yes | no  | 2,3 | 1.1593E-06    | 153.36 |
| NITAFN(de)ETIFR                        | 1324.6776 | IPI0012470C | IPI0012470C | yes | yes |     | 2 2.6847E-97  | 237.53 |
| NISTCFSSGDIFAAHN(de)ISER               | 2225.0171 | IPI0012342E | IPI0012342E | yes | no  |     | 2 1.0825E-05  | 127.58 |
| NISFACNPGFFIN(de)GTSSSK                | 2046.9469 | IPI00322463 | IPI00322463 | yes | no  |     | 2 1.8528E-93  | 230.06 |
| NISFACNPG(de)FFINGTSSSK                | 2046.9469 | IPI00322463 | IPI00322463 | yes | no  |     | 2 1.8528E-93  | 230.06 |
| NIQAVNEIATISQCN(de)DTSSAAMVQCIR        | 3106.4846 | IPI00138342 | IPI00138342 | yes | no  |     | 3 2.9238E-05  | 90.1   |
| NIPWYVIAGNHDHIGN(de)VSAQIAYSK          | 2766.3878 | IPI00137491 | IPI00137491 | yes | yes | 2,3 | 8.4642E-19    | 173.18 |
| NIN(de)VTSIGFR                         | 1119.6037 | IPI00468814 | IPI00468814 | yes | yes |     | 2 0.0024221   | 134.3  |
| NIN(de)SSCRPHPGAWIR                    | 1763.8638 | IPI0022280E | IPI0022280E | yes | no  | 2,3 | 0.004996      | 117.86 |
| NIMTIVHFYN(de)K                        | 1378.7067 | IPI00119822 | IPI00119822 | yes | no  |     | 2 0.0061771   | 113.22 |
| NIMIDIQKDTAV(de)EGEEIEVNCTAMASKPATTIR  | 3647.7845 | IPI00856723 | IPI00856723 | yes | no  | 3,4 | 0.0025413     | 69.47  |
| NIKRPYIVPIIWIN(de)ETGTIGDEK            | 2668.4588 | IPI00331214 | IPI00331214 | yes | yes |     | 3 4.0328E-08  | 147.53 |
| NIINDYVSN(de)QTQGMKEIIESEIDER          | 2921.4441 | IPI0013183C | IPI0013183C | yes | no  | 3,4 | 0.0015781     | 85.518 |
| NIINDYVSN(de)QTQGMK                    | 1836.904  | IPI0013183C | IPI0013183C | yes | no  | 2,3 | 0             | 263.99 |
| NIGGIETEDDYGYQGHVQTCN(de)FSAQMAK       | 3132.3553 | IPI0012676E | IPI0012676E | yes | yes |     | 3 1.7914E-13  | 136.56 |
| NIFIN(de)HSETASAK                      | 1430.7154 | IPI0040914E | IPI0040914E | yes | yes |     | 2 5.9772E-24  | 289.38 |
| NI(de)TSPVGVQPIINEHTFCAGITK            | 2495.2842 | IPI0040914E | IPI0040914E | yes | yes |     | 2 1.2345E-24  | 178.32 |
| NHNGQGYKQDPASFGNNSIIN(de)SSR           | 2832.3175 | IPI00848693 | IPI00848693 | yes | yes |     | 3 1.0136E-11  | 138.82 |
| NHAVSFDPISAVKN(de)FSEAASDFHR           | 2792.3307 | IPI00113042 | IPI00113042 | yes | no  |     | 3 6.1592E-09  | 124.08 |
| NGTAHGN(de)STHPMHSR                    | 1602.707  | IPI00128484 | IPI00128484 | yes | yes |     | 2 0.030639    | 71.354 |
| NGNATI(de)IR                           | 857.47191 | IPI0098582E | IPI0098582E | no  | no  |     | 2 0.010982    | 137.14 |
| NGNATI(de)IR                           | 857.47191 | IPI0098582E | IPI0098582E | no  | no  |     | 2 0.010982    | 137.14 |
| NGNA(de)TIIR                           | 857.47191 | IPI0098582E | IPI0098582E | no  | no  |     | 2 0.010982    | 137.14 |
| NGNA(de)TIIR                           | 857.47191 | IPI0098582E | IPI0098582E | no  | no  |     | 2 0.010982    | 137.14 |

|                                              |           |             |             |     |     |       |   |             |        |
|----------------------------------------------|-----------|-------------|-------------|-----|-----|-------|---|-------------|--------|
| NGIASGSGN(de)CSTGPNGDGSFHAWSIIEVK            | 2918.3253 | IPI00322497 | IPI00322497 | yes | yes |       | 3 | 3.9877E-15  | 154.7  |
| NGHITN(de)YTVVYR                             | 1435.7208 | IPI00110264 | IPI00110264 | yes | yes |       | 2 | 1.3795E-74  | 195.77 |
| NGDAYGYN(de)DSIK                             | 1478.6314 | IPI00471081 | IPI00471081 | yes | yes |       | 2 | 0.0073169   | 104.55 |
| NFN(de)DSIHSISQAIR                           | 1600.7958 | IPI00263041 | IPI00263041 | yes | yes |       | 2 | 0.0036613   | 106.42 |
| NF(de)TAADWGHRS                              | 1260.5636 | IPI0033988E | IPI0033988E | yes | no  |       | 2 | 2.3463E-07  | 167.71 |
| NF(de)NVEKINGEWHTIIASDKR                     | 2483.2921 | IPI0096896E | IPI0100832E | no  | no  |       | 3 | 7.5417E-51  | 209.23 |
| NEDRPIAPCGAIANSFMNDTIEIYIVAN(de)ESDPKPIPIPIK | 4422.224  | IPI0038731E | IPI0038731E | yes | no  |       | 4 | 5.6416E-17  | 104.9  |
| NEDRPIAPCGAIANSFMN(de)DTIEIYIVANESDPKPIPIPIK | 4422.224  | IPI0038731E | IPI0038731E | yes | no  |       | 4 | 5.6416E-17  | 104.9  |
| NAVNCTYKNED(de)DCVVR                         | 1955.8466 | IPI00266264 | IPI00266264 | yes | yes |       | 2 | 1.2295E-11  | 171.46 |
| NATIAEQAKI(de)PATEKPVIIISK                   | 2221.2682 | IPI0012334E | IPI0012334E | yes | yes |       | 2 | 3.2792E-05  | 136.46 |
| NAKGDEKEN(de)ITAEADISIK                      | 2158.1117 | IPI0012472E | IPI0012472E | yes | no  | 2,3   |   | 9.9907E-50  | 208.98 |
| NAIQAFGN(de)GTDVNMSPK                        | 1762.8308 | IPI0011635E | IPI0011635E | yes | no  |       | 2 | 0.0008695   | 139.08 |
| NAINITFHAQN(de)IGEGGAYEAEIR                  | 2487.2142 | IPI0011597E | IPI0011597E | yes | yes | 2,3   |   | 7.1084E-16  | 260.53 |
| N(de)YTDCTSEGR                               | 1201.467  | IPI0011353E | IPI0011353E | yes | no  |       | 2 | 0.012817    | 110.84 |
| N(de)YTANATSSREEAWDYVQAQVK                   | 2530.1724 | IPI0010809E | IPI0010809E | yes | no  | 2,3   |   | 5.2182E-38  | 155.94 |
| N(de)YSIFIADINQER                            | 1581.7787 | IPI0033131E | IPI0033131E | yes | no  |       | 2 | 3.5051E-14  | 259.68 |
| N(de)VTYGTYIDDPDPDDGFNYK                     | 2307.9808 | IPI0039995E | IPI0039995E | yes | no  |       | 2 | 1.8101E-11  | 243.97 |
| N(de)VTIECPFKR                               | 1262.6441 | IPI0031005E | IPI0031005E | yes | no  |       | 2 | 0.0025219   | 142.43 |
| N(de)VSCIWCNENK                              | 1422.602  | IPI0037764E | IPI0037764E | yes | no  |       | 2 | 0.0056913   | 110.8  |
| N(de)TTSYPPMCSQDAVGGQVISEIFTNRK              | 2999.4117 | IPI0038728E | IPI0038728E | yes | yes |       | 3 | 0.0075054   | 59.429 |
| N(de)TTSYPPMCSQDAVGGQVISEIFTNR               | 2871.3167 | IPI0038728E | IPI0038728E | yes | yes |       | 3 | 0.0017403   | 70.316 |
| N(de)TTSAAAMVHCIR                            | 1359.6387 | IPI0013121E | IPI0013121E | yes | yes |       | 2 | 0.022139    | 85.845 |
| N(de)TTPDEISAVITAVIQDVR                      | 2154.1532 | IPI0012183E | IPI0012183E | yes | no  |       | 3 | 1.9378E-47  | 166.52 |
| N(de)TTCQDIQIEVK                             | 1447.6977 | IPI00131091 | IPI00131091 | yes | no  |       | 2 | 0.0014169   | 139.46 |
| N(de)STKEEIIAAIEK                            | 1444.7773 | IPI0092832E | IPI0092832E | yes | no  |       | 2 | 9.0222E-13  | 171.26 |
| N(de)STIQAANIAGIK                            | 1299.7147 | IPI00222937 | IPI00222937 | yes | no  |       | 2 | 4.8254E-45  | 210.38 |
| N(de)RTDVEYEIDEK                             | 1509.6947 | IPI0013474E | IPI0013474E | yes | yes |       | 2 | 0.0051648   | 124.42 |
| N(de)QTIEIHVIYGPR                            | 1538.8205 | IPI0012297E | IPI0012297E | yes | no  |       | 2 | 1.4301E-44  | 208.27 |
| N(de)QSVGDPNVDIIR                            | 1425.7212 | IPI0012744E | IPI0012744E | yes | yes |       | 2 | 3.6498E-70  | 221.86 |
| N(de)MTIFSDIVAOK                             | 1366.6803 | IPI00621027 | IPI00621027 | yes | no  |       | 1 | 0.017961    | 108.47 |
| N(de)ITVIEPVTQPFIQVTNTTVK                    | 2341.2893 | IPI0010853E | IPI0010853E | yes | no  | 2,3   |   | 1.1593E-06  | 153.36 |
| N(de)ITMFISR                                 | 980.51134 | IPI0022571E | IPI0022571E | yes | yes |       | 2 | 0.020632    | 129.38 |
| N(de)ITFQGPPIK                               | 1113.6182 | IPI00111794 | IPI00111794 | yes | no  |       | 2 | 0.0019991   | 139.43 |
| N(de)ISVVVATHSPTIAK                          | 1535.8671 | IPI0022141E | IPI0022141E | yes | no  |       | 2 | 0.0005383   | 127.57 |
| N(de)ISTCFSSGDIFAAHNISER                     | 2225.0171 | IPI0012342E | IPI0012342E | yes | no  |       | 2 | 1.0825E-05  | 127.58 |
| N(de)ISGVVIADHSGSFHNR                        | 1808.8918 | IPI00118674 | IPI00118674 | yes | yes | 2,3   |   | 0.0009579   | 113.33 |
| N(de)HSIPIETK                                | 1037.5506 | IPI00129041 | IPI00129041 | yes | no  |       | 2 | 0.025728    | 101.38 |
| N(de)GTAHGNSTHPMHSR                          | 1602.707  | IPI00128484 | IPI00128484 | yes | yes |       | 2 | 0.030639    | 71.354 |
| N(de)FSGYYIGVGR                              | 1231.5986 | IPI00458077 | IPI00458077 | yes | yes |       | 2 | 0.0060906   | 109.24 |
| N(de)ETHSICSACDESCK                          | 1796.6764 | IPI0011128E | IPI0011128E | yes | yes |       | 2 | 0.0042083   | 98.582 |
| N(de)CSTQHFPR                                | 1145.5036 | IPI00322304 | IPI00322304 | yes | yes |       | 2 | 0.029084    | 98.044 |
| N(de)ATYGHYEPGEEFHDVEDAETYKK                 | 2828.2202 | IPI0022179E | IPI0022179E | yes | no  |       | 3 | 9.9445E-09  | 147.35 |
| N(de)ATVVVWMKDNIR                            | 1445.7449 | IPI0012137E | IPI0012137E | yes | no  |       | 2 | 0.0159      | 109.44 |
| N(de)ATVVVWMK                                | 947.48987 | IPI0012137E | IPI0012137E | yes | no  |       | 2 | 0.0056545   | 147.19 |
| N(de)ATYPPMCSQDAAR                           | 1681.7188 | IPI0012839E | IPI0012839E | yes | yes |       | 2 | 0.0008967   | 141.34 |
| N(de)ATSYPPMCSQDAGWAK                        | 1882.7978 | IPI0013834E | IPI0013834E | yes | yes |       | 2 | 0.0003233   | 141.86 |
| N(de)ATSYPPMCFQDPVTGQIVNDIITNRK              | 3078.4903 | IPI0013121E | IPI0013121E | yes | yes |       | 3 | 0.0066506   | 61.616 |
| N(de)ATIVNEADKIR                             | 1342.7205 | IPI0031950E | IPI0031950E | yes | no  |       | 2 | 0.0050047   | 133.15 |
| N(de)ASSEYSGTYSCTVQNR                        | 1922.8065 | IPI0027037E | IPI0027037E | yes | no  |       | 2 | 0.013173    | 80.545 |
| MYVTN(de)DTEVAENNYEAIKDFFR                   | 2668.2115 | IPI0065853E | IPI0065853E | yes | no  | 2,3   |   | 1.7084E-09  | 160.67 |
| MYVTN(de)DTEVAENNYEAIK                       | 2102.9467 | IPI0065853E | IPI0065853E | yes | no  |       | 2 | 0.002322    | 100.45 |
| MYSEGSDIVPQSN(de)ETAIHYFKK                   | 2543.2002 | IPI0013114E | IPI0013114E | yes | no  | 2,3   |   | 4.4657E-10  | 163.41 |
| MYSEGSDIVPQSN(de)ETAIHYFK                    | 2415.1053 | IPI0013114E | IPI0013114E | yes | no  | 2,3   |   | 4.9294E-06  | 149.95 |
| MVN(de)TTFICTATNAVGTGR                       | 1912.9135 | IPI0010937E | IPI0010937E | yes | no  | 2,3   |   | 1.366E-204  | 278.07 |
| MVN(de)HSIHPTEPVK                            | 1487.7555 | IPI00750217 | IPI00750217 | yes | no  |       | 2 | 0.0026341   | 136.3  |
| MTISQN(de)NSIIR                              | 1275.6605 | IPI0010853E | IPI0010853E | no  | no  |       | 2 | 1.9515E-19E | 227.37 |
| MSVINFEKN(de)K                               | 1240.558  | IPI00308971 | IPI00308971 | yes | yes |       | 2 | 0.029398    | 91.937 |
| MSTIIHHPQYAWIQDIGIREGNEGVYN(de)GSWGGR        | 3911.8802 | IPI00230084 | IPI00230084 | yes | no  |       | 4 | 1.4956E-25  | 121.02 |
| MSQHPIDIQEDFNATIVN(de)ASSIIPK                | 2881.428  | IPI0076281E | IPI0076281E | yes | yes |       | 3 | 0.0045299   | 61.437 |
| MSPWSN(de)WSECDPCIK                          | 1895.7641 | IPI0023071E | IPI0023071E | yes | no  |       | 2 | 0.0011665   | 120.92 |
| MRSPGAQD(de)NVSVSQGMR                        | 1818.8465 | IPI0034858E | IPI0034858E | yes | no  |       | 3 | 7.2362E-18  | 177.58 |
| MQVVSN(de)GTVTTAIWR                          | 1661.8559 | IPI0033117E | IPI0033117E | yes | no  |       | 2 | 0.002987    | 109.07 |
| MQDTIEHHVNVSDTSAIPSTIEYGN(de)R               | 2913.3563 | IPI0012095E | IPI0012095E | yes | yes |       | 3 | 1.177E-13   | 124.4  |
| MQDTIEHHVN(de)VSOTSAIPSTIEYGNR               | 2913.3563 | IPI0012095E | IPI0012095E | yes | yes |       | 3 | 1.177E-13   | 124.4  |
| MPSQASAGNVYPQPIIN(de)SSMCIEDSR               | 2851.2939 | IPI0022475E | IPI0022475E | yes | yes |       | 3 | 0.0003784   | 80.102 |
| MPFPIDQDFYVSPFTQDIIN(de)R                    | 2542.2202 | IPI0031817E | IPI0031817E | yes | yes |       | 3 | 0.0001637   | 102.69 |
| MNPDIDTGHN(de)TSAPAHWGEIK                    | 2290.0437 | IPI0031442E | IPI0031442E | yes | no  |       | 3 | 0.0026798   | 79.97  |
| MN(de)MSVITIQEYEFEK                          | 1860.8638 | IPI0046143E | IPI0046143E | yes | yes |       | 2 | 1.461E-12   | 172.91 |
| MIVSNIDIGPTIIDIAGYDIN(de)KTQMDGMSIPIIK       | 3801.997  | IPI0022142E | IPI0022142E | yes | yes |       | 4 | 0.0039151   | 54.003 |
| MIHN(de)TTGVYTCSAHGTWTNEVIK                  | 2775.3221 | IPI0047520E | IPI0047520E | yes | no  | 3,4   |   | 0.0008498   | 87.062 |
| MIHN(de)TTGVYTCSAHGTWTNEVIK                  | 2619.221  | IPI0047520E | IPI0047520E | yes | no  |       | 3 | 0.013091    | 64.705 |
| MIEN(de)GSISFIPTIR                           | 1576.8283 | IPI00123194 | IPI00123194 | yes | yes | 2,3   |   | 3.5123E-75  | 222.75 |
| MHING(de)SNVQVIHR                            | 1503.7729 | IPI0011906E | IPI0011906E | yes | yes | 2,3   |   | 1.1665E-07  | 160.18 |
| MGDREAIGN(de)ASQIFDSWIK                      | 2137.0262 | IPI0013458E | IPI0013458E | yes | yes | 2,3   |   | 1.2101E-07  | 163.53 |
| MFSQN(de)DTR                                 | 997.42873 | IPI0012925E | IPI0012925E | yes | yes |       | 2 | 0.018992    | 131.06 |
| MENGN(de)ISTVTVFVFTGFPQIK                    | 2328.1824 | IPI0012668E | IPI0012668E | yes | yes |       | 3 | 0.031301    | 36.253 |
| MEISVGAIQAN(de)R                             | 1287.6605 | IPI00108811 | IPI00108811 | yes | yes |       | 2 | 0.0015118   | 117.86 |
| MEAHNVSAFPN(de)FSIPPGFGHR                    | 2311.0957 | IPI0011548E | IPI0011548E | yes | no  | 2,3,4 |   | 1.1536E-39  | 197.86 |
| MEAHN(de)VSAPFNFSIPPGFGHR                    | 2311.0957 | IPI0011548E | IPI0011548E | yes | no  | 2,3,4 |   | 1.1536E-39  | 197.86 |
| MDYNSFQGTSPN(de)ETK                          | 1717.7254 | IPI00876541 | IPI00876541 | yes | no  |       | 2 | 0.0022789   | 113.65 |
| MDTSMN(de)FSR                                | 1087.4427 | IPI0013621E | IPI0013621E | yes | yes |       | 2 | 5.7379E-48  | 218.6  |
| MDGHCAPIRTEAGVFEYVADPTFEN(de)FTGGVKK         | 3542.6599 | IPI0040574E | IPI0040574E | yes | no  | 3,4   |   | 0.0018423   | 77.522 |
| MDGHCAPIRTEAGVFEYVADPTFEN(de)FTGGVK          | 3414.5649 | IPI0040574E | IPI0040574E | yes | no  |       | 3 | 4.2349E-15  | 113.64 |
| MDFIIFN(de)YSAPSYIR                          | 1835.8916 | IPI0055350E | IPI0055350E | yes | yes |       | 2 | 0.0006942   | 127.75 |
| MDEFNCFNSTFWN(de)ISIIK                       | 2003.9121 | IPI0042041E | IPI0042041E | yes | yes |       | 2 | 1.4902E-60  | 214.22 |
| MDEFNCFN(de)STFWNISIIK                       | 2003.9121 | IPI0042041E | IPI0042041E | yes | yes |       | 2 | 1.4902E-60  | 214.22 |

|                                                 |           |             |             |     |     |     |   |            |        |
|-------------------------------------------------|-----------|-------------|-------------|-----|-----|-----|---|------------|--------|
| MASN(de)NTASIAQAR                               | 1333.6408 | IPI00230194 | IPI00230194 | yes | yes |     | 2 | 0.031968   | 34.386 |
| MAIIQYGSQNNQVAFPIYIN(de)VTTIHEAIER              | 3562.7879 | IPI00621027 | IPI00621027 | yes | yes |     | 4 | 2.2495E-15 | 109.68 |
| MAAAINATGRPIAFSCSWPAYEGGIPPKVN(de)YTEVSR        | 3880.9029 | IPI00315593 | IPI00315593 | yes | no  |     | 4 | 2.194E-06  | 88.986 |
| MAAAIN(de)ATGRPIAFSCSWPAYEGGIPPKVNYTEVSR        | 3880.9029 | IPI00315593 | IPI00315593 | yes | no  |     | 4 | 2.194E-06  | 88.986 |
| KYQTIN(de)CSVNVR                                | 1480.7456 | IPI00420835 | IPI00420835 | yes | no  |     | 2 | 0.0053616  | 109    |
| KYHDYYITSTSN(de)GSIEGIENR                       | 2446.1401 | IPI00130754 | IPI00130754 | yes | yes | 2,3 |   | 1.2006E-14 | 173.21 |
| KYFDQVDIS(de)NGIDWSIDHK                         | 2279.0859 | IPI00133456 | IPI00133456 | yes | yes | 2,3 |   | 1.6131E-48 | 207.43 |
| KYEQAKN(de)ISQDIEK                              | 1692.8683 | IPI01027808 | IPI01027808 | yes | no  |     | 2 | 1.5929E-35 | 196.95 |
| KWPERISAI(de)DNIIHSSIFIK                        | 2480.354  | IPI00123342 | IPI00123342 | yes | yes |     | 3 | 1.2837E-05 | 126.84 |
| KWGH(de)NVTEFQQR                                | 1528.7535 | IPI00754386 | IPI00754386 | yes | yes |     | 2 | 0.0013287  | 141.37 |
| KVVVVEQN(de)GSFQVK                              | 1559.8671 | IPI00463399 | IPI00463399 | yes | no  |     | 2 | 0.030111   | 98.105 |
| KVPSN(de)STETVIESDQFQPGVR                       | 2317.155  | IPI00119299 | IPI00119299 | yes | no  | 2,3 |   | 4.2828E-06 | 126.84 |
| KVIVAPPSEAN(de)TTK                              | 1582.8566 | IPI00875419 | IPI00875419 | no  | no  |     | 2 | 0.0018504  | 131.72 |
| KVIIN(de)NSIDEPR                                | 1396.7674 | IPI00411145 | IPI00411145 | yes | no  |     | 2 | 0.0018539  | 124.86 |
| KVEVEPIN(de)STAVHVSWK                           | 1922.0262 | IPI00110264 | IPI00110264 | yes | yes | 2,3 |   | 1.2249E-75 | 225.01 |
| KVEVEAVN(de)ATAVK                               | 1356.7613 | IPI00608063 | IPI00608063 | yes | no  |     | 2 | 4.022E-25  | 187.16 |
| KVEAEAIN(de)ATAIR                               | 1384.7674 | IPI00754853 | IPI00754853 | yes | no  |     | 2 | 0.0014818  | 120.92 |
| KVDN(de)ASIVADDMR                               | 1432.698  | IPI00356462 | IPI00356462 | yes | no  |     | 2 | 0.010163   | 102.64 |
| KVCNGIGIGEFKDTISIN(de)ATNIK                     | 2491.3105 | IPI0012119C | IPI0012119C | yes | no  |     | 3 | 2.8943E-17 | 171.47 |
| KTYAVYDIFDTAMIN(de)NSR                          | 2121.0201 | IPI0022679C | IPI0022679C | yes | no  | 2,3 |   | 7.6763E-08 | 164.53 |
| KTTIEN(de)FTCPPEYK                              | 1629.7709 | IPI0042081C | IPI0042081C | yes | yes |     | 2 | 0.0026961  | 114.7  |
| KTN(de)QSCEIVIDSTEKVNPSYIGR                     | 2637.3068 | IPI00310059 | IPI00310059 | yes | no  |     | 3 | 1.1796E-32 | 190.31 |
| KTN(de)QSCEIVIDSTEK                             | 1750.8407 | IPI00310059 | IPI00310059 | yes | no  |     | 2 | 1.3429E-35 | 196.8  |
| KTMFN(de)STEIK                                  | 1197.6064 | IPI00677395 | IPI00677395 | yes | no  |     | 2 | 0.028311   | 103.08 |
| KTGVHDGDFEYN(de)ITTTIAANK                       | 2407.202  | IPI00108849 | IPI00108849 | yes | no  | 2,3 |   | 3.048E-06  | 149.36 |
| KTGEAN(de)ITQIYTQEAIDFIQTQHAR                   | 2875.4464 | IPI0031009C | IPI0031009C | yes | no  |     | 3 | 1.3073E-84 | 222.24 |
| KSSQSN(de)QTIWFGHFTTSTIMSPSPGIR                 | 2994.4658 | IPI00226714 | IPI00226714 | yes | no  |     | 3 | 0.0017344  | 74.748 |
| KSPGYVIDIIVTPQN(de)K                            | 1770.988  | IPI00109946 | IPI00109946 | yes | yes | 2,3 |   | 0.0016573  | 137.44 |
| KSEEMINIVN(de)NSKDFVENVTSGNAVDFFPVIR            | 3611.793  | IPI00128287 | IPI00128287 | yes | yes |     | 3 | 1.9892E-15 | 116.28 |
| KSDTQNIIN(de)VSTGR                              | 1694.8588 | IPI01023214 | IPI01023214 | yes | no  |     | 2 | 0.0005768  | 125.45 |
| KSCHTAVGTSEGNVPMGIIN(de)QTGSCK                  | 3081.4107 | IPI0047108C | IPI0047108C | yes | no  |     | 3 | 0.0035791  | 64.845 |
| KQVTPIFFYFQ(de)NR                               | 1686.8882 | IPI00319509 | IPI00319509 | yes | no  | 2,3 |   | 0.0012534  | 124.86 |
| KPISQEFAYVN(de)ASGEHGIVVFSIGSMVSEIPEKK          | 3805.9237 | IPI00134691 | IPI00134691 | yes | no  |     | 4 | 1.1446E-09 | 98.151 |
| KPIIGHYKPDIAVVIEN(de)GTSIDR                     | 2635.4334 | IPI00410796 | IPI00410796 | yes | no  |     | 3 | 3.263E-08  | 146.89 |
| KNVNISYTV(de)NDSFFPQRPQK                        | 2381.2128 | IPI00381178 | IPI00381178 | yes | yes | 2,3 |   | 0          | 316.97 |
| KNVN(de)ISYTVNDSFFPQRPQK                        | 2381.2128 | IPI00381178 | IPI00381178 | yes | yes | 2,3 |   | 0          | 316.97 |
| KNIQAVNEIATISQC(de)NDTSSAAMVQCIR                | 3234.5795 | IPI00138342 | IPI00138342 | yes | no  |     | 3 | 0.010221   | 55.063 |
| KN(de)ITSPVGVQPIINEHTFCAGITK                    | 2623.3792 | IPI00409148 | IPI00409148 | yes | yes |     | 3 | 0.0053493  | 72.916 |
| KN(de)ISEIWDAYCYR                               | 1716.793  | IPI00987265 | IPI00987265 | yes | no  |     | 2 | 3.957E-13  | 170.56 |
| KMSN(de)ITFR                                    | 995.52224 | IPI00460063 | IPI00460063 | yes | no  |     | 2 | 0.0098274  | 143.7  |
| KMISAFN(de)ATSGK                                | 1253.6438 | IPI00466999 | IPI00466999 | yes | no  |     | 2 | 0.016333   | 97.69  |
| KKENGVFEEISN(de)SSGR                            | 1779.8751 | IPI00757771 | IPI00757771 | yes | no  | 2,3 |   | 3.7333E-11 | 214.81 |
| KITDVETQVIN(de)QTSR                             | 1730.9163 | IPI0011435C | IPI0011435C | yes | yes |     | 2 | 0.0013426  | 121.27 |
| KISTN(de)ITIVCKPGDIESAPVIR                      | 2410.3254 | IPI00308971 | IPI00308971 | yes | yes |     | 3 | 8.3826E-06 | 124.2  |
| KIPIN(de)FTEGAR                                 | 1244.6877 | IPI00129243 | IPI00129243 | yes | no  |     | 2 | 0.020314   | 93.345 |
| KINIDGSN(de)YTIK                                | 1477.814  | IPI00119063 | IPI00119063 | yes | yes |     | 2 | 6.4418E-34 | 199.13 |
| KIN(de)CSQEVPGSSQCDREPEPR                       | 2472.1122 | IPI00881836 | IPI00881836 | yes | yes |     | 3 | 4.7935E-05 | 145.91 |
| KIIASPNEEN(de)MTEIISMR                          | 2075.0391 | IPI00322575 | IPI00322575 | yes | no  | 2,3 |   | 4.2185E-08 | 164.93 |
| KIDFIVIN(de)ETR                                 | 1346.7558 | IPI00125813 | IPI00125813 | yes | no  | 2,3 |   | 2.9038E-14 | 178.15 |
| KHYQVTGYGIN(de)GTGDSNDFWR                       | 2414.104  | IPI00221669 | IPI00221669 | yes | no  |     | 3 | 0.0006841  | 115.26 |
| KGIVSGGVYNHSHVGCIPYTIPPCEHHV(de)NGSRPPCTGEGDTPF | 4558.1329 | IPI00113517 | IPI00113517 | yes | yes |     | 4 | 0.0058732  | 44.674 |
| KGCADYCN(de)QTITK                               | 1557.6916 | IPI00987265 | IPI00987265 | yes | no  |     | 2 | 0.0012733  | 124.51 |
| KFPVPFQKEN(de)VTATIVEIGR                        | 2272.258  | IPI00134691 | IPI00134691 | yes | yes | 2,3 |   | 6.5926E-28 | 188.58 |
| KFN(de)STQIAAMAPEHEEPR                          | 2054.9844 | IPI00856861 | IPI00856861 | yes | no  |     | 3 | 0.0003056  | 130.01 |
| KFHVN(de)YTQPIVAVK                              | 1642.9195 | IPI00123704 | IPI00123704 | yes | no  |     | 2 | 0.0030233  | 134.21 |
| KFEAENISN(de)YTAIISQDGK                         | 2240.1325 | IPI00464135 | IPI00464135 | yes | no  | 2,3 |   | 6.8226E-11 | 168.68 |
| KFEAEN(de)ISNYTAIISQDGK                         | 2240.1325 | IPI00464135 | IPI00464135 | yes | no  | 2,3 |   | 6.8226E-11 | 168.68 |
| KEQETCIAPEIEHGN(de)YSTTQR                       | 2490.1445 | IPI00122117 | IPI00122117 | yes | yes | 2,3 |   | 6.3316E-06 | 138.28 |
| KENGVFEEISNS(de)SGR                             | 1651.7802 | IPI00757771 | IPI00757771 | yes | no  |     | 2 | 5.1915E-47 | 207.55 |
| KENG(de)VFEEISNSSGR                             | 1651.7802 | IPI00757771 | IPI00757771 | yes | no  |     | 2 | 5.1915E-47 | 207.55 |
| KEN(de)SSYQVINWR                                | 1522.7528 | IPI00153316 | IPI00153316 | yes | yes | 2,3 |   | 6.5952E-81 | 228.78 |
| KEN(de)SSEICSNNGECVCGQCVCVR                     | 2646.0349 | IPI00132474 | IPI00132474 | yes | no  |     | 3 | 4.2464E-06 | 137.13 |
| KEDSCQIN(de)YSEGPCIGMQER                        | 2400.0144 | IPI00127352 | IPI00127352 | yes | yes | 2,3 |   | 1.7983E-20 | 182.82 |
| KDTCAQECSHFN(de)ITKVESR                         | 2309.0529 | IPI00132474 | IPI00132474 | yes | no  |     | 3 | 3.9812E-12 | 171.29 |
| KDTCAQECSHFN(de)ITK                             | 1837.8087 | IPI00132474 | IPI00132474 | yes | no  | 2,3 |   | 4.2721E-11 | 243.04 |
| KDGSQDFN(de)ETWENYEK                            | 1988.8388 | IPI00128206 | IPI00128206 | yes | yes |     | 2 | 0.0003688  | 149.52 |
| KDGAFFHHIHPFGN(de)YSFISVDATQRPQPK               | 3310.6272 | IPI00226714 | IPI00226714 | yes | no  |     | 3 | 0.0050269  | 67.899 |
| KDDEPIETTDFN(de)TTK                             | 1809.8269 | IPI00129968 | IPI00129968 | yes | yes |     | 2 | 0.0025101  | 111.06 |
| KCEVIC(de)NQSINKPITITVEQSR                      | 2503.2523 | IPI00626537 | IPI00626537 | yes | yes |     | 3 | 2.0927E-05 | 124.08 |
| KCEAN(de)ITISSPAR                               | 1445.7297 | IPI00894972 | IPI00894972 | yes | no  |     | 2 | 0.017489   | 90.444 |
| KAWGISVINPN(de)KTK                              | 1554.8882 | IPI00989096 | IPI00989096 | yes | yes | 2,3 |   | 0.0015686  | 125.73 |
| KAFITN(de)FSMIIDGVTPGVVKEK                      | 2556.3662 | IPI00312711 | IPI00312711 | yes | no  |     | 3 | 2.9459E-32 | 186.01 |
| KAFITN(de)FSMIIDGVTPGVVVK                       | 2299.2286 | IPI00312711 | IPI00312711 | yes | no  | 2,3 |   | 7.9483E-06 | 145.04 |
| K(de)IVYIEHNIKNSTK                              | 1928.0731 | IPI0092832C | IPI0092832C | yes | no  | 2,3 |   | 1.0029E-11 | 173.28 |
| IYWTGDGNISMANMDGSN(de)HTIIFSGQKGPVGIADFPEK      | 4325.0409 | IPI00119063 | IPI00119063 | yes | yes |     | 4 | 0.0006539  | 51.264 |
| IYWTGDGNISMANMDGSN(de)HTIIFSGQK                 | 3014.3539 | IPI00119063 | IPI00119063 | yes | yes | 2,3 |   | 3.1478E-14 | 125.73 |
| IYWTGDGN(de)ISMANMDGSNHTIIFSGQKGPVGIADFPEK      | 4325.0409 | IPI00119063 | IPI00119063 | yes | yes |     | 4 | 0.0006539  | 51.264 |
| IYWTGDGN(de)ISMANMDGSNHTIIFSGQK                 | 3014.3539 | IPI00119063 | IPI00119063 | yes | yes | 2,3 |   | 3.1478E-14 | 125.73 |
| IYWISSGNHTIN(de)R                               | 1559.7845 | IPI00119063 | IPI00119063 | yes | yes | 2,3 |   | 7.0216E-19 | 155.08 |
| IYWISSGN(de)HTINR                               | 1559.7845 | IPI00119063 | IPI00119063 | yes | yes | 2,3 |   | 7.0216E-19 | 155.08 |
| IYVIDGTQN(de)DTAFVFP                            | 1954.9789 | IPI00308658 | IPI00308658 | yes | no  |     | 2 | 0.0004842  | 131.72 |
| IYSDQCHHNISIPPPTEIVCN(de)R                      | 2762.3269 | IPI00123442 | IPI00123442 | yes | yes |     | 3 | 0.0023875  | 81.878 |
| IYSDQCHHN(de)ISIPPPTEIVCN                       | 2762.3269 | IPI00123442 | IPI00123442 | yes | yes |     | 3 | 0.0023875  | 81.878 |
| IYNVTHQFCN(de)ASVMDPTCVR                        | 2411.0821 | IPI0013260C | IPI0013260C | yes | no  | 2,3 |   | 1.1616E-28 | 189.9  |
| IYN(de)VTHQFCNASVMDPTCVR                        | 2411.0821 | IPI0013260C | IPI0013260C | yes | no  | 2,3 |   | 1.1616E-28 | 189.9  |
| IYIRN(de)ESEFRDK                                | 1568.7947 | IPI00115976 | IPI00115976 | yes | yes |     | 3 | 0.013929   | 110.66 |



|                                                |           |             |             |     |     |       |   |            |        |
|------------------------------------------------|-----------|-------------|-------------|-----|-----|-------|---|------------|--------|
| IYIDHNN(de)ITR                                 | 1257.6466 | IPI00120187 | IPI00120187 | yes | yes |       | 2 | 0.0023201  | 131.83 |
| IYAGMVSIMDEAVGNV(de)TK                         | 1896.9325 | IPI0065235E | IPI0065235E | yes | no  |       | 2 | 2.3805E-20 | 149.95 |
| IWIPVN(de)ITWADIEDKDGR                         | 2140.0953 | IPI0012625C | IPI0012625C | yes | no  |       | 2 | 2.5486E-07 | 161.99 |
| IVTQTIPCN(de)KTIFWSK                           | 1935.0288 | IPI0030796E | IPI0030796E | yes | yes |       | 2 | 0.032618   | 106.42 |
| IVTQTIPCN(de)K                                 | 1172.6223 | IPI0030796E | IPI0030796E | yes | yes |       | 2 | 7.9334E-19 | 190.96 |
| IVSDVQTAVKTN(de)SSFIQGFVDHVKEDCDR              | 3293.5987 | IPI0092832C | IPI0092832C | yes | no  |       | 3 | 0.004246   | 73.655 |
| IVQDVAN(de)NTNEEAGDGTATVIAR                    | 2559.2413 | IPI0030888E | IPI0030888E | yes | no  | 2,3   |   | 2.5918E-18 | 172.37 |
| IVPCEFGVIYPIAEN(de)FSR                         | 2110.0557 | IPI0012190E | IPI0012190E | yes | no  |       | 3 | 0.016122   | 75.911 |
| IVKIPSGTIVISN(de)ATEGDGGIYR                    | 2359.2747 | IPI0012915E | IPI0012915E | yes | no  |       | 3 | 6.2812E-08 | 140.63 |
| IVGSPFIGCTVVN(de)K                             | 1489.7963 | IPI0013480E | IPI0013480E | yes | no  |       | 2 | 1.8161E-08 | 162.93 |
| IVEDIESFIKPYSVVEEQKN(de)ITSCPDGAPFIQHGPDYR     | 4278.0579 | IPI0012422I | IPI0012422I | yes | yes |       | 4 | 0.0003879  | 77.522 |
| IVDVN(de)ITSEGVK                               | 1400.7875 | IPI0011352E | IPI0011352E | yes | no  |       | 2 | 0.0025652  | 143.94 |
| IVDVN(de)ITSEGK                                | 1173.6241 | IPI0011352E | IPI0011352E | yes | no  |       | 2 | 0.0017004  | 124.12 |
| IVAN(de)ISGCAAVNSETIMCCIR                      | 2338.0902 | IPI0022248E | IPI0022248E | yes | yes | 2,3   |   | 9.1833E-22 | 184.6  |
| IV(de)VPINNRENISDPTSPIR                        | 2133.1542 | IPI0013692E | IPI0013692E | yes | no  | 2,3   |   | 0.0032271  | 105.39 |
| ITYESGFIN(de)YSK                               | 1420.6874 | IPI00666034 | IPI00666034 | yes | no  |       | 2 | 0.0003681  | 143.98 |
| ITWSNAN(de)GTASYR                              | 1439.6793 | IPI0046942E | IPI0046942E | yes | no  |       | 2 | 0.0011366  | 141.34 |
| ITVVYAEN(de)GTVIQGTTVASVYK                     | 2312.2264 | IPI0031735E | IPI0031735E | yes | yes | 2,3   |   | 2.197E-16  | 177.08 |
| ITVPSSQN(de)SSFR                               | 1321.6626 | IPI0051536C | IPI0051536C | yes | no  |       | 2 | 0.011516   | 93.345 |
| ITSCATN(de)ASMCGDEAR                           | 1742.7022 | IPI0011906E | IPI0011906E | yes | yes |       | 2 | 0          | 309.88 |
| ITN(de)VTFPTGVVTNIHGDMDK                       | 2158.0729 | IPI0079846E | IPI0079846E | yes | no  | 2,3   |   | 0.0011045  | 96.234 |
| ITN(de)QTIGFSAFEQDIPVK                         | 2106.0997 | IPI0062466E | IPI0062466E | yes | yes | 2,3   |   | 0          | 321.68 |
| ITIEVDPVPKPSIEIN(de)KTEASTDSCHIR               | 3295.6758 | IPI0010994E | IPI0010994E | yes | yes |       | 3 | 2.7418E-11 | 110.83 |
| ITIAIN(de)NTITPHTIPPGTIVYK                     | 2376.3417 | IPI0030923C | IPI0030923C | yes | no  | 2,3   |   | 4.5159E-22 | 184.01 |
| ITHIPDDIPSNITVIN(de)ITHNQIR                    | 2623.4082 | IPI0032061E | IPI0032061E | yes | yes |       | 3 | 0.0001812  | 92.993 |
| ITHIPDDIPSN(de)ITVINITHNQIR                    | 2623.4082 | IPI0032061E | IPI0032061E | yes | yes |       | 3 | 0.0001812  | 92.993 |
| ITFFNSTIN(de)TSGIVAQGEAIPGHRPGIVTK             | 3405.8409 | IPI00153317 | IPI00153317 | yes | yes | 3,4   |   | 3.6028E-16 | 115.55 |
| ITFFN(de)STINTSGIVAQGEAIPGHRPGIVTK             | 3405.8409 | IPI00153317 | IPI00153317 | yes | yes | 3,4   |   | 3.6028E-16 | 115.55 |
| ITEFTHN(de)STMDYK                              | 1585.7083 | IPI0013001C | IPI0013001C | yes | no  |       | 2 | 0.001008   | 141.37 |
| ITDTICGVGNMSAN(de)ASDQER                       | 2137.9368 | IPI0011406E | IPI0011406E | yes | no  |       | 2 | 7.2709E-06 | 127.49 |
| ITDTICGVGN(de)MSANASDQER                       | 2137.9368 | IPI0011406E | IPI0011406E | yes | no  |       | 2 | 7.2709E-06 | 127.49 |
| ITDNMFCAGFKVN(de)DTK                           | 1859.8546 | IPI0011420E | IPI0011420E | yes | yes |       | 2 | 0.010723   | 104.45 |
| ITAN(de)STWQPKAK                               | 1458.7467 | IPI0065367E | IPI0065367E | yes | no  |       | 2 | 3.587E-32  | 199.13 |
| ISVPDGIKVSND(de)SSAR                           | 1528.8209 | IPI0012076I | IPI0012076I | yes | no  |       | 2 | 0.0083016  | 110.84 |
| ISTSPFAIN(de)ITMIPK                            | 1631.8957 | IPI00666034 | IPI00666034 | yes | no  |       | 2 | 6.8266E-08 | 163.8  |
| ISTNI(de)TIVCKPGDIESAPVIR                      | 2282.2304 | IPI0030897I | IPI0030897I | yes | yes |       | 2 | 9.4587E-29 | 187.43 |
| ISQN(de)ASIGPHVRPIPIQYEDKEVEPGTICDVAGWGVVTHAGR | 4552.2921 | IPI0011694E | IPI0011694E | yes | no  |       | 4 | 1.3488E-25 | 115.9  |
| ISQAIGN(de)ITVVQK                              | 1369.7929 | IPI0011203E | IPI0011203E | yes | no  |       | 2 | 0.0079124  | 96.866 |
| ISPIHAIAN(de)FSIDPK                            | 1663.9297 | IPI0011597E | IPI0011597E | yes | yes |       | 2 | 0.0031121  | 104.95 |
| ISPGGAEMFQVQDMVVSQEKGND(de)CSIQR               | 2994.3998 | IPI00130117 | IPI00130117 | yes | no  |       | 3 | 0.0002291  | 87.319 |
| ISNISN(de)ISHDIVQEATDHAYNIQQEAEISR             | 3509.6659 | IPI0022344E | IPI0022344E | yes | yes | 3,4   |   | 3.6342E-20 | 125    |
| ISN(de)VTPEDAGTYCVK                            | 1815.8349 | IPI0012915E | IPI0012915E | yes | no  |       | 2 | 1.6703E-08 | 167.69 |
| ISN(de)ITIIEMEKEKESAR                          | 1845.987  | IPI0035646E | IPI0035646E | yes | no  |       | 2 | 0.016498   | 97.235 |
| ISISEN(de)YTISIANAK                            | 1622.8516 | IPI0012137E | IPI0012137E | yes | no  |       | 2 | 0.0005461  | 146.59 |
| ISHYN(de)DTYPISPQR                             | 1786.8638 | IPI0011303E | IPI0011303E | yes | no  | 2,3   |   | 1.2203E-91 | 229.68 |
| ISHYKQN(de)FSFCR                               | 1585.746  | IPI0038130E | IPI0038130E | yes | yes | 2,3   |   | 0.026539   | 101.53 |
| ISHEN(de)GTIICSK                               | 1357.666  | IPI00338094 | IPI00338094 | yes | yes |       | 2 | 0.0026811  | 112.43 |
| ISHDGN(de)ETIPIHIYVK                           | 1834.9577 | IPI0040574E | IPI0040574E | yes | no  | 2,3   |   | 0          | 312.78 |
| ISGNSIHN(de)ASIPHEHIAYGSVITVK                  | 2506.318  | IPI0022166E | IPI0022166E | yes | no  | 2,3   |   | 5.0277E-10 | 152.47 |
| ISGN(de)ITIIR                                  | 985.59203 | IPI00137311 | IPI00137311 | yes | yes |       | 2 | 0.017366   | 115.57 |
| ISGKPTN(de)VSVMSEGDGICY                        | 2312.1028 | IPI0047388C | IPI0047388C | yes | no  |       | 2 | 2.483E-39  | 199.97 |
| ISFGSN(de)HSDFK                                | 1237.5728 | IPI0012147E | IPI0012147E | yes | no  |       | 2 | 0.019647   | 88.338 |
| ISEN(de)GSSVAGIISPMEK                          | 1918.9306 | IPI0039979E | IPI0039979E | yes | no  |       | 2 | 7.4072E-06 | 158.44 |
| ISEGNRTIINVTRN(de)DTGPPVCETR                   | 2978.488  | IPI0010853E | IPI0010853E | yes | no  |       | 4 | 9.0003E-07 | 102.48 |
| ISEGNR(de)TITIINVTRNDTGPVVCETR                 | 2978.488  | IPI0010853E | IPI0010853E | yes | no  |       | 4 | 9.0003E-07 | 102.48 |
| ISEGN(de)RTITIINVTRNDTGPVVCETR                 | 2978.488  | IPI0010853E | IPI0010853E | yes | no  |       | 4 | 9.0003E-07 | 102.48 |
| ISEEFIKN(de)ISASAR                             | 1563.8257 | IPI0089497C | IPI0089497C | yes | no  | 2,3   |   | 9.2053E-08 | 160.8  |
| ISDTN(de)ITAIPQGIPTSITEVHIDGNKITKVDAPSIK       | 3786.0415 | IPI0012319E | IPI0012319E | yes | yes | 3,4   |   | 0.001957   | 70.109 |
| ISDTN(de)ITAIPQGIPTSITEVHIDGNKITK              | 3075.6452 | IPI0012319E | IPI0012319E | yes | yes |       | 3 | 1.205E-08  | 103.03 |
| ISDTN(de)ITAIPQGIPTSITEVHIDGNK                 | 2733.4185 | IPI0012319E | IPI0012319E | yes | yes |       | 2 | 0.0001915  | 83.826 |
| ISCAFKTEN(de)QTR                               | 1453.6984 | IPI0012024E | IPI0012024E | yes | no  |       | 2 | 0.018894   | 105.95 |
| ISASGAEIEAIEAQVIN(de)ISIK                      | 2155.1736 | IPI00312711 | IPI00312711 | yes | no  | 2,3   |   | 1.3926E-18 | 267.39 |
| ISAIIDNIIN(de)HSSIFIKGAR                       | 2068.1429 | IPI0012334E | IPI0012334E | yes | yes |       | 3 | 0.0009926  | 115.5  |
| ISAIIDNIIN(de)HSSIFIK                          | 1783.9832 | IPI0012334E | IPI0012334E | yes | yes | 2,3   |   | 1.1663E-15 | 262.23 |
| IRPIFN(de)KSFESTVGQSDTYSYIFR                   | 2911.4505 | IPI00108844 | IPI00108844 | yes | yes | 3,4   |   | 4.332E-13  | 163.91 |
| IRPHFISVCDPDFSQIN(de)CSEGYIQNYR                | 3314.5237 | IPI0011562E | IPI0011562E | yes | yes | 3,4   |   | 1.1064E-38 | 191.4  |
| IRNPCTSE(de)QNCTSPFSYK                         | 2187.9677 | IPI00132474 | IPI00132474 | yes | yes | 2,3   |   | 8.0652E-12 | 170.11 |
| IRN(de)SSIGGVINKYDVVIR                         | 2002.1324 | IPI0031467E | IPI0031467E | yes | yes |       | 3 | 0.0020814  | 111.01 |
| IRDYEEN(de)SSSCHKEVQIIK                        | 2334.1274 | IPI00330594 | IPI00330594 | yes | yes |       | 3 | 0.023303   | 86.488 |
| IRDQEIEDNVHISPND(de)GSITIVGTRPSNHGAYR          | 3657.8612 | IPI0051536C | IPI0051536C | yes | yes | 3,4   |   | 0.0021588  | 73.13  |
| IRAEQITHAIGIGEAN(de)KTQIR                      | 2431.3659 | IPI0067579E | IPI0067579E | yes | no  |       | 3 | 1.1421E-05 | 135.49 |
| IQVTIYN(de)CSFGR                               | 1456.7133 | IPI0040574E | IPI0040574E | yes | no  |       | 2 | 5.6743E-06 | 153.39 |
| IQKENDNFN(de)ISKDDIDITIFHGENK                  | 2946.4359 | IPI0067425E | IPI0067425E | yes | yes |       | 3 | 8.1655E-09 | 123.6  |
| IQIEFRPIDIN(de)STAAGIPR                        | 2110.1535 | IPI0011551C | IPI0011551C | yes | yes | 2,3   |   | 0.0009243  | 145.86 |
| IQDIEITGSPVSNISAHIFSN(de)ISSIEK                | 2898.4975 | IPI0011952E | IPI0011952E | yes | yes | 2,3,4 |   | 1.035E-10  | 109.68 |
| IQDIEITGSPVSN(de)ISAHIFSNISSIEK                | 2898.4975 | IPI0011952E | IPI0011952E | yes | yes | 2,3,4 |   | 1.035E-10  | 109.68 |
| IQDFIVDNETFSGFIQHN(de)ISIPR                    | 2689.35   | IPI00112614 | IPI00112614 | yes | yes | 2,3   |   | 6.8688E-06 | 106.73 |
| IQDFIVDN(de)ETFSGFIQHNISIPR                    | 2689.35   | IPI00112614 | IPI00112614 | yes | yes | 2,3   |   | 6.8688E-06 | 106.73 |
| IQCVDGN(de)WTTIPVCIEEER                        | 2318.0671 | IPI0013001C | IPI0013001C | yes | no  |       | 2 | 5.6683E-27 | 186.15 |
| IPSSIENATSISIMN(de)ITGTAICHISDIPPDGIR          | 3492.7593 | IPI0012177E | IPI0012177E | yes | yes |       | 3 | 7.0869E-21 | 131.79 |
| IPSSIEN(de)ATSISIMNITGTAICHISDIPPDGIR          | 3492.7593 | IPI0012177E | IPI0012177E | yes | yes |       | 3 | 7.0869E-21 | 131.79 |
| IPNNTQWITW(de)SPEGHK                           | 1906.9326 | IPI0012581E | IPI0012581E | yes | no  | 2,3   |   | 3.1182E-12 | 171.78 |
| IPN(de)ISIDVIQPSFPEIIIESHMVMIR                 | 2990.5973 | IPI0022166E | IPI0022166E | yes | no  |       | 3 | 3.7575E-14 | 126.02 |
| IPFSPENTREEDFYVNETST(de)VK                     | 2601.2235 | IPI0011610E | IPI0011610E | yes | yes |       | 3 | 0.017198   | 77.899 |
| IPEN(de)QTIPGEIPEHAGPAEGVHDSR                  | 2649.2783 | IPI0085622I | IPI0085622I | yes | yes |       | 3 | 0.0001158  | 90.464 |
| INSAPVEGYSEHVGN(de)KTTIR                       | 2171.0971 | IPI0034983C | IPI0034983C | yes | no  |       | 2 | 7.7829E-05 | 119.62 |

|                                            |           |             |             |     |     |     |             |        |
|--------------------------------------------|-----------|-------------|-------------|-----|-----|-----|-------------|--------|
| INSAPVEGYSEHVGN(de)K                       | 1699.8166 | IPI0034983C | IPI0034983C | yes | no  | 2   | 0.0008457   | 142.54 |
| INNGGCQDICIITHQGHVN(de)CSCR                | 2712.1737 | IPI00119063 | IPI00119063 | yes | yes | 3   | 0.0020384   | 82.609 |
| INN(de)ITNIGPIDMK                          | 1441.7599 | IPI0033068C | IPI0033068C | yes | no  | 2   | 0.0008211   | 125.73 |
| INMTIPDAIVPTFSISN(de)HSIK                  | 2297.209  | IPI0046921E | IPI0046921E | yes | yes | 2,3 | 2.2738E-15E | 254.32 |
| INIDGSNY(de)TIK                            | 1349.7191 | IPI00119063 | IPI00119063 | yes | yes | 2   | 5.716E-11   | 173.72 |
| INETHIFN(de)GSNWIMIIYK                     | 2192.1088 | IPI00108844 | IPI00108844 | yes | yes | 2,3 | 8.1919E-08  | 160.65 |
| IN(de)YTCNQGYR                             | 1287.5666 | IPI00138061 | IPI00138061 | yes | no  | 2   | 6.6974E-37  | 205.53 |
| IN(de)YSIPTGQSMEVQIPK                      | 1903.9713 | IPI0040393E | IPI0040393E | yes | no  | 2   | 3.6852E-36  | 199.15 |
| IN(de)VTSPDIFR                             | 1160.619  | IPI00116913 | IPI00116913 | yes | yes | 2   | 0.0019593   | 139.86 |
| IN(de)VTEVYDKIKR                           | 1476.83   | IPI00225072 | IPI00225072 | yes | no  | 2   | 0.0073012   | 127.79 |
| IN(de)VTEVYDKIK                            | 1320.7289 | IPI00225072 | IPI00225072 | yes | no  | 2   | 0.0001505   | 154.15 |
| IN(de)VTEVYDK                              | 1079.5499 | IPI00225072 | IPI00225072 | yes | no  | 2   | 0.024878    | 120.06 |
| IN(de)VSYTGERPSSNMVIVDVK                   | 2207.1256 | IPI00624663 | IPI00624663 | yes | yes | 2,3 | 3.6877E-05  | 141.13 |
| IN(de)VSYTGER                              | 1037.5142 | IPI00624663 | IPI00624663 | yes | yes | 2   | 0.0045109   | 133.81 |
| IN(de)VSHAGAPIGEEYIIVFSR                   | 2171.1375 | IPI00785452 | IPI00785452 | yes | no  | 3   | 0.0004278   | 99.663 |
| IN(de)TTSDEKDPTNPFRFPNIGVEK                | 2618.2976 | IPI00131881 | IPI00131881 | yes | no  | 3   | 0.03739     | 76.176 |
| IN(de)TTSDEKDPTNPFR                        | 1733.822  | IPI00131881 | IPI00131881 | yes | no  | 2   | 0.0022526   | 123.76 |
| IN(de)SSVTDVEEIIIGVR                       | 1629.8574 | IPI00623114 | IPI00623114 | yes | no  | 2   | 0.0017414   | 135.14 |
| IN(de)QTFSGIMTMINMQFVIR                    | 2243.1265 | IPI0012001E | IPI0012001E | yes | yes | 2   | 0.014235    | 66.809 |
| IN(de)MTIPDAIVPTFSISNHSIK                  | 2297.209  | IPI0046921E | IPI0046921E | yes | yes | 2,3 | 2.2738E-15E | 254.32 |
| IN(de)KTVAIHTIDPEKIGQGGVQK                 | 2345.3067 | IPI00323624 | IPI00323624 | yes | no  | 2,3 | 1.9046E-05  | 146.13 |
| IN(de)KTVAIHTIDPEK                         | 1577.8777 | IPI00323624 | IPI00323624 | yes | no  | 2,3 | 7.3718E-26  | 186.42 |
| IN(de)ITISDVNDHTPR                         | 1593.8111 | IPI0022871E | IPI0022871E | yes | no  | 2   | 0.0065099   | 95.981 |
| IN(de)ITEEEKIINRR                          | 1626.9053 | IPI00320204 | IPI00320204 | yes | yes | 2,3 | 0.019054    | 110.08 |
| IN(de)ITEEEKIINR                           | 1470.8042 | IPI00320204 | IPI00320204 | yes | yes | 2   | 1.6709E-15  | 183.79 |
| IN(de)ISEGEVAATVK                          | 1329.714  | IPI00458003 | IPI00458003 | yes | yes | 2   | 6.02E-103   | 241.42 |
| IN(de)GTDPIVAADSKR                         | 1455.7682 | IPI00119063 | IPI00119063 | yes | yes | 2   | 1.7722E-47  | 207.4  |
| IN(de)GTDPIVAADSK                          | 1299.667  | IPI00119063 | IPI00119063 | yes | yes | 2   | 5.6642E-71  | 227.47 |
| IN(de)ETHIFNGSNWIMIIYK                     | 2192.1088 | IPI00108844 | IPI00108844 | yes | yes | 2,3 | 8.1919E-08  | 160.65 |
| IN(de)ATHFYACGTHAFQPICAAIDAETFIIPTSFEEGKEK | 4284.0296 | IPI0012466E | IPI0012466E | yes | no  | 4   | 0.0009884   | 62.958 |
| IMQDPIQQAEGIYCN(de)R                       | 1934.8979 | IPI0031454E | IPI0031454E | yes | yes | 2   | 5.041E-26   | 188.9  |
| IMNIEFYDCSCVSGSGFQKGN(de)HSAR              | 2863.2476 | IPI0023031E | IPI0023031E | yes | no  | 3   | 0.0015314   | 85.737 |
| IMNAPIYIAEWQNITKN(de)ISED                  | 2618.3163 | IPI00930882 | IPI00930882 | yes | no  | 3   | 0.031113    | 72.359 |
| IMNAPIYIAEWQN(de)ITKNISED                  | 2618.3163 | IPI00930882 | IPI00930882 | yes | no  | 3   | 0.031113    | 72.359 |
| IMNAPIYIAEWQN(de)ITK                       | 1903.9866 | IPI00930882 | IPI00930882 | yes | no  | 2   | 4.1601E-47  | 205.98 |
| IMGINN(de)VTSQSWQPQTYQICIVDPVSASVK         | 3362.6639 | IPI0055513C | IPI0055513C | yes | yes | 3   | 0.016621    | 43.895 |
| IMESHVN(de)GTFSAK                          | 1417.666  | IPI00177214 | IPI00177214 | yes | no  | 2   | 3.5369E-70  | 223.22 |
| IKVSN(de)VSCEASVSK                         | 1506.7712 | IPI0013556C | IPI0013556C | yes | no  | 2   | 0.005375    | 116.78 |
| IKPAFIKPYGTVAAN(de)SSFITDGASAMIIMSEDR      | 3601.816  | IPI00115607 | IPI00115607 | yes | no  | 3,4 | 0.0023982   | 72.728 |
| IKN(de)TTNQIAIK                            | 1355.8136 | IPI0098598E | IPI0098598E | yes | no  | 3   | 0.023251    | 103.43 |
| IKIMESH(de)PNGTFSK                         | 1658.845  | IPI00177214 | IPI00177214 | yes | no  | 2   | 0.0021662   | 124.78 |
| IKIDN(de)YSTQEIGR                          | 1535.7944 | IPI00122257 | IPI00122257 | yes | no  | 2,3 | 3.6179E-33  | 194.55 |
| IKFIEAGIYEVPIIITDSGNPPK(de)SNISIIR         | 3296.8384 | IPI00323134 | IPI00323134 | yes | no  | 3,4 | 9.451E-21   | 153.87 |
| IKEQVVGIIAQNN(de)CSCSK                     | 2176.0616 | IPI00122592 | IPI00122592 | yes | yes | 3   | 0.0009808   | 114.99 |
| IYISAEDFSIDHSPN(de)STAGPSCSIIQEAFFR        | 3580.7256 | IPI0011553C | IPI0011553C | yes | yes | 3   | 0.0020021   | 58.722 |
| IYISAEDFSIDHSPN(de)STAGPSCSIIQEAFR         | 3424.6245 | IPI0011553C | IPI0011553C | yes | yes | 3   | 0.0017638   | 59.893 |
| IY(de)EGGDIPDFRKENSYSQVINWR                | 2898.4301 | IPI0015331E | IPI0015331E | yes | yes | 3   | 0.027743    | 66.536 |
| IISYN(de)VSCSINEETQSVIEIFDPQHR             | 3077.4764 | IPI0011929E | IPI0011929E | yes | no  | 3   | 1.0337E-10  | 109.65 |
| IISVN(de)MTDKK                             | 1147.6271 | IPI00848693 | IPI00848693 | yes | yes | 2   | 0.026563    | 106.4  |
| IISQKN(de)SSQAR                            | 1230.668  | IPI00420867 | IPI00420867 | yes | no  | 2   | 0.015234    | 117.09 |
| IISQAPSTPSPNMFTINN(de)ETGDIITVAAGIDREK     | 3599.8141 | IPI00323134 | IPI00323134 | yes | no  | 3,4 | 3.8762E-10  | 99.753 |
| IQYYGN(de)FSR                              | 1259.6299 | IPI00267963 | IPI00267963 | yes | yes | 2   | 0.0023214   | 135.99 |
| IQVVYIHSNN(de)ITK                          | 1640.925  | IPI00123194 | IPI00123194 | yes | yes | 2   | 3.681E-47   | 203.11 |
| IQTAEHN(de)ISGAER                          | 1537.7849 | IPI0040393E | IPI0040393E | yes | no  | 2   | 1.8419E-47  | 205.27 |
| IQQQSN(de)QSSQFIHSVER                      | 2128.0661 | IPI00876541 | IPI00876541 | yes | no  | 2,3 | 9.8687E-37  | 199.01 |
| IIPHIEKPIQN(de)FTICFR                      | 2125.1507 | IPI00309214 | IPI00309214 | yes | yes | 2,3 | 0.00237     | 135.08 |
| IINN(de)ITSIK                              | 1014.6073 | IPI0102780E | IPI0102780E | yes | no  | 2   | 0.011792    | 121.73 |
| IINKFN(de)SSSSSIEEK                        | 1681.8523 | IPI00338561 | IPI00338561 | yes | yes | 2   | 5.4415E-18  | 182.57 |
| IINDYVSN(de)QTQGMK                         | 1722.8611 | IPI0013563E | IPI0013563E | yes | no  | 2   | 5.5395E-60  | 211.7  |
| IIN(de)TTDVYIIPSINPDGFER                   | 2276.1689 | IPI00130573 | IPI00130573 | yes | yes | 2   | 0.0095965   | 77.287 |
| IIN(de)QTIRENIK                            | 1340.7776 | IPI00460063 | IPI00460063 | yes | no  | 2   | 3.4291E-14  | 182.28 |
| IIN(de)QTIR                                | 856.51305 | IPI00460063 | IPI00460063 | yes | no  | 2   | 3.8944E-08  | 172.14 |
| IIN(de)QTADMIIQIASK                        | 1544.8232 | IPI00126864 | IPI00126864 | yes | no  | 2   | 0           | 225.09 |
| IIN(de)ITSPEATAK                           | 1256.6976 | IPI0011508E | IPI0011508E | yes | yes | 2   | 0.011286    | 93.766 |
| IIN(de)ITFIDITR                            | 1317.7656 | IPI0034356E | IPI0034356E | yes | no  | 2   | 0.0001399   | 150.49 |
| IIN(de)HSIIHK                              | 1186.7186 | IPI00406603 | IPI00406603 | yes | yes | 2   | 7.4601E-05  | 163.38 |
| IIN(de)CTNIDCIQISCAVGR                     | 2106.002  | IPI00345112 | IPI00345112 | yes | yes | 2   | 0.0003273   | 122.49 |
| IIN(de)ATHQIGCQSSISGDTGVIVHVEKEEDIK        | 3376.6933 | IPI00118674 | IPI00118674 | yes | yes | 3,4 | 2.3557E-05  | 89.723 |
| IIMNEGGHYN(de)ASSGK                        | 1576.7304 | IPI01026847 | IPI01026847 | yes | no  | 2   | 0.01215     | 87.519 |
| IISPEEN(de)VTITCTAENQUIER                  | 2429.2108 | IPI0012137E | IPI0012137E | yes | no  | 2   | 5.5721E-06  | 129.51 |
| IINN(de)FTSMDIYR                           | 1484.7697 | IPI00125182 | IPI00125182 | yes | no  | 2   | 0.0015387   | 118.87 |
| IIKAPSHN(de)TTEPDPHSISPEIQAIISEVAQHVDVQNGR | 4141.1192 | IPI00165807 | IPI00165807 | yes | no  | 4   | 0.0013749   | 62.57  |
| IIIGGIPVSGTFHN(de)FSGCISNVFVQR             | 2818.4589 | IPI00116913 | IPI00116913 | yes | no  | 3   | 2.2429E-06  | 95.48  |
| IIIGGDEDAIRPQMQUIIDFETAIAN(de)ITIPQEK      | 3623.8505 | IPI0039684C | IPI0039684C | yes | no  | 3   | 4.2211E-20  | 145.33 |
| IIFAN(de)VSVR                              | 1017.5971 | IPI0017315E | IPI0017315E | yes | no  | 2   | 0.0024698   | 144.77 |
| IIYNYN(de)STK                              | 1243.6085 | IPI0010994E | IPI0010994E | yes | no  | 2   | 0.0022734   | 136.5  |
| IIYFDSTN(de)ASEGAQPPGKPYPPYSIAK            | 2876.4232 | IPI00459432 | IPI00459432 | yes | yes | 2,3 | 4.4098E-18  | 166.21 |
| IIDIPDGYPQISCIKPEEN(de)ATIATYPEFGVIDIK     | 3932.0169 | IPI00124221 | IPI00124221 | yes | no  | 3,4 | 0.0018683   | 69.492 |
| IISPNEENM(de)TEIISMR                       | 1946.9441 | IPI0032257E | IPI0032257E | yes | no  | 2,3 | 6.8635E-06  | 158.98 |
| IASN(de)ITETMR                             | 1247.6544 | IPI0013260C | IPI0013260C | yes | no  | 2   | 2.1132E-117 | 253.76 |
| IAN(de)ISYTIQIDGHR                         | 1712.921  | IPI00894972 | IPI00894972 | yes | no  | 2   | 0.019801    | 78.285 |
| IIAENNEIISNIRDSVIN(de)ISESVEDGPR           | 3095.5735 | IPI00114044 | IPI00114044 | yes | yes | 3,4 | 4.3077E-13  | 133.47 |
| IHYIYQNNFITEIPIESFQN(de)ATGIR              | 3093.5924 | IPI00122293 | IPI00122293 | yes | yes | 3   | 6.3771E-13  | 138.09 |
| IHVAGPEN(de)DSHVAIHK                       | 1769.9424 | IPI00850413 | IPI00850413 | yes | yes | 2,3 | 0.0004659   | 147.1  |
| IHVAGGTHSVNQTVN(de)K                       | 1660.8645 | IPI0046942E | IPI0046942E | yes | no  | 2   | 0.0060005   | 95.57  |
| IHVAGGTHSVN(de)QTVNK                       | 1660.8645 | IPI0046942E | IPI0046942E | yes | no  | 2   | 0.0060005   | 95.57  |

|                                        |           |             |             |     |     |       |               |        |
|----------------------------------------|-----------|-------------|-------------|-----|-----|-------|---------------|--------|
| IHRIN(de)ASIADIQSK                     | 1564.8685 | IPI00116913 | IPI00116913 | yes | no  | 2,3   | 7.4079E-08    | 162.37 |
| IHN(de)GSEEIAQYK                       | 1458.7103 | IPI00380296 | IPI00380296 | yes | no  |       | 2 0.0015976   | 130.24 |
| IHKDN(de)TTCYEFKK                      | 1682.8086 | IPI00119063 | IPI00119063 | yes | yes |       | 2 0.0032224   | 143.42 |
| IHIIPSMNPDGYEVAQAQGN(de)MSGYIVGR       | 3056.4848 | IPI0012826C | IPI0012826C | yes | yes |       | 3 1.2597E-50  | 199.75 |
| IHIGNYN(de)GTAGDAIR                    | 1570.7852 | IPI00310797 | IPI00310797 | yes | yes |       | 2 0.0021258   | 111.64 |
| IHHWSSPKPICSIVN(de)SSIVVK              | 2387.2784 | IPI00118011 | IPI00118011 | yes | yes | 2,3   | 2.9013E-05    | 113.47 |
| IGYDPYANPPNYGNPDPIVIN(de)NTHR          | 2810.3412 | IPI0031643C | IPI0031643C | yes | no  |       | 3 1.5131E-09  | 124.4  |
| IGVTN(de)ASIVIFRPGSVR                  | 1785.0261 | IPI0065267E | IPI0065267E | yes | yes |       | 3 0.024891    | 90.759 |
| IGVQMHPGQEIHN(de)FTITGR                | 2134.0742 | IPI0011929E | IPI0011929E | yes | no  | 2,3   | 0.0002031     | 122.49 |
| IGPGEPIEHCN(de)VSGAIPPPGR              | 2242.178  | IPI0032134E | IPI0032134E | yes | no  | 2,3   | 9.4523E-06    | 119.27 |
| IGNFSEIATHN(de)QTFIK                   | 1818.9264 | IPI00855103 | IPI00855103 | yes | no  |       | 2 0.0023996   | 112.34 |
| IGN(de)WTGEWPETEIVANIWMK               | 2373.1464 | IPI00322497 | IPI00322497 | yes | yes | 2,3   | 3.9359E-95    | 231.06 |
| IGN(de)VTTWISSNPPVTFAAIYWEEDVSGHK      | 3401.6568 | IPI00225072 | IPI00225072 | yes | no  |       | 3 1.9522E-12  | 105.63 |
| IGN(de)FTIAYSAPKPETADNQR               | 2095.0334 | IPI0022919E | IPI0022919E | yes | no  | 2,3   | 0.0008746     | 109.07 |
| IGN(de)FSEIATHNQTFIK                   | 1818.9264 | IPI00855103 | IPI00855103 | yes | no  |       | 2 0.0023996   | 112.34 |
| IGISFNSITVMEN(de)GSIANVPHIREIHIDNNKIIR | 3814.0312 | IPI0012319E | IPI0012319E | yes | yes |       | 4 0.044284    | 33.487 |
| IGISFNSITVMEN(de)GSIANVPHIR            | 2468.2846 | IPI0012319E | IPI0012319E | yes | yes | 2,3   | 7.1552E-69    | 216.17 |
| IGHWIPAAPGRIEKIEGIIAN(de)VSR           | 2596.4602 | IPI0011551E | IPI0011551E | yes | no  |       | 3 0.014442    | 73.783 |
| IGHTN(de)ASIMIFEVK                     | 1558.8177 | IPI00858152 | IPI00858152 | yes | yes |       | 2 0.0010054   | 144.68 |
| IGGWN(de)ITGPWAK                       | 1298.6772 | IPI0039684C | IPI0039684C | yes | no  |       | 2 0.0026628   | 134.56 |
| IGEMWNN(de)ISDNEKQPYVTK                | 2265.0736 | IPI0022887E | IPI0022887E | yes | no  |       | 3 0.020846    | 82.663 |
| IGDVEVNAGQN(de)ATFQCIATGR              | 2220.0593 | IPI0012304C | IPI0012304C | yes | no  |       | 2 7.472E-40   | 201.27 |
| IGAINSTISN(de)ESKEAFIDWAR              | 2321.1652 | IPI00187353 | IPI00187353 | yes | yes | 2,3   | 3.5485E-05    | 117.26 |
| IGAINSTISN(de)ESK                      | 1332.6885 | IPI00187353 | IPI00187353 | yes | yes |       | 2 5.3424E-06  | 156.6  |
| IGAIN(de)STISNESKEAFIDWAR              | 2321.1652 | IPI00187353 | IPI00187353 | yes | yes | 2,3   | 3.5485E-05    | 117.26 |
| IGAIN(de)STISNESK                      | 1332.6885 | IPI00187353 | IPI00187353 | yes | yes |       | 2 5.3424E-06  | 156.6  |
| IGAIN(de)NSIIIEDR                      | 1539.8621 | IPI0011551E | IPI0011551E | yes | no  |       | 2 1.3149E-26  | 189.09 |
| IGACN(de)DTIK                          | 990.48043 | IPI00136642 | IPI00136642 | yes | yes |       | 2 1.1512E-35  | 205.83 |
| IFNIDSGN(de)GSIFTSK                    | 1598.794  | IPI00123942 | IPI00123942 | yes | yes |       | 2 0.013275    | 88.552 |
| IFIFN(de)QTGIEAKK                      | 1507.8399 | IPI00378224 | IPI00378224 | yes | yes |       | 2 0.0016137   | 127.71 |
| IFIFN(de)QTGIEAK                       | 1379.7449 | IPI00378224 | IPI00378224 | yes | yes |       | 2 1.4929E-72  | 214    |
| IESAMN(de)YTDFQRPICIPSKGDR             | 2597.2366 | IPI0041628E | IPI0041628E | yes | yes |       | 3 2.6256E-05  | 140.28 |
| IEN(de)ITTGTYYIHAQK                    | 1688.8733 | IPI0022242E | IPI0022242E | yes | yes |       | 2 0.031319    | 70.98  |
| IEN(de)ISSTESGYTATITR                  | 1841.9007 | IPI0011196C | IPI0011196C | yes | no  |       | 2 2.4044E-202 | 276.4  |
| IEKIEGIIAN(de)VSR                      | 1440.83   | IPI0011551E | IPI0011551E | yes | no  |       | 2 0.0090138   | 129.38 |
| IEIVPIIYDN(de)DSIFVQTDK                | 2221.1518 | IPI00405543 | IPI00405543 | yes | yes | 2,3   | 4.7867E-62    | 216.35 |
| IEGITN(de)ETYR                         | 1194.5881 | IPI0011929E | IPI0011929E | yes | no  |       | 2 5.8108E-27  | 196.11 |
| IEGIIAN(de)VSR                         | 1070.6084 | IPI0011551E | IPI0011551E | yes | no  |       | 2 0.0064049   | 119.74 |
| IEDRFN(de)STIGPSEEKKNWPGGPR            | 2799.3212 | IPI0011551E | IPI0011551E | yes | no  |       | 3 8.2536E-09  | 123.55 |
| IEDRFN(de)STIGPSEEK                    | 1977.928  | IPI0011551E | IPI0011551E | yes | no  | 2,3   | 0.0027942     | 140.89 |
| IEDGFHPDAVAWAN(de)ITNAIR               | 2209.0916 | IPI0016573C | IPI0016573C | yes | no  | 2,3   | 1.785E-28     | 187.47 |
| IEAYFSIEGFPAEQN(de)ASNR                | 2142.0018 | IPI0011431E | IPI0011431E | yes | yes | 2,3   | 3.03E-19      | 182.15 |
| IEAVIPAEFFEVSSSQN(de)GSYHHR            | 2829.4086 | IPI0034215E | IPI0034215E | yes | no  |       | 4 1.2439E-08  | 112.74 |
| IDWIGN(de)CSGINDDSYGYR                 | 2103.8956 | IPI0012155C | IPI0012155C | yes | yes |       | 2 5.0965E-19  | 182.76 |
| IDVSQN(de)VSSDTDQSCSTK                 | 2098.8961 | IPI0012076E | IPI0012076E | yes | no  |       | 2 2.5852E-112 | 238.8  |
| IDVNSWIEN(de)FTK                       | 1464.7249 | IPI00626793 | IPI00626793 | yes | no  |       | 2 2.7297E-22  | 190.37 |
| IDSFN(de)DSTFMIVYTPITPTTQR             | 2546.2363 | IPI0032257E | IPI0032257E | yes | no  | 2,3   | 1.5635E-06    | 127.49 |
| IDRNPSPEIPQVGN(de)ISIK                 | 2091.096  | IPI0030899C | IPI0030899C | yes | yes | 2,3   | 0.0004277     | 149.44 |
| IDPPCTN(de)TTAPSNIINPYVR               | 2406.1274 | IPI0065853E | IPI0065853E | yes | no  | 2,3   | 6.8836E-16    | 177    |
| IDNYS(de)TQEIGR                        | 1294.6153 | IPI00122257 | IPI00122257 | yes | no  |       | 2 1.2812E-07  | 166.7  |
| IDITDFEKN(de)SSFAQYQSFK                | 2267.0746 | IPI00121312 | IPI00121312 | yes | yes |       | 3 5.9505E-13  | 176.28 |
| IDIPVNTSIPNVTEIKEN(de)MTFGSTIVTNP      | 3271.701  | IPI00466371 | IPI01026704 | no  | no  |       | 3 2.8338E-13  | 111.3  |
| IDIPVNTSIPN(de)VTEIKENMTFGSTIVTNP      | 3271.701  | IPI00466371 | IPI01026704 | no  | no  |       | 3 2.8338E-13  | 111.3  |
| IDIPVNTSIPN(de)VTEIK                   | 1751.9669 | IPI00466371 | IPI01026704 | no  | no  |       | 2 5.7386E-26  | 186.77 |
| IDIPVN(de)TSIPNVTEIKENMTFGSTIVTNP      | 3271.701  | IPI00466371 | IPI01026704 | no  | no  |       | 3 2.8338E-13  | 111.3  |
| IDIPVN(de)TSIPNVTEIK                   | 1751.9669 | IPI00466371 | IPI01026704 | no  | no  |       | 2 5.7386E-26  | 186.77 |
| IDGATVDTHHIPVN(de)VTIR                 | 1957.0381 | IPI00751912 | IPI00751912 | yes | yes | 2,3   | 0.0062823     | 91.076 |
| IDFIVINE(de)TR                         | 1218.6608 | IPI00125813 | IPI00125813 | yes | no  |       | 2 0.0020625   | 138.75 |
| IDETDCIGN(de)WTWQEGSQQTIK              | 2508.1227 | IPI00122973 | IPI00122973 | yes | no  | 2,3   | 1.0154E-11E   | 239.75 |
| IDCYPDEHGASEAN(de)CSAR                 | 2050.8109 | IPI00848693 | IPI00848693 | yes | yes | 2,3   | 0.0002831     | 136.39 |
| IDC(de)RHENNTKDNSIQHEFSITR             | 2713.2627 | IPI00109727 | IPI00109727 | yes | yes |       | 3 0.01632     | 79.676 |
| IDAYNEAAVSIIN(de)SSTR                  | 1822.9061 | IPI0038029E | IPI0038029E | yes | yes |       | 2 0.0006869   | 137.69 |
| IDAPTNIQFVN(de)ETDRTVIVTWTPPR          | 2882.4927 | IPI0011353E | IPI0011353E | yes | no  | 3,4   | 1.1569E-08    | 120.71 |
| IDAPTNIQFVN(de)ETDR                    | 1731.8428 | IPI0011353E | IPI0011353E | yes | no  |       | 2 8.4463E-13C | 250.19 |
| ICQN(de)ISKK                           | 989.5328  | IPI00126184 | IPI00126184 | yes | yes |       | 2 0.042348    | 115.7  |
| ICQN(de)ISK                            | 861.43784 | IPI00126184 | IPI00126184 | yes | yes |       | 2 3.0671E-05  | 161.11 |
| ICN(de)ECSDGSFHISK                     | 1652.6923 | IPI0051536C | IPI0051536C | yes | no  |       | 2 0.0005351   | 124.16 |
| ICHTHGWN(de)ETSEIMPPGAVFSCIYR          | 2961.336  | IPI0012239E | IPI0012239E | yes | no  |       | 3 0.0004494   | 85.062 |
| ICEGDRFCIIDVMSTGSSVGN(de)ATR           | 2731.2364 | IPI0074965E | IPI0074965E | yes | no  |       | 3 1.0453E-24  | 190.88 |
| IAVTN(de)TTMTGTVIK                     | 1448.7909 | IPI00108041 | IPI00108041 | yes | yes |       | 2 1.2506E-08  | 165.49 |
| IASPPSQGEVPPGPIPEAVIAIYN(de)STR        | 2759.4494 | IPI00114457 | IPI00114457 | yes | yes |       | 3 0.0004043   | 80.83  |
| IASAVQKN(de)ATSTK                      | 1317.7252 | IPI0102780E | IPI0102780E | yes | no  |       | 2 0.007833    | 136.6  |
| IAQEGGAAAIIAN(de)NSVIIIPSSR            | 2264.2488 | IPI0012177E | IPI0012177E | yes | yes |       | 3 0.012189    | 63.225 |
| IAPASN(de)VSHTVVIRPIK                  | 1801.0574 | IPI0046718C | IPI0046718C | yes | yes |       | 2 1.1171E-25  | 186.72 |
| IAPASN(de)VSHTVVIR                     | 1462.8256 | IPI0046718C | IPI0046718C | yes | yes |       | 2 0.0020734   | 113.4  |
| IAN(de)FSQSCTIYSGDDIVEAIPKPCPGCPR      | 3251.505  | IPI0011495E | IPI0011495E | yes | no  | 3,4   | 6.7938E-24    | 172.24 |
| IAN(de)ETGGHSGPR                       | 1251.5956 | IPI0030923C | IPI0030923C | yes | no  |       | 2 0.0012787   | 117.08 |
| IAMCQNIGYN(de)VTK                      | 1510.7272 | IPI00117094 | IPI00117094 | yes | yes |       | 2 2.0179E-18  | 178.15 |
| IAITPAHIIFIADN(de)HTEPAAHFR            | 2554.3445 | IPI00230324 | IPI00230324 | yes | no  |       | 4 0.02217     | 56.424 |
| IAISFPN(de)ITSDGYPIYPTGWSSSDNVNCRPR    | 3582.7202 | IPI00466371 | IPI01026704 | no  | no  |       | 3 2.7639E-19  | 120.42 |
| IAIN(de)ITMYIK                         | 1178.6733 | IPI0013458E | IPI0013458E | yes | yes |       | 2 0.028473    | 92.611 |
| IAGGENN(de)CSGRVEIK                    | 1602.7784 | IPI0076010E | IPI0076010E | yes | no  |       | 2 0.0050861   | 132.31 |
| IAGGEN(de)NCSGRVEIK                    | 1602.7784 | IPI0076010E | IPI0076010E | yes | no  |       | 2 0.0050861   | 132.31 |
| IACIN(de)GTVIR                         | 1115.6121 | IPI0013480E | IPI0013480E | yes | no  |       | 2 8.8316E-05  | 162.38 |
| I(de)VQAQYWHDPIKESVYRNYISIFIADINQER    | 3694.8532 | IPI0033131E | IPI0033131E | yes | no  | 3,4   | 1.8468E-07    | 94.019 |
| I(de)VYIEHNIKNSTKEEIIAAIEK             | 2796.5273 | IPI0092832C | IPI0092832C | yes | no  | 2,3,4 | 2.876E-187    | 264.92 |

|                                          |           |             |             |     |     |       |               |        |
|------------------------------------------|-----------|-------------|-------------|-----|-----|-------|---------------|--------|
| I(de)AVISGCKNTTSAAMVHCIR                 | 2188.0915 | IPI00131216 | IPI00131216 | yes | yes | 2,3   | 1.9036E-13    | 171.71 |
| HYPGWVSMANAGKDTN(de)GSQFFITTVK           | 2912.3916 | IPI00135686 | IPI00135686 | yes | yes |       | 3 2.4669E-13  | 125.31 |
| HYAN(de)ITNGMYR                          | 1338.6139 | IPI00224073 | IPI00224073 | yes | no  |       | 2 0.0046693   | 114.83 |
| HVYIGDKNAIN(de)ITFHAQNIGEGGAYEAEIR       | 3299.6323 | IPI00115976 | IPI00115976 | yes | yes |       | 3 7.9991E-20  | 120.54 |
| HVVIN(de)GSSFGADGFPYVQVIK                | 2233.1532 | IPI00742377 | IPI00742377 | yes | no  |       | 3 1.0373E-05  | 118.24 |
| HVTDMN(de)STIHIIR                        | 1535.7878 | IPI00223446 | IPI00223446 | yes | yes | 2,3   | 0.0052052     | 106.26 |
| HVEDKFN(de)ETTQR                         | 1502.7114 | IPI00130654 | IPI00130654 | yes | no  |       | 2 0.0031653   | 141.58 |
| HVCPVENWSYN(de)ESCSPPAEQGGPK             | 2843.1915 | IPI00128269 | IPI00128269 | yes | yes |       | 3 1.6244E-08  | 110.4  |
| HVCPVEN(de)WSYNESCSPPAEQGGPK             | 2843.1915 | IPI00128269 | IPI00128269 | yes | yes |       | 3 1.6244E-08  | 110.4  |
| HTDDITSIN(de)NTIVNIR                     | 1824.933  | IPI00129304 | IPI00129304 | yes | yes | 2,3   | 3.4505E-08    | 166.48 |
| HSVPVFCHPSFYN(de)DTDFIGEEIDIVDK          | 3278.523  | IPI00416285 | IPI00416285 | yes | yes |       | 3 0.003711    | 59.55  |
| HSVIWNAMIHQIN(de)MTIK                    | 2132.1023 | IPI00111794 | IPI00111794 | yes | no  | 2,3   | 0.0003847     | 115.31 |
| HSQQPIITYEKYN(de)VTDTPK                  | 2261.1328 | IPI00322418 | IPI00322418 | yes | yes |       | 2 1.2912E-07  | 161.95 |
| HSIEHFNN(de)NTDHSHTIR                    | 2318.0941 | IPI00114958 | IPI00114958 | yes | no  | 2,3,4 | 1.055E-49     | 211.06 |
| HPGNFSSISCDYFAVN(de)QSR                  | 2184.9647 | IPI00115976 | IPI00115976 | yes | yes | 2,3   | 1.737E-12     | 169.49 |
| HPGN(de)FSSISCDYFAVNQSR                  | 2184.9647 | IPI00115976 | IPI00115976 | yes | yes | 2,3   | 1.737E-12     | 169.49 |
| HNN(de)DTQHIWESDSNEFSVIADPR              | 2710.2008 | IPI00129526 | IPI00129526 | yes | no  | 2,3,4 | 7.5675E-102   | 235.68 |
| HN(de)QSCEWCQTIAVR                       | 1787.7832 | IPI00330843 | IPI00330843 | yes | yes |       | 2 0.0016245   | 115.8  |
| HN(de)ITITQGK                            | 1010.5509 | IPI00128358 | IPI00128358 | yes | no  |       | 2 0.0001105   | 148.56 |
| HIVFWN(de)SSNPK                          | 1327.6673 | IPI00130752 | IPI00130752 | yes | no  |       | 2 0.0054799   | 111.63 |
| HISN(de)ATSATHEHIEGPATNDIK               | 2342.1251 | IPI00461384 | IPI00461384 | yes | yes |       | 3 0.028466    | 56.327 |
| HISFGEDYPGIVNPIDHTN(de)VTAPQASMMFQYFVK   | 3852.828  | IPI00132454 | IPI00132454 | yes | no  | 3,4   | 2.8403E-26    | 120.15 |
| HIN(de)ITTSVAGGFR                        | 1484.81   | IPI00850413 | IPI00850413 | yes | yes | 2,3   | 0.0008445     | 137.8  |
| HIN(de)ASNPSEPATIIFTAAR                  | 2009.033  | IPI00421157 | IPI00421157 | yes | yes | 2,3   | 5.3415E-133   | 250.94 |
| HIIEN(de)ATASVSEAERK                     | 1753.8959 | IPI0039684C | IPI0039684C | yes | no  | 2,3   | 1.3957E-60    | 218.12 |
| HIIEN(de)ATASVSEAER                      | 1625.8009 | IPI0039684C | IPI0039684C | yes | no  | 2,3   | 8.1305E-36    | 197.49 |
| HHAAYVNNIN(de)ATEEKYHEAIAK               | 2522.2302 | IPI00109109 | IPI00109109 | yes | yes |       | 3 1.72E-05    | 131.45 |
| HGFYCYIIGSTISTFTDAN(de)HTCTNEK           | 3036.3382 | IPI00126186 | IPI00126186 | yes | yes |       | 3 1.0552E-13  | 133.74 |
| HFKGQTQN(de)YSTIIIEASER                  | 2350.1553 | IPI00124666 | IPI00124666 | yes | no  |       | 3 0.000107    | 144.68 |
| HFFN(de)VSDEIAIVTIVK                     | 1830.988  | IPI00466371 | IPI01026704 | no  | no  |       | 2 0.0086094   | 86.367 |
| HF(de)IIDSKSNVTRPSEFNWIWIPIPIK           | 3331.7758 | IPI00319509 | IPI00319509 | yes | no  |       | 3 0.0003995   | 84.181 |
| HEN(de)NTKDNSIQHEFSITR                   | 2169.0199 | IPI00109727 | IPI00109727 | yes | yes | 2,3   | 1.2884E-47    | 205.18 |
| HEEGHMINC(de)TCFGQGR                     | 1931.7825 | IPI00113539 | IPI00113539 | yes | no  | 2,3   | 0.0011967     | 119.96 |
| HDPN(de)MTCDYVIK                         | 1491.6486 | IPI00119299 | IPI00119299 | yes | no  |       | 2 0.028819    | 81.565 |
| HAN(de)WTITPIK                           | 1179.64   | IPI00317356 | IPI00317356 | yes | yes |       | 2 0.014806    | 106.62 |
| HAN(de)ETSIGITWR                         | 1383.6895 | IPI00229935 | IPI00229935 | yes | yes |       | 2 0.013619    | 90.614 |
| HAEISFVITDGVVTGN(de)DSIEESVHSMR          | 2976.3924 | IPI00621027 | IPI00621027 | yes | yes |       | 3 2.0426E-13  | 139.69 |
| GYN(de)SSQDIPSIVIDFVK                    | 1880.952  | IPI00124666 | IPI00124666 | yes | yes |       | 2 1.3539E-47  | 206.62 |
| GYITSFEMFN(de)STFK                       | 1670.765  | IPI00262024 | IPI00262024 | yes | no  |       | 2 2.5446E-197 | 271.56 |
| GYIITINFTKN(de)TTR                       | 1640.8886 | IPI00469218 | IPI00469218 | yes | yes |       | 2 7.9684E-109 | 239.61 |
| GYIITIN(de)FTKNTR                        | 1640.8886 | IPI00469218 | IPI00469218 | yes | yes |       | 2 7.9684E-109 | 239.61 |
| GYIITIN(de)FTK                           | 1168.6492 | IPI00469218 | IPI00469218 | yes | yes |       | 2 9.2133E-28  | 201.84 |
| GWIN(de)GSIVGFYK                         | 1339.6925 | IPI00134585 | IPI00134585 | yes | no  |       | 2 1.1877E-40  | 206.36 |
| GVTSVSQIFHSPDIAIRDITYVN(de)ASQSIYGSSPR   | 3551.7645 | IPI00122977 | IPI00122977 | yes | no  |       | 3 1.6256E-05  | 83.788 |
| GVTNDIISVQGNTGPSWIN(de)KTEK              | 2457.25   | IPI00344686 | IPI00344686 | yes | yes | 2,3   | 2.0453E-10    | 159.77 |
| GVTHIN(de)ISGIKMPR                       | 1521.845  | IPI00119063 | IPI00119063 | yes | yes |       | 2 0.024878    | 100.11 |
| GVTHIN(de)ISGIK                          | 1137.6506 | IPI00119063 | IPI00119063 | yes | yes | 1,2,3 | 0.0012092     | 138.24 |
| GVSVSSGTGIPDMTGSVYN(de)K                 | 1954.9306 | IPI00457533 | IPI00457533 | yes | no  |       | 2 0.027208    | 64.275 |
| GVSSSEN(de)FTSPVMEFWERR                  | 2244.027  | IPI00466652 | IPI00466652 | yes | no  |       | 3 0.0048856   | 95.067 |
| GVSSSEN(de)FTSPVMEFWER                   | 2087.9259 | IPI00466652 | IPI00466652 | yes | no  | 2,3   | 1.253E-36     | 198.85 |
| GVQIIVFPEDGIHGFN(de)FTR                  | 2145.1007 | IPI00321375 | IPI00321375 | yes | no  | 2,3   | 2.0703E-21    | 185.85 |
| GVNVITVN(de)ATDADSK                      | 1502.7577 | IPI00623114 | IPI00623114 | yes | no  |       | 2 2.4445E-26  | 190.82 |
| GVN(de)VTMPSPQGVPPISSTQIQIDPAIQEFQIVDISR | 3860.9982 | IPI0051536C | IPI0051536C | yes | no  |       | 3 0.0003895   | 72.37  |
| GVIPGEDWTVFQSN(de)HSTYEPVIAK             | 2786.3915 | IPI00404189 | IPI00404189 | yes | no  |       | 2 0.0002406   | 87.802 |
| GVIMVGNETTYEDGHGARKN(de)ITDIVEGAK        | 3073.5139 | IPI00649186 | IPI00649186 | yes | no  |       | 3 0.0014248   | 80.835 |
| GVIMVGN(de)ETTYEDGHGARKNITDIVEGAK        | 3073.5139 | IPI00649186 | IPI00649186 | yes | no  |       | 3 0.0014248   | 80.835 |
| GVIMVGN(de)ETTYEDGHGAR                   | 1904.8687 | IPI00649186 | IPI00649186 | yes | no  | 2,3   | 0.0006603     | 117.18 |
| GVFITNE(de)TGQPIIGK                      | 1572.8512 | IPI0011196C | IPI0011196C | yes | no  |       | 2 2.8014E-75  | 224.16 |
| GVDSCHGDSGGAFQVFN(de)VTVPK               | 2445.1383 | IPI00653675 | IPI00653675 | yes | no  |       | 3 0.0090145   | 63.225 |
| GVAVTN(de)TSQIGFR                        | 1348.7099 | IPI00471089 | IPI00471089 | yes | no  |       | 2 1.0606E-09  | 166.62 |
| GTPSHEIN(de)TTSSGAIEVIK                  | 1954.9596 | IPI00849185 | IPI00849185 | yes | no  |       | 2 0.0005739   | 120.11 |
| GTFTDCAIANM(de)TQQIR                     | 1825.8451 | IPI00621027 | IPI00621027 | yes | no  |       | 2 1.7061E-106 | 199.58 |
| GTDPSPSPAATPPAPGAEISYIN(de)HTFR          | 2950.4461 | IPI00762091 | IPI00762091 | yes | yes |       | 3 2.4756E-09  | 102.21 |
| GTCEQGPSIVTPPKDIWN(de)VTGAK              | 2454.2213 | IPI00652107 | IPI00652107 | yes | no  |       | 3 0.0015375   | 89.557 |
| GTAGNAIMDGASQIVGEN(de)R                  | 1859.8796 | IPI00279079 | IPI00279079 | yes | yes | 2,3   | 5.6375E-232   | 284.5  |
| GSYIIAANGEDTDVDKITNSPQNQN(de)ITVPR       | 3358.6277 | IPI00406603 | IPI00406603 | yes | yes |       | 3 3.0726E-19  | 148.87 |
| GSTQYIENIGFN(de)MSK                      | 1687.7876 | IPI00116105 | IPI00116105 | yes | yes |       | 2 0.0013827   | 140.8  |
| GSSVIIN(de)CSAYSESPNIEWK                 | 2337.0947 | IPI00129159 | IPI00129159 | yes | no  |       | 2 3.3639E-15  | 175.65 |
| GSPGN(de)ASQGSIIHSPQIAIQADPR             | 2537.2735 | IPI00114044 | IPI00114044 | yes | yes | 2,3   | 6.4424E-09    | 116.43 |
| GSNFN(de)ISKTDNIEECQK                    | 1982.9004 | IPI00113057 | IPI00113057 | yes | yes | 2,3   | 0.0001228     | 155.57 |
| GSNFN(de)ISK                             | 865.42938 | IPI00113057 | IPI00113057 | yes | yes |       | 2 0.0038848   | 150.27 |
| GSN(de)FTAICVIK                          | 1208.6223 | IPI00120155 | IPI00120155 | yes | yes |       | 2 0.0026581   | 102.97 |
| GSIQSANDISSQTQGFQHSMDN(de)ISAQIQTVR      | 3460.6641 | IPI00330594 | IPI00330594 | yes | yes | 3,4   | 7.1253E-20    | 135.34 |
| GSIN(de)VSYNIGPGFTGSEYSR                 | 2103.9861 | IPI00113042 | IPI00113042 | yes | no  |       | 2 1.3979E-05  | 120.23 |
| GSEVEDEDIEIFN(de)TSVQIRPPSTAPGPETAALFIER | 3800.8381 | IPI00381357 | IPI00381357 | yes | no  | 3,4   | 4.882E-27     | 132.78 |
| GSAIPHPN(de)ATWEIK                       | 1606.8104 | IPI00119299 | IPI00119299 | yes | no  |       | 2 6.7403E-08  | 162.79 |
| GRADECAIPYIGATCYDIFCN(de)R               | 2781.1768 | IPI00115458 | IPI00115458 | yes | no  |       | 3 9.1688E-05  | 100.02 |
| GQTQNYST(de)IIIEASER                     | 1937.933  | IPI00124666 | IPI00124666 | yes | no  | 2,3   | 9.6957E-61    | 215.51 |
| GQTGIGFIYASGIVN(de)SSQAK                 | 2054.0433 | IPI00131143 | IPI00131143 | yes | no  |       | 2 4.3863E-51  | 205.78 |
| GPDISN(de)CTSHWVNIQAQK                   | 2053.964  | IPI00876558 | IPI00876558 | yes | no  |       | 2 0.0004878   | 112.3  |
| GPDGTEGISTVN(de)GSTDPSAVTDIR             | 2432.1303 | IPI00469426 | IPI00469426 | yes | no  | 2,3   | 3.834E-09     | 145.81 |
| GNYGWQAGN(de)HSAFWGMTIDEGIR              | 2566.1448 | IPI00115458 | IPI00115458 | yes | no  | 2,3   | 7.4794E-09    | 132.14 |
| GNYDFVEAMIVNN(de)HTSIDVER                | 2422.1223 | IPI00403586 | IPI00403586 | yes | yes | 2,3   | 6.4354E-06    | 148.01 |
| GN(de)TTAIDKEIAR                         | 1287.6783 | IPI00108535 | IPI00108535 | no  | no  |       | 2 9.0551E-07  | 160.18 |
| GN(de)QSSQWIYEAMAK                       | 1611.7351 | IPI00137792 | IPI00137792 | yes | yes |       | 2 0.0026227   | 112.96 |
| GN(de)ITEYQCHQYITK                       | 1753.8094 | IPI00122399 | IPI00122399 | yes | no  |       | 2 4.8122E-27  | 192.46 |

|                                                |           |             |             |     |     |     |   |             |        |
|------------------------------------------------|-----------|-------------|-------------|-----|-----|-----|---|-------------|--------|
| GN(de)ISTEKFVEEIK                              | 1492.7773 | IPI00466371 | IPI01026704 | no  | no  |     | 2 | 7.0714E-13  | 172.57 |
| GN(de)HSIFGIEVATIGQGDCPSVNER                   | 2653.2555 | IPI00459432 | IPI00459432 | yes | yes |     | 3 | 1.12E-09    | 125.31 |
| GN(de)GSCVCHAGWQGIR                            | 1657.7202 | IPI00987265 | IPI00987265 | yes | no  |     | 2 | 0.0010029   | 130.24 |
| GMNYN(de)SSVVK                                 | 1097.5175 | IPI00416285 | IPI00416285 | yes | yes |     | 2 | 0.015607    | 110.84 |
| GKIYWTDGDNISMANMDG(de)SNHTIIFSGQK              | 3199.4703 | IPI00119063 | IPI00119063 | yes | yes |     | 3 | 8.31E-14    | 131.27 |
| GKIYWTDG(de)DNISMANMDGSNHTIIFSGQK              | 3199.4703 | IPI00119063 | IPI00119063 | yes | yes |     | 3 | 8.31E-14    | 131.27 |
| GIWKIPFSPENTREEDFYVN(de)ETSTVK                 | 3085.5033 | IPI00116105 | IPI00116105 | yes | yes |     | 3 | 0.022183    | 60.464 |
| GIVSGGVYNSHVGCIPYTIPPCEHHVN(de)GSRPPCTGEGDTPR  | 4430.0379 | IPI00113517 | IPI00113517 | yes | yes |     | 4 | 0.0025411   | 48.774 |
| GISYQIIGN(de)HSK                               | 1315.6884 | IPI00623114 | IPI00623114 | yes | no  |     | 2 | 0.0001135   | 134.56 |
| GINIT(de)EDTYKPR                               | 1405.7201 | IPI00119809 | IPI00119809 | yes | yes |     | 2 | 8.178E-53   | 219.43 |
| GIMVGN(de)GSVIGVVQAVDAETGK                     | 2100.0885 | IPI00342158 | IPI00342158 | yes | no  | 2,3 |   | 0           | 337.87 |
| GIMIIIN(de)DTQHFSNNVKGEGQFYR                   | 2893.4545 | IPI00312711 | IPI00312711 | yes | no  |     | 3 | 0.000161    | 92.993 |
| GIMIIIN(de)DTQHFSNNVK                          | 1942.9935 | IPI00312711 | IPI00312711 | yes | no  | 2,3 |   | 1.0472E-131 | 252.82 |
| GIIN(de)ATISVAEINHPVTTYK                       | 2140.1528 | IPI00130573 | IPI00130573 | yes | yes | 2,3 |   | 1.2491E-28  | 189.55 |
| GIIGISN(de)ATYWHIPDTAYPGIYR                    | 2690.3857 | IPI00458077 | IPI00458077 | yes | yes |     | 3 | 4.6181E-10  | 153.11 |
| GIFPDGSHEISGN(de)TSITPDK                       | 2070.9858 | IPI00894972 | IPI00894972 | yes | no  |     | 2 | 0.0025636   | 87.49  |
| GIAN(de)ISNFIR                                 | 1103.6087 | IPI00129158 | IPI00129158 | no  | no  |     | 2 | 0.0020419   | 146.11 |
| GHVDPAN(de)DTFDIDPR                            | 1667.754  | IPI00453501 | IPI00453501 | yes | no  | 2,3 |   | 0.020655    | 77.527 |
| GHTDRCDEAQAIQVWN(de)DTHPEVISQKPFDK             | 3520.643  | IPI00108003 | IPI00108003 | yes | no  |     | 4 | 0.0034651   | 74.819 |
| GHIIAQVATNPQGITGTGN(de)TTSEMDPSHRK             | 3230.6102 | IPI00321375 | IPI00321375 | yes | no  |     | 3 | 1.7183E-19  | 122.34 |
| GHIIAQVATNPQGITGTGN(de)TTSEMDPSHR              | 3102.5153 | IPI00321375 | IPI00321375 | yes | no  |     | 3 | 3.69E-46    | 189.51 |
| GHICN(de)QTQNIQSSK                             | 1613.758  | IPI00987886 | IPI00987886 | yes | yes |     | 2 | 0.0003285   | 125.97 |
| GHFYYN(de)ISDVR                                | 1369.6415 | IPI00135560 | IPI00135560 | yes | no  |     | 2 | 0.0050337   | 113.38 |
| GHAIGISCQSEN(de)GTAPITYHIMK                    | 2484.189  | IPI00406901 | IPI00406901 | yes | no  |     | 3 | 1.4718E-08  | 146.78 |
| GHAHIAIVNHDSYN(de)FSHR                         | 2145.0253 | IPI00133365 | IPI00133365 | yes | no  | 2,3 |   | 2.3277E-08  | 164.2  |
| GGIN(de)ITAVTVTAENDHTVAFIGTSDGR                | 2715.3464 | IPI00405742 | IPI00405742 | yes | no  |     | 3 | 0.0012932   | 70.699 |
| GFTQIQTIIPQDVPCPGGSNAWDN(de)VTSFKDK            | 3532.7297 | IPI00471273 | IPI00471273 | yes | no  |     | 3 | 3.0888E-05  | 88.541 |
| GFQWVTGDN(de)HTSYSR                            | 1753.7808 | IPI00129423 | IPI00129423 | yes | yes |     | 2 | 5.0925E-06  | 159.18 |
| GFN(de)ATYHVR                                  | 1063.5199 | IPI00411025 | IPI00411025 | yes | yes |     | 2 | 0.014574    | 118.18 |
| GFGVAFVGN(de)YTGSIPNEAAINTVR                   | 2453.2339 | IPI00165807 | IPI00165807 | yes | no  |     | 3 | 5.5728E-05  | 95.5   |
| GFDTYFGYIIGSEDIYTHEACAPIESIN(de)GTR            | 3545.5722 | IPI00652358 | IPI00652358 | yes | no  |     | 3 | 7.7033E-22  | 156.88 |
| GENPSQYGITAFNHPIN(de)ITK                       | 2200.0913 | IPI00112614 | IPI00112614 | yes | yes |     | 2 | 3.0599E-05  | 144.17 |
| GEIQSEN(de)SSITISSNR                           | 1807.8548 | IPI00466371 | IPI01026704 | no  | no  | 2,3 |   | 3.279E-258  | 289.32 |
| GEIN(de)STIFSSRPK                              | 1434.7467 | IPI00460063 | IPI00460063 | yes | no  |     | 2 | 0.0013386   | 147.73 |
| GECYYTN(de)GTQR                                | 1347.5514 | IPI00110910 | IPI00110910 | yes | no  |     | 2 | 0.0005585   | 144.1  |
| GDTHTQIIEGIIQFN(de)ITQTSEADIHK                 | 2795.3726 | IPI00406302 | IPI00406302 | yes | no  | 3,4 |   | 1.0485E-84  | 221.14 |
| GDSGGAIVFIDN(de)ETQR                           | 1677.7958 | IPI00467068 | IPI00467068 | yes | no  |     | 2 | 0.027657    | 71.08  |
| GDPSIISVN(de)GTDFTFR                           | 1724.837  | IPI00463492 | IPI00463492 | yes | yes |     | 2 | 4.4879E-05  | 152.94 |
| GDGPFTVFPHADIIISN(de)MSQDEIAR                  | 2715.2963 | IPI00987265 | IPI00987265 | yes | no  |     | 3 | 5.9581E-09  | 117.38 |
| GDEKENITA(de)EAIDISIK                          | 1844.9367 | IPI00124725 | IPI00124725 | yes | no  | 2,3 |   | 0.0009502   | 145.52 |
| GCKDNA(de)TDSVPIR                              | 1431.6776 | IPI00119063 | IPI00119063 | yes | yes |     | 2 | 3.0438E-13  | 175.29 |
| GCADYCNQ(de)TITKR                              | 1585.6977 | IPI00987265 | IPI00987265 | yes | no  |     | 2 | 0.0010977   | 143.25 |
| GAIQIPTVSFSHEESN(de)TTAIAEFGYIRK               | 3194.5884 | IPI00224073 | IPI00224073 | yes | yes |     | 3 | 0.0004819   | 80.786 |
| GAIQIPTVSFSHEESN(de)TTAIAEFGYIR                | 3066.4934 | IPI00224073 | IPI00224073 | yes | yes |     | 3 | 4.4651E-14  | 128.29 |
| GAIDIMIQVN(de)MTPGHSSAPPK                      | 2163.0816 | IPI00224073 | IPI00224073 | yes | yes | 2,3 |   | 7.3449E-06  | 116.39 |
| GAGEVSPAESHSSKPTN(de)ISAK                      | 1965.9756 | IPI00230718 | IPI00230718 | yes | no  |     | 3 | 0.023259    | 80.738 |
| GAFVSKNPCN(de)ITREDYAPIVK                      | 2378.2053 | IPI00307966 | IPI00307966 | yes | yes | 2,3 |   | 2.2232E-05  | 149.36 |
| GAFVSKNPCN(de)ITR                              | 1462.7351 | IPI00307966 | IPI00307966 | yes | yes |     | 2 | 0.027034    | 98.592 |
| GAFISN(de)FTMTVNGMTFTSSIK                      | 2253.081  | IPI00970438 | IPI00970438 | yes | no  |     | 2 | 0.017047    | 71.756 |
| GAFFPIKEDN(de)WSIPNR                           | 1889.9424 | IPI00135560 | IPI00135560 | yes | no  |     | 2 | 0.0051928   | 115.56 |
| GAAAPSAPHWN(de)ETAEK                           | 1635.7641 | IPI00648288 | IPI00648288 | yes | no  |     | 2 | 0.0002776   | 126.16 |
| FVPNSNMN(de)FTGQAYSGR                          | 1888.8526 | IPI00108535 | IPI00108535 | no  | no  | 2,3 |   | 7.6966E-10  | 154.39 |
| FVHVN(de)TSAIHK                                | 1227.6976 | IPI00153632 | IPI00153632 | yes | yes |     | 2 | 0.0064223   | 108.35 |
| FTFTSHTPGEHQICHSN(de)STK                       | 2428.123  | IPI00473680 | IPI00473680 | yes | no  | 2,3 |   | 6.5865E-15  | 174.02 |
| FTFTSHTPGDHQICHSN(de)STR                       | 2442.1135 | IPI00153468 | IPI00153468 | yes | no  | 2,3 |   | 6.4857E-51  | 203.06 |
| FTCN(de)QTTDVIHHSK                             | 1775.8876 | IPI00319509 | IPI00319509 | yes | yes | 2,3 |   | 5.3099E-151 | 259.96 |
| FTAPDTIFAN(de)GSVYPPNEGFCPCR                   | 2716.205  | IPI01008227 | IPI01008227 | yes | no  | 2,3 |   | 7.2406E-09  | 139.28 |
| FSWNNITNSIDIANISADFQGRPVDDPTGAFAN(de)GSITFK    | 4200.0189 | IPI00459432 | IPI00459432 | yes | yes | 3,4 |   | 0.0011547   | 65.898 |
| FSWNNITNSIDIAN(de)ISADFQGRPVDDPTGAFANGSITFK    | 4200.0189 | IPI00459432 | IPI00459432 | yes | yes | 3,4 |   | 0.0011547   | 65.898 |
| FSWNN(de)ITNSIDIANISADFQGRPVDDPTGAFANGSITFK    | 4200.0189 | IPI00459432 | IPI00459432 | yes | yes | 3,4 |   | 0.0011547   | 65.898 |
| FSVN(de)QTTIITHEK                              | 1516.7886 | IPI00848693 | IPI00848693 | yes | yes |     | 2 | 2.0117E-09  | 164.64 |
| FSTEIGYN(de)GTR                                | 1243.5833 | IPI00134013 | IPI00134013 | yes | yes |     | 2 | 6.8173E-10  | 173.72 |
| FSPPVVN(de)VTWIR                               | 1413.7769 | IPI00110808 | IPI00110808 | yes | no  |     | 2 | 0.013382    | 90.861 |
| FSMSDYDIQDVIADVGIKDIFTN(de)QSDFADTTKDTPIITVIHK | 4918.411  | IPI00116105 | IPI00116105 | yes | yes |     | 4 | 0.0022952   | 46.449 |
| FSMSDYDIQDVIADVGIKDIFTN(de)QSDFADTTK           | 3699.7138 | IPI00116105 | IPI00116105 | yes | no  |     | 3 | 6.504E-38   | 180.21 |
| FSHN(de)GTCAAEGK                               | 1277.5459 | IPI00320675 | IPI00320675 | yes | yes |     | 2 | 1.1512E-07  | 162.31 |
| FSEIIVNN(de)ATEEIIVK                           | 1817.9775 | IPI00928320 | IPI00928320 | yes | no  |     | 2 | 0.0011823   | 118.21 |
| FSEIATVHN(de)HSIPK                             | 1578.8154 | IPI00124697 | IPI00124697 | yes | no  |     | 2 | 0.0022549   | 112.42 |
| FSDGIESN(de)R                                  | 1023.4621 | IPI00131091 | IPI00131091 | yes | no  |     | 2 | 0.0054052   | 132.01 |
| FSATEVPEKGAGEVSP(de)AEHSSKPTNISAK              | 2954.4621 | IPI00230718 | IPI00230718 | yes | no  | 3,4 |   | 1.1763E-13  | 135.62 |
| FQN(de)FSMATDQR                                | 1343.5928 | IPI00128178 | IPI00128178 | yes | no  |     | 2 | 1.656E-05   | 158.42 |
| FQISPQIQFSPEEVIGMVIN(de)YSR                    | 2681.3523 | IPI00123342 | IPI00123342 | yes | no  | 2,3 |   | 5.7007E-55  | 203.71 |
| FQIIN(de)FSSSEIK                               | 1411.7347 | IPI00856723 | IPI00856723 | yes | no  |     | 2 | 4.2563E-16  | 183.89 |
| FPVPFQKENV(de)TATIVEIGR                        | 2144.163  | IPI00134691 | IPI00134691 | yes | yes | 2,3 |   | 3.318E-05   | 157.57 |
| FNSTE(de)YQVVTR                                | 1342.6517 | IPI00119063 | IPI00119063 | yes | no  | 2,3 |   | 5.1371E-05  | 152.4  |
| FNGGGHIN(de)HTIFWTNISP                         | 2139.065  | IPI00109109 | IPI00109109 | yes | yes | 2,3 |   | 0.0002592   | 118.55 |
| FN(de)VSIIYGR                                  | 1067.5764 | IPI00320675 | IPI00320675 | yes | yes |     | 2 | 0.0024384   | 141.95 |
| FN(de)ITETPEADIIHQFGNIIQSISQPEDQDQINIGNAMFIEK  | 4601.202  | IPI00131830 | IPI00131830 | yes | no  | 3,5 |   | 6.8988E-05  | 56.231 |
| FN(de)GSVSFFR                                  | 1059.5138 | IPI00551169 | IPI00551169 | yes | no  |     | 2 | 0.0005422   | 159.83 |
| FN(de)ETIHR                                    | 915.45626 | IPI00471081 | IPI00471081 | yes | yes |     | 2 | 0.027465    | 123.72 |
| FN(de)DTEVIQR                                  | 1120.5513 | IPI00321375 | IPI00321375 | yes | no  |     | 2 | 0.011233    | 108.47 |
| FMGIPTKDDNIEHYKN(de)STVMAR                     | 2566.2308 | IPI00123925 | IPI00123925 | yes | no  |     | 3 | 0.0012483   | 94.057 |
| FKDNTPNAN(de)ATER                              | 1476.6957 | IPI00125138 | IPI00125138 | yes | no  |     | 2 | 0.010645    | 110.38 |
| FIWSEPQN(de)CSATK                              | 1566.7137 | IPI00118987 | IPI00118987 | yes | no  |     | 2 | 0.0011112   | 118.37 |
| FIVTQVPVHGHIFN(de)NTR                          | 2091.1378 | IPI00553703 | IPI00553703 | yes | yes |     | 3 | 0.024387    | 70.529 |
| FITDVERN(de)ETAIYHVEAFK                        | 2281.1379 | IPI00466733 | IPI00466733 | yes | no  |     | 3 | 0.0003293   | 130.29 |



|                                              |           |             |             |     |     |       |            |        |
|----------------------------------------------|-----------|-------------|-------------|-----|-----|-------|------------|--------|
| FIQSAEFFN(de)YTVR                            | 1620.7936 | IPI0012740€ | IPI0012740€ | yes | yes | 2     | 7.5949E-26 | 192.39 |
| FIQ(de)KHINASNPNSEPATIIFTAAR                 | 2525.3391 | IPI00421157 | IPI00421157 | yes | yes | 3     | 0.021711   | 71.735 |
| FINYN(de)QTVSR                               | 1240.62   | IPI0022693€ | IPI0022693€ | yes | no  | 2     | 4.7586E-62 | 224.58 |
| FIN(de)ISSTGIR                               | 1106.6084 | IPI0013189€ | IPI0013189€ | yes | yes | 2     | 0.008217   | 117.09 |
| FIEYVTSECHFYN(de)GTQHVR                      | 2386.0801 | IPI0047458€ | IPI0047458€ | yes | no  | 3     | 6.5334E-05 | 150.76 |
| FIEDKIRQFVDICSMN(de)VSFVISHR                 | 3139.5947 | IPI00309741 | IPI00309741 | yes | yes | 3     | 0.011243   | 61.616 |
| FIEAGIYEVPIITDSGNPPKSN(de)ISIIR              | 3055.6594 | IPI00323134 | IPI00323134 | yes | no  | 2,3,4 | 3.083E-11  | 115.96 |
| FHVNY(de)TQPIVAVK                            | 1514.8245 | IPI00123704 | IPI00123704 | yes | no  | 2     | 0.01654    | 86.944 |
| FHVHQPVTQPFIVTN(de)TTVK                      | 2320.2328 | IPI00658311 | IPI00658311 | yes | no  | 2,3,4 | 3.9539E-11 | 242.1  |
| FHSDINI(de)SESIIPAVIEK                       | 2011.0626 | IPI00831484 | IPI00831484 | yes | yes | 2,3   | 0.0005078  | 145.48 |
| FGYIIHTDN(de)R                               | 1234.6095 | IPI0047520€ | IPI0047520€ | yes | no  | 2     | 0.006447   | 119.68 |
| FGTCSQICN(de)NTK                             | 1428.6126 | IPI0011906€ | IPI0011906€ | yes | yes | 2     | 4.1508E-66 | 225.33 |
| FGN(de)ETFIHIDNGR                            | 1631.8056 | IPI0017035€ | IPI0017035€ | yes | yes | 2     | 0.0018109  | 118.13 |
| FGHSPIIN(de)ITGGISHASDVVIYHQHK               | 2826.4565 | IPI0011906€ | IPI0011906€ | yes | yes | 3,4,5 | 1.6582E-06 | 96.848 |
| FGEFGN(de)YSIIVQHASSGANK                     | 2125.0229 | IPI0031748€ | IPI0031748€ | yes | no  | 2,3   | 9.29E-21   | 183.06 |
| FFQAFTKN(de)GSGATIPGAGANVQTIR                | 2552.3136 | IPI00223231 | IPI00223231 | yes | no  | 3     | 0.028732   | 60.635 |
| FFN(de)FSWR                                  | 1002.4712 | IPI0039684€ | IPI0039684€ | yes | no  | 2     | 0.028311   | 130.27 |
| FFN(de)DSIVDPVDSEWFGFYR                      | 2339.0535 | IPI0033131€ | IPI0033131€ | yes | no  | 2     | 6.8032E-05 | 150.69 |
| FDGEPDQSIN(de)ITWFIK                         | 2068.9564 | IPI0062526€ | IPI0062526€ | yes | no  | 2     | 0.0048333  | 94.882 |
| FDEFFSQGCAPGYEKN(de)STICDICGPIK              | 3252.4566 | IPI0013978€ | IPI0013978€ | yes | no  | 2,3,4 | 7.0446E-30 | 178.17 |
| FDAAGTSVHGGVPQN(de)GSICAHIPMIK               | 2663.2948 | IPI0031553€ | IPI0031553€ | yes | yes | 3     | 8.0727E-15 | 156.29 |
| FCNIVPTEHCFIGN(de)GTEYR                      | 2313.0307 | IPI00227857 | IPI00227857 | yes | yes | 2,3   | 0.0008141  | 102.98 |
| FCIIDVMSTGSSSVGN(de)ATR                      | 2000.9296 | IPI0074965€ | IPI0074965€ | yes | no  | 2     | 1.1302E-93 | 231.86 |
| FAVESIVPSSISIMHSPPDAQN(de)MSEVSISPMEISTFR    | 4019.9319 | IPI00114044 | IPI00114044 | yes | yes | 3,4   | 0.0001549  | 62.833 |
| FAQPQWHIHINGTFSN(de)ETEPDTEPCVDGWVYDR        | 4057.833  | IPI0022634€ | IPI0022634€ | yes | no  | 3     | 2.315E-21  | 115.66 |
| FAQPQWHIHINGTFSN(de)ETEPDTEPCVDGWVYDR        | 4057.833  | IPI0022634€ | IPI0022634€ | yes | no  | 3     | 2.315E-21  | 115.66 |
| FAPPEAPEPWSG(de)VRDGTSQAICPQNVTMNMEGIK       | 3810.7804 | IPI00320204 | IPI00320204 | yes | yes | 4     | 0.0013373  | 58.47  |
| FAIKNEDSNFTIINNHDNTAN(de)ITVK                | 2832.4042 | IPI0013818€ | IPI0013818€ | yes | yes | 3     | 1.976E-08  | 137.72 |
| FAIKNEDSN(de)FTIINNHDNTANITVK                | 2832.4042 | IPI0013818€ | IPI0013818€ | yes | yes | 3     | 1.976E-08  | 137.72 |
| FAIKDYR(de)PSAGNNSIYQDVTVFK                  | 2745.4126 | IPI0032246€ | IPI0032246€ | yes | no  | 3     | 0.01262    | 74.776 |
| FAEIN(de)GSAICSYNIKPSEYITTSK                 | 2692.3054 | IPI00421237 | IPI00421237 | yes | no  | 3     | 0.0004542  | 91.637 |
| F(de)IFKNQTIHVIYGPR                          | 2074.1364 | IPI0012297€ | IPI0012297€ | yes | no  | 2,3,4 | 6.6779E-36 | 200.69 |
| F(de)APPQPAEPWSFVNKNTSYPPMCSQDAVGGQVISEIFTNR | 4453.1147 | IPI0038728€ | IPI0038728€ | yes | yes | 4     | 0.0067457  | 47.156 |
| EYHTIDDHCVYN(de)STHIGIQR                     | 2457.1132 | IPI0012785€ | IPI0012785€ | yes | yes | 3     | 0.0063366  | 80.638 |
| EYEGAVYPDND(de)TTDFQR                        | 1903.8224 | IPI00605187 | IPI00605187 | yes | no  | 2     | 0.0003883  | 130.27 |
| EWN(de)GTYHCIFR                              | 1481.651  | IPI00876541 | IPI00876541 | yes | no  | 2     | 0.001132   | 127.42 |
| EVNSQIDNNGCSTQEVN(de)ITEIQSKK                | 2834.3352 | IPI0012322€ | IPI0012322€ | yes | yes | 3     | 3.9464E-08 | 109.22 |
| EVNSQIDNNGCSTQEVN(de)ITEIQSK                 | 2706.2403 | IPI0012322€ | IPI0012322€ | yes | yes | 2,3   | 9.3961E-10 | 234.36 |
| EVNSKIDNNGCSTQEVN(de)ITEIQSK                 | 2706.2767 | IPI0027126€ | IPI0027126€ | yes | yes | 2     | 0.0010561  | 79.69  |
| EVN(de)KTCEAIFK                              | 1450.749  | IPI0011511€ | IPI0011511€ | yes | yes | 2     | 4.5989E-10 | 169.52 |
| EVN(de)ITVIDRK                               | 1185.6717 | IPI0011138€ | IPI0011138€ | yes | no  | 2     | 0.022222   | 105.46 |
| EVMN(de)FTAENIYK                             | 1457.6861 | IPI0017000€ | IPI0017000€ | yes | no  | 2     | 0.022516   | 85.522 |
| EVHFFVN(de)ASDVDSVK                          | 1691.8155 | IPI0031004€ | IPI0031004€ | yes | yes | 2     | 2.9037E-05 | 153.79 |
| ETYIETN(de)YTIK                              | 1373.6715 | IPI0012015€ | IPI0012015€ | yes | yes | 2     | 0.024778   | 84.507 |
| ETIVTIFDN(de)R                               | 1206.6245 | IPI0012723€ | IPI0012723€ | yes | no  | 2     | 0.0003881  | 159.09 |
| ETIEQISEFN(de)DSIK                           | 1651.7941 | IPI0017315€ | IPI0017315€ | yes | no  | 2     | 0.0047709  | 102.62 |
| ESSEHPWK(de)WTDNTEYNNTIPIRGEER               | 3187.4595 | IPI0027643€ | IPI0027643€ | yes | yes | 3     | 1.0887E-29 | 182.15 |
| ESQTIGDQCVYNSTHIGFQREN(de)GTFSK              | 3102.4101 | IPI0011813€ | IPI0011813€ | yes | yes | 3     | 2.7894E-13 | 125.45 |
| ESQTIGDQCVYN(de)STHIGFQRENGTFSK              | 3102.4101 | IPI0011813€ | IPI0011813€ | yes | yes | 3     | 2.7894E-13 | 125.45 |
| ESQTIGDQCVYN(de)STHIGFQR                     | 2339.0601 | IPI0011813€ | IPI0011813€ | yes | yes | 2     | 2.9893E-15 | 254.82 |
| ESQIN(de)ITVMAKPTNWIEGTR                     | 2287.1631 | IPI0031140€ | IPI0031140€ | yes | yes | 3     | 0.0060263  | 93.226 |
| ESNPITAQTT(de)KIDAPTNIQFVNETDR               | 3030.4894 | IPI0011353€ | IPI0011353€ | yes | no  | 3     | 3.7602E-13 | 123.64 |
| ESN(de)STSITQAAIIEK                          | 1590.8101 | IPI0011551€ | IPI0011551€ | yes | no  | 2     | 1.2454E-08 | 167.71 |
| ESIIPVTIQCND(de)ITSSSHTIMYSYWTR              | 3086.4841 | IPI00757771 | IPI00757771 | yes | no  | 3     | 0.025235   | 50.752 |
| ESGIQN(de)VSTCR                              | 1249.5721 | IPI01008227 | IPI01008227 | yes | no  | 2     | 8.2256E-07 | 164.9  |
| ERVEN(de)TSQPGEQVVTIQNIMPATVYIFK             | 3222.6053 | IPI0012915€ | IPI0012915€ | yes | no  | 3     | 1.9641E-08 | 105.32 |
| ERTEVIIQGTVSPN(de)ASAPDAVWEDYEFK             | 3150.5146 | IPI00405437 | IPI00405437 | yes | no  | 3     | 0.011368   | 69.248 |
| EREDVQAIN(de)ISVPYGPPIEDFQR                  | 2671.3242 | IPI01023131 | IPI01023131 | yes | no  | 3     | 6.3545E-08 | 144.57 |
| EQYIHEN(de)YSR                               | 1337.6    | IPI0012740€ | IPI0012740€ | yes | no  | 2     | 1.6602E-48 | 214.82 |
| EQSFQGSN(de)MTIFYR                           | 1706.7723 | IPI00453571 | IPI00453571 | yes | no  | 2     | 0.0071377  | 98.582 |
| EQNYTCHVYHEGL(de)PEPITIR                     | 2455.159  | IPI01026927 | IPI01026927 | yes | no  | 2,3   | 1.6939E-78 | 224.4  |
| EQN(de)YTCHVHHK                              | 1451.6364 | IPI00850057 | IPI00850057 | yes | no  | 2     | 0.0014005  | 120.06 |
| EQIN(de)ISIDHR                               | 1223.6258 | IPI00127407 | IPI00127407 | yes | no  | 2     | 8.3588E-77 | 230.41 |
| EQGPSIVTPPKDIWN(de)VTGAK                     | 2136.1215 | IPI0092982€ | IPI0092982€ | yes | yes | 2     | 7.4517E-05 | 113.86 |
| EQESMMN(de)ITIHIVK                           | 1671.8324 | IPI0067579€ | IPI0067579€ | yes | no  | 2     | 0.0086373  | 89.231 |
| ENYAEIIDDGFIKN(de)ITAQICIDKK                 | 2810.416  | IPI0033988€ | IPI0033988€ | yes | no  | 3     | 1.2051E-32 | 187.73 |
| ENS(de)SYQVINWR                              | 1394.6579 | IPI0015331€ | IPI0015331€ | yes | yes | 2     | 3.419E-07  | 167.2  |
| ENQN(de)HSYSIK                               | 1218.5629 | IPI0012024€ | IPI0012024€ | yes | no  | 2     | 0.015335   | 104.82 |
| ENPGFDFSGAEISGN(de)YTK                       | 1931.8537 | IPI00461281 | IPI00461281 | yes | no  | 2     | 0.010206   | 82.265 |
| ENPEQSRVT(de)INNWWVANKTEGR                   | 2441.2047 | IPI0013664€ | IPI0013664€ | yes | yes | 3     | 0.009639   | 85.51  |
| ENPEQ(de)SRVTINNWWVANKTEGR                   | 2441.2047 | IPI0013664€ | IPI0013664€ | yes | yes | 3     | 0.009639   | 85.51  |
| ENN(de)VTEIITGIFQDPNVQK                      | 2271.1747 | IPI00127461 | IPI00127461 | yes | yes | 3     | 0.017685   | 61.962 |
| ENIIDISNAN(de)R                              | 1257.6313 | IPI0096896€ | IPI0100832€ | no  | no  | 2     | 2.2841E-06 | 160.22 |
| ENIFIGQAGGFQDREEEYAEQVTEAEVATEDAN(de)STDSII  | 4945.269  | IPI00378224 | IPI00378224 | yes | yes | 4     | 1.075E-06  | 78.312 |
| ENGVD(de)AVHPGYGFISER                        | 1845.8646 | IPI00943457 | IPI00943457 | yes | no  | 2     | 0.025728   | 64.507 |
| ENGTFSKYEGGVETFAHIIIVIR(de)K                 | 2594.3493 | IPI0011813€ | IPI0011813€ | yes | yes | 3     | 0.014426   | 76.704 |
| EN(de)VSDPSITITFR                            | 1534.7627 | IPI0046921€ | IPI0046921€ | yes | yes | 2     | 2.0183E-60 | 214.47 |
| EN(de)NSPAIHIGTISATDSGSDSNAHITYSIR           | 3127.4806 | IPI00469537 | IPI00469537 | yes | yes | 3     | 0.0005953  | 67.217 |
| EN(de)ISDPTSPIR                              | 1227.6095 | IPI0013692€ | IPI0013692€ | yes | no  | 2     | 0.0016699  | 124.21 |
| EN(de)GTFSKYEGGVETFAHIIIVIR                  | 2466.2543 | IPI0011813€ | IPI0011813€ | yes | yes | 2,3   | 5.5999E-97 | 233.63 |
| EMIHN(de)ATFCIVPR                            | 1586.7698 | IPI0012553€ | IPI0012553€ | yes | no  | 2     | 0.018275   | 113.99 |
| EMGNT(de)VMDIIRNYTANATSSREEAWDYVQAQVK        | 3789.7727 | IPI0010809€ | IPI0010809€ | yes | no  | 3,4   | 0.0076039  | 57.339 |
| EKVEN(de)GSETGPIPEIQPIIEGEVK                 | 2688.3858 | IPI0013601€ | IPI0013601€ | yes | yes | 2,3   | 4.5406E-09 | 150.14 |
| EKSCVAITDAFPQN(de)MSR                        | 1952.9084 | IPI0040574€ | IPI0040574€ | yes | no  | 3     | 0.028338   | 91.657 |
| EKEDRPFHQAV(de)VNDTQAFWHNK                   | 2695.2891 | IPI00406901 | IPI00406901 | yes | no  | 3     | 1.5505E-05 | 120.11 |
| EKDVIWFRPTIINDTGN(de)YTCMIR                  | 2841.3942 | IPI0092988€ | IPI0092988€ | yes | no  | 3     | 3.7608E-09 | 151.96 |

|                                         |           |             |             |     |     |       |   |             |        |
|-----------------------------------------|-----------|-------------|-------------|-----|-----|-------|---|-------------|--------|
| EKDVIWFRPTIIN(de)DTGNYTCMIR             | 2841.3942 | IPI0092988E | IPI0092988E | yes | no  |       | 3 | 3.7608E-09  | 151.96 |
| EIVHQRN(de)TSNIFFSPVSIATAFAMISIGSK      | 3195.6274 | IPI00406302 | IPI00406302 | yes | no  |       | 3 | 1.2043E-21  | 156.7  |
| EITGIRN(de)ISSQEGSTDVVAR                | 2131.0869 | IPI0067739E | IPI0067739E | yes | no  | 2,3   |   | 2.9021E-63  | 218.14 |
| EITDTGKNAVN(de)CTYKNEDDCVVR             | 2700.2119 | IPI00266264 | IPI00266264 | yes | yes |       | 3 | 7.2603E-08  | 140.35 |
| EIN(de)ISICPVSQTSE                      | 1731.8461 | IPI0038130E | IPI0038130E | yes | yes |       | 2 | 5.3663E-11C | 240.92 |
| EIKGDGPFTVFPVPHADI(de)ISNMSQDEIAR       | 3085.5179 | IPI0098726E | IPI0098726E | yes | no  |       | 3 | 2.5863E-08  | 106.1  |
| EIIYSN(de)GSIIQMITMK                    | 1987.0159 | IPI0010853E | IPI0010853E | no  | no  | 2,3   |   | 3.3275E-15E | 258.92 |
| EIIVHPN(de)YTR                          | 1240.6564 | IPI0011375C | IPI0011375C | yes | yes |       | 2 | 0.0018788   | 148.56 |
| EIIVDEIISN(de)SSTIASYK                  | 1981.0256 | IPI00173181 | IPI00173181 | yes | no  |       | 2 | 0.0004525   | 119.76 |
| EIISN(de)ASDAIDKIR                      | 1543.8206 | IPI0012952E | IPI0012952E | no  | no  |       | 2 | 7.939E-173  | 267.93 |
| EIHIIQEQN(de)VSNVFIDKEEFFIGSK           | 2986.4825 | IPI00605187 | IPI00605187 | yes | no  | 3,4   |   | 5.0585E-32  | 181.61 |
| EIGVVMYN(de)CSCIAR                      | 1670.7579 | IPI00130624 | IPI00130624 | yes | yes |       | 2 | 0.021038    | 85.45  |
| EIGAIYN(de)CSNIAQDIEK                   | 2050.0041 | IPI0022141E | IPI0022141E | yes | no  |       | 2 | 2.3987E-261 | 295.79 |
| EIEYYVQSFANAMYN(de)ACR                  | 2284.9881 | IPI0013260C | IPI0013260C | yes | yes |       | 3 | 0.0003031   | 112.67 |
| EHSIFIDIHPVTGIPMN(de)CSVK               | 2393.1872 | IPI01008227 | IPI01008227 | yes | no  | 2,3   |   | 4.3065E-06  | 128.79 |
| EGTYSIPTSN(de)FTVPDIEIPSWISTGNYR        | 3143.5088 | IPI0011909E | IPI0011909E | yes | yes | 2,3   |   | 5.6981E-09  | 106.1  |
| EGSRTDDEVVQREEEAIQIDGIN(de)ASQIR        | 3156.5283 | IPI0012952E | IPI0012952E | yes | yes | 3,4   |   | 7.2319E-30  | 179.17 |
| EGPRNISTCFSSGDIF(de)AAHNISER            | 2664.2351 | IPI0012342E | IPI0012342E | yes | no  |       | 3 | 4.0253E-14C | 247.92 |
| EGN(de)CSAQSGIAWQDCDFKDAEEAATGECTATVGKR | 3818.6207 | IPI0011495E | IPI0011495E | yes | no  |       | 3 | 1.7229E-14  | 105.21 |
| EGN(de)CSAQSGIAWQDCDFKDAEEAATGECTATVGK  | 3662.5196 | IPI0011495E | IPI0011495E | yes | no  |       | 3 | 2.952E-38   | 173.11 |
| EGN(de)CSAQSGIAWQDCDFK                  | 2071.8364 | IPI0011495E | IPI0011495E | yes | no  |       | 2 | 2.1761E-14E | 185.33 |
| EGKFDEVYDAIAGAHPN(de)ITVYK              | 2564.2911 | IPI0011116E | IPI0011116E | yes | no  |       | 3 | 1.0059E-07  | 116.6  |
| EGKFDEVYDAIAGAHPN(de)ITVYK              | 2436.1961 | IPI0011116E | IPI0011116E | yes | no  | 2,3   |   | 1.0157E-06  | 154.42 |
| EFVNIYSYDIIN(de)K                       | 1616.8086 | IPI0100818E | IPI0100818E | yes | no  |       | 2 | 0.01626     | 79.492 |
| EFVENSECIQCHPECIPQAMN(de)ITCTGR         | 3279.3876 | IPI0012119C | IPI0012119C | yes | no  | 3,4   |   | 2.3811E-13  | 120.25 |
| EFQHN(de)STMYK                          | 1446.6238 | IPI0078844E | IPI0078844E | yes | no  |       | 2 | 0.0008005   | 143    |
| EETIYDN(de)ATSSVADRK                    | 1910.9222 | IPI00223987 | IPI00223987 | yes | yes |       | 2 | 0.022935    | 78.078 |
| EEQFN(de)STFR                           | 1156.5149 | IPI0047524E | IPI0047524E | yes | no  |       | 2 | 0.0009509   | 145.25 |
| EEN(de)ATIATYPEFGVIDIK                  | 2008.9993 | IPI00124221 | IPI00124221 | yes | no  |       | 2 | 1.2107E-48  | 209.25 |
| EEEAIQIDGIN(de)ASQIR                    | 1784.8905 | IPI0012952E | IPI0012952E | yes | yes |       | 2 | 0.0052099   | 91.657 |
| EDYN(de)STIR                            | 996.45124 | IPI0055678E | IPI0055678E | yes | no  |       | 2 | 0.024111    | 121.09 |
| EDVQAINIS(de)VPYGPPIEDFQR               | 2386.1805 | IPI01023131 | IPI01023131 | yes | no  |       | 3 | 0.034685    | 47.088 |
| EDTVTITCEGTHNPGN(de)SSTQWFHNGR          | 2944.2794 | IPI0012948E | IPI0012948E | yes | no  |       | 3 | 3.2153E-13  | 130.89 |
| EDSSRAVN(de)VSAIPANIQK                  | 1897.9858 | IPI0035430C | IPI0035430C | yes | no  |       | 2 | 0.018528    | 89.484 |
| EDSCQINY(de)SEGPCIGMQR                  | 2271.9195 | IPI0012735E | IPI0012735E | yes | yes | 2,3   |   | 2.9506E-62  | 218.14 |
| EDRPFHQAVVN(de)DTQAFWHNK                | 2438.1516 | IPI00406901 | IPI00406901 | yes | no  |       | 3 | 2.1459E-13  | 169.61 |
| EDIIA(de)IRQNFSNITVSTEDQVK              | 2519.2867 | IPI00129677 | IPI00129677 | yes | no  |       | 2 | 1.4359E-39  | 201.52 |
| ED(de)IIAIRQNFSNITVSTEDQVK              | 2519.2867 | IPI00129677 | IPI00129677 | yes | no  |       | 2 | 1.4359E-39  | 201.52 |
| ECSPPKAN(de)ITSDEI                      | 1559.7137 | IPI0046673E | IPI0046673E | yes | yes |       | 2 | 0.001625    | 125.03 |
| ECIGN(de)CSEPDDPTK                      | 1620.6396 | IPI0012835E | IPI0012835E | yes | no  |       | 2 | 9.1144E-09  | 165.86 |
| ECHTIQN(de)YTIWR                        | 1619.7515 | IPI0012522C | IPI0012522C | yes | no  | 2,3   |   | 8.1398E-21C | 280.21 |
| EAYKN(de)ISIIYSQMOK                     | 1814.9237 | IPI0022170E | IPI0022170E | yes | no  | 2,3   |   | 0.0038737   | 129.38 |
| EATIVGEN(de)ETYPR                       | 1477.7049 | IPI0013114E | IPI0013114E | yes | no  |       | 2 | 0.0012631   | 128.54 |
| EASQN(de)ITYICR                         | 1353.6347 | IPI0012112C | IPI0012112C | yes | yes |       | 2 | 0.0069216   | 107.06 |
| EASNHSSGAGIVQIN(de)KSNDKETVVGR          | 2696.3478 | IPI00108844 | IPI00108844 | yes | no  |       | 3 | 2.1082E-12  | 119.38 |
| EASNHSSGAGIVQIN(de)K                    | 1610.8012 | IPI00108844 | IPI00108844 | yes | no  |       | 2 | 1.3378E-92  | 235.88 |
| EASN(de)HSSGAGIVQINKSNDKETVVGR          | 2696.3478 | IPI00108844 | IPI00108844 | yes | no  |       | 3 | 2.1082E-12  | 119.38 |
| EASN(de)HSSGAGIVQINK                    | 1610.8012 | IPI00108844 | IPI00108844 | yes | no  |       | 2 | 1.3378E-92  | 235.88 |
| EASHYSIHDIVISYN(de)TSDSTVFPGAVAK        | 3007.4563 | IPI00222967 | IPI00222967 | yes | no  | 2,3,4 |   | 5.6769E-31  | 183.56 |
| EAQYN(de)STFR                           | 1114.5043 | IPI0080798E | IPI0080798E | yes | no  |       | 2 | 0.018705    | 114.4  |
| EAN(de)ITEDQIIFFPK                      | 1663.8457 | IPI0012212E | IPI0012212E | yes | no  |       | 2 | 5.0461E-17E | 263.56 |
| EAIGNASQI(de)FDSWIK                     | 1677.8362 | IPI0013458E | IPI0013458E | yes | yes |       | 2 | 0.0018262   | 114.01 |
| EAFN(de)ETNQAIQTISR                     | 1720.838  | IPI00112614 | IPI00112614 | yes | yes |       | 2 | 6.2011E-11C | 240.2  |
| EAFIPQGGSVQVN(de)CSSSCK                 | 2053.9197 | IPI0012297E | IPI0012297E | yes | no  |       | 2 | 0.0001072   | 139.02 |
| EACIQHYVYN(de)ASYIVWK                   | 2143.0197 | IPI0012015E | IPI0012015E | yes | yes |       | 2 | 0.0009393   | 114.29 |
| E(de)SVYRNYISIFIADINQER                 | 2216.0862 | IPI0033131E | IPI0033131E | yes | no  |       | 3 | 0.0006581   | 131.48 |
| E(de)MGNTVMDIIRNYTANATSSREEAWDYVQAQVK   | 3789.7727 | IPI0010809E | IPI0010809E | yes | no  | 3,4   |   | 0.0076039   | 57.339 |
| DYYPIN(de)ESIASIPR                      | 1749.8938 | IPI00121627 | IPI00121627 | yes | yes |       | 3 | 0.0008729   | 143.25 |
| DYYIN(de)KTENEK                         | 1415.6569 | IPI0039684C | IPI0039684C | yes | no  |       | 2 | 2.1765E-09  | 174.24 |
| DYRPSAGN(de)NSIQDQTVVFK                 | 2173.044  | IPI0032246E | IPI0032246E | yes | no  | 2,3   |   | 0.0003008   | 149.95 |
| DYCMYNNN(de)WTR                         | 1698.6555 | IPI0012177E | IPI0012177E | yes | yes |       | 2 | 1.2685E-07  | 162.93 |
| DWMPNN(de)HSVIIIIDDFESPQK               | 2384.1107 | IPI0022183E | IPI0022183E | yes | yes |       | 3 | 0.0025887   | 101.92 |
| DWIWNQMHIDEKN(de)ESIPHYVGK              | 2867.3337 | IPI0013818C | IPI0013818C | yes | yes |       | 3 | 1.3212E-07  | 115.57 |
| DWCN(de)WTIISR                          | 1349.6187 | IPI0012493E | IPI0012493E | yes | no  |       | 2 | 3.4026E-12  | 179.19 |
| DVGSSTTN(de)NSQACAQFIEQYFHNSDITEFMR     | 3566.5467 | IPI00130661 | IPI00130661 | yes | yes | 3,4   |   | 1.3035E-20  | 126.46 |
| DVFIPKPSWGN(de)HTPIFR                   | 2010.0476 | IPI00117312 | IPI00117312 | yes | yes |       | 3 | 0.022711    | 91.969 |
| DTYVN(de)ASQSIYGSSPR                    | 1743.8064 | IPI00122977 | IPI00122977 | yes | no  |       | 2 | 3.6139E-17E | 265.77 |
| DTISIN(de)ATNIK                         | 1188.635  | IPI0012119C | IPI0012119C | yes | no  |       | 2 | 1.09E-64    | 221.55 |
| DTEENIHVIN(de)QTISEVIFPMDIK             | 2684.3367 | IPI0035646E | IPI0035646E | yes | no  |       | 3 | 0.013617    | 64.26  |
| DTCAQECSHFNI(de)TK                      | 1709.7138 | IPI00132474 | IPI00132474 | yes | no  |       | 2 | 2.0947E-26  | 185.95 |
| DTAVEGEEIEVN(de)CTAMASKPATTIR           | 2692.2684 | IPI0085672E | IPI0085672E | yes | no  | 2,3   |   | 5.7656E-08  | 112.58 |
| DSYPDGN(de)ITWYRNGK                     | 1784.8118 | IPI0012137E | IPI0012137E | yes | no  |       | 2 | 0.0001376   | 154.72 |
| DSYPDGN(de)ITWYR                        | 1485.6525 | IPI0012137E | IPI0012137E | yes | no  |       | 2 | 0.0041331   | 107.97 |
| DSKIN(de)NTNVR                          | 1159.5945 | IPI00380801 | IPI00380801 | yes | no  |       | 2 | 8.7779E-05  | 167.12 |
| DSGIWINGFDYTGMSHVTPHIPEIN(de)DTIR       | 3284.5561 | IPI0040722E | IPI0040722E | yes | yes | 3,4   |   | 1.9255E-14  | 146.76 |
| DQQAEEANKN(de)ASIIK                     | 1712.9057 | IPI01016174 | IPI01016174 | yes | no  |       | 3 | 0.0077398   | 103.76 |
| DQGNV(de)TDMASMK                        | 1295.5486 | IPI00471081 | IPI00471081 | yes | yes |       | 2 | 1.3922E-66  | 227.06 |
| DQDCDKF(de)NQCGTCTEFKECHTIQNYTIWR       | 3753.5705 | IPI0012522C | IPI0012522C | yes | no  | 3,4   |   | 0.0043114   | 73.341 |
| DQCIVDDITYNVN(de)DTFHKR                 | 2352.0805 | IPI0011353E | IPI0011353E | yes | no  | 2,3   |   | 6.455E-37   | 199.41 |
| DQCIVDDITYNVN(de)DTFHK                  | 2195.9793 | IPI0011353E | IPI0011353E | yes | no  | 2,3   |   | 8.8629E-37  | 199.41 |
| DNVN(de)CSGVYEHEPIEIGK                  | 2058.9317 | IPI00947577 | IPI00947577 | yes | yes |       | 2 | 0.014157    | 78.021 |
| DNTTC(de)YEFKK                          | 1304.5707 | IPI0011906E | IPI0011906E | yes | yes |       | 2 | 0.000132    | 162.26 |
| DNTTC(de)YEFK                           | 1176.4757 | IPI0011906E | IPI0011906E | yes | yes |       | 2 | 0.003897    | 135.43 |
| DNSCVDPHPVN(de)ATIVTR                   | 1990.9531 | IPI0013001C | IPI0013001C | yes | no  | 2,3   |   | 1.8122E-12  | 171.29 |
| DNKIQIQQN(de)ISIEFIK                    | 1930.0524 | IPI0033067C | IPI0033067C | yes | yes |       | 2 | 0.032577    | 83.087 |
| DNATDS(de)VPIR                          | 1086.5306 | IPI0011906E | IPI0011906E | yes | yes |       | 2 | 5.8108E-27  | 196.11 |

|                                       |           |             |             |     |     |       |   |             |        |
|---------------------------------------|-----------|-------------|-------------|-----|-----|-------|---|-------------|--------|
| DN(de)YSVIIQENKPVGFVSVIK              | 2149.1419 | IPI00623114 | IPI00623114 | yes | no  |       | 2 | 0.0014074   | 107.57 |
| DN(de)HTSCAECIK                       | 1333.5391 | IPI0032060E | IPI0032060E | yes | no  |       | 2 | 0.013545    | 93.839 |
| DN(de)DSIITRK                         | 1060.5513 | IPI0013116E | IPI0013116E | yes | yes |       | 2 | 0.0037714   | 145.25 |
| DN(de)ATQEEIIHYIEK                    | 1701.821  | IPI0092832C | IPI0092832C | yes | no  | 2,3   |   | 7.6723E-08  | 167.69 |
| DMSDGFISN(de)ITIQR                    | 1595.7614 | IPI00272381 | IPI00272381 | yes | no  |       | 2 | 3.8711E-75  | 222.16 |
| DMSDEIGCVN(de)VTQCDGPNK               | 2137.8715 | IPI0031206E | IPI0031206E | yes | no  |       | 2 | 1.1671E-13E | 248.46 |
| DMEEFVQSSGDHGVVFSIGSMVSN(de)MTEEK     | 3274.4468 | IPI0011232E | IPI0011232E | yes | no  |       | 3 | 0.010037    | 46.63  |
| DKWGISDEHFQPRPEAVQFFN(de)VTTIQK       | 3216.5992 | IPI0011137C | IPI0011137C | yes | yes |       | 3 | 0.0027693   | 78.428 |
| DKNGTAEPPIN(de)ASAGDQEEK              | 2226.0513 | IPI0012334E | IPI0012334E | yes | yes | 2,3   |   | 2.1349E-20  | 180.31 |
| DKN(de)GTRAEPINASAGDQEEK              | 2226.0513 | IPI0012334E | IPI0012334E | yes | yes | 2,3   |   | 2.1349E-20  | 180.31 |
| DKISPIHIA(de)INFSIDPK                 | 1907.0516 | IPI0011597E | IPI0011597E | yes | yes | 2,3   |   | 0.0010966   | 125.22 |
| DIVV(de)EISQWMKNPNNTIHPNIR            | 2894.4497 | IPI0031950E | IPI0031950E | yes | no  |       | 3 | 3.4358E-08  | 136.68 |
| DIVQNVFMSN(de)MSMDIQSHPSCPK           | 2751.2125 | IPI0012119C | IPI0012119C | yes | no  |       | 3 | 1.175E-08   | 114.55 |
| DIVGN(de)ITEIESEDIQIEAIIMR            | 2500.2731 | IPI0012239E | IPI0012239E | yes | no  |       | 3 | 1.1962E-40  | 202.39 |
| DITNIIN(de)NTFIR                      | 1432.7674 | IPI0065003E | IPI0065003E | yes | no  |       | 2 | 1.1512E-07  | 162.31 |
| DISVFAPN(de)MTEIHKDVTQYR              | 2339.1831 | IPI0085510E | IPI0085510E | yes | no  |       | 2 | 0.010485    | 88.574 |
| DISGN(de)ETHFTGSEVGFIPISCR            | 2550.2173 | IPI0012365E | IPI0012365E | yes | no  |       | 3 | 5.4059E-08  | 145.71 |
| DINSQIEIQNVN(de)DTHITIIIGIKPDTTYDIK   | 3511.8046 | IPI00110264 | IPI00110264 | yes | yes |       | 3 | 1.2605E-24  | 162.71 |
| DINSQIEIQN(de)VTNDTHITIIIGIKPDTTYDIK  | 3511.8046 | IPI00110264 | IPI00110264 | yes | yes |       | 3 | 1.2605E-24  | 162.71 |
| DIN(de)HTAQGIIEKDSWK                  | 1853.9272 | IPI0012095E | IPI0012095E | yes | no  |       | 3 | 0.0024048   | 122.93 |
| DIMDYKDTTGSHTFQGMFGCEITNN(de)R        | 3200.3638 | IPI0013798E | IPI0013798E | yes | yes |       | 3 | 2.3208E-13  | 131.33 |
| DIKEAGN(de)ITTDGYEIIIGK               | 1935.9789 | IPI0012143C | IPI0012143C | yes | no  |       | 2 | 0.0049766   | 103.66 |
| DIIHSTGHN(de)ISR                      | 1461.7688 | IPI0022398E | IPI0022398E | yes | yes | 2,3   |   | 4.521E-06   | 155.66 |
| DIIFSDTECISNIQN(de)KTTYK              | 2504.1741 | IPI0047108C | IPI0047108C | yes | no  |       | 2 | 0.0038438   | 91.64  |
| DIGPAIAN(de)SSHDVK                    | 1422.7103 | IPI00108811 | IPI00108811 | yes | yes |       | 2 | 2.7275E-75  | 223.06 |
| DIFTNQSDFADTTKDTTITIVIH(de)K          | 2820.4182 | IPI0011610E | IPI0011610E | yes | yes |       | 3 | 1.0709E-08  | 121.25 |
| DIFTN(de)QSDFADTTK                    | 1601.7209 | IPI0011610E | IPI0011610E | yes | no  |       | 2 | 0           | 328.14 |
| DIEHHITNVNVSFYDDIVN(de)GTVIK          | 2741.3661 | IPI0046760C | IPI0046760C | yes | yes |       | 3 | 1.9334E-33  | 191.22 |
| DIEHHITNVN(de)VSFYDDIVNGTVIK          | 2741.3661 | IPI0046760C | IPI0046760C | yes | yes |       | 3 | 1.9334E-33  | 191.22 |
| DIAVGDDYTN(de)R                       | 1237.5575 | IPI00468674 | IPI00468674 | yes | no  |       | 2 | 0.0021933   | 122.7  |
| DHVNVSMEIATDFPFN(de)TTEWEGYIPK        | 3039.396  | IPI0013694E | IPI0013694E | yes | yes |       | 3 | 3.2431E-13  | 119.38 |
| DHVN(de)VSMIEATDFPFNTTEWEGYIPK        | 3039.396  | IPI0013694E | IPI0013694E | yes | yes |       | 3 | 3.2431E-13  | 119.38 |
| DHIIN(de)KTHSICPR                     | 1589.8096 | IPI00118994 | IPI00118994 | yes | yes |       | 2 | 0.017765    | 105    |
| DGTSQPAICPQN(de)VTMNMEGIK             | 2290.0392 | IPI00320204 | IPI00320204 | yes | yes |       | 2 | 3.2633E-75  | 180.86 |
| DGSQDFNE(de)TWENYEK                   | 1860.7439 | IPI0012820E | IPI0012820E | yes | yes |       | 2 | 0.023134    | 114.01 |
| DGSDSAAMVYN(de)SSQEWGIR               | 2071.8905 | IPI0011952E | IPI0011952E | yes | yes |       | 2 | 3.6724E-17E | 269.49 |
| DGQQN(de)ISIIYTEPGASQTQTGASFR         | 2668.2729 | IPI0028481E | IPI0028481E | yes | no  | 2,3   |   | 1.0433E-43  | 194.97 |
| DGQEIHPIETTVNPSGKNVSYN(de)ISSTVR      | 3041.5054 | IPI0077577E | IPI0077577E | yes | no  |       | 3 | 0.0001841   | 89.272 |
| DGQEIHPIETTVNPSGKN(de)VSYNISSTVR      | 3041.5054 | IPI0077577E | IPI0077577E | yes | no  |       | 3 | 0.0001841   | 89.272 |
| DGAIAN(de)ITIR                        | 1084.6241 | IPI0011906E | IPI0011906E | yes | yes |       | 2 | 0.0018371   | 147.62 |
| DGHFKEDPYWENMIN(de)HSVHR              | 2510.1186 | IPI0041079E | IPI0041079E | yes | yes |       | 3 | 0.0017968   | 99.891 |
| DGAFFHHIHPSTPFNGNY(de)SFISVDATQRPGPK  | 3182.5322 | IPI00226714 | IPI00226714 | yes | no  |       | 3 | 2.5537E-13  | 114.39 |
| DEIGN(de)VSTSHIIDDSEMEIRPR            | 2837.4229 | IPI0030903E | IPI0030903E | yes | yes |       | 3 | 0.027095    | 63.225 |
| DDYRPTWTIN(de)QTEPVAGNYYPVNTN         | 2969.3944 | IPI0038130E | IPI0038130E | yes | yes | 2,3   |   | 6.613E-25   | 181.83 |
| DDIHPTIPAGQYFINI(de)TYNYPVHSFDGR      | 3249.552  | IPI0038731E | IPI0038731E | yes | no  | 3,4   |   | 1.2507E-13  | 119.02 |
| DCVSCQN(de)VSR                        | 1223.5023 | IPI0012119C | IPI0012119C | yes | no  |       | 2 | 0.0095447   | 115.29 |
| DCDFIEDGEERN(de)CTGK                  | 1943.7626 | IPI0012728C | IPI0012728C | yes | yes |       | 2 | 1.1618E-18  | 185.27 |
| DAMVGN(de)YTCEVTEISR                  | 1843.808  | IPI0012483C | IPI0012483C | yes | no  |       | 2 | 4.9926E-17E | 270.51 |
| DAHFN(de)STITEFGETINNFVER             | 2440.1295 | IPI0034606E | IPI0034606E | yes | yes |       | 3 | 0.026075    | 73.918 |
| DAAQCSGGSVAHIAEIGIPTN(de)ITHIIFR      | 3060.5815 | IPI00331407 | IPI00331407 | yes | no  |       | 3 | 0.0007581   | 76.471 |
| CVVHYEN(de)STVPEKK                    | 1688.8192 | IPI0040914E | IPI0040914E | yes | yes | 2,3   |   | 3.0359E-36  | 201.48 |
| CVVHYEN(de)STVPEK                     | 1560.7242 | IPI0040914E | IPI0040914E | yes | yes |       | 2 | 0.0020616   | 132.59 |
| CVAN(de)YTGNGR                        | 1110.4876 | IPI0011179E | IPI0011179E | yes | yes |       | 2 | 0.025359    | 99.973 |
| CTAQVCAGYCSNN(de)STCTVNQGNQPQCR       | 3134.2481 | IPI0011906E | IPI0011906E | yes | yes |       | 3 | 0.0011645   | 72.316 |
| CSIIHSN(de)ISVKANVDQRIR               | 2209.175  | IPI0013322E | IPI0013322E | yes | yes |       | 3 | 0.039827    | 42.382 |
| CSIIHSN(de)ISVK                       | 1256.6547 | IPI0013322E | IPI0013322E | yes | no  |       | 2 | 1.9627E-08  | 154.66 |
| CQSPYQMN(de)GSDTVTCINGR               | 2186.9143 | IPI0078844E | IPI0078844E | yes | no  |       | 2 | 0.0007113   | 99.392 |
| CQEAIN(de)ATCK                        | 1193.5169 | IPI0031444E | IPI0031444E | yes | no  |       | 2 | 0.0053032   | 129.82 |
| CQAYKN(de)NSESFIHYMYEVAR              | 2622.1995 | IPI00130654 | IPI00130654 | yes | no  |       | 3 | 0.0042993   | 93.753 |
| CQAIDFFPQN(de)ITMR                    | 1739.8123 | IPI0033144C | IPI0033144C | yes | no  |       | 2 | 0.0004618   | 143.93 |
| CPMAGISHTTWHSN(de)R                   | 1753.7777 | IPI00130764 | IPI00130764 | yes | no  | 2,3   |   | 0.0005353   | 141.54 |
| CPIITPFNDTNVVHTVNTAIAAFNTQNN(de)GTYFK | 3681.7886 | IPI0012824E | IPI0012824E | yes | yes | 3,4   |   | 2.6384E-06  | 88.708 |
| CPIITPFN(de)DTNVVHTVNTAIAAFNTQNGTYFK  | 3681.7886 | IPI0012824E | IPI0012824E | yes | yes | 3,4   |   | 2.6384E-06  | 88.708 |
| CNSVITYN(de)ITPVVQK                   | 1734.8975 | IPI0022296E | IPI0022296E | yes | no  |       | 2 | 0.0008369   | 117    |
| CN(de)ITIKDPTPADPIWYEA                | 2231.0933 | IPI0011484E | IPI0011484E | yes | no  |       | 2 | 2.5626E-18  | 182.31 |
| CN(de)ASSQFICSSGR                     | 1472.6136 | IPI0011906E | IPI0011906E | yes | yes |       | 2 | 0.0004262   | 146.96 |
| CIVPHTVN(de)ISSAWR                    | 1638.83   | IPI00129041 | IPI00129041 | yes | no  |       | 2 | 0.003893    | 138.55 |
| CISPNVTSCACTIN(de)FTIK                | 2084.9693 | IPI0038731E | IPI0038731E | yes | yes |       | 2 | 1.4196E-61  | 214.66 |
| CISPN(de)VTSCACTINFTIK                | 2084.9693 | IPI0038731E | IPI0038731E | yes | yes |       | 2 | 1.4196E-61  | 214.66 |
| CISKN(de)YTTDIITK                     | 1555.7916 | IPI0012464C | IPI0012464C | yes | yes |       | 2 | 1.8845E-21  | 147.73 |
| CIQMSSFAN(de)R                        | 1212.538  | IPI0032006E | IPI0032006E | yes | no  |       | 2 | 3.0931E-77  | 235.01 |
| CIQHFYGPNEHCFN(de)R                   | 2114.8952 | IPI0013042C | IPI0013042C | yes | no  |       | 2 | 0.0024423   | 119.54 |
| CIPHFAMIGNDTVMCTEQGN(de)WTRIEPECIEVK  | 3705.687  | IPI0032246E | IPI0032246E | yes | no  | 3,4   |   | 8.7719E-05  | 85.573 |
| CIPHFAMIGNDTVMCTEQGN(de)WTR           | 2737.1869 | IPI0032246E | IPI0032246E | yes | no  |       | 3 | 1.0379E-09  | 148.2  |
| CIPHFAMIGN(de)DTVMCTEQGNWTRIEPECIEVK  | 3705.687  | IPI0032246E | IPI0032246E | yes | no  | 3,4   |   | 8.7719E-05  | 85.573 |
| CIPHFAMIGN(de)DTVMCTEQGNWTR           | 2737.1869 | IPI0032246E | IPI0032246E | yes | no  |       | 3 | 1.0379E-09  | 148.2  |
| CIN(de)HTTQK                          | 1000.476  | IPI0012526E | IPI0012526E | yes | yes |       | 2 | 0.012795    | 144.12 |
| CHEGN(de)GTFECCGACR                   | 1653.6082 | IPI00132474 | IPI00132474 | yes | yes |       | 2 | 0.0004315   | 150.34 |
| CGNCN(de)ITSIEDEDFCK                  | 1960.7601 | IPI0013759E | IPI0013759E | yes | yes |       | 2 | 3.3069E-23E | 287.91 |
| CFNAMEVDAIN(de)SSHPVSTPVENPAQIR       | 2982.3964 | IPI0031859E | IPI0031859E | yes | no  | 2,3,4 |   | 1.2606E-49  | 198.1  |
| CFMAN(de)GTWGYPFHDGDYIK               | 2277.9612 | IPI0012901C | IPI0012901C | yes | no  | 2,3   |   | 0.0015904   | 101.67 |
| CF(de)ANKVNISFPSAQSPASDTHIK           | 2631.3115 | IPI0062466E | IPI0062466E | yes | yes | 2,3   |   | 3.2122E-18  | 175.52 |
| CEVICN(de)QSNKPITITVEQSR              | 2375.1573 | IPI0062653E | IPI0062653E | yes | yes |       | 2 | 0.0057112   | 90.718 |
| CEQEASEDIKPAITGN(de)KTMQYVPNSHDVK     | 3288.5391 | IPI0013480E | IPI0013480E | yes | no  |       | 3 | 0.0066035   | 58.924 |
| CEQEASEDIKPAITGN(de)K                 | 1888.8837 | IPI0013480E | IPI0013480E | yes | no  |       | 2 | 7.4614E-92  | 235.26 |
| CDGDFDCEDRTDEAN(de)CSVK               | 2291.8365 | IPI0051536C | IPI0051536C | yes | no  |       | 2 | 0.0011016   | 124.29 |

|                                           |           |             |             |     |     |         |   |            |        |
|-------------------------------------------|-----------|-------------|-------------|-----|-----|---------|---|------------|--------|
| CCGWVSHYN(de)WTENEEIMGFTK                 | 2647.093  | IPI0010809E | IPI0010809E | yes | no  |         | 3 | 9.8235E-06 | 113.86 |
| CAMDIGVNYIGTVN(de)VTHTGIQCQIWR            | 3005.431  | IPI0011420E | IPI0011420E | yes | yes |         | 3 | 0.014261   | 55.302 |
| CAISHAITIEFHQDGNPENVGIYN(de)ISR           | 3111.4832 | IPI0022242E | IPI0022242E | yes | yes | 3,4     |   | 7.9279E-19 | 166.65 |
| AYVPN(de)ATWYDYETGEEIGWR                  | 2419.0757 | IPI0084869E | IPI0084869E | yes | yes |         | 2 | 1.8246E-05 | 147.49 |
| AYTIFVPTNHSIETQGN(de)NSVIGIDTVR           | 2945.4883 | IPI0098726E | IPI0098726E | yes | no  |         | 3 | 1.3981E-06 | 97.5   |
| AY(de)AISGPTVQDGIPPFNWNRFNETIHR           | 3099.5315 | IPI00471081 | IPI00471081 | yes | yes |         | 3 | 5.9147E-08 | 104.52 |
| AWN(de)YTVDTPHGMFVSGTPEQSVWITDVGSGPYGHTVK | 4166.9473 | IPI0022856E | IPI0022856E | yes | yes |         | 4 | 0.0004875  | 51.471 |
| AWEKEIHHI(de)QEQNVSNNFIDKEEFFIGSK         | 3500.7365 | IPI00605187 | IPI00605187 | yes | no  | 3,4     |   | 3.4384E-39 | 186.82 |
| AVYEAIRN(de)CSIEDDSVR                     | 1995.932  | IPI00856861 | IPI00856861 | yes | no  |         | 2 | 0.0011079  | 127.83 |
| AVVGSYTTTN(de)VSIIAPR                     | 1747.9468 | IPI00330481 | IPI00330481 | yes | yes |         | 2 | 3.0362E-06 | 159.88 |
| AVTSISHDGSVICTFTAN(de)STYTK               | 2459.1639 | IPI0045348E | IPI0045348E | yes | yes |         | 2 | 1.333E-08  | 137.72 |
| AVN(de)QTGAIYQCDYSTSR                     | 1932.8636 | IPI00120674 | IPI00120674 | yes | no  |         | 2 | 2.0752E-47 | 204.05 |
| AVISMIN(de)ETMNEAPEETK                    | 2005.9336 | IPI0087541E | IPI0087541E | no  | no  | 2,3     |   | 9.4205E-29 | 300.54 |
| AVIGDHGDEIFSVFGSPFIKDGASEEETN(de)ISK      | 3394.6205 | IPI0038728E | IPI0038728E | yes | yes | 3,4     |   | 2.2955E-21 | 158.29 |
| AVDENN(de)ESTACFIIRSGCDVNSPR              | 2710.2075 | IPI0032984E | IPI0032984E | yes | yes |         | 3 | 0.031756   | 67.866 |
| AVCGIN(de)TSDRCDFVR                       | 1768.7985 | IPI00127134 | IPI00127134 | yes | no  |         | 2 | 0.0082643  | 110.92 |
| ATVN(de)DSGEYR                            | 1110.4942 | IPI0012948E | IPI0012948E | yes | no  |         | 2 | 0.0011941  | 155.48 |
| ATTHAQGHQPVIGN(de)DTIR                    | 1914.966  | IPI0012946E | IPI0012946E | yes | yes |         | 2 | 0.022163   | 84.653 |
| ATSQFQN(de)GSIIAFIPGISQCTVYSAK            | 2888.4378 | IPI0034014C | IPI0034014C | yes | yes |         | 3 | 1.0268E-05 | 91.643 |
| ATPNEGFFNQN(de)ITTFYYDR                   | 2297.0389 | IPI0031553E | IPI0031553E | yes | yes | 2,3     |   | 1.4067E-19 | 184.15 |
| ATIITFICDRDAGVGFPEYQEEDN(de)STYNFR        | 3527.594  | IPI00308971 | IPI00308971 | yes | yes |         | 3 | 0.0043742  | 67.31  |
| ATHN(de)DSGSYFCR                          | 1413.5732 | IPI0016287C | IPI0016287C | yes | yes |         | 2 | 0.022619   | 82.202 |
| ATHAQPAIVTAPN(de)ETSPK                    | 1831.9428 | IPI0013795E | IPI0013795E | yes | yes |         | 2 | 0.016444   | 75.564 |
| ASVVN(de)VTQHCTMESWESMNEVAR               | 2664.1731 | IPI0012124C | IPI0012124C | yes | yes |         | 3 | 2.5965E-06 | 107.33 |
| ASSIMVN(de)ITEIFPKPK                      | 1773.9699 | IPI00406901 | IPI00406901 | yes | no  |         | 2 | 1.1813E-35 | 201.3  |
| ASQQISN(de)ETSSFGFNIRK                    | 2126.0756 | IPI0015325E | IPI0015325E | yes | no  |         | 2 | 0.0003522  | 111.22 |
| ASQQISN(de)ETSSFGFNIR                     | 1997.9807 | IPI0015325E | IPI0015325E | yes | no  |         | 3 | 1.064E-26  | 186.72 |
| ASGN(de)FSQVDWFIHK                        | 1747.8682 | IPI0046912E | IPI0046912E | yes | no  |         | 3 | 0.0047222  | 95.981 |
| ARIQGGVIAQIIKN(de)ITIMATTSQFPK            | 2911.6681 | IPI0015405E | IPI0015405E | yes | no  |         | 3 | 4.8704E-13 | 131.33 |
| AQTN(de)YTCVAEIIYR                        | 1700.8192 | IPI0032305E | IPI0032305E | yes | no  |         | 2 | 4.035E-75  | 220.46 |
| AQAGNKSQDSGIAEMEEIPVPHNIKINN(de)ITCDSFK   | 3854.8567 | IPI00969894 | IPI00969894 | yes | yes |         | 4 | 0.022351   | 46.785 |
| AQAGN(de)KSQDSGIAEMEEIPVPHNIKINNITCDSFK   | 3854.8567 | IPI00969894 | IPI00969894 | yes | yes |         | 4 | 0.022351   | 46.785 |
| AQAAIDKAN(de)ASR                          | 1214.6367 | IPI0011906E | IPI0011906E | yes | yes |         | 2 | 0.0003854  | 149.69 |
| APSN(de)VSTVIHIIYIPEEAK                   | 2080.1205 | IPI00121421 | IPI00121421 | yes | no  | 2,3     |   | 0.0002308  | 109.72 |
| APQHVVNHIPPYTN(de)VSIK                    | 2013.0796 | IPI0012304C | IPI0012304C | yes | no  |         | 3 | 0.0043164  | 95.428 |
| APIMPWNESSIFHIPRPVSIN(de)MTVK             | 2863.4877 | IPI0093088E | IPI0093088E | yes | no  |         | 3 | 0.025202   | 64.723 |
| APIMPWN(de)ESSIFHIPRPVSINMTVK             | 2863.4877 | IPI0093088E | IPI0093088E | yes | no  |         | 3 | 0.025202   | 64.723 |
| APDSN(de)SSSIITTR                         | 1460.7471 | IPI0046699E | IPI0046699E | yes | no  |         | 2 | 0.0007116  | 128.06 |
| ANQVIPHN(de)TTFQTEPTK                     | 2038.0484 | IPI00466371 | IPI01026704 | no  | no  | 2,3     |   | 7.8834E-05 | 151.44 |
| ANIQFGENG(de)TISAVTNK                     | 1863.9327 | IPI00127447 | IPI00127447 | yes | yes | 2,3     |   | 9.9933E-15 | 258.8  |
| ANIINFEN(de)NTFVINIEQITQDDTGSYK           | 3197.5517 | IPI0031005E | IPI0031005E | yes | no  | 2,3     |   | 4.4988E-14 | 150.03 |
| ANEQVIQNIN(de)HTYK                        | 1670.8376 | IPI00876541 | IPI00876541 | yes | no  |         | 2 | 0.0013977  | 140.31 |
| ANA(de)STFAVPSVPSNSADTR                   | 1890.9072 | IPI0011906E | IPI0011906E | yes | yes |         | 2 | 0.015995   | 73.918 |
| AN(de)YTIK                                | 821.4647  | IPI0013820E | IPI0013820E | yes | no  |         | 2 | 1.3935E-12 | 182.68 |
| AN(de)TTQPGIVEGGQVIK                      | 1610.8628 | IPI0012024E | IPI0012024E | yes | no  |         | 2 | 2.5563E-05 | 156.11 |
| AN(de)TSIEIIIIEGVR                        | 1413.7827 | IPI0098851E | IPI0098851E | yes | no  |         | 2 | 0.0013836  | 116.63 |
| AN(de)KSSDIVSANR                          | 1260.6422 | IPI0013664E | IPI0013664E | yes | yes |         | 2 | 0.0083967  | 113.99 |
| AN(de)ISSQVIK                             | 958.54475 | IPI00322867 | IPI00322867 | yes | no  |         | 2 | 0.013398   | 119.68 |
| AN(de)HSGAVVIKR                           | 1263.7412 | IPI0042083E | IPI0042083E | yes | no  |         | 2 | 0.013595   | 97.463 |
| AN(de)ESRIEADQIYR                         | 1692.8067 | IPI00224237 | IPI00224237 | yes | no  |         | 2 | 6.7502E-08 | 162.94 |
| AN(de)DTREEAGIPAAGEDETSWTER               | 2504.1052 | IPI00653847 | IPI00653847 | yes | no  |         | 3 | 0.0080982  | 80.142 |
| AN(de)DSDQGANAIEIDYTFHQAPEVVR             | 2802.2957 | IPI00719927 | IPI00719927 | yes | no  |         | 3 | 7.7893E-09 | 143.04 |
| AN(de)DSDQGANAIEIDYTFHQAPEVVR             | 2646.1946 | IPI00719927 | IPI00719927 | yes | no  | 2,3     |   | 8.3534E-09 | 143.91 |
| AMN(de)TSQVEAMGIQMPGYRDPYHGRPITK          | 3260.5893 | IPI0016987C | IPI0016987C | yes | yes |         | 3 | 7.5267E-07 | 92.147 |
| AMN(de)ISASSMTITWK                        | 1539.7425 | IPI0046942E | IPI0046942E | yes | no  |         | 2 | 2.977E-75  | 220.46 |
| AMIINQHVPMESSHIIQFVN(de)WSSIIPERYK        | 3694.9116 | IPI0038728E | IPI0038728E | yes | yes | 3,4,5,6 |   | 8.476E-08  | 94.594 |
| AMIINQHVPMESSHIIQFVN(de)WSSIIPERYK        | 3566.8167 | IPI0038728E | IPI0038728E | yes | yes | 3,4     |   | 4.1176E-15 | 113.31 |
| AMIINQHVPMESSHIIQFVN(de)WSSIIPER          | 3275.6584 | IPI0038728E | IPI0038728E | yes | yes | 3,4,5   |   | 4.4463E-14 | 140.59 |
| AMGVNVIAANTHN(de)TSMHMTGSGIYSPEAVR        | 3115.4638 | IPI0023041E | IPI0023041E | yes | yes | 3,4     |   | 9.4849E-16 | 112.48 |
| AMFN(de)ITIIYPNNIIAISNMIPK                | 2490.3379 | IPI0031950E | IPI0031950E | yes | yes | 2,3     |   | 8.53E-07   | 147.35 |
| AISPN(de)STISSAPK                         | 1271.6721 | IPI00460291 | IPI00460291 | yes | no  |         | 2 | 0.0014887  | 116.19 |
| AINASAN(de)ITSDGVEVIGR                    | 1785.9221 | IPI0033063E | IPI0033063E | yes | no  |         | 2 | 6.1681E-20 | 273.78 |
| AIN(de)VTISSMGRNGIK                       | 1559.8454 | IPI00131091 | IPI00131091 | yes | no  |         | 2 | 0.012135   | 109.84 |
| AIN(de)VTISSMGR                           | 1147.6019 | IPI00131091 | IPI00131091 | yes | no  |         | 2 | 3.6127E-05 | 155.86 |
| AIN(de)SSTEDGIK                           | 1133.5564 | IPI0012916E | IPI0012916E | yes | yes |         | 2 | 0.010755   | 101.39 |
| AIN(de)GSAIYTGSIDFVR                      | 1769.8948 | IPI00877197 | IPI00877197 | yes | no  | 2,3     |   | 0          | 326.05 |
| AIN(de)DSIHYINR                           | 1314.668  | IPI0080834E | IPI0080834E | yes | no  |         | 2 | 9.981E-05  | 151.1  |
| AIN(de)ASANITSDGVEVIGR                    | 1785.9221 | IPI0033063E | IPI0033063E | yes | no  |         | 2 | 6.1681E-20 | 273.78 |
| AIMKEVMNIIQPIN(de)VTK                     | 1941.0791 | IPI0012605C | IPI0012605C | yes | no  | 2,3     |   | 0.0019582  | 138.97 |
| AIMDIDCQIEKN(de)QTK                       | 1805.8652 | IPI0065863E | IPI0065863E | yes | yes |         | 2 | 4.8222E-50 | 164.15 |
| AIIQGIPEQN(de)YTVQIIAYYKDK                | 2680.4476 | IPI0033063E | IPI0033063E | yes | no  |         | 3 | 0.027557   | 69.148 |
| AIIQGIPEQN(de)YTVQIIAYYK                  | 2437.3257 | IPI0033063E | IPI0033063E | yes | no  |         | 3 | 0.0070421  | 77.506 |
| AIGYEN(de)ATQAIGR                         | 1362.6892 | IPI0011980E | IPI0011980E | yes | no  |         | 2 | 3.4119E-44 | 203.87 |
| AIGITEMFEPSKAN(de)FTK                     | 1882.9499 | IPI0011506E | IPI0011506E | yes | yes |         | 2 | 0.0031496  | 138.05 |
| AIEIQFGMN(de)ASSSIFFIQGV                  | 2314.178  | IPI0046921E | IPI0046921E | yes | yes |         | 3 | 0.0049735  | 81.51  |
| AIDIDPSKTN(de)VSGGAIAGHPIGGSGSR           | 2646.3725 | IPI0022643C | IPI0022643C | yes | yes | 3,4     |   | 2.3498E-38 | 189.84 |
| AIAGIVYN(de)SSGTEPCYDIYR                  | 2248.047  | IPI0033155C | IPI0033155C | yes | yes | 2,3     |   | 4.6269E-29 | 192.6  |
| AHFSSIN(de)ITIR                           | 1257.683  | IPI00466371 | IPI01026704 | no  | no  |         | 2 | 1.7749E-29 | 186.81 |
| AGYFN(de)FTSATITYIAQEDGPVIGSTSAPGQGGIIAQR | 3856.9272 | IPI0046718C | IPI0046718C | yes | yes | 3,4     |   | 1.097E-33  | 122.7  |
| AGVVFN(de)CSIR                            | 1220.6336 | IPI0031477E | IPI0031477E | yes | yes |         | 2 | 0.010265   | 99.215 |
| AGPN(de)GTIFVVDAYK                        | 1450.7456 | IPI0022199E | IPI0022199E | yes | yes |         | 2 | 5.1633E-27 | 192.32 |
| AGIN(de)ASYSEK                            | 1038.4982 | IPI00308971 | IPI00308971 | yes | yes |         | 2 | 0.001301   | 155    |
| AGEQINNHVKN(de)KTQGK                      | 1764.9231 | IPI0011610E | IPI0011610E | yes | no  | 2,3     |   | 0.0001269  | 155.57 |
| AGEQINNHVKN(de)K                          | 1350.7004 | IPI0011610E | IPI0011610E | yes | no  |         | 2 | 0.020861   | 136.53 |
| AFYN(de)GTWYRR                            | 1332.6364 | IPI0085831E | IPI0085831E | yes | no  |         | 2 | 0.027548   | 98.033 |
| AFYN(de)GTWYR                             | 1176.5352 | IPI0085831E | IPI0085831E | yes | no  |         | 2 | 0.012374   | 120.99 |



|                                    |           |             |             |     |     |     |              |        |
|------------------------------------|-----------|-------------|-------------|-----|-----|-----|--------------|--------|
| AFVEN(de)ITVIENSIVFK               | 1821.9877 | IPI0074238E | IPI0074238E | yes | no  | 2,3 | 0            | 357.71 |
| AFNISPN(de)DTSSGSCGINIVTIK         | 2294.1213 | IPI0046921E | IPI0046921E | yes | yes | 2,3 | 3.3828E-06   | 137.12 |
| AFN(de)ITWISTDFK                   | 1441.7242 | IPI0011806E | IPI0011806E | yes | no  |     | 2 4.1559E-08 | 166.48 |
| AFN(de)ECCTIANK                    | 1326.5697 | IPI0033083E | IPI0033083E | yes | yes |     | 2 1.5991E-15 | 185.25 |
| AFMN(de)SSFTIDPK                   | 1356.6384 | IPI0012136E | IPI0012136E | yes | no  |     | 2 4.5096E-06 | 155.86 |
| AFITNF(de)SMIIDGVTYPGVVK           | 2171.1337 | IPI00312711 | IPI00312711 | yes | no  | 2,3 | 3.3094E-50   | 208.49 |
| AFIN(de)GTGVETVVSADIPNAHGIAVDWVSR  | 2994.5199 | IPI0011906E | IPI0011906E | yes | yes | 3,4 | 3.2171E-19   | 162.01 |
| AFFDETKN(de)NTR                    | 1341.6313 | IPI00120674 | IPI00120674 | yes | no  |     | 2 0.0036529  | 138.99 |
| AEQITIHAIGIGEANKT(de)QIR           | 2162.1808 | IPI0067579E | IPI0067579E | yes | no  | 3   | 0.010911     | 85.937 |
| AEPPINASAGDQ(de)EEK                | 1554.7162 | IPI0012334E | IPI0012334E | yes | yes |     | 2 0.0005839  | 146.2  |
| AEISN(de)HTRPVIIIPGCIGNRIEAK       | 2643.4279 | IPI0013350C | IPI0013350C | yes | yes | 3,4 | 0.0005349    | 91.64  |
| AEISN(de)HTRPVIIIPGCIGNR           | 2202.1692 | IPI0013350C | IPI0013350C | yes | yes | 2,3 | 2.5303E-05   | 136.34 |
| AEDYGPVEVISHWHPN(de)ITINIVDDHTPWVK | 3480.7103 | IPI0012162E | IPI0012162E | yes | yes | 3,4 | 7.5641E-06   | 90.1   |
| ADSIYSQVVGISASQAN(de)ISK           | 2037.0378 | IPI0011511E | IPI0011511E | yes | yes | 2,3 | 3.4057E-23E  | 280.62 |
| ADN(de)YTYEHIR                     | 1280.5786 | IPI0027313E | IPI0027313E | yes | yes |     | 2 0.028903   | 89.548 |
| ADANPPATEYHWTTIN(de)GSIPK          | 2282.0968 | IPI0031140E | IPI0031140E | yes | yes | 2,3 | 4.2008E-06   | 130.89 |
| ACN(de)ATNWIEMYFNK                 | 1760.7651 | IPI0013260C | IPI0013260C | yes | no  |     | 2 3.0161E-08 | 160.78 |
| AAN(de)CTQVIVWHTR                  | 1554.7725 | IPI00116744 | IPI00116744 | yes | yes |     | 2 0.030557   | 76.01  |
| AAGVIEDVYN(de)RTQGIIAGHGIIQIA      | 2578.3867 | IPI00169617 | IPI00169617 | yes | yes |     | 2 4.801E-08  | 112.47 |
| AAGVIEDVYN(de)R                    | 1205.6041 | IPI00169617 | IPI00169617 | yes | yes |     | 2 7.2755E-08 | 138.76 |
| AAEN(de)FTIIVK                     | 1104.6179 | IPI0047108E | IPI0047108E | yes | no  |     | 2 0.0022375  | 129.82 |
| AACAVRPQEVMTMVN(de)GTITNPVTGK      | 2513.273  | IPI00308971 | IPI00308971 | yes | yes | 2,3 | 4.3569E-08   | 118.37 |
| A(de)YVFERNQSVGDPNVDIIR            | 2191.1022 | IPI00127447 | IPI00127447 | yes | yes | 2,3 | 1.8175E-48   | 209.66 |
| A(de)VAYGEKNITFQGPIPK              | 1831.9832 | IPI00111794 | IPI00111794 | yes | no  | 2,3 | 6.6698E-09   | 168.69 |
| A(de)RNISGVVIADHSGSFHNR            | 2036.03   | IPI00118674 | IPI00118674 | yes | yes |     | 3 0.0005256  | 123.59 |

N-terminal Ser/Thr ratio 15 1.08%

### Conventional HC strategy 2

#### De-glycopeptides Sequence

| De-glycopeptides Sequence        | Mass      | Proteins    | Leading r   | Unique (C | Unique (P | Charges | PEP           | Score  |
|----------------------------------|-----------|-------------|-------------|-----------|-----------|---------|---------------|--------|
| YYN(de)YTISINGK                  | 1334.6507 | IPI0022142E | IPI0022142E | yes       | yes       |         | 2 0.0007149   | 155.48 |
| YYN(de)QSKGGSHTFQR               | 1671.7754 | IPI00850057 | IPI00850057 | no        | no        |         | 2 0.0023752   | 132.97 |
| YYN(de)QSAGGSHTIQWMAGCDVESDGR    | 2788.1606 | IPI0098582E | IPI0098582E | yes       | no        |         | 3 6.6265E-84  | 258.37 |
| YYHGEISYIN(de)VTRK               | 1741.8788 | IPI00404551 | IPI00404551 | yes       | no        | 2,3     | 1.6875E-06    | 168.89 |
| YYHGEISYIN(de)VTR                | 1613.7838 | IPI00404551 | IPI00404551 | yes       | no        | 2,3     | 8.0537E-14    | 184.98 |
| YVYVADIIAHEIHVIEKQPNMN(de)ITQIK  | 3178.6849 | IPI00310567 | IPI00310567 | yes       | yes       | 3,4     | 5.8569E-69    | 249.2  |
| YVMIPVADQDKCVVHYEN(de)STVPEKK    | 2948.4412 | IPI0040914E | IPI0040914E | yes       | yes       |         | 3 5.5065E-09  | 159.06 |
| YTSFEYPKNISFA(de)CNPGFINGTSSSK   | 3062.412  | IPI0032246E | IPI0032246E | yes       | no        |         | 3 1.9882E-24  | 207.86 |
| YTSFEYPKN(de)ISFACNPGFFINGTSSSK  | 3062.412  | IPI0032246E | IPI0032246E | yes       | no        |         | 3 1.9882E-24  | 207.86 |
| YTGN(de)ASAIIPDQGR               | 1687.8893 | IPI0013183C | IPI0013183C | yes       | no        | 2,3     | 1.9261E-77    | 260.24 |
| YTGN(de)ASAIIPDQGR               | 1721.8737 | IPI0013563E | IPI0013563E | yes       | no        | 2,3     | 4.64E-13      | 195.89 |
| YSVQHMYFTYN(de)ISDTEHFPNAISK     | 2891.3225 | IPI0046921E | IPI0046921E | yes       | yes       | 3,4     | 2.5493E-07    | 172.69 |
| YSVIITAEKPVGDISSPN(de)ETK        | 2247.1634 | IPI00125497 | IPI00125497 | yes       | yes       | 2,3     | 3.4224E-08    | 184.56 |
| YSQAAN(de)STKEIDDCEQANK          | 2170.9437 | IPI0018735E | IPI0018735E | yes       | yes       |         | 2 0.0008741   | 124.31 |
| YSNESQDISVNGYN(de)CTTSSVSSAIR    | 2738.209  | IPI00322304 | IPI00322304 | yes       | yes       | 2,3     | 3.103E-16     | 160.84 |
| YSN(de)ESQDISVNGYNCTTSSVSSAIR    | 2738.209  | IPI00322304 | IPI00322304 | yes       | yes       | 2,3     | 3.103E-16     | 160.84 |
| YSIYKDPAGWISINPIN(de)GTVDTTAVIDR | 3078.5662 | IPI0012374E | IPI0012374E | yes       | yes       |         | 3 1.817E-05   | 99.614 |
| YRAEFAVAN(de)DTGFVDIPQKEK        | 2397.1601 | IPI00128154 | IPI00128154 | yes       | no        | 2,3     | 8.5064E-28    | 218.79 |
| YQTIN(de)CSVNVN                  | 1352.6507 | IPI0042083E | IPI0042083E | yes       | no        |         | 2 0.0028127   | 132.17 |
| YQMDN(de)VSSIVQIIGSHIEDVNADIIQTK | 3129.5652 | IPI00330594 | IPI00330594 | yes       | yes       | 3,4     | 2.1055E-11    | 140.45 |
| YQHVGQVIFQAPEAGGRWN(de)QTQK      | 2754.399  | IPI00894972 | IPI00894972 | yes       | no        |         | 3 4.2253E-07  | 180.31 |
| YQFNTNVVFSND(de)GTIVDR           | 2087.9912 | IPI0032137E | IPI0032137E | yes       | no        | 2,3     | 1.5995E-08    | 189.77 |
| YQFEVICPAPRPGAASN(de)ISFQAPFR    | 2822.3963 | IPI0031115E | IPI0031115E | yes       | yes       |         | 3 1.2639E-08  | 128.67 |
| YQEIIIEISSIN(de)KTQWK            | 2108.079  | IPI0099093E | IPI0099093E | yes       | no        | 2,3     | 1.3759E-13E   | 294.05 |
| YQEGDITIYVINIHN(de)VTK           | 2119.095  | IPI0017009E | IPI0017009E | yes       | no        |         | 2 2.3568E-05  | 176.11 |
| YPTPGEAPGVVGNFN(de)K             | 1645.81   | IPI00112614 | IPI00112614 | yes       | yes       |         | 2 0.0004048   | 141.85 |
| YPQDYQFYIQN(de)FTAIPINTVPPQR     | 3011.5181 | IPI0011085E | IPI0011085E | yes       | no        | 2,3,4   | 9.3345E-10    | 180.8  |
| YPNN(de)GSIVWGK                  | 1233.6142 | IPI0084869E | IPI0084869E | yes       | yes       |         | 2 4.2663E-05  | 163.12 |
| YPHNHHVVNNTIEGNC(de)SSK          | 2205.9974 | IPI0022142E | IPI0022142E | yes       | yes       |         | 3 0.036124    | 69.979 |
| YPHNHHVVNNTIEGN(de)CSSK          | 2205.9974 | IPI0022142E | IPI0022142E | yes       | yes       |         | 3 0.036124    | 69.979 |
| YPHKPEIN(de)STTHPGADIKENFCR      | 2710.2922 | IPI0011420E | IPI0011420E | yes       | yes       |         | 3 0.0014367   | 105.91 |
| YPHKPEIN(de)STTHPGADIK           | 2004.0065 | IPI0011420E | IPI0011420E | yes       | yes       | 2,3     | 0.0005818     | 166.48 |
| YPAEGQRPIPN(de)VSIPR             | 1906.0425 | IPI00453524 | IPI00453524 | yes       | yes       | 2,3     | 0.0006405     | 142.45 |
| YN(de)HTGQVVIYK                  | 1320.6826 | IPI00466371 | IPI01026704 | no        | no        | 2,3     | 0.0002469     | 160.67 |
| YN(de)GSIGIWR                    | 1064.5403 | IPI0013329E | IPI0013329E | yes       | no        |         | 2 0.019871    | 117.7  |
| YMGIPEDNIDHYRN(de)STVMSR         | 2607.221  | IPI0012581E | IPI0012581E | yes       | no        | 2,3     | 0.0020032     | 96.544 |
| YMDQNSDGWQDGVGYIN(de)SSEGAVGR    | 2704.146  | IPI0011423E | IPI0011423E | yes       | no        |         | 3 3.0204E-07  | 122.34 |
| YMAIAIN(de)R                     | 950.50077 | IPI00123814 | IPI00123814 | yes       | yes       |         | 2 0.029971    | 113.7  |
| YKYETTISPTSNISSNSFICIEN(de)R     | 2823.3385 | IPI0062583E | IPI0062583E | yes       | no        |         | 3 2.9837E-39  | 223.89 |
| YKYETTISPTSN(de)ISSNSFICIENR     | 2823.3385 | IPI0062583E | IPI0062583E | yes       | no        |         | 3 2.9837E-39  | 223.89 |
| YKGTAGNAIMDGASQIVGEN(de)R        | 2151.0379 | IPI0027907E | IPI0027907E | yes       | yes       | 2,3     | 7.8819E-05    | 171.84 |
| YKGN(de)ASAIIPDQGR               | 1748.921  | IPI0012807E | IPI0012807E | yes       | yes       |         | 2 0.0070309   | 110.12 |
| YKGIN(de)ITEDTYKPR               | 1696.8784 | IPI0011980E | IPI0011980E | yes       | yes       |         | 2 4.6929E-17E | 311.99 |
| YIYIASN(de)HSNK                  | 1308.6463 | IPI0011817E | IPI0011817E | yes       | no        |         | 2 0.0081211   | 108.7  |
| YIQVVYIHNND(de)ISAVGQNDFCR       | 2623.2602 | IPI0012319E | IPI0012319E | yes       | yes       |         | 3 1.1425E-64  | 248.18 |
| YIQPIAVQFTN(de)ITVDTEIR          | 2333.2631 | IPI0012155C | IPI0012155C | yes       | yes       | 2,3     | 2.2121E-08    | 188.26 |
| YIN(de)FSTSEKEK                  | 1344.6561 | IPI0013501C | IPI0013501C | yes       | no        |         | 2 0.0044621   | 134.3  |
| YIN(de)ETQQITQKIKTK              | 1835.0153 | IPI0012322E | IPI0012322E | yes       | yes       |         | 2 0.010629    | 115.1  |
| YIN(de)ETQQITQKIK                | 1605.8726 | IPI0012322E | IPI0012322E | yes       | yes       |         | 2 1.2402E-13  | 186.16 |
| YIN(de)ETQQITQK                  | 1364.6936 | IPI0012322E | IPI0012322E | yes       | yes       |         | 2 2.407E-16   | 187.85 |
| YIKNGN(de)ATIIR                  | 1261.7143 | IPI0098582E | IPI0098582E | no        | no        | 2,3     | 4.2568E-11    | 184.24 |
| YIKNGN(de)ATIIR                  | 1261.7143 | IPI0098582E | IPI0098582E | no        | no        | 2,3     | 4.2568E-11    | 184.24 |
| YIINGSHAN(de)ETR                 | 1373.6688 | IPI0012996E | IPI0012996E | yes       | yes       |         | 2 0.0061022   | 107.65 |
| YIIN(de)GSHANETR                 | 1373.6688 | IPI0012996E | IPI0012996E | yes       | yes       |         | 2 0.0061022   | 107.65 |
| YIEIGN(de)ETIIR                  | 1319.7085 | IPI00850057 | IPI00850057 | yes       | no        |         | 2 3.4822E-24  | 206.36 |



|                                          |           |             |             |     |     |       |              |        |
|------------------------------------------|-----------|-------------|-------------|-----|-----|-------|--------------|--------|
| YHYN(de)GTIDGTIFDSSYSR                   | 2208.0124 | IPI0013048€ | IPI0013048€ | yes | yes | 2,3   | 2.325E-27    | 215.98 |
| YHYN(de)GTFIDGTIFDSSHNR                  | 2243.0032 | IPI0013048€ | IPI0013048€ | yes | yes |       | 2 2.8036E-37 | 226.57 |
| YHYN(de)CSIIDGTR                         | 1497.6671 | IPI0012249€ | IPI0012249€ | yes | no  |       | 2 0.020508   | 90.793 |
| YHYN(de)ASIIDGTIDSTWNIGK                 | 2380.1699 | IPI0013048€ | IPI0013048€ | yes | yes |       | 3 0.0001119  | 124.68 |
| YHVIHIN(de)TTK                           | 1224.6615 | IPI00131021 | IPI00131021 | yes | yes |       | 2 0.018875   | 105.98 |
| YHHYSSN(de)FSIPK                         | 1478.6943 | IPI0012948€ | IPI0012948€ | yes | no  | 2,3   | 6.0177E-19   | 196.24 |
| YHGFIN(de)TSYHR                          | 1393.6527 | IPI0015405€ | IPI0015405€ | yes | no  | 2,3   | 0.0009137    | 152.7  |
| YHDYYITSTSN(de)GSIEGIENR                 | 2318.0451 | IPI00130754 | IPI00130754 | yes | yes |       | 3 0.0007777  | 108.75 |
| YGTAIVHIYVNETIAN(de)R                    | 1933.0058 | IPI00719927 | IPI00719927 | yes | no  |       | 2 0.00437    | 118.31 |
| YGTAIVHIYVN(de)ETIANR                    | 1933.0058 | IPI00719927 | IPI00719927 | yes | no  |       | 2 0.00437    | 118.31 |
| YGN(de)MTQDHSVMIITR                      | 1814.8556 | IPI0011589€ | IPI0011589€ | yes | no  | 2,3   | 0.0024611    | 107.65 |
| YGMQNSGNEAAWN(de)YTIEQYQK                | 2494.0859 | IPI0013458€ | IPI0013458€ | yes | yes | 2,3   | 3.8767E-95   | 268.25 |
| YGKN(de)DSITITQIK                        | 1479.7933 | IPI0012342€ | IPI0012342€ | yes | no  | 2,3   | 8.3662E-42   | 232.37 |
| YGIVVIDECPGVGIVIPQSFGN(de)ESIR           | 2817.4371 | IPI0030923€ | IPI0030923€ | yes | no  |       | 3 4.1719E-09 | 145.44 |
| YGHPNGTQGN(de)STMWPVFTSTEQK              | 2566.1547 | IPI0013116€ | IPI0013116€ | yes | yes |       | 3 2.5164E-05 | 114.46 |
| YGHPN(de)GTQGNSTMWPVFTSTEQK              | 2566.1547 | IPI0013116€ | IPI0013116€ | yes | yes |       | 3 2.5164E-05 | 114.46 |
| YFTNRI(de)DVSQNVSSDTDQSCESTK             | 2780.2195 | IPI0012076€ | IPI0012076€ | yes | no  |       | 3 2.1599E-06 | 154.84 |
| YFFIQSVSDSDGRN(de)FTSSPPGQTQFK           | 2852.3406 | IPI0034468€ | IPI0034468€ | yes | yes |       | 3 9.9149E-24 | 203.71 |
| YEVVDWNQSTIDCVDPISIAAN(de)R              | 2652.2126 | IPI0033103€ | IPI0033103€ | yes | no  | 2,3   | 6.0207E-15   | 200.99 |
| YEVVDWN(de)QSTIDCVDPISIAANR              | 2652.2126 | IPI0033103€ | IPI0033103€ | yes | no  | 2,3   | 6.0207E-15   | 200.99 |
| YEQIQN(de)ETR                            | 1179.552  | IPI0015405€ | IPI0015405€ | yes | no  |       | 2 0.0019903  | 164.65 |
| YEQAKN(de)ISQDIEK                        | 1564.7733 | IPI0040001€ | IPI0040001€ | yes | no  |       | 2 0.0073126  | 152.88 |
| YE(de)TEKNNGAGYFIEHIAFK                  | 2230.0695 | IPI0011188€ | IPI0011188€ | yes | no  |       | 3 0.0002611  | 171.56 |
| YDVN(de)RSDSGGSIQIEEGYFVHHFAPENIPTMSK    | 3723.7264 | IPI00312711 | IPI00312711 | yes | no  | 3,4   | 9.499E-15    | 122.8  |
| YDKSEVDGAAAMIN(de)YTHIIMEAVPGHPAIYR      | 3431.6642 | IPI0087485€ | IPI0087485€ | yes | no  | 3,4   | 4.9929E-15   | 149.62 |
| YDIPASINYIIN(de)K                        | 1522.8031 | IPI0012926€ | IPI0012926€ | yes | yes |       | 2 0.0002328  | 159.08 |
| YAVYWN(de)SSNPR                          | 1355.6258 | IPI00114364 | IPI00114364 | yes | no  |       | 2 0.0048513  | 119.76 |
| YATENDISSIHNSTITCIVN(de)QTTSTITGTSPEIMEK | 3854.819  | IPI0023031€ | IPI0023031€ | yes | no  | 3,4   | 3.3432E-12   | 114.35 |
| YATENDISSIHN(de)STITCIVNQTTSTITGTSPEIMEK | 3854.819  | IPI0023031€ | IPI0023031€ | yes | no  | 3,4   | 3.3432E-12   | 114.35 |
| YAFQEIIIGDISFIPTIN(de)FSK                | 2415.2726 | IPI00122557 | IPI00122557 | yes | no  | 2,3   | 9.4661E-34   | 195.96 |
| WVITAAHCIIYPPWDKN(de)FTENDIIVR           | 3170.6012 | IPI0011420€ | IPI0011420€ | yes | yes | 3,4   | 5.1621E-06   | 117.31 |
| WVGN(de)WTYEIK                           | 1294.6346 | IPI0015314€ | IPI0015314€ | yes | yes |       | 2 0.01621    | 108.7  |
| WVDGASIN(de)FSHWNSGEPNDSR                | 2374.0363 | IPI0022335€ | IPI0022335€ | yes | yes | 2,3   | 0.0001248    | 121.46 |
| WTGHN(de)VTVVQR                          | 1295.6735 | IPI0011906€ | IPI0011906€ | yes | yes | 2,3   | 0.0021103    | 136.96 |
| WTDNTEYN(de)NTIPIRGEER                   | 2207.0243 | IPI0027643€ | IPI0027643€ | yes | yes | 2,3   | 0.0002945    | 147.56 |
| WSN(de)DSATISFTKPWSQK                    | 2038.9749 | IPI0032006€ | IPI0032006€ | yes | no  | 2,3   | 1.1068E-05   | 181.41 |
| WSFSN(de)GTSWQK                          | 1326.5993 | IPI0031557€ | IPI0031557€ | yes | yes |       | 2 2.2279E-12 | 192.5  |
| WQN(de)DTGSPDKSDISQK                     | 1804.8228 | IPI0022230€ | IPI0022230€ | yes | yes |       | 2 6.4596E-37 | 224.59 |
| WKPPSDPNGN(de)ITHYIVYWER                 | 2471.2022 | IPI0012835€ | IPI0012835€ | yes | no  |       | 3 0.000177   | 146.81 |
| WIQQEFHNSN(de)ASIPHTHIVTFNVIEK           | 2837.4501 | IPI0062434€ | IPI0062434€ | yes | yes |       | 3 3.0912E-07 | 141.31 |
| WIN(de)ETQIK                             | 1030.5447 | IPI00453524 | IPI00453524 | yes | yes |       | 2 0.01478    | 131.06 |
| WIIVGAPTASWISN(de)ASVVNPGAIYR            | 2641.4017 | IPI00121334 | IPI00121334 | yes | no  |       | 3 0.0004503  | 89.668 |
| WICDGDNDCGNSEDESN(de)ATCSAR              | 2631.9497 | IPI0011906€ | IPI0011906€ | yes | yes | 2,3   | 8.1908E-06   | 111.53 |
| WICDGDN(de)DCGNSEDESNATCSAR              | 2631.9497 | IPI0011906€ | IPI0011906€ | yes | yes | 2,3   | 8.1908E-06   | 111.53 |
| WGHN(de)VTEFQQR                          | 1400.6585 | IPI0075438€ | IPI0075438€ | yes | yes | 2,3   | 0.0011476    | 146.16 |
| WGEVDIIGN(de)CSQFYPDR                    | 2054.9156 | IPI0032067€ | IPI0032067€ | yes | yes |       | 2 6.6402E-14 | 202.96 |
| WFHN(de)ESIIPHQDANYVIQSAR                | 2524.2248 | IPI0016287€ | IPI0016287€ | yes | yes |       | 3 0.0001001  | 152.01 |
| WECKN(de)DTIFGIK                         | 1509.7286 | IPI0012618€ | IPI0012618€ | yes | yes | 2,3   | 0.0036778    | 145.31 |
| WASVVVPIGKEQN(de)YTCR                    | 2006.0044 | IPI0010999€ | IPI0010999€ | yes | no  | 2,3   | 0.0001556    | 154.51 |
| WASVVVPIGKEQN(de)YTCHVYHEGIPEPITIR       | 3491.766  | IPI01026927 | IPI01026927 | yes | no  | 3,4   | 1.7982E-06   | 107.88 |
| WAAVVVPIGKEQN(de)YTCHVHHK                | 2472.2485 | IPI00850057 | IPI00850057 | yes | no  | 2,3,4 | 1.4075E-05   | 179.14 |
| VYVYAVN(de)QTR                           | 1211.6299 | IPI00466371 | IPI01026704 | no  | no  |       | 2 4.1391E-15 | 198.25 |
| VYTYADTPNDFQISN(de)FSIPEEDTKIKIPIIHQAIAK | 4048.0833 | IPI00108811 | IPI00108811 | yes | yes |       | 4 3.2125E-07 | 85.185 |
| VYTYADTPNDFQISN(de)FSIPEEDTKIK           | 3034.4448 | IPI00108811 | IPI00108811 | yes | yes |       | 3 1.327E-09  | 138.04 |
| VYTYADTPNDFQISN(de)FSIPEEDTK             | 2793.2657 | IPI00108811 | IPI00108811 | yes | yes |       | 3 0.0016084  | 86.557 |
| VYTVSSSPSCYMYVVVN(de)TTEVAIEQDIAYIQEIK   | 3962.8846 | IPI00136012 | IPI00136012 | yes | yes |       | 4 0.0005156  | 66.501 |
| VYSIPGREN(de)YSSVDANGIQSQMISR            | 2770.3344 | IPI0012710€ | IPI0012710€ | yes | yes |       | 3 7.0241E-08 | 168.68 |
| VYMKN(de)VTVVIR                          | 1320.7588 | IPI0046921€ | IPI0046921€ | yes | yes | 2,3   | 7.7034E-05   | 164.33 |
| VYIN(de)DSVEISRNEK                       | 1778.8799 | IPI0012676€ | IPI0012676€ | yes | yes |       | 2 4.8912E-63 | 250.52 |
| VYIN(de)DSVEISR                          | 1293.6565 | IPI0012676€ | IPI0012676€ | yes | yes |       | 2 1.1687E-08 | 182.71 |
| VYIHPFHIIYHN(de)K                        | 1679.8936 | IPI0065406€ | IPI0065406€ | yes | yes | 2,3   | 1.6694E-09   | 176.48 |
| VYHQAGYIN(de)FSITDDMIPHDSGIR             | 2748.2966 | IPI0012606€ | IPI0012606€ | yes | no  |       | 3 1.1337E-06 | 135.49 |
| VYGQNNIN(de)ETWSR                        | 1579.7379 | IPI0076260€ | IPI0076260€ | yes | no  |       | 2 6.8972E-06 | 164.68 |
| VYGGIVN(de)QSEINEGTAFRR                  | 2100.0276 | IPI0041628€ | IPI0041628€ | yes | yes |       | 2 1.211E-62  | 250.47 |
| VWPDYPN(de)ITVDPSIGWDHQVEQYR             | 2913.3722 | IPI0084869€ | IPI0084869€ | yes | yes |       | 3 0.0023479  | 81.016 |
| VWPDGVIPFVIGGN(de)FTGSQR                 | 2145.1007 | IPI0012518€ | IPI0012518€ | yes | no  | 2,3   | 4.1423E-05   | 162.59 |
| VWN(de)STFIEDYKDFDR                      | 1933.8846 | IPI00468674 | IPI00468674 | yes | no  | 2,3   | 2.5815E-14   | 194.77 |
| VWN(de)QTEQEPAAAYHIISICFVR               | 2560.2533 | IPI0012907€ | IPI0012907€ | yes | no  |       | 3 0.0001347  | 120.9  |
| VVSVDISFRPIN(de)ETFPVVYIETPKR            | 2904.5749 | IPI0062466€ | IPI0062466€ | yes | yes | 3,4   | 1.728E-23    | 205.78 |
| VVSVDISFRPIN(de)ETFPVVYIETPK             | 2748.4738 | IPI0062466€ | IPI0062466€ | yes | yes |       | 3 2.018E-05  | 118.37 |
| VVRPDESEIGERPPEDN(de)QSFQYDHEAFIGK       | 3358.5854 | IPI00137831 | IPI00137831 | yes | yes |       | 3 2.7618E-05 | 85.423 |
| VVMDIPYEIWN(de)ETSAEVADIKK               | 2549.2723 | IPI0011903€ | IPI0011903€ | yes | no  | 2,4   | 2.8268E-06   | 172.81 |
| VVMDIPYEIWN(de)ETSAEVADIK                | 2421.1774 | IPI0011903€ | IPI0011903€ | yes | no  | 2,3   | 5.5208E-28   | 218.72 |
| VVIISGVEPRPPTQVQFTIN(de)ASSEDHKR         | 3200.6942 | IPI0012297€ | IPI0012297€ | yes | no  |       | 3 4.0449E-14 | 151.42 |
| VVIHPN(de)HSVVDIGIHK                     | 1739.0094 | IPI0040914€ | IPI0040914€ | yes | yes | 2,3,4 | 9.6707E-28   | 219.35 |
| VVIGEN(de)ITSNCPEVIYEIKEETPVFYK          | 3169.5893 | IPI0067425€ | IPI0067425€ | yes | yes |       | 3 4.5901E-06 | 113.42 |
| VVIAGSN(de)MTICCMSPTK                    | 1867.8664 | IPI0011929€ | IPI0011929€ | yes | no  |       | 2 7.2615E-20 | 210.39 |
| VVFISPAVPEEPEAYN(de)ITVIIR               | 2455.3363 | IPI0040574€ | IPI0040574€ | yes | no  | 2,3   | 6.2272E-05   | 162.65 |
| VVDGEREN(de)VSMVDYAHNNYQAQSAVPIR         | 3160.4996 | IPI0013474€ | IPI0013474€ | yes | yes |       | 3 1.9844E-05 | 102.21 |
| VVAVSPAN(de)ISREER                       | 1525.8213 | IPI0022999€ | IPI0022999€ | yes | yes |       | 2 0.020367   | 97.69  |
| VTVEGMEYVFYFN(de)DTK                     | 1793.8182 | IPI0040574€ | IPI0040574€ | yes | no  |       | 2 4.2928E-07 | 171.81 |
| VTTCHIPQQN(de)ATIYK                      | 1772.888  | IPI00410951 | IPI00410951 | yes | no  |       | 2 0.024074   | 85.909 |
| VTQIHIISSIEHFQPDQDIIN(de)ISNASIGIHFR     | 3754.9795 | IPI0013556€ | IPI0013556€ | yes | no  |       | 4 1.2555E-09 | 99.536 |
| VTNSNANAAGPIIVAGYN(de)VSGSVR             | 2330.1979 | IPI0022242€ | IPI0022242€ | yes | yes |       | 2 2.3746E-21 | 204.53 |
| VTNIMTGQTAN(de)ATSIIGTMTDAFPK            | 2582.272  | IPI00923031 | IPI00923031 | yes | no  |       | 3 0.016616   | 53.304 |
| VTITFATDESGN(de)HTGWK                    | 1862.8799 | IPI0046706€ | IPI0046706€ | yes | no  |       | 2 3.7402E-06 | 181.51 |

|                                         |           |             |             |     |     |       |               |        |
|-----------------------------------------|-----------|-------------|-------------|-----|-----|-------|---------------|--------|
| VTINNWWAN(de)KTEGR                      | 1600.8322 | IPI00136642 | IPI00136642 | yes | yes | 2,3   | 5.4168E-21    | 207.52 |
| VTIIPN(de)QTHYVVPK                      | 1607.9035 | IPI00742414 | IPI00742414 | yes | no  |       | 2 0.0013149   | 133.16 |
| VTIDFN(de)ITNPENGPVIDDAIPNSVHGHIPFAK    | 3440.7365 | IPI00466371 | IPI00466371 | yes | yes |       | 3 6.4407E-15  | 127.3  |
| VTIDFN(de)ITDPENGPVIDDAIPNSVHGHIPFAK    | 3441.7205 | IPI01026704 | IPI01026704 | yes | yes | 3,4   | 1.3419E-28    | 194.33 |
| VSTVTIVSATSTTAN(de)MTMSPEGR             | 2340.1301 | IPI00406603 | IPI00406603 | yes | yes |       | 2 1.6039E-98  | 273.42 |
| VSTIYANN(de)GSVIQGSTVASVYHKR            | 2550.319  | IPI00121114 | IPI00121114 | yes | yes |       | 3 0.010031    | 72.644 |
| VSTIYANN(de)GSVIQGSTVASVYHK             | 2394.2179 | IPI00121114 | IPI00121114 | yes | yes | 2,3   | 1.0421E-26    | 338.24 |
| VSQVIHEGGHN(de)VTKIYESANIPDFRK          | 3050.5938 | IPI00463764 | IPI00463764 | yes | no  | 3,4   | 0.0002296     | 106.58 |
| VSQVIHEGGHN(de)VTKIYESANIPDFR           | 2922.4988 | IPI00463764 | IPI00463764 | yes | no  |       | 3 9.2514E-09  | 128.12 |
| VSQVIHEGGHN(de)VTK                      | 1503.7794 | IPI00463764 | IPI00463764 | yes | no  | 2,3   | 1.9059E-50    | 240.46 |
| VSNGN(de)GSIEIPATVPGYVHSAIHQHGIIQDPYYR  | 3688.8386 | IPI00118011 | IPI00118011 | yes | no  |       | 4 0.0038814   | 57.156 |
| VSITN(de)VSISDEGR                       | 1375.6943 | IPI00856723 | IPI00856723 | yes | no  |       | 2 1.4006E-65  | 246.64 |
| VSIQEIPEGSEHIEMIAN(de)ATTIAYIKR         | 2883.5164 | IPI00124428 | IPI00124428 | yes | yes |       | 3 0.0036703   | 72.916 |
| VSIQEIPEGSEHIEMIAN(de)ATTIAYIK          | 2727.4153 | IPI00124428 | IPI00124428 | yes | yes | 2,3,4 | 1.2256E-07    | 160.88 |
| VSHVIN(de)DTHMK                         | 1279.6343 | IPI00674258 | IPI00674258 | yes | yes |       | 2 0.016273    | 100.55 |
| VSGQMhMQN(de)ITFQTEASVAQKEFK            | 2995.4168 | IPI00312711 | IPI00312711 | yes | no  |       | 3 0.0001721   | 98.002 |
| VSGQMhMQN(de)ITFQTEASVAQKEK             | 2591.2108 | IPI00312711 | IPI00312711 | yes | no  |       | 3 2.034E-06   | 155.86 |
| VSFYFFVTSPQN(de)VSDVIPR                 | 2201.1157 | IPI00153202 | IPI00153202 | yes | no  | 2,3   | 0.0005698     | 120.66 |
| VSESEKSQIVN(de)ETHWQYYGTSOTR            | 2843.2998 | IPI00749658 | IPI00749658 | yes | no  |       | 3 1.4006E-06  | 173.43 |
| VRIDPPC(de)TNTTAPSNIINPYVR              | 2661.2969 | IPI00658538 | IPI00658538 | yes | no  |       | 3 1.64E-05    | 159.95 |
| VQPIVAVADEGWYIIQN(de)K                  | 2042.0837 | IPI00111163 | IPI00111163 | yes | no  | 2,3   | 2.8254E-08    | 187    |
| VQPIASSTIHSITSVYGTVMN(de)R              | 2687.3953 | IPI00674258 | IPI00674258 | yes | yes |       | 3 0.016384    | 61.616 |
| VQPFN(de)VTK                            | 931.51272 | IPI00222967 | IPI00222967 | yes | no  |       | 2 0.021732    | 134.26 |
| VQGGSSVWGSVITHN(de)SSAITQSWGR           | 2763.3365 | IPI00453977 | IPI00453977 | yes | no  | 3,4   | 1.7884E-06    | 119.34 |
| VPNNAIEGIEN(de)ITAIYIHHNEIQEVGSSMR      | 3347.6568 | IPI00120187 | IPI00120187 | yes | yes | 3,4   | 8.8861E-13    | 132.24 |
| VPMMVQSGN(de)ISYFR                      | 1627.7851 | IPI00116108 | IPI00116108 | yes | yes |       | 2 0.0036745   | 101.75 |
| VNYEGGTWDWIAEAISSN(de)HTR               | 2405.1036 | IPI00134588 | IPI00134588 | yes | yes |       | 3 0.0001152   | 122.01 |
| VNRFN(de)STEYQVVTR                      | 1711.8642 | IPI00119063 | IPI00119063 | yes | no  | 2,3   | 3.6772E-39    | 232.53 |
| VNNVTGN(de)FTFVIR                       | 1479.7834 | IPI00395208 | IPI00395208 | yes | no  |       | 2 0.0010959   | 146.96 |
| VNN(de)VTGNFTFVIR                       | 1479.7834 | IPI00395208 | IPI00395208 | yes | no  |       | 2 0.0010959   | 146.96 |
| VNDSVPFHIGWN(de)STER                    | 1856.8806 | IPI00464258 | IPI00464258 | yes | yes |       | 2 0.0006438   | 140.22 |
| VNDNK(de)TAAEEAIR                       | 1429.7161 | IPI00400018 | IPI00400018 | yes | no  |       | 2 0.0055566   | 116.63 |
| VNCEERNVTGIEN(de)FTIK                   | 2021.984  | IPI00378224 | IPI00378224 | yes | yes |       | 2 4.5809E-05  | 173.03 |
| VNCEERN(de)VTGIENFTIK                   | 2021.984  | IPI00378224 | IPI00378224 | yes | yes |       | 2 4.5809E-05  | 173.03 |
| VNASTTDPN(de)STVEQSAITR                 | 1989.9603 | IPI00338788 | IPI00338788 | yes | no  |       | 2 7.536E-38   | 231.86 |
| VN(de)YTRAEEIFSR                        | 1483.7419 | IPI00131168 | IPI00131168 | yes | yes |       | 2 0.019809    | 98.902 |
| VN(de)SSIHSQISR                         | 1226.6367 | IPI00400018 | IPI00400018 | yes | no  |       | 2 1.6816E-13  | 286.93 |
| VN(de)KTEEDYARDSIFVR                    | 1940.9592 | IPI00133103 | IPI00133103 | yes | no  |       | 2 0.0004276   | 161.04 |
| VN(de)ITYNYPVR                          | 1237.6455 | IPI00221858 | IPI00221858 | yes | yes |       | 2 7.4157E-06  | 176.95 |
| VN(de)ITVIPSITSR                        | 1298.7558 | IPI00323857 | IPI00323857 | yes | no  |       | 2 0.0021966   | 143.25 |
| VN(de)ISFPSAQSIASDTHIK                  | 2011.0375 | IPI00624663 | IPI00624663 | yes | yes | 2,3   | 3.3229E-05    | 175.8  |
| VN(de)ISAPIPKEDPIFTYISKR                | 2400.3417 | IPI00761772 | IPI00761772 | yes | no  |       | 3 0.0077098   | 99.092 |
| VN(de)ISAPIPKEDPIFTYISK                 | 2244.2406 | IPI00761772 | IPI00761772 | yes | no  |       | 3 0.0085202   | 93.226 |
| VN(de)GTKEPIEFK                         | 1260.6714 | IPI00345112 | IPI00345112 | yes | no  |       | 2 7.6285E-17  | 196.88 |
| VN(de)GTITQVIIVGAPTHDDVSK               | 2163.1535 | IPI00225718 | IPI00225718 | yes | yes | 2,3   | 0.0001076     | 129.32 |
| VN(de)GSCVDVDECATGGR                    | 1694.6988 | IPI00170218 | IPI00170218 | yes | no  |       | 2 0.0077762   | 100.77 |
| VN(de)FTIEASEGCYR                       | 1544.6929 | IPI00342158 | IPI00342158 | yes | no  |       | 2 0.0013313   | 134.21 |
| VN(de)DSVPFHIGWNSTER                    | 1856.8806 | IPI00464258 | IPI00464258 | yes | yes |       | 2 0.0006438   | 140.22 |
| VN(de)ASTTDPNSTVEQSAITR                 | 1989.9603 | IPI00338788 | IPI00338788 | yes | no  |       | 2 7.536E-38   | 231.86 |
| VMSWWDYGYQITAMAN(de)R                   | 2090.9343 | IPI00109108 | IPI00109108 | yes | yes | 2,3   | 3.3136E-41    | 216.29 |
| VMSWWDYGYQIAGMAN(de)R                   | 2046.908  | IPI00316468 | IPI00316468 | yes | yes | 2,3   | 8.9049E-20    | 209.66 |
| VMEIEKEIAN(de)ATTKPEDR                  | 2073.0412 | IPI00461861 | IPI00461861 | yes | yes |       | 2 0.012632    | 107.72 |
| VME(de)VNFIYVVMSTAAIPMIKQSNISIAVISSIAGK | 3754.9712 | IPI00115598 | IPI00115598 | yes | no  |       | 4 0.016235    | 43.831 |
| VKPTPPYN(de)ISVTNSEEISSIK               | 2415.2897 | IPI00120158 | IPI00120158 | yes | yes |       | 3 2.6514E-05  | 121.63 |
| VKN(de)STCIDDSWIHPK                     | 1798.8672 | IPI00122584 | IPI00122584 | yes | yes |       | 2 0.0075164   | 110.38 |
| VIYIPAYN(de)CTIRPVSK                    | 1893.0182 | IPI00469387 | IPI00469387 | yes | no  |       | 2 0.010975    | 103.61 |
| VIVIITDGEASDKGN(de)ISAAHDITR            | 2494.3027 | IPI00894972 | IPI00894972 | yes | no  |       | 3 0.0026135   | 87.772 |
| VITNQESPYQN(de)HTGR                     | 1742.8336 | IPI00125318 | IPI00125318 | yes | no  | 2,3   | 6.8101E-79    | 263.56 |
| VITMANQVITVN(de)ISEEGR                  | 1973.0252 | IPI00987268 | IPI00987268 | yes | yes | 2,3   | 4.4106E-19    | 205.78 |
| VITIAN(de)FTTK                          | 1106.6336 | IPI00109727 | IPI00109727 | yes | yes |       | 2 0.0007338   | 164.65 |
| VISNN(de)CTSYGVIDIGK                    | 1738.856  | IPI00331214 | IPI00331214 | yes | yes |       | 2 0.0009735   | 137.81 |
| VISN(de)NCTSYGVIDIGK                    | 1738.856  | IPI00331214 | IPI00331214 | yes | yes |       | 2 0.0009735   | 137.81 |
| VISIAQAHSIN(de)FSCEQVR                  | 2058.0317 | IPI00308998 | IPI00308998 | yes | yes | 2,3   | 0.0001722     | 145.91 |
| VIPSIVNEVIKSVVAKFN(de)ASQIITQR          | 2852.6488 | IPI00321718 | IPI00321718 | yes | no  |       | 3 5.3314E-23  | 174.01 |
| VIPFN(de)VTDYCQIVR                      | 1722.8763 | IPI00828222 | IPI00828222 | yes | no  |       | 2 0.0055272   | 107.61 |
| VINN(de)ITNDIR                          | 1170.6357 | IPI00128178 | IPI00128178 | yes | no  |       | 2 3.5923E-121 | 275.84 |
| VINEECKEN(de)ESINIAAR                   | 1987.9633 | IPI00122411 | IPI00122411 | yes | yes |       | 3 0.0004525   | 144.29 |
| VINDTWAWKN(de)ATIAEQAK                  | 2058.0534 | IPI00123342 | IPI00123342 | yes | yes | 2,3   | 1.1347E-78    | 264.03 |
| VINADQGT SATVQMIIN(de)DTCPFIVR          | 2762.3731 | IPI00320068 | IPI00320068 | yes | yes |       | 3 1.0193E-08  | 127.35 |
| VIN(de)STGHVAR                          | 1167.5996 | IPI00849148 | IPI00849148 | yes | no  |       | 2 0.022901    | 93.623 |
| VIN(de)ITDNTYFK                         | 1326.682  | IPI00130117 | IPI00130117 | yes | yes |       | 2 2.1129E-11  | 185.25 |
| VIN(de)ISHSIIDISSEQIFDGIPAIQHINIQGNHFPK | 3894.0428 | IPI00343568 | IPI00343568 | yes | yes |       | 4 0.0025517   | 57.745 |
| VIN(de)DTWAWKNATIAEQAK                  | 2058.0534 | IPI00123342 | IPI00123342 | yes | yes | 2,3   | 1.1347E-78    | 264.03 |
| VIN(de)DTWAWK                           | 1131.5713 | IPI00123342 | IPI00123342 | yes | yes |       | 2 0.0047021   | 151.22 |
| VIKDAVNN(de)ITAK                        | 1284.7402 | IPI00626793 | IPI00626793 | yes | no  |       | 2 0.0039361   | 143.25 |
| VIIRPYITPNNQGIYIFQGN(de)STVR            | 2762.4868 | IPI00319508 | IPI00319508 | yes | yes | 2,3,4 | 3.0347E-40    | 231.93 |
| VIIQSQPIGTIKHN(de)MTYFCK                | 2490.3127 | IPI00108003 | IPI00108003 | yes | no  |       | 3 0.0018697   | 102.58 |
| VIINFFVGTDDKN(de)STQHIIHFDQPR           | 2940.4882 | IPI00461861 | IPI00461861 | yes | no  |       | 3 0.0003103   | 106.42 |
| VIIN(de)ITTVAAANHGTYK                   | 1713.9414 | IPI00467608 | IPI00467608 | yes | no  |       | 2 9.6934E-20  | 209.6  |
| VIIIDPAISGN(de)ETEPYPAFTR               | 2415.2686 | IPI00848693 | IPI00848693 | yes | yes |       | 2 2.3984E-14  | 197    |
| VIHIQFNSISSITDDTFCAN(de)DTR             | 2781.3392 | IPI00120848 | IPI00120848 | yes | yes |       | 3 0.000104    | 111.66 |
| VIFYKDDAMVYN(de)VTSR                    | 1919.9451 | IPI00406901 | IPI00406901 | yes | no  | 2,3   | 0.0001565     | 157.86 |
| VIETIPANYSIN(de)SSKK                    | 1762.9465 | IPI00480532 | IPI00480532 | yes | no  |       | 2 0.023899    | 93.478 |
| VIETIPAN(de)YSINSSKK                    | 1762.9465 | IPI00480532 | IPI00480532 | yes | no  |       | 2 0.023899    | 93.478 |
| VIENEKFDTHEYHN(de)ESR                   | 2145.9716 | IPI00463492 | IPI00463492 | yes | yes | 2,3   | 5.0475E-19    | 207.92 |
| VIEEPKN(de)VSCETR                       | 1559.7614 | IPI00118291 | IPI00118291 | yes | no  |       | 2 0.0091086   | 109.44 |

|                                             |           |             |             |     |     |       |   |            |        |
|---------------------------------------------|-----------|-------------|-------------|-----|-----|-------|---|------------|--------|
| VIEEFYN(de)QTNWHR                           | 1734.8114 | IPI00308691 | IPI00308691 | yes | no  |       | 2 | 2.4065E-80 | 257.76 |
| VIDPDFHENYFEQYMDHFNESFGN(de)KTFGQR          | 3857.6845 | IPI0033155C | IPI0033155C | yes | yes |       | 4 | 0.0096288  | 59.628 |
| VIDIWDAQSAN(de)FTEKEIESFREEIK               | 3109.5608 | IPI00469307 | IPI00469307 | yes | no  |       | 3 | 0.0011839  | 89.663 |
| VIDIWDAQSAN(de)FTEK                         | 1848.9258 | IPI00469307 | IPI00469307 | yes | no  | 2,3   |   | 0.0001178  | 163.99 |
| VIAQHQNIIIFAN(de)SSSSMR                     | 2002.0054 | IPI0031904C | IPI0031904C | yes | no  | 2,3   |   | 0.004768   | 101.42 |
| VHSGN(de)FSTIPQYFK                          | 1623.8045 | IPI01023131 | IPI01023131 | yes | no  |       | 2 | 0.018613   | 90.444 |
| VHITVCN(de)ITSR                             | 1298.6765 | IPI00128862 | IPI00128862 | yes | no  |       | 2 | 0.004449   | 122.7  |
| VHGPN(de)ASHYTSIMTMITWER                    | 2330.0936 | IPI00169617 | IPI00169617 | yes | yes |       | 3 | 4.5705E-05 | 147.09 |
| VGYQSQN(de)ISCFRR                           | 1604.7406 | IPI0046425E | IPI0046425E | yes | yes |       | 2 | 1.6243E-52 | 236.28 |
| VGVNKN(de)QTVTATFGYPFR                      | 1998.0323 | IPI0011425E | IPI0011425E | yes | no  | 2,3   |   | 9.4205E-62 | 246.12 |
| VGNVECGEGHFCHDN(de)QTCK                     | 2406.9198 | IPI0012464C | IPI0012464C | yes | yes |       | 3 | 0.026701   | 70.334 |
| VGN(de)NTVHVHQEVHK                          | 1596.8121 | IPI00131904 | IPI00131904 | yes | yes |       | 2 | 0.020113   | 89.46  |
| VGDEYQEIQIDGFDN(de)ESSNKTWMK                | 2832.2549 | IPI00114671 | IPI00114671 | yes | no  |       | 3 | 1.7707E-06 | 136.58 |
| VGATAAVYSAAIIEYITAEVIEIAGN(de)ASK           | 2894.5277 | IPI0055505E | IPI0055505E | yes | no  |       | 3 | 2.0608E-89 | 258.31 |
| VGAPEN(de)VTVQAHGHTAFTDITVSVK               | 2593.2772 | IPI0040554E | IPI0040554E | yes | yes |       | 3 | 0.02367    | 58.093 |
| VFVYTPPTN(de)YTIR                           | 1573.814  | IPI0012442E | IPI0012442E | yes | yes |       | 2 | 3.9692E-10 | 181.66 |
| VFPYISVMVNN(de)GSISYDHSKDGR                 | 2584.238  | IPI00321634 | IPI00321634 | yes | yes | 2,3   |   | 9.9123E-06 | 150.68 |
| VFPYISVMVNN(de)GSISYDHSK                    | 2256.0885 | IPI00321634 | IPI00321634 | yes | yes | 2,3   |   | 1.2614E-05 | 180.31 |
| VFPYISAMVNN(de)GSISYDHER                    | 2298.0739 | IPI0083035E | IPI0083035E | yes | no  |       | 2 | 0.0029694  | 98.816 |
| VFNGKDN(de)ISK                              | 1120.5877 | IPI00331214 | IPI00331214 | yes | yes |       | 2 | 1.9321E-05 | 174.4  |
| VFKTN(de)STQVSDVR                           | 1479.7682 | IPI0046942E | IPI0046942E | yes | no  |       | 2 | 0.0041444  | 119.96 |
| VFKPQSGADAIN(de)DSQDFPFPEPAK                | 2705.2973 | IPI0046246E | IPI0046246E | yes | no  |       | 3 | 0.0011846  | 83.31  |
| VFIVPVGN(de)HSNIPFSR                        | 1781.9577 | IPI0022141E | IPI0022141E | yes | no  | 2,3   |   | 8.9441E-05 | 159.18 |
| VFHIHN(de)ESWVIITPK                         | 1818.9781 | IPI00224752 | IPI00224752 | yes | yes |       | 2 | 6.9009E-15 | 199.31 |
| VFGSQN(de)ITTVK                             | 1192.6452 | IPI00123342 | IPI00123342 | yes | yes |       | 2 | 8.371E-57  | 240.85 |
| VFDIHNMGSVN(de)VSVGCTPAQIETSR               | 2958.4328 | IPI0011691E | IPI0011691E | yes | no  |       | 3 | 1.7305E-06 | 117.22 |
| VETGVKPGMVVTFAPVN(de)VTTEVK                 | 2514.3767 | IPI00307837 | IPI00307837 | yes | yes |       | 3 | 0.0087711  | 76.015 |
| VEFDDKGNVITSYGNPIIIN(de)SSIPEDATIK          | 3248.6453 | IPI00122257 | IPI00122257 | yes | no  |       | 3 | 3.5047E-14 | 140.26 |
| VDVIVAN(de)ITVTDKQDQHTPAWNAAYR              | 2893.4723 | IPI00323134 | IPI00323134 | yes | no  |       | 3 | 1.0189E-12 | 189.82 |
| VDIPQQPMGIIAVANDTN(de)SCEISPCR              | 2884.3517 | IPI0011906E | IPI0011906E | yes | yes |       | 3 | 0.0002154  | 102.21 |
| VDIEDFEN(de)NTAYAK                          | 1627.7366 | IPI0055116E | IPI0055116E | yes | no  |       | 2 | 9.3057E-39 | 228.03 |
| VDFIWHPEVN(de)GSMK                          | 1657.7923 | IPI0038029E | IPI0038029E | yes | yes |       | 2 | 0.0084592  | 102.73 |
| VDDEMPQHAVISGPNIFINNINKTDN(de)GTYR          | 3371.6205 | IPI0085672E | IPI0085672E | yes | no  | 3,4   |   | 3.1201E-12 | 161.22 |
| VDDEMPQHAVISGPNIFINNIN(de)KTDNGTYR          | 3371.6205 | IPI0085672E | IPI0085672E | yes | no  | 3,4   |   | 3.1201E-12 | 161.22 |
| VCSNDN(de)KTFDSSCHFFATK                     | 2263.9627 | IPI0012634E | IPI0012634E | yes | no  |       | 3 | 0.0055482  | 100.04 |
| VCNGIG(de)IGEFKDTISINATNIK                  | 2363.2155 | IPI0012119C | IPI0012119C | yes | no  |       | 3 | 0.0055462  | 92.492 |
| VCNG(de)IGIGEFKDTISINATNIK                  | 2363.2155 | IPI0012119C | IPI0012119C | yes | no  |       | 3 | 0.0055462  | 92.492 |
| VAQPGINYAIGTN(de)TSYPNNIIR                  | 2375.2234 | IPI0022636C | IPI0022636C | yes | no  | 2,3   |   | 2.8336E-09 | 177.44 |
| VAEVENGTKPDSDVPEHCIDTWSFDAATMDHN(de)GTMIFFK | 4410.9508 | IPI00128484 | IPI00128484 | yes | yes | 4,5   |   | 1.7298E-10 | 91.115 |
| VAEVEN(de)GTKPDSDVPEHCIDTWSFDAATMDHNGTMIFFK | 4410.9508 | IPI00128484 | IPI00128484 | yes | yes | 4,5   |   | 1.7298E-10 | 91.115 |
| TV(de)VTEAGNIKDNATQEEIIHYIEK                | 2827.4604 | IPI0032119C | IPI0032119C | yes | no  |       | 3 | 7.6664E-06 | 117.38 |
| TSDTGEEEEAITN(de)STEANGK                    | 1952.8447 | IPI0040849E | IPI0040849E | yes | no  |       | 2 | 1.6651E-27 | 218.37 |
| TQITCSIN(de)SSGVDIVGHR                      | 1942.9531 | IPI0040849E | IPI0040849E | yes | no  | 2,3   |   | 0.0003357  | 158.92 |
| TN(de)SSFIQGFVDHVK                          | 1577.7838 | IPI0032119C | IPI0032119C | yes | no  |       | 2 | 0.037605   | 79.771 |
| TIYN(de)WSGYPIIVHK                          | 1689.8879 | IPI00471081 | IPI00471081 | yes | yes |       | 2 | 2.8331E-15 | 199.13 |
| TITIIN(de)VTR                               | 1029.6182 | IPI0010853E | IPI0010853E | yes | no  |       | 2 | 0.0069093  | 140.49 |
| TIIGYYN(de)QSAGGTHTIQWMYGCDVGS DGR          | 3206.4186 | IPI0010999E | IPI0010999E | yes | yes |       | 3 | 4.5278E-06 | 91.722 |
| TIGISPFHEFADVFTAN(de)DSGHR                  | 2516.2084 | IPI0012756C | IPI0012756C | yes | yes |       | 3 | 4.5869E-06 | 127.59 |
| TGRVYN(de)VTQHAMIIVNKQVK                    | 2355.2845 | IPI0046819E | IPI0046819E | yes | no  |       | 3 | 0.0009363  | 108.18 |
| TAASIIWQAYPIIN(de)ISEK                      | 2017.0884 | IPI00115867 | IPI00115867 | yes | yes | 2,3   |   | 1.4387E-49 | 243.01 |
| STIIHHPQYAWIQDIGIRENEG VYN(de)GSWGR         | 3780.8397 | IPI00230084 | IPI00230084 | yes | no  |       | 4 | 1.3996E-19 | 143.25 |
| SN(de)VTRPSEFNWIWIPIPIK                     | 2491.3264 | IPI0031950E | IPI0031950E | yes | no  |       | 3 | 0.0025674  | 100.77 |
| SIIDHIHVGVRDN(de)VSQPK                      | 2070.097  | IPI0012342E | IPI0012342E | yes | no  | 2,3   |   | 0.0022178  | 110.56 |
| SIAQYIHSGPPVYFVIEEGYN(de)YSSR               | 2875.3817 | IPI0013260C | IPI0013260C | yes | no  |       | 3 | 0.0003017  | 90.884 |
| SFIISIAAIHDN(de)HTHSDIQVK                   | 2345.2128 | IPI00130624 | IPI00130624 | yes | yes |       | 3 | 9.708E-05  | 136.34 |
| RYIKNG(de)NATIIR                            | 1417.8154 | IPI0098582E | IPI0098582E | yes | no  | 2,3   |   | 0.0059853  | 136.38 |
| RYIK(de)NGNATIIR                            | 1417.8154 | IPI0098582E | IPI0098582E | yes | no  | 2,3   |   | 0.0059853  | 136.38 |
| RYIEIG(de)NETIIR                            | 1475.8096 | IPI00850057 | IPI00850057 | yes | no  | 2,3   |   | 9.9537E-26 | 212.9  |
| RVNDN(de)KTAAEEAIR                          | 1585.8172 | IPI0040001E | IPI0040001E | yes | no  |       | 2 | 6.2469E-15 | 201.06 |
| RVM(de)EVNFISYVVMSTAAIPMIKQSN GSI AVISSIAGK | 3911.0723 | IPI0011559E | IPI0011559E | yes | no  |       | 4 | 0.0013988  | 57.076 |
| RVIIYPAY(de)NCTIRPVSK                       | 2049.1194 | IPI00469387 | IPI00469387 | yes | no  | 2,3   |   | 0.0002355  | 168.1  |
| RV(de)NYTRAEEIFSR                           | 1639.8431 | IPI0013116E | IPI0013116E | yes | yes |       | 2 | 0.013461   | 115.34 |
| RSN(de)FTPATNEAPQATVFPK                     | 2075.0436 | IPI0017203E | IPI0017203E | yes | no  | 2,3   |   | 0.0015493  | 115.87 |
| RQDVN(de)ITVATVPTWIR                        | 1868.0268 | IPI0022258E | IPI0022258E | yes | yes |       | 2 | 0.0015544  | 138.39 |
| RQDPVSWN(de)KTFEDISR                        | 1976.9704 | IPI0084869E | IPI0084869E | yes | yes | 2,3   |   | 0.0007861  | 145.86 |
| RPYIVPIIWIN(de)ETGTIGDEKAEMFK               | 2919.5205 | IPI00331214 | IPI00331214 | yes | yes |       | 3 | 3.7248E-07 | 155.25 |
| RPYIVPIIWIN(de)ETGTIGDEK                    | 2313.2369 | IPI00331214 | IPI00331214 | yes | yes |       | 3 | 0.000765   | 115.87 |
| RPFVVYEMEVDTIETTCHAI DPTPIAN(de)CSV R       | 3676.7324 | IPI0012824E | IPI0012824E | yes | yes | 3,4   |   | 3.8486E-09 | 96.387 |
| RNPSANTFIHIN(de)ASSFR                       | 1930.9762 | IPI0031553E | IPI0031553E | yes | yes | 2,3   |   | 1.3609E-05 | 179.81 |
| RNESHVVSISTAN(de)FTSPVIEFWER                | 2891.3991 | IPI00314054 | IPI00314054 | yes | yes |       | 3 | 8.0457E-06 | 171.06 |
| RN(de)WTINRINGDFAQINIK                      | 2172.1552 | IPI00323134 | IPI00323134 | yes | no  |       | 3 | 0.0029545  | 138.57 |
| RN(de)FTAADWGHSR                            | 1416.6647 | IPI0033988E | IPI0033988E | yes | no  | 2,3   |   | 0.0022909  | 129.54 |
| RN(de)ESHVVSISTANFTSPVIEFWER                | 2891.3991 | IPI00314054 | IPI00314054 | yes | yes |       | 3 | 8.0457E-06 | 171.06 |
| RMHIN(de)GSNVQVIHR                          | 1659.874  | IPI0011906E | IPI0011906E | yes | yes |       | 3 | 7.3463E-21 | 206.18 |
| RIYAGMVSIMDEAVGN(de)VTK                     | 2053.0336 | IPI0065235E | IPI0065235E | yes | no  |       | 2 | 0.043796   | 64.298 |
| RIPVTN(de)ISQIHK                            | 1404.8201 | IPI0046942E | IPI0046942E | yes | no  |       | 3 | 0.0029409  | 137.84 |
| RIPPTN(de)FTR                               | 1100.6091 | IPI0032061E | IPI0032061E | yes | yes |       | 2 | 0.017449   | 133.13 |
| RIGAI(de)NNSIIIEDR                          | 1695.9632 | IPI0011551E | IPI0011551E | yes | no  |       | 3 | 0.0018791  | 126.63 |
| RIFPSGN(de)VTSVIEISSNPAHR                   | 2280.1975 | IPI0079846E | IPI0079846E | yes | no  |       | 3 | 0.0069567  | 92.897 |
| RHEEGHMIN(de)CTCFGQGR                       | 2087.8836 | IPI0011353E | IPI0011353E | yes | no  | 2,3   |   | 0.012767   | 101.01 |
| RGVFITN(de)ETGQPIIGK                        | 1728.9523 | IPI0011196C | IPI0011196C | yes | no  | 2,3   |   | 0.0001634  | 166.3  |
| RGFTDCAIAN(de)MTQQIR                        | 1981.9462 | IPI00621027 | IPI00621027 | yes | no  | 2,3   |   | 0.0002696  | 156.57 |
| RGPECSQN(de)YTAPTGVIK                       | 1876.9101 | IPI0012399E | IPI0012399E | yes | yes | 2,3   |   | 0.0002738  | 157.58 |
| RGDDIYTN(de)VTVSIVEAIVGFEMDITHIDGHK         | 3443.7031 | IPI00320241 | IPI00320241 | yes | yes | 3,4,5 |   | 4.7885E-14 | 173.36 |
| RGCKDN(de)ATDSVPIR                          | 1587.7787 | IPI0011906E | IPI0011906E | yes | yes |       | 2 | 0.023466   | 106.52 |
| RFHSDIN(de)ISESIIPAVIEK                     | 2167.1637 | IPI00831484 | IPI00831484 | yes | yes |       | 3 | 6.4392E-08 | 186.72 |

|                                          |           |             |             |     |     |     |               |        |
|------------------------------------------|-----------|-------------|-------------|-----|-----|-----|---------------|--------|
| RDQGN(de)VTDMASMK                        | 1451.6497 | IPI00471081 | IPI00471081 | yes | yes | 2,3 | 0.0010871     | 132.79 |
| RDDYRPTWTI(de)NQTEPVAGNYYPVNTN           | 3125.4955 | IPI00381303 | IPI00381303 | yes | yes |     | 3 3.9104E-08  | 160.2  |
| RDDIHPTIPAGQYFI(de)NITYNYPVHVSFDGR       | 3405.6531 | IPI00387318 | IPI00387318 | yes | no  | 3,4 | 8.4627E-12    | 275.54 |
| RAN(de)ASTFAVPSPVNSADTR                  | 2047.0083 | IPI00119065 | IPI00119065 | yes | yes | 2,3 | 0.007435      | 94.845 |
| RAEDYGPVEVISHWHPN(de)ITINIVDDHTPWVK      | 3636.8114 | IPI00121627 | IPI00121627 | yes | yes |     | 4 1.3908E-13  | 101.73 |
| RADIN(de)GSNMETVIGHGK                    | 1910.9632 | IPI00411145 | IPI00411145 | yes | no  |     | 3 0.0046507   | 111.33 |
| QVN(de)GSVSGSQWNK                        | 1389.6637 | IPI0040885C | IPI0040885C | yes | yes |     | 2 0.0031303   | 116.51 |
| QVEIIEYPYHEQIAVVAPEIITGHN(de)YTIK        | 3463.8028 | IPI00223987 | IPI00223987 | yes | yes | 3,4 | 4.8495E-15    | 164.82 |
| QVEEIVN(de)HTGIR                         | 1506.8154 | IPI00263041 | IPI00263041 | yes | yes |     | 2 0.0012981   | 143.94 |
| QVAIQTFGN(de)QTSIIPAGGAGYK               | 2220.1539 | IPI00228719 | IPI00228719 | yes | yes | 2,3 | 9.621E-159    | 299.69 |
| QTTAMDFSAN(de)ETVCWVHVGDSSAAQTQIK        | 3257.4758 | IPI00119063 | IPI00119063 | yes | no  |     | 3 0.0036047   | 65.213 |
| QTQVGIVQYGAN(de)VTHEFNINK                | 2359.1921 | IPI00466371 | IPI01026704 | no  | no  | 2,3 | 4.9216E-13    | 193.85 |
| QSQPVHIIPMN(de)ETDHINMVFSNK              | 2678.2945 | IPI0013350C | IPI0013350C | yes | yes |     | 3 0.025072    | 56.327 |
| QSN(de)GSIIVISSIAGK                      | 1430.7729 | IPI00115599 | IPI00115599 | yes | no  |     | 2 1.6909E-38  | 229.68 |
| QSINTVN(de)DTVWK                         | 1403.7045 | IPI00420867 | IPI00420867 | yes | yes |     | 2 0.0064483   | 105.65 |
| QRYN(de)ITAK                             | 992.54033 | IPI00130661 | IPI00130661 | yes | yes |     | 2 5.3683E-30  | 219.51 |
| QQCIEEAQIEN(de)ETTGCCK                   | 2123.9099 | IPI00128984 | IPI00128984 | yes | yes |     | 2 5.1988E-62  | 246.21 |
| QPIYIN(de)CSCVTGGSASAK                   | 1911.8819 | IPI00309249 | IPI00309249 | yes | yes |     | 2 0.0001746   | 145.43 |
| QNFSN(de)ITVSTEDQVK                      | 1708.8268 | IPI00129677 | IPI00129677 | yes | no  |     | 2 3.043E-260  | 338.8  |
| QN(de)FSNITVSTEDQVK                      | 1708.8268 | IPI00129677 | IPI00129677 | yes | no  |     | 2 3.043E-260  | 338.8  |
| QKNVNISYI(de)VNDSFFPQRPEK                | 2522.2918 | IPI00122557 | IPI00122557 | yes | no  | 2,3 | 0.0002739     | 175.8  |
| QKN(de)VNISYIVNDSFFPQRPEK                | 2522.2918 | IPI00122557 | IPI00122557 | yes | no  | 2,3 | 0.0002739     | 175.8  |
| QINN(de)VSAMIVIAR                        | 1427.7919 | IPI00944049 | IPI00944049 | yes | no  |     | 2 0.0009616   | 130.56 |
| QIN(de)ITTEDDDIYHMTVPYGRPR               | 2633.2544 | IPI00265291 | IPI00265291 | yes | yes |     | 3 0.0077777   | 88.19  |
| QIITEEKIPN(de)NTQWITWSPEGHK              | 2748.3871 | IPI00125813 | IPI00125813 | yes | no  | 2,3 | 8.4295E-52    | 242.59 |
| QIIAN(de)NSIR                            | 1140.6615 | IPI00128024 | IPI00128024 | yes | yes |     | 2 0.014411    | 110.53 |
| QIIAN(de)SSAIEETIIGHQGR                  | 2036.0651 | IPI00116913 | IPI00116913 | yes | no  | 2,3 | 0.0015106     | 131.67 |
| QIGASPSDDIIFGVFAQSKPDSAEPVN(de)R         | 2944.4567 | IPI0013042C | IPI0013042C | yes | no  |     | 4 3.2916E-14  | 129.9  |
| QIFFN(de)GTETIR                          | 1324.6776 | IPI00338209 | IPI00338209 | yes | no  |     | 2 0.014852    | 100.04 |
| QHGQFSIIVGIN(de)ITSIGIR                  | 2109.1695 | IPI0012119C | IPI0012119C | yes | no  |     | 3 0.000263    | 158.64 |
| QGPQAGGTTITIN(de)GTHIDTGSKEDVR           | 2652.3103 | IPI00405742 | IPI00405742 | yes | no  | 2,3 | 6.0153E-06    | 116.43 |
| QGPQAGGTTITIN(de)GTHIDTGSK               | 2153.0713 | IPI00405742 | IPI00405742 | yes | no  | 2,3 | 0.0001909     | 117.48 |
| QGDQYSCMVGHEAIPMN(de)FTQK                | 2440.061  | IPI00968978 | IPI00968978 | yes | no  | 2,3 | 4.8198E-05    | 125.73 |
| QFWIFDVQNPDDVAKN(de)SSK                  | 2237.0753 | IPI00331214 | IPI00331214 | yes | yes | 2,3 | 1.4403E-12    | 197.67 |
| QFNCSFEN(de)ITR                          | 1414.6299 | IPI00674255 | IPI00674255 | yes | yes |     | 2 0.0053084   | 117.79 |
| QFN(de)CSFENITR                          | 1414.6299 | IPI00674255 | IPI00674255 | yes | yes |     | 2 0.0053084   | 117.79 |
| QENNIINAIEHGNSSIFIEN(de)STFESFGYHSVSPDR  | 4064.9141 | IPI00125813 | IPI00125813 | yes | no  |     | 4 0.018637    | 45.685 |
| QENNIINAIEHGN(de)SSIFIENSTFESFGYHSVSPDR  | 4064.9141 | IPI00125813 | IPI00125813 | yes | no  |     | 4 0.018637    | 45.685 |
| QEMNGTYVCHAFSSHGN(de)VTR                 | 2293.9957 | IPI00122973 | IPI00122973 | yes | no  |     | 3 0.014728    | 68.243 |
| QDIAISGN(de)ISSIYAMTQDK                  | 2053.999  | IPI00405742 | IPI00405742 | yes | no  | 2,3 | 2.0348E-19    | 208.37 |
| QAIQTMQSEFFYITNIN(de)DTIEIR              | 2988.4903 | IPI0011813C | IPI0011813C | yes | yes |     | 3 1.2407E-18  | 167.73 |
| PSWGN(de)HTPIFR                          | 1310.652  | IPI00117312 | IPI00117312 | yes | yes |     | 2 3.7829E-11  | 187.85 |
| PINETFPVVYIE(de)TPKR                     | 1902.0251 | IPI00624663 | IPI00624663 | yes | yes | 2,3 | 0.0001097     | 151.56 |
| PINETFPVVYIE(de)TPK                      | 1745.924  | IPI00624663 | IPI00624663 | yes | yes |     | 2 0.031176    | 106.82 |
| PGAASN(de)ISFQAPFR                       | 1461.7365 | IPI00311159 | IPI00311159 | yes | yes |     | 2 1.0425E-10  | 186.56 |
| PFFIIQN(de)SSMMK                         | 1441.7098 | IPI00226229 | IPI00226229 | yes | no  |     | 2 0.018297    | 81.625 |
| NYTAN(de)ATSSREEAWDYVQAQVK               | 2530.1724 | IPI0010809E | IPI0010809E | yes | no  |     | 3 3.8605E-06  | 175.8  |
| NYTAN(de)ATSSREEAWDYVQAQVK               | 2530.1724 | IPI0010809E | IPI0010809E | yes | no  |     | 3 3.8605E-06  | 175.8  |
| NYN(de)FTIACNTR                          | 1500.7143 | IPI00322575 | IPI00322575 | yes | no  |     | 2 0.0026052   | 127.17 |
| NYN(de)FTIACNTR                          | 1344.6132 | IPI00322575 | IPI00322575 | yes | no  |     | 2 0.000637    | 156.36 |
| NYKNPN(de)ITISFTAER                      | 1766.8951 | IPI0013260C | IPI0013260C | yes | no  | 2,3 | 4.9746E-08    | 157.56 |
| NYFHYN(de)QSFPPSYNIK                     | 2017.9323 | IPI00129265 | IPI00129265 | yes | yes |     | 2 7.8109E-48  | 205.98 |
| NYEVQIFHVN(de)ATVTEEGTGIEFSR             | 2739.314  | IPI00123223 | IPI00123223 | yes | yes |     | 3 2.3732E-06  | 124.86 |
| NVVN(de)ITINDEAMVEAVAIYNPVSFAFEVTEDFIMYK | 4166.0268 | IPI00118987 | IPI00118987 | yes | yes |     | 4 1.1042E-10  | 91.603 |
| NVNISYTVN(de)DSFFPQRPKIANK               | 2792.461  | IPI00381178 | IPI00381178 | yes | yes |     | 3 0.0002921   | 111.18 |
| NVNISYTVN(de)DSFFPQRPK                   | 2253.1178 | IPI00381178 | IPI00381178 | yes | yes | 2,3 | 9.7631E-205   | 319.55 |
| NVNISYIVN(de)DSFFPQRPEK                  | 2266.1382 | IPI00122557 | IPI00122557 | yes | no  | 2,3 | 3.2743E-94    | 269.49 |
| NVNI(de)SYTVNDSFFPQRPKIANK               | 2792.461  | IPI00381178 | IPI00381178 | yes | yes |     | 3 0.0002921   | 111.18 |
| NVNI(de)SYTVNDSFFPQRPK                   | 2253.1178 | IPI00381178 | IPI00381178 | yes | yes | 2,3 | 9.7631E-205   | 319.55 |
| NVN(de)ISYIVNDSFFPQRPEK                  | 2266.1382 | IPI00122557 | IPI00122557 | yes | no  | 2,3 | 3.2743E-94    | 269.49 |
| NVAIVAGDTGN(de)ATGIGEQGPTR               | 2097.0451 | IPI00122272 | IPI00122272 | yes | no  |     | 2 6.1857E-98  | 273.33 |
| NTQADVINASWSVISN(de)STRHEIER             | 2726.3372 | IPI00132189 | IPI00132189 | yes | yes |     | 3 2.4378E-06  | 132.74 |
| NTQADVINASWSVISN(de)STR                  | 2062.0079 | IPI00132189 | IPI00132189 | yes | yes | 2,3 | 0             | 370.36 |
| NTQADVIN(de)ASWSVISNSTRHEIER             | 2726.3372 | IPI00132189 | IPI00132189 | yes | yes |     | 3 2.4378E-06  | 132.74 |
| NTQADVIN(de)ASWSVISNSTR                  | 2062.0079 | IPI00132189 | IPI00132189 | yes | yes | 2,3 | 0             | 370.36 |
| NTGEIN(de)ITSIIDREETPYFIITGYAIDSR        | 3300.6514 | IPI00115793 | IPI00115793 | yes | no  |     | 3 6.3269E-14  | 179.33 |
| NSS(de)IGGVINKYDVIR                      | 1732.9472 | IPI00314673 | IPI00314673 | yes | yes |     | 2 0.0001782   | 149.97 |
| NSQFDMN(de)STDIAIK                       | 1582.7297 | IPI00346062 | IPI00346062 | yes | yes |     | 2 0.0001274   | 155.57 |
| NSNSN(de)VIQVDQSGIGIPSRDYINKTENEK        | 3381.6437 | IPI0039684C | IPI0039684C | yes | no  |     | 3 1.5839E-07  | 115.11 |
| NSAEN(de)QTHQTFITVEK                     | 1845.8857 | IPI00458077 | IPI00458077 | yes | yes |     | 2 1.5651E-08  | 183.7  |
| NRCDDN(de)DTIIVR                         | 1488.7103 | IPI0046760C | IPI0046760C | yes | yes |     | 2 0.0019377   | 133.15 |
| NQKDEIN(de)ETDIK                         | 1445.6998 | IPI00930882 | IPI00930882 | yes | no  |     | 2 0.0097888   | 109.15 |
| NQIVEI(de)EKVVHPNHSVVDIGIHK              | 2692.5276 | IPI00409148 | IPI00409148 | yes | yes |     | 3 8.9427E-10  | 186.15 |
| NPSANTFIHINA(de)SSFR                     | 1774.8751 | IPI00315535 | IPI00315535 | yes | yes |     | 2 1.6649E-62  | 250.52 |
| NPNN(de)NTIHPNIR                         | 1402.7066 | IPI00319509 | IPI00319509 | yes | no  |     | 2 5.5191E-34  | 223.31 |
| NPIGQAQSAVVIN(de)VTER                    | 1794.9588 | IPI00119299 | IPI00119299 | yes | no  |     | 2 0.0018319   | 129.43 |
| NPEDVQSPN(de)GSVYTWR                     | 1847.8438 | IPI00112614 | IPI00112614 | yes | yes |     | 2 4.6354E-05  | 170.09 |
| NPCTSEQN(de)CTSPFSYK                     | 1918.7826 | IPI00132474 | IPI00132474 | yes | yes |     | 2 7.9507E-155 | 296.13 |
| NPCNITREDY(de)APIVK                      | 1788.8829 | IPI00307966 | IPI00307966 | yes | yes |     | 2 0.0002748   | 148.52 |
| NNQT(de)ECFNHVR                          | 1417.6157 | IPI00124666 | IPI00124666 | yes | no  |     | 2 0.0010284   | 149.49 |
| NNIHFPGHN(de)YTTR                        | 1569.7437 | IPI00130271 | IPI00130271 | yes | no  |     | 2 0.0023777   | 119.69 |
| NMVIQN(de)GTK                            | 1003.5121 | IPI00127447 | IPI00127447 | yes | yes |     | 2 0.010106    | 135.43 |
| NMICQWDPGRETYIETN(de)YTIK                | 2631.2098 | IPI00120155 | IPI00120155 | yes | yes |     | 3 1.0367E-05  | 180.62 |
| NKNPQMN(de)FTEANEACK                     | 1894.8302 | IPI00308245 | IPI00308245 | yes | yes | 2,3 | 6.5912E-13    | 198.23 |
| NKANIQFGEN(de)GTTISAVTNK                 | 2106.0705 | IPI00127447 | IPI00127447 | yes | yes | 2,3 | 5.8504E-63    | 252.05 |
| NITVIEPVTQPFIVQTN(de)TTVK                | 2341.2893 | IPI00108535 | IPI00108535 | yes | no  |     | 2 2.3893E-29  | 223.46 |

|                                              |           |             |             |     |     |     |   |             |        |
|----------------------------------------------|-----------|-------------|-------------|-----|-----|-----|---|-------------|--------|
| NITAFN(de)ETIFR                              | 1324.6776 | IPI0012470C | IPI0012470C | yes | yes |     | 2 | 4.9182E-44  | 224.66 |
| NISTCFSSGDIFAAHN(de)ISER                     | 2225.0171 | IPI0012342E | IPI0012342E | yes | no  |     | 2 | 3.1105E-19  | 204.47 |
| NISFACNPGFFIN(de)GTSSSK                      | 2046.9469 | IPI0032246C | IPI0032246C | yes | no  |     | 2 | 2.485E-62   | 247    |
| NISFACNPG(de)FFINGTSSSK                      | 2046.9469 | IPI0032246C | IPI0032246C | yes | no  |     | 2 | 2.485E-62   | 247    |
| NIQAVNEIATISQCN(de)DTSSAAMVQCIR              | 3106.4846 | IPI0013834Z | IPI0013834Z | yes | no  |     | 4 | 0.0006064   | 72.935 |
| NIPWYVIAGNHDHIGN(de)VSAQIAYSK                | 2766.3878 | IPI0013749I | IPI0013749I | yes | yes |     | 3 | 0.0015675   | 77.575 |
| NIN(de)SSCRPHPGAWIR                          | 1763.8638 | IPI0022280E | IPI0022280E | yes | no  | 2,3 |   | 0.017012    | 100.22 |
| NIMTIVHFYN(de)K                              | 1378.7067 | IPI0011982Z | IPI0011982Z | yes | no  |     | 2 | 0.0040741   | 127.87 |
| NIMIDIQKDTAV(de)EGEEIEVNCTAMASKPATTIR        | 3647.7845 | IPI0085672C | IPI0085672C | yes | no  |     | 4 | 1.3358E-11  | 118.9  |
| NIKRPYIVPII(de)WINETGTIGDEK                  | 2668.4588 | IPI00331214 | IPI00331214 | yes | yes |     | 3 | 1.4778E-09  | 157.85 |
| NIIYHNIGIITKPGTIPTDRN(de)SSMCTVMR            | 3414.7574 | IPI0046349Z | IPI0046349Z | yes | yes |     | 4 | 8.5522E-06  | 84.68  |
| NIINDYVSN(de)QTQGMKEIISEIDER                 | 2921.4441 | IPI0013183C | IPI0013183C | yes | no  | 3,4 |   | 2.4334E-09  | 180.13 |
| NIINDYVSN(de)QTQGMK                          | 1836.904  | IPI0013183C | IPI0013183C | yes | no  | 2,3 |   | 2.1565E-15E | 304.23 |
| NIIGIDENFVIN(de)SSTEHR                       | 2057.0178 | IPI0040660C | IPI0040660C | yes | yes | 2,3 |   | 0.000155    | 149.52 |
| NIGN(de)TSEGPR                               | 1043.4996 | IPI0022170E | IPI0022170E | yes | yes |     | 2 | 0.0018523   | 152.54 |
| NIGGIETEDDYGYQGHVQTCN(de)FSAQMAK             | 3132.3553 | IPI0012676E | IPI0012676E | yes | yes |     | 3 | 1.8821E-11  | 142.79 |
| NIFIN(de)HSETASAK                            | 1430.7154 | IPI0040914E | IPI0040914E | yes | yes | 2,3 |   | 7.2418E-98  | 273.72 |
| NHNGQGYKDQDPASFGNNSIIN(de)SSR                | 2832.3175 | IPI0084869C | IPI0084869C | yes | yes |     | 3 | 1.39E-05    | 114.92 |
| NHNGQGYKDQDPASFGN(de)NSIINSSR                | 2832.3175 | IPI0084869C | IPI0084869C | yes | yes |     | 3 | 1.39E-05    | 114.92 |
| NHAVSFDFIFSAVKN(de)FSEAASDFHR                | 2792.3307 | IPI0011304Z | IPI0011304Z | yes | no  | 3,4 |   | 3.9947E-17  | 194.77 |
| NGNATI(de)IR                                 | 857.47191 | IPI0098582E | IPI0098582E | no  | no  |     | 2 | 0.014287    | 144.12 |
| NGNATI(de)IR                                 | 857.47191 | IPI0098582E | IPI0098582E | no  | no  |     | 2 | 0.014287    | 144.12 |
| NGNA(de)TIIR                                 | 857.47191 | IPI0098582E | IPI0098582E | no  | no  |     | 2 | 0.014287    | 144.12 |
| NGNA(de)TIIR                                 | 857.47191 | IPI0098582E | IPI0098582E | no  | no  |     | 2 | 0.014287    | 144.12 |
| NGIASGSGN(de)CSTGPNGDGSFHAWSIIEVK            | 2918.3253 | IPI00322497 | IPI00322497 | yes | yes |     | 3 | 0.011282    | 60.86  |
| NGHITN(de)YTVVYR                             | 1435.7208 | IPI00110264 | IPI00110264 | yes | yes |     | 2 | 2.5942E-14  | 189.24 |
| NF(de)TAADWGHSR                              | 1260.5636 | IPI0033988E | IPI0033988E | yes | no  |     | 2 | 0.0020817   | 137.16 |
| NF(de)NVEKINGEWHTIIASDKR                     | 2483.2921 | IPI0094471E | IPI0094471E | no  | no  |     | 3 | 5.4531E-19  | 204.94 |
| NEVN(de)GTSEDIKSEVQRK                        | 1931.9548 | IPI0012241E | IPI0012241E | yes | no  |     | 2 | 0.015437    | 109.07 |
| NEKPRPAVN(de)VTCAR                           | 1610.8311 | IPI0094468C | IPI0094468C | yes | yes |     | 3 | 0.033205    | 101.32 |
| NEIMIN(de)SSIMR                              | 1306.6373 | IPI0037869E | IPI0037869E | yes | no  |     | 2 | 0.0007552   | 140.14 |
| NEEVKN(de)MSVEINSKIESIIEEK                   | 2561.2894 | IPI0012820E | IPI0012820E | yes | yes |     | 3 | 5.4392E-05  | 147.25 |
| NEEVKN(de)MSVEINSK                           | 1619.7825 | IPI0012820E | IPI0012820E | yes | yes |     | 2 | 0.0027995   | 128.71 |
| NEDRPIAPCGAIANSFMNDTIEIYIVAN(de)ESDPKPIPIPIK | 4422.224  | IPI0038731E | IPI0038731E | yes | no  |     | 4 | 0.0017113   | 52.377 |
| NEDRPIAPCGAIANSFMN(de)DTIEIYIVANESDPKPIPIPIK | 4422.224  | IPI0038731E | IPI0038731E | yes | no  |     | 4 | 0.0017113   | 52.377 |
| NAVN(de)CTYKNEDDCVVR                         | 1955.8466 | IPI00266264 | IPI00266264 | yes | yes | 2,3 |   | 0.0001247   | 168.1  |
| NATIAEQAKI(de)PATEKPVIIISK                   | 2221.2682 | IPI0012334Z | IPI0012334Z | yes | yes | 2,3 |   | 0.0004111   | 168.05 |
| NAKGDEKEN(de)ITAEIDISIK                      | 2158.1117 | IPI0012472E | IPI0012472E | yes | no  | 2,3 |   | 8.2716E-37  | 224.59 |
| NAIQAFGN(de)GTDVNMSPK                        | 1762.8308 | IPI0011635E | IPI0011635E | yes | no  |     | 2 | 6.3295E-05  | 171.78 |
| NAIN(de)ITFHAQNIPEGGAYEAEIR                  | 2487.2142 | IPI0011597E | IPI0011597E | yes | yes |     | 3 | 2.3728E-51  | 237.24 |
| NACCSVN(de)TSQEIHK                           | 1646.7141 | IPI0011315E | IPI0011315E | yes | yes |     | 2 | 0.012759    | 95.981 |
| N(de)YTDCTSEGR                               | 1201.467  | IPI0011353E | IPI0011353E | yes | no  |     | 2 | 0.010676    | 118.28 |
| N(de)YSIFIADINQER                            | 1581.7787 | IPI0033131E | IPI0033131E | yes | no  |     | 2 | 5.9377E-06  | 165.86 |
| N(de)VTYGTIYIDDPDPPDDGFNYK                   | 2307.9808 | IPI0039995E | IPI0039995E | yes | no  |     | 2 | 3.0119E-157 | 304.09 |
| N(de)VTIECPFKR                               | 1262.6441 | IPI0031005E | IPI0031005E | yes | no  |     | 2 | 7.9364E-42  | 227.88 |
| N(de)VSCIWCNENK                              | 1422.602  | IPI0037764Z | IPI0037764Z | yes | no  |     | 2 | 0.0021936   | 136.38 |
| N(de)TTSYPPMCSQDAVGGQVISEIFTNRK              | 2999.4117 | IPI0038728E | IPI0038728E | yes | yes |     | 3 | 0.0008156   | 78.272 |
| N(de)TTSYPPMCSQDAVGGQVISEIFTNR               | 2871.3167 | IPI0038728E | IPI0038728E | yes | yes |     | 3 | 0.011992    | 63.883 |
| N(de)TTSAAMVHCIR                             | 1359.6387 | IPI0013121E | IPI0013121E | yes | yes |     | 2 | 0.0021394   | 122.33 |
| N(de)TTIYIDRAEAK                             | 1393.7201 | IPI0046853E | IPI0046853E | yes | no  |     | 2 | 0.011404    | 105.95 |
| N(de)TTISVHPSTR                              | 1211.6258 | IPI00126834 | IPI00126834 | yes | no  |     | 2 | 0.005201    | 117.2  |
| N(de)TTHIQR                                  | 981.53558 | IPI0032122Z | IPI0032122Z | yes | yes |     | 2 | 0.037975    | 104.2  |
| N(de)STTIVMHMK                               | 1160.5682 | IPI0011906C | IPI0011906C | yes | yes |     | 2 | 0.0016259   | 136.96 |
| N(de)STKEEIIAAIEK                            | 1444.7773 | IPI0032119C | IPI0032119C | yes | no  |     | 2 | 1.3928E-13  | 185.27 |
| N(de)STIQAANIAGIK                            | 1299.7147 | IPI00222937 | IPI00222937 | yes | no  |     | 2 | 0.0005135   | 154.1  |
| N(de)SSNFHINQIQGIR                           | 1626.8227 | IPI0032323E | IPI0032323E | yes | yes |     | 2 | 0.0009665   | 139.48 |
| N(de)RTDVEYEIDEK                             | 1509.6947 | IPI0013474C | IPI0013474C | yes | yes |     | 2 | 0.0029528   | 124.45 |
| N(de)QTIEIHVIYGPR                            | 1538.8205 | IPI0012297C | IPI0012297C | yes | no  |     | 2 | 3.0456E-53  | 242.48 |
| N(de)QSVGDPNVDIIR                            | 1425.7212 | IPI00127447 | IPI00127447 | yes | yes |     | 2 | 5.031E-14   | 188.13 |
| N(de)ITVIEPVTQPFIQVTNTTVK                    | 2341.2893 | IPI0010853E | IPI0010853E | yes | no  |     | 2 | 2.3893E-29  | 223.46 |
| N(de)ITSPVGVQPIINEHTFCAGITK                  | 2495.2842 | IPI0040914E | IPI0040914E | yes | yes | 2,3 |   | 1.3463E-06  | 175.86 |
| N(de)ITMFISR                                 | 980.51134 | IPI0022571E | IPI0022571E | yes | yes |     | 2 | 0.031589    | 111.61 |
| N(de)ITFQGPPIK                               | 1113.6182 | IPI00111794 | IPI00111794 | yes | no  |     | 2 | 0.0089509   | 123.51 |
| N(de)ISVVVATHSPTIAK                          | 1535.8671 | IPI0022141E | IPI0022141E | yes | no  |     | 2 | 1.4782E-14  | 194.55 |
| N(de)ISTCFSSGDIFAAHNISER                     | 2225.0171 | IPI0012342E | IPI0012342E | yes | no  |     | 2 | 3.1105E-19  | 204.47 |
| N(de)ISGVVIADHSGSFHNR                        | 1808.8918 | IPI00118674 | IPI00118674 | yes | yes |     | 2 | 7.0548E-05  | 153.75 |
| N(de)HSIPIETK                                | 1037.5506 | IPI00129041 | IPI00129041 | yes | no  |     | 2 | 0.0037005   | 162.88 |
| N(de)ETHSICSACDESCK                          | 1796.6764 | IPI0011128E | IPI0011128E | yes | yes |     | 2 | 0.001086    | 128.71 |
| N(de)CSTQHFPFR                               | 1145.5036 | IPI00322304 | IPI00322304 | yes | yes |     | 2 | 0.017048    | 122.26 |
| N(de)ATYGHYEPGEEFHVEDAETYKK                  | 2828.2202 | IPI0022179E | IPI0022179E | yes | no  |     | 3 | 1.6789E-06  | 148.75 |
| N(de)ATVVWMKDNIR                             | 1445.7449 | IPI0012137E | IPI0012137E | yes | no  |     | 2 | 0.014264    | 103.88 |
| N(de)ATVVWMK                                 | 947.48987 | IPI0012137E | IPI0012137E | yes | no  |     | 2 | 0.012987    | 147.19 |
| N(de)ATTYPPMCSQDAAR                          | 1681.7188 | IPI0012839E | IPI0012839E | yes | yes |     | 2 | 4.1098E-08  | 181.26 |
| N(de)ATSYPPMCSQDAGWAK                        | 1882.7978 | IPI0013834Z | IPI0013834Z | yes | yes |     | 2 | 0.0001784   | 148.52 |
| N(de)ATIVNEADKIR                             | 1342.7205 | IPI0031950E | IPI0031950E | yes | no  |     | 2 | 2.0685E-05  | 168.31 |
| N(de)ATFSIANPVYVGNAAWAHIIAAR                 | 2526.3132 | IPI0097128E | IPI0097128E | yes | no  |     | 3 | 0.030765    | 67.227 |
| N(de)ASSEYSGTYSCTVQNR                        | 1922.8065 | IPI0027037E | IPI0027037E | yes | no  |     | 2 | 5.3731E-77  | 258.14 |
| MYVTN(de)DTEVAENNYEAIKDFFR                   | 2668.2115 | IPI0065853E | IPI0065853E | yes | no  | 2,3 |   | 3.2069E-09  | 183.56 |
| MYSEGSDIVPQSN(de)ETAIHYFKK                   | 2543.2002 | IPI0013114C | IPI0013114C | yes | no  | 2,3 |   | 4.4945E-05  | 157.54 |
| MYSEGSDIVPQSN(de)ETAIHYFK                    | 2415.1053 | IPI0013114C | IPI0013114C | yes | no  | 2,3 |   | 0.0001959   | 159.19 |
| MVN(de)TTFICTATNAVGTGR                       | 1912.9135 | IPI0010937E | IPI0010937E | yes | no  | 2,3 |   | 0           | 330.54 |
| MVN(de)HSIHPTPEVK                            | 1487.7555 | IPI00750217 | IPI00750217 | yes | no  | 2,3 |   | 0.0015286   | 134.68 |
| MTYFVCTQIKVVRN(de)NSQVPK                     | 2411.2454 | IPI00988381 | IPI00988381 | yes | yes |     | 3 | 0.033612    | 73.208 |
| MTQIIGITPN(de)ATHIHRPPR                      | 2152.1688 | IPI0013032E | IPI0013032E | yes | yes |     | 3 | 0.0098144   | 96.489 |
| MTISQN(de)NSIIR                              | 1275.6605 | IPI0010853E | IPI0010853E | no  | no  |     | 2 | 7.4578E-85  | 257.8  |
| MSVINFEKN(de)KTAGK                           | 1597.7592 | IPI00308971 | IPI00308971 | yes | yes |     | 2 | 0.0001402   | 158.52 |



|                                                |           |             |             |     |     |       |             |        |
|------------------------------------------------|-----------|-------------|-------------|-----|-----|-------|-------------|--------|
| MSVINFECDN(de)K                                | 1240.558  | IPI00308971 | IPI00308971 | yes | yes | 2     | 0.036661    | 94.465 |
| MSQHPIQEDFNATIVN(de)ASSIIPK                    | 2881.428  | IPI00762812 | IPI00762812 | yes | yes | 3     | 0.0055751   | 65.425 |
| MRSQGAQDN(de)VSVSQGM                           | 1818.8465 | IPI0034858E | IPI0034858E | yes | no  | 3     | 8.8992E-14  | 202.63 |
| MQVVSND(de)GTVTTAIWR                           | 1661.8559 | IPI0033117E | IPI0033117E | yes | no  | 2     | 5.7464E-06  | 161.24 |
| MQDTIEHHVNSDTSAPSTIEYGNR                       | 2913.3563 | IPI0012095E | IPI0012095E | yes | yes | 3     | 1.434E-07   | 122.3  |
| MQDTIEHHVND(de)VSAPSTIEYGNR                    | 2913.3563 | IPI0012095E | IPI0012095E | yes | yes | 3     | 1.434E-07   | 122.3  |
| MPSQASAGNVYPQPIIN(de)SSMCIEDSR                 | 2851.2939 | IPI0022475E | IPI0022475E | yes | yes | 3     | 3.3238E-10  | 138.44 |
| MPPFDQDFYVSPTFQDIIN(de)R                       | 2542.2202 | IPI0031817E | IPI0031817E | yes | yes | 3     | 0.0004657   | 110.56 |
| MNPDIDTGHN(de)TSAPAHWGEIK                      | 2290.0437 | IPI0031442E | IPI0031442E | yes | no  | 3     | 0.0026099   | 89.261 |
| MN(de)RSIQIISTPWIGAYIK                         | 2090.1347 | IPI0011553E | IPI0011553E | yes | yes | 2     | 0.01302     | 89.358 |
| MN(de)MSVITIQEYEFEK                            | 1860.8638 | IPI0046143E | IPI0046143E | yes | yes | 2     | 7.9681E-06  | 154.51 |
| MIVSNIDIGPTIIDIAGYDIN(de)KTQMDGMSIPIIK         | 3801.997  | IPI0022142E | IPI0022142E | yes | yes | 4     | 0.0031694   | 54.003 |
| MITNEKIDAYNEAAVSIIN(de)SSSTR                   | 2539.2588 | IPI0038029E | IPI0038029E | yes | yes | 3     | 0.017437    | 74.048 |
| MIHN(de)TTGVYTCSAHGTWTNEVIK                    | 2775.3221 | IPI0047520E | IPI0047520E | yes | no  | 3     | 4.0631E-07  | 180.8  |
| MIEN(de)GSISFIPTIR                             | 1576.8283 | IPI00123194 | IPI00123194 | yes | yes | 2,3   | 1.1314E-15E | 300.51 |
| MIEAYN(de)ITEK                                 | 1210.5904 | IPI0012143C | IPI0012143C | yes | no  | 2     | 0.011285    | 120.96 |
| MHING(de)SNVQVIHR                              | 1503.7729 | IPI0011906E | IPI0011906E | yes | yes | 2,3   | 3.9536E-06  | 168.31 |
| MGDREAIGN(de)ASQIFDSWIKGSASIPVNIR              | 3131.5822 | IPI0013458E | IPI0013458E | yes | yes | 3     | 0.0048378   | 68.361 |
| MGDREAIGN(de)ASQIFDSWIK                        | 2137.0262 | IPI0013458E | IPI0013458E | yes | yes | 2,3   | 0.0002228   | 144.97 |
| MFSQN(de)DTR                                   | 997.42873 | IPI0012925C | IPI0012925C | yes | yes | 2     | 0.027424    | 128.36 |
| MEISVGAIQAN(de)R                               | 1287.6605 | IPI00108811 | IPI00108811 | yes | yes | 2     | 0.0024106   | 144.57 |
| MEAHNVSAFND(de)FSIPPGFGHR                      | 2311.0957 | IPI0011548E | IPI0011548E | yes | no  | 2,3,4 | 1.0186E-39  | 233.59 |
| MEAHN(de)VSAPFNSIPPGFGHR                       | 2311.0957 | IPI0011548E | IPI0011548E | yes | no  | 2,3,4 | 1.0186E-39  | 233.59 |
| MEAEN(de)HTAIVHFIIIGISEDPK                     | 2463.2468 | IPI0012537C | IPI0012537C | yes | yes | 3     | 0.028866    | 56.036 |
| MDYNSFQGTSPN(de)ETK                            | 1717.7254 | IPI00876541 | IPI00876541 | yes | no  | 2     | 0.0045752   | 110.84 |
| MDTSMN(de)FSR                                  | 1087.4427 | IPI0013621C | IPI0013621C | yes | yes | 2     | 2.7785E-42  | 232.41 |
| MDIRP(de)NHTIYINNMNDKIK                        | 2329.1671 | IPI0013257E | IPI0013257E | yes | no  | 2,3   | 0.0020735   | 105.39 |
| MDGHCAPIRTEAGVFEYVADPTFEN(de)FTGGVKK           | 3542.6599 | IPI0040574E | IPI0040574E | yes | no  | 4     | 0.0002239   | 78.3   |
| MDGHCAPIRTEAGVFEYVADPTFEN(de)FTGGVK            | 3414.5649 | IPI0040574E | IPI0040574E | yes | no  | 3,4   | 1.8522E-06  | 100.23 |
| MDFIIFN(de)YSAPSIR                             | 1835.8916 | IPI0055350E | IPI0055350E | yes | yes | 2     | 0.0014052   | 121.79 |
| MATPIIMRPMMDNMIIGPVKN(de)VTK                   | 2787.4342 | IPI0011589E | IPI0011589E | yes | no  | 3     | 0.0024096   | 94.259 |
| MAIIQYGSQNNQVAFPIYND(de)VTTIHEAIER             | 3562.7879 | IPI00621027 | IPI00621027 | yes | yes | 4     | 3.4617E-07  | 109.26 |
| MAAAINATGRPIAFSCSWPAYEGGIPPKVN(de)YTEVSR       | 3880.9029 | IPI0031559E | IPI0031559E | yes | no  | 4     | 3.871E-14   | 103.27 |
| MAAAIN(de)ATGRPIAFSCSWPAYEGGIPPKVNYTEVSR       | 3880.9029 | IPI0031559E | IPI0031559E | yes | no  | 4     | 3.871E-14   | 103.27 |
| KYQTI(de)NCSVNV                                | 1480.7456 | IPI0042083E | IPI0042083E | yes | no  | 2     | 0.0022909   | 129.54 |
| KYHDYITSTS(de)NGSIEGIENR                       | 2446.1401 | IPI00130754 | IPI00130754 | yes | yes | 3     | 9.1285E-29  | 223.18 |
| KYFDQVDIS(de)NGIDWSIDHK                        | 2279.0859 | IPI0013345E | IPI0013345E | yes | yes | 3     | 1.1089E-39  | 233.79 |
| KYEQAK(de)NISQDIEK                             | 1692.8683 | IPI0040001E | IPI0040001E | yes | no  | 2     | 9.4728E-29  | 220.27 |
| KWPERISAI(de)DNIINHSSIFIK                      | 2480.354  | IPI0012334E | IPI0012334E | yes | yes | 3     | 2.3853E-05  | 180.1  |
| KWGH(de)NVTEFQQR                               | 1528.7535 | IPI0075438E | IPI0075438E | yes | yes | 2     | 0.0018282   | 156.36 |
| KVYEEVIN(de)VTPNDGFAK                          | 1921.9785 | IPI0062489E | IPI0062489E | yes | no  | 2     | 0.0025898   | 133.94 |
| KVPSN(de)STETVIESDQFQPGVR                      | 2317.155  | IPI0011929E | IPI0011929E | yes | no  | 2,3   | 0.0001923   | 122.49 |
| KVIVAPPSEEAN(de)TTK                            | 1582.8566 | IPI00470184 | IPI00470184 | yes | no  | 2     | 0.02631     | 94.007 |
| KVIIN(de)NSIDEPR                               | 1396.7674 | IPI0041114E | IPI0041114E | yes | no  | 2     | 0.016799    | 100.55 |
| KVEVEPIN(de)STAVHVSWK                          | 1922.0262 | IPI00110264 | IPI00110264 | yes | yes | 2,3   | 5.0981E-27  | 217.35 |
| KVEVEAVN(de)ATAVK                              | 1356.7613 | IPI0060806E | IPI0060806E | yes | no  | 2     | 9.0746E-14  | 188.12 |
| KVEAEAIN(de)ATAIR                              | 1384.7674 | IPI0075485E | IPI0075485E | yes | no  | 2     | 0.0064349   | 114.64 |
| KVDN(de)ASIVADDMR                              | 1432.698  | IPI0035646E | IPI0035646E | yes | no  | 2     | 0.0090035   | 111.64 |
| KTYAVYDIFDTAMIN(de)NSR                         | 2121.0201 | IPI0022679C | IPI0022679C | yes | no  | 2,3   | 3.2572E-19  | 210.39 |
| KTTIEN(de)FTCPPEYK                             | 1629.7709 | IPI0042081C | IPI0042081C | yes | yes | 2     | 0.011752    | 105.03 |
| KTN(de)QSCEIVIDSTEKNVPSYIGR                    | 2637.3068 | IPI0031005E | IPI0031005E | yes | no  | 3     | 3.2693E-05  | 147.67 |
| KTN(de)QSCEIVIDSTEK                            | 1750.8407 | IPI0031005E | IPI0031005E | yes | no  | 2     | 3.7254E-21  | 211.9  |
| KTMFN(de)STEIK                                 | 1197.6064 | IPI0067739E | IPI0067739E | yes | no  | 2     | 0.017917    | 124.12 |
| KTISSSN(de)NTITGFIIGFPCPR                      | 2422.2679 | IPI00126424 | IPI00126424 | yes | yes | 3     | 0.024697    | 66.893 |
| KTGVHDGDFEYN(de)ITTTIAAINK                     | 2407.202  | IPI0010884E | IPI0010884E | yes | no  | 3     | 3.9869E-06  | 170.61 |
| KTGEAN(de)ITQIYTQEAIDFIQTQHAR                  | 2875.4464 | IPI0031009C | IPI0031009C | yes | no  | 3,4   | 1.0187E-42  | 228.31 |
| KTCNPETFPIRN(de)ESIQCPTAR                      | 2518.2057 | IPI0064918E | IPI0064918E | yes | no  | 3     | 0.011002    | 96.391 |
| KSPGYVIDIIVTPQN(de)K                           | 1770.988  | IPI0010994E | IPI0010994E | yes | yes | 2     | 0.0003011   | 147.17 |
| KSDTQNIIN(de)VSTGR                             | 1694.8588 | IPI01023214 | IPI01023214 | yes | no  | 2     | 0.0053253   | 113.88 |
| KSCHTAVGTSEGWNVPMGIIN(de)QTGSCK                | 3081.4107 | IPI0047108C | IPI0047108C | yes | no  | 3     | 5.9904E-10  | 123.44 |
| KQVTPIFFYFQN(de)R                              | 1686.8882 | IPI0031950E | IPI0031950E | yes | no  | 2,3   | 0.0067135   | 113.99 |
| KPNN(de)ISDTVK                                 | 1114.5982 | IPI0010884E | IPI0010884E | yes | yes | 2     | 0.01612     | 123.51 |
| KPISQFEAYVN(de)ASGEHGIVVFSIGSMVSEIPEKK         | 3805.9237 | IPI00134691 | IPI00134691 | yes | no  | 4     | 2.0233E-09  | 93.384 |
| KPIIGHYKPDIAVVIEN(de)GTSIDR                    | 2635.4334 | IPI0041079E | IPI0041079E | yes | no  | 3     | 1.2841E-06  | 179.19 |
| KNVNISYTV(de)NDSFFPQRPQK                       | 2381.2128 | IPI0038117E | IPI0038117E | yes | yes | 2,3,4 | 0           | 390.4  |
| KNVN(de)ISYTVNDSFFPQRPQK                       | 2381.2128 | IPI0038117E | IPI0038117E | yes | yes | 2,3,4 | 0           | 390.4  |
| KN(de)ITDIVEGAKK                               | 1314.7507 | IPI0064918E | IPI0064918E | yes | no  | 2     | 0.019378    | 111.12 |
| KN(de)ISEIWDAYCYR                              | 1716.793  | IPI0098726E | IPI0098726E | yes | no  | 2     | 7.0166E-18  | 196.33 |
| KMVIWN(de)DSTIR                                | 1361.7126 | IPI0013597E | IPI0013597E | yes | yes | 2     | 0.025851    | 101.89 |
| KMISAFN(de)ATSGK                               | 1253.6438 | IPI0046699E | IPI0046699E | yes | no  | 2     | 0.0033897   | 124.51 |
| KKENGVFEEISN(de)SSGR                           | 1779.8751 | IPI00757771 | IPI00757771 | yes | no  | 2,3   | 4.5825E-27  | 218.66 |
| KITDVETQVIN(de)QTSR                            | 1730.9163 | IPI0011435C | IPI0011435C | yes | yes | 2     | 2.4621E-06  | 164.93 |
| KITAN(de)STWQPDKAK                             | 1586.8417 | IPI0065367E | IPI0065367E | yes | no  | 2     | 2.9596E-06  | 182.02 |
| KISTN(de)ITIVCKPGDIESAPVIR                     | 2410.3254 | IPI00308971 | IPI00308971 | yes | yes | 3     | 0.0001559   | 116.73 |
| KINIDGSN(de)YTIK                               | 1477.814  | IPI0011906E | IPI0011906E | yes | yes | 2     | 1.1793E-31  | 216.88 |
| KINASIVTSFVEIIVSN(de)VSIR                      | 2385.3631 | IPI00323857 | IPI00323857 | yes | no  | 2,3   | 1.3972E-05  | 127.17 |
| KIN(de)YTIK                                    | 878.52255 | IPI0031950E | IPI0031950E | yes | yes | 2     | 3.9411E-09  | 183.26 |
| KIN(de)CSQEQVPGSSQCDREPEPR                     | 2600.1707 | IPI0022291E | IPI0022291E | yes | yes | 3     | 0.021078    | 81.723 |
| KIN(de)ASIVTSFVEIIVSN(de)VSIR                  | 2385.3631 | IPI00323857 | IPI00323857 | yes | no  | 2,3   | 1.3972E-05  | 127.17 |
| KIIASPNEEN(de)MTEIISMR                         | 2075.0391 | IPI0032257E | IPI0032257E | yes | no  | 2,3   | 4.8038E-06  | 181.51 |
| KIDFIVIN(de)ETR                                | 1346.7558 | IPI0012581E | IPI0012581E | yes | no  | 2,3   | 1.1427E-11  | 190.85 |
| KHYQVTGYGIN(de)GTGDSNDFWR                      | 2414.104  | IPI0022166E | IPI0022166E | yes | no  | 3     | 4.5898E-06  | 181.94 |
| KGN(de)NTINPFIIIPSASDVPTGCPNQWWPYAGHCYR        | 3916.8202 | IPI0012618E | IPI0012618E | yes | yes | 4     | 0.0019093   | 61.526 |
| KGIVSGGVYNSHVGCIPYTIPPCHEHV(de)NGSRPPCTGEGDTPF | 4558.1329 | IPI00113517 | IPI00113517 | yes | yes | 4     | 8.808E-06   | 64.221 |
| KGFCEADN(de)STVSENPNPEDWPNTEGCMK               | 3343.3704 | IPI0010809E | IPI0010809E | yes | yes | 3     | 4.665E-11   | 123.44 |
| KGCADYCN(de)QTITK                              | 1557.6916 | IPI0098726E | IPI0098726E | yes | no  | 2     | 1.3433E-05  | 163.99 |

|                                                |           |             |             |     |     |     |               |        |
|------------------------------------------------|-----------|-------------|-------------|-----|-----|-----|---------------|--------|
| KFPVPFQKEN(de)VTATIVEIGR                       | 2272.258  | IPI00134691 | IPI00134691 | yes | yes | 2,3 | 1.0157E-18    | 205.78 |
| KFN(de)STQIAAMAPEHEEPR                         | 2054.9844 | IPI00856861 | IPI00856861 | yes | no  |     | 3 0.0006009   | 157.58 |
| KFHVN(de)YTQPIVAVK                             | 1642.9195 | IPI00123704 | IPI00123704 | yes | no  |     | 2 9.3621E-07  | 170.95 |
| KFEAENISN(de)YTAIISQDGK                        | 2240.1325 | IPI0046413E | IPI0046413E | yes | no  |     | 2 1.5921E-12  | 195.03 |
| KEVHFFVN(de)ASDVDSVK                           | 1819.9105 | IPI0031004E | IPI0031004E | yes | yes |     | 2 0.017075    | 98.507 |
| KEQETCIAPEIEHGN(de)YSTTQR                      | 2490.1445 | IPI00122117 | IPI00122117 | yes | yes |     | 3 5.2746E-05  | 150.68 |
| KENGVFEEISNS(de)SGR                            | 1651.7802 | IPI00757771 | IPI00757771 | yes | no  |     | 2 1.4624E-21  | 212.95 |
| KENG(de)VFEEISNSSGR                            | 1651.7802 | IPI00757771 | IPI00757771 | yes | no  |     | 2 1.4624E-21  | 212.95 |
| KEN(de)SSYQVINWR                               | 1522.7528 | IPI0015331E | IPI0015331E | yes | yes | 2,3 | 4.9081E-19    | 200.21 |
| KEN(de)SSEICSNNGECVCGQCVC                      | 2646.0349 | IPI00132474 | IPI00132474 | yes | no  |     | 3 5.5172E-51  | 238.68 |
| KEDSCQIN(de)YSEGPCIGMQR                        | 2400.0144 | IPI00127352 | IPI00127352 | yes | yes | 2,3 | 6.8259E-09    | 192.62 |
| KDTCAQECSHFN(de)ITKVESR                        | 2309.0529 | IPI00132474 | IPI00132474 | yes | no  |     | 3 7.3131E-49  | 241.68 |
| KDTCAQECSHFN(de)ITK                            | 1837.8087 | IPI00132474 | IPI00132474 | yes | no  | 2,3 | 1.6236E-49    | 237.48 |
| KDGSQDFN(de)ETWENYEK                           | 1988.8388 | IPI0012820E | IPI0012820E | yes | yes |     | 2 4.7653E-05  | 171.78 |
| KCEVICN(de)QSNKPITITVEQSR                      | 2503.2523 | IPI00626537 | IPI00626537 | yes | yes |     | 3 0.0009792   | 114.46 |
| KCEAN(de)ITISSPAR                              | 1445.7297 | IPI00894972 | IPI00894972 | yes | no  |     | 2 0.0024419   | 138.21 |
| KAWGISVINP(de)NKTK                             | 1554.8882 | IPI0098909E | IPI0098909E | yes | yes | 2,3 | 0.0028181     | 143.93 |
| KAFITN(de)FSMIIDGVTYPGVVKEK                    | 2556.3662 | IPI00312711 | IPI00312711 | yes | no  |     | 3 0.0001715   | 163.68 |
| KAFITN(de)FSMIIDGVTYPGVVK                      | 2299.2286 | IPI00312711 | IPI00312711 | yes | no  | 2,3 | 7.9784E-05    | 152.47 |
| K(de)NITSPVGVQPIINEHTFCAGITK                   | 2623.3792 | IPI0040914E | IPI0040914E | yes | yes |     | 3 0.002136    | 91.337 |
| K(de)IVIYIEHNIKNSTK                            | 1928.0731 | IPI0032119C | IPI0032119C | yes | no  | 2,3 | 1.9909E-12    | 195.23 |
| IYWTDGDNISMANMDGSN(de)HTIIFSGQKGPVGIADFPESK    | 4325.0409 | IPI0011906E | IPI0011906E | yes | yes |     | 4 0.0006077   | 51.975 |
| IYWTDGDNISMANMDGSN(de)HTIIFSGQK                | 3014.3539 | IPI0011906E | IPI0011906E | yes | yes |     | 3 1.093E-09   | 146.97 |
| IYWTDGDN(de)ISMANMDGSNHTIIFSGQKGPVGIADFPESK    | 4325.0409 | IPI0011906E | IPI0011906E | yes | yes |     | 4 0.0006077   | 51.975 |
| IYWTDGDN(de)ISMANMDGSNHTIIFSGQK                | 3014.3539 | IPI0011906E | IPI0011906E | yes | yes |     | 3 1.093E-09   | 146.97 |
| IYWISSGNHTIN(de)R                              | 1559.7845 | IPI0011906E | IPI0011906E | yes | yes | 2,3 | 5.0678E-14    | 188.09 |
| IYWISSGN(de)HTINR                              | 1559.7845 | IPI0011906E | IPI0011906E | yes | yes | 2,3 | 5.0678E-14    | 188.09 |
| IYVIDGTQN(de)DTAFVFP                           | 1954.9789 | IPI0030865E | IPI0030865E | yes | no  |     | 2 0.000138    | 168.41 |
| IYSDQCHHNISIIPPTEIVCN(de)R                     | 2762.3269 | IPI0012344E | IPI0012344E | yes | yes |     | 3 0.0083815   | 74.698 |
| IYSDQCHHN(de)ISIIPPTEIVCNR                     | 2762.3269 | IPI0012344E | IPI0012344E | yes | yes |     | 3 0.0083815   | 74.698 |
| IYPIEN(de)ITIAPDPHPVPSIPPVAYNPWMDIR            | 3542.7908 | IPI01023131 | IPI01023131 | yes | no  |     | 3 1.044E-06   | 98.967 |
| IYNVTHQFCN(de)ASVMDPTCVR                       | 2411.0821 | IPI0013260C | IPI0013260C | yes | no  | 2,3 | 5.0365E-09    | 191.78 |
| IYN(de)VTHQFCNASVMDPTCVR                       | 2411.0821 | IPI0013260C | IPI0013260C | yes | no  | 2,3 | 5.0365E-09    | 191.78 |
| IYIRN(de)ESEFRDK                               | 1568.7947 | IPI0011597E | IPI0011597E | yes | yes |     | 3 0.048504    | 97.734 |
| IYIRN(de)ESEFR                                 | 1325.6728 | IPI0011597E | IPI0011597E | yes | yes |     | 2 0.022623    | 112.36 |
| IYIDHNN(de)ITR                                 | 1257.6466 | IPI00120187 | IPI00120187 | yes | yes |     | 2 9.5174E-06  | 175.15 |
| IYAGMVSIMDEAVGNV(de)TK                         | 1896.9325 | IPI0065235E | IPI0065235E | yes | no  |     | 2 6.6069E-06  | 178.88 |
| IWIPVN(de)ITWADIEDKDGR                         | 2140.0953 | IPI0012625E | IPI0012625E | yes | no  | 2,3 | 3.1412E-27    | 219.23 |
| IWDPSSHPGIQN(de)ISR                            | 1705.8536 | IPI0033820E | IPI0033820E | yes | no  |     | 2 0.0011159   | 127.57 |
| IVTQTIPCN(de)KTIFWSK                           | 1935.0288 | IPI0030796E | IPI0030796E | yes | yes |     | 2 0.0019637   | 136.63 |
| IVTQTIPCN(de)K                                 | 1172.6223 | IPI0030796E | IPI0030796E | yes | yes |     | 2 2.3393E-31  | 218.6  |
| IVPCEFGVIPIAEN(de)FSR                          | 2110.0557 | IPI0012190E | IPI0012190E | yes | no  |     | 3 0.0017468   | 115.38 |
| IVKIPSGTIVISN(de)ATEGDGGIYR                    | 2359.2747 | IPI0012915E | IPI0012915E | yes | no  |     | 3 0.0168      | 72.644 |
| IVIWTAEEQGGIGASQYIEIHKAN(de)ISK                | 3004.5294 | IPI0012605C | IPI0012605C | yes | no  |     | 3 0.043486    | 53.779 |
| IVIN(de)HTQMNTAIQWHPVDTFGPIQGYR                | 3345.7081 | IPI0060806E | IPI0060806E | yes | no  |     | 4 0.021483    | 52.019 |
| IVGSPFIGCTVVN(de)K                             | 1489.7963 | IPI0013480E | IPI0013480E | yes | no  |     | 2 0.0055131   | 107.65 |
| IVGGTN(de)ASIGEWVWQVSIQVK                      | 2268.1903 | IPI00113057 | IPI00113057 | yes | yes |     | 2 3.1523E-78  | 257.72 |
| IVEDIESFIKPYSVEEQKN(de)ITSCPDGAPFIQHGPDYR      | 4278.0579 | IPI00124221 | IPI00124221 | yes | yes |     | 4 1.6627E-16  | 119.42 |
| IVDVN(de)ITSEGKVK                              | 1400.7875 | IPI0011352E | IPI0011352E | yes | no  |     | 2 0.0027885   | 126.1  |
| IVDVN(de)ITSEK                                 | 1173.6241 | IPI0011352E | IPI0011352E | yes | no  |     | 2 0.004046    | 125.03 |
| IVAN(de)ISGCAAVNSETIMCCIR                      | 2338.0902 | IPI0022248E | IPI0022248E | yes | yes |     | 2 1.1414E-49  | 238.8  |
| IV(de)VPINNRENISDPTSPIRR                       | 2289.2553 | IPI0013692E | IPI0013692E | yes | no  |     | 3 0.0033943   | 107.51 |
| IV(de)VPINNRENISDPTSPIR                        | 2133.1542 | IPI0013692E | IPI0013692E | yes | no  | 2,3 | 0.0012002     | 131.18 |
| IV(de)SDVQTAVKTNSSFIQGFVDHVKEDCDR              | 3293.5987 | IPI0032119C | IPI0032119C | yes | no  |     | 3 0.0002704   | 80.786 |
| ITYESGFIN(de)YSK                               | 1420.6874 | IPI00666034 | IPI00666034 | yes | no  |     | 2 1.7229E-66  | 247.88 |
| ITVVYAEN(de)GTVIQGTTVASVYK                     | 2312.2264 | IPI0031735E | IPI0031735E | yes | yes | 2,3 | 6.3063E-79    | 223.93 |
| ITVPSSQN(de)SSFR                               | 1321.6626 | IPI0051536C | IPI0051536C | yes | no  |     | 2 0.02934     | 85.522 |
| ITSCATN(de)ASMCGDEAR                           | 1742.7022 | IPI0011906E | IPI0011906E | yes | yes |     | 2 2.2564E-18C | 314.51 |
| ITNEAHKEN(de)CTGR                              | 1528.7052 | IPI0076010E | IPI0076010E | yes | no  |     | 2 0.0099566   | 107.99 |
| ITN(de)VTFPTGVVTNIHGDMDK                       | 2158.0729 | IPI0079846E | IPI0079846E | yes | no  | 2,3 | 0.0003213     | 130.56 |
| ITN(de)QTIGFSFAVEQDIPVK                        | 2106.0997 | IPI0062466E | IPI0062466E | yes | yes | 2,3 | 3.1056E-20E   | 321.68 |
| ITN(de)ISDATKR                                 | 1117.6091 | IPI00849192 | IPI00849192 | yes | yes |     | 2 0.001706    | 162.26 |
| ITIEVFDVPKPSIEIN(de)KTEASTDSCHIR               | 3295.6758 | IPI0010994E | IPI0010994E | yes | yes |     | 3 9.4216E-12  | 151.06 |
| ITIAIN(de)NTITPHTIPPPTIVYK                     | 2376.3417 | IPI0030923C | IPI0030923C | yes | no  | 2,3 | 7.5515E-80    | 255.98 |
| ITHIPDDIPSNITVIN(de)ITHNQIR                    | 2623.4082 | IPI0032061E | IPI0032061E | yes | yes |     | 3 3.5595E-05  | 114.55 |
| ITHIPDDIPSN(de)ITVINITHNQIR                    | 2623.4082 | IPI0032061E | IPI0032061E | yes | yes |     | 3 3.5595E-05  | 114.55 |
| ITFFNSTIN(de)TSGIVAQGEAIPGHRPGIVTK             | 3405.8409 | IPI00153317 | IPI00153317 | yes | yes | 3,4 | 1.3096E-06    | 85.002 |
| ITEFTHN(de)STMDYK                              | 1585.7083 | IPI0013001C | IPI0013001C | yes | no  |     | 2 0.0017146   | 127.79 |
| ITDNMFCAGFKVN(de)DTK                           | 1859.8546 | IPI0011420E | IPI0011420E | yes | yes | 2,3 | 0.0048594     | 116.35 |
| ITANS(de)TWQPDKAK                              | 1458.7467 | IPI0065367E | IPI0065367E | yes | no  |     | 2 9.8821E-30  | 216.88 |
| ITANNSMGASPESIMVISN(de)DSGHEEVKEK              | 3073.4332 | IPI00118291 | IPI00118291 | yes | yes |     | 3 0.0012468   | 69.981 |
| ITAN(de)NSMGASPESIMVISNDSGHEEVKEK              | 3073.4332 | IPI00118291 | IPI00118291 | yes | yes |     | 3 0.0012468   | 69.981 |
| ISVPDGIKVSN(de)SSAR                            | 1528.8209 | IPI00120761 | IPI00120761 | yes | no  | 2,3 | 0.0020812     | 130.47 |
| ISTSPFAIN(de)ITMIPK                            | 1631.8957 | IPI00666034 | IPI00666034 | yes | no  |     | 2 7.3826E-07  | 169.94 |
| ISTNI(de)TIVCKPGDIESAPVIR                      | 2282.2304 | IPI00308971 | IPI00308971 | yes | yes |     | 2 0.0001901   | 122.53 |
| ISSPN(de)VTISCK                                | 1291.6442 | IPI0022571E | IPI0022571E | yes | no  |     | 2 4.0114E-09  | 177.81 |
| ISQN(de)ASIGPHVRPIPIQYEDKEVEPGTICDVAGWGVVTHAGR | 4552.2921 | IPI0011694E | IPI0011694E | yes | no  | 4,5 | 2.7632E-33    | 141.13 |
| ISQKN(de)QTVFER                                | 1348.7099 | IPI00130117 | IPI00130117 | yes | no  |     | 2 0.017798    | 105.65 |
| ISQAIGN(de)ITVVQK                              | 1369.7929 | IPI0011203E | IPI0011203E | yes | no  |     | 2 0.003407    | 115.34 |
| ISPIHAIN(de)FSIDPK                             | 1663.9297 | IPI0011597E | IPI0011597E | yes | yes |     | 2 0.0003214   | 142.91 |
| ISPGGAEMFQVQDMVVSQEKGND(de)CSIQR               | 2994.3998 | IPI00130117 | IPI00130117 | yes | no  |     | 3 0.0005035   | 78.352 |
| ISNISN(de)ISHDIVQEATDHAYNIQQEAEISR             | 3509.6659 | IPI0022344E | IPI0022344E | yes | yes | 3,4 | 1.1283E-12    | 163.32 |
| ISN(de)VTPEDAGTYCVK                            | 1815.8349 | IPI0012915E | IPI0012915E | yes | no  |     | 2 4.1389E-06  | 179.17 |
| ISN(de)ISNISHDIVQEATDHAYNIQQEAEISR             | 3509.6659 | IPI0022344E | IPI0022344E | yes | yes | 3,4 | 1.1283E-12    | 163.32 |
| ISISEN(de)YTISIANAK                            | 1622.8516 | IPI0012137E | IPI0012137E | yes | no  |     | 2 3.6172E-16  | 203.27 |
| ISHYN(de)DTYPISPPQR                            | 1786.8638 | IPI0011303E | IPI0011303E | yes | no  | 2,3 | 2.4087E-50    | 242.19 |

|                                            |           |             |             |     |     |     |   |            |        |
|--------------------------------------------|-----------|-------------|-------------|-----|-----|-----|---|------------|--------|
| ISHYKQN(de)FSFCR                           | 1585.746  | IPI00381303 | IPI00381303 | yes | yes |     | 2 | 0.0032816  | 122.46 |
| ISHEN(de)GTIICSK                           | 1357.666  | IPI00338094 | IPI00338094 | yes | yes |     | 2 | 0.0011381  | 131.35 |
| ISHDGN(de)ETIPIHIYVK                       | 1834.9577 | IPI00405742 | IPI00405742 | yes | no  | 2,3 |   | 3.3975E-11 | 283.1  |
| ISGNSIHN(de)ASIPHEIAYGSVITVK               | 2506.318  | IPI00221669 | IPI00221669 | yes | no  |     | 3 | 0.0001067  | 110.4  |
| ISGN(de)ITIIR                              | 985.59203 | IPI00137311 | IPI00137311 | yes | yes |     | 2 | 0.0077663  | 138.22 |
| ISGKPTN(de)VSVSVIMSEGDGICY                 | 2312.1028 | IPI00968978 | IPI00968978 | yes | no  |     | 2 | 1.5651E-30 | 223.54 |
| ISEN(de)GSSVAGIISSPNMEK                    | 1918.9306 | IPI00399798 | IPI00399798 | yes | no  |     | 2 | 0.0001336  | 145.52 |
| ISEGNRTITIINVTRN(de)DTGYPVCETR             | 2978.488  | IPI00108535 | IPI00108535 | yes | no  | 3,4 |   | 0.0018219  | 92.01  |
| ISEGNR(de)TITIINVTRNDTGPYVCETR             | 2978.488  | IPI00108535 | IPI00108535 | yes | no  | 3,4 |   | 0.0018219  | 92.01  |
| ISEGNR(de)TITIINVTR                        | 1685.9424 | IPI00108535 | IPI00108535 | yes | no  |     | 2 | 0.0099454  | 107.74 |
| ISEGN(de)RTITIINVTRNDTGPYVCETR             | 2978.488  | IPI00108535 | IPI00108535 | yes | no  | 3,4 |   | 0.0018219  | 92.01  |
| ISEGN(de)RTITIINVTR                        | 1685.9424 | IPI00108535 | IPI00108535 | yes | no  |     | 2 | 0.0099454  | 107.74 |
| ISEFIKN(de)ISASAR                          | 1563.8257 | IPI0089497C | IPI0089497C | yes | no  | 2,3 |   | 0.0066232  | 112.42 |
| ISDTN(de)ITAIPQGIPTSITEVHIDGNKITKVDAPSIK   | 3786.0415 | IPI0012319E | IPI0012319E | yes | yes |     | 4 | 1.2776E-05 | 72.687 |
| ISDTN(de)ITAIPQGIPTSITEVHIDGNKITK          | 3075.6452 | IPI0012319E | IPI0012319E | yes | yes | 3,4 |   | 3.6746E-11 | 124.31 |
| ISDTN(de)ITAIPQGIPTSITEVHIDGNK             | 2733.4185 | IPI0012319E | IPI0012319E | yes | yes | 2,3 |   | 2.6579E-09 | 117.35 |
| ISCAFKTEN(de)QTR                           | 1453.6984 | IPI0012024E | IPI0012024E | yes | no  |     | 2 | 0.022082   | 97.69  |
| ISASGAEIEAIEAQVIN(de)ISIK                  | 2155.1736 | IPI00312711 | IPI00312711 | yes | no  | 2,3 |   | 1.5546E-20 | 320.92 |
| ISAIIDNIIN(de)HSSIFIK                      | 1783.9832 | IPI00123342 | IPI00123342 | yes | yes | 2,3 |   | 1.3078E-17 | 305.29 |
| IRPIFN(de)KSFESTVGQGSYIFR                  | 2911.4505 | IPI00108844 | IPI00108844 | yes | yes | 3,4 |   | 2.0744E-08 | 143.47 |
| IRPHFISVCDPDFSQIN(de)CSEGYIQNYR            | 3314.5237 | IPI0011562E | IPI0011562E | yes | yes |     | 3 | 1.6679E-09 | 175.86 |
| IRNPCTSE(de)QNCTSPFSYK                     | 2187.9677 | IPI00132474 | IPI00132474 | yes | yes | 2,3 |   | 6.8986E-19 | 205.78 |
| IRN(de)SSIGGVINKYDVVIR                     | 2002.1324 | IPI00314673 | IPI00314673 | yes | yes |     | 3 | 0.0040303  | 130.4  |
| IRN(de)SSIGGVINK                           | 1256.7201 | IPI00314673 | IPI00314673 | yes | yes |     | 2 | 0.019809   | 98.902 |
| IRDYEEN(de)SSSCHKEVQIIK                    | 2334.1274 | IPI00330594 | IPI00330594 | yes | yes |     | 3 | 0.0006659  | 149    |
| IRDQIEDNVHISPN(de)GSIIIVGTRPSNHGAYR        | 3657.8612 | IPI0051536C | IPI0051536C | yes | yes |     | 4 | 3.941E-07  | 89.723 |
| IRDNAIGN(de)VSCTIHNEAIGQEK                 | 2438.1972 | IPI0012451E | IPI0012451E | yes | no  |     | 3 | 0.0001095  | 162.32 |
| IRAEQITIHAIGIGEAN(de)KTQIR                 | 2431.3659 | IPI00990932 | IPI00990932 | yes | no  |     | 3 | 0.0001626  | 116.39 |
| IQKIQD(de)FFNGKEINK                        | 1934.0625 | IPI00323357 | IPI00323357 | yes | no  |     | 3 | 0.0038976  | 137.46 |
| IQKENDNFN(de)ISKDDIDITIFHGENK              | 2946.4359 | IPI0067425E | IPI0067425E | yes | yes |     | 3 | 7.4696E-06 | 120.33 |
| IQIEFRPIDIN(de)STAAGIPR                    | 2110.1535 | IPI0011551C | IPI0011551C | yes | yes | 2,3 |   | 9.6781E-08 | 183.31 |
| IQDIEITGSPVSNISAHIFSN(de)ISSIEK            | 2898.4975 | IPI00119522 | IPI00119522 | yes | yes | 3,4 |   | 3.5013E-11 | 183.01 |
| IQDIEITGSPVSN(de)SAHIFSNISSIEK             | 2898.4975 | IPI00119522 | IPI00119522 | yes | yes | 3,4 |   | 3.5013E-11 | 183.01 |
| IQDFIVDNETFSGFIQHN(de)ISIPR                | 2689.35   | IPI00112614 | IPI00112614 | yes | yes |     | 3 | 1.5387E-05 | 164.99 |
| IQDFIVDN(de)ETFSGFIQHNISIPR                | 2689.35   | IPI00112614 | IPI00112614 | yes | yes |     | 3 | 1.5387E-05 | 164.99 |
| IQCVDGN(de)WTTIPVCIEER                     | 2318.0671 | IPI0013001C | IPI0013001C | yes | no  |     | 2 | 1.0432E-06 | 183.06 |
| IPVAVIN(de)ATAK                            | 1095.6652 | IPI00122491 | IPI00122491 | yes | yes |     | 2 | 0.0045602  | 121.9  |
| IPSSIENATSISIMN(de)ITGTAICHISDIPPDGIR      | 3492.7593 | IPI0012177E | IPI0012177E | yes | yes | 3,4 |   | 1.2977E-15 | 128.91 |
| IPSSIEN(de)ATSISIMNITGTAICHISDIPPDGIR      | 3492.7593 | IPI0012177E | IPI0012177E | yes | yes | 3,4 |   | 1.2977E-15 | 128.91 |
| IPQQIHYYIN(de)ASDWER                       | 2005.9759 | IPI00666034 | IPI00666034 | yes | no  |     | 3 | 0.021619   | 85.837 |
| IPQGTFSNIEN(de)ITIIDIQHKN                  | 2394.2543 | IPI00129867 | IPI00129867 | yes | no  |     | 3 | 0.0002386  | 114.99 |
| IPNNTQWITW(de)SPEGHK                       | 1906.9326 | IPI00125813 | IPI00125813 | yes | no  | 2,3 |   | 5.077E-06  | 178.23 |
| IPN(de)ISIDVIQPSFPEIIIESHMVMIR             | 2990.5973 | IPI0022166E | IPI0022166E | yes | no  |     | 3 | 3.5628E-05 | 108.5  |
| IPFSPENTREEDFYVN(de)ETSTVK                 | 2601.2235 | IPI0011610E | IPI0011610E | yes | yes |     | 3 | 4.1057E-06 | 175.33 |
| IPFNVIMNVEDIIEQQTFN(de)DTVSPR              | 3032.4913 | IPI0031004E | IPI0031004E | yes | yes | 3,4 |   | 0.0001835  | 103.92 |
| IPFN(de)ISEWQK                             | 1260.6503 | IPI00118011 | IPI00118011 | yes | no  |     | 2 | 0.018566   | 106.29 |
| IPEN(de)QTIPGEIPEHAGPAEGVHDSR              | 2649.2783 | IPI00856221 | IPI00856221 | yes | yes |     | 3 | 0.0005282  | 87.319 |
| INSAPVEGYSEHVGN(de)KTTIR                   | 2171.0971 | IPI0034983C | IPI0034983C | yes | no  | 2,3 |   | 4.1682E-05 | 177    |
| INSAPVEGYSEHVGN(de)K                       | 1699.8166 | IPI0034983C | IPI0034983C | yes | no  |     | 2 | 4.6182E-05 | 154.88 |
| INNGGCQDICIITHQGHVN(de)CSCR                | 2712.1737 | IPI00119063 | IPI00119063 | yes | yes |     | 3 | 0.0019578  | 93.381 |
| INN(de)ITNIGPIDMK                          | 1441.7599 | IPI0033068C | IPI0033068C | yes | no  |     | 2 | 8.1626E-14 | 185.95 |
| INMTIPDAIVPTFSISN(de)HSIK                  | 2297.209  | IPI0046921E | IPI0046921E | yes | yes | 2,3 |   | 1.1613E-15 | 299.43 |
| INIDGSNY(de)TIK                            | 1349.7191 | IPI00119063 | IPI00119063 | yes | yes |     | 2 | 4.292E-19  | 198.32 |
| INETHIFN(de)GSNWIMIIYK                     | 2192.1088 | IPI00108844 | IPI00108844 | yes | yes | 2,3 |   | 0.0001307  | 162.46 |
| IN(de)YTIVGEPIR                            | 1273.703  | IPI00120674 | IPI00120674 | yes | no  |     | 2 | 0.018082   | 97.463 |
| IN(de)YTCNQGYR                             | 1287.5666 | IPI00138061 | IPI00138061 | yes | no  |     | 2 | 1.3251E-22 | 211.64 |
| IN(de)YSIPTGQSMEVQIPK                      | 1903.9713 | IPI0040393E | IPI0040393E | yes | no  |     | 2 | 0.0020387  | 128.74 |
| IN(de)VTSPDIFR                             | 1160.619  | IPI00116913 | IPI00116913 | yes | yes |     | 2 | 0.0037173  | 136.48 |
| IN(de)VTEVYDKIK                            | 1320.7289 | IPI00225072 | IPI00225072 | yes | no  |     | 2 | 6.4707E-24 | 206.1  |
| IN(de)VTEVYDK                              | 1079.5499 | IPI00225072 | IPI00225072 | yes | no  |     | 2 | 0.040974   | 97.734 |
| IN(de>VSYTGERPSSNMVIVDVK                   | 2207.1256 | IPI00624663 | IPI00624663 | yes | yes | 2,3 |   | 5.6965E-05 | 147.09 |
| IN(de>VSYTGER                              | 1037.5142 | IPI00624663 | IPI00624663 | yes | yes |     | 2 | 0.0002412  | 172.27 |
| IN(de>VSHAGAPIGEEYIIVFSR                   | 2171.1375 | IPI00785452 | IPI00785452 | yes | no  |     | 3 | 0.0077947  | 87.24  |
| IN(de>TTSDEKDPTNPFRFPNIGVEK                | 2618.2976 | IPI00131881 | IPI00131881 | yes | no  |     | 3 | 0.0015143  | 105.5  |
| IN(de>TTSDEKDPTNPFR                        | 1733.822  | IPI00131881 | IPI00131881 | yes | no  |     | 2 | 3.0184E-07 | 173.71 |
| IN(de>NSQIK                                | 815.45012 | IPI00222967 | IPI00222967 | yes | no  |     | 2 | 0.027071   | 137.18 |
| IN(de>MTIPDAIVPTFSISNHSIK                  | 2297.209  | IPI0046921E | IPI0046921E | yes | yes | 2,3 |   | 1.1613E-15 | 299.43 |
| IN(de>KTVAIHTIDPEKIGQGGVQK                 | 2345.3067 | IPI00323624 | IPI00323624 | yes | no  |     | 3 | 9.4813E-05 | 169.67 |
| IN(de>KTVAIHTIDPEK                         | 1577.8777 | IPI00323624 | IPI00323624 | yes | no  |     | 2 | 0.0001052  | 159.18 |
| IN(de>ITDTPK                               | 900.49165 | IPI0012239E | IPI0012239E | yes | no  |     | 2 | 0.026159   | 113.71 |
| IN(de>ITSWKET                              | 1090.5659 | IPI0011348C | IPI0011348C | yes | no  |     | 2 | 0.022495   | 128.81 |
| IN(de>ITAAQISQIEGIIQAR                     | 1938.0898 | IPI0011551E | IPI0011551E | yes | no  |     | 3 | 3.8498E-19 | 205.78 |
| IN(de>ISEGEVAATVK                          | 1329.714  | IPI00458003 | IPI00458003 | yes | yes |     | 2 | 2.7386E-32 | 220.85 |
| IN(de>GTDPPIVAADSKR                        | 1455.7682 | IPI00119063 | IPI00119063 | yes | yes |     | 2 | 7.82E-29   | 217.48 |
| IN(de>GTDPPIVAADSK                         | 1299.667  | IPI00119063 | IPI00119063 | yes | yes |     | 2 | 6.6369E-66 | 250.52 |
| IN(de>FTGPGEPDSIR                          | 1401.6888 | IPI0032060E | IPI0032060E | yes | no  |     | 2 | 1.3822E-05 | 162.97 |
| IN(de>ETHIFNGSNWIMIIYK                     | 2192.1088 | IPI00108844 | IPI00108844 | yes | yes | 2,3 |   | 0.0001307  | 162.46 |
| IN(de>ATHFYACGTHAFQPICAAIDAETFIIPTSFEEGKEK | 4284.0296 | IPI0012466E | IPI0012466E | yes | no  |     | 4 | 0.0002488  | 63.776 |
| IMQDPIQQAEGIYCN(de)R                       | 1934.8979 | IPI0031454E | IPI0031454E | yes | yes | 2,3 |   | 1.514E-05  | 172.91 |
| IMNIEFYDCSCVSGSGFQKGN(de)HSAR              | 2863.2476 | IPI0023031E | IPI0023031E | yes | no  |     | 3 | 0.0004305  | 105.06 |
| IMNAPIYIAEWQNITKN(de)ISED                  | 2618.3163 | IPI00930882 | IPI00930882 | yes | no  |     | 3 | 0.0075954  | 81.157 |
| IMNAPIYIAEWQN(de)ITKNISED                  | 2618.3163 | IPI00930882 | IPI00930882 | yes | no  |     | 3 | 0.0075954  | 81.157 |
| IMNAPIYIAEWQN(de)ITK                       | 1903.9866 | IPI00930882 | IPI00930882 | yes | no  | 2,3 |   | 8.7806E-06 | 175.66 |
| IMESHPN(de)GTFSAK                          | 1417.666  | IPI00177214 | IPI00177214 | yes | no  |     | 2 | 0.0003652  | 157.56 |
| IKVSN(de>VSCEASVSK                         | 1506.7712 | IPI0013556C | IPI0013556C | yes | no  |     | 2 | 0.0057274  | 114.59 |
| IKN(de>TTNQIAIK                            | 1355.8136 | IPI0098598E | IPI0098598E | yes | no  |     | 2 | 2.7502E-05 | 166.7  |

|                                           |           |             |             |     |     |       |             |        |
|-------------------------------------------|-----------|-------------|-------------|-----|-----|-------|-------------|--------|
| IKN(de)ITDISQK                            | 1158.6608 | IPI0011929E | IPI0011929E | yes | no  | 2     | 0.020783    | 115.29 |
| IKN(de)ATV/TQYQIK                         | 1405.7929 | IPI00221547 | IPI00221547 | yes | no  | 2     | 0.0075149   | 113.69 |
| IKIMESH(de)PNGTFSK                        | 1658.845  | IPI00177214 | IPI00177214 | yes | no  | 2     | 0.000503    | 145.46 |
| IKIDN(de)YSTQEIGR                         | 1535.7944 | IPI00122257 | IPI00122257 | yes | no  | 2,3   | 0.0008945   | 154.36 |
| IKGEAEYQEIRNPN(de)GTVTVISR                | 2473.2925 | IPI0031140E | IPI0031140E | yes | yes | 3     | 0.0001777   | 115.63 |
| IKFIEAGIYEVPIITDSGNPPKSN(de)JISIIR        | 3296.8384 | IPI00323134 | IPI00323134 | yes | no  | 3,4   | 7.5863E-14  | 140.09 |
| IKEQVVGIIAQNN(de)CSCEK                    | 2176.0616 | IPI00122592 | IPI00122592 | yes | yes | 3     | 5.406E-05   | 176.49 |
| IY(de)EGGDIPDFRKENSZYQVINWR               | 2898.4301 | IPI0015331E | IPI0015331E | yes | yes | 3     | 3.9765E-05  | 118.96 |
| IITN(de)NSQTPIISPQEVVSCSPYAQGCDDGGFPYIAGK | 3980.9288 | IPI0013001E | IPI0013001E | yes | yes | 4     | 7.7495E-18  | 122.06 |
| IITHTIEGPSQN(de)VTIIQIPWQDPESWER          | 3414.7208 | IPI0047319C | IPI0047319C | yes | no  | 3     | 1.9109E-15  | 112.26 |
| IISQKN(de)SSQAR                           | 1230.668  | IPI00420867 | IPI00420867 | yes | no  | 2     | 0.0097875   | 115.29 |
| IISQAPSTSPNMFTINN(de)ETGDIITVAAGIDREK     | 3599.8141 | IPI00323134 | IPI00323134 | yes | no  | 3,4   | 1.173E-09   | 104.83 |
| IQYYGN(de)FSR                             | 1259.6299 | IPI0026796E | IPI0026796E | yes | yes | 2     | 0.0038739   | 135.99 |
| IQVVYIHSNN(de)ITK                         | 1640.925  | IPI00123194 | IPI00123194 | yes | yes | 2,3   | 6.7758E-29  | 213.99 |
| IQTAEHN(de)JSGAER                         | 1537.7849 | IPI0040393E | IPI0040393E | yes | no  | 2     | 0.021041    | 152.07 |
| IQQQSN(de)QSSQFIHSVER                     | 2128.0661 | IPI00876541 | IPI00876541 | yes | no  | 2,3   | 9.7794E-06  | 180.31 |
| IIPHIEKPIQN(de)FTICFR                     | 2125.1507 | IPI00309214 | IPI00309214 | yes | yes | 2,3,4 | 0.0012761   | 140.46 |
| IIPAFN(de)TTSGIPYPR                       | 1645.8828 | IPI00127672 | IPI00127672 | yes | no  | 2     | 0.0075789   | 102.65 |
| IINN(de)ITSIK                             | 1014.6073 | IPI0040001E | IPI0040001E | yes | no  | 2     | 0.0044261   | 152.97 |
| IINKFN(de)SSSSSIEEK                       | 1681.8523 | IPI00338561 | IPI00338561 | yes | yes | 2     | 4.3161E-50  | 242.19 |
| IINDYVSN(de)QTQGMK                        | 1722.8611 | IPI0013563E | IPI0013563E | yes | no  | 2     | 2.8405E-10  | 187    |
| IIN(de)TTDVYIIPSINPDGFER                  | 2276.1689 | IPI0013057E | IPI0013057E | yes | yes | 2     | 0.0005762   | 111.83 |
| IIN(de)QTIRENIKK                          | 1468.8726 | IPI0046006E | IPI0046006E | yes | no  | 2     | 0.0052273   | 128.85 |
| IIN(de)QTIRENIK                           | 1340.7776 | IPI0046006E | IPI0046006E | yes | no  | 2     | 1.3695E-07  | 179.57 |
| IIN(de)QTIR                               | 856.51305 | IPI0046006E | IPI0046006E | yes | no  | 2     | 1.3221E-10  | 187.34 |
| IIN(de)QTADMIQIASK                        | 1544.8232 | IPI00126864 | IPI00126864 | yes | no  | 2     | 5.9389E-29  | 216.27 |
| IIN(de)KSMEIIDER                          | 1459.7705 | IPI00112614 | IPI00112614 | yes | yes | 2     | 0.0083079   | 114.24 |
| IIN(de)ITFIDITR                           | 1317.7656 | IPI0034356E | IPI0034356E | yes | no  | 2     | 1.6591E-11  | 186.76 |
| IIN(de)HSIIHK                             | 1186.7186 | IPI0040660E | IPI0040660E | yes | yes | 2,3   | 0.0004778   | 167.67 |
| IIN(de)ETIYENAK                           | 1306.6769 | IPI0015375E | IPI0015375E | yes | yes | 2     | 1.1236E-07  | 177.83 |
| IISPSAFHDGN(de)FSIIR                      | 1999.0891 | IPI0031051E | IPI0031051E | yes | no  | 2     | 0.0010949   | 126.07 |
| IISPEEN(de)VTITCTAENQIER                  | 2429.2108 | IPI0012137E | IPI0012137E | yes | no  | 2     | 1.1997E-49  | 237.76 |
| IIN(de)WTQGQTSQVIR                        | 1684.9261 | IPI0067465E | IPI0067465E | yes | no  | 2     | 1.7952E-287 | 242.91 |
| IIN(de)FTSMDIYR                           | 1484.7697 | IPI0012518E | IPI0012518E | yes | no  | 2     | 4.9286E-09  | 177.42 |
| IIGGIPVSGTFHN(de)FSGCISNVFVQR             | 2818.4589 | IPI0011691E | IPI0011691E | yes | no  | 3     | 0.0002019   | 99.603 |
| IIGVPSIEDIDEVIIHNIPDAIGVIFN(de)DSFSYQIK   | 3883.0295 | IPI0017014E | IPI0017014E | yes | no  | 4     | 0.0016993   | 59.536 |
| IIGGDEDAIRPQMQUIIDFETAIAN(de)ITIPQEK      | 3623.8505 | IPI0039684C | IPI0039684C | yes | no  | 3     | 2.6413E-18  | 151.12 |
| IIFAN(de)VSVR                             | 1017.5971 | IPI0017315E | IPI0017315E | yes | no  | 2     | 0.0070308   | 140.16 |
| IIEYRN(de)TSSEYHIAR                       | 1850.9275 | IPI0011185E | IPI0011185E | yes | no  | 3     | 0.023783    | 95.631 |
| IIEFDSTN(de)ASEGAQPPGKPYPPYSIAK           | 2876.4232 | IPI0045943E | IPI0045943E | yes | yes | 3     | 8.6079E-18  | 197.85 |
| IIDIIPDGYPIQISCIPKEEN(de)ATIATYPEFGVIDIK  | 3932.0169 | IPI00124221 | IPI00124221 | yes | no  | 3     | 3.4746E-05  | 75.887 |
| IIDIDSCIDRSN(de)YSVIDITPVAIIPK            | 3000.5842 | IPI0022507E | IPI0022507E | yes | no  | 3     | 0.0047965   | 69.98  |
| IIASPNEENM(de)TEIISMR                     | 1946.9441 | IPI0032257E | IPI0032257E | yes | no  | 2,3   | 6.5789E-06  | 176.4  |
| IIASN(de)ITETMR                           | 1247.6544 | IPI0013260C | IPI0013260C | yes | no  | 2     | 2.5187E-05  | 168.02 |
| IIAN(de)ISYTIQIDGHR                       | 1712.921  | IPI0089497E | IPI0089497E | yes | no  | 2     | 0.0011695   | 130.98 |
| IAENNEIISNIRDSVIN(de)ISESVEDGPR           | 3095.5735 | IPI00114044 | IPI00114044 | yes | yes | 3     | 4.9195E-10  | 153.59 |
| IHYIYQNNFITEIPIESFQN(de)ATGIR             | 3093.5924 | IPI0012229E | IPI0012229E | yes | yes | 3,4   | 8.4932E-10  | 163.4  |
| IHVAQPEN(de)DSHVAIK                       | 1769.9424 | IPI0085041E | IPI0085041E | yes | yes | 2,3   | 7.8705E-05  | 158.11 |
| IHRIN(de)ASIADIQSK                        | 1564.8685 | IPI0011691E | IPI0011691E | yes | no  | 2,3   | 1.0505E-14  | 194.48 |
| IHN(de)GSEEAIQYK                          | 1458.7103 | IPI0038029E | IPI0038029E | yes | no  | 2     | 0.0034598   | 115.12 |
| IHKDN(de)TTCYEFK                          | 1682.8086 | IPI0011906E | IPI0011906E | yes | yes | 2,3   | 2.7748E-05  | 164.53 |
| IHKDN(de)TTCYEFK                          | 1554.7137 | IPI0011906E | IPI0011906E | yes | yes | 2     | 0.0019741   | 133.32 |
| IHIIPSMNPDGYEVAQAQGN(de)MSGYIVGR          | 3056.4848 | IPI0012826C | IPI0012826C | yes | yes | 3     | 1.0882E-48  | 229.1  |
| IHIGNYN(de)GTAGDAIR                       | 1570.7852 | IPI00310797 | IPI00310797 | yes | yes | 2     | 0.026939    | 83.633 |
| IHHWSSPKPICSIVN(de)SSIVVK                 | 2387.2784 | IPI00118011 | IPI00118011 | yes | yes | 3     | 9.0701E-05  | 146.81 |
| IHEISN(de)ETFR                            | 1244.6149 | IPI00321074 | IPI00321074 | yes | yes | 2     | 0.0035632   | 136.96 |
| IGYDPYANPPNYGNPDPIVIN(de)NTHR             | 2810.3412 | IPI0031643C | IPI0031643C | yes | no  | 3     | 9.5287E-10  | 156.87 |
| IGVTN(de)ASIVIFRPGSVR                     | 1785.0261 | IPI0065267E | IPI0065267E | yes | yes | 3     | 0.0042967   | 116.19 |
| IGVQMHPGQEIHN(de)FTITGR                   | 2134.0742 | IPI0011929E | IPI0011929E | yes | no  | 2,3,4 | 0.00054     | 125.28 |
| IGVIEDHSN(de)R                            | 1138.5731 | IPI0012952E | IPI0012952E | yes | no  | 2     | 0.0019861   | 141.88 |
| IGNFSEIATHN(de)QTFIK                      | 1818.9264 | IPI0085510E | IPI0085510E | yes | no  | 2     | 7.7732E-05  | 157.74 |
| IGN(de)WTGEWPETEIVANIWMK                  | 2373.1464 | IPI00322497 | IPI00322497 | yes | yes | 2,3   | 2.0428E-49  | 239.55 |
| IGN(de)VTTWISSNPPVTFAAIWEEPVDVSGHK        | 3401.6568 | IPI0022507E | IPI0022507E | yes | no  | 3     | 2.7131E-14  | 143.08 |
| IGN(de)FTIAYSAPKPETADNQR                  | 2095.0334 | IPI0022919E | IPI0022919E | yes | no  | 2     | 0.0010421   | 128.38 |
| IGN(de)FSEIATHNQTFIK                      | 1818.9264 | IPI0085510E | IPI0085510E | yes | no  | 2     | 7.7732E-05  | 157.74 |
| IGISFNSITVMEN(de)GSIANVPHIR               | 2468.2846 | IPI0012319E | IPI0012319E | yes | yes | 2,3   | 5.1037E-15E | 300.97 |
| IGHTN(de)ASIMIFEVK                        | 1558.8177 | IPI0085815E | IPI0085815E | yes | yes | 2     | 0.0005723   | 147.35 |
| IGGWN(de)ITGPWAK                          | 1298.6772 | IPI0039684C | IPI0039684C | yes | no  | 2     | 0.0017659   | 149.41 |
| IGAINSTISN(de)ESKEAFIDWAR                 | 2321.1652 | IPI0018735E | IPI0018735E | yes | yes | 3     | 0.0040275   | 98.391 |
| IGAINSTISN(de)ESK                         | 1332.6885 | IPI0018735E | IPI0018735E | yes | yes | 2     | 5.315E-06   | 166.86 |
| IGAIN(de)STISNESKEAFIDWAR                 | 2321.1652 | IPI0018735E | IPI0018735E | yes | yes | 3     | 0.0040275   | 98.391 |
| IGAIN(de)STISNESK                         | 1332.6885 | IPI0018735E | IPI0018735E | yes | yes | 2     | 5.315E-06   | 166.86 |
| IGAIN(de)NSIIIEDR                         | 1539.8621 | IPI0011551E | IPI0011551E | yes | no  | 2     | 3.9849E-21  | 205.3  |
| IFTPVSSVPN(de)ITWSEISAIEIK                | 2543.3887 | IPI0065272E | IPI0065272E | yes | no  | 3     | 0.0023905   | 89.668 |
| IFIFN(de)QTGIEAKK                         | 1507.8399 | IPI00378224 | IPI00378224 | yes | yes | 2     | 0.0024792   | 141.58 |
| IFIFN(de)QTGIEAK                          | 1379.7449 | IPI00378224 | IPI00378224 | yes | yes | 2     | 3.7975E-82  | 263.44 |
| IFFVNP(de)APPYIWPAAHKNEIMINSSIMR          | 3184.6354 | IPI0037869E | IPI0037869E | yes | no  | 4     | 0.015815    | 56.29  |
| IETIIN(de)GTDR                            | 1243.6772 | IPI0011906E | IPI0011906E | yes | no  | 2     | 0.0027555   | 132.5  |
| IEQMTMNIN(de)ITGPIAPYK                    | 2130.0853 | IPI0030999E | IPI0030999E | yes | no  | 2     | 0.0030162   | 92.633 |
| IEPEHIQIQN(de)ISQEQIAQVATIATK             | 2801.4923 | IPI00165807 | IPI00165807 | yes | no  | 3     | 2.6993E-05  | 101.75 |
| IEN(de)ITTGTYYIHAQK                       | 1688.8733 | IPI0022242E | IPI0022242E | yes | yes | 2     | 0.0011236   | 131.86 |
| IEN(de)ISSTESGYTATITR                     | 1841.9007 | IPI0011196C | IPI0011196C | yes | no  | 2     | 8.3572E-77  | 254.82 |
| IEIVPIIYDN(de)DSIFVQTDK                   | 2221.1518 | IPI0040554E | IPI0040554E | yes | yes | 2     | 4.8985E-38  | 232.54 |
| IEGITN(de)ETYR                            | 1194.5881 | IPI0011929E | IPI0011929E | yes | no  | 2     | 0.0044687   | 134.13 |
| IEGIAN(de)VSR                             | 1070.6084 | IPI0011551E | IPI0011551E | yes | no  | 2     | 0.002338    | 140.78 |
| IEDRFN(de)STIGPSEEQEKNWPGGPR              | 2799.3212 | IPI0011551E | IPI0011551E | yes | no  | 3     | 1.1956E-08  | 131.56 |

|                                         |           |             |             |     |     |       |               |        |
|-----------------------------------------|-----------|-------------|-------------|-----|-----|-------|---------------|--------|
| IEDRFN(de)STIGPSEEQEK                   | 1977.928  | IPI0011551€ | IPI0011551€ | yes | no  | 2,3   | 3.848E-08     | 186.98 |
| IEDGFHPDAVAWAN(de)ITNAIR                | 2209.0916 | IPI0016573C | IPI0016573C | yes | no  | 2,3   | 1.9138E-20    | 213.03 |
| IEAYFSIEGFPAEQN(de)ASNR                 | 2142.0018 | IPI0011431€ | IPI0011431€ | yes | yes | 2,3   | 2.5088E-77    | 254.82 |
| IEAVIPAEFFEVISSSQN(de)GSYHHR            | 2829.4086 | IPI0034215€ | IPI0034215€ | yes | no  |       | 4 3.3596E-06  | 118.52 |
| IDWIGN(de)CSGINDDSYGYR                  | 2103.8956 | IPI0012155C | IPI0012155C | yes | yes |       | 2 7.9108E-29  | 223.5  |
| IDVSQN(de)VSSDTQSCSTK                   | 2098.8961 | IPI0012076€ | IPI0012076€ | yes | no  |       | 2 6.5145E-95  | 272.48 |
| IDVNSWIEN(de)FTK                        | 1464.7249 | IPI0062679€ | IPI0062679€ | yes | no  |       | 2 5.1651E-81  | 254.89 |
| IDSFN(de)DSTFMIVYTPITPTQR               | 2546.2363 | IPI0032257€ | IPI0032257€ | yes | no  | 2,3   | 2.0747E-06    | 163.45 |
| IDRNPSPEIPQVGN(de)ISIK                  | 2091.096  | IPI0030899C | IPI0030899C | yes | yes | 2,3   | 0.0002245     | 146.1  |
| IDPPCTN(de)TTAPSNYINNPYVR               | 2406.1274 | IPI0065853€ | IPI0065853€ | yes | no  | 2,3   | 1.7967E-13    | 199.97 |
| IDNYS(de)TQEIGR                         | 1294.6153 | IPI00122257 | IPI00122257 | yes | no  |       | 2 0.005201    | 117.2  |
| IDITDFEKN(de)SSFAQYQSFK                 | 2267.0746 | IPI00121312 | IPI00121312 | yes | yes |       | 3 0.00097     | 164.01 |
| IDIPVNTSIPNVTEIKEN(de)MTFGSTIVTNP       | 3271.701  | IPI00466371 | IPI01026704 | no  | no  |       | 3 2.5903E-12  | 154.7  |
| IDIPVNTSIPN(de)VTEIKENMTFGSTIVTNP       | 3271.701  | IPI00466371 | IPI01026704 | no  | no  |       | 3 2.5903E-12  | 154.7  |
| IDIPVNTSIPN(de)VTEIK                    | 1751.9669 | IPI00466371 | IPI01026704 | no  | no  |       | 2 2.7513E-05  | 152.94 |
| IDIPVN(de)TSIPNVTEIKENMTFGSTIVTNP       | 3271.701  | IPI00466371 | IPI01026704 | no  | no  |       | 3 2.5903E-12  | 154.7  |
| IDIPVN(de)TSIPNVTEIK                    | 1751.9669 | IPI00466371 | IPI01026704 | no  | no  |       | 2 2.7513E-05  | 152.94 |
| IDGATVDTHHIPVN(de)VTIR                  | 1957.0381 | IPI00751912 | IPI00751912 | yes | yes |       | 3 0.002808    | 107.61 |
| IDFIVINE(de)TR                          | 1218.6608 | IPI0012581€ | IPI0012581€ | yes | no  |       | 2 0.0048149   | 133.05 |
| IDETDCIGN(de)WTWQEGSQQTIK               | 2508.1227 | IPI0012297€ | IPI0012297€ | yes | no  | 2,3   | 2.2077E-78    | 259.64 |
| IDCYPDEHGASEAN(de)CSAR                  | 2050.8109 | IPI0084869€ | IPI0084869€ | yes | yes |       | 2 4.2578E-08  | 183.77 |
| IDAYNEAAVSIIN(de)SSTR                   | 1822.9061 | IPI0038029€ | IPI0038029€ | yes | yes |       | 2 0.0001931   | 146.88 |
| IDAPTNIQFVN(de)ETDRTVIVTWTPPR           | 2882.4927 | IPI0011353€ | IPI0011353€ | yes | no  | 3,4   | 2.4901E-09    | 171.35 |
| IDAPTNIQFVN(de)ETDR                     | 1731.8428 | IPI0011353€ | IPI0011353€ | yes | no  | 2,3   | 4.5798E-08    | 180.7  |
| ICQN(de)ISK                             | 861.43784 | IPI00126184 | IPI00126184 | yes | yes |       | 2 0.018067    | 147.34 |
| ICN(de)ECSDGSFHISK                      | 1652.6923 | IPI0051536C | IPI0051536C | yes | no  |       | 2 0.0001112   | 155.57 |
| ICHTHGWN(de)ETSEIMPPGAVFSCIYR           | 2961.336  | IPI0012239€ | IPI0012239€ | yes | no  |       | 3 0.0007094   | 84.573 |
| ICEGDRFCIIDVMSTGSSSVGN(de)ATR           | 2731.2364 | IPI0074965€ | IPI0074965€ | yes | no  |       | 3 1.9802E-09  | 171.5  |
| IAVTN(de)TTMTGTVIK                      | 1448.7909 | IPI00108041 | IPI00108041 | yes | yes |       | 2 1.019E-08   | 182.02 |
| IAVISGCKN(de)TTSAAMVHCIR                | 2188.0915 | IPI0013121€ | IPI0013121€ | yes | yes | 2,3   | 6.0428E-05    | 161.86 |
| IAVDWESIGYN(de)ITR                      | 1635.8257 | IPI0012304C | IPI0012304C | yes | no  |       | 2 5.8164E-15  | 194.55 |
| IATITCHIIPSDVSQVN(de)VSIIIWKPTFIK       | 3292.8257 | IPI00466371 | IPI01026704 | no  | no  |       | 3 0.0002273   | 79.382 |
| IAPPSQGEVPPGPIPEAVIAIYN(de)STR          | 2759.4494 | IPI00114457 | IPI00114457 | yes | yes |       | 3 0.016582    | 57.694 |
| IASAVQKN(de)ATSTK                       | 1317.7252 | IPI0040001€ | IPI0040001€ | yes | no  |       | 2 0.028542    | 92.65  |
| IAQEGGAAAIIAN(de)NSVIIPSSR              | 2264.2488 | IPI0012177€ | IPI0012177€ | yes | yes |       | 3 0.0055647   | 78.708 |
| IAPASN(de)VSHTVVIRPIK                   | 1801.0574 | IPI0046718C | IPI0046718C | yes | yes |       | 2 6.1446E-27  | 216.01 |
| IAPASN(de)VSHTVVIR                      | 1462.8256 | IPI0046718C | IPI0046718C | yes | yes |       | 2 0.0015501   | 121.99 |
| IAN(de)FSQSCTIYSGDDIVEAIPKPCPGCPR       | 3251.505  | IPI0011495€ | IPI0011495€ | yes | no  |       | 3 5.625E-74   | 246.39 |
| IAN(de)ETGGHGSGR                        | 1251.5956 | IPI0030923C | IPI0030923C | yes | no  |       | 2 0.0007931   | 150.26 |
| IAITPAHIIIFIADN(de)HTEPAAHFR            | 2554.3445 | IPI00230324 | IPI00230324 | yes | no  |       | 4 0.028261    | 61.87  |
| IAISFPN(de)ITSDGYPVIYPTGWSSSDNVNCRPR    | 3582.7202 | IPI00466371 | IPI01026704 | no  | no  | 3,4   | 5.2367E-18    | 164.31 |
| IAGGENN(de)CSGRVEIK                     | 1602.7784 | IPI0076010€ | IPI0076010€ | yes | no  |       | 2 0.033501    | 90.707 |
| IAGGEN(de)NCSGRVEIK                     | 1602.7784 | IPI0076010€ | IPI0076010€ | yes | no  |       | 2 0.033501    | 90.707 |
| IACIN(de)GTVIR                          | 1115.6121 | IPI0013480€ | IPI0013480€ | yes | no  |       | 2 0.0045447   | 133.89 |
| I(de)VQAQYWHDPKESVYRNYISIFIADINQER      | 3694.8532 | IPI0033131€ | IPI0033131€ | yes | no  | 3,4   | 8.3657E-06    | 102.21 |
| I(de)VYIEHNIEKNSTKEEIIAAIEK             | 2796.5273 | IPI0032119C | IPI0032119C | yes | no  | 2,3   | 2.9093E-117   | 284.07 |
| I(de)VYIEHNIEKNSTK                      | 1799.9781 | IPI0032119C | IPI0032119C | yes | no  |       | 2 2.8042E-07  | 174.39 |
| HYPGWVSMANAGKDTN(de)GSQFFITTVK          | 2912.3916 | IPI0013568€ | IPI0013568€ | yes | yes |       | 3 0.0001557   | 104.67 |
| HYAN(de)ITNGMYR                         | 1338.6139 | IPI0022407€ | IPI0022407€ | yes | no  | 2,3   | 0.0030532     | 124.12 |
| HVVIN(de)GSSFGADGFPYVQVIK               | 2233.1532 | IPI00742377 | IPI00742377 | yes | no  |       | 3 0.0008199   | 105.89 |
| HVTDMN(de)STIHIR                        | 1535.7878 | IPI0022344€ | IPI0022344€ | yes | yes | 2,3   | 0.0010595     | 148.62 |
| HVGDIGN(de)VTAGKDGVANVSIEDR             | 2322.1564 | IPI0013058€ | IPI0013058€ | yes | yes | 2,3   | 3.7589E-06    | 141.08 |
| HVEDKFN(de)ETTQR                        | 1502.7114 | IPI00130654 | IPI00130654 | yes | no  | 2,3   | 0.0033461     | 122.33 |
| HVCPVENWSYN(de)ESCPDPAEQGGPK            | 2843.1915 | IPI0012826€ | IPI0012826€ | yes | yes |       | 3 1.0678E-07  | 163.95 |
| HTIEIAPN(de)STAR                        | 1308.6786 | IPI0062080C | IPI0062080C | yes | no  |       | 2 0.0079292   | 101.89 |
| HTDDITSIN(de)NTIVNIR                    | 1824.933  | IPI00129304 | IPI00129304 | yes | yes | 2,3   | 3.538E-77     | 256.98 |
| HSVIWNAMIHPIQN(de)MTIK                  | 2132.1023 | IPI00111794 | IPI00111794 | yes | no  | 2,3   | 0.0001577     | 159.22 |
| HSQQPIITYEKYN(de)VTDTPK                 | 2261.1328 | IPI0032241€ | IPI0032241€ | yes | yes | 2,3   | 1.3844E-19    | 211.89 |
| HSIEHFNN(de)NTDHSIFTIR                  | 2318.0941 | IPI0011495€ | IPI0011495€ | yes | no  | 2,3,4 | 5.4827E-11€   | 278.4  |
| HPGNFSSISCDYFAVN(de)QSR                 | 2184.9647 | IPI0011597€ | IPI0011597€ | yes | yes | 2,3   | 0.0005761     | 160.47 |
| HPGN(de)FSSISCDYFAVNQSR                 | 2184.9647 | IPI0011597€ | IPI0011597€ | yes | yes | 2,3   | 0.0005761     | 160.47 |
| HNN(de)DTQHIWESDSNEFSVIADPR             | 2710.2008 | IPI0012952€ | IPI0012952€ | yes | no  | 2,3,4 | 1.2347E-64    | 243.99 |
| HN(de)QSCWCQTIAVR                       | 1787.7832 | IPI0033084€ | IPI0033084€ | yes | yes |       | 2 0.0013099   | 133.25 |
| HN(de)ITITQGK                           | 1010.5509 | IPI0012835€ | IPI0012835€ | yes | no  |       | 2 0.0082428   | 136.96 |
| HMN(de)SSEQAHTATMIIDTIEEGAFVIADNIIIEPTR | 3753.7978 | IPI0087655€ | IPI0087655€ | yes | no  |       | 4 0.0016551   | 57.347 |
| HIVFWN(de)SSNPK                         | 1327.6673 | IPI00130752 | IPI00130752 | yes | no  |       | 2 0.011303    | 103.34 |
| HISN(de)DTTPESTMTVGQAR                  | 2044.9484 | IPI0087630€ | IPI0087630€ | yes | yes |       | 3 0.0010949   | 114.29 |
| HISFGEDYPGIVNPIDHTN(de)VTAPQASMMFQYFVK  | 3852.828  | IPI00132454 | IPI00132454 | yes | no  | 3,4   | 3.8184E-20    | 143.19 |
| HIN(de)ITTSVAGGFR                       | 1484.81   | IPI0085041€ | IPI0085041€ | yes | yes | 2,3   | 4.9947E-29    | 216.54 |
| HIN(de)ASNPSEPATIIIFTAAR                | 2009.033  | IPI00421157 | IPI00421157 | yes | yes | 2,3   | 2.8416E-95    | 273.46 |
| HIIEN(de)ATASVSEAEK                     | 1753.8959 | IPI0039684C | IPI0039684C | yes | no  | 2,3   | 8.2947E-20    | 211.7  |
| HIIEN(de)ATASVSEAEK                     | 1625.8009 | IPI0039684C | IPI0039684C | yes | no  | 2,3   | 4.2016E-39    | 232.78 |
| HHAAYVNNIN(de)ATEEKYHEAIAK              | 2522.2302 | IPI0010910€ | IPI0010910€ | yes | yes |       | 3 1.7522E-13  | 193.8  |
| HGQIIKN(de)FTIIQGGPPGPR                 | 1972.1007 | IPI00129304 | IPI00129304 | yes | yes |       | 3 0.0004057   | 142.54 |
| HGNIYDIKPIGIN(de)DTIVSVGEYTYIR          | 3112.587  | IPI00308971 | IPI00308971 | yes | yes |       | 3 3.4413E-06  | 103.03 |
| HGHFTGFN(de)GSTIR                       | 1429.6851 | IPI0011798€ | IPI0011798€ | yes | yes | 2,3   | 0.010956      | 98.337 |
| HGFYCYIIGSTISTFTDAN(de)HTCTNEK          | 3036.3382 | IPI0012618€ | IPI0012618€ | yes | yes |       | 3 4.1945E-56  | 243.23 |
| HFKGQTQN(de)YSTIIIEASER                 | 2350.1553 | IPI0012466€ | IPI0012466€ | yes | no  |       | 3 3.0078E-19  | 208.49 |
| HFFN(de)VSDEIAIVTIVK                    | 1830.988  | IPI00466371 | IPI01026704 | no  | no  |       | 2 0.021426    | 86.005 |
| HEEGHMINC(de)TCFGQGR                    | 1931.7825 | IPI0011353€ | IPI0011353€ | yes | no  | 2,3   | 0.001633      | 128.76 |
| HDYIIIPEGAITN(de)TTR                    | 1812.937  | IPI00121421 | IPI00121421 | yes | no  |       | 2 0.0080354   | 100.43 |
| HAN(de)WTITPIK                          | 1179.64   | IPI0031735€ | IPI0031735€ | yes | yes |       | 2 0.0072407   | 127.42 |
| HAEISFVFITDGVVTGN(de)DSIEESVHSMR        | 2976.3924 | IPI00621027 | IPI00621027 | yes | yes |       | 3 8.2429E-24  | 174.19 |
| GYN(de)SSQDIPSIVDFVK                    | 1880.952  | IPI0012466€ | IPI0012466€ | yes | yes |       | 2 7.6783E-134 | 294.05 |
| GYITSFEMFN(de)STFK                      | 1670.765  | IPI00262024 | IPI00262024 | yes | no  |       | 2 2.7394E-78  | 259.1  |
| GYIITINFTKN(de)TTR                      | 1640.8886 | IPI0046921€ | IPI0046921€ | yes | yes |       | 2 5.1472E-114 | 283.82 |



|                                               |           |             |             |     |     |     |   |            |        |
|-----------------------------------------------|-----------|-------------|-------------|-----|-----|-----|---|------------|--------|
| GYIITIN(de)FTKNTTR                            | 1640.8886 | IPI0046921E | IPI0046921E | yes | yes |     | 2 | 5.1472E-11 | 283.82 |
| GYIITIN(de)FTK                                | 1168.6492 | IPI0046921E | IPI0046921E | yes | yes |     | 2 | 2.3906E-31 | 218.49 |
| GWIN(de)GSIVGFYK                              | 1339.6925 | IPI0013458E | IPI0013458E | yes | no  |     | 2 | 5.3258E-19 | 197.07 |
| GVTSVSQIFHSPDIAIRDTYVN(de)ASQSIYGSSPR         | 3551.7645 | IPI00122977 | IPI00122977 | yes | no  | 3,4 | 1 | 1.2937E-09 | 106.28 |
| GVTNDIISVQGNTGPSWIN(de)KTEK                   | 2457.25   | IPI0034468E | IPI0034468E | yes | yes | 2,3 | 8 | 2.4442E-07 | 142.23 |
| GVTHIN(de)ISGIKMPR                            | 1521.845  | IPI0011906E | IPI0011906E | yes | yes |     | 2 | 0.044569   | 119.62 |
| GVTHIN(de)ISGIK                               | 1137.6506 | IPI0011906E | IPI0011906E | yes | yes | 2,3 | 0 | 0.000838   | 153.74 |
| GVSSSEN(de)FTSPVMEFWERR                       | 2244.027  | IPI0046665E | IPI0046665E | yes | no  |     | 3 | 0.0022583  | 112.17 |
| GVSSSEN(de)FTSPVMEFWER                        | 2087.9259 | IPI0046665E | IPI0046665E | yes | no  | 2,3 | 9 | 7.201E-09  | 191.47 |
| GVQIIVFPEDGIHGFN(de)FTR                       | 2145.1007 | IPI0032137E | IPI0032137E | yes | no  | 2,3 | 7 | 9.059E-38  | 231.77 |
| GVN(de)VTMPSQPGVPPISSTQIQIDPAIQEFQIVDISRR     | 4017.0994 | IPI0051536C | IPI0051536C | yes | no  |     | 4 | 0.017353   | 49.069 |
| GVN(de)VTMPSQPGVPPISSTQIQIDPAIQEFQIVDISR      | 3860.9982 | IPI0051536C | IPI0051536C | yes | no  |     | 3 | 4.5245E-26 | 139.85 |
| GVIPGEDWTVFQSN(de)HSTYEPVIAK                  | 2786.3915 | IPI0040418E | IPI0040418E | yes | no  | 2,3 | 0 | 0.0003726  | 92.01  |
| GVIMVGN(de)ETTYEDGHGARKNITDIVEGAK             | 3073.5139 | IPI0064918E | IPI0064918E | yes | no  |     | 3 | 1.0093E-07 | 118.37 |
| GVIMVGN(de)ETTYEDGHGAR                        | 1904.8687 | IPI0064918E | IPI0064918E | yes | no  | 2,3 | 0 | 0.0009472  | 137.73 |
| GVHFSPAASGITTSTVQVQGIPEYAN(de)YTFTVK          | 3369.6881 | IPI0012022E | IPI0012022E | yes | yes |     | 3 | 0.0016935  | 61.538 |
| GVFITNE(de)TGQPIIGK                           | 1572.8512 | IPI0011196C | IPI0011196C | yes | no  |     | 2 | 2.8561E-11 | 192.65 |
| GVENDVFIRYPNN(de)GSIVWVK                      | 2263.1386 | IPI0084869E | IPI0084869E | yes | yes | 2,3 | 0 | 0.0004051  | 135.49 |
| GVDSCHGDSGGAFQVFN(de)VTVPK                    | 2445.1383 | IPI0065367E | IPI0065367E | yes | no  |     | 3 | 0.0027611  | 79.942 |
| GVAVTN(de)TSQIGFR                             | 1348.7099 | IPI0047108E | IPI0047108E | yes | no  |     | 2 | 2.0001E-44 | 204.85 |
| GV(de)IMVGNETTYEDGHGARKNITDIVEGAK             | 3073.5139 | IPI0064918E | IPI0064918E | yes | no  |     | 3 | 1.0093E-07 | 118.37 |
| GTFTDCAIANM(de)TQQIR                          | 1825.8451 | IPI00621027 | IPI00621027 | yes | no  |     | 2 | 5.2499E-94 | 268.61 |
| GTDPSPSPAPATPPAPGAEISYIN(de)HTFR              | 2950.4461 | IPI00762091 | IPI00762091 | yes | yes |     | 3 | 0.0001354  | 79.177 |
| GTCEQGSPSIVTPPKDIWN(de)VTGAK                  | 2454.2213 | IPI00652107 | IPI00652107 | yes | no  |     | 3 | 6.245E-05  | 114.4  |
| GTAGNAIMDGASQIVGEN(de)R                       | 1859.8796 | IPI0027907E | IPI0027907E | yes | yes | 2,3 | 1 | 1.2498E-94 | 269.61 |
| GSTQYIENIGFN(de)MSK                           | 1687.7876 | IPI0011610E | IPI0011610E | yes | yes |     | 2 | 1.6845E-05 | 156    |
| GSPGN(de)ASQGSIIHSPQIAIQADPR                  | 2537.2735 | IPI00114044 | IPI00114044 | yes | yes | 2,3 | 0 | 0.0001846  | 106    |
| GSNFN(de)ISKTDNIEECQK                         | 1982.9004 | IPI00113057 | IPI00113057 | yes | yes | 2,3 | 5 | 6.394E-08  | 184    |
| GSNFN(de)ISK                                  | 865.42938 | IPI00113057 | IPI00113057 | yes | yes |     | 2 | 0.017251   | 140.45 |
| GSN(de)FTAICVIK                               | 1208.6223 | IPI0012015E | IPI0012015E | yes | yes |     | 2 | 0.001262   | 142.97 |
| GSIQSANDISSQTQGFQHSMDN(de)ISAQIQTVR           | 3460.6641 | IPI00330594 | IPI00330594 | yes | yes | 3,4 | 8 | 7.53E-36   | 205.12 |
| GSIN(de)VSYNIGPGFTGSEYSR                      | 2103.9861 | IPI0011304E | IPI0011304E | yes | no  |     | 2 | 0.0004992  | 113.51 |
| GSEVEDEDIEIFN(de)TSVQIRPPSTAPGPETAALIER       | 3800.8381 | IPI00381357 | IPI00381357 | yes | no  | 3,4 | 5 | 1.388E-30  | 202.58 |
| GSAIPHPN(de)ATWEIK                            | 1606.8104 | IPI0011929E | IPI0011929E | yes | no  |     | 2 | 0.01801    | 90.725 |
| GQTQNYST(de)IIIEEASER                         | 1937.933  | IPI0012466E | IPI0012466E | yes | no  | 2,3 | 8 | 9.989E-49  | 239.75 |
| GQTGIGFIYASGIVN(de)SSQAK                      | 2054.0433 | IPI0013114E | IPI0013114E | yes | no  | 2,3 | 1 | 1.3552E-49 | 236.96 |
| GQAQSDAAGIPGAESRN(de)DSIPGAGSEADGIEGK         | 3111.4341 | IPI00317487 | IPI00317487 | yes | yes |     | 3 | 1.0861E-09 | 107.31 |
| GPNIKQC(de)VDGNWTTIPVCIEEER                   | 2714.2792 | IPI0013001C | IPI0013001C | yes | no  |     | 3 | 0.0019986  | 98.543 |
| GPIANPIWN(de)VTGFTGR                          | 1698.8842 | IPI0012304C | IPI0012304C | yes | no  |     | 2 | 0.0027011  | 114.63 |
| GPDISN(de)CTSHWVNQIAQK                        | 2053.964  | IPI0087655E | IPI0087655E | yes | no  |     | 2 | 0.0012405  | 119.8  |
| GPDGTEGISSTVN(de)GSTDPSAVTDIR                 | 2432.1303 | IPI0046942E | IPI0046942E | yes | no  |     | 2 | 7.6588E-08 | 166.65 |
| GPCSHICIINYN(de)R                             | 1602.7395 | IPI0011906E | IPI0011906E | yes | yes |     | 2 | 3.7325E-33 | 223.31 |
| GNYGWQAGN(de)HSAFWGMTIDEGIR                   | 2566.1448 | IPI0011545E | IPI0011545E | yes | no  |     | 3 | 1.4865E-06 | 160.67 |
| GNYDFVEAMIVNN(de)HTSIDVER                     | 2422.1223 | IPI0040358E | IPI0040358E | yes | yes | 2,3 | 0 | 0.000188   | 155.79 |
| GN(de)TTAIDKEIAR                              | 1287.6783 | IPI0010853E | IPI0010853E | no  | no  | 2,3 | 5 | 3.103E-14  | 188.48 |
| GN(de)SSIYPVSPSIQQIVIEK                       | 2157.1681 | IPI0098598E | IPI0098598E | yes | no  |     | 2 | 0.0015408  | 101.53 |
| GN(de)QSSQWIYEAMAK                            | 1611.7351 | IPI0013779E | IPI0013779E | yes | yes |     | 2 | 0.0019953  | 121.13 |
| GN(de)ITEYQCHQYITK                            | 1753.8094 | IPI0012239E | IPI0012239E | yes | no  |     | 2 | 3.5213E-08 | 178.23 |
| GN(de)ISTEKFEVIEIK                            | 1492.7773 | IPI00466371 | IPI01026704 | no  | no  |     | 2 | 0.010161   | 107.65 |
| GN(de)HSIFGIEVATIGQGPDPCPSVNER                | 2653.2555 | IPI0045943E | IPI0045943E | yes | yes |     | 3 | 6.0263E-18 | 201.13 |
| GN(de)GSCVCHAGWQGIR                           | 1657.7202 | IPI0098726E | IPI0098726E | yes | no  |     | 2 | 0.0083406  | 101.62 |
| GMVIDENSNN(de)ITGAVISVTGINHDVTSGEHGDYFR       | 3717.7329 | IPI0012826C | IPI0012826C | yes | yes |     | 3 | 8.0817E-19 | 141.23 |
| GMNYN(de)SSVVK                                | 1097.5175 | IPI0041628E | IPI0041628E | yes | yes |     | 2 | 0.022949   | 104.79 |
| GKNN(de)QTECFNHVR                             | 1602.7321 | IPI0012466E | IPI0012466E | yes | no  |     | 2 | 0.0024436  | 139.48 |
| GKIYWTGDGNISMANMDG(de)SNHTIIFSGQK             | 3199.4703 | IPI0011906E | IPI0011906E | yes | yes |     | 3 | 1.0612E-12 | 146.5  |
| GKIYWTGDG(de)DNISMANMDGSNHTIIFSGQK            | 3199.4703 | IPI0011906E | IPI0011906E | yes | yes |     | 3 | 1.0612E-12 | 146.5  |
| GIWKIPFSPENTREED(de)FYVNETSTVK                | 3085.5033 | IPI0011610E | IPI0011610E | yes | yes |     | 3 | 0.0045894  | 77.287 |
| GIVSGGVYNSHVGCIPYTIPPCHEHVN(de)GSRPPCTGEGDTPR | 4430.0379 | IPI00113517 | IPI00113517 | yes | yes |     | 4 | 0.0002026  | 54.596 |
| GIVIGPI(de)HKNQKDEINETDIK                     | 2360.27   | IPI0093088E | IPI0093088E | yes | no  |     | 3 | 0.014684   | 93.371 |
| GISYQIIGN(de)HSK                              | 1315.6884 | IPI00623114 | IPI00623114 | yes | no  |     | 2 | 0.0013357  | 128.68 |
| GISPGN(de)YSVR                                | 1048.5302 | IPI0012835E | IPI0012835E | yes | no  |     | 2 | 0.012091   | 113.69 |
| GIRGPN(de)FTSPASITFTTGKPPQDIEAK               | 2942.5502 | IPI0045841E | IPI0045841E | yes | no  |     | 3 | 0.011806   | 67.33  |
| GINIT(de)EDTYKPR                              | 1405.7201 | IPI0011980E | IPI0011980E | yes | yes |     | 2 | 1.086E-32  | 219.43 |
| GIMVGN(de)GSVIGVVQAVDAETGK                    | 2100.0885 | IPI0034215E | IPI0034215E | yes | no  | 2,3 | 5 | 2.73E-297  | 353.39 |
| GIMIIN(de)DTQHFSNNVKGIEGQFYR                  | 2893.4545 | IPI00312711 | IPI00312711 | yes | no  |     | 3 | 0.000488   | 104.03 |
| GIMIIN(de)DTQHFSNNVK                          | 1942.9935 | IPI00312711 | IPI00312711 | yes | no  | 2,3 | 6 | 3.743E-79  | 264.03 |
| GIIN(de)ATISVAEINHPVTTYK                      | 2140.1528 | IPI0013057E | IPI0013057E | yes | yes | 2,3 | 0 | 0.0005     | 113.49 |
| GIIGISN(de)ATYWHIPDTAYPGIYR                   | 2690.3857 | IPI00458077 | IPI00458077 | yes | yes |     | 3 | 6.6605E-10 | 183.74 |
| GIFPDGSHEISGN(de)TSITPDK                      | 2070.9858 | IPI0089497E | IPI0089497E | yes | no  |     | 2 | 0.0004922  | 113.73 |
| GIAN(de)ISNFIR                                | 1103.6087 | IPI0012915E | IPI0012915E | yes | no  |     | 2 | 0.0003283  | 169.93 |
| GIAEVTEN(de)VTEGGVTK                          | 1602.8101 | IPI00130271 | IPI00130271 | yes | no  |     | 2 | 4.7846E-49 | 239.58 |
| GHVDPAN(de)DTFDIDPR                           | 1667.754  | IPI00453501 | IPI00453501 | yes | no  | 2,3 | 0 | 0.0026862  | 115.12 |
| GHTDRCDEAQAIQVWN(de)DTHPEVISQKPFDK            | 3520.643  | IPI0010800E | IPI0010800E | yes | no  |     | 4 | 0.0095992  | 64.845 |
| GHIIAQVATNPQGITGTGN(de)TTSEMDPShRK            | 3230.6102 | IPI0032137E | IPI0032137E | yes | no  | 3,4 | 1 | 1.661E-13  | 143.47 |
| GHIIAQVATNPQGITGTGN(de)TTSEMDPShR             | 3102.5153 | IPI0032137E | IPI0032137E | yes | no  | 3,4 | 3 | 3.9209E-13 | 165.47 |
| GHCIN(de)QTQNIQSSK                            | 1613.758  | IPI0098788E | IPI0098788E | yes | yes |     | 2 | 0.0010779  | 137.46 |
| GHFYNN(de)ISDVR                               | 1369.6415 | IPI0013556C | IPI0013556C | yes | no  |     | 2 | 0.0073012  | 110.08 |
| GHAIGISCQSEN(de)GTAPITYHIMK                   | 2484.189  | IPI00406901 | IPI00406901 | yes | no  |     | 3 | 2.4991E-06 | 135.81 |
| GHAHIAIVNHDSYN(de)FSHR                        | 2145.0253 | IPI0013336E | IPI0013336E | yes | no  |     | 3 | 4.0181E-21 | 213.51 |
| GGIN(de)ITAVTVTAENDHTVAFIGTSDGR               | 2715.3464 | IPI0040574E | IPI0040574E | yes | no  |     | 3 | 0.0001083  | 98.121 |
| GFQWVTGDN(de)HTSYSR                           | 1753.7808 | IPI0012942E | IPI0012942E | yes | yes |     | 2 | 1.2076E-06 | 166.04 |
| GFN(de)ATYHVR                                 | 1063.5199 | IPI0041102E | IPI0041102E | yes | yes |     | 2 | 0.01597    | 123.86 |
| GFGVAFVGN(de)YTGSIPNEAAINTVR                  | 2453.2339 | IPI00165807 | IPI00165807 | yes | no  |     | 3 | 2.0188E-06 | 127.49 |
| GENPSQYGITAFNHPIN(de)ITK                      | 2200.0913 | IPI00112614 | IPI00112614 | yes | yes | 2,3 | 0 | 0.0002383  | 125.79 |
| GEIQSEN(de)SSITISSNR                          | 1807.8548 | IPI00466371 | IPI01026704 | no  | no  | 2,3 | 1 | 1.3699E-13 | 287.57 |
| GEIN(de)STIFSSRPK                             | 1434.7467 | IPI0046006E | IPI0046006E | yes | no  | 2,3 | 5 | 9.797E-18  | 197.36 |

|                                                 |           |             |             |     |     |       |            |        |
|-------------------------------------------------|-----------|-------------|-------------|-----|-----|-------|------------|--------|
| GECYYTN(de)GTQR                                 | 1347.5514 | IPI0011091C | IPI0011091C | yes | no  | 2     | 0.032818   | 88.338 |
| GDTVARIHEFYDDN(de)NTWGIDR                       | 2703.2677 | IPI0084869C | IPI0084869C | yes | yes | 3     | 0.0009967  | 98.443 |
| GDTHTQIEGIQFN(de)ITQTSEADHDK                    | 2795.3726 | IPI00123924 | IPI00406302 | no  | no  | 3,4   | 2.8473E-12 | 281.29 |
| GDPSIISVN(de)GTDFTFR                            | 1724.837  | IPI00463492 | IPI00463492 | yes | yes | 2     | 7.9916E-09 | 188.44 |
| GDN(de)QSPIEHTK                                 | 1337.6575 | IPI0022189C | IPI0022189C | yes | yes | 2     | 4.1772E-14 | 190.85 |
| GDHHQISHYN(de)ITGVR                             | 1732.8394 | IPI0033820E | IPI0033820E | yes | no  | 2,3   | 1.2864E-06 | 165.49 |
| GDGPFTVFPHADIIISN(de)MSQDEIAR                   | 2715.2963 | IPI0098726E | IPI0098726E | yes | no  | 3     | 1.4932E-05 | 112.36 |
| GDEKENITA(de)EAIDISIK                           | 1844.9367 | IPI0012472E | IPI0012472E | yes | no  | 2,3   | 6.0486E-05 | 172.66 |
| GDDIYTNV(de)TVSIVEAIVGFEMDITHIDGHK              | 3287.602  | IPI00320241 | IPI00320241 | yes | yes | 4     | 5.7831E-12 | 129.43 |
| GCKDNA(de)TDSVPIR                               | 1431.6776 | IPI0011906C | IPI0011906C | yes | yes | 2,3   | 0.0027502  | 126.71 |
| GCADYCNQ(de)TITKR                               | 1585.6977 | IPI0098726E | IPI0098726E | yes | no  | 2     | 1.6376E-13 | 183.89 |
| GAIQIPTVSFSHEESN(de)TTAIAEFGEYIRK               | 3194.5884 | IPI0022407C | IPI0022407C | yes | yes | 3,4   | 6.1023E-06 | 102.21 |
| GAIQIPTVSFSHEESN(de)TTAIAEFGEYIR                | 3066.4934 | IPI0022407C | IPI0022407C | yes | yes | 3     | 1.8588E-11 | 140.2  |
| GAIDIMIQVN(de)MTPGHSSAPPK                       | 2163.0816 | IPI0022407C | IPI0022407C | yes | yes | 2,3   | 3.517E-05  | 171.13 |
| GAGEVSPAESHSSKPTN(de)ISAK                       | 1965.9756 | IPI0023071E | IPI0023071E | yes | no  | 2,3   | 0.0019479  | 104.03 |
| GAFVSKNPCN(de)ITREDYAPIVK                       | 2378.2053 | IPI0030796E | IPI0030796E | yes | yes | 2,3   | 0.0002096  | 147.09 |
| GAFVSKNPCN(de)ITR                               | 1462.7351 | IPI0030796E | IPI0030796E | yes | yes | 2     | 0.016163   | 100.55 |
| GAFISN(de)FTMTVNGMTFTSSIK                       | 2253.081  | IPI0097043E | IPI0097043E | yes | no  | 2     | 6.3921E-05 | 153.36 |
| GAFFPIKEDN(de)WSIPNR                            | 1889.9424 | IPI0013556C | IPI0013556C | yes | no  | 2     | 0.0063655  | 111.22 |
| GAAAPSAPHWN(de)ETAEK                            | 1635.7641 | IPI0064828E | IPI0064828E | yes | no  | 2     | 0.0014947  | 130.27 |
| FVPNSNMN(de)FTGQAYSGR                           | 1888.8526 | IPI0010853E | IPI0010853E | no  | no  | 2,3   | 4.5244E-05 | 166.57 |
| FVN(de)STGYITEAEK                               | 1457.7038 | IPI00153187 | IPI00153187 | yes | yes | 2     | 6.363E-06  | 165.34 |
| FVHVN(de)TSAIK                                  | 1227.6976 | IPI0015363C | IPI0015363C | yes | yes | 2     | 0.020574   | 95.477 |
| FTQDAYSAVVKEN(de)STEAR                          | 2014.9596 | IPI00623114 | IPI00623114 | yes | no  | 2,3   | 0.0025848  | 132.79 |
| FTIKPIGIIIQISGDIEDIEPAIN(de)K                   | 2883.5997 | IPI0016573C | IPI0016573C | yes | no  | 3     | 2.2674E-18 | 167.61 |
| FTFTSHTPGEHQICIHSN(de)STK                       | 2428.123  | IPI0047368C | IPI0047368C | yes | no  | 2,3   | 6.7924E-14 | 202.16 |
| FTFTSHTPGDHQICIHSN(de)STR                       | 2442.1135 | IPI0015346E | IPI0015346E | yes | no  | 2,3   | 7.1542E-28 | 216.3  |
| FTECCHEERPIN(de)TSAIK                           | 2090.9514 | IPI0087623C | IPI0087623C | yes | no  | 2,3   | 0.0033617  | 130.01 |
| FTCN(de)QTTDVIHHSK                              | 1775.8876 | IPI0031950E | IPI0031950E | yes | yes | 2,3   | 4.7202E-13 | 287.85 |
| FTAPDTIFAN(de)GSVYPPNEGFCPCR                    | 2716.205  | IPI01008227 | IPI01008227 | yes | no  | 2,3   | 7.3806E-07 | 168.68 |
| FSWNNITNSIDIANISADFQGRPVDDPTGAFAN(de)GSITFK     | 4200.0189 | IPI0045943C | IPI0045943C | yes | yes | 4     | 3.2872E-17 | 119.54 |
| FSWNN(de)ITNSIDIANISADFQGRPVDDPTGAFANGSITFK     | 4200.0189 | IPI0045943C | IPI0045943C | yes | yes | 4     | 3.2872E-17 | 119.54 |
| FSVN(de)QTTIITHEK                               | 1516.7886 | IPI0084869C | IPI0084869C | yes | yes | 2     | 3.9486E-10 | 181.67 |
| FSTEIGYN(de)GTR                                 | 1243.5833 | IPI0013401C | IPI0013401C | yes | yes | 2     | 6.2661E-08 | 180.24 |
| FSPPVVN(de)VTWIR                                | 1413.7769 | IPI0011080E | IPI0011080E | yes | no  | 2     | 0.017381   | 92.856 |
| FMSDITYDIQDVIADVGIKIDFTN(de)QSDFADTTKDTPIITVIHK | 4918.411  | IPI0011610E | IPI0011610E | yes | yes | 4,5   | 2.9972E-22 | 111.67 |
| FMSDITYDIQDVIADVGIKIDFTN(de)QSDFADTTK           | 3699.7138 | IPI0011610E | IPI0011610E | yes | no  | 3     | 7.8521E-45 | 220.98 |
| FSHN(de)GTCAAEGK                                | 1277.5459 | IPI0032067E | IPI0032067E | yes | yes | 2     | 0.0032488  | 117.2  |
| FSEIIVNN(de)ATEEIIVK                            | 1817.9775 | IPI0032119C | IPI0032119C | yes | no  | 2     | 0.0014197  | 128.64 |
| FSEIATVHN(de)HSIPK                              | 1578.8154 | IPI00124697 | IPI00124697 | yes | no  | 2     | 1.9259E-06 | 163.99 |
| FSDGIESN(de)RSTHFVVK                            | 1851.8751 | IPI00131091 | IPI00131091 | yes | no  | 2,3   | 0.0026671  | 120.87 |
| FSDGIESN(de)R                                   | 1023.4621 | IPI00131091 | IPI00131091 | yes | no  | 2     | 0.0056377  | 145.25 |
| FSATEVPEKGEVSP(de)AEHSSKPTNISAK                 | 2954.4621 | IPI0023071E | IPI0023071E | yes | no  | 3,4   | 1.1893E-11 | 153.52 |
| FQSAAGAIQEAASEAYIVGIFEDTN(de)ICAIHAK            | 3436.6973 | IPI0098957E | IPI0098957E | yes | no  | 3     | 0.030568   | 50.593 |
| FQN(de)FSMATDQR                                 | 1343.5928 | IPI0012817E | IPI0012817E | yes | no  | 2     | 1.6115E-05 | 169.89 |
| FQISPIQFSPEEVIGMVIN(de)YSR                      | 2681.3523 | IPI0012334C | IPI0012334C | yes | no  | 2,3   | 2.6155E-65 | 252.1  |
| FQIIN(de)FSSSEIK                                | 1411.7347 | IPI0085672C | IPI0085672C | yes | no  | 2     | 2.4302E-08 | 182.89 |
| FPVPFQKENV(de)TATIVEIGR                         | 2144.163  | IPI00134691 | IPI00134691 | yes | yes | 2,3   | 5.9878E-19 | 206.21 |
| FN(de)VSIIYGR                                   | 1067.5764 | IPI0032067E | IPI0032067E | yes | yes | 2     | 0.0069093  | 140.49 |
| FN(de)STEYQVVTR                                 | 1342.6517 | IPI0011906C | IPI0011906C | yes | no  | 2     | 3.2107E-33 | 214    |
| FN(de)ITETPEADHQQFGNIIQISQPEDQDQINIGNAMFIEK     | 4601.202  | IPI0013183C | IPI0013183C | yes | no  | 4     | 2.8791E-12 | 84.787 |
| FN(de)ISIQK                                     | 848.4756  | IPI0079846E | IPI0079846E | yes | no  | 2     | 0.030988   | 114.5  |
| FN(de)GSVSFFR                                   | 1059.5138 | IPI0055116E | IPI0055116E | yes | no  | 2     | 0.0023326  | 147.74 |
| FN(de)ETRDTITSIVSDINVR                          | 2079.0596 | IPI0099093C | IPI0099093C | yes | yes | 3     | 0.0020767  | 127.29 |
| FN(de)ETIHR                                     | 915.45626 | IPI00471081 | IPI00471081 | yes | yes | 2     | 0.030364   | 136.8  |
| FN(de)DTEVIQR                                   | 1120.5513 | IPI0032137E | IPI0032137E | yes | no  | 2     | 0.02577    | 110.39 |
| FMGIPTKDDNIEHYKN(de)STVMAR                      | 2566.2308 | IPI0012392E | IPI0012392E | yes | no  | 3     | 0.0094112  | 81.854 |
| FKDNTPNAN(de)ATER                               | 1476.6957 | IPI0012513E | IPI0012513E | yes | no  | 2     | 0.019233   | 98.592 |
| FIWSEPQN(de)CSATK                               | 1566.7137 | IPI00118987 | IPI00118987 | yes | no  | 2     | 0.0057294  | 107.46 |
| FISYN(de)VTR                                    | 998.51853 | IPI00453707 | IPI00453707 | yes | yes | 2     | 0.026205   | 113.18 |
| FIQSAEFFN(de)YTVR                               | 1620.7936 | IPI0012740E | IPI0012740E | yes | yes | 2,3   | 9.4335E-20 | 203.32 |
| FINYN(de)QTVSR                                  | 1240.62   | IPI0022693C | IPI0022693C | yes | no  | 2     | 2.4589E-22 | 209.97 |
| FINFFVGNTIN(de)SSYPPGYSIHSISVR                  | 2915.4606 | IPI0013042C | IPI0013042C | yes | no  | 3     | 0.0002375  | 92.932 |
| FIN(de)ISSTGIR                                  | 1106.6084 | IPI0013189E | IPI0013189E | yes | yes | 2     | 0.0093069  | 122.7  |
| FIKGNPN(de)KIQCVDGNWTTIPVCIEEER                 | 3215.6107 | IPI0013001C | IPI0013001C | yes | no  | 3     | 5.8774E-05 | 89.201 |
| FIHVSHIN(de)ASMK                                | 1382.7129 | IPI0012021C | IPI0012021C | yes | yes | 2     | 0.0090991  | 122.39 |
| FIGITPFIN(de)YTR                                | 1440.7765 | IPI0032372E | IPI0032372E | yes | yes | 2     | 0.016961   | 93.258 |
| FIEYVTSECHFYN(de)GTQHVR                         | 2386.0801 | IPI0047458C | IPI0047458C | yes | no  | 3     | 0.0003568  | 166.35 |
| FIEAGIYEVPIIITDSGNPPKSNIS(de)IIR                | 3055.6594 | IPI00323134 | IPI00323134 | yes | no  | 3,4   | 3.4331E-11 | 139.51 |
| FHVNY(de)TQPIVAVK                               | 1514.8245 | IPI00123704 | IPI00123704 | yes | no  | 2     | 0.0050832  | 109.44 |
| FHVHQPVTQPFIVQTN(de)TTVK                        | 2320.2328 | IPI00658311 | IPI00658311 | yes | no  | 2,3,4 | 3.6101E-40 | 233.79 |
| FHSDINI(de)SESIIPAVIEK                          | 2011.0626 | IPI00831484 | IPI00831484 | yes | yes | 2,3   | 1.4907E-05 | 178.75 |
| FGYIIHTDN(de)R                                  | 1234.6095 | IPI0047520E | IPI0047520E | yes | no  | 2     | 0.0016929  | 148.32 |
| FGTCSQICN(de)NTK                                | 1428.6126 | IPI0011906C | IPI0011906C | yes | yes | 2     | 2.4701E-14 | 189.3  |
| FGN(de)ETFIHIDNGR                               | 1631.8056 | IPI0017035E | IPI0017035E | yes | yes | 2     | 0.0022241  | 119.31 |
| FGHSPIIN(de)ITGGISHASDVVIYHQHKQPEVTNPNCDR       | 4022.981  | IPI0011906C | IPI0011906C | yes | yes | 4     | 0.031955   | 45.748 |
| FGHSPIIN(de)ITGGISHASDVVIYHQHK                  | 2826.4565 | IPI0011906C | IPI0011906C | yes | yes | 3,4,5 | 4.8866E-08 | 153.36 |
| FGFEGN(de)YSIIVQHASSGANK                        | 2125.0229 | IPI0031748E | IPI0031748E | yes | no  | 2,3   | 6.8982E-11 | 280.81 |
| FFQAFTKN(de)GSGATIPGAGANVQTIR                   | 2552.3136 | IPI00223231 | IPI00223231 | yes | no  | 3     | 0.0012466  | 82.267 |
| FFN(de)FSWR                                     | 1002.4712 | IPI0039684C | IPI0039684C | yes | no  | 2     | 0.020216   | 144.38 |
| FFN(de)DSIVDPVDSEWFGFYR                         | 2339.0535 | IPI0033131E | IPI0033131E | yes | no  | 2,3   | 1.8674E-77 | 257.2  |
| FDGEPDQSQIN(de)ITWFIK                           | 2068.9564 | IPI0062526C | IPI0062526C | yes | no  | 2     | 0.0037056  | 109.36 |
| FDEFFSQGCAPGYEKN(de)STICDICIGPIK                | 3252.4566 | IPI00987951 | IPI00987951 | yes | no  | 3,4   | 1.9908E-14 | 190.85 |
| FDAAGTSVHGGVPQN(de)GSICAHIPMIK                  | 2663.2948 | IPI0031553E | IPI0031553E | yes | yes | 3     | 3.7265E-08 | 161.02 |
| FCNIVPTEHCFIGN(de)GTEYR                         | 2313.0307 | IPI00227857 | IPI00227857 | yes | yes | 3     | 0.0006659  | 119.08 |
| FAVESIVPSSISIMHSPDAQN(de)MSEVSISPMEISTFR        | 4019.9319 | IPI00114044 | IPI00114044 | yes | yes | 3,4   | 6.1784E-10 | 87.772 |

|                                                |           |             |             |     |     |       |   |             |        |
|------------------------------------------------|-----------|-------------|-------------|-----|-----|-------|---|-------------|--------|
| FAQPQWHIIHINGTFSN(de)ETEPDTEPCVDGWVYDR         | 4057.833  | IPI0022634€ | IPI0022634€ | yes | no  |       | 4 | 0.0006869   | 63.427 |
| FAQPQWHIIHIN(de)GTFSNETEPDTEPCVDGWVYDR         | 4057.833  | IPI0022634€ | IPI0022634€ | yes | no  |       | 4 | 0.0006869   | 63.427 |
| FANEYPN(de)ITR                                 | 1223.5935 | IPI0013057€ | IPI0013057€ | yes | yes |       | 2 | 0.0078763   | 125.97 |
| FAIKNEDSN(de)FTIINHNDNTANITVK                  | 2832.4042 | IPI0013818€ | IPI0013818€ | yes | yes |       | 3 | 2.0356E-07  | 161.47 |
| FAIIKDYR(de)PSAGNNSIYQDVTVFK                   | 2745.4126 | IPI0032246€ | IPI0032246€ | yes | no  |       | 3 | 8.6341E-06  | 126.25 |
| FAEIN(de)GSAICSYNIKPSEYTITSK                   | 2692.3054 | IPI00421237 | IPI00421237 | yes | no  |       | 3 | 0.0001175   | 111.4  |
| F(de)IFKNQTIHVIYGPR                            | 2074.1364 | IPI0012297€ | IPI0012297€ | yes | no  | 2,3,4 |   | 4.2134E-27  | 218.43 |
| F(de)APPQPAEPWSFVKNTTSYPPMCSQDAVGGQVISEIFTNR   | 4453.1147 | IPI0038728€ | IPI0038728€ | yes | yes |       | 4 | 5.7495E-05  | 65.375 |
| EYHTIDDHCVYN(de)STHIGIQR                       | 2457.1132 | IPI0012785€ | IPI0012785€ | yes | yes |       | 3 | 3.1594E-19  | 203.99 |
| EYEGAVYPDND(de)TTDFQR                          | 1903.8224 | IPI00605187 | IPI00605187 | yes | no  |       | 2 | 3.823E-05   | 170.78 |
| EWN(de)GTYHCIFR                                | 1481.651  | IPI00876541 | IPI00876541 | yes | no  |       | 2 | 1.6318E-11  | 186.87 |
| EWIPIN(de)HSVNSVVVR                            | 1747.937  | IPI0022475€ | IPI0022475€ | yes | yes |       | 2 | 6.9702E-06  | 160.18 |
| EVTVIGVATAPTQVISNGIPVSN(de)FTYSPDNK            | 3217.6507 | IPI0011196€ | IPI0011196€ | yes | yes |       | 3 | 0.0001271   | 76.439 |
| EVNSQIDNNGCSTQEVN(de)ITEIQSK                   | 2706.2403 | IPI0012322€ | IPI0012322€ | yes | yes | 2,3   |   | 2.8379E-15€ | 299.51 |
| EVNSKIDNNGCSTQEVN(de)ITEIQSK                   | 2706.2767 | IPI0027126€ | IPI0027126€ | yes | yes |       | 3 | 1.9456E-06  | 115.39 |
| EVN(de)KTCEAIFK                                | 1450.749  | IPI0011511€ | IPI0011511€ | yes | yes |       | 2 | 9.333E-09   | 176.18 |
| EVN(de)ITVIDRK                                 | 1185.6717 | IPI0011138€ | IPI0011138€ | yes | no  |       | 2 | 0.018238    | 120.06 |
| EVHFFVNA(de)SDVDSVK                            | 1691.8155 | IPI0031004€ | IPI0031004€ | yes | yes |       | 2 | 0.0047681   | 109.07 |
| ETYIETN(de)YTIK                                | 1373.6715 | IPI0012015€ | IPI0012015€ | yes | yes |       | 2 | 0.0057433   | 113.22 |
| ETIVTIFDN(de)R                                 | 1206.6245 | IPI0012723€ | IPI0012723€ | yes | no  |       | 2 | 0.0018436   | 152.07 |
| ETIKNQTFGGAETVPQEATATFN(de)STAIKK              | 3081.5619 | IPI00117424 | IPI00117424 | yes | no  |       | 3 | 0.0010451   | 75.868 |
| ETIKN(de)QTFGGAETVPQEATATFNSTAIKK              | 3081.5619 | IPI00117424 | IPI00117424 | yes | no  |       | 3 | 0.0010451   | 75.868 |
| ETAEYAAAN(de)ITQAVFDYFEDYFAMEYAIPIK            | 3409.5377 | IPI0013458€ | IPI0013458€ | yes | no  |       | 3 | 0.02616     | 51.119 |
| ESSEHPWK(de)WTDNTEYNNTIPIRGEER                 | 3187.4595 | IPI0027643€ | IPI0027643€ | yes | yes |       | 3 | 0.0003342   | 108.13 |
| ESQTIGDQCVYNSTHIGFQREN(de)GTFSK                | 3102.4101 | IPI0011813€ | IPI0011813€ | yes | yes |       | 3 | 0.0003818   | 85.224 |
| ESQTIGDQCVYN(de)STHIGFQRENGTFSK                | 3102.4101 | IPI0011813€ | IPI0011813€ | yes | yes |       | 3 | 0.0003818   | 85.224 |
| ESQTIGDQCVYN(de)STHIGFQR                       | 2339.0601 | IPI0011813€ | IPI0011813€ | yes | yes | 2,3   |   | 1.3004E-37  | 228.08 |
| ESQIN(de)ITVMAKPTNWIEGTR                       | 2287.1631 | IPI0031140€ | IPI0031140€ | yes | yes | 2,3   |   | 0.0003424   | 137.69 |
| ESNPITAQQT(de)KIDAPTNIQFVNETDR                 | 3030.4894 | IPI0011353€ | IPI0011353€ | yes | no  |       | 3 | 6.4216E-10  | 139.04 |
| ESIIPVTIQCND(de)ITSSSHTIMYSYWTR                | 3086.4841 | IPI00757771 | IPI00757771 | yes | no  |       | 3 | 0.0048604   | 69.398 |
| ESGIQN(de)VSTCR                                | 1249.5721 | IPI01008227 | IPI01008227 | yes | no  |       | 2 | 2.5519E-05  | 167.18 |
| ESGIN(de)MTIPEENQPVVFNHIYNIK                   | 2785.3745 | IPI0040393€ | IPI0040393€ | yes | no  |       | 3 | 1.9239E-06  | 130.01 |
| ERVEN(de)TSQPGEMQVTIQNIMPATVYIFK               | 3222.6053 | IPI0012915€ | IPI0012915€ | yes | no  |       | 3 | 1.4411E-11  | 141.36 |
| ERTEVIIQGTVSPN(de)ASAPDAVWEDYEFK               | 3150.5146 | IPI00405437 | IPI00405437 | yes | no  |       | 3 | 0.0004897   | 77.641 |
| ERSWSTVGN(de)CTAAIR                            | 1706.8159 | IPI00128484 | IPI00128484 | yes | yes |       | 2 | 0.0073876   | 110.55 |
| ERKP(de)JNNISDTVK                              | 1399.7419 | IPI0010884€ | IPI0010884€ | yes | yes |       | 2 | 9.8348E-06  | 172.13 |
| EREDVQAIN(de)ISVPYGPPIEDFQR                    | 2671.3242 | IPI01023131 | IPI01023131 | yes | no  |       | 3 | 6.6238E-06  | 130.49 |
| EQYIHEN(de)YSR                                 | 1337.6    | IPI0012740€ | IPI0012740€ | yes | no  |       | 2 | 0.012354    | 112.83 |
| EQSFQGSN(de)MTIFYR                             | 1706.7723 | IPI00453571 | IPI00453571 | yes | no  |       | 2 | 0.010931    | 99.927 |
| EQNYTCHVYHEGL(de)PEPITIR                       | 2455.159  | IPI01026927 | IPI01026927 | yes | no  | 2,3   |   | 5.4305E-05  | 171.04 |
| EQIN(de)ISIDHR                                 | 1223.6258 | IPI00127407 | IPI00127407 | yes | no  |       | 2 | 0.01621     | 108.7  |
| EQGPSIVTPPKDIWN(de)VTGAK                       | 2136.1215 | IPI0092982€ | IPI0092982€ | yes | yes |       | 2 | 0.0056374   | 97.384 |
| EQESMMN(de)ITIHIVK                             | 1671.8324 | IPI0099093€ | IPI0099093€ | yes | no  |       | 2 | 0.0009212   | 119.88 |
| ENYAEIIDDGFIKN(de)ITAQICIDKK                   | 2810.416  | IPI0033988€ | IPI0033988€ | yes | no  |       | 3 | 5.3177E-51  | 235.24 |
| ENS(de)SYQVINWR                                | 1394.6579 | IPI0015331€ | IPI0015331€ | yes | yes |       | 2 | 4.1334E-17  | 197.07 |
| ENPGHIYNKN(de)ISQK                             | 1640.8271 | IPI0012217€ | IPI0012217€ | yes | no  |       | 2 | 3.1278E-06  | 164.88 |
| ENIIDISNAN(de)R                                | 1257.6313 | IPI0094471€ | IPI0094471€ | no  | no  |       | 2 | 1.4333E-11  | 191.29 |
| ENIFGIQGAGGFQDREEEYAEPGVTEAEPVATEDAN(de)STDSII | 4945.269  | IPI00378224 | IPI00378224 | yes | yes | 4,5   |   | 1.6143E-09  | 70.835 |
| ENGTFSKYEGGVETFAHIIIVIR(de)K                   | 2594.3493 | IPI0011813€ | IPI0011813€ | yes | yes |       | 3 | 3.5278E-05  | 148.06 |
| EN(de)NSPAIHIGTISATDSDSGNAHITYSIR              | 3127.4806 | IPI00469537 | IPI00469537 | yes | yes |       | 3 | 1.3185E-06  | 89.297 |
| EN(de)ISDPTSPIR                                | 1227.6095 | IPI0013692€ | IPI0013692€ | yes | no  |       | 2 | 0.0016547   | 140.14 |
| EN(de)GTFSKYEGGVETFAHIIIVIR                    | 2466.2543 | IPI0011813€ | IPI0011813€ | yes | yes | 3,4   |   | 1.0924E-96  | 265.37 |
| EN(de)GTDVQEEEESPAEGSK                         | 2004.8396 | IPI0012334€ | IPI0012334€ | yes | yes |       | 2 | 0.0017472   | 104.84 |
| EMN(de)CSETISQIQK                              | 1566.7018 | IPI00459134 | IPI00459134 | yes | no  |       | 2 | 4.3624E-18  | 196.5  |
| EMGNTVMDIIRN(de)YTANATSSREEAWDYVQAQVK          | 3789.7727 | IPI0010809€ | IPI0010809€ | yes | no  |       | 4 | 0.045213    | 43.206 |
| EMGNTVMDIIRN(de)YTANATSSR                      | 2343.0947 | IPI0010809€ | IPI0010809€ | yes | no  |       | 3 | 0.030656    | 66.777 |
| EMGNT(de)VMDIIRNYTANATSSREEAWDYVQAQVK          | 3789.7727 | IPI0010809€ | IPI0010809€ | yes | no  |       | 4 | 0.045213    | 43.206 |
| EMGNT(de)VMDIIRNYTANATSSR                      | 2343.0947 | IPI0010809€ | IPI0010809€ | yes | no  |       | 3 | 0.030656    | 66.777 |
| EKVEN(de)GSETGPIPEIQPIIEGEVK                   | 2688.3858 | IPI0013601€ | IPI0013601€ | yes | yes | 2,3   |   | 2.3648E-09  | 170.11 |
| EKSCVAITDAFPQN(de)MSR                          | 1952.9084 | IPI0040574€ | IPI0040574€ | yes | no  |       | 2 | 0.0096227   | 104.88 |
| EKEDRPFHQAVVN(de)DTQAFWHNK                     | 2695.2891 | IPI00406901 | IPI00406901 | yes | no  |       | 3 | 0.0001497   | 155.94 |
| EKDVIWFRPTIINDTGN(de)YTTCMIR                   | 2841.3942 | IPI0092988€ | IPI0092988€ | yes | no  |       | 3 | 4.2127E-06  | 143.57 |
| EKDVIWFRPTIIN(de)DTGNYTCMIR                    | 2841.3942 | IPI0092988€ | IPI0092988€ | yes | no  |       | 3 | 4.2127E-06  | 143.57 |
| EIYESIWQN(de)FTDSK                             | 1758.8101 | IPI0027269€ | IPI0027269€ | yes | yes |       | 2 | 0.031467    | 82.102 |
| EITGIRN(de)ISSQEGSTDVVAR                       | 2131.0869 | IPI0067739€ | IPI0067739€ | yes | no  | 2,3   |   | 2.2634E-08  | 190.46 |
| EITD(de)TGKNAVNTYKKNEDDCVVR                    | 2700.2119 | IPI00266264 | IPI00266264 | yes | yes |       | 3 | 0.030659    | 75.215 |
| EIKGDGPFTVFPVPHADI(de)ISNMSQDEIAR              | 3085.5179 | IPI0098726€ | IPI0098726€ | yes | no  |       | 3 | 4.0281E-11  | 138.96 |
| EIIYSN(de)GSIIQMITMK                           | 1987.0159 | IPI0010853€ | IPI0010853€ | no  | no  | 2,3   |   | 1.1584E-11€ | 278.27 |
| EIIVHPN(de)YTR                                 | 1240.6564 | IPI0011375€ | IPI0011375€ | yes | yes |       | 2 | 1.168E-06   | 182.28 |
| EIIVDEIISN(de)SSTIASYK                         | 1981.0256 | IPI00173181 | IPI00173181 | yes | no  |       | 2 | 0.0001434   | 151.95 |
| EIISN(de)ASDAIDKIR                             | 1543.8206 | IPI0012952€ | IPI0012952€ | no  | no  |       | 2 | 4.8292E-79  | 263.56 |
| EIHIIQEQN(de)VSNVDFIDKEEFFIGSK                 | 2986.4825 | IPI00605187 | IPI00605187 | yes | no  |       | 3 | 2.0308E-68  | 247.64 |
| EIGAIYN(de)CSNIAQDIEK                          | 2050.0041 | IPI0022141€ | IPI0022141€ | yes | no  |       | 2 | 1.2735E-13€ | 284.57 |
| EIEYYVQGSFANAMYND(de)ACR                       | 2284.9881 | IPI0013260€ | IPI0013260€ | yes | yes |       | 2 | 0.0005134   | 136.66 |
| EHSIFIDIHPVTGIPMN(de)CSVK                      | 2393.1872 | IPI01008227 | IPI01008227 | yes | no  | 2,3   |   | 2.3912E-08  | 183.74 |
| EGTYSIPTSN(de)FTVPDIEIPSWISTGNYR               | 3143.5088 | IPI0011909€ | IPI0011909€ | yes | yes |       | 2 | 4.1285E-07  | 92.463 |
| EGSRTDDEVVQREEEAIQIDGIN(de)ASQIR               | 3156.5283 | IPI0012952€ | IPI0012952€ | yes | yes | 3,4   |   | 1.603E-18   | 194.75 |
| EGPRNISTCFSSGDIF(de)AAHNISER                   | 2664.2351 | IPI0012342€ | IPI0012342€ | yes | no  |       | 3 | 1.924E-80   | 260.06 |
| EGN(de)CSAQSGIAWQDCDFKDAEEAATGECTATVGK         | 3662.5196 | IPI0011495€ | IPI0011495€ | yes | no  |       | 3 | 3.9937E-20  | 137.42 |
| EGN(de)CSAQSGIAWQDCDFK                         | 2071.8364 | IPI0011495€ | IPI0011495€ | yes | no  |       | 2 | 3.6707E-85  | 195.96 |
| EGKFDEVYDAIAGHPN(de)ITVYK                      | 2436.1961 | IPI0011116€ | IPI0011116€ | yes | no  |       | 3 | 1.0456E-06  | 142.58 |
| EFVENSECIQCHPECIPQAMN(de)ITCTGR                | 3279.3876 | IPI0012119€ | IPI0012119€ | yes | no  | 3,4   |   | 2.4191E-09  | 129.2  |
| EFQHN(de)STMYK                                 | 1446.6238 | IPI0078844€ | IPI0078844€ | yes | no  |       | 2 | 0.0032921   | 131.82 |
| EFEQIQVFMSSVIDMFPIGPN(de)K                     | 2555.244  | IPI0099093€ | IPI0099093€ | yes | yes |       | 3 | 0.013966    | 64.2   |
| EEQFN(de)STFR                                  | 1156.5149 | IPI0047524€ | IPI0047524€ | yes | no  |       | 2 | 0.0078667   | 137.95 |
| EEN(de)ATIATYPEFGVIDIK                         | 2008.9993 | IPI00124221 | IPI00124221 | yes | no  |       | 2 | 3.4345E-19  | 206.62 |

|                                           |           |             |             |     |     |       |   |             |        |
|-------------------------------------------|-----------|-------------|-------------|-----|-----|-------|---|-------------|--------|
| EEIGTYPPYPTGEPVFGGIPQN(de)ASIVTHIAHTFQDIK | 4190.0637 | IPI00453571 | IPI00453571 | yes | no  |       | 4 | 0.017711    | 41.935 |
| EEEAIQIDGIN(de)ASQIR                      | 1784.8905 | IPI0012952E | IPI0012952E | yes | yes |       | 2 | 3.5017E-13  | 197.75 |
| EDTVTITCEGTHNPGN(de)SSTQWFHNGR            | 2944.2794 | IPI0012948E | IPI0012948E | yes | no  |       | 3 | 7.3394E-10  | 139.11 |
| EDSSRAVN(de)VSAIPANIQK                    | 1897.9858 | IPI0035430C | IPI0035430C | yes | no  |       | 2 | 0.0050296   | 98.508 |
| EDSCQINY(de)SEGPCIGMQR                    | 2271.9195 | IPI0012735Z | IPI0012735Z | yes | yes |       | 2 | 2.8743E-77  | 254.82 |
| EDRPFHQAVVNDT(de)QAFWHNK                  | 2438.1516 | IPI0040690I | IPI0040690I | yes | no  |       | 3 | 1.1889E-12  | 197.14 |
| EDIIA(de)IRQNFSNITVSTEDQVK                | 2519.2867 | IPI00129677 | IPI00129677 | yes | no  | 2,3   |   | 9.8409E-06  | 172    |
| ED(de)IIAIRQNFSNITVSTEDQVK                | 2519.2867 | IPI00129677 | IPI00129677 | yes | no  | 2,3   |   | 9.8409E-06  | 172    |
| ECIGN(de)CSEPDDPTK                        | 1620.6396 | IPI0012835E | IPI0012835E | yes | no  |       | 2 | 3.4599E-07  | 171.81 |
| ECHTIQN(de)YTIWR                          | 1619.7515 | IPI0012522C | IPI0012522C | yes | no  | 2,3   |   | 7.7825E-67  | 251.24 |
| EAYKN(de)ISIIYSQMOK                       | 1814.9237 | IPI0022170E | IPI0022170E | yes | no  | 2,3   |   | 3.8266E-10  | 188.59 |
| EATIVGEN(de)ETYPR                         | 1477.7049 | IPI0013114Z | IPI0013114Z | yes | no  |       | 2 | 0.009308    | 100.22 |
| EASNHSSGAGIVQIN(de)KSNDKETVVGR            | 2696.3478 | IPI00108844 | IPI00108844 | yes | no  |       | 3 | 0.0055786   | 75.868 |
| EASNHSSGAGIVQIN(de)K                      | 1610.8012 | IPI00108844 | IPI00108844 | yes | no  | 2,3   |   | 8.1987E-38  | 231.71 |
| EASN(de)HSSGAGIVQINKSNDKETVVGR            | 2696.3478 | IPI00108844 | IPI00108844 | yes | no  |       | 3 | 0.0055786   | 75.868 |
| EASN(de)HSSGAGIVQINK                      | 1610.8012 | IPI00108844 | IPI00108844 | yes | no  | 2,3   |   | 8.1987E-38  | 231.71 |
| EASHYSIHDIVISYN(de)TSDSTVFPGAVAK          | 3007.4563 | IPI00222967 | IPI00222967 | yes | no  | 2,3,4 |   | 3.5426E-20  | 202.73 |
| EARPITPAAIN(de)GSIQR                      | 1692.9271 | IPI0051543Z | IPI0051543Z | yes | no  |       | 2 | 0.0085052   | 107.69 |
| EAQYN(de)STFR                             | 1114.5043 | IPI0080798Z | IPI0080798Z | yes | no  |       | 2 | 0.0056377   | 145.25 |
| EAN(de)ITEDQIIFFPK                        | 1663.8457 | IPI0012212Z | IPI0012212Z | yes | no  |       | 3 | 0.0033294   | 113.99 |
| EAFN(de)ETNQAIQTISR                       | 1720.838  | IPI00112614 | IPI00112614 | yes | yes |       | 2 | 5.1753E-15E | 295.37 |
| EAFIPQGGSVQVN(de)CSSSCK                   | 2053.9197 | IPI0012297Z | IPI0012297Z | yes | no  |       | 2 | 0.0005899   | 131.98 |
| EACIQHYVYN(de)ASYIVWK                     | 2143.0197 | IPI0012015E | IPI0012015E | yes | yes |       | 2 | 0.0002066   | 146.3  |
| E(de)SVYRNYISIFIADINQER                   | 2216.0862 | IPI0033131E | IPI0033131E | yes | no  |       | 3 | 0.0008323   | 162.81 |
| DYYPIN(de)ESIASIPR                        | 1749.8938 | IPI00121627 | IPI00121627 | yes | yes | 2,3   |   | 9.2645E-07  | 167.98 |
| DYYIN(de)KTENEK                           | 1415.6569 | IPI0039684C | IPI0039684C | yes | no  |       | 2 | 4.2313E-17  | 199.82 |
| DYRPSAGN(de)NSIQDQTVVFK                   | 2173.044  | IPI0032246Z | IPI0032246Z | yes | no  | 2,3   |   | 3.3336E-05  | 179.1  |
| DYCMYNNN(de)WTR                           | 1698.6555 | IPI0012177E | IPI0012177E | yes | yes |       | 2 | 2.8152E-09  | 179.93 |
| DWIWNQMHIIDEKN(de)ESIPHYVGK               | 2867.3337 | IPI0013818C | IPI0013818C | yes | yes |       | 3 | 0.0056894   | 86.727 |
| DWCN(de)WTIISR                            | 1349.6187 | IPI0012493Z | IPI0012493Z | yes | no  |       | 2 | 1.2226E-09  | 189.13 |
| DVIWFRPTIINDTGNYT(de)CMIR                 | 2584.2566 | IPI0092988E | IPI0092988E | yes | no  |       | 3 | 0.0002221   | 156.13 |
| DVGSSTTN(de)NSQACAQFIEQYFHNSDITEFMR       | 3566.5467 | IPI0013066I | IPI0013066I | yes | yes | 3,4   |   | 1.6623E-15  | 164.31 |
| DVFIP(de)KPSWGNHTPIFR                     | 2010.0476 | IPI0011731Z | IPI0011731Z | yes | yes | 2,3   |   | 0.0092565   | 130.21 |
| DTYVN(de)ASQSIYGSSPR                      | 1743.8064 | IPI00122977 | IPI00122977 | yes | no  |       | 2 | 1.1346E-17E | 306.53 |
| DTVQHWN(de)WTSDIPIQCATHSVSIR              | 2850.3508 | IPI0011929E | IPI0011929E | yes | no  |       | 3 | 2.0563E-05  | 113.73 |
| DTTGSHTFQGMFGCEITNN(de)R                  | 2271.9637 | IPI00137987 | IPI00137987 | yes | yes |       | 3 | 0.000392    | 118.48 |
| DTISIN(de)ATNIK                           | 1188.635  | IPI0012119C | IPI0012119C | yes | no  |       | 2 | 7.127E-34   | 221.55 |
| DTEENIHVIN(de)QTISEVIFPMDIK               | 2684.3367 | IPI0035646Z | IPI0035646Z | yes | no  |       | 3 | 0.028418    | 63.69  |
| DTCAQECSHFNI(de)TKVESR                    | 2180.9579 | IPI00132474 | IPI00132474 | yes | no  |       | 3 | 0.0023707   | 130.4  |
| DTCAQECSHFNI(de)TK                        | 1709.7138 | IPI00132474 | IPI00132474 | yes | no  |       | 2 | 2.6329E-39  | 232.17 |
| DTAVEGEEIEVN(de)CTAMASKPATTIR             | 2692.2684 | IPI0085672Z | IPI0085672Z | yes | no  |       | 3 | 0.0006886   | 95.624 |
| DSYDPGN(de)ITWYRNGK                       | 1784.8118 | IPI0012137E | IPI0012137E | yes | no  |       | 2 | 7.1503E-11  | 192.39 |
| DSYDPGN(de)ITWYR                          | 1485.6525 | IPI0012137E | IPI0012137E | yes | no  |       | 2 | 0.0060213   | 107.17 |
| DSKIN(de)NTNVR                            | 1159.5945 | IPI0038080I | IPI0038080I | yes | no  |       | 2 | 0.021667    | 113.69 |
| DSGIWINGFDYTGMSHVTPHIPEIN(de)DTIR         | 3284.5561 | IPI0040722Z | IPI0040722Z | yes | yes |       | 3 | 1.1449E-14  | 144.56 |
| DQQAEEANKN(de)ASIIK                       | 1712.9057 | IPI01016174 | IPI01016174 | yes | no  |       | 3 | 0.026137    | 83.499 |
| DQGNV(de)TDMASMK                          | 1295.5486 | IPI0047108I | IPI0047108I | yes | yes |       | 2 | 1.6243E-81  | 257.76 |
| DQDCDKF(de)NQCCTEFKECHTIQNYTIWR           | 3753.5705 | IPI0012522C | IPI0012522C | yes | no  |       | 4 | 3.3565E-05  | 82.302 |
| DQCIVDDITYNVN(de)DTFHKR                   | 2352.0805 | IPI0011353E | IPI0011353E | yes | no  | 2,3   |   | 7.5559E-09  | 192.6  |
| DQCIVDDITYNVN(de)DTFHK                    | 2195.9793 | IPI0011353E | IPI0011353E | yes | no  | 2,3   |   | 4.3996E-94  | 269.59 |
| DNVN(de)CSGVYEHEPIEIGK                    | 2058.9317 | IPI00947577 | IPI00947577 | yes | yes |       | 2 | 2.3018E-05  | 176.28 |
| DNSCVDPPHVPN(de)ATIVTR                    | 1990.9531 | IPI0013001C | IPI0013001C | yes | no  | 2,3   |   | 4.6604E-77  | 256.67 |
| DNATDS(de)VPIR                            | 1086.5306 | IPI0011906Z | IPI0011906Z | yes | yes |       | 2 | 6.5544E-07  | 157.68 |
| DN(de)YSVIIQENKPVGFSVIK                   | 2149.1419 | IPI00623114 | IPI00623114 | yes | no  |       | 2 | 0.021004    | 85.362 |
| DN(de)TTCYEFKK                            | 1304.5707 | IPI0011906Z | IPI0011906Z | yes | yes |       | 2 | 0.0029896   | 155    |
| DN(de)SSGTFIVIR                           | 1320.7038 | IPI0011996I | IPI0011996I | yes | no  |       | 2 | 0.0019282   | 126.83 |
| DN(de)SCVDPPHVPNATIVTR                    | 1990.9531 | IPI0013001C | IPI0013001C | yes | no  | 2,3   |   | 4.6604E-77  | 256.67 |
| DN(de)HTSCAECIK                           | 1333.5391 | IPI0032060E | IPI0032060E | yes | no  |       | 2 | 0.0009939   | 150.46 |
| DN(de)DSIITRK                             | 1060.5513 | IPI0013116E | IPI0013116E | yes | yes |       | 2 | 0.029389    | 145.25 |
| DN(de)DSIITR                              | 932.45632 | IPI0013116E | IPI0013116E | yes | yes |       | 2 | 0.044658    | 91.658 |
| DN(de)ATQEEIIHYIEK                        | 1701.821  | IPI0032119C | IPI0032119C | yes | no  | 2,3   |   | 4.5808E-07  | 171.26 |
| DMSDGFISN(de)ITIQR                        | 1595.7614 | IPI0027238I | IPI0027238I | yes | no  |       | 2 | 3.1742E-11E | 283.82 |
| DKVTFIN(de)TTR                            | 1193.6404 | IPI00120674 | IPI00120674 | yes | no  |       | 2 | 0.0098327   | 131.43 |
| DKNGTAEPPIN(de)ASAGDQEEK                  | 2226.0513 | IPI0012334Z | IPI0012334Z | yes | yes | 2,3   |   | 1.1583E-78  | 263.55 |
| DKN(de)GTRAEPINASAGDQEEK                  | 2226.0513 | IPI0012334Z | IPI0012334Z | yes | yes | 2,3   |   | 1.1583E-78  | 263.55 |
| DKISPIHIA(de)INFSIDPK                     | 1907.0516 | IPI0011597E | IPI0011597E | yes | yes | 2,3   |   | 5.3451E-05  | 172.82 |
| DIWN(de)VTGAK                             | 1002.5134 | IPI00652107 | IPI00652107 | no  | no  | 1,2   |   | 0.035656    | 113.62 |
| DIWN(de)VTGAK                             | 1002.5134 | IPI00652107 | IPI00652107 | no  | no  | 1,2   |   | 0.035656    | 113.62 |
| DIVV(de)EIYSQWMKNPNNTIHPNIR               | 2894.4497 | IPI0031950E | IPI0031950E | yes | no  |       | 3 | 0.0007815   | 102.98 |
| DIVQNVFMSN(de)MSMDIQSHPSSCP               | 2751.2125 | IPI0012119C | IPI0012119C | yes | no  |       | 3 | 3.6769E-05  | 110.75 |
| DIVGN(de)ITEIESEDIQIEAIIMR                | 2500.2731 | IPI0012239E | IPI0012239E | yes | no  |       | 3 | 2.03E-29    | 219.87 |
| DITNIIN(de)NTFIR                          | 1432.7674 | IPI0065003E | IPI0065003E | yes | no  |       | 2 | 3.9383E-19  | 198.74 |
| DISVFAPN(de)MTEIHKDVTQYR                  | 2339.1831 | IPI0085510Z | IPI0085510Z | yes | no  |       | 3 | 0.020153    | 83.418 |
| DISGN(de)ETHFTGSEVGFIPISCR                | 2550.2173 | IPI0012365Z | IPI0012365Z | yes | no  |       | 3 | 7.6848E-10  | 190.67 |
| DIRPN(de)HTIYINMNDKIK                     | 2198.1266 | IPI0013257E | IPI0013257E | yes | no  |       | 3 | 0.018418    | 76.82  |
| DIQDIHKDTEN(de)R                          | 1482.7063 | IPI00129304 | IPI00129304 | yes | yes |       | 2 | 0.0019377   | 149.69 |
| DINSQIEIQNVN(de)DTHITIIIGIKPDTTYDIK       | 3511.8046 | IPI00110264 | IPI00110264 | yes | yes |       | 3 | 4.8492E-15  | 168.25 |
| DINSQIEIQN(de)VTNDTHITIIIGIKPDTTYDIK      | 3511.8046 | IPI00110264 | IPI00110264 | yes | yes |       | 3 | 4.8492E-15  | 168.25 |
| DIN(de)HTAQGIIEK                          | 1337.6939 | IPI0012095Z | IPI0012095Z | yes | no  |       | 2 | 0.0020489   | 141.37 |
| DIIHSTGHN(de)ISR                          | 1461.7688 | IPI00223987 | IPI00223987 | yes | yes |       | 2 | 1.0968E-18  | 201.48 |
| DIHVVFHFGQTIIDN(de)R                      | 1899.9704 | IPI0040660Z | IPI0040660Z | yes | yes |       | 2 | 0.0038919   | 110.22 |
| DIGTASHN(de)FSGAIPR                       | 1541.7587 | IPI0022982C | IPI0022982C | yes | yes |       | 2 | 1.2151E-05  | 157.38 |
| DIGPAIAN(de)SSHDVK                        | 1422.7103 | IPI0010881I | IPI0010881I | yes | yes |       | 2 | 3.9849E-21  | 205.3  |
| DIFTNQSDFADTTKDTPIITIVH(de)K              | 2820.4182 | IPI0011610E | IPI0011610E | yes | yes |       | 3 | 2.3453E-09  | 166.27 |
| DIEHHITNVNVSFYDDIVN(de)GTVIK              | 2741.3661 | IPI0046760C | IPI0046760C | yes | yes |       | 3 | 4.0427E-30  | 220.63 |
| DIEHHITNVN(de)VSFYDDIVNGTVIK              | 2741.3661 | IPI0046760C | IPI0046760C | yes | yes |       | 3 | 4.0427E-30  | 220.63 |



|                                           |           |             |             |     |     |       |   |             |        |
|-------------------------------------------|-----------|-------------|-------------|-----|-----|-------|---|-------------|--------|
| DIDTDFTSN(de)ASQPETK                      | 1767.7799 | IPI00130573 | IPI00130573 | yes | yes |       | 2 | 7.9916E-09  | 188.44 |
| DIAVGDDYTN(de)R                           | 1237.5575 | IPI00468674 | IPI00468674 | yes | no  |       | 2 | 0.0056909   | 113.61 |
| DHVNVSMEIATDFPFN(de)TTEWEGYIPK            | 3039.396  | IPI00136942 | IPI00136942 | yes | yes |       | 3 | 3.9459E-11  | 183.07 |
| DHVN(de)VSMIEATDFPFNTTEWEGYIPK            | 3039.396  | IPI00136942 | IPI00136942 | yes | yes |       | 3 | 3.9459E-11  | 183.07 |
| DHIIN(de)KTHSICPR                         | 1589.8096 | IPI00118994 | IPI00118994 | yes | yes |       | 2 | 0.0022794   | 144.27 |
| DHGDIAFVDVFN(de)DSSFQIVKNPR               | 2569.2561 | IPI00117914 | IPI00117914 | yes | yes |       | 3 | 5.9361E-112 | 228.39 |
| DGTSQPAICPQN(de)VTMNMEGIK                 | 2290.0392 | IPI00320204 | IPI00320204 | yes | yes |       | 2 | 7.2736E-30  | 223.54 |
| DGTDDPSYNGAIIVSGNEKN(de)HSFSFACNTK        | 3244.4367 | IPI00170145 | IPI00170145 | yes | no  |       | 3 | 2.1316E-06  | 107.17 |
| DGSQDFNE(de)TWENYEK                       | 1860.7439 | IPI00128206 | IPI00128206 | yes | yes |       | 2 | 1.2866E-08  | 182.57 |
| DGSDSAAMVYN(de)SSQEWGIR                   | 2071.8905 | IPI00119522 | IPI00119522 | yes | yes |       | 2 | 1.0186E-204 | 315.94 |
| DGIAIN(de)ITIR                            | 1084.6241 | IPI00119065 | IPI00119065 | yes | yes |       | 2 | 0.0037173   | 136.48 |
| DGHFKEDPYWENMIN(de)HSVHR                  | 2510.1186 | IPI00410796 | IPI00410796 | yes | yes |       | 3 | 0.0002025   | 140.22 |
| DGAFHHIHSTPFGN(de)YSFISVDATQRPQPK         | 3182.5322 | IPI00226714 | IPI00226714 | yes | no  |       | 3 | 8.0232E-09  | 133.41 |
| DFIN(de)YTIEER                            | 1298.6143 | IPI00134191 | IPI00134191 | yes | no  |       | 2 | 0.0018552   | 152.7  |
| DEIGN(de)VSTSHIIIDDSVEMEIRPR              | 2837.4229 | IPI00309035 | IPI00309035 | yes | yes |       | 3 | 0.0024912   | 79.467 |
| DDYRPTWTIN(de)QTEPVAGNYYPVNT              | 2969.3944 | IPI00381303 | IPI00381303 | yes | yes | 3,4   |   | 5.7996E-55  | 240.44 |
| DDIHPTIPAGQYFIN(de)ITYNYPVHSFDGR          | 3249.552  | IPI00387318 | IPI00387318 | yes | no  | 3,4   |   | 1.1557E-11  | 175.42 |
| DCVSCQN(de)VSR                            | 1223.5023 | IPI0012119C | IPI0012119C | yes | no  |       | 2 | 6.8408E-06  | 177.44 |
| DCDFIEDGEERN(de)CTGK                      | 1943.7626 | IPI0012728C | IPI0012728C | yes | yes |       | 2 | 4.9776E-28  | 222.45 |
| DAMVGN(de)YTCEVTEISR                      | 1843.808  | IPI0012483C | IPI0012483C | yes | no  |       | 2 | 5.5194E-49  | 239.55 |
| DAHFN(de)STITEFGETINNFVER                 | 2440.1295 | IPI00346062 | IPI00346062 | yes | yes |       | 3 | 0.0070384   | 83.723 |
| DAGN(de)YTVIITNPISMEK                     | 1864.9241 | IPI00124326 | IPI00124326 | yes | no  |       | 2 | 0.0019444   | 134.93 |
| DAAQCSGGSVAHIAEIGIPTN(de)JTHIIIFR         | 3060.5815 | IPI00331407 | IPI00331407 | yes | no  |       | 3 | 1.1527E-12  | 146.75 |
| CVYEAICSN(de)VTSECPPPVITR                 | 2451.1233 | IPI00405742 | IPI00405742 | yes | no  |       | 3 | 1.5613E-09  | 193.19 |
| CVVHYEN(de)STVPEKK                        | 1688.8192 | IPI00409148 | IPI00409148 | yes | yes | 2,3,4 |   | 7.3812E-08  | 181.71 |
| CVVHYEN(de)STVPEK                         | 1560.7242 | IPI00409148 | IPI00409148 | yes | yes |       | 2 | 0.0023324   | 119.88 |
| CVAN(de)YTGNGR                            | 1110.4876 | IPI00111793 | IPI00111793 | yes | yes |       | 2 | 0.0044883   | 134.57 |
| CTPPPYVENAVMISEN(de)R                     | 1975.9132 | IPI00138061 | IPI00138061 | yes | no  |       | 2 | 4.1806E-05  | 155.1  |
| CTAQVCAGYCSNN(de)STCTVNQGNQPQCR           | 3134.2481 | IPI00119063 | IPI00119063 | yes | yes |       | 3 | 0.0011242   | 73.11  |
| CTAQVCAGYCSN(de)NSTCTVNQGNQPQCR           | 3134.2481 | IPI00119063 | IPI00119063 | yes | yes |       | 3 | 0.0011242   | 73.11  |
| CSIIHSN(de)ISVK                           | 1256.6547 | IPI00133222 | IPI00133222 | yes | no  |       | 2 | 7.1499E-12  | 190.53 |
| CQSPYQMN(de)GSDTVTCVNSR                   | 2202.9092 | IPI0013001C | IPI0013001C | yes | no  | 2,3   |   | 3.2954E-05  | 142.94 |
| CQAYKN(de)NSESFIHIYMYEVAR                 | 2622.1995 | IPI00130654 | IPI00130654 | yes | no  |       | 3 | 8.4578E-05  | 135.18 |
| CQAIDFFPQN(de)ITMR                        | 1739.8123 | IPI0033144C | IPI0033144C | yes | no  |       | 2 | 0.000577    | 127.71 |
| CPMAGISHTTWHSN(de)R                       | 1753.7777 | IPI00130764 | IPI00130764 | yes | no  | 2,3   |   | 5.1494E-11  | 190.24 |
| CPIITPFNDTNVVHTVNTAIAAFNTQNN(de)GTYFK     | 3681.7886 | IPI00128249 | IPI00128249 | yes | yes | 3,4   |   | 2.5203E-18  | 161.49 |
| CPIITPFN(de)DTNVVHTVNTAIAAFNTQNNGTYFK     | 3681.7886 | IPI00128249 | IPI00128249 | yes | yes | 3,4   |   | 2.5203E-18  | 161.49 |
| CNSVITYN(de)ITPVVQK                       | 1734.8975 | IPI00222967 | IPI00222967 | yes | no  |       | 2 | 7.6912E-29  | 219.52 |
| CN(de)ITIKDPTPADPIWYEA                    | 2231.0933 | IPI00114842 | IPI00114842 | yes | no  |       | 2 | 0.001305    | 150.91 |
| CN(de)ASSQFICSSGR                         | 1472.6136 | IPI00119063 | IPI00119063 | yes | yes |       | 2 | 0.0015131   | 127.32 |
| CIVPHTVN(de)ISSAWRNHSIPIETK               | 2658.37   | IPI00129041 | IPI00129041 | yes | no  |       | 3 | 0.031276    | 57.41  |
| CIVPHTVN(de)ISSAWR                        | 1638.83   | IPI00129041 | IPI00129041 | yes | no  |       | 2 | 5.6014E-06  | 166.03 |
| CISPNVTSCACTIN(de)FTIK                    | 2084.9693 | IPI00387318 | IPI00387318 | yes | yes |       | 2 | 1.8804E-36  | 225.54 |
| CISPN(de)VTSCACTINFTIK                    | 2084.9693 | IPI00387318 | IPI00387318 | yes | yes |       | 2 | 1.8804E-36  | 225.54 |
| CISKN(de)YTTDIITK                         | 1555.7916 | IPI0012464C | IPI0012464C | yes | yes |       | 2 | 0.032145    | 91.307 |
| CIQMSSFAN(de)R                            | 1212.538  | IPI00320065 | IPI00320065 | yes | no  |       | 2 | 7.2309E-68  | 248.88 |
| CIQHFYGPNEHCFCN(de)R                      | 2114.8952 | IPI0013042C | IPI0013042C | yes | no  |       | 3 | 9.9973E-05  | 171.73 |
| CIPHFAMIGNDTVMCTEQGN(de)WTRIPPECIEVK      | 3705.687  | IPI00322463 | IPI00322463 | yes | no  |       | 4 | 4.268E-09   | 120.63 |
| CIPHFAMIGNDTVMCTEQGN(de)WTR               | 2737.1869 | IPI00322463 | IPI00322463 | yes | no  |       | 3 | 1.8474E-06  | 149.44 |
| CIPHFAMIGN(de)DTVMCTEQGNWTRIPPECIEVK      | 3705.687  | IPI00322463 | IPI00322463 | yes | no  |       | 4 | 4.268E-09   | 120.63 |
| CIPHFAMIGN(de)DTVMCTEQGNWTR               | 2737.1869 | IPI00322463 | IPI00322463 | yes | no  |       | 3 | 1.8474E-06  | 149.44 |
| CIN(de)GTINYPTCV                          | 1410.6272 | IPI0013001C | IPI0013001C | yes | no  |       | 2 | 0.001397    | 160.67 |
| CHEGN(de)GTFECGACR                        | 1653.6082 | IPI00132474 | IPI00132474 | yes | yes | 2,3   |   | 3.0839E-06  | 169.4  |
| CGNCN(de)ITSIEDEDFCK                      | 1960.7601 | IPI00137599 | IPI00137599 | yes | yes |       | 2 | 1.002E-112  | 280.7  |
| CFNAMEVDAIN(de)SSHPVSTPVENPAQIR           | 2982.3964 | IPI00318595 | IPI00318595 | yes | no  |       | 3 | 5.0249E-45  | 233.68 |
| CF(de)ANKVNISFPSAQSIASDTHIK               | 2631.3115 | IPI00624663 | IPI00624663 | yes | yes | 2,3,4 |   | 1.2157E-39  | 229.75 |
| CEVICNQ(de)SNKPITITVEQSR                  | 2375.1573 | IPI00626537 | IPI00626537 | yes | yes |       | 3 | 0.0016497   | 106.57 |
| CEQEASEDIKPAITGN(de)K                     | 1888.8837 | IPI00134808 | IPI00134808 | yes | no  |       | 2 | 1.4063E-36  | 231.06 |
| CDPISETQQWIFEHIN(de)MTVIEKNSHYAIS         | 3489.6333 | IPI00761633 | IPI00761633 | yes | yes |       | 3 | 0.03058     | 47.38  |
| CDGDFDCEDRTDEAN(de)CSVK                   | 2291.8365 | IPI0051536C | IPI0051536C | yes | no  |       | 2 | 7.2265E-08  | 191.35 |
| CCGWVSHYN(de)WTENEIMGFTK                  | 2647.093  | IPI00108098 | IPI00108098 | yes | no  |       | 3 | 0.029768    | 53.768 |
| CAMDIGVNYIGTVN(de)VTHTGIQCQIWR            | 3005.431  | IPI00114206 | IPI00114206 | yes | yes |       | 3 | 0.0003138   | 80.236 |
| CAISHAITIEFHQDGNPENVGIYN(de)ISR           | 3111.4832 | IPI00222429 | IPI00222429 | yes | yes | 3,4   |   | 9.3476E-20  | 198.6  |
| C(de)IVPHTVNISAWRNHSIPIETK                | 2658.37   | IPI00129041 | IPI00129041 | yes | no  |       | 3 | 0.031276    | 57.41  |
| AYTIFVPTNHSIETQGN(de)NSVIGIDTVR           | 2945.4883 | IPI00987265 | IPI00987265 | yes | no  |       | 3 | 0.0001824   | 87.802 |
| AYTIFVPTN(de)HSIETQGNNSVIGIDTVR           | 2945.4883 | IPI00987265 | IPI00987265 | yes | no  |       | 3 | 0.0001824   | 87.802 |
| AY(de)AISGPTVQDGIPPFNWNRFNETIHR           | 3099.5315 | IPI00471081 | IPI00471081 | yes | yes | 3,4   |   | 0.0001812   | 100.76 |
| AWN(de)YTVDTPHGMFVSGTPEQSVWITDVGSGPYGHTVK | 4166.9473 | IPI00228567 | IPI00228567 | yes | yes |       | 4 | 0.0001382   | 64.885 |
| AWGISVINPN(de)KTK                         | 1426.7932 | IPI00989096 | IPI00989096 | yes | no  |       | 2 | 0.0005154   | 158.11 |
| AWEKEIHHI(de)QEQNVSNNFIDKEEFFIGSK         | 3500.7365 | IPI00605187 | IPI00605187 | yes | no  |       | 3 | 8.6266E-12  | 150.36 |
| AVYEAIRN(de)CSIEDDSVR                     | 1995.932  | IPI00856861 | IPI00856861 | yes | no  |       | 2 | 0.0029646   | 120.63 |
| AVVGSYTTTN(de)VSIIAPR                     | 1747.9468 | IPI00330481 | IPI00330481 | yes | yes |       | 2 | 8.7727E-05  | 151.48 |
| AVNAHVEIGYSTIVGVFHTEYGAIN(de)R            | 2816.4246 | IPI00132444 | IPI00132444 | yes | yes | 3,4   |   | 2.319E-09   | 171.29 |
| AVN(de)QTGAIYQCDYSTSR                     | 1932.8636 | IPI00120674 | IPI00120674 | yes | no  |       | 2 | 6.5469E-10  | 193.19 |
| AVN(de)QSMIR                              | 917.47529 | IPI0047109C | IPI0047109C | yes | yes |       | 2 | 0.029604    | 118.5  |
| AVKIN(de)ETIGNQDK                         | 1428.7573 | IPI00309999 | IPI00309999 | yes | yes |       | 2 | 0.0036271   | 121.18 |
| AVISMIN(de)ETMNEAPEETK                    | 2005.9336 | IPI00470184 | IPI00470184 | yes | no  | 2,3   |   | 1.3368E-179 | 311.92 |
| AVGAVDWDSHPYGYN(de)ITIQAK                 | 2304.1175 | IPI00623114 | IPI00623114 | yes | no  |       | 2 | 0.030995    | 66.874 |
| AVCGIN(de)TSDRCDFVR                       | 1768.7985 | IPI00127134 | IPI00127134 | yes | no  |       | 2 | 0.046389    | 84.468 |
| AVCGIN(de)TSDR                            | 1091.503  | IPI00127134 | IPI00127134 | yes | no  |       | 2 | 0.02362     | 101.38 |
| ATVN(de)DSGEYR                            | 1110.4942 | IPI00129485 | IPI00129485 | yes | no  |       | 2 | 0.0089509   | 123.51 |
| ATPNEGFFNQN(de)ITTFYYDR                   | 2297.0389 | IPI00315535 | IPI00315535 | yes | yes | 2,3   |   | 1.3579E-62  | 250.04 |
| ATIITFICDRDAGVGFPEYQEEDN(de)STYNFR        | 3527.594  | IPI00308971 | IPI00308971 | yes | yes |       | 3 | 3.2051E-14  | 149.73 |
| ATHN(de)DSGSYFCR                          | 1413.5732 | IPI0016287C | IPI0016287C | yes | yes |       | 2 | 0.0045144   | 112.51 |
| ATDADINDIIVYTIQEVTPN(de)ASK               | 2490.249  | IPI00314132 | IPI00314132 | yes | no  |       | 3 | 1.666E-05   | 119.62 |
| ASVVN(de)VTQHCTMESWESMNEVAR               | 2664.1731 | IPI0012124C | IPI0012124C | yes | yes | 2,3   |   | 2.5673E-06  | 124.2  |



|                                          |           |             |             |     |     |         |   |             |        |
|------------------------------------------|-----------|-------------|-------------|-----|-----|---------|---|-------------|--------|
| ASSFRPN(de)GTK                           | 1150.5731 | IPI00113797 | IPI00113797 | yes | yes |         | 2 | 0.033848    | 96.82  |
| ASSIMVN(de)ITEIFPKPK                     | 1773.9699 | IPI00406901 | IPI00406901 | yes | no  |         | 2 | 2.3102E-08  | 186.42 |
| ASQQISN(de)ETSSFGFNIIR                   | 1997.9807 | IPI0015325E | IPI0015325E | yes | no  | 2,3     |   | 3.7023E-62  | 248.46 |
| ASIITGKYPHNHHVVN(de)NTIEGNCSK            | 2876.3988 | IPI0022142E | IPI0022142E | yes | yes |         | 3 | 3.7142E-09  | 131.56 |
| ASIITGKYPHNHHVV(de)NNTIEGNCSK            | 2876.3988 | IPI0022142E | IPI0022142E | yes | yes |         | 3 | 3.7142E-09  | 131.56 |
| ASGN(de)FSQVDWFIIHK                      | 1747.8682 | IPI0046912E | IPI0046912E | yes | no  | 2,3     |   | 0.0011385   | 129.01 |
| AQTN(de)YTCVAEIIYR                       | 1700.8192 | IPI0032305E | IPI0032305E | yes | no  |         | 2 | 1.6232E-06  | 165.49 |
| AQAGNKSQDSGIAEMEEIPVPHNIKINN(de)ITCDSFK  | 3854.8567 | IPI00969894 | IPI00969894 | yes | yes |         | 4 | 0.026275    | 49.967 |
| AQAGN(de)KSQDSGIAEMEEIPVPHNIKINNITCDSFK  | 3854.8567 | IPI00969894 | IPI00969894 | yes | yes |         | 4 | 0.026275    | 49.967 |
| AQAAIDKAN(de)ASR                         | 1214.6367 | IPI0011906E | IPI0011906E | yes | yes |         | 2 | 1.0608E-08  | 175.21 |
| APYTIEN(de)SSHR                          | 1273.6051 | IPI0047129E | IPI0047129E | yes | no  |         | 2 | 0.0075123   | 109.72 |
| APQHVVNHIIPPYTN(de)VSIK                  | 2013.0796 | IPI0012304C | IPI0012304C | yes | no  | 2,3     |   | 0.0003396   | 159.04 |
| APIPTAIDTN(de)SSKTPSIFPCASGAFSSFR        | 3026.4808 | IPI0011980E | IPI0011980E | yes | no  |         | 4 | 0.032709    | 52.366 |
| APIPTAIDTN(de)SSK                        | 1313.6827 | IPI0011980E | IPI0011980E | yes | no  |         | 2 | 0.0027209   | 118.24 |
| ANQVIPHN(de)TTFQTEPTK                    | 2038.0484 | IPI00466371 | IPI01026704 | no  | no  | 2,3     |   | 2.2327E-05  | 176.49 |
| ANISKYSIVMEADSGTFIPTGIQF(de)TGSDK        | 3076.5063 | IPI0012605C | IPI0012605C | yes | no  |         | 3 | 0.01779     | 59.046 |
| ANIQKGENPSQYGITAF(de)NHPINITK            | 2754.4089 | IPI00112614 | IPI00112614 | yes | yes |         | 3 | 0.047571    | 48.597 |
| ANIQFGENGT(de)TISAVTNK                   | 1863.9327 | IPI00127447 | IPI00127447 | yes | yes | 2,3     |   | 3.8652E-95  | 273.82 |
| ANEQVIQNIN(de)HTYK                       | 1670.8376 | IPI00876541 | IPI00876541 | yes | no  |         | 2 | 8.5401E-07  | 169.3  |
| AN(de)YTIKGNENGNFK                       | 1681.8424 | IPI0013820E | IPI0013820E | yes | no  |         | 2 | 0.0004752   | 145.1  |
| AN(de)YTIK                               | 821.4647  | IPI0013820E | IPI0013820E | yes | no  |         | 2 | 0.0023591   | 161.68 |
| AN(de)TSIEIIIIEGVR                       | 1413.7827 | IPI0098851E | IPI0098851E | yes | no  |         | 2 | 0.0014353   | 129.54 |
| AN(de)KSSDIVSANR                         | 1260.6422 | IPI0013664E | IPI0013664E | yes | yes |         | 2 | 0.012091    | 104.59 |
| AN(de)ISSQVIK                            | 958.54475 | IPI00322867 | IPI00322867 | yes | no  |         | 2 | 0.015968    | 123.86 |
| AN(de)GTTVHVGIHPSK                       | 1416.7474 | IPI0013246C | IPI0013246C | yes | no  |         | 2 | 0.0016696   | 121.45 |
| AN(de)ESRIIEADQIYR                       | 1692.8067 | IPI00224237 | IPI00224237 | yes | no  |         | 2 | 0.0024492   | 128.22 |
| AN(de)DTREEAGIPAAGEDETSWTER              | 2504.1052 | IPI00653847 | IPI00653847 | yes | no  |         | 3 | 0.0004474   | 108.25 |
| AN(de)DSDQGANAIEIDYTFHQAPEVVR            | 2802.2957 | IPI00719927 | IPI00719927 | yes | no  |         | 3 | 3.1657E-12  | 186.11 |
| AN(de)DSDQGANAIEIDYTFHQAPEVVR            | 2646.1946 | IPI00719927 | IPI00719927 | yes | no  |         | 3 | 2.487E-07   | 156.51 |
| AMSSN(de)ETAAYKIMR                       | 1571.7436 | IPI0031646E | IPI0031646E | yes | yes |         | 2 | 0.013204    | 92.063 |
| AMN(de)ISASSMTITWK                       | 1539.7425 | IPI0046942E | IPI0046942E | yes | no  |         | 2 | 4.2469E-39  | 228.03 |
| AMIINQHVPMESSHIIQFVN(de)WSSIIPERYK       | 3694.9116 | IPI0038728E | IPI0038728E | yes | yes | 3,4,5,6 |   | 1.2689E-14  | 170.59 |
| AMIINQHVPMESSHIIQFVN(de)WSSIIPERYK       | 3566.8167 | IPI0038728E | IPI0038728E | yes | yes | 3,4,5   |   | 1.6081E-14  | 143.48 |
| AMIINQHVPMESSHIIQFVN(de)WSSIIPER         | 3275.6584 | IPI0038728E | IPI0038728E | yes | yes | 3,4     |   | 5.4695E-12  | 181.82 |
| AMGVNVIAANTHN(de)TSMHMTGSGIYSPEAVR       | 3115.4638 | IPI0023041E | IPI0023041E | yes | yes | 3,4     |   | 3.9842E-15  | 135.62 |
| AMFN(de)ITIIYPNNIIAISNMIPK               | 2490.3379 | IPI0031950E | IPI0031950E | yes | yes | 2,3     |   | 4.1228E-07  | 141.83 |
| AKEWGYAS(de)HNGPDHWHEIYPIAK              | 2705.2775 | IPI0022189C | IPI0022189C | yes | yes |         | 3 | 0.0017339   | 94.057 |
| AIWIIN(de)GSK                            | 1000.5706 | IPI0012466E | IPI0012466E | yes | yes |         | 2 | 0.019243    | 118.71 |
| AIVN(de)FTR                              | 819.46029 | IPI0051536C | IPI0051536C | yes | no  |         | 2 | 0.03315     | 106.36 |
| AISPN(de)STISSAPK                        | 1271.6721 | IPI00460291 | IPI00460291 | yes | no  |         | 2 | 0.0010868   | 146.59 |
| AISCISSWKTIEQERN(de)ASFVYTK              | 2846.3909 | IPI0012322E | IPI0012322E | yes | yes |         | 3 | 0.0058892   | 87.352 |
| AINASAN(de)ITSDGVEVIGR                   | 1785.9221 | IPI0033063E | IPI0033063E | yes | no  |         | 2 | 0.0030716   | 106.57 |
| AIN(de)VTISSMGRNGIK                      | 1559.8454 | IPI00131091 | IPI00131091 | yes | no  |         | 2 | 0.0077158   | 106.42 |
| AIN(de)VTISSMGR                          | 1147.6019 | IPI00131091 | IPI00131091 | yes | no  |         | 2 | 0.0014458   | 142.97 |
| AIN(de)SSTEDGIK                          | 1289.6575 | IPI0012916E | IPI0012916E | yes | yes |         | 2 | 0.009621    | 100.04 |
| AIN(de)GSAIYTGSSIDFVR                    | 1769.8948 | IPI00877197 | IPI00877197 | yes | no  |         | 2 | 1.5744E-17E | 305.43 |
| AIN(de)DSIHYINR                          | 1314.668  | IPI0080834E | IPI0080834E | yes | no  |         | 2 | 0.005026    | 118.48 |
| AIN(de)ASANITSDGVEVIGR                   | 1785.9221 | IPI0033063E | IPI0033063E | yes | no  |         | 2 | 0.0030716   | 106.57 |
| AIMKEVMNIIQPIN(de)VTK                    | 1941.0791 | IPI0012605C | IPI0012605C | yes | no  | 2,3     |   | 2.3891E-07  | 170.89 |
| AIMDICDQIEKN(de)QTK                      | 1805.8652 | IPI0065863E | IPI0065863E | yes | yes |         | 2 | 1.165E-256  | 237.46 |
| AIKSHGIWN(de)NTVFIFSTDNGGQTR             | 2662.3252 | IPI0065235E | IPI0065235E | yes | no  |         | 3 | 0.024008    | 70.538 |
| AIKGETVN(de)TSIPFSFEGIIIPK               | 2394.2835 | IPI00119324 | IPI00119324 | yes | no  |         | 3 | 0.016034    | 77.631 |
| AIIQGIPEQN(de)YTVQIIAYYKDK               | 2680.4476 | IPI0033063E | IPI0033063E | yes | no  |         | 3 | 0.023121    | 70.334 |
| AIIQGIPEQN(de)YTVQIIAYYK                 | 2437.3257 | IPI0033063E | IPI0033063E | yes | no  |         | 3 | 0.0001059   | 170.11 |
| AIGYEN(de)ATQAIGR                        | 1362.6892 | IPI0011980E | IPI0011980E | yes | no  |         | 2 | 2.5625E-24  | 208.82 |
| AIGITEMFEPKAN(de)FTK                     | 1882.9499 | IPI0011506E | IPI0011506E | yes | yes |         | 2 | 0.002819    | 123.4  |
| AIEIQFGMN(de)ASSIFFIQGVR                 | 2314.178  | IPI0046921E | IPI0046921E | yes | yes |         | 3 | 5.8925E-05  | 139.88 |
| AIDREAETVRNGIYN(de)ITVIAIDADGR           | 2844.473  | IPI0013820E | IPI0013820E | yes | no  |         | 3 | 0.020081    | 68.634 |
| AIDIDPSKTN(de)VSGGAIAGHPIGGSGSR          | 2646.3725 | IPI0022643C | IPI0022643C | yes | yes |         | 3 | 1.1834E-10  | 145.2  |
| AIAGIVYN(de)SSGTEPCYDIYR                 | 2248.047  | IPI0033155C | IPI0033155C | yes | yes | 2,3     |   | 3.9606E-78  | 260.31 |
| AIAAAGYDVEKN(de)NSR                      | 1577.7798 | IPI00223714 | IPI00223714 | no  | no  |         | 2 | 4.5498E-05  | 158.93 |
| AHFSSIN(de)ITIR                          | 1257.683  | IPI00466371 | IPI01026704 | no  | no  |         | 2 | 2.5598E-13  | 193.28 |
| AGYFN(de)FTSATITYIAQEDGPVIGSTSAPGQGIIAQR | 3856.9272 | IPI0046718C | IPI0046718C | yes | yes |         | 4 | 2.1724E-27  | 150.82 |
| AGVVVFN(de)CSIR                          | 1220.6336 | IPI0031477E | IPI0031477E | yes | yes |         | 2 | 0.020574    | 95.477 |
| AGPN(de)GTIFVVDAYK                       | 1450.7456 | IPI0022199E | IPI0022199E | yes | yes |         | 2 | 5.8164E-15  | 194.55 |
| AGMASPIYN(de)VTWSAGWK                    | 1837.8821 | IPI00666034 | IPI00666034 | yes | no  |         | 2 | 0.026892    | 82.007 |
| AGIN(de)ASYSEK                           | 1038.4982 | IPI00308971 | IPI00308971 | yes | yes |         | 2 | 0.0010053   | 161.67 |
| AGEQINNHVKN(de)KTQGK                     | 1764.9231 | IPI0011610E | IPI0011610E | yes | no  | 2,3     |   | 0.0079229   | 118.21 |
| AGEQINNHVKN(de)K                         | 1350.7004 | IPI0011610E | IPI0011610E | yes | no  |         | 2 | 0.025003    | 96.604 |
| AFYN(de)GTWYR                            | 1176.5352 | IPI0085831E | IPI0085831E | yes | no  |         | 2 | 0.0010322   | 168.83 |
| AFVEN(de)ITVIENSIVFK                     | 1821.9877 | IPI0074238E | IPI0074238E | yes | no  | 2,3     |   | 0           | 370.3  |
| AFQIN(de)TFNIKVQPFNVTK                   | 2108.1419 | IPI00222967 | IPI00222967 | yes | no  |         | 3 | 0.032864    | 82.349 |
| AFPEVCN(de)ETMMAIWEECKPCIK               | 2742.1984 | IPI0032042C | IPI0032042C | yes | no  |         | 3 | 0.0030842   | 88.283 |
| AFNISPN(de)DTSSGSCGINIVTIK               | 2294.1213 | IPI0046921E | IPI0046921E | yes | yes | 2,3     |   | 7.3206E-11E | 277.25 |
| AFN(de)ITWISTDFK                         | 1441.7242 | IPI0011806E | IPI0011806E | yes | no  |         | 2 | 0.000688    | 158.58 |
| AFN(de)ECCTIANK                          | 1326.5697 | IPI0033083E | IPI0033083E | yes | yes |         | 2 | 2.2026E-05  | 162.49 |
| AFMN(de)SSFTIDPK                         | 1356.6384 | IPI0012136E | IPI0012136E | yes | no  |         | 2 | 3.5093E-19  | 199.8  |
| AFITNF(de)SMIIDGVTPGVVK                  | 2171.1337 | IPI00312711 | IPI00312711 | yes | no  | 2,3     |   | 7.0773E-28  | 220.62 |
| AFIN(de)GTGVETVVSADIPNAHGIAVDWVSR        | 2994.5199 | IPI0011906E | IPI0011906E | yes | yes | 3,4     |   | 1.576E-14   | 178.11 |
| AFFDETKN(de)NTR                          | 1341.6313 | IPI00120674 | IPI00120674 | yes | no  |         | 2 | 0.0027234   | 141.08 |
| AEQITIHAIGIGEANKT(de)QIR                 | 2162.1808 | IPI0099093E | IPI0099093E | yes | no  |         | 3 | 0.028883    | 77.031 |
| AEPINASAGDQ(de)EEK                       | 1554.7162 | IPI0012334E | IPI0012334E | yes | yes | 2,3     |   | 0.008687    | 101.2  |
| AEISN(de)HTRPVIIIPGICGNRIEAK             | 2643.4279 | IPI0013350C | IPI0013350C | yes | yes | 3,4     |   | 1.0586E-05  | 122.64 |
| AEISN(de)HTRPVIIIPGICGNR                 | 2202.1692 | IPI0013350C | IPI0013350C | yes | yes | 2,3     |   | 0.0001981   | 168.41 |
| AEDYGPVEVISHWHPNITINI(de)VDDHTPWVK       | 3480.7103 | IPI00121627 | IPI00121627 | yes | yes |         | 4 | 3.3306E-06  | 89.079 |
| AEDYGPVEVISHWHPNI(de)TINIVDDHTPWVK       | 3480.7103 | IPI00121627 | IPI00121627 | yes | yes |         | 4 | 3.3306E-06  | 89.079 |

|                               |           |             |             |     |     |     |            |        |
|-------------------------------|-----------|-------------|-------------|-----|-----|-----|------------|--------|
| ADSIYSQVVGISASQAN(de)ISK      | 2037.0378 | IPI00115116 | IPI00115116 | yes | yes | 3   | 9.9095E-78 | 254.58 |
| ADN(de)YTYEHIR                | 1280.5786 | IPI00273133 | IPI00273133 | yes | yes | 2   | 0.020031   | 104.79 |
| ADANPPATEYHWTTIN(de)GSIPK     | 2282.0968 | IPI00311405 | IPI00311405 | yes | yes | 2,3 | 0.0005902  | 107.65 |
| ACN(de)ATNWIEYMFNK            | 1760.7651 | IPI0013260C | IPI0013260C | yes | no  | 2   | 4.0563E-05 | 160.78 |
| ACMN(de)ETRIIEIR              | 1520.7075 | IPI0039684C | IPI0039684C | yes | no  | 2   | 0.0023808  | 131.06 |
| AAN(de)CTQVIVWHTR             | 1554.7725 | IPI00116744 | IPI00116744 | yes | yes | 2   | 0.0013798  | 142.1  |
| AAGVIEDVYN(de)RTQGIIAGHGIIQIA | 2578.3867 | IPI00169617 | IPI00169617 | yes | yes | 2   | 1.0745E-08 | 161.2  |
| AAEN(de)FTIIVK                | 1104.6179 | IPI00471089 | IPI00471089 | yes | no  | 2   | 0.016008   | 108.9  |
| AACAVRPQEVMTMVN(de)GTITNPVTGK | 2513.273  | IPI00308971 | IPI00308971 | yes | yes | 2,3 | 1.198E-06  | 175.93 |
| A(de)YVFERNQSVGDPNVDIIR       | 2191.1022 | IPI00127447 | IPI00127447 | yes | yes | 2,3 | 6.2046E-19 | 205.95 |
| A(de)VAYGEKNITFQGPIPK         | 1831.9832 | IPI00111794 | IPI00111794 | yes | no  | 2,3 | 2.9802E-27 | 219.97 |
| A(de)RNISGVVIADHSGSFHNR       | 2036.03   | IPI00118674 | IPI00118674 | yes | yes | 3   | 0.014586   | 90.385 |
| A(de)QAECRNTTHIIQR            | 1696.8427 | IPI00321222 | IPI00321222 | yes | yes | 2,3 | 0.025582   | 94.122 |

N-terminal Ser/Thr  
ratio

15  
1.04%
